# Supplementary material for: Ethylene Response Factor SlERF.D6 promotes ripening initiation and ethylene response through downstream transcription factors SlDEAR2 and SlTCP12
Source: Research Square preprint supplement (doi:10.21203/rs.3.rs-4018812/v1), 2024-03-25
Supplement: Supplementary file 1 [file Dataset_S1.xlsx]

## Sheet: Sheet1
Solyc ID	Name
Solyc05g012020	RIN
Solyc10g006880	NOR
Solyc02g077920	CNR
Solyc10g083630	DML2
Solyc06g069430	FUL1
Solyc03g114830	FUL2
Solyc02g071730	TAG1
Solyc07g055920	TAGL1
Solyc06g064840	MBP3
Solyc03g118290	ARF2a
Solyc07g052960	GRAS38
Solyc07g063420	NOR-like1
Solyc11g072470	LOB1
Solyc05g052030	ERF.B3
Solyc02g077840	ERF.F12
Solyc03g118190	ERF.D7
Reference:	R. Wang, G. C. Angenent, G. Seymour, R. A. de Maagd, Revisiting the Role of Master Regulators in Tomato Ripening. Trends in Plant Science 25, 291–301 (2020).
	S. Li, K. Chen, D. Grierson, Molecular and Hormonal Mechanisms Regulating Fleshy Fruit Ripening. Cells 10, 1136 (2021).
	J. Vrebalov, A MADS-Box Gene Necessary for Fruit Ripening at the Tomato Ripening-Inhibitor (Rin) Locus. Science 296, 343–346 (2002).
	K. Manning, et al., A naturally occurring epigenetic mutation in a gene encoding an SBP-box transcription factor inhibits tomato fruit ripening. Nature genetics 38, 948–52 (2006).
	J. Vrebalov, et al., Fleshy Fruit Expansion and Ripening Are Regulated by the Tomato SHATTERPROOF Gene TAGL1. The Plant Cell 21, 3041–3062 (2009).
	M. Bemer, et al., The Tomato FRUITFULL Homologs TDR4/FUL1 and MBP7/FUL2 Regulate Ethylene-Independent Aspects of Fruit Ripening. The Plant Cell 24, 4437–4451 (2012).
	Z. Lin, et al., A tomato HD-Zip homeobox protein, LeHB-1, plays an important role in floral organogenesis and ripening. The Plant Journal 55, 301–310 (2008).
	M.-Y. Chung, et al., A tomato (Solanum lycopersicum) APETALA2/ERF gene, SlAP2a, is a negative regulator of fruit ripening: SlAP2a,a negative regulator of tomato fruit ripening. The Plant Journal 64, 936–947 (2010).
	M. Liu, et al., The chimeric repressor version of an Ethylene Response Factor ( ERF ) family member, Sl-ERF.B3 , shows contrasting effects on tomato fruit ripening. New Phytologist 203, 206–218 (2014).
	Y. Hao, et al., Auxin Response Factor SlARF2 Is an Essential Component of the Regulatory Mechanism Controlling Fruit Ripening in Tomato. PLOS Genetics 11, e1005649 (2015).
	D. A. Breitel, et al., AUXIN RESPONSE FACTOR 2 Intersects Hormonal Signals in the Regulation of Tomato Fruit Ripening. PLOS Genetics 12, e1005903 (2016).
	Y. Shinozaki, et al., High-resolution spatiotemporal transcriptome mapping of tomato fruit development and ripening. Nat Commun 9, 364 (2018).
	Y. Gao, et al., A NAC transcription factor, NOR-like1, is a new positive regulator of tomato fruit ripening. Hortic Res 5, 75 (2018).
	J. Zhang, et al., An AGAMOUS MADS-box protein, SlMBP3, regulates the speed of placenta liquefaction and controls seed formation in tomato. Journal of Experimental Botany 70, 909–924 (2019).
	Y. Gao, et al., Re-evaluation of the nor mutation and the role of the NAC-NOR transcription factor in tomato fruit ripening. Journal of Experimental Botany 71, 3560–3574 (2020).
	Y. Shi, et al., A tomato LATERAL ORGAN BOUNDARIES transcription factor, SlLOB1 , predominantly regulates cell wall and softening components of ripening. Proc Natl Acad Sci USA 118, e2102486118 (2021).
