# Supplementary material for: Ethylene Response Factor SlERF.D6 promotes ripening initiation and ethylene response through downstream transcription factors SlDEAR2 and SlTCP12
Source: Research Square preprint supplement (doi:10.21203/rs.3.rs-4018812/v1), 2024-03-25
Supplement: Supplementary file 4 [file Dataset_S2.xlsx]

## Sheet: Expression levels
Gene	Annotation	Solyc ID	Pericarp Anthesis	Pericarp 5DPA	Pericarp 10DPA	Pericarp 20DPA	Pericarp 30DPA	Total_Pericarp:Mature_Green_stem RPM	Total_Pericarp:Mature_Green_equatorial RPM	Total_Pericarp:Mature_Green_stylar RPM	Pericarp MG	Total_Pericarp:Breaker_stem RPM	Total_Pericarp:Breaker_equatorial RPM	Total_Pericarp:Breaker_stylar RPM	Pericarp Br	Total_Pericarp:Pink_stem RPM	Total_Pericarp:Pink_equatorial RPM	Total_Pericarp:Pink_stylar RPM	Pericarp Pink	Pericarp LR	Pericarp RR	Locule Anthesis	Locule 5DPA	Locule 10DPA	Locule 20DPA	Locule 30DPA	Locular_Tissue:Mature_Green_stem RPM	Locular_Tissue:Mature_Green_equatorial RPM	Locular_Tissue:Mature_Green_stylar RPM	Locule MG	Locular_Tissue:Breaker_stem RPM	Locular_Tissue:Breaker_equatorial RPM	Locular_Tissue:Breaker_stylar RPM	Locule Br	Locular_Tissue:Pink_stem RPM	Locular_Tissue:Pink_equatorial RPM	Locular_Tissue:Pink_stylar RPM	Locule Pink	Locule LR	Locule RR
BLH1	BEL1-like homeodomain protein 1	Solyc01g007070	11.6	73.94	180.27	222.65	408.74	414.19	424.88	412.96	417.343	317.16	325.33	348.66	330.383	338.18	397.8	383.39	373.123	353.96	382.36	22.21	2.27	220.59	485.99	660.76	526.93	667.33	597	597.087	213.59	242.48	247.58	234.55	362.9	342.56	401.61	369.023	488.87	525.11
MYC6	bHLH transcription factor	Solyc01g102300	20.15	24.95	36.08	90.84	126.96	99.97	113.14	120.39	111.167	70.53	80.07	81.37	77.3233	55.1	57.85	59.21	57.3867	48.91	56.36	11.05	6.24	15.69	18.99	22.41	26.3	26.05	25.01	25.7867	36.75	40.29	37.53	38.19	37.26	37	33.7	35.9867	41.37	57.23
bZIP8	bZIP transcription factor	Solyc01g104650	15.59	9.18	8.26	26.59	35.18	16.02	26.64	37.76	26.8067	79.81	138.57	186.2	134.86	250	351.08	534.75	378.61	429.75	407.53	33.52	2.26	16.58	30.26	44.03	72.28	112.94	119.37	101.53	360.45	617.6	688.48	555.51	456.34	592.18	724.98	591.167	585.11	551.72
WOX14	WUSCHEL-related homeobox 14	Solyc02g082670	11.02	39.5	44.68	39.02	34.33	46.8	47.66	41.34	45.2667	208.45	191.93	188.77	196.383	153.84	134.13	123.03	137	123.55	130.19	8.59	17.19	41.14	46.18	87.42	161.12	159.76	166.72	162.533	105.91	126.76	124.37	119.013	102.62	100.43	108.06	103.703	120.7	150.57
HZL2	Homeobox-leucine zipper-like protein	Solyc02g087840	0	9.12	63.16	149.3	113.34	121.78	114.11	92.15	109.347	42.34	32.6	20.97	31.97	1.79	1.16	0.44	1.13	0.66	0.15	2.12	2.31	161.42	188.98	230.63	147.59	116.17	143.26	135.673	6.37	3.28	3.48	4.37667	2.04	0.51	0.17	0.906667	0.48	0.46
VAH1	HD-ZIP family protein	Solyc03g113270	48.59	54.76	76.88	174.33	313.33	229.88	265.27	297.06	264.07	400.87	538.92	547.61	495.8	824.72	745.52	900.86	823.7	853.99	743.2	35.28	3.18	77.36	224.99	332.9	513.2	588.64	479.6	527.147	1193.26	1210.09	1246.15	1216.5	1289.34	1553.08	1584.58	1475.67	1186.04	1051.03
ERF.D6	AP2/ERF family member	Solyc04g071770	10.49	0.47	0.24	0.38	0.29	0.9	0.68	0.63	0.736667	7.26	8.54	7.87	7.89	23.1	27.67	23.73	24.8333	22.81	19.95	4.22	0.24	0.42	0.93	3.65	28.37	31.74	28.16	29.4233	57.31	64.17	65.43	62.3033	64.12	66.82	73.91	68.2833	64.95	69.33
NAC39	NAC domain transcription factor	Solyc05g007770	1.22	0.07	0.05	0.48	0.35	0.4	0.49	1.16	0.683333	5.95	8.56	7.86	7.45667	24.77	18.94	24.9	22.87	16.71	17.01	0.15	0	0.25	1.78	1.88	9.21	7.84	5.96	7.67	62.89	51.86	48.3	54.35	61.74	57.58	62.85	60.7233	66.65	85.75
HsfA6b	Heat shock factor	Solyc06g053960	0.88	6.89	24.47	59.48	64.55	47.95	57.08	84.2	63.0767	321.03	406.37	409.02	378.807	547.59	440.33	511.16	499.693	467.84	484.57	0	0.07	11.45	18.29	34.8	123.03	127.15	101.06	117.08	235.56	233.09	267.62	245.423	293.07	304.08	324.97	307.373	374.74	388.24
ARR11	Two-component response regulator	Solyc08g077230	59.79	34.17	28.42	14.65	11.12	10.7	11.8	9.72	10.74	41.44	39.36	35.46	38.7533	47.62	52.55	43.27	47.8133	43.47	25.79	79.49	93.28	117.48	93.1	56.68	37.91	34.17	32.58	34.8867	211.88	233.66	254.75	233.43	178.01	185.26	171.72	178.33	124.56	80.08
ZHD23	Zinc finger family protein	Solyc09g065670	14.34	41.33	77.77	63.07	32.18	25.12	27.65	21.35	24.7067	13.99	17.59	15.72	15.7667	3.52	4.56	3.67	3.91667	3.43	1.51	6.12	15.54	192.79	145.69	122.03	22.1	28.11	38.17	29.46	3.07	3.51	3.79	3.45667	2.48	2.33	3.04	2.61667	2.12	1.13
JA2	Jasmonic acid 2	Solyc12g013620	15.9	0.63	1.05	4.76	7.36	8.77	8.13	8.71	8.53667	28.59	32.83	31.98	31.1333	61.98	60.64	62.94	61.8533	68.12	83.01	6.17	0.15	8.58	25.4	37.18	29.11	32.45	37.48	33.0133	119.43	134.47	116.42	123.44	158.85	162.37	182.16	167.793	186.53	192.08

## Sheet: Editing Information
Gene	Annotation	Solyc ID	gRNA1	gRNA2	Edited line 1	Edited line 2
BLH1	BEL1-like homeodomain protein 1	Solyc01g007070	GACCAATGAGCTAAGTACCG	GTTGGACCAGCAGAGAAAGA	29-bp deletion	167-bp deletion
MYC6	bHLH transcription factor	Solyc01g102300	GTACTTGTCTCGATCCCCTG	GCTGCTGGATATCCTAACCA	4-bp deletion	216-bp deletion
bZIP8	bZIP transcription factor	Solyc01g104650	GCTGGCAGACGGAGCCCCCG	GGAAGGTGTATGGACTGCGG	1-bp deletion	232-bp deletion
WOX14	WUSCHEL-related homeobox 14	Solyc02g082670	GATGTTTGTGAAAGTGATGA	GAGACGGCGGAGGAATTGAA	heterozygous	heterozygous
HZL2	Homeobox-leucine zipper-like protein	Solyc02g087840	GATAGTTTAGGAGAAGTGGA	GCATGATTTCTGGTAGTAGA	25-bp deletion	4-bp deletion
VAH1	HD-ZIP family protein	Solyc03g113270	GTTCATCTACTGCACCGAAA	GCGAAGCTATGATGGCTCCA	7-bp deletion	87-bp deletion
ERF.D6	AP2/ERF family member	Solyc04g071770	GGATATGTCGGCAATGGTGA	GGTCGGAGAGAGGCAGAGTG	42-bp deletion	43-bp insertion
NAC39	NAC domain transcription factor	Solyc05g007770	GTTCGGGGATAATTGAGACA	GAGAATTTGGAGACAATGAG	2-bp deletion	6-bp deletion
HsfA6b	Heat shock factor	Solyc06g053960	GTCTCATGAAGACACTCCTT	GTGGATATATGAGAAAAGAT	24-bp deletion	180-bp deletion
ARR11	Two-component response regulator	Solyc08g077230	GGTTGGAAAGATTTCCCAAA	N/A	2-bp deletion	one base A changed to C
ZHD23	Zinc finger family protein	Solyc09g065670	GTAAAGTACCAGGATTTCCA	N/A	1-bp deletion	heterozygous
JA2	Jasmonic acid 2	Solyc12g013620	GTGCAATTAAGTTTACCACC	GTTTCACCAATAATTTGTAG	2-bp deletion	1-bp insertion
