# Supplementary material for: Ethylene Response Factor SlERF.D6 promotes ripening initiation and ethylene response through downstream transcription factors SlDEAR2 and SlTCP12
Source: Research Square preprint supplement (doi:10.21203/rs.3.rs-4018812/v1), 2024-03-25
Supplement: Supplementary file 7 [file Dataset_S4.xlsx]

## Sheet: Pericarp Up.full
GO ID	GO Name	GO Category	FDR	P-Value	Total DEGs	DEGs annotated	Genes annotated	Total genes	Genes
GO:0071944	cell periphery	CELLULAR_COMPONENT	1.35744e-17	1.57184e-21	874	145	2337	874	34694	Solyc06g083580.4.1;Solyc10g078510.3.1;Solyc06g011450.3.1;Solyc06g050500.2.1;Solyc11g072480.2.1;Solyc04g007910.3.1;Solyc03g121620.1.1;Solyc06g009330.3.1;Solyc08g041710.3.1;Solyc02g014030.3.1;Solyc11g010120.2.1;Solyc06g075360.3.1;Solyc04g005050.1.1;Solyc06g009290.4.1;Solyc10g083500.2.1;Solyc10g005630.3.1;Solyc07g052400.3.1;Solyc09g007510.3.1;Solyc07g150104.1.1;Solyc11g069710.2.1;Solyc06g065260.3.1;…
GO:0005886	plasma membrane	CELLULAR_COMPONENT	3.23687e-15	7.49622e-19	874	123	1950	874	34694	Solyc10g078510.3.1;Solyc06g011450.3.1;Solyc06g050500.2.1;Solyc11g072480.2.1;Solyc04g007910.3.1;Solyc03g121620.1.1;Solyc06g009330.3.1;Solyc08g041710.3.1;Solyc02g014030.3.1;Solyc06g075360.3.1;Solyc06g009290.4.1;Solyc10g083500.2.1;Solyc10g005630.3.1;Solyc07g052400.3.1;Solyc09g007510.3.1;Solyc07g150104.1.1;Solyc11g069710.2.1;Solyc06g065260.3.1;Solyc12g008400.2.1;Solyc02g070540.3.1;Solyc05g052780.4.1;…
GO:0031224	intrinsic component of membrane	CELLULAR_COMPONENT	1.45916e-11	5.06886e-15	874	299	7584	874	34694	Solyc02g093020.3.1;Solyc08g082060.3.1;Solyc03g121620.1.1;Solyc06g009330.3.1;Solyc08g041710.3.1;Solyc08g077730.3.1;Solyc10g007280.4.1;Solyc04g054690.3.1;Solyc09g064480.1.1;Solyc06g075360.3.1;Solyc04g005050.1.1;Solyc05g009010.1.1;Solyc02g036480.1.1;Solyc10g085500.2.1;Solyc05g013460.4.1;Solyc07g052400.3.1;Solyc07g054850.3.1;Solyc09g007510.3.1;Solyc07g150104.1.1;Solyc11g069710.2.1;Solyc01g087070.4.1;…
GO:0016021	integral component of membrane	CELLULAR_COMPONENT	3.43986e-11	1.59326e-14	874	295	7521	874	34694	Solyc02g093020.3.1;Solyc08g082060.3.1;Solyc03g121620.1.1;Solyc06g009330.3.1;Solyc08g041710.3.1;Solyc08g077730.3.1;Solyc10g007280.4.1;Solyc04g054690.3.1;Solyc09g064480.1.1;Solyc06g075360.3.1;Solyc04g005050.1.1;Solyc05g009010.1.1;Solyc02g036480.1.1;Solyc10g085500.2.1;Solyc05g013460.4.1;Solyc07g052400.3.1;Solyc07g054850.3.1;Solyc09g007510.3.1;Solyc11g069710.2.1;Solyc01g087070.4.1;Solyc12g094650.3.1;…
GO:0016020	membrane	CELLULAR_COMPONENT	1.69239e-08	9.79848e-12	874	344	9625	874	34694	Solyc02g093020.3.1;Solyc08g082060.3.1;Solyc03g121620.1.1;Solyc06g009330.3.1;Solyc08g041710.3.1;Solyc02g014030.3.1;Solyc08g077730.3.1;Solyc10g007280.4.1;Solyc04g054690.3.1;Solyc09g064480.1.1;Solyc04g010250.3.1;Solyc06g075360.3.1;Solyc04g005050.1.1;Solyc05g009010.1.1;Solyc02g036480.1.1;Solyc10g085500.2.1;Solyc10g083500.2.1;Solyc05g013460.4.1;Solyc07g052400.3.1;Solyc07g054850.3.1;Solyc09g007510.3.1;…
GO:0110165	cellular anatomical entity	CELLULAR_COMPONENT	3.55558e-08	2.4703e-11	874	579	18589	874	34694	Solyc08g082060.3.1;Solyc06g009330.3.1;Solyc02g014030.3.1;Solyc10g007280.4.1;Solyc03g093260.3.1;Solyc03g117490.5.1;Solyc06g075360.3.1;Solyc03g007170.3.1;Solyc04g005050.1.1;Solyc02g036480.1.1;Solyc10g085500.2.1;Solyc07g054850.3.1;Solyc07g150104.1.1;Solyc11g069710.2.1;Solyc01g087070.4.1;Solyc07g007120.3.1;Solyc12g098340.2.1;Solyc04g081440.3.1;Solyc03g114720.3.1;Solyc12g014410.2.1;Solyc01g090240.3.1;…
GO:0003824	catalytic activity	MOLECULAR_FUNCTION	2.88306e-05	2.33689e-08	874	376	11423	874	34694	Solyc11g010600.2.1;Solyc03g025390.3.1;Solyc08g082060.3.1;Solyc08g068700.1.1;Solyc02g014030.3.1;Solyc11g010120.2.1;Solyc05g054120.1.1;Solyc04g054690.3.1;Solyc09g064480.1.1;Solyc03g117490.5.1;Solyc04g010250.3.1;Solyc03g007170.3.1;Solyc04g005050.1.1;Solyc05g009010.1.1;Solyc08g079870.3.1;Solyc10g085500.2.1;Solyc10g083500.2.1;Solyc09g007510.3.1;Solyc07g150104.1.1;Solyc08g068770.3.1;Solyc08g016720.1.1;…
GO:0016740	transferase activity	MOLECULAR_FUNCTION	0.000304994	2.82533e-07	874	182	4840	874	34694	Solyc11g010600.2.1;Solyc10g075040.3.1;Solyc08g082060.3.1;Solyc12g098490.2.1;Solyc08g068700.1.1;Solyc02g014030.3.1;Solyc02g076800.1.1;Solyc09g064480.1.1;Solyc11g065220.2.1;Solyc03g117490.5.1;Solyc06g063240.3.1;Solyc05g009010.1.1;Solyc10g083500.2.1;Solyc10g005630.3.1;Solyc12g009920.1.1;Solyc09g007510.3.1;Solyc03g082870.4.1;Solyc05g007050.4.1;Solyc08g068770.3.1;Solyc10g005200.3.1;Solyc12g096870.1.1;…
GO:0005975	carbohydrate metabolic process	BIOLOGICAL_PROCESS	0.000314246	3.27491e-07	874	58	1068	874	34694	Solyc06g083580.4.1;Solyc11g010600.2.1;Solyc10g078510.3.1;Solyc04g007910.3.1;Solyc06g007980.4.1;Solyc01g106580.4.1;Solyc04g071650.4.1;Solyc12g056580.2.1;Solyc04g014800.3.1;Solyc04g054930.3.1;Solyc02g067060.3.1;Solyc11g065220.2.1;Solyc03g117490.5.1;Solyc04g016330.3.1;Solyc06g063240.3.1;Solyc03g071570.3.1;Solyc06g069470.3.1;Solyc12g095760.2.1;Solyc07g049610.1.1;Solyc07g062140.3.1;Solyc10g079470.3.1;…
GO:0006468	protein phosphorylation	BIOLOGICAL_PROCESS	0.000401594	4.65023e-07	874	69	1376	874	34694	Solyc10g075040.3.1;Solyc03g119140.4.1;Solyc05g007120.4.1;Solyc02g091860.3.1;Solyc02g014030.3.1;Solyc07g005970.3.1;Solyc01g006520.3.1;Solyc07g066230.4.1;Solyc04g075000.1.1;Solyc05g009010.1.1;Solyc10g083500.2.1;Solyc10g005630.3.1;Solyc09g007510.3.1;Solyc05g007050.4.1;Solyc02g089090.3.1;Solyc03g121440.4.1;Solyc02g090430.3.1;Solyc06g065260.3.1;Solyc01g103430.4.1;Solyc05g006050.3.1;Solyc02g090680.3.1;…
GO:0008194	UDP-glycosyltransferase activity	MOLECULAR_FUNCTION	0.000539184	6.86779e-07	874	29	379	874	34694	Solyc01g112220.4.1;Solyc11g013490.2.1;Solyc06g076550.5.1;Solyc10g079930.1.1;Solyc06g007980.4.1;Solyc04g071650.4.1;Solyc12g056580.2.1;Solyc12g056800.2.1;Solyc02g067690.3.1;Solyc11g066680.1.1;Solyc07g051820.3.1;Solyc02g067060.3.1;Solyc03g005450.3.1;Solyc12g009920.1.1;Solyc11g010810.1.1;Solyc07g062140.3.1;Solyc12g096870.1.1;Solyc11g007500.3.1;Solyc01g006670.2.1;Solyc04g016220.5.1;Solyc01g087210.3.1;…
GO:0098796	membrane protein complex	CELLULAR_COMPONENT	0.000749849	1.04194e-06	874	2	761	874	34694	Solyc07g053980.3.1;Solyc02g069680.3.1
GO:0016757	glycosyltransferase activity	MOLECULAR_FUNCTION	0.000983091	1.47987e-06	874	42	704	874	34694	Solyc01g112220.4.1;Solyc11g013490.2.1;Solyc06g076550.5.1;Solyc10g079930.1.1;Solyc06g007980.4.1;Solyc04g071650.4.1;Solyc08g041770.3.1;Solyc12g056580.2.1;Solyc12g056800.2.1;Solyc02g067690.3.1;Solyc11g066680.1.1;Solyc09g064480.1.1;Solyc07g051820.3.1;Solyc02g067060.3.1;Solyc05g009820.5.1;Solyc01g095300.3.1;Solyc03g005450.3.1;Solyc12g009920.1.1;Solyc11g010810.1.1;Solyc07g049610.1.1;Solyc07g062140.3.1;…
GO:0031225	anchored component of membrane	CELLULAR_COMPONENT	0.00145859	2.36455e-06	874	17	158	874	34694	Solyc07g150104.1.1;Solyc10g078510.3.1;Solyc07g065540.1.1;Solyc04g007910.3.1;Solyc10g150145.2.1;Solyc10g005960.1.1;Solyc01g005985.2.1;Solyc07g008150.3.1;Solyc01g112080.3.1;Solyc07g045440.1.1;Solyc08g074390.3.1;Solyc12g055840.2.1;Solyc01g091530.5.1;Solyc02g065765.1.1;Solyc03g112880.1.1;Solyc01g109570.4.1;Solyc06g054070.3.1
GO:0016773	phosphotransferase activity, alcohol group as acceptor	MOLECULAR_FUNCTION	0.00152026	2.64055e-06	874	70	1477	874	34694	Solyc10g075040.3.1;Solyc03g119140.4.1;Solyc05g007120.4.1;Solyc02g091860.3.1;Solyc02g014030.3.1;Solyc01g006520.3.1;Solyc07g066230.4.1;Solyc11g065220.2.1;Solyc03g117490.5.1;Solyc04g075000.1.1;Solyc05g009010.1.1;Solyc10g083500.2.1;Solyc10g005630.3.1;Solyc09g007510.3.1;Solyc12g095760.2.1;Solyc05g007050.4.1;Solyc02g089090.3.1;Solyc03g121440.4.1;Solyc02g090430.3.1;Solyc06g065260.3.1;Solyc01g103430.4.1;…
GO:0004672	protein kinase activity	MOLECULAR_FUNCTION	0.00208073	3.85498e-06	874	64	1314	874	34694	Solyc10g075040.3.1;Solyc03g119140.4.1;Solyc05g007120.4.1;Solyc02g091860.3.1;Solyc02g014030.3.1;Solyc01g006520.3.1;Solyc07g066230.4.1;Solyc04g075000.1.1;Solyc05g009010.1.1;Solyc10g083500.2.1;Solyc10g005630.3.1;Solyc09g007510.3.1;Solyc05g007050.4.1;Solyc02g089090.3.1;Solyc03g121440.4.1;Solyc02g090430.3.1;Solyc06g065260.3.1;Solyc01g103430.4.1;Solyc02g079540.2.1;Solyc12g008400.2.1;Solyc03g114210.3.1;…
GO:0046658	anchored component of plasma membrane	CELLULAR_COMPONENT	0.00214908	4.23047e-06	874	15	130	874	34694	Solyc07g150104.1.1;Solyc10g078510.3.1;Solyc07g065540.1.1;Solyc04g007910.3.1;Solyc10g150145.2.1;Solyc10g005960.1.1;Solyc07g008150.3.1;Solyc01g112080.3.1;Solyc07g045440.1.1;Solyc08g074390.3.1;Solyc12g055840.2.1;Solyc01g091530.5.1;Solyc02g065765.1.1;Solyc03g112880.1.1;Solyc01g109570.4.1
GO:0016051	carbohydrate biosynthetic process	BIOLOGICAL_PROCESS	0.00642305	1.33875e-05	874	21	264	874	34694	Solyc01g112220.4.1;Solyc07g049610.1.1;Solyc07g062140.3.1;Solyc03g006430.3.1;Solyc01g098390.3.1;Solyc10g079470.3.1;Solyc07g056140.3.1;Solyc04g071650.4.1;Solyc12g056580.2.1;Solyc04g014800.3.1;Solyc04g054930.3.1;Solyc01g087210.3.1;Solyc01g079470.5.1;Solyc02g092840.1.1;Solyc07g051820.3.1;Solyc04g054480.3.1;Solyc02g067060.3.1;Solyc02g065765.1.1;Solyc08g061100.3.1;Solyc03g005450.3.1;Solyc07g053980.3.1
GO:0051273	beta-glucan metabolic process	BIOLOGICAL_PROCESS	0.0126136	2.77512e-05	874	11	84	874	34694	Solyc07g051820.3.1;Solyc04g054480.3.1;Solyc05g005080.3.1;Solyc02g065765.1.1;Solyc11g008820.2.1;Solyc08g061100.3.1;Solyc04g071650.4.1;Solyc12g056580.2.1;Solyc03g005450.3.1;Solyc01g087210.3.1;Solyc07g053980.3.1
GO:0005739	mitochondrion	CELLULAR_COMPONENT	0.0127888	2.96173e-05	874	11	1235	874	34694	Solyc10g012217.1.1;Solyc10g079470.3.1;Solyc11g065220.2.1;Solyc03g117490.5.1;Solyc10g047370.2.1;Solyc01g087070.4.1;Solyc01g079320.5.1;Solyc05g052100.3.1;Solyc03g114150.3.1;Solyc01g008290.3.1;Solyc09g011340.3.1
GO:0000281	mitotic cytokinesis	BIOLOGICAL_PROCESS	0.0131364	3.34646e-05	874	7	30	874	34694	Solyc07g051820.3.1;Solyc08g061100.3.1;Solyc04g071650.4.1;Solyc12g056580.2.1;Solyc03g005450.3.1;Solyc08g013940.3.1;Solyc01g087210.3.1
GO:0045229	external encapsulating structure organization	BIOLOGICAL_PROCESS	0.0131364	3.32275e-05	874	21	282	874	34694	Solyc05g005540.5.1;Solyc03g006430.3.1;Solyc01g087850.2.1;Solyc07g062543.2.1;Solyc02g088100.3.1;Solyc07g017600.3.1;Solyc04g071650.4.1;Solyc12g056580.2.1;Solyc12g098340.2.1;Solyc01g087210.3.1;Solyc08g005800.4.1;Solyc02g067060.3.1;Solyc03g083360.3.1;Solyc04g005050.1.1;Solyc02g065765.1.1;Solyc08g061100.3.1;Solyc01g102350.3.1;Solyc07g052980.3.1;Solyc09g010860.5.1;Solyc10g085400.3.1;Solyc07g053980.3.1
GO:0009579	thylakoid	CELLULAR_COMPONENT	0.0134501	3.89361e-05	874	2	607	874	34694	Solyc10g086150.2.1;Solyc08g061610.5.1
GO:0071555	cell wall organization	BIOLOGICAL_PROCESS	0.0134501	3.6716e-05	874	20	262	874	34694	Solyc05g005540.5.1;Solyc03g006430.3.1;Solyc01g087850.2.1;Solyc07g062543.2.1;Solyc02g088100.3.1;Solyc07g017600.3.1;Solyc04g071650.4.1;Solyc12g056580.2.1;Solyc12g098340.2.1;Solyc01g087210.3.1;Solyc08g005800.4.1;Solyc02g067060.3.1;Solyc03g083360.3.1;Solyc02g065765.1.1;Solyc08g061100.3.1;Solyc01g102350.3.1;Solyc07g052980.3.1;Solyc09g010860.5.1;Solyc10g085400.3.1;Solyc07g053980.3.1
GO:0031226	intrinsic component of plasma membrane	CELLULAR_COMPONENT	0.0134501	3.85359e-05	874	18	220	874	34694	Solyc07g150104.1.1;Solyc10g078510.3.1;Solyc07g065540.1.1;Solyc04g007910.3.1;Solyc10g150145.2.1;Solyc06g009330.3.1;Solyc04g076780.5.1;Solyc10g005960.1.1;Solyc07g008150.3.1;Solyc01g112080.3.1;Solyc07g045440.1.1;Solyc08g074390.3.1;Solyc12g055840.2.1;Solyc01g091530.5.1;Solyc02g065765.1.1;Solyc03g112880.1.1;Solyc06g009290.4.1;Solyc01g109570.4.1
GO:0030243	cellulose metabolic process	BIOLOGICAL_PROCESS	0.0150205	4.52214e-05	874	10	73	874	34694	Solyc07g051820.3.1;Solyc04g054480.3.1;Solyc05g005080.3.1;Solyc02g065765.1.1;Solyc11g008820.2.1;Solyc08g061100.3.1;Solyc04g071650.4.1;Solyc12g056580.2.1;Solyc03g005450.3.1;Solyc01g087210.3.1
GO:0050896	response to stimulus	BIOLOGICAL_PROCESS	0.0160512	5.01831e-05	874	143	3939	874	34694	Solyc10g078510.3.1;Solyc06g050500.2.1;Solyc11g072480.2.1;Solyc04g007910.3.1;Solyc07g052380.3.1;Solyc06g069190.4.1;Solyc06g069850.3.1;Solyc11g010120.2.1;Solyc07g009180.1.1;Solyc06g075360.3.1;Solyc08g079870.3.1;Solyc05g013460.4.1;Solyc10g005630.3.1;Solyc07g052400.3.1;Solyc08g065870.4.1;Solyc09g007510.3.1;Solyc02g093930.4.1;Solyc05g009550.3.1;Solyc08g016720.1.1;Solyc03g114690.4.1;Solyc12g008400.2.1;…
GO:0009250	glucan biosynthetic process	BIOLOGICAL_PROCESS	0.0163713	5.30797e-05	874	12	108	874	34694	Solyc07g049610.1.1;Solyc02g092840.1.1;Solyc07g051820.3.1;Solyc04g054480.3.1;Solyc07g056140.3.1;Solyc02g065765.1.1;Solyc08g061100.3.1;Solyc04g071650.4.1;Solyc12g056580.2.1;Solyc03g005450.3.1;Solyc01g087210.3.1;Solyc07g053980.3.1
GO:0005102	signaling receptor binding	MOLECULAR_FUNCTION	0.0175221	6.15205e-05	874	10	76	874	34694	Solyc04g072570.3.1;Solyc06g065260.3.1;Solyc09g098290.3.1;Solyc04g051510.1.1;Solyc02g091860.3.1;Solyc12g008400.2.1;Solyc03g112580.3.1;Solyc09g009130.4.1;Solyc11g020280.2.1;Solyc06g048950.3.1
GO:0010087	phloem or xylem histogenesis	BIOLOGICAL_PROCESS	0.0175221	6.69558e-05	874	7	34	874	34694	Solyc07g063230.3.1;Solyc06g073110.3.1;Solyc12g005820.3.1;Solyc12g014320.2.1;Solyc09g082580.5.1;Solyc01g104900.3.1;Solyc01g090240.3.1
GO:0009536	plastid	CELLULAR_COMPONENT	0.0175221	6.53406e-05	874	28	2124	874	34694	Solyc10g086150.2.1;Solyc10g005690.3.1;Solyc09g011340.3.1;Solyc01g079470.5.1;Solyc00g500131.1.1;Solyc00g500330.1.1;Solyc00g500191.2.1;Solyc00g500125.1.1;Solyc00g500201.1.1;Solyc00g500126.1.1;Solyc03g123830.5.1;Solyc08g016720.1.1;Solyc10g079470.3.1;Solyc08g065970.3.1;Solyc07g056140.3.1;Solyc02g014860.3.1;Solyc09g031940.1.1;Solyc07g062530.3.1;Solyc08g061610.5.1;Solyc00g500278.1.1;Solyc00g500324.1.1;…
GO:0044238	primary metabolic process	BIOLOGICAL_PROCESS	0.0175221	6.3991e-05	874	348	11255	874	34694	Solyc11g010600.2.1;Solyc02g014030.3.1;Solyc05g054120.1.1;Solyc09g064480.1.1;Solyc03g117490.5.1;Solyc00g500201.1.1;Solyc03g007170.3.1;Solyc04g005050.1.1;Solyc05g009010.1.1;Solyc08g079870.3.1;Solyc10g083500.2.1;Solyc09g007510.3.1;Solyc02g093930.4.1;Solyc08g016720.1.1;Solyc05g006050.3.1;Solyc03g114690.4.1;Solyc07g007120.3.1;Solyc12g098340.2.1;Solyc12g008400.2.1;Solyc04g081440.3.1;Solyc03g114720.3.1;…
GO:0044262	cellular carbohydrate metabolic process	BIOLOGICAL_PROCESS	0.0175221	6.03869e-05	874	26	405	874	34694	Solyc11g008820.2.1;Solyc04g071650.4.1;Solyc12g056580.2.1;Solyc04g014800.3.1;Solyc04g054930.3.1;Solyc12g014570.2.1;Solyc07g051820.3.1;Solyc11g065220.2.1;Solyc03g117490.5.1;Solyc03g005450.3.1;Solyc06g069470.3.1;Solyc12g095760.2.1;Solyc07g049610.1.1;Solyc07g062140.3.1;Solyc03g006430.3.1;Solyc05g005080.3.1;Solyc07g056140.3.1;Solyc04g081440.3.1;Solyc01g087210.3.1;Solyc02g092840.1.1;Solyc04g054480.3.1;…
GO:0051274	beta-glucan biosynthetic process	BIOLOGICAL_PROCESS	0.0183494	7.22416e-05	874	9	62	874	34694	Solyc07g051820.3.1;Solyc04g054480.3.1;Solyc02g065765.1.1;Solyc08g061100.3.1;Solyc04g071650.4.1;Solyc12g056580.2.1;Solyc03g005450.3.1;Solyc01g087210.3.1;Solyc07g053980.3.1
GO:0016310	phosphorylation	BIOLOGICAL_PROCESS	0.0187695	7.6069e-05	874	78	1883	874	34694	Solyc10g075040.3.1;Solyc03g119140.4.1;Solyc05g007120.4.1;Solyc02g091860.3.1;Solyc02g014030.3.1;Solyc07g005970.3.1;Solyc02g076800.1.1;Solyc01g006520.3.1;Solyc07g066230.4.1;Solyc11g065220.2.1;Solyc03g117490.5.1;Solyc04g075000.1.1;Solyc05g009010.1.1;Solyc10g083500.2.1;Solyc10g005630.3.1;Solyc09g007510.3.1;Solyc12g095760.2.1;Solyc05g007050.4.1;Solyc02g089090.3.1;Solyc03g121440.4.1;Solyc02g090430.3.1;…
GO:0009755	hormone-mediated signaling pathway	BIOLOGICAL_PROCESS	0.019126	7.97286e-05	874	30	516	874	34694	Solyc12g008420.3.1;Solyc01g098390.3.1;Solyc06g050500.2.1;Solyc02g037530.3.1;Solyc11g072480.2.1;Solyc05g052030.1.1;Solyc04g079560.3.1;Solyc01g103050.3.1;Solyc01g005440.4.1;Solyc10g085000.2.1;Solyc06g068390.1.1;Solyc06g075360.3.1;Solyc09g082580.5.1;Solyc03g112880.1.1;Solyc04g051510.1.1;Solyc12g040800.2.1;Solyc10g080610.1.1;Solyc09g008240.3.1;Solyc06g061180.2.1;Solyc02g077370.1.1;Solyc06g082590.1.1;…
GO:0071704	organic substance metabolic process	BIOLOGICAL_PROCESS	0.0193608	8.29493e-05	874	369	12056	874	34694	Solyc11g010600.2.1;Solyc02g014030.3.1;Solyc11g010120.2.1;Solyc05g054120.1.1;Solyc09g064480.1.1;Solyc03g117490.5.1;Solyc00g500201.1.1;Solyc04g010250.3.1;Solyc03g007170.3.1;Solyc04g005050.1.1;Solyc05g009010.1.1;Solyc08g079870.3.1;Solyc10g083500.2.1;Solyc09g007510.3.1;Solyc02g093930.4.1;Solyc08g016720.1.1;Solyc05g006050.3.1;Solyc03g114690.4.1;Solyc07g007120.3.1;Solyc12g098340.2.1;Solyc12g008400.2.1;…
GO:0000271	polysaccharide biosynthetic process	BIOLOGICAL_PROCESS	0.019803	9.15886e-05	874	15	173	874	34694	Solyc01g112220.4.1;Solyc07g049610.1.1;Solyc03g006430.3.1;Solyc07g056140.3.1;Solyc04g071650.4.1;Solyc12g056580.2.1;Solyc01g087210.3.1;Solyc02g092840.1.1;Solyc07g051820.3.1;Solyc04g054480.3.1;Solyc02g067060.3.1;Solyc02g065765.1.1;Solyc08g061100.3.1;Solyc03g005450.3.1;Solyc07g053980.3.1
GO:0016301	kinase activity	MOLECULAR_FUNCTION	0.019803	9.04515e-05	874	74	1773	874	34694	Solyc02g087580.3.1;Solyc10g075040.3.1;Solyc03g119140.4.1;Solyc05g007120.4.1;Solyc02g091860.3.1;Solyc02g014030.3.1;Solyc02g076800.1.1;Solyc01g006520.3.1;Solyc07g066230.4.1;Solyc11g065220.2.1;Solyc03g117490.5.1;Solyc04g075000.1.1;Solyc05g009010.1.1;Solyc10g083500.2.1;Solyc10g005630.3.1;Solyc09g007510.3.1;Solyc12g095760.2.1;Solyc05g007050.4.1;Solyc02g089090.3.1;Solyc03g121440.4.1;Solyc02g090430.3.1;…
GO:0005976	polysaccharide metabolic process	BIOLOGICAL_PROCESS	0.019803	9.17228e-05	874	26	421	874	34694	Solyc01g112220.4.1;Solyc06g083580.4.1;Solyc07g017600.3.1;Solyc11g008820.2.1;Solyc01g106580.4.1;Solyc04g071650.4.1;Solyc12g056580.2.1;Solyc07g051820.3.1;Solyc02g067060.3.1;Solyc03g071570.3.1;Solyc03g005450.3.1;Solyc07g049610.1.1;Solyc03g006430.3.1;Solyc05g005080.3.1;Solyc01g087850.2.1;Solyc07g056140.3.1;Solyc12g098340.2.1;Solyc01g087210.3.1;Solyc02g092840.1.1;Solyc04g054480.3.1;Solyc03g083360.3.1;…
GO:0032870	cellular response to hormone stimulus	BIOLOGICAL_PROCESS	0.0200126	9.50113e-05	874	30	523	874	34694	Solyc12g008420.3.1;Solyc01g098390.3.1;Solyc06g050500.2.1;Solyc02g037530.3.1;Solyc11g072480.2.1;Solyc05g052030.1.1;Solyc04g079560.3.1;Solyc01g103050.3.1;Solyc01g005440.4.1;Solyc10g085000.2.1;Solyc06g068390.1.1;Solyc06g075360.3.1;Solyc09g082580.5.1;Solyc03g112880.1.1;Solyc04g051510.1.1;Solyc12g040800.2.1;Solyc10g080610.1.1;Solyc09g008240.3.1;Solyc06g061180.2.1;Solyc02g077370.1.1;Solyc06g082590.1.1;…
GO:0032991	protein-containing complex	CELLULAR_COMPONENT	0.0205547	0.000106377	874	51	3235	874	34694	Solyc01g080200.3.1;Solyc08g061650.4.1;Solyc01g102810.3.1;Solyc07g005970.3.1;Solyc02g094320.3.1;Solyc09g014400.3.1;Solyc04g016330.3.1;Solyc02g093930.4.1;Solyc07g047670.3.1;Solyc03g096250.3.1;Solyc05g006050.3.1;Solyc01g079490.2.1;Solyc01g099290.3.1;Solyc07g018340.3.1;Solyc08g023280.4.1;Solyc01g020440.3.1;Solyc08g066330.3.1;Solyc06g062500.4.1;Solyc11g008670.2.1;Solyc07g053980.3.1;Solyc02g069680.3.1;…
GO:0030244	cellulose biosynthetic process	BIOLOGICAL_PROCESS	0.0205547	0.000111866	874	8	51	874	34694	Solyc07g051820.3.1;Solyc04g054480.3.1;Solyc02g065765.1.1;Solyc08g061100.3.1;Solyc04g071650.4.1;Solyc12g056580.2.1;Solyc03g005450.3.1;Solyc01g087210.3.1
GO:0061640	cytoskeleton-dependent cytokinesis	BIOLOGICAL_PROCESS	0.0205547	0.00010689	874	7	37	874	34694	Solyc07g051820.3.1;Solyc08g061100.3.1;Solyc04g071650.4.1;Solyc12g056580.2.1;Solyc03g005450.3.1;Solyc08g013940.3.1;Solyc01g087210.3.1
GO:0009833	plant-type primary cell wall biogenesis	BIOLOGICAL_PROCESS	0.0205547	0.000107938	874	6	25	874	34694	Solyc08g061100.3.1;Solyc04g071650.4.1;Solyc07g051820.3.1;Solyc12g056580.2.1;Solyc03g005450.3.1;Solyc01g087210.3.1
GO:0071495	cellular response to endogenous stimulus	BIOLOGICAL_PROCESS	0.0205547	0.000111379	874	30	529	874	34694	Solyc12g008420.3.1;Solyc01g098390.3.1;Solyc06g050500.2.1;Solyc02g037530.3.1;Solyc11g072480.2.1;Solyc05g052030.1.1;Solyc04g079560.3.1;Solyc01g103050.3.1;Solyc01g005440.4.1;Solyc10g085000.2.1;Solyc06g068390.1.1;Solyc06g075360.3.1;Solyc09g082580.5.1;Solyc03g112880.1.1;Solyc04g051510.1.1;Solyc12g040800.2.1;Solyc10g080610.1.1;Solyc09g008240.3.1;Solyc06g061180.2.1;Solyc02g077370.1.1;Solyc06g082590.1.1;…
GO:0033612	receptor serine/threonine kinase binding	MOLECULAR_FUNCTION	0.0205547	0.000111866	874	8	51	874	34694	Solyc06g065260.3.1;Solyc09g098290.3.1;Solyc04g051510.1.1;Solyc02g091860.3.1;Solyc12g008400.2.1;Solyc03g112580.3.1;Solyc11g020280.2.1;Solyc06g048950.3.1
GO:0050794	regulation of cellular process	BIOLOGICAL_PROCESS	0.024168	0.000134329	874	142	3993	874	34694	Solyc10g084180.2.1;Solyc06g050500.2.1;Solyc11g010270.2.1;Solyc11g068950.3.1;Solyc05g055480.3.1;Solyc11g072480.2.1;Solyc05g054120.1.1;Solyc11g069890.4.1;Solyc06g075360.3.1;Solyc07g052400.3.1;Solyc09g007510.3.1;Solyc05g006050.3.1;Solyc08g008410.3.1;Solyc03g114690.4.1;Solyc07g007120.3.1;Solyc12g008400.2.1;Solyc06g083150.3.1;Solyc03g114720.3.1;Solyc12g005380.3.1;Solyc02g093150.3.1;Solyc05g052780.4.1;…
GO:0038023	signaling receptor activity	MOLECULAR_FUNCTION	0.0249251	0.000141423	874	13	140	874	34694	Solyc04g072570.3.1;Solyc06g061180.2.1;Solyc06g050500.2.1;Solyc02g083670.4.1;Solyc10g084250.1.1;Solyc02g078170.4.1;Solyc06g063170.3.1;Solyc12g099250.2.1;Solyc06g063180.4.1;Solyc07g052400.3.1;Solyc02g071260.3.1;Solyc07g007800.3.1;Solyc09g007510.3.1
GO:0065007	biological regulation	BIOLOGICAL_PROCESS	0.0324139	0.000187667	874	173	5084	874	34694	Solyc10g084180.2.1;Solyc06g050500.2.1;Solyc11g010270.2.1;Solyc11g068950.3.1;Solyc05g055480.3.1;Solyc11g072480.2.1;Solyc06g009330.3.1;Solyc05g054120.1.1;Solyc11g069890.4.1;Solyc11g065220.2.1;Solyc06g075360.3.1;Solyc07g052400.3.1;Solyc08g065870.4.1;Solyc09g007510.3.1;Solyc05g006050.3.1;Solyc01g102400.3.1;Solyc08g008410.3.1;Solyc03g114690.4.1;Solyc07g007120.3.1;Solyc12g008400.2.1;Solyc06g083150.3.1;…
GO:0000278	mitotic cell cycle	BIOLOGICAL_PROCESS	0.0390718	0.000240056	874	18	257	874	34694	Solyc02g093930.4.1;Solyc10g085020.3.1;Solyc05g006050.3.1;Solyc04g081490.3.1;Solyc03g114690.4.1;Solyc04g071650.4.1;Solyc12g056580.2.1;Solyc08g013940.3.1;Solyc01g087210.3.1;Solyc07g051820.3.1;Solyc08g066330.3.1;Solyc12g014320.2.1;Solyc07g043320.3.1;Solyc08g061100.3.1;Solyc08g006890.3.1;Solyc03g005450.3.1;Solyc02g087980.3.1;Solyc04g077020.3.1
GO:0060089	molecular transducer activity	MOLECULAR_FUNCTION	0.0390718	0.000249288	874	13	149	874	34694	Solyc04g072570.3.1;Solyc06g061180.2.1;Solyc06g050500.2.1;Solyc02g083670.4.1;Solyc10g084250.1.1;Solyc02g078170.4.1;Solyc06g063170.3.1;Solyc12g099250.2.1;Solyc06g063180.4.1;Solyc07g052400.3.1;Solyc02g071260.3.1;Solyc07g007800.3.1;Solyc09g007510.3.1
GO:0071365	cellular response to auxin stimulus	BIOLOGICAL_PROCESS	0.0390718	0.000265197	874	12	130	874	34694	Solyc06g053840.3.1;Solyc09g008240.3.1;Solyc02g037530.3.1;Solyc11g072480.2.1;Solyc06g075360.3.1;Solyc04g079560.3.1;Solyc09g082580.5.1;Solyc01g103050.3.1;Solyc05g008060.4.1;Solyc03g120390.3.1;Solyc07g016180.3.1;Solyc05g056040.3.1
GO:0008080	N-acetyltransferase activity	MOLECULAR_FUNCTION	0.0390718	0.000243878	874	9	74	874	34694	Solyc08g068770.3.1;Solyc06g066790.3.1;Solyc09g082230.1.1;Solyc09g082260.1.1;Solyc02g089790.4.1;Solyc09g082220.1.1;Solyc08g068700.1.1;Solyc09g082250.3.1;Solyc08g068690.1.1
GO:0009734	auxin-activated signaling pathway	BIOLOGICAL_PROCESS	0.0390718	0.000265197	874	12	130	874	34694	Solyc06g053840.3.1;Solyc09g008240.3.1;Solyc02g037530.3.1;Solyc11g072480.2.1;Solyc06g075360.3.1;Solyc04g079560.3.1;Solyc09g082580.5.1;Solyc01g103050.3.1;Solyc05g008060.4.1;Solyc03g120390.3.1;Solyc07g016180.3.1;Solyc05g056040.3.1
GO:0034637	cellular carbohydrate biosynthetic process	BIOLOGICAL_PROCESS	0.0390718	0.000237922	874	15	190	874	34694	Solyc07g049610.1.1;Solyc07g062140.3.1;Solyc07g056140.3.1;Solyc04g071650.4.1;Solyc12g056580.2.1;Solyc04g014800.3.1;Solyc04g054930.3.1;Solyc01g087210.3.1;Solyc02g092840.1.1;Solyc07g051820.3.1;Solyc04g054480.3.1;Solyc02g065765.1.1;Solyc08g061100.3.1;Solyc03g005450.3.1;Solyc07g053980.3.1
GO:0007165	signal transduction	BIOLOGICAL_PROCESS	0.0390718	0.000266933	874	54	1233	874	34694	Solyc03g081240.3.1;Solyc06g050500.2.1;Solyc11g072480.2.1;Solyc05g052030.1.1;Solyc04g014800.3.1;Solyc06g068390.1.1;Solyc06g075360.3.1;Solyc03g112880.1.1;Solyc12g040800.2.1;Solyc07g052400.3.1;Solyc09g007510.3.1;Solyc01g103430.4.1;Solyc02g077370.1.1;Solyc12g008400.2.1;Solyc12g005380.3.1;Solyc02g093150.3.1;Solyc07g016180.3.1;Solyc05g052780.4.1;Solyc10g084250.1.1;Solyc05g056040.3.1;Solyc06g053840.3.1;…
GO:0016760	cellulose synthase (UDP-forming) activity	MOLECULAR_FUNCTION	0.0390718	0.000256554	874	6	30	874	34694	Solyc08g061100.3.1;Solyc04g071650.4.1;Solyc07g051820.3.1;Solyc12g056580.2.1;Solyc03g005450.3.1;Solyc01g087210.3.1
GO:0006073	cellular glucan metabolic process	BIOLOGICAL_PROCESS	0.0390718	0.000264181	874	15	192	874	34694	Solyc07g049610.1.1;Solyc05g005080.3.1;Solyc07g056140.3.1;Solyc11g008820.2.1;Solyc04g071650.4.1;Solyc12g056580.2.1;Solyc01g087210.3.1;Solyc02g092840.1.1;Solyc07g051820.3.1;Solyc04g054480.3.1;Solyc02g065765.1.1;Solyc08g061100.3.1;Solyc03g005450.3.1;Solyc07g052980.3.1;Solyc07g053980.3.1
GO:0000910	cytokinesis	BIOLOGICAL_PROCESS	0.039689	0.000275745	874	8	59	874	34694	Solyc07g051820.3.1;Solyc12g014490.3.1;Solyc08g061100.3.1;Solyc04g071650.4.1;Solyc12g056580.2.1;Solyc03g005450.3.1;Solyc08g013940.3.1;Solyc01g087210.3.1
GO:0016759	cellulose synthase activity	MOLECULAR_FUNCTION	0.0419306	0.000299732	874	6	31	874	34694	Solyc08g061100.3.1;Solyc04g071650.4.1;Solyc07g051820.3.1;Solyc12g056580.2.1;Solyc03g005450.3.1;Solyc01g087210.3.1
GO:0008889	glycerophosphodiester phosphodiesterase activity	MOLECULAR_FUNCTION	0.0419306	0.00030103	874	3	3	874	34694	Solyc06g069470.3.1;Solyc12g014570.2.1;Solyc01g009870.3.1
GO:0071310	cellular response to organic substance	BIOLOGICAL_PROCESS	0.04288	0.000312811	874	32	613	874	34694	Solyc12g008420.3.1;Solyc01g098390.3.1;Solyc06g050500.2.1;Solyc02g037530.3.1;Solyc11g072480.2.1;Solyc05g052030.1.1;Solyc04g079560.3.1;Solyc01g103050.3.1;Solyc01g005440.4.1;Solyc10g085000.2.1;Solyc06g068390.1.1;Solyc06g075360.3.1;Solyc09g082580.5.1;Solyc03g112880.1.1;Solyc04g051510.1.1;Solyc12g040800.2.1;Solyc10g080610.1.1;Solyc09g008240.3.1;Solyc06g061180.2.1;Solyc02g077370.1.1;Solyc06g082590.1.1;…
GO:0019400	alditol metabolic process	BIOLOGICAL_PROCESS	0.0434777	0.000327241	874	4	10	874	34694	Solyc12g014570.2.1;Solyc03g117490.5.1;Solyc06g069470.3.1;Solyc01g009870.3.1
GO:0006071	glycerol metabolic process	BIOLOGICAL_PROCESS	0.0434777	0.000327241	874	4	10	874	34694	Solyc12g014570.2.1;Solyc03g117490.5.1;Solyc06g069470.3.1;Solyc01g009870.3.1
GO:0050789	regulation of biological process	BIOLOGICAL_PROCESS	0.0448644	0.000342873	874	154	4490	874	34694	Solyc10g084180.2.1;Solyc06g050500.2.1;Solyc11g010270.2.1;Solyc11g068950.3.1;Solyc05g055480.3.1;Solyc11g072480.2.1;Solyc05g054120.1.1;Solyc11g069890.4.1;Solyc06g075360.3.1;Solyc07g052400.3.1;Solyc08g065870.4.1;Solyc09g007510.3.1;Solyc05g006050.3.1;Solyc01g102400.3.1;Solyc08g008410.3.1;Solyc03g114690.4.1;Solyc07g007120.3.1;Solyc12g008400.2.1;Solyc06g083150.3.1;Solyc03g114720.3.1;Solyc12g005380.3.1;…
GO:0008081	phosphoric diester hydrolase activity	MOLECULAR_FUNCTION	0.0455533	0.000353413	874	7	46	874	34694	Solyc12g014570.2.1;Solyc08g080130.3.1;Solyc01g009870.3.1;Solyc10g076710.3.1;Solyc01g111260.2.1;Solyc06g069470.3.1;Solyc05g052780.4.1
GO:0023052	signaling	BIOLOGICAL_PROCESS	0.0479315	0.000382964	874	54	1243	874	34694	Solyc03g081240.3.1;Solyc06g050500.2.1;Solyc11g072480.2.1;Solyc05g052030.1.1;Solyc04g014800.3.1;Solyc06g068390.1.1;Solyc06g075360.3.1;Solyc03g112880.1.1;Solyc12g040800.2.1;Solyc07g052400.3.1;Solyc09g007510.3.1;Solyc01g103430.4.1;Solyc02g077370.1.1;Solyc12g008400.2.1;Solyc12g005380.3.1;Solyc02g093150.3.1;Solyc07g016180.3.1;Solyc05g052780.4.1;Solyc10g084250.1.1;Solyc05g056040.3.1;Solyc06g053840.3.1;…
GO:0016772	transferase activity, transferring phosphorus-containing groups	MOLECULAR_FUNCTION	0.0479315	0.000377788	874	81	2083	874	34694	Solyc02g087580.3.1;Solyc10g075040.3.1;Solyc03g119140.4.1;Solyc05g007120.4.1;Solyc01g102810.3.1;Solyc02g091860.3.1;Solyc02g014030.3.1;Solyc02g076800.1.1;Solyc01g006520.3.1;Solyc07g066230.4.1;Solyc11g065220.2.1;Solyc03g117490.5.1;Solyc04g075000.1.1;Solyc05g009010.1.1;Solyc10g083500.2.1;Solyc10g005630.3.1;Solyc09g007510.3.1;Solyc12g095760.2.1;Solyc05g007050.4.1;Solyc02g089090.3.1;Solyc03g121440.4.1;…

## Sheet: Pericarp Up.slim
GO ID	GO Name	GO Category	FDR	-logFDR	P-Value	Total DEGs	DEGs annotated	Genes annotated	Total genes	Genes
GO:0016021	integral component of membrane	CELLULAR_COMPONENT	3.43986e-11	10.4635	1.59326e-14	874	295	7521	874	34694	Solyc02g093020.3.1;Solyc08g082060.3.1;Solyc03g121620.1.1;Solyc06g009330.3.1;Solyc08g041710.3.1;Solyc08g077730.3.1;Solyc10g007280.4.1;Solyc04g054690.3.1;Solyc09g064480.1.1;Solyc06g075360.3.1;Solyc04g005050.1.1;Solyc05g009010.1.1;Solyc02g036480.1.1;Solyc10g085500.2.1;Solyc05g013460.4.1;Solyc07g052400.3.1;Solyc07g054850.3.1;Solyc09g007510.3.1;Solyc11g069710.2.1;Solyc01g087070.4.1;Solyc12g094650.3.1;…
GO:0006468	protein phosphorylation	BIOLOGICAL_PROCESS	0.000401594	3.39621	4.65023e-07	874	69	1376	874	34694	Solyc10g075040.3.1;Solyc03g119140.4.1;Solyc05g007120.4.1;Solyc02g091860.3.1;Solyc02g014030.3.1;Solyc07g005970.3.1;Solyc01g006520.3.1;Solyc07g066230.4.1;Solyc04g075000.1.1;Solyc05g009010.1.1;Solyc10g083500.2.1;Solyc10g005630.3.1;Solyc09g007510.3.1;Solyc05g007050.4.1;Solyc02g089090.3.1;Solyc03g121440.4.1;Solyc02g090430.3.1;Solyc06g065260.3.1;Solyc01g103430.4.1;Solyc05g006050.3.1;Solyc02g090680.3.1;…
GO:0098796	membrane protein complex	CELLULAR_COMPONENT	0.000749849	3.12503	1.04194e-06	874	2	761	874	34694	Solyc07g053980.3.1;Solyc02g069680.3.1
GO:0004672	protein kinase activity	MOLECULAR_FUNCTION	0.00208073	2.68178	3.85498e-06	874	64	1314	874	34694	Solyc10g075040.3.1;Solyc03g119140.4.1;Solyc05g007120.4.1;Solyc02g091860.3.1;Solyc02g014030.3.1;Solyc01g006520.3.1;Solyc07g066230.4.1;Solyc04g075000.1.1;Solyc05g009010.1.1;Solyc10g083500.2.1;Solyc10g005630.3.1;Solyc09g007510.3.1;Solyc05g007050.4.1;Solyc02g089090.3.1;Solyc03g121440.4.1;Solyc02g090430.3.1;Solyc06g065260.3.1;Solyc01g103430.4.1;Solyc02g079540.2.1;Solyc12g008400.2.1;Solyc03g114210.3.1;…
GO:0046658	anchored component of plasma membrane	CELLULAR_COMPONENT	0.00214908	2.66775	4.23047e-06	874	15	130	874	34694	Solyc07g150104.1.1;Solyc10g078510.3.1;Solyc07g065540.1.1;Solyc04g007910.3.1;Solyc10g150145.2.1;Solyc10g005960.1.1;Solyc07g008150.3.1;Solyc01g112080.3.1;Solyc07g045440.1.1;Solyc08g074390.3.1;Solyc12g055840.2.1;Solyc01g091530.5.1;Solyc02g065765.1.1;Solyc03g112880.1.1;Solyc01g109570.4.1
GO:0005739	mitochondrion	CELLULAR_COMPONENT	0.0127888	1.89317	2.96173e-05	874	11	1235	874	34694	Solyc10g012217.1.1;Solyc10g079470.3.1;Solyc11g065220.2.1;Solyc03g117490.5.1;Solyc10g047370.2.1;Solyc01g087070.4.1;Solyc01g079320.5.1;Solyc05g052100.3.1;Solyc03g114150.3.1;Solyc01g008290.3.1;Solyc09g011340.3.1
GO:0071555	cell wall organization	BIOLOGICAL_PROCESS	0.0134501	1.87127	3.6716e-05	874	20	262	874	34694	Solyc05g005540.5.1;Solyc03g006430.3.1;Solyc01g087850.2.1;Solyc07g062543.2.1;Solyc02g088100.3.1;Solyc07g017600.3.1;Solyc04g071650.4.1;Solyc12g056580.2.1;Solyc12g098340.2.1;Solyc01g087210.3.1;Solyc08g005800.4.1;Solyc02g067060.3.1;Solyc03g083360.3.1;Solyc02g065765.1.1;Solyc08g061100.3.1;Solyc01g102350.3.1;Solyc07g052980.3.1;Solyc09g010860.5.1;Solyc10g085400.3.1;Solyc07g053980.3.1
GO:0009579	thylakoid	CELLULAR_COMPONENT	0.0134501	1.87127	3.89361e-05	874	2	607	874	34694	Solyc10g086150.2.1;Solyc08g061610.5.1
GO:0010087	phloem or xylem histogenesis	BIOLOGICAL_PROCESS	0.0175221	1.75641	6.69558e-05	874	7	34	874	34694	Solyc07g063230.3.1;Solyc06g073110.3.1;Solyc12g005820.3.1;Solyc12g014320.2.1;Solyc09g082580.5.1;Solyc01g104900.3.1;Solyc01g090240.3.1
GO:0009536	plastid	CELLULAR_COMPONENT	0.0175221	1.75641	6.53406e-05	874	28	2124	874	34694	Solyc10g086150.2.1;Solyc10g005690.3.1;Solyc09g011340.3.1;Solyc01g079470.5.1;Solyc00g500131.1.1;Solyc00g500330.1.1;Solyc00g500191.2.1;Solyc00g500125.1.1;Solyc00g500201.1.1;Solyc00g500126.1.1;Solyc03g123830.5.1;Solyc08g016720.1.1;Solyc10g079470.3.1;Solyc08g065970.3.1;Solyc07g056140.3.1;Solyc02g014860.3.1;Solyc09g031940.1.1;Solyc07g062530.3.1;Solyc08g061610.5.1;Solyc00g500278.1.1;Solyc00g500324.1.1;…
GO:0009833	plant-type primary cell wall biogenesis	BIOLOGICAL_PROCESS	0.0205547	1.68709	0.000107938	874	6	25	874	34694	Solyc08g061100.3.1;Solyc04g071650.4.1;Solyc07g051820.3.1;Solyc12g056580.2.1;Solyc03g005450.3.1;Solyc01g087210.3.1
GO:0030244	cellulose biosynthetic process	BIOLOGICAL_PROCESS	0.0205547	1.68709	0.000111866	874	8	51	874	34694	Solyc07g051820.3.1;Solyc04g054480.3.1;Solyc02g065765.1.1;Solyc08g061100.3.1;Solyc04g071650.4.1;Solyc12g056580.2.1;Solyc03g005450.3.1;Solyc01g087210.3.1
GO:0033612	receptor serine/threonine kinase binding	MOLECULAR_FUNCTION	0.0205547	1.68709	0.000111866	874	8	51	874	34694	Solyc06g065260.3.1;Solyc09g098290.3.1;Solyc04g051510.1.1;Solyc02g091860.3.1;Solyc12g008400.2.1;Solyc03g112580.3.1;Solyc11g020280.2.1;Solyc06g048950.3.1
GO:0038023	signaling receptor activity	MOLECULAR_FUNCTION	0.0249251	1.60336	0.000141423	874	13	140	874	34694	Solyc04g072570.3.1;Solyc06g061180.2.1;Solyc06g050500.2.1;Solyc02g083670.4.1;Solyc10g084250.1.1;Solyc02g078170.4.1;Solyc06g063170.3.1;Solyc12g099250.2.1;Solyc06g063180.4.1;Solyc07g052400.3.1;Solyc02g071260.3.1;Solyc07g007800.3.1;Solyc09g007510.3.1
GO:0009734	auxin-activated signaling pathway	BIOLOGICAL_PROCESS	0.0390718	1.40814	0.000265197	874	12	130	874	34694	Solyc06g053840.3.1;Solyc09g008240.3.1;Solyc02g037530.3.1;Solyc11g072480.2.1;Solyc06g075360.3.1;Solyc04g079560.3.1;Solyc09g082580.5.1;Solyc01g103050.3.1;Solyc05g008060.4.1;Solyc03g120390.3.1;Solyc07g016180.3.1;Solyc05g056040.3.1
GO:0016760	cellulose synthase (UDP-forming) activity	MOLECULAR_FUNCTION	0.0390718	1.40814	0.000256554	874	6	30	874	34694	Solyc08g061100.3.1;Solyc04g071650.4.1;Solyc07g051820.3.1;Solyc12g056580.2.1;Solyc03g005450.3.1;Solyc01g087210.3.1
GO:0008080	N-acetyltransferase activity	MOLECULAR_FUNCTION	0.0390718	1.40814	0.000243878	874	9	74	874	34694	Solyc08g068770.3.1;Solyc06g066790.3.1;Solyc09g082230.1.1;Solyc09g082260.1.1;Solyc02g089790.4.1;Solyc09g082220.1.1;Solyc08g068700.1.1;Solyc09g082250.3.1;Solyc08g068690.1.1
GO:0008889	glycerophosphodiester phosphodiesterase activity	MOLECULAR_FUNCTION	0.0419306	1.37747	0.00030103	874	3	3	874	34694	Solyc06g069470.3.1;Solyc12g014570.2.1;Solyc01g009870.3.1
GO:0006071	glycerol metabolic process	BIOLOGICAL_PROCESS	0.0434777	1.36173	0.000327241	874	4	10	874	34694	Solyc12g014570.2.1;Solyc03g117490.5.1;Solyc06g069470.3.1;Solyc01g009870.3.1

## Sheet: Pericarp Down.full
GO ID	GO Name	GO Category	FDR	P-Value	Total DEGs	DEGs annotated	Genes annotated	Total genes	Genes
GO:0009408	response to heat	BIOLOGICAL_PROCESS	4.55047e-20	5.26919e-24	683	29	86	683	34694	Solyc03g115230.3.1;Solyc03g097120.3.1;Solyc06g076520.1.1;Solyc03g118340.3.1;Solyc03g123540.3.1;Solyc03g007890.3.1;Solyc09g015000.4.1;Solyc03g113930.3.1;Solyc02g093600.3.1;Solyc09g005120.3.1;Solyc08g062340.3.1;Solyc12g042830.3.1;Solyc11g071830.2.1;Solyc02g090820.3.1;Solyc01g067910.4.1;Solyc04g014480.3.1;Solyc03g082420.3.1;Solyc06g036290.3.1;Solyc01g104740.3.1;Solyc02g079930.3.1;Solyc06g076560.2.1;…
GO:0009266	response to temperature stimulus	BIOLOGICAL_PROCESS	7.38195e-19	1.70958e-22	683	36	185	683	34694	Solyc03g115230.3.1;Solyc03g097120.3.1;Solyc06g076520.1.1;Solyc03g118340.3.1;Solyc03g123540.3.1;Solyc03g007890.3.1;Solyc09g015000.4.1;Solyc03g113930.3.1;Solyc02g093600.3.1;Solyc05g052950.5.1;Solyc09g011810.3.1;Solyc09g005120.3.1;Solyc02g062390.3.1;Solyc08g062340.3.1;Solyc12g042830.3.1;Solyc11g071830.2.1;Solyc02g090820.3.1;Solyc01g067910.4.1;Solyc04g014480.3.1;Solyc03g082420.3.1;Solyc09g082460.3.1;…
GO:0006457	protein folding	BIOLOGICAL_PROCESS	1.20876e-15	4.19903e-19	683	34	210	683	34694	Solyc06g076520.1.1;Solyc04g011440.4.1;Solyc03g123540.3.1;Solyc03g007890.3.1;Solyc09g015000.4.1;Solyc03g113930.3.1;Solyc09g075950.1.1;Solyc02g077670.3.1;Solyc02g093600.3.1;Solyc11g069790.2.1;Solyc09g092690.3.1;Solyc01g099660.4.1;Solyc08g062340.3.1;Solyc12g042830.3.1;Solyc11g071830.2.1;Solyc11g020040.2.1;Solyc04g014480.3.1;Solyc03g117630.1.1;Solyc06g036290.3.1;Solyc07g053615.2.1;Solyc06g076560.2.1;…
GO:0051082	unfolded protein binding	MOLECULAR_FUNCTION	1.68911e-15	7.82357e-19	683	27	117	683	34694	Solyc06g076520.1.1;Solyc04g011440.4.1;Solyc03g123540.3.1;Solyc03g007890.3.1;Solyc09g015000.4.1;Solyc03g113930.3.1;Solyc09g075950.1.1;Solyc02g077670.3.1;Solyc02g093600.3.1;Solyc01g099660.4.1;Solyc08g062340.3.1;Solyc12g042830.3.1;Solyc11g071830.2.1;Solyc11g020040.2.1;Solyc04g014480.3.1;Solyc03g117630.1.1;Solyc06g036290.3.1;Solyc07g053615.2.1;Solyc06g076560.2.1;Solyc09g015020.1.1;Solyc11g066100.2.1;…
GO:0009628	response to abiotic stimulus	BIOLOGICAL_PROCESS	4.77089e-14	2.76221e-17	683	53	630	683	34694	Solyc03g097120.3.1;Solyc06g076520.1.1;Solyc02g078940.3.1;Solyc03g118340.3.1;Solyc03g123540.3.1;Solyc01g099100.4.1;Solyc11g005190.3.1;Solyc05g052950.5.1;Solyc09g005120.3.1;Solyc04g078920.3.1;Solyc12g042830.3.1;Solyc12g089240.2.1;Solyc02g090820.3.1;Solyc03g082420.3.1;Solyc08g081190.3.1;Solyc06g036290.3.1;Solyc02g079930.3.1;Solyc06g076670.3.1;Solyc07g042250.3.1;Solyc02g084420.3.1;Solyc06g076570.4.1;…
GO:0005737	cytoplasm	CELLULAR_COMPONENT	1.31894e-11	9.16355e-15	683	255	8111	683	34694	Solyc03g118090.3.1;Solyc05g054480.3.1;Solyc03g113990.4.1;Solyc12g006370.3.1;Solyc02g070020.1.1;Solyc01g006540.4.1;Solyc11g065830.2.1;Solyc04g078920.3.1;Solyc03g111730.3.1;Solyc01g106090.3.1;Solyc10g051120.3.1;Solyc06g060570.3.1;Solyc08g081190.3.1;Solyc12g005410.2.1;Solyc10g079720.2.1;Solyc03g117630.1.1;Solyc03g111830.4.1;Solyc01g088400.4.1;Solyc11g008440.3.1;Solyc08g016670.3.1;Solyc11g066100.2.1;…
GO:0009507	chloroplast	CELLULAR_COMPONENT	2.88602e-11	2.3393e-14	683	91	1857	683	34694	Solyc12g005060.1.1;Solyc08g067870.2.1;Solyc01g081480.3.1;Solyc01g090697.1.1;Solyc03g118340.3.1;Solyc07g042440.3.1;Solyc09g064500.3.1;Solyc10g081650.2.1;Solyc10g018300.3.1;Solyc09g082690.3.1;Solyc11g008680.2.1;Solyc11g007680.2.1;Solyc04g050930.3.1;Solyc03g097370.4.1;Solyc05g013160.4.1;Solyc01g006540.4.1;Solyc11g065830.2.1;Solyc01g106090.3.1;Solyc08g014130.3.1;Solyc01g088090.3.1;Solyc02g063490.3.1;…
GO:0051259	protein complex oligomerization	BIOLOGICAL_PROCESS	3.95189e-11	3.66086e-14	683	14	28	683	34694	Solyc04g014480.3.1;Solyc06g076520.1.1;Solyc03g123540.3.1;Solyc06g076560.2.1;Solyc09g015020.1.1;Solyc09g015000.4.1;Solyc03g113930.3.1;Solyc07g042250.3.1;Solyc02g093600.3.1;Solyc06g076570.4.1;Solyc01g102960.3.1;Solyc08g062340.3.1;Solyc12g042830.3.1;Solyc11g020330.1.1
GO:0042542	response to hydrogen peroxide	BIOLOGICAL_PROCESS	8.71743e-11	9.08486e-14	683	13	23	683	34694	Solyc04g014480.3.1;Solyc06g076520.1.1;Solyc03g123540.3.1;Solyc06g076560.2.1;Solyc09g015020.1.1;Solyc09g015000.4.1;Solyc03g113930.3.1;Solyc02g093600.3.1;Solyc06g076570.4.1;Solyc01g102960.3.1;Solyc08g062340.3.1;Solyc12g042830.3.1;Solyc11g020330.1.1
GO:0043621	protein self-association	MOLECULAR_FUNCTION	1.33428e-10	1.54502e-13	683	14	32	683	34694	Solyc04g014480.3.1;Solyc04g014600.3.1;Solyc06g076520.1.1;Solyc03g123540.3.1;Solyc06g076560.2.1;Solyc09g015020.1.1;Solyc09g015000.4.1;Solyc03g113930.3.1;Solyc02g093600.3.1;Solyc06g076570.4.1;Solyc01g102960.3.1;Solyc08g062340.3.1;Solyc12g042830.3.1;Solyc11g020330.1.1
GO:0009536	plastid	CELLULAR_COMPONENT	3.69259e-10	4.70339e-13	683	94	2058	683	34694	Solyc12g005060.1.1;Solyc08g067870.2.1;Solyc01g081480.3.1;Solyc01g090697.1.1;Solyc03g118340.3.1;Solyc07g042440.3.1;Solyc09g064500.3.1;Solyc10g081650.2.1;Solyc10g018300.3.1;Solyc09g082690.3.1;Solyc11g008680.2.1;Solyc11g007680.2.1;Solyc04g050930.3.1;Solyc03g097370.4.1;Solyc05g013160.4.1;Solyc01g006540.4.1;Solyc11g065830.2.1;Solyc01g106090.3.1;Solyc08g014130.3.1;Solyc01g088090.3.1;Solyc02g063490.3.1;…
GO:0016491	oxidoreductase activity	MOLECULAR_FUNCTION	3.89758e-10	5.41582e-13	683	100	2267	683	34694	Solyc10g083400.1.1;Solyc03g113990.4.1;Solyc09g089580.4.1;Solyc07g042440.3.1;Solyc12g006370.3.1;Solyc01g094220.3.1;Solyc07g042460.2.1;Solyc10g081650.2.1;Solyc01g006540.4.1;Solyc04g078920.3.1;Solyc01g080410.3.1;Solyc01g005560.3.1;Solyc03g117630.1.1;Solyc03g116910.3.1;Solyc01g109420.3.1;Solyc01g088400.4.1;Solyc07g043590.3.1;Solyc10g018140.2.1;Solyc08g078040.4.1;Solyc03g115220.5.1;Solyc03g111970.4.1;…
GO:0000302	response to reactive oxygen species	BIOLOGICAL_PROCESS	2.9165e-09	4.39028e-12	683	16	65	683	34694	Solyc04g014480.3.1;Solyc06g076520.1.1;Solyc03g123540.3.1;Solyc06g076560.2.1;Solyc09g015020.1.1;Solyc09g015000.4.1;Solyc03g113930.3.1;Solyc02g093600.3.1;Solyc01g099100.4.1;Solyc06g076570.4.1;Solyc04g054190.3.1;Solyc12g010320.2.1;Solyc01g102960.3.1;Solyc08g062340.3.1;Solyc12g042830.3.1;Solyc11g020330.1.1
GO:0010035	response to inorganic substance	BIOLOGICAL_PROCESS	5.57405e-09	9.03621e-12	683	25	209	683	34694	Solyc06g076520.1.1;Solyc03g123540.3.1;Solyc03g114450.3.1;Solyc09g015000.4.1;Solyc03g113930.3.1;Solyc02g081170.5.1;Solyc02g093600.3.1;Solyc01g099100.4.1;Solyc04g054310.3.1;Solyc02g062390.3.1;Solyc08g062340.3.1;Solyc06g068600.3.1;Solyc12g042830.3.1;Solyc03g059170.3.1;Solyc04g014480.3.1;Solyc01g094690.5.1;Solyc08g081190.3.1;Solyc01g104740.3.1;Solyc06g076560.2.1;Solyc09g015020.1.1;Solyc07g042250.3.1;…
GO:0003824	catalytic activity	MOLECULAR_FUNCTION	4.09478e-08	7.11229e-11	683	314	11485	683	34694	Solyc10g083400.1.1;Solyc03g113990.4.1;Solyc01g088590.6.1;Solyc09g089580.4.1;Solyc12g006370.3.1;Solyc05g005490.4.1;Solyc01g094220.3.1;Solyc02g070020.1.1;Solyc01g006540.4.1;Solyc04g078920.3.1;Solyc03g111730.3.1;Solyc10g079720.2.1;Solyc03g117630.1.1;Solyc03g116910.3.1;Solyc03g111830.4.1;Solyc04g072890.4.1;Solyc01g109420.3.1;Solyc01g088400.4.1;Solyc10g018140.2.1;Solyc09g008020.4.1;Solyc11g018590.1.1;…
GO:0009526	plastid envelope	CELLULAR_COMPONENT	2.40387e-07	4.45367e-10	683	42	673	683	34694	Solyc04g010190.1.1;Solyc12g005060.1.1;Solyc10g085900.3.1;Solyc07g054210.3.1;Solyc08g067870.2.1;Solyc04g072400.4.1;Solyc05g009370.4.1;Solyc07g042440.3.1;Solyc04g082010.1.1;Solyc03g114450.3.1;Solyc12g017250.2.1;Solyc09g064500.3.1;Solyc08g043180.3.1;Solyc10g081650.2.1;Solyc10g018300.3.1;Solyc02g081170.5.1;Solyc09g082690.3.1;Solyc07g049690.3.1;Solyc04g050930.3.1;Solyc03g097370.4.1;Solyc09g011810.3.1;…
GO:0042221	response to chemical	BIOLOGICAL_PROCESS	1.73858e-06	3.4224e-09	683	68	1537	683	34694	Solyc04g074230.3.1;Solyc09g008170.3.1;Solyc06g076520.1.1;Solyc05g025680.3.1;Solyc04g011440.4.1;Solyc10g080880.2.1;Solyc07g042440.3.1;Solyc03g123540.3.1;Solyc07g042460.2.1;Solyc01g099100.4.1;Solyc04g054310.3.1;Solyc06g084390.3.1;Solyc04g074840.3.1;Solyc04g078920.3.1;Solyc12g042830.3.1;Solyc08g081190.3.1;Solyc09g065850.4.1;Solyc09g018070.1.1;Solyc03g117630.1.1;Solyc11g066100.2.1;Solyc11g013470.1.1;…
GO:0019752	carboxylic acid metabolic process	BIOLOGICAL_PROCESS	4.64299e-06	9.67738e-09	683	48	919	683	34694	Solyc10g005080.3.1;Solyc10g086180.2.1;Solyc01g009010.3.1;Solyc01g090697.1.1;Solyc01g099150.5.1.1;Solyc04g009960.3.1;Solyc05g050010.3.1;Solyc01g099190.4.1;Solyc08g066220.4.1;Solyc11g008680.2.1;Solyc01g099100.4.1;Solyc01g095080.3.1;Solyc01g099160.5.1;Solyc07g049690.3.1;Solyc01g080280.3.1;Solyc07g017610.3.1;Solyc10g038080.3.1;Solyc01g006540.4.1;Solyc04g078920.3.1;Solyc12g056940.2.1;Solyc08g066260.3.…
GO:0043436	oxoacid metabolic process	BIOLOGICAL_PROCESS	6.58911e-06	1.44967e-08	683	48	940	683	34694	Solyc10g005080.3.1;Solyc10g086180.2.1;Solyc01g009010.3.1;Solyc01g090697.1.1;Solyc01g099150.5.1.1;Solyc04g009960.3.1;Solyc05g050010.3.1;Solyc01g099190.4.1;Solyc08g066220.4.1;Solyc11g008680.2.1;Solyc01g099100.4.1;Solyc01g095080.3.1;Solyc01g099160.5.1;Solyc07g049690.3.1;Solyc01g080280.3.1;Solyc07g017610.3.1;Solyc10g038080.3.1;Solyc01g006540.4.1;Solyc04g078920.3.1;Solyc12g056940.2.1;Solyc08g066260.3.…
GO:0009651	response to salt stress	BIOLOGICAL_PROCESS	6.72895e-06	1.55835e-08	683	15	105	683	34694	Solyc04g014480.3.1;Solyc06g076520.1.1;Solyc03g123540.3.1;Solyc06g076560.2.1;Solyc09g015020.1.1;Solyc09g015000.4.1;Solyc03g113930.3.1;Solyc02g093600.3.1;Solyc01g099100.4.1;Solyc06g076570.4.1;Solyc01g102960.3.1;Solyc08g062340.3.1;Solyc12g042830.3.1;Solyc11g020330.1.1;Solyc05g010670.3.1
GO:0044281	small molecule metabolic process	BIOLOGICAL_PROCESS	7.81903e-06	1.90134e-08	683	69	1642	683	34694	Solyc12g005060.1.1;Solyc10g005080.3.1;Solyc10g086180.2.1;Solyc01g090697.1.1;Solyc03g063600.4.1;Solyc04g009960.3.1;Solyc11g008680.2.1;Solyc01g099100.4.1;Solyc02g078400.3.1;Solyc01g006540.4.1;Solyc04g078920.3.1;Solyc08g014130.3.1;Solyc02g063490.3.1;Solyc01g005560.3.1;Solyc10g079720.2.1;Solyc01g108730.3.1;Solyc01g104210.3.1;Solyc12g055930.3.1;Solyc04g009030.3.1;Solyc09g092380.3.1;Solyc07g065340.1.1;…
GO:0006082	organic acid metabolic process	BIOLOGICAL_PROCESS	8.17631e-06	2.08289e-08	683	49	987	683	34694	Solyc10g005080.3.1;Solyc10g086180.2.1;Solyc01g090697.1.1;Solyc04g009960.3.1;Solyc11g008680.2.1;Solyc01g099100.4.1;Solyc01g006540.4.1;Solyc04g078920.3.1;Solyc08g014130.3.1;Solyc02g063490.3.1;Solyc01g005560.3.1;Solyc10g079720.2.1;Solyc01g108730.3.1;Solyc01g104210.3.1;Solyc07g065340.1.1;Solyc02g062340.3.1;Solyc07g064410.1.1;Solyc01g094790.3.1;Solyc12g088220.2.1;Solyc03g120090.1.1;Solyc10g076600.2.1;…
GO:0044260	cellular macromolecule metabolic process	BIOLOGICAL_PROCESS	1.01367e-05	2.69967e-08	683	62	5629	683	34694	Solyc08g066700.3.1;Solyc01g111950.4.1;Solyc04g082510.3.1;Solyc08g074560.3.1;Solyc05g050570.3.1;Solyc03g020030.3.1;Solyc07g062970.3.1;Solyc07g051860.1.1;Solyc06g084390.3.1;Solyc08g078650.3.1;Solyc05g013160.4.1;Solyc03g111730.3.1;Solyc11g068770.1.1;Solyc01g080410.3.1;Solyc04g082720.3.1;Solyc07g051870.1.1;Solyc01g098740.4.1;Solyc03g111830.4.1;Solyc03g031850.1.1;Solyc09g010210.3.1;Solyc09g008020.4.1;…
GO:0006970	response to osmotic stress	BIOLOGICAL_PROCESS	4.76055e-05	1.37811e-07	683	15	126	683	34694	Solyc04g014480.3.1;Solyc06g076520.1.1;Solyc03g123540.3.1;Solyc06g076560.2.1;Solyc09g015020.1.1;Solyc09g015000.4.1;Solyc03g113930.3.1;Solyc02g093600.3.1;Solyc01g099100.4.1;Solyc06g076570.4.1;Solyc01g102960.3.1;Solyc08g062340.3.1;Solyc12g042830.3.1;Solyc11g020330.1.1;Solyc05g010670.3.1
GO:0044283	small molecule biosynthetic process	BIOLOGICAL_PROCESS	4.76055e-05	1.35146e-07	683	34	592	683	34694	Solyc11g072310.2.1;Solyc10g086180.2.1;Solyc01g099150.5.1.1;Solyc04g009960.3.1;Solyc05g050010.3.1;Solyc01g099190.4.1;Solyc11g008680.2.1;Solyc01g095080.3.1;Solyc01g099160.5.1;Solyc07g049690.3.1;Solyc01g080280.3.1;Solyc07g017610.3.1;Solyc10g038080.3.1;Solyc09g011810.3.1;Solyc01g006540.4.1;Solyc04g072039.1.1;Solyc12g056940.2.1;Solyc08g014130.3.1;Solyc11g073160.3.1;Solyc06g005490.3.1;Solyc10g079720.2.…
GO:0006979	response to oxidative stress	BIOLOGICAL_PROCESS	4.93028e-05	1.48434e-07	683	21	253	683	34694	Solyc01g080410.3.1;Solyc04g014480.3.1;Solyc03g111720.3.1;Solyc06g076520.1.1;Solyc07g042440.3.1;Solyc03g123540.3.1;Solyc06g076560.2.1;Solyc10g083650.1.1;Solyc09g015020.1.1;Solyc09g015000.4.1;Solyc03g113930.3.1;Solyc02g093600.3.1;Solyc01g099100.4.1;Solyc06g076570.4.1;Solyc04g054190.3.1;Solyc12g010320.2.1;Solyc01g102960.3.1;Solyc08g062340.3.1;Solyc12g042830.3.1;Solyc07g062060.3.1;Solyc11g020330.1.1
GO:0110165	cellular anatomical entity	CELLULAR_COMPONENT	5.70359e-05	1.7832e-07	683	444	18724	683	34694	Solyc03g118090.3.1;Solyc10g083400.1.1;Solyc05g054480.3.1;Solyc03g113990.4.1;Solyc10g083230.1.1;Solyc01g098190.3.1;Solyc01g006540.4.1;Solyc02g071080.3.1;Solyc11g065830.2.1;Solyc03g111730.3.1;Solyc01g106090.3.1;Solyc09g066060.4.1;Solyc12g089240.2.1;Solyc10g051120.3.1;Solyc12g099810.2.1;Solyc06g060570.3.1;Solyc10g079720.2.1;Solyc09g018070.1.1;Solyc03g117630.1.1;Solyc11g008440.3.1;Solyc11g066100.2.1;…
GO:0043170	macromolecule metabolic process	BIOLOGICAL_PROCESS	6.25491e-05	2.02799e-07	683	131	9493	683	34694	Solyc03g097120.3.1;Solyc01g111950.4.1;Solyc08g074560.3.1;Solyc07g062970.3.1;Solyc03g007000.4.1;Solyc05g013160.4.1;Solyc03g111730.3.1;Solyc09g066060.4.1;Solyc12g089240.2.1;Solyc02g090820.3.1;Solyc01g080410.3.1;Solyc04g082720.3.1;Solyc09g065850.4.1;Solyc03g111830.4.1;Solyc06g076670.3.1;Solyc11g013470.1.1;Solyc09g008020.4.1;Solyc12g055930.3.1;Solyc11g018590.1.1;Solyc09g065660.4.1;Solyc06g068990.4.1;…
GO:0042170	plastid membrane	CELLULAR_COMPONENT	0.000112364	3.77323e-07	683	32	562	683	34694	Solyc04g010190.1.1;Solyc12g005060.1.1;Solyc10g085900.3.1;Solyc07g054210.3.1;Solyc08g067870.2.1;Solyc04g072400.4.1;Solyc07g042440.3.1;Solyc04g082010.1.1;Solyc03g114450.3.1;Solyc12g017250.2.1;Solyc09g064500.3.1;Solyc08g043180.3.1;Solyc10g081650.2.1;Solyc10g018300.3.1;Solyc02g081170.5.1;Solyc09g082690.3.1;Solyc07g049690.3.1;Solyc04g050930.3.1;Solyc01g067530.3.1;Solyc11g065830.2.1;Solyc01g106090.3.1;…
GO:0031975	envelope	CELLULAR_COMPONENT	0.000149843	5.37879e-07	683	50	1131	683	34694	Solyc12g005060.1.1;Solyc03g118090.3.1;Solyc08g067870.2.1;Solyc07g042440.3.1;Solyc09g064500.3.1;Solyc10g081650.2.1;Solyc10g018300.3.1;Solyc09g082690.3.1;Solyc04g050930.3.1;Solyc03g097370.4.1;Solyc02g150141.1.1;Solyc11g065830.2.1;Solyc01g106090.3.1;Solyc01g066720.3.1;Solyc10g051120.3.1;Solyc12g005410.2.1;Solyc07g042250.3.1;Solyc06g084300.1.1;Solyc10g081240.3.1;Solyc09g091070.3.1;Solyc04g081320.4.1;…
GO:0031967	organelle envelope	CELLULAR_COMPONENT	0.000149843	5.37879e-07	683	50	1131	683	34694	Solyc12g005060.1.1;Solyc03g118090.3.1;Solyc08g067870.2.1;Solyc07g042440.3.1;Solyc09g064500.3.1;Solyc10g081650.2.1;Solyc10g018300.3.1;Solyc09g082690.3.1;Solyc04g050930.3.1;Solyc03g097370.4.1;Solyc02g150141.1.1;Solyc11g065830.2.1;Solyc01g106090.3.1;Solyc01g066720.3.1;Solyc10g051120.3.1;Solyc12g005410.2.1;Solyc07g042250.3.1;Solyc06g084300.1.1;Solyc10g081240.3.1;Solyc09g091070.3.1;Solyc04g081320.4.1;…
GO:0032991	protein-containing complex	CELLULAR_COMPONENT	0.000166166	6.34957e-07	683	30	3256	683	34694	Solyc12g005060.1.1;Solyc08g066700.3.1;Solyc05g009370.4.1;Solyc12g017250.2.1;Solyc09g064500.3.1;Solyc10g078430.2.1;Solyc08g043180.3.1;Solyc03g007890.3.1;Solyc01g109130.3.1;Solyc08g075750.5.1;Solyc07g052470.3.1;Solyc03g097370.4.1;Solyc01g111030.2.1;Solyc01g099660.4.1;Solyc01g106090.3.1;Solyc11g068770.1.1;Solyc06g036290.3.1;Solyc12g044240.3.1;Solyc06g076670.3.1;Solyc01g010760.3.1;Solyc06g060340.3.1;…
GO:0042440	pigment metabolic process	BIOLOGICAL_PROCESS	0.000166166	6.24315e-07	683	13	105	683	34694	Solyc03g007960.3.1;Solyc11g013110.2.1;Solyc07g054210.3.1;Solyc08g080090.3.1;Solyc09g082460.3.1;Solyc10g081650.2.1;Solyc01g067890.4.1;Solyc04g015750.3.1;Solyc04g079960.1.1;Solyc03g031860.3.1;Solyc08g074682.1.1;Solyc04g072039.1.1;Solyc01g088090.3.1
GO:0004398	histidine decarboxylase activity	MOLECULAR_FUNCTION	0.000186152	7.32883e-07	683	4	1	683	34694	Solyc08g066240.3.1;Solyc08g066250.4.1;Solyc08g066260.3.1;Solyc08g066220.4.1
GO:0042026	protein refolding	BIOLOGICAL_PROCESS	0.000191817	7.77398e-07	683	8	31	683	34694	Solyc11g069790.2.1;Solyc04g011440.4.1;Solyc03g117630.1.1;Solyc01g099660.4.1;Solyc11g066100.2.1;Solyc09g091180.3.1;Solyc02g088610.4.1;Solyc09g075950.1.1
GO:0034605	cellular response to heat	BIOLOGICAL_PROCESS	0.000279753	1.16618e-06	683	8	33	683	34694	Solyc01g067910.4.1;Solyc03g115230.3.1;Solyc09g065660.4.1;Solyc03g097120.3.1;Solyc03g118340.3.1;Solyc06g036290.3.1;Solyc03g007890.3.1;Solyc02g088610.4.1
GO:0031976	plastid thylakoid	CELLULAR_COMPONENT	0.000333262	1.46642e-06	683	27	455	683	34694	Solyc04g010190.1.1;Solyc12g005060.1.1;Solyc10g085900.3.1;Solyc07g054210.3.1;Solyc04g072400.4.1;Solyc07g042440.3.1;Solyc04g082010.1.1;Solyc03g114450.3.1;Solyc12g017250.2.1;Solyc09g064500.3.1;Solyc08g043180.3.1;Solyc10g018300.3.1;Solyc02g081170.5.1;Solyc09g082690.3.1;Solyc02g081550.3.1;Solyc04g050930.3.1;Solyc01g006540.4.1;Solyc01g106090.3.1;Solyc06g066620.4.1;Solyc04g082250.3.1;Solyc01g096660.3.1;…
GO:0009534	chloroplast thylakoid	CELLULAR_COMPONENT	0.000333262	1.46642e-06	683	27	455	683	34694	Solyc04g010190.1.1;Solyc12g005060.1.1;Solyc10g085900.3.1;Solyc07g054210.3.1;Solyc04g072400.4.1;Solyc07g042440.3.1;Solyc04g082010.1.1;Solyc03g114450.3.1;Solyc12g017250.2.1;Solyc09g064500.3.1;Solyc08g043180.3.1;Solyc10g018300.3.1;Solyc02g081170.5.1;Solyc09g082690.3.1;Solyc02g081550.3.1;Solyc04g050930.3.1;Solyc01g006540.4.1;Solyc01g106090.3.1;Solyc06g066620.4.1;Solyc04g082250.3.1;Solyc01g096660.3.1;…
GO:0032787	monocarboxylic acid metabolic process	BIOLOGICAL_PROCESS	0.0003662	1.65375e-06	683	26	430	683	34694	Solyc10g005080.3.1;Solyc10g086180.2.1;Solyc01g009010.3.1;Solyc01g099150.5.1.1;Solyc01g099190.4.1;Solyc11g008680.2.1;Solyc01g099100.4.1;Solyc01g099160.5.1;Solyc07g049690.3.1;Solyc10g038080.3.1;Solyc01g006540.4.1;Solyc04g078920.3.1;Solyc12g056940.2.1;Solyc09g091470.3.1;Solyc01g005560.3.1;Solyc11g010450.2.1;Solyc06g005490.3.1;Solyc01g108730.3.1;Solyc01g104210.3.1;Solyc04g014670.3.1;Solyc02g062340.3.…
GO:0031072	heat shock protein binding	MOLECULAR_FUNCTION	0.000549276	2.54412e-06	683	9	51	683	34694	Solyc04g011440.4.1;Solyc04g072160.3.1;Solyc03g117630.1.1;Solyc01g099660.4.1;Solyc09g064380.3.1;Solyc11g066100.2.1;Solyc11g071830.2.1;Solyc09g075950.1.1;Solyc08g079170.3.1
GO:0015994	chlorophyll metabolic process	BIOLOGICAL_PROCESS	0.000615154	2.92049e-06	683	8	38	683	34694	Solyc07g054210.3.1;Solyc04g050930.3.1;Solyc08g080090.3.1;Solyc02g070490.4.1;Solyc09g082460.3.1;Solyc01g067890.4.1;Solyc01g088090.3.1;Solyc04g015750.3.1
GO:0009941	chloroplast envelope	CELLULAR_COMPONENT	0.000753086	3.66253e-06	683	21	313	683	34694	Solyc03g007960.3.1;Solyc07g054210.3.1;Solyc08g067870.2.1;Solyc12g005410.2.1;Solyc04g072400.4.1;Solyc05g009370.4.1;Solyc04g082250.3.1;Solyc10g081650.2.1;Solyc07g042250.3.1;Solyc03g111610.3.1;Solyc07g049690.3.1;Solyc06g084300.1.1;Solyc03g097370.4.1;Solyc11g067160.2.1;Solyc09g091070.3.1;Solyc01g067530.3.1;Solyc09g014300.3.1;Solyc11g065830.2.1;Solyc09g091180.3.1;Solyc05g010670.3.1;Solyc05g005480.2.1
GO:0046148	pigment biosynthetic process	BIOLOGICAL_PROCESS	0.000837841	4.17174e-06	683	11	88	683	34694	Solyc03g007960.3.1;Solyc11g013110.2.1;Solyc04g079960.1.1;Solyc07g054210.3.1;Solyc09g082460.3.1;Solyc03g031860.3.1;Solyc08g074682.1.1;Solyc04g072039.1.1;Solyc10g081650.2.1;Solyc01g067890.4.1;Solyc04g015750.3.1
GO:0051084	'de novo' posttranslational protein folding	BIOLOGICAL_PROCESS	0.000919672	4.79217e-06	683	8	41	683	34694	Solyc04g011440.4.1;Solyc03g117630.1.1;Solyc01g099660.4.1;Solyc07g053615.2.1;Solyc11g066100.2.1;Solyc07g042250.3.1;Solyc09g075950.1.1;Solyc02g077670.3.1
GO:0051085	chaperone cofactor-dependent protein refolding	BIOLOGICAL_PROCESS	0.000919672	4.79217e-06	683	8	41	683	34694	Solyc04g011440.4.1;Solyc03g117630.1.1;Solyc01g099660.4.1;Solyc07g053615.2.1;Solyc11g066100.2.1;Solyc07g042250.3.1;Solyc09g075950.1.1;Solyc02g077670.3.1
GO:0016614	oxidoreductase activity, acting on CH-OH group of donors	MOLECULAR_FUNCTION	0.000929893	5.06079e-06	683	18	243	683	34694	Solyc02g063490.3.1;Solyc01g005560.3.1;Solyc09g082720.3.1;Solyc03g116910.3.1;Solyc05g055700.3.1;Solyc10g018140.2.1;Solyc08g076780.2.1;Solyc11g011340.2.1;Solyc01g068080.4.1;Solyc10g038080.3.1;Solyc03g097170.3.1;Solyc11g067160.2.1;Solyc09g091070.3.1;Solyc08g005630.3.1;Solyc08g076790.3.1;Solyc04g078920.3.1;Solyc12g056600.3.1;Solyc06g062600.3.1
GO:0061077	chaperone-mediated protein folding	BIOLOGICAL_PROCESS	0.000929893	5.0408e-06	683	9	56	683	34694	Solyc09g092690.3.1;Solyc04g011440.4.1;Solyc03g117630.1.1;Solyc01g099660.4.1;Solyc07g053615.2.1;Solyc11g066100.2.1;Solyc07g042250.3.1;Solyc09g075950.1.1;Solyc02g077670.3.1
GO:0045486	naringenin 3-dioxygenase activity	MOLECULAR_FUNCTION	0.00136678	7.59673e-06	683	3	0	683	34694	Solyc01g108880.4.1;Solyc11g013110.2.1;Solyc02g083860.3.1
GO:0050896	response to stimulus	BIOLOGICAL_PROCESS	0.00143218	8.12607e-06	683	120	3962	683	34694	Solyc09g008170.3.1;Solyc03g097120.3.1;Solyc07g042440.3.1;Solyc03g123540.3.1;Solyc07g042460.2.1;Solyc02g078400.3.1;Solyc04g078920.3.1;Solyc12g042830.3.1;Solyc12g089240.2.1;Solyc02g090820.3.1;Solyc01g080410.3.1;Solyc08g081190.3.1;Solyc09g065850.4.1;Solyc09g018070.1.1;Solyc03g117630.1.1;Solyc06g076670.3.1;Solyc11g066100.2.1;Solyc11g013470.1.1;Solyc07g042250.3.1;Solyc09g065660.4.1;Solyc06g068990.4.1;…
GO:0003676	nucleic acid binding	MOLECULAR_FUNCTION	0.00152859	8.85011e-06	683	52	4463	683	34694	Solyc10g005080.3.1;Solyc08g066700.3.1;Solyc03g097120.3.1;Solyc02g021680.3.1;Solyc03g097370.4.1;Solyc09g066060.4.1;Solyc02g090820.3.1;Solyc11g068770.1.1;Solyc05g012020.2.1;Solyc06g076670.3.1;Solyc11g013470.1.1;Solyc12g055930.3.1;Solyc09g065660.4.1;Solyc02g077920.4.1;Solyc10g083630.2.1;Solyc05g055010.4.1;Solyc02g077490.4.1;Solyc02g061790.5.1;Solyc02g069570.3.1;Solyc01g100460.3.1;Solyc01g106700.3.1;…
GO:0006820	anion transport	BIOLOGICAL_PROCESS	0.00164138	9.71629e-06	683	25	448	683	34694	Solyc07g008520.3.1;Solyc03g118090.3.1;Solyc03g080020.4.1;Solyc03g120570.3.1;Solyc02g070280.3.1;Solyc01g098190.3.1;Solyc10g024490.2.1;Solyc02g014430.3.1;Solyc09g013150.4.1;Solyc06g061170.3.1;Solyc06g066600.3.1;Solyc04g072760.3.1;Solyc06g068600.3.1;Solyc05g013510.4.1;Solyc10g051120.3.1;Solyc01g096740.4.1;Solyc10g055390.2.1;Solyc01g067710.3.1;Solyc12g094420.2.1;Solyc01g010760.3.1;Solyc02g085170.4.1;…
GO:0005622	intracellular anatomical structure	CELLULAR_COMPONENT	0.00164138	9.88327e-06	683	307	12434	683	34694	Solyc03g118090.3.1;Solyc05g054480.3.1;Solyc03g097120.3.1;Solyc03g113990.4.1;Solyc12g006370.3.1;Solyc02g070020.1.1;Solyc01g006540.4.1;Solyc11g065830.2.1;Solyc04g078920.3.1;Solyc03g111730.3.1;Solyc01g106090.3.1;Solyc09g066060.4.1;Solyc12g089240.2.1;Solyc10g051120.3.1;Solyc02g090820.3.1;Solyc04g082720.3.1;Solyc06g060570.3.1;Solyc08g081190.3.1;Solyc12g005410.2.1;Solyc10g079720.2.1;Solyc03g117630.1.1;…
GO:0006458	'de novo' protein folding	BIOLOGICAL_PROCESS	0.00165232	1.01404e-05	683	8	46	683	34694	Solyc04g011440.4.1;Solyc03g117630.1.1;Solyc01g099660.4.1;Solyc07g053615.2.1;Solyc11g066100.2.1;Solyc07g042250.3.1;Solyc09g075950.1.1;Solyc02g077670.3.1
GO:1901700	response to oxygen-containing compound	BIOLOGICAL_PROCESS	0.00209231	1.3083e-05	683	30	599	683	34694	Solyc04g074230.3.1;Solyc06g076520.1.1;Solyc03g123540.3.1;Solyc09g015000.4.1;Solyc04g064850.3.1;Solyc03g113930.3.1;Solyc02g081170.5.1;Solyc02g093600.3.1;Solyc01g099100.4.1;Solyc04g054190.3.1;Solyc02g062390.3.1;Solyc08g062340.3.1;Solyc04g078920.3.1;Solyc12g042830.3.1;Solyc04g014480.3.1;Solyc01g094690.5.1;Solyc08g081190.3.1;Solyc01g104740.3.1;Solyc06g076560.2.1;Solyc02g063355.1.1;Solyc09g015020.1.1;…
GO:0016616	oxidoreductase activity, acting on the CH-OH group of donors, NAD or NADP as acceptor	MOLECULAR_FUNCTION	0.00223683	1.42457e-05	683	16	213	683	34694	Solyc02g063490.3.1;Solyc01g005560.3.1;Solyc09g082720.3.1;Solyc03g116910.3.1;Solyc05g055700.3.1;Solyc10g018140.2.1;Solyc08g076780.2.1;Solyc11g011340.2.1;Solyc01g068080.4.1;Solyc10g038080.3.1;Solyc03g097170.3.1;Solyc11g067160.2.1;Solyc09g091070.3.1;Solyc08g076790.3.1;Solyc04g078920.3.1;Solyc12g056600.3.1
GO:0034440	lipid oxidation	BIOLOGICAL_PROCESS	0.00232507	1.52911e-05	683	8	49	683	34694	Solyc01g099160.5.1;Solyc10g076600.2.1;Solyc01g006540.4.1;Solyc01g099150.5.1.1;Solyc04g054890.3.1;Solyc04g078920.3.1;Solyc01g099190.4.1;Solyc09g091470.3.1
GO:0009535	chloroplast thylakoid membrane	CELLULAR_COMPONENT	0.00232507	1.56153e-05	683	23	403	683	34694	Solyc04g010190.1.1;Solyc06g066620.4.1;Solyc12g005060.1.1;Solyc10g085900.3.1;Solyc07g054210.3.1;Solyc04g072400.4.1;Solyc07g042440.3.1;Solyc04g082010.1.1;Solyc03g114450.3.1;Solyc12g017250.2.1;Solyc01g096660.3.1;Solyc09g064500.3.1;Solyc08g043180.3.1;Solyc10g018300.3.1;Solyc02g081170.5.1;Solyc07g042250.3.1;Solyc09g082690.3.1;Solyc06g060340.3.1;Solyc04g050930.3.1;Solyc04g081320.4.1;Solyc07g054290.1.1;…
GO:0055035	plastid thylakoid membrane	CELLULAR_COMPONENT	0.00232507	1.56153e-05	683	23	403	683	34694	Solyc04g010190.1.1;Solyc06g066620.4.1;Solyc12g005060.1.1;Solyc10g085900.3.1;Solyc07g054210.3.1;Solyc04g072400.4.1;Solyc07g042440.3.1;Solyc04g082010.1.1;Solyc03g114450.3.1;Solyc12g017250.2.1;Solyc01g096660.3.1;Solyc09g064500.3.1;Solyc08g043180.3.1;Solyc10g018300.3.1;Solyc02g081170.5.1;Solyc07g042250.3.1;Solyc09g082690.3.1;Solyc06g060340.3.1;Solyc04g050930.3.1;Solyc04g081320.4.1;Solyc07g054290.1.1;…
GO:0005788	endoplasmic reticulum lumen	CELLULAR_COMPONENT	0.002371	1.64729e-05	683	7	35	683	34694	Solyc06g084390.3.1;Solyc04g011440.4.1;Solyc03g117630.1.1;Solyc09g005120.3.1;Solyc01g099660.4.1;Solyc11g066100.2.1;Solyc11g020040.2.1
GO:0016829	lyase activity	MOLECULAR_FUNCTION	0.002371	1.64399e-05	683	25	463	683	34694	Solyc10g086180.2.1;Solyc05g050570.3.1;Solyc11g068730.2.1;Solyc02g093580.5.1;Solyc05g005490.4.1;Solyc04g009960.3.1;Solyc05g050010.3.1;Solyc08g066220.4.1;Solyc01g095080.3.1;Solyc07g049690.3.1;Solyc10g038080.3.1;Solyc06g068600.3.1;Solyc08g066260.3.1;Solyc08g066240.3.1;Solyc11g073160.3.1;Solyc10g079720.2.1;Solyc09g091430.5.1;Solyc11g066890.1.1;Solyc03g111690.4.1;Solyc04g076880.3.1;Solyc02g062340.3.1;…
GO:0044267	cellular protein metabolic process	BIOLOGICAL_PROCESS	0.00243524	1.72012e-05	683	52	4390	683	34694	Solyc01g111950.4.1;Solyc04g082510.3.1;Solyc08g074560.3.1;Solyc05g050570.3.1;Solyc03g020030.3.1;Solyc07g062970.3.1;Solyc07g051860.1.1;Solyc08g078650.3.1;Solyc05g013160.4.1;Solyc03g111730.3.1;Solyc11g068770.1.1;Solyc01g080410.3.1;Solyc07g051870.1.1;Solyc01g098740.4.1;Solyc03g111830.4.1;Solyc09g008020.4.1;Solyc06g068990.4.1;Solyc01g108400.3.1;Solyc07g065860.3.1;Solyc06g053620.5.1;Solyc07g063750.3.1;…
GO:0006631	fatty acid metabolic process	BIOLOGICAL_PROCESS	0.00245839	1.76494e-05	683	16	217	683	34694	Solyc10g005080.3.1;Solyc01g099150.5.1.1;Solyc01g104210.3.1;Solyc01g099190.4.1;Solyc11g008680.2.1;Solyc01g099100.4.1;Solyc01g099160.5.1;Solyc07g049690.3.1;Solyc07g064410.1.1;Solyc10g076600.2.1;Solyc01g006540.4.1;Solyc03g097470.3.1;Solyc04g054890.3.1;Solyc04g078920.3.1;Solyc12g056940.2.1;Solyc09g091470.3.1
GO:0009532	plastid stroma	CELLULAR_COMPONENT	0.00357385	2.60714e-05	683	22	388	683	34694	Solyc08g007010.4.1;Solyc05g009370.4.1;Solyc10g085040.1.1;Solyc09g064500.3.1;Solyc11g066890.1.1;Solyc07g042250.3.1;Solyc11g008680.2.1;Solyc03g111610.3.1;Solyc03g097370.4.1;Solyc12g007010.2.1;Solyc09g011810.3.1;Solyc01g006540.4.1;Solyc11g067160.2.1;Solyc03g031860.3.1;Solyc09g091070.3.1;Solyc01g067530.3.1;Solyc01g106090.3.1;Solyc09g091180.3.1;Solyc07g062060.3.1;Solyc03g117890.3.1;Solyc05g010670.3.1;…
GO:0009704	de-etiolation	BIOLOGICAL_PROCESS	0.00404005	2.99402e-05	683	3	1	683	34694	Solyc03g059170.3.1;Solyc03g114450.3.1;Solyc05g010670.3.1
GO:0042651	thylakoid membrane	CELLULAR_COMPONENT	0.00440053	3.31212e-05	683	23	424	683	34694	Solyc04g010190.1.1;Solyc06g066620.4.1;Solyc12g005060.1.1;Solyc10g085900.3.1;Solyc07g054210.3.1;Solyc04g072400.4.1;Solyc07g042440.3.1;Solyc04g082010.1.1;Solyc03g114450.3.1;Solyc12g017250.2.1;Solyc01g096660.3.1;Solyc09g064500.3.1;Solyc08g043180.3.1;Solyc10g018300.3.1;Solyc02g081170.5.1;Solyc07g042250.3.1;Solyc09g082690.3.1;Solyc06g060340.3.1;Solyc04g050930.3.1;Solyc04g081320.4.1;Solyc07g054290.1.1;…
GO:0016053	organic acid biosynthetic process	BIOLOGICAL_PROCESS	0.00473357	3.67241e-05	683	24	457	683	34694	Solyc11g072310.2.1;Solyc10g079720.2.1;Solyc10g086180.2.1;Solyc09g082460.3.1;Solyc01g099150.5.1.1;Solyc04g009960.3.1;Solyc05g050010.3.1;Solyc01g104210.3.1;Solyc01g099190.4.1;Solyc11g066890.1.1;Solyc11g008680.2.1;Solyc01g095080.3.1;Solyc07g065340.1.1;Solyc01g099160.5.1;Solyc07g049690.3.1;Solyc01g080280.3.1;Solyc07g017610.3.1;Solyc10g038080.3.1;Solyc01g094790.3.1;Solyc12g088220.2.1;Solyc01g006540.4.…
GO:0046394	carboxylic acid biosynthetic process	BIOLOGICAL_PROCESS	0.00473357	3.6713e-05	683	23	427	683	34694	Solyc10g079720.2.1;Solyc10g086180.2.1;Solyc09g082460.3.1;Solyc01g099150.5.1.1;Solyc04g009960.3.1;Solyc05g050010.3.1;Solyc01g104210.3.1;Solyc01g099190.4.1;Solyc11g066890.1.1;Solyc11g008680.2.1;Solyc01g095080.3.1;Solyc07g065340.1.1;Solyc01g099160.5.1;Solyc07g049690.3.1;Solyc01g080280.3.1;Solyc07g017610.3.1;Solyc10g038080.3.1;Solyc01g094790.3.1;Solyc12g088220.2.1;Solyc01g006540.4.1;Solyc03g097470.3.…
GO:0043228	non-membrane-bounded organelle	CELLULAR_COMPONENT	0.00483348	3.86186e-05	683	13	1720	683	34694	Solyc11g068770.1.1;Solyc08g066700.3.1;Solyc05g054480.3.1;Solyc08g006155.2.1;Solyc05g009370.4.1;Solyc01g104740.3.1;Solyc10g085040.1.1;Solyc12g044240.3.1;Solyc06g060840.1.1;Solyc03g120690.3.1;Solyc01g111030.2.1;Solyc07g063610.5.1;Solyc11g068430.3.1
GO:0043232	intracellular non-membrane-bounded organelle	CELLULAR_COMPONENT	0.00483348	3.86186e-05	683	13	1720	683	34694	Solyc11g068770.1.1;Solyc08g066700.3.1;Solyc05g054480.3.1;Solyc08g006155.2.1;Solyc05g009370.4.1;Solyc01g104740.3.1;Solyc10g085040.1.1;Solyc12g044240.3.1;Solyc06g060840.1.1;Solyc03g120690.3.1;Solyc01g111030.2.1;Solyc07g063610.5.1;Solyc11g068430.3.1
GO:0009579	thylakoid	CELLULAR_COMPONENT	0.00514551	4.17074e-05	683	28	581	683	34694	Solyc04g010190.1.1;Solyc12g005060.1.1;Solyc10g085900.3.1;Solyc07g054210.3.1;Solyc04g072400.4.1;Solyc07g042440.3.1;Solyc04g082010.1.1;Solyc03g114450.3.1;Solyc12g017250.2.1;Solyc09g064500.3.1;Solyc08g043180.3.1;Solyc10g018300.3.1;Solyc02g081170.5.1;Solyc09g082690.3.1;Solyc02g081550.3.1;Solyc04g050930.3.1;Solyc01g006540.4.1;Solyc01g106090.3.1;Solyc06g066620.4.1;Solyc04g082250.3.1;Solyc01g096660.3.1;…
GO:0006778	porphyrin-containing compound metabolic process	BIOLOGICAL_PROCESS	0.0055351	4.55063e-05	683	8	58	683	34694	Solyc07g054210.3.1;Solyc04g050930.3.1;Solyc08g080090.3.1;Solyc02g070490.4.1;Solyc09g082460.3.1;Solyc01g067890.4.1;Solyc01g088090.3.1;Solyc04g015750.3.1
GO:0010467	gene expression	BIOLOGICAL_PROCESS	0.00591057	4.92776e-05	683	54	4402	683	34694	Solyc11g011210.2.1;Solyc10g005080.3.1;Solyc08g066700.3.1;Solyc03g097120.3.1;Solyc02g021680.3.1;Solyc12g007180.2.1;Solyc01g111030.2.1;Solyc08g063040.4.1;Solyc09g066060.4.1;Solyc12g089240.2.1;Solyc02g090820.3.1;Solyc11g068770.1.1;Solyc09g065850.4.1;Solyc05g012020.2.1;Solyc02g079930.3.1;Solyc06g076670.3.1;Solyc11g013470.1.1;Solyc12g055930.3.1;Solyc02g084420.3.1;Solyc09g065660.4.1;Solyc02g077920.4.1;…
GO:0033013	tetrapyrrole metabolic process	BIOLOGICAL_PROCESS	0.00600897	5.07938e-05	683	8	59	683	34694	Solyc07g054210.3.1;Solyc04g050930.3.1;Solyc08g080090.3.1;Solyc02g070490.4.1;Solyc09g082460.3.1;Solyc01g067890.4.1;Solyc01g088090.3.1;Solyc04g015750.3.1
GO:0019842	vitamin binding	MOLECULAR_FUNCTION	0.00619219	5.30595e-05	683	19	321	683	34694	Solyc06g068270.3.1;Solyc11g013110.2.1;Solyc08g066240.3.1;Solyc11g072310.2.1;Solyc10g079720.2.1;Solyc09g089580.4.1;Solyc09g089740.3.1;Solyc05g050010.3.1;Solyc09g089720.4.1;Solyc10g007110.3.1;Solyc02g083860.3.1;Solyc08g066220.4.1;Solyc04g054310.3.1;Solyc01g095080.3.1;Solyc11g005200.2.1;Solyc08g066250.4.1;Solyc01g108880.4.1;Solyc03g095900.5.1;Solyc08g066260.3.1
GO:0009570	chloroplast stroma	CELLULAR_COMPONENT	0.00644521	5.59739e-05	683	21	380	683	34694	Solyc08g007010.4.1;Solyc05g009370.4.1;Solyc10g085040.1.1;Solyc09g064500.3.1;Solyc11g066890.1.1;Solyc07g042250.3.1;Solyc11g008680.2.1;Solyc03g111610.3.1;Solyc03g097370.4.1;Solyc12g007010.2.1;Solyc09g011810.3.1;Solyc01g006540.4.1;Solyc11g067160.2.1;Solyc09g091070.3.1;Solyc01g067530.3.1;Solyc01g106090.3.1;Solyc09g091180.3.1;Solyc07g062060.3.1;Solyc03g117890.3.1;Solyc05g010670.3.1;Solyc05g005480.2.1
GO:0098656	anion transmembrane transport	BIOLOGICAL_PROCESS	0.00725811	6.38741e-05	683	11	121	683	34694	Solyc01g096740.4.1;Solyc02g070280.3.1;Solyc06g061170.3.1;Solyc12g056620.2.1;Solyc01g067710.3.1;Solyc04g072760.3.1;Solyc06g068600.3.1;Solyc01g010760.3.1;Solyc05g013510.4.1;Solyc01g098190.3.1;Solyc10g051120.3.1
GO:0005777	peroxisome	CELLULAR_COMPONENT	0.00790505	7.32288e-05	683	11	123	683	34694	Solyc07g047800.3.1;Solyc01g099100.4.1;Solyc04g014480.3.1;Solyc06g076690.4.1;Solyc10g076600.2.1;Solyc12g006370.3.1;Solyc04g054890.3.1;Solyc04g078920.3.1;Solyc07g043590.3.1;Solyc09g091470.3.1;Solyc04g014670.3.1
GO:0090304	nucleic acid metabolic process	BIOLOGICAL_PROCESS	0.00790505	7.18438e-05	683	56	4478	683	34694	Solyc11g011210.2.1;Solyc10g005080.3.1;Solyc08g066700.3.1;Solyc03g097120.3.1;Solyc02g021680.3.1;Solyc12g007180.2.1;Solyc01g111030.2.1;Solyc08g063040.4.1;Solyc09g066060.4.1;Solyc12g089240.2.1;Solyc02g090820.3.1;Solyc11g068770.1.1;Solyc04g082720.3.1;Solyc09g065850.4.1;Solyc05g012020.2.1;Solyc06g076670.3.1;Solyc11g013470.1.1;Solyc12g055930.3.1;Solyc02g084420.3.1;Solyc09g065660.4.1;Solyc05g012940.4.1;…
GO:0042579	microbody	CELLULAR_COMPONENT	0.00790505	7.32288e-05	683	11	123	683	34694	Solyc07g047800.3.1;Solyc01g099100.4.1;Solyc04g014480.3.1;Solyc06g076690.4.1;Solyc10g076600.2.1;Solyc12g006370.3.1;Solyc04g054890.3.1;Solyc04g078920.3.1;Solyc07g043590.3.1;Solyc09g091470.3.1;Solyc04g014670.3.1
GO:0009835	fruit ripening	BIOLOGICAL_PROCESS	0.00790505	7.30611e-05	683	5	18	683	34694	Solyc01g095080.3.1;Solyc05g050010.3.1;Solyc10g080210.2.1;Solyc09g089580.4.1;Solyc03g095900.5.1
GO:0006790	sulfur compound metabolic process	BIOLOGICAL_PROCESS	0.00862499	8.08968e-05	683	19	332	683	34694	Solyc08g007010.4.1;Solyc04g057890.3.1;Solyc07g056430.3.1;Solyc10g079720.2.1;Solyc01g081270.2.1;Solyc09g082460.3.1;Solyc07g056420.4.1;Solyc01g067890.4.1;Solyc09g092380.3.1;Solyc08g081010.3.1;Solyc07g065340.1.1;Solyc07g017610.3.1;Solyc12g007010.2.1;Solyc01g094790.3.1;Solyc07g056510.3.1;Solyc09g014300.3.1;Solyc12g011310.2.1;Solyc12g056940.2.1;Solyc01g081250.3.1
GO:0034357	photosynthetic membrane	CELLULAR_COMPONENT	0.00932395	8.85322e-05	683	23	454	683	34694	Solyc04g010190.1.1;Solyc06g066620.4.1;Solyc12g005060.1.1;Solyc10g085900.3.1;Solyc07g054210.3.1;Solyc04g072400.4.1;Solyc07g042440.3.1;Solyc04g082010.1.1;Solyc03g114450.3.1;Solyc12g017250.2.1;Solyc01g096660.3.1;Solyc09g064500.3.1;Solyc08g043180.3.1;Solyc10g018300.3.1;Solyc02g081170.5.1;Solyc07g042250.3.1;Solyc09g082690.3.1;Solyc06g060340.3.1;Solyc04g050930.3.1;Solyc04g081320.4.1;Solyc07g054290.1.1;…
GO:0051787	misfolded protein binding	MOLECULAR_FUNCTION	0.00944727	9.0797e-05	683	5	19	683	34694	Solyc11g066100.2.1;Solyc04g011440.4.1;Solyc03g117630.1.1;Solyc01g099660.4.1;Solyc09g075950.1.1
GO:0006412	translation	BIOLOGICAL_PROCESS	0.010275	9.99423e-05	683	4	921	683	34694	Solyc11g068770.1.1;Solyc01g095410.3.1;Solyc06g071790.3.1;Solyc05g009370.4.1
GO:0051276	chromosome organization	BIOLOGICAL_PROCESS	0.0104586	0.000102939	683	1	612	683	34694	Solyc03g097370.4.1
GO:0008509	anion transmembrane transporter activity	MOLECULAR_FUNCTION	0.0113085	0.000112614	683	12	153	683	34694	Solyc01g096740.4.1;Solyc03g118090.3.1;Solyc02g070280.3.1;Solyc06g061170.3.1;Solyc07g051950.3.1;Solyc12g056620.2.1;Solyc01g067710.3.1;Solyc04g072760.3.1;Solyc06g068600.3.1;Solyc01g010760.3.1;Solyc01g098190.3.1;Solyc10g051120.3.1
GO:0016108	tetraterpenoid metabolic process	BIOLOGICAL_PROCESS	0.0130519	0.00013602	683	5	21	683	34694	Solyc03g007960.3.1;Solyc03g031860.3.1;Solyc04g079960.1.1;Solyc04g050930.3.1;Solyc10g081650.2.1
GO:0016116	carotenoid metabolic process	BIOLOGICAL_PROCESS	0.0130519	0.00013602	683	5	21	683	34694	Solyc03g007960.3.1;Solyc03g031860.3.1;Solyc04g079960.1.1;Solyc04g050930.3.1;Solyc10g081650.2.1
GO:0031407	oxylipin metabolic process	BIOLOGICAL_PROCESS	0.0130519	0.00013602	683	5	21	683	34694	Solyc01g099150.5.1.1;Solyc01g099160.5.1;Solyc07g049690.3.1;Solyc01g099190.4.1;Solyc01g006540.4.1
GO:0031408	oxylipin biosynthetic process	BIOLOGICAL_PROCESS	0.0130519	0.00013602	683	5	21	683	34694	Solyc01g099150.5.1.1;Solyc01g099160.5.1;Solyc07g049690.3.1;Solyc01g099190.4.1;Solyc01g006540.4.1
GO:0009813	flavonoid biosynthetic process	BIOLOGICAL_PROCESS	0.0135154	0.000142416	683	6	35	683	34694	Solyc08g005760.1.1;Solyc11g013110.2.1;Solyc08g005770.3.1;Solyc03g115220.5.1;Solyc09g091510.3.1;Solyc06g074710.1.1
GO:0010319	stromule	CELLULAR_COMPONENT	0.0136428	0.000145338	683	3	3	683	34694	Solyc09g091070.3.1;Solyc09g011810.3.1;Solyc05g005480.2.1
GO:0090333	regulation of stomatal closure	BIOLOGICAL_PROCESS	0.0158756	0.000170962	683	4	11	683	34694	Solyc01g096740.4.1;Solyc03g059170.3.1;Solyc03g114450.3.1;Solyc01g098190.3.1
GO:0051087	chaperone binding	MOLECULAR_FUNCTION	0.0177202	0.000192879	683	7	54	683	34694	Solyc04g072160.3.1;Solyc07g053615.2.1;Solyc10g081240.3.1;Solyc06g072430.3.1;Solyc10g084170.1.1;Solyc07g042250.3.1;Solyc02g077670.3.1
GO:0006629	lipid metabolic process	BIOLOGICAL_PROCESS	0.0186343	0.000223116	683	40	1057	683	34694	Solyc01g111250.3.1;Solyc10g005080.3.1;Solyc11g072310.2.1;Solyc01g009010.3.1;Solyc01g099150.5.1.1;Solyc03g005020.3.1;Solyc10g081650.2.1;Solyc01g099190.4.1;Solyc11g008680.2.1;Solyc01g099100.4.1;Solyc02g070020.1.1;Solyc01g099160.5.1;Solyc07g049690.3.1;Solyc04g050930.3.1;Solyc02g087430.4.1;Solyc04g054190.3.1;Solyc01g006540.4.1;Solyc03g031860.3.1;Solyc04g078920.3.1;Solyc12g056940.2.1;Solyc02g089160.3.…
GO:0043449	cellular alkene metabolic process	BIOLOGICAL_PROCESS	0.0186343	0.000224406	683	4	12	683	34694	Solyc01g095080.3.1;Solyc05g050010.3.1;Solyc09g089580.4.1;Solyc03g095900.5.1
GO:0043450	alkene biosynthetic process	BIOLOGICAL_PROCESS	0.0186343	0.000224406	683	4	12	683	34694	Solyc01g095080.3.1;Solyc05g050010.3.1;Solyc09g089580.4.1;Solyc03g095900.5.1
GO:0009693	ethylene biosynthetic process	BIOLOGICAL_PROCESS	0.0186343	0.000224406	683	4	12	683	34694	Solyc01g095080.3.1;Solyc05g050010.3.1;Solyc09g089580.4.1;Solyc03g095900.5.1
GO:0009692	ethylene metabolic process	BIOLOGICAL_PROCESS	0.0186343	0.000224406	683	4	12	683	34694	Solyc01g095080.3.1;Solyc05g050010.3.1;Solyc09g089580.4.1;Solyc03g095900.5.1
GO:0034645	cellular macromolecule biosynthetic process	BIOLOGICAL_PROCESS	0.0186343	0.000219279	683	12	1527	683	34694	Solyc08g066690.4.1;Solyc11g068770.1.1;Solyc06g084390.3.1;Solyc08g078650.3.1;Solyc01g095410.3.1;Solyc03g063750.3.1;Solyc05g009370.4.1;Solyc08g078450.3.1;Solyc10g078430.2.1;Solyc03g031850.1.1;Solyc06g071790.3.1;Solyc08g069060.4.1
GO:1990234	transferase complex	CELLULAR_COMPONENT	0.0186343	0.000219667	683	1	581	683	34694	Solyc08g080080.5.1
GO:1900674	olefin biosynthetic process	BIOLOGICAL_PROCESS	0.0186343	0.000224406	683	4	12	683	34694	Solyc01g095080.3.1;Solyc05g050010.3.1;Solyc09g089580.4.1;Solyc03g095900.5.1
GO:1900673	olefin metabolic process	BIOLOGICAL_PROCESS	0.0186343	0.000224406	683	4	12	683	34694	Solyc01g095080.3.1;Solyc05g050010.3.1;Solyc09g089580.4.1;Solyc03g095900.5.1
GO:0044255	cellular lipid metabolic process	BIOLOGICAL_PROCESS	0.0186343	0.000209124	683	31	744	683	34694	Solyc10g005080.3.1;Solyc11g072310.2.1;Solyc01g009010.3.1;Solyc01g099150.5.1.1;Solyc10g081650.2.1;Solyc01g099190.4.1;Solyc11g008680.2.1;Solyc01g099100.4.1;Solyc02g070020.1.1;Solyc01g099160.5.1;Solyc07g049690.3.1;Solyc04g050930.3.1;Solyc02g087430.4.1;Solyc04g054190.3.1;Solyc01g006540.4.1;Solyc03g031860.3.1;Solyc04g078920.3.1;Solyc12g056940.2.1;Solyc09g091470.3.1;Solyc03g007960.3.1;Solyc02g085700.1.…
GO:0043412	macromolecule modification	BIOLOGICAL_PROCESS	0.0190226	0.000231284	683	41	3439	683	34694	Solyc04g012160.4.1;Solyc01g111950.4.1;Solyc06g008330.2.1;Solyc04g082510.3.1;Solyc08g074560.3.1;Solyc07g062970.3.1;Solyc09g007310.3.1;Solyc09g061310.3.1;Solyc08g069060.4.1;Solyc07g051860.1.1;Solyc08g078650.3.1;Solyc11g005200.2.1;Solyc05g013160.4.1;Solyc09g092690.3.1;Solyc04g054190.3.1;Solyc07g051880.1.1;Solyc08g078450.3.1;Solyc12g096430.1.1;Solyc08g066690.4.1;Solyc04g082720.3.1;Solyc07g051870.1.1;…
GO:0030258	lipid modification	BIOLOGICAL_PROCESS	0.0206648	0.000253644	683	9	97	683	34694	Solyc01g099160.5.1;Solyc02g087430.4.1;Solyc10g076600.2.1;Solyc01g006540.4.1;Solyc01g099150.5.1.1;Solyc04g054890.3.1;Solyc04g078920.3.1;Solyc01g099190.4.1;Solyc09g091470.3.1
GO:0009812	flavonoid metabolic process	BIOLOGICAL_PROCESS	0.0220324	0.000272982	683	6	40	683	34694	Solyc08g005760.1.1;Solyc11g013110.2.1;Solyc08g005770.3.1;Solyc03g115220.5.1;Solyc09g091510.3.1;Solyc06g074710.1.1
GO:0090332	stomatal closure	BIOLOGICAL_PROCESS	0.0222758	0.000288894	683	4	13	683	34694	Solyc01g096740.4.1;Solyc03g059170.3.1;Solyc03g114450.3.1;Solyc01g098190.3.1
GO:0031978	plastid thylakoid lumen	CELLULAR_COMPONENT	0.0222758	0.000288894	683	4	13	683	34694	Solyc08g074682.1.1;Solyc07g054290.1.1;Solyc01g106090.3.1;Solyc07g042440.3.1
GO:0009543	chloroplast thylakoid lumen	CELLULAR_COMPONENT	0.0222758	0.000288894	683	4	13	683	34694	Solyc08g074682.1.1;Solyc07g054290.1.1;Solyc01g106090.3.1;Solyc07g042440.3.1
GO:0080043	quercetin 3-O-glucosyltransferase activity	MOLECULAR_FUNCTION	0.0222758	0.000287632	683	7	58	683	34694	Solyc08g006410.5.1;Solyc10g085240.1.1;Solyc10g085230.2.1;Solyc09g092500.1.1;Solyc09g092490.4.1;Solyc08g006330.3.1;Solyc08g006350.3.1
GO:0080044	quercetin 7-O-glucosyltransferase activity	MOLECULAR_FUNCTION	0.0222758	0.000287632	683	7	58	683	34694	Solyc08g006410.5.1;Solyc10g085240.1.1;Solyc10g085230.2.1;Solyc09g092500.1.1;Solyc09g092490.4.1;Solyc08g006330.3.1;Solyc08g006350.3.1
GO:0044183	protein folding chaperone	MOLECULAR_FUNCTION	0.0247566	0.000323934	683	5	26	683	34694	Solyc11g066100.2.1;Solyc04g011440.4.1;Solyc03g117630.1.1;Solyc01g099660.4.1;Solyc09g075950.1.1
GO:0009416	response to light stimulus	BIOLOGICAL_PROCESS	0.0247962	0.000327323	683	16	283	683	34694	Solyc03g059170.3.1;Solyc11g013110.2.1;Solyc11g072310.2.1;Solyc02g078940.3.1;Solyc09g082460.3.1;Solyc03g114450.3.1;Solyc06g076670.3.1;Solyc02g081170.5.1;Solyc11g005190.3.1;Solyc02g084420.3.1;Solyc06g060340.3.1;Solyc01g067530.3.1;Solyc04g078920.3.1;Solyc07g054290.1.1;Solyc12g089240.2.1;Solyc05g010670.3.1
GO:0140513	nuclear protein-containing complex	CELLULAR_COMPONENT	0.0279061	0.000374839	683	4	839	683	34694	Solyc08g066700.3.1;Solyc03g097370.4.1;Solyc06g076670.3.1;Solyc08g080080.5.1
GO:0006259	DNA metabolic process	BIOLOGICAL_PROCESS	0.0279061	0.000373832	683	4	835	683	34694	Solyc03g113100.3.1;Solyc04g082720.3.1;Solyc08g066700.3.1;Solyc10g083630.2.1
GO:0008652	cellular amino acid biosynthetic process	BIOLOGICAL_PROCESS	0.0284877	0.00038595	683	13	203	683	34694	Solyc10g079720.2.1;Solyc09g082460.3.1;Solyc04g009960.3.1;Solyc05g050010.3.1;Solyc11g066890.1.1;Solyc01g095080.3.1;Solyc07g065340.1.1;Solyc01g080280.3.1;Solyc07g017610.3.1;Solyc10g038080.3.1;Solyc01g094790.3.1;Solyc12g088220.2.1;Solyc08g014130.3.1
GO:0019538	protein metabolic process	BIOLOGICAL_PROCESS	0.0299044	0.000408606	683	67	4917	683	34694	Solyc01g087950.3.1;Solyc01g111950.4.1;Solyc03g118340.3.1;Solyc04g082510.3.1;Solyc08g074560.3.1;Solyc05g050570.3.1;Solyc03g020030.3.1;Solyc07g062970.3.1;Solyc07g051860.1.1;Solyc08g078650.3.1;Solyc03g007000.4.1;Solyc05g013160.4.1;Solyc03g111730.3.1;Solyc11g068770.1.1;Solyc01g080410.3.1;Solyc07g051870.1.1;Solyc01g098740.4.1;Solyc03g111830.4.1;Solyc09g008020.4.1;Solyc11g018590.1.1;Solyc06g068990.4.1;…
GO:0003723	RNA binding	MOLECULAR_FUNCTION	0.0309459	0.00042642	683	15	1668	683	34694	Solyc08g066700.3.1;Solyc04g005630.3.1;Solyc05g009370.4.1;Solyc12g017250.2.1;Solyc06g076670.3.1;Solyc12g055930.3.1;Solyc06g060340.3.1;Solyc01g095410.3.1;Solyc03g097370.4.1;Solyc05g055010.4.1;Solyc01g067530.3.1;Solyc02g069570.3.1;Solyc01g099810.3.1;Solyc09g091180.3.1;Solyc06g071790.3.1
GO:0043043	peptide biosynthetic process	BIOLOGICAL_PROCESS	0.0311462	0.000432786	683	5	923	683	34694	Solyc11g068770.1.1;Solyc08g081010.3.1;Solyc01g095410.3.1;Solyc06g071790.3.1;Solyc05g009370.4.1
GO:0006749	glutathione metabolic process	BIOLOGICAL_PROCESS	0.0312777	0.000438236	683	8	83	683	34694	Solyc04g057890.3.1;Solyc08g081010.3.1;Solyc07g056430.3.1;Solyc01g081270.2.1;Solyc07g056420.4.1;Solyc07g056510.3.1;Solyc12g011310.2.1;Solyc01g081250.3.1
GO:0032440	2-alkenal reductase [NAD(P)+] activity	MOLECULAR_FUNCTION	0.0322784	0.000455994	683	4	15	683	34694	Solyc07g045080.3.1;Solyc03g117630.1.1;Solyc07g045090.3.1;Solyc05g005480.2.1
GO:0043604	amide biosynthetic process	BIOLOGICAL_PROCESS	0.0326766	0.000465403	683	6	989	683	34694	Solyc11g068770.1.1;Solyc08g081010.3.1;Solyc01g095410.3.1;Solyc12g056940.2.1;Solyc06g071790.3.1;Solyc05g009370.4.1
GO:0005694	chromosome	CELLULAR_COMPONENT	0.0354818	0.000509465	683	0	418	683	34694
GO:0006139	nucleobase-containing compound metabolic process	BIOLOGICAL_PROCESS	0.0361163	0.000522758	683	68	4957	683	34694	Solyc11g011210.2.1;Solyc12g005060.1.1;Solyc10g005080.3.1;Solyc08g066700.3.1;Solyc03g097120.3.1;Solyc02g021680.3.1;Solyc03g063600.4.1;Solyc12g007180.2.1;Solyc01g111030.2.1;Solyc02g078400.3.1;Solyc08g063040.4.1;Solyc09g066060.4.1;Solyc12g089240.2.1;Solyc02g090820.3.1;Solyc11g068770.1.1;Solyc04g082720.3.1;Solyc09g065850.4.1;Solyc05g012020.2.1;Solyc06g076670.3.1;Solyc11g013470.1.1;Solyc12g055930.3.1;…
GO:0009059	macromolecule biosynthetic process	BIOLOGICAL_PROCESS	0.036824	0.000537265	683	51	3933	683	34694	Solyc11g011210.2.1;Solyc10g005080.3.1;Solyc03g097120.3.1;Solyc02g021680.3.1;Solyc06g084390.3.1;Solyc12g007180.2.1;Solyc08g078650.3.1;Solyc08g063040.4.1;Solyc09g066060.4.1;Solyc12g089240.2.1;Solyc02g090820.3.1;Solyc11g068770.1.1;Solyc09g065850.4.1;Solyc05g012020.2.1;Solyc03g031850.1.1;Solyc11g013470.1.1;Solyc02g084420.3.1;Solyc09g065660.4.1;Solyc02g077920.4.1;Solyc05g010516.1.1;Solyc01g104650.3.1;…
GO:0048471	perinuclear region of cytoplasm	CELLULAR_COMPONENT	0.0379201	0.000583994	683	3	6	683	34694	Solyc03g007890.3.1;Solyc06g036290.3.1;Solyc05g010670.3.1
GO:0030286	dynein complex	CELLULAR_COMPONENT	0.0379201	0.000583994	683	3	6	683	34694	Solyc03g120690.3.1;Solyc12g044240.3.1;Solyc07g063610.5.1
GO:0051959	dynein light intermediate chain binding	MOLECULAR_FUNCTION	0.0379201	0.000583994	683	3	6	683	34694	Solyc03g120690.3.1;Solyc12g044240.3.1;Solyc07g063610.5.1
GO:0009314	response to radiation	BIOLOGICAL_PROCESS	0.0379201	0.000558239	683	16	298	683	34694	Solyc03g059170.3.1;Solyc11g013110.2.1;Solyc11g072310.2.1;Solyc02g078940.3.1;Solyc09g082460.3.1;Solyc03g114450.3.1;Solyc06g076670.3.1;Solyc02g081170.5.1;Solyc11g005190.3.1;Solyc02g084420.3.1;Solyc06g060340.3.1;Solyc01g067530.3.1;Solyc04g078920.3.1;Solyc07g054290.1.1;Solyc12g089240.2.1;Solyc05g010670.3.1
GO:0006986	response to unfolded protein	BIOLOGICAL_PROCESS	0.0379201	0.000580057	683	5	30	683	34694	Solyc11g066100.2.1;Solyc04g011440.4.1;Solyc03g117630.1.1;Solyc01g099660.4.1;Solyc09g075950.1.1
GO:0034620	cellular response to unfolded protein	BIOLOGICAL_PROCESS	0.0379201	0.000580057	683	5	30	683	34694	Solyc11g066100.2.1;Solyc04g011440.4.1;Solyc03g117630.1.1;Solyc01g099660.4.1;Solyc09g075950.1.1
GO:0045505	dynein intermediate chain binding	MOLECULAR_FUNCTION	0.0379201	0.000583994	683	3	6	683	34694	Solyc03g120690.3.1;Solyc12g044240.3.1;Solyc07g063610.5.1
GO:0016705	oxidoreductase activity, acting on paired donors, with incorporation or reduction of molecular oxygen	MOLECULAR_FUNCTION	0.0385673	0.000598427	683	22	487	683	34694	Solyc06g068270.3.1;Solyc11g013110.2.1;Solyc11g072310.2.1;Solyc10g083400.1.1;Solyc10g080840.1.1;Solyc01g088400.4.1;Solyc09g066150.2.1;Solyc02g083860.3.1;Solyc11g008680.2.1;Solyc07g049690.3.1;Solyc11g005200.2.1;Solyc01g108880.4.1;Solyc01g010490.5.1;Solyc03g115220.5.1;Solyc12g088460.3.1;Solyc12g010320.2.1;Solyc10g080870.3.1;Solyc02g065230.3.1;Solyc06g150137.1.1;Solyc03g111970.4.1;Solyc02g089160.3.1;…
GO:0015698	inorganic anion transport	BIOLOGICAL_PROCESS	0.041724	0.000652239	683	17	333	683	34694	Solyc07g008520.3.1;Solyc01g096740.4.1;Solyc03g080020.4.1;Solyc03g120570.3.1;Solyc10g055390.2.1;Solyc01g010760.3.1;Solyc10g024490.2.1;Solyc02g014430.3.1;Solyc02g085170.4.1;Solyc09g013150.4.1;Solyc09g008370.1.1;Solyc07g051950.3.1;Solyc06g066600.3.1;Solyc04g072760.3.1;Solyc06g068600.3.1;Solyc09g090760.4.1;Solyc05g013510.4.1
GO:0005198	structural molecule activity	MOLECULAR_FUNCTION	0.0421476	0.000663742	683	2	614	683	34694	Solyc09g098510.4.1;Solyc05g009370.4.1
GO:0009654	photosystem II oxygen evolving complex	CELLULAR_COMPONENT	0.0427076	0.000682451	683	4	17	683	34694	Solyc12g017250.2.1;Solyc09g064500.3.1;Solyc08g043180.3.1;Solyc01g106090.3.1
GO:0003735	structural constituent of ribosome	MOLECULAR_FUNCTION	0.0427076	0.000680482	683	1	527	683	34694	Solyc05g009370.4.1
GO:1901607	alpha-amino acid biosynthetic process	BIOLOGICAL_PROCESS	0.0439708	0.000707728	683	11	163	683	34694	Solyc01g095080.3.1;Solyc07g065340.1.1;Solyc01g080280.3.1;Solyc07g017610.3.1;Solyc10g079720.2.1;Solyc01g094790.3.1;Solyc09g082460.3.1;Solyc04g009960.3.1;Solyc05g050010.3.1;Solyc11g066890.1.1;Solyc08g014130.3.1
GO:1990904	ribonucleoprotein complex	CELLULAR_COMPONENT	0.0450706	0.000733475	683	4	806	683	34694	Solyc03g097370.4.1;Solyc06g076670.3.1;Solyc01g111030.2.1;Solyc05g009370.4.1
GO:0006464	cellular protein modification process	BIOLOGICAL_PROCESS	0.0450706	0.000746306	683	38	3116	683	34694	Solyc04g012160.4.1;Solyc01g111950.4.1;Solyc06g008330.2.1;Solyc04g082510.3.1;Solyc08g074560.3.1;Solyc07g062970.3.1;Solyc09g007310.3.1;Solyc09g061310.3.1;Solyc08g069060.4.1;Solyc07g051860.1.1;Solyc08g078650.3.1;Solyc11g005200.2.1;Solyc05g013160.4.1;Solyc09g092690.3.1;Solyc04g054190.3.1;Solyc07g051880.1.1;Solyc08g078450.3.1;Solyc12g096430.1.1;Solyc08g066690.4.1;Solyc07g051870.1.1;Solyc01g098740.4.1;…
GO:0036211	protein modification process	BIOLOGICAL_PROCESS	0.0450706	0.000746306	683	38	3116	683	34694	Solyc04g012160.4.1;Solyc01g111950.4.1;Solyc06g008330.2.1;Solyc04g082510.3.1;Solyc08g074560.3.1;Solyc07g062970.3.1;Solyc09g007310.3.1;Solyc09g061310.3.1;Solyc08g069060.4.1;Solyc07g051860.1.1;Solyc08g078650.3.1;Solyc11g005200.2.1;Solyc05g013160.4.1;Solyc09g092690.3.1;Solyc04g054190.3.1;Solyc07g051880.1.1;Solyc08g078450.3.1;Solyc12g096430.1.1;Solyc08g066690.4.1;Solyc07g051870.1.1;Solyc01g098740.4.1;…
GO:0009987	cellular process	BIOLOGICAL_PROCESS	0.0450706	0.000738962	683	358	15611	683	34694	Solyc03g118090.3.1;Solyc03g097120.3.1;Solyc09g089580.4.1;Solyc12g006370.3.1;Solyc01g098190.3.1;Solyc02g070020.1.1;Solyc01g006540.4.1;Solyc02g071080.3.1;Solyc11g065830.2.1;Solyc04g078920.3.1;Solyc03g111730.3.1;Solyc01g106090.3.1;Solyc09g066060.4.1;Solyc12g089240.2.1;Solyc10g051120.3.1;Solyc02g090820.3.1;Solyc04g082720.3.1;Solyc08g081190.3.1;Solyc10g079720.2.1;Solyc09g018070.1.1;Solyc03g117630.1.1;…
GO:0065008	regulation of biological quality	BIOLOGICAL_PROCESS	0.0456643	0.000761424	683	24	560	683	34694	Solyc11g068770.1.1;Solyc08g005770.3.1;Solyc10g080880.2.1;Solyc07g042440.3.1;Solyc06g036290.3.1;Solyc01g067710.3.1;Solyc10g083650.1.1;Solyc02g069430.4.1;Solyc01g096660.3.1;Solyc03g007890.3.1;Solyc01g098190.3.1;Solyc08g081810.3.1;Solyc07g044990.3.1;Solyc04g014670.3.1;Solyc08g005760.1.1;Solyc06g084390.3.1;Solyc02g069420.5.1;Solyc09g010280.3.1;Solyc04g054190.3.1;Solyc07g051950.3.1;Solyc10g079870.3.1;…
GO:1901605	alpha-amino acid metabolic process	BIOLOGICAL_PROCESS	0.0482426	0.000810001	683	15	279	683	34694	Solyc10g079720.2.1;Solyc10g086180.2.1;Solyc09g082460.3.1;Solyc01g090697.1.1;Solyc04g009960.3.1;Solyc05g050010.3.1;Solyc10g007110.3.1;Solyc11g066890.1.1;Solyc01g095080.3.1;Solyc07g065340.1.1;Solyc01g080280.3.1;Solyc07g017610.3.1;Solyc01g094790.3.1;Solyc01g090693.1.1;Solyc08g014130.3.1

## Sheet: Pericarp Down.slim
GO ID	GO Name	GO Category	FDR	-logFDR	P-Value	Total DEGs	DEGs annotated	Genes annotated	Total genes	Genes
GO:0051082	unfolded protein binding	MOLECULAR_FUNCTION	1.68911e-15	14.7723	7.82357e-19	683	27	117	683	34694	Solyc06g076520.1.1;Solyc04g011440.4.1;Solyc03g123540.3.1;Solyc03g007890.3.1;Solyc09g015000.4.1;Solyc03g113930.3.1;Solyc09g075950.1.1;Solyc02g077670.3.1;Solyc02g093600.3.1;Solyc01g099660.4.1;Solyc08g062340.3.1;Solyc12g042830.3.1;Solyc11g071830.2.1;Solyc11g020040.2.1;Solyc04g014480.3.1;Solyc03g117630.1.1;Solyc06g036290.3.1;Solyc07g053615.2.1;Solyc06g076560.2.1;Solyc09g015020.1.1;Solyc11g066100.2.1;…
GO:0051259	protein complex oligomerization	BIOLOGICAL_PROCESS	3.95189e-11	10.4032	3.66086e-14	683	14	28	683	34694	Solyc04g014480.3.1;Solyc06g076520.1.1;Solyc03g123540.3.1;Solyc06g076560.2.1;Solyc09g015020.1.1;Solyc09g015000.4.1;Solyc03g113930.3.1;Solyc07g042250.3.1;Solyc02g093600.3.1;Solyc06g076570.4.1;Solyc01g102960.3.1;Solyc08g062340.3.1;Solyc12g042830.3.1;Solyc11g020330.1.1
GO:0042542	response to hydrogen peroxide	BIOLOGICAL_PROCESS	8.71743e-11	10.0596	9.08486e-14	683	13	23	683	34694	Solyc04g014480.3.1;Solyc06g076520.1.1;Solyc03g123540.3.1;Solyc06g076560.2.1;Solyc09g015020.1.1;Solyc09g015000.4.1;Solyc03g113930.3.1;Solyc02g093600.3.1;Solyc06g076570.4.1;Solyc01g102960.3.1;Solyc08g062340.3.1;Solyc12g042830.3.1;Solyc11g020330.1.1
GO:0043621	protein self-association	MOLECULAR_FUNCTION	1.33428e-10	9.87475	1.54502e-13	683	14	32	683	34694	Solyc04g014480.3.1;Solyc04g014600.3.1;Solyc06g076520.1.1;Solyc03g123540.3.1;Solyc06g076560.2.1;Solyc09g015020.1.1;Solyc09g015000.4.1;Solyc03g113930.3.1;Solyc02g093600.3.1;Solyc06g076570.4.1;Solyc01g102960.3.1;Solyc08g062340.3.1;Solyc12g042830.3.1;Solyc11g020330.1.1
GO:0009651	response to salt stress	BIOLOGICAL_PROCESS	6.72895e-06	5.17205	1.55835e-08	683	15	105	683	34694	Solyc04g014480.3.1;Solyc06g076520.1.1;Solyc03g123540.3.1;Solyc06g076560.2.1;Solyc09g015020.1.1;Solyc09g015000.4.1;Solyc03g113930.3.1;Solyc02g093600.3.1;Solyc01g099100.4.1;Solyc06g076570.4.1;Solyc01g102960.3.1;Solyc08g062340.3.1;Solyc12g042830.3.1;Solyc11g020330.1.1;Solyc05g010670.3.1
GO:0004398	histidine decarboxylase activity	MOLECULAR_FUNCTION	0.000186152	3.73013	7.32883e-07	683	4	1	683	34694	Solyc08g066240.3.1;Solyc08g066250.4.1;Solyc08g066260.3.1;Solyc08g066220.4.1
GO:0042026	protein refolding	BIOLOGICAL_PROCESS	0.000191817	3.71711	7.77398e-07	683	8	31	683	34694	Solyc11g069790.2.1;Solyc04g011440.4.1;Solyc03g117630.1.1;Solyc01g099660.4.1;Solyc11g066100.2.1;Solyc09g091180.3.1;Solyc02g088610.4.1;Solyc09g075950.1.1
GO:0034605	cellular response to heat	BIOLOGICAL_PROCESS	0.000279753	3.55322	1.16618e-06	683	8	33	683	34694	Solyc01g067910.4.1;Solyc03g115230.3.1;Solyc09g065660.4.1;Solyc03g097120.3.1;Solyc03g118340.3.1;Solyc06g036290.3.1;Solyc03g007890.3.1;Solyc02g088610.4.1
GO:0031072	heat shock protein binding	MOLECULAR_FUNCTION	0.000549276	3.26021	2.54412e-06	683	9	51	683	34694	Solyc04g011440.4.1;Solyc04g072160.3.1;Solyc03g117630.1.1;Solyc01g099660.4.1;Solyc09g064380.3.1;Solyc11g066100.2.1;Solyc11g071830.2.1;Solyc09g075950.1.1;Solyc08g079170.3.1
GO:0015994	chlorophyll metabolic process	BIOLOGICAL_PROCESS	0.000615154	3.21102	2.92049e-06	683	8	38	683	34694	Solyc07g054210.3.1;Solyc04g050930.3.1;Solyc08g080090.3.1;Solyc02g070490.4.1;Solyc09g082460.3.1;Solyc01g067890.4.1;Solyc01g088090.3.1;Solyc04g015750.3.1
GO:0009941	chloroplast envelope	CELLULAR_COMPONENT	0.000753086	3.12316	3.66253e-06	683	21	313	683	34694	Solyc03g007960.3.1;Solyc07g054210.3.1;Solyc08g067870.2.1;Solyc12g005410.2.1;Solyc04g072400.4.1;Solyc05g009370.4.1;Solyc04g082250.3.1;Solyc10g081650.2.1;Solyc07g042250.3.1;Solyc03g111610.3.1;Solyc07g049690.3.1;Solyc06g084300.1.1;Solyc03g097370.4.1;Solyc11g067160.2.1;Solyc09g091070.3.1;Solyc01g067530.3.1;Solyc09g014300.3.1;Solyc11g065830.2.1;Solyc09g091180.3.1;Solyc05g010670.3.1;Solyc05g005480.2.1
GO:0046148	pigment biosynthetic process	BIOLOGICAL_PROCESS	0.000837841	3.07684	4.17174e-06	683	11	88	683	34694	Solyc03g007960.3.1;Solyc11g013110.2.1;Solyc04g079960.1.1;Solyc07g054210.3.1;Solyc09g082460.3.1;Solyc03g031860.3.1;Solyc08g074682.1.1;Solyc04g072039.1.1;Solyc10g081650.2.1;Solyc01g067890.4.1;Solyc04g015750.3.1
GO:0051085	chaperone cofactor-dependent protein refolding	BIOLOGICAL_PROCESS	0.000919672	3.03637	4.79217e-06	683	8	41	683	34694	Solyc04g011440.4.1;Solyc03g117630.1.1;Solyc01g099660.4.1;Solyc07g053615.2.1;Solyc11g066100.2.1;Solyc07g042250.3.1;Solyc09g075950.1.1;Solyc02g077670.3.1
GO:0045486	naringenin 3-dioxygenase activity	MOLECULAR_FUNCTION	0.00136678	2.8643	7.59673e-06	683	3	0	683	34694	Solyc01g108880.4.1;Solyc11g013110.2.1;Solyc02g083860.3.1
GO:0016616	oxidoreductase activity, acting on the CH-OH group of donors, NAD or NADP as acceptor	MOLECULAR_FUNCTION	0.00223683	2.65037	1.42457e-05	683	16	213	683	34694	Solyc02g063490.3.1;Solyc01g005560.3.1;Solyc09g082720.3.1;Solyc03g116910.3.1;Solyc05g055700.3.1;Solyc10g018140.2.1;Solyc08g076780.2.1;Solyc11g011340.2.1;Solyc01g068080.4.1;Solyc10g038080.3.1;Solyc03g097170.3.1;Solyc11g067160.2.1;Solyc09g091070.3.1;Solyc08g076790.3.1;Solyc04g078920.3.1;Solyc12g056600.3.1
GO:0034440	lipid oxidation	BIOLOGICAL_PROCESS	0.00232507	2.63356	1.52911e-05	683	8	49	683	34694	Solyc01g099160.5.1;Solyc10g076600.2.1;Solyc01g006540.4.1;Solyc01g099150.5.1.1;Solyc04g054890.3.1;Solyc04g078920.3.1;Solyc01g099190.4.1;Solyc09g091470.3.1
GO:0009535	chloroplast thylakoid membrane	CELLULAR_COMPONENT	0.00232507	2.63356	1.56153e-05	683	23	403	683	34694	Solyc04g010190.1.1;Solyc06g066620.4.1;Solyc12g005060.1.1;Solyc10g085900.3.1;Solyc07g054210.3.1;Solyc04g072400.4.1;Solyc07g042440.3.1;Solyc04g082010.1.1;Solyc03g114450.3.1;Solyc12g017250.2.1;Solyc01g096660.3.1;Solyc09g064500.3.1;Solyc08g043180.3.1;Solyc10g018300.3.1;Solyc02g081170.5.1;Solyc07g042250.3.1;Solyc09g082690.3.1;Solyc06g060340.3.1;Solyc04g050930.3.1;Solyc04g081320.4.1;Solyc07g054290.1.1;…
GO:0005788	endoplasmic reticulum lumen	CELLULAR_COMPONENT	0.002371	2.62507	1.64729e-05	683	7	35	683	34694	Solyc06g084390.3.1;Solyc04g011440.4.1;Solyc03g117630.1.1;Solyc09g005120.3.1;Solyc01g099660.4.1;Solyc11g066100.2.1;Solyc11g020040.2.1
GO:0006631	fatty acid metabolic process	BIOLOGICAL_PROCESS	0.00245839	2.60935	1.76494e-05	683	16	217	683	34694	Solyc10g005080.3.1;Solyc01g099150.5.1.1;Solyc01g104210.3.1;Solyc01g099190.4.1;Solyc11g008680.2.1;Solyc01g099100.4.1;Solyc01g099160.5.1;Solyc07g049690.3.1;Solyc07g064410.1.1;Solyc10g076600.2.1;Solyc01g006540.4.1;Solyc03g097470.3.1;Solyc04g054890.3.1;Solyc04g078920.3.1;Solyc12g056940.2.1;Solyc09g091470.3.1
GO:0009704	de-etiolation	BIOLOGICAL_PROCESS	0.00404005	2.39361	2.99402e-05	683	3	1	683	34694	Solyc03g059170.3.1;Solyc03g114450.3.1;Solyc05g010670.3.1
GO:0019842	vitamin binding	MOLECULAR_FUNCTION	0.00619219	2.20816	5.30595e-05	683	19	321	683	34694	Solyc06g068270.3.1;Solyc11g013110.2.1;Solyc08g066240.3.1;Solyc11g072310.2.1;Solyc10g079720.2.1;Solyc09g089580.4.1;Solyc09g089740.3.1;Solyc05g050010.3.1;Solyc09g089720.4.1;Solyc10g007110.3.1;Solyc02g083860.3.1;Solyc08g066220.4.1;Solyc04g054310.3.1;Solyc01g095080.3.1;Solyc11g005200.2.1;Solyc08g066250.4.1;Solyc01g108880.4.1;Solyc03g095900.5.1;Solyc08g066260.3.1
GO:0009570	chloroplast stroma	CELLULAR_COMPONENT	0.00644521	2.19076	5.59739e-05	683	21	380	683	34694	Solyc08g007010.4.1;Solyc05g009370.4.1;Solyc10g085040.1.1;Solyc09g064500.3.1;Solyc11g066890.1.1;Solyc07g042250.3.1;Solyc11g008680.2.1;Solyc03g111610.3.1;Solyc03g097370.4.1;Solyc12g007010.2.1;Solyc09g011810.3.1;Solyc01g006540.4.1;Solyc11g067160.2.1;Solyc09g091070.3.1;Solyc01g067530.3.1;Solyc01g106090.3.1;Solyc09g091180.3.1;Solyc07g062060.3.1;Solyc03g117890.3.1;Solyc05g010670.3.1;Solyc05g005480.2.1
GO:0098656	anion transmembrane transport	BIOLOGICAL_PROCESS	0.00725811	2.13918	6.38741e-05	683	11	121	683	34694	Solyc01g096740.4.1;Solyc02g070280.3.1;Solyc06g061170.3.1;Solyc12g056620.2.1;Solyc01g067710.3.1;Solyc04g072760.3.1;Solyc06g068600.3.1;Solyc01g010760.3.1;Solyc05g013510.4.1;Solyc01g098190.3.1;Solyc10g051120.3.1
GO:0009835	fruit ripening	BIOLOGICAL_PROCESS	0.00790505	2.1021	7.30611e-05	683	5	18	683	34694	Solyc01g095080.3.1;Solyc05g050010.3.1;Solyc10g080210.2.1;Solyc09g089580.4.1;Solyc03g095900.5.1
GO:0005777	peroxisome	CELLULAR_COMPONENT	0.00790505	2.1021	7.32288e-05	683	11	123	683	34694	Solyc07g047800.3.1;Solyc01g099100.4.1;Solyc04g014480.3.1;Solyc06g076690.4.1;Solyc10g076600.2.1;Solyc12g006370.3.1;Solyc04g054890.3.1;Solyc04g078920.3.1;Solyc07g043590.3.1;Solyc09g091470.3.1;Solyc04g014670.3.1
GO:0051787	misfolded protein binding	MOLECULAR_FUNCTION	0.00944727	2.02469	9.0797e-05	683	5	19	683	34694	Solyc11g066100.2.1;Solyc04g011440.4.1;Solyc03g117630.1.1;Solyc01g099660.4.1;Solyc09g075950.1.1
GO:0006412	translation	BIOLOGICAL_PROCESS	0.010275	1.98822	9.99423e-05	683	4	921	683	34694	Solyc11g068770.1.1;Solyc01g095410.3.1;Solyc06g071790.3.1;Solyc05g009370.4.1
GO:0051276	chromosome organization	BIOLOGICAL_PROCESS	0.0104586	1.98053	0.000102939	683	1	612	683	34694	Solyc03g097370.4.1
GO:0008509	anion transmembrane transporter activity	MOLECULAR_FUNCTION	0.0113085	1.9466	0.000112614	683	12	153	683	34694	Solyc01g096740.4.1;Solyc03g118090.3.1;Solyc02g070280.3.1;Solyc06g061170.3.1;Solyc07g051950.3.1;Solyc12g056620.2.1;Solyc01g067710.3.1;Solyc04g072760.3.1;Solyc06g068600.3.1;Solyc01g010760.3.1;Solyc01g098190.3.1;Solyc10g051120.3.1
GO:0016116	carotenoid metabolic process	BIOLOGICAL_PROCESS	0.0130519	1.88433	0.00013602	683	5	21	683	34694	Solyc03g007960.3.1;Solyc03g031860.3.1;Solyc04g079960.1.1;Solyc04g050930.3.1;Solyc10g081650.2.1
GO:0031408	oxylipin biosynthetic process	BIOLOGICAL_PROCESS	0.0130519	1.88433	0.00013602	683	5	21	683	34694	Solyc01g099150.5.1.1;Solyc01g099160.5.1;Solyc07g049690.3.1;Solyc01g099190.4.1;Solyc01g006540.4.1
GO:0009813	flavonoid biosynthetic process	BIOLOGICAL_PROCESS	0.0135154	1.86917	0.000142416	683	6	35	683	34694	Solyc08g005760.1.1;Solyc11g013110.2.1;Solyc08g005770.3.1;Solyc03g115220.5.1;Solyc09g091510.3.1;Solyc06g074710.1.1
GO:0010319	stromule	CELLULAR_COMPONENT	0.0136428	1.8651	0.000145338	683	3	3	683	34694	Solyc09g091070.3.1;Solyc09g011810.3.1;Solyc05g005480.2.1
GO:0090333	regulation of stomatal closure	BIOLOGICAL_PROCESS	0.0158756	1.79927	0.000170962	683	4	11	683	34694	Solyc01g096740.4.1;Solyc03g059170.3.1;Solyc03g114450.3.1;Solyc01g098190.3.1
GO:0051087	chaperone binding	MOLECULAR_FUNCTION	0.0177202	1.75153	0.000192879	683	7	54	683	34694	Solyc04g072160.3.1;Solyc07g053615.2.1;Solyc10g081240.3.1;Solyc06g072430.3.1;Solyc10g084170.1.1;Solyc07g042250.3.1;Solyc02g077670.3.1
GO:0009693	ethylene biosynthetic process	BIOLOGICAL_PROCESS	0.0186343	1.72969	0.000224406	683	4	12	683	34694	Solyc01g095080.3.1;Solyc05g050010.3.1;Solyc09g089580.4.1;Solyc03g095900.5.1
GO:1990234	transferase complex	CELLULAR_COMPONENT	0.0186343	1.72969	0.000219667	683	1	581	683	34694	Solyc08g080080.5.1
GO:0080043	quercetin 3-O-glucosyltransferase activity	MOLECULAR_FUNCTION	0.0222758	1.65217	0.000287632	683	7	58	683	34694	Solyc08g006410.5.1;Solyc10g085240.1.1;Solyc10g085230.2.1;Solyc09g092500.1.1;Solyc09g092490.4.1;Solyc08g006330.3.1;Solyc08g006350.3.1
GO:0080044	quercetin 7-O-glucosyltransferase activity	MOLECULAR_FUNCTION	0.0222758	1.65217	0.000287632	683	7	58	683	34694	Solyc08g006410.5.1;Solyc10g085240.1.1;Solyc10g085230.2.1;Solyc09g092500.1.1;Solyc09g092490.4.1;Solyc08g006330.3.1;Solyc08g006350.3.1
GO:0009543	chloroplast thylakoid lumen	CELLULAR_COMPONENT	0.0222758	1.65217	0.000288894	683	4	13	683	34694	Solyc08g074682.1.1;Solyc07g054290.1.1;Solyc01g106090.3.1;Solyc07g042440.3.1
GO:0044183	protein folding chaperone	MOLECULAR_FUNCTION	0.0247566	1.60631	0.000323934	683	5	26	683	34694	Solyc11g066100.2.1;Solyc04g011440.4.1;Solyc03g117630.1.1;Solyc01g099660.4.1;Solyc09g075950.1.1
GO:0006259	DNA metabolic process	BIOLOGICAL_PROCESS	0.0279061	1.5543	0.000373832	683	4	835	683	34694	Solyc03g113100.3.1;Solyc04g082720.3.1;Solyc08g066700.3.1;Solyc10g083630.2.1
GO:0140513	nuclear protein-containing complex	CELLULAR_COMPONENT	0.0279061	1.5543	0.000374839	683	4	839	683	34694	Solyc08g066700.3.1;Solyc03g097370.4.1;Solyc06g076670.3.1;Solyc08g080080.5.1
GO:0003723	RNA binding	MOLECULAR_FUNCTION	0.0309459	1.5094	0.00042642	683	15	1668	683	34694	Solyc08g066700.3.1;Solyc04g005630.3.1;Solyc05g009370.4.1;Solyc12g017250.2.1;Solyc06g076670.3.1;Solyc12g055930.3.1;Solyc06g060340.3.1;Solyc01g095410.3.1;Solyc03g097370.4.1;Solyc05g055010.4.1;Solyc01g067530.3.1;Solyc02g069570.3.1;Solyc01g099810.3.1;Solyc09g091180.3.1;Solyc06g071790.3.1
GO:0006749	glutathione metabolic process	BIOLOGICAL_PROCESS	0.0312777	1.50477	0.000438236	683	8	83	683	34694	Solyc04g057890.3.1;Solyc08g081010.3.1;Solyc07g056430.3.1;Solyc01g081270.2.1;Solyc07g056420.4.1;Solyc07g056510.3.1;Solyc12g011310.2.1;Solyc01g081250.3.1
GO:0032440	2-alkenal reductase [NAD(P)+] activity	MOLECULAR_FUNCTION	0.0322784	1.49109	0.000455994	683	4	15	683	34694	Solyc07g045080.3.1;Solyc03g117630.1.1;Solyc07g045090.3.1;Solyc05g005480.2.1
GO:0005694	chromosome	CELLULAR_COMPONENT	0.0354818	1.44999	0.000509465	683	0	418	683	34694
GO:0034620	cellular response to unfolded protein	BIOLOGICAL_PROCESS	0.0379201	1.42113	0.000580057	683	5	30	683	34694	Solyc11g066100.2.1;Solyc04g011440.4.1;Solyc03g117630.1.1;Solyc01g099660.4.1;Solyc09g075950.1.1
GO:0051959	dynein light intermediate chain binding	MOLECULAR_FUNCTION	0.0379201	1.42113	0.000583994	683	3	6	683	34694	Solyc03g120690.3.1;Solyc12g044240.3.1;Solyc07g063610.5.1
GO:0045505	dynein intermediate chain binding	MOLECULAR_FUNCTION	0.0379201	1.42113	0.000583994	683	3	6	683	34694	Solyc03g120690.3.1;Solyc12g044240.3.1;Solyc07g063610.5.1
GO:0030286	dynein complex	CELLULAR_COMPONENT	0.0379201	1.42113	0.000583994	683	3	6	683	34694	Solyc03g120690.3.1;Solyc12g044240.3.1;Solyc07g063610.5.1
GO:0048471	perinuclear region of cytoplasm	CELLULAR_COMPONENT	0.0379201	1.42113	0.000583994	683	3	6	683	34694	Solyc03g007890.3.1;Solyc06g036290.3.1;Solyc05g010670.3.1
GO:0015698	inorganic anion transport	BIOLOGICAL_PROCESS	0.041724	1.37961	0.000652239	683	17	333	683	34694	Solyc07g008520.3.1;Solyc01g096740.4.1;Solyc03g080020.4.1;Solyc03g120570.3.1;Solyc10g055390.2.1;Solyc01g010760.3.1;Solyc10g024490.2.1;Solyc02g014430.3.1;Solyc02g085170.4.1;Solyc09g013150.4.1;Solyc09g008370.1.1;Solyc07g051950.3.1;Solyc06g066600.3.1;Solyc04g072760.3.1;Solyc06g068600.3.1;Solyc09g090760.4.1;Solyc05g013510.4.1
GO:0003735	structural constituent of ribosome	MOLECULAR_FUNCTION	0.0427076	1.3695	0.000680482	683	1	527	683	34694	Solyc05g009370.4.1
GO:0009654	photosystem II oxygen evolving complex	CELLULAR_COMPONENT	0.0427076	1.3695	0.000682451	683	4	17	683	34694	Solyc12g017250.2.1;Solyc09g064500.3.1;Solyc08g043180.3.1;Solyc01g106090.3.1
GO:1901607	alpha-amino acid biosynthetic process	BIOLOGICAL_PROCESS	0.0439708	1.35684	0.000707728	683	11	163	683	34694	Solyc01g095080.3.1;Solyc07g065340.1.1;Solyc01g080280.3.1;Solyc07g017610.3.1;Solyc10g079720.2.1;Solyc01g094790.3.1;Solyc09g082460.3.1;Solyc04g009960.3.1;Solyc05g050010.3.1;Solyc11g066890.1.1;Solyc08g014130.3.1
GO:0006464	cellular protein modification process	BIOLOGICAL_PROCESS	0.0450706	1.34611	0.000746306	683	38	3116	683	34694	Solyc04g012160.4.1;Solyc01g111950.4.1;Solyc06g008330.2.1;Solyc04g082510.3.1;Solyc08g074560.3.1;Solyc07g062970.3.1;Solyc09g007310.3.1;Solyc09g061310.3.1;Solyc08g069060.4.1;Solyc07g051860.1.1;Solyc08g078650.3.1;Solyc11g005200.2.1;Solyc05g013160.4.1;Solyc09g092690.3.1;Solyc04g054190.3.1;Solyc07g051880.1.1;Solyc08g078450.3.1;Solyc12g096430.1.1;Solyc08g066690.4.1;Solyc07g051870.1.1;Solyc01g098740.4.1;…
GO:1990904	ribonucleoprotein complex	CELLULAR_COMPONENT	0.0450706	1.34611	0.000733475	683	4	806	683	34694	Solyc03g097370.4.1;Solyc06g076670.3.1;Solyc01g111030.2.1;Solyc05g009370.4.1
GO:0065008	regulation of biological quality	BIOLOGICAL_PROCESS	0.0456643	1.34042	0.000761424	683	24	560	683	34694	Solyc11g068770.1.1;Solyc08g005770.3.1;Solyc10g080880.2.1;Solyc07g042440.3.1;Solyc06g036290.3.1;Solyc01g067710.3.1;Solyc10g083650.1.1;Solyc02g069430.4.1;Solyc01g096660.3.1;Solyc03g007890.3.1;Solyc01g098190.3.1;Solyc08g081810.3.1;Solyc07g044990.3.1;Solyc04g014670.3.1;Solyc08g005760.1.1;Solyc06g084390.3.1;Solyc02g069420.5.1;Solyc09g010280.3.1;Solyc04g054190.3.1;Solyc07g051950.3.1;Solyc10g079870.3.1;…

## Sheet: Locule_up.full
GO ID	GO Name	GO Category	FDR	P-Value	Total DEGs	DEGs annotated	Genes annotated	Total genes	Genes
GO:0031224	intrinsic component of membrane	CELLULAR_COMPONENT	1.96208e-15	2.27197e-19	714	268	7615	34694	Solyc07g043630.2.1;Solyc06g068240.3.1;Solyc04g074290.3.1;Solyc03g097570.3.1;Solyc04g083150.2.1;Solyc01g112140.5.1;Solyc06g068720.3.1;Solyc01g081586.1.1;Solyc10g085950.2.1;Solyc03g119990.4.1;Solyc02g071080.3.1;Solyc01g065500.3.1;Solyc01g005690.4.1;Solyc07g054850.3.1;Solyc02g080660.3.1;Solyc03g043930.4.1;Solyc05g053860.5.1;Solyc01g080130.2.1;Solyc12g005880.2.1;Solyc06g048950.3.1;Solyc11g072040.2.1;…
GO:0016021	integral component of membrane	CELLULAR_COMPONENT	6.24211e-15	1.4456e-18	714	264	7552	34694	Solyc07g043630.2.1;Solyc06g068240.3.1;Solyc04g074290.3.1;Solyc03g097570.3.1;Solyc04g083150.2.1;Solyc01g112140.5.1;Solyc06g068720.3.1;Solyc01g081586.1.1;Solyc10g085950.2.1;Solyc03g119990.4.1;Solyc02g071080.3.1;Solyc01g065500.3.1;Solyc01g005690.4.1;Solyc07g054850.3.1;Solyc03g043930.4.1;Solyc05g053860.5.1;Solyc01g080130.2.1;Solyc12g005880.2.1;Solyc06g048950.3.1;Solyc11g072040.2.1;Solyc05g055470.4.1;…
GO:0110165	cellular anatomical entity	CELLULAR_COMPONENT	7.08192e-14	2.46014e-17	714	504	18664	34694	Solyc06g068240.3.1;Solyc05g054480.3.1;Solyc08g080540.3.1;Solyc06g050130.3.1;Solyc10g085950.2.1;Solyc04g161850.1.1;Solyc02g071080.3.1;Solyc01g065500.3.1;Solyc01g005690.4.1;Solyc11g045610.2.1;Solyc06g076660.3.1;Solyc07g054850.3.1;Solyc02g077480.1.1;Solyc12g014410.2.1;Solyc01g080130.2.1;Solyc11g066100.2.1;Solyc12g005880.2.1;Solyc06g062430.3.1;Solyc10g006480.2.1;Solyc01g008440.3.1;Solyc11g072040.2.1;…
GO:0016020	membrane	CELLULAR_COMPONENT	1.86887e-12	8.65617e-16	714	305	9664	34694	Solyc07g043630.2.1;Solyc06g068240.3.1;Solyc04g074290.3.1;Solyc03g097570.3.1;Solyc04g083150.2.1;Solyc01g112140.5.1;Solyc06g068720.3.1;Solyc01g081586.1.1;Solyc10g085950.2.1;Solyc03g119990.4.1;Solyc02g071080.3.1;Solyc01g065500.3.1;Solyc01g096360.3.1;Solyc01g005690.4.1;Solyc07g054850.3.1;Solyc02g080660.3.1;Solyc03g043930.4.1;Solyc05g053860.5.1;Solyc01g080130.2.1;Solyc12g005880.2.1;Solyc06g048950.3.1;…
GO:0006457	protein folding	BIOLOGICAL_PROCESS	6.53978e-11	3.78635e-14	714	29	215	34694	Solyc07g008800.5.1;Solyc06g083190.4.1;Solyc04g011440.4.1;Solyc03g123540.3.1;Solyc03g007890.3.1;Solyc09g075950.1.1;Solyc02g077670.3.1;Solyc11g069790.2.1;Solyc03g082920.4.1;Solyc06g076020.3.1;Solyc08g062340.3.1;Solyc05g018700.4.1;Solyc12g042830.3.1;Solyc11g071830.2.1;Solyc11g066060.4.1;Solyc04g011450.2.1;Solyc06g036290.3.1;Solyc06g072430.3.1;Solyc12g015880.2.1;Solyc01g108340.3.1;Solyc11g066100.2.1;…
GO:0051082	unfolded protein binding	MOLECULAR_FUNCTION	3.4489e-09	2.39618e-12	714	21	123	34694	Solyc07g008800.5.1;Solyc04g011450.2.1;Solyc04g011440.4.1;Solyc06g036290.3.1;Solyc07g065745.1.1;Solyc03g123540.3.1;Solyc12g015880.2.1;Solyc03g007890.3.1;Solyc11g066100.2.1;Solyc03g007650.2.1;Solyc09g075950.1.1;Solyc02g077670.3.1;Solyc01g106210.3.1;Solyc05g056390.2.1;Solyc03g082920.4.1;Solyc12g014470.2.1;Solyc06g076020.3.1;Solyc08g062340.3.1;Solyc12g042830.3.1;Solyc11g071830.2.1;Solyc11g066060.4.1
GO:0042026	protein refolding	BIOLOGICAL_PROCESS	2.22754e-07	2.57937e-10	714	11	28	34694	Solyc01g106210.3.1;Solyc11g069790.2.1;Solyc04g011450.2.1;Solyc04g011440.4.1;Solyc05g053470.3.1;Solyc03g082920.4.1;Solyc06g076020.3.1;Solyc11g066100.2.1;Solyc02g088610.4.1;Solyc09g075950.1.1;Solyc11g066060.4.1
GO:0051084	'de novo' posttranslational protein folding	BIOLOGICAL_PROCESS	2.22754e-07	2.42239e-10	714	12	37	34694	Solyc01g106210.3.1;Solyc07g008800.5.1;Solyc04g011450.2.1;Solyc04g011440.4.1;Solyc05g056390.2.1;Solyc03g082920.4.1;Solyc06g076020.3.1;Solyc11g066100.2.1;Solyc03g007650.2.1;Solyc09g075950.1.1;Solyc11g066060.4.1;Solyc02g077670.3.1
GO:0051085	chaperone cofactor-dependent protein refolding	BIOLOGICAL_PROCESS	2.22754e-07	2.42239e-10	714	12	37	34694	Solyc01g106210.3.1;Solyc07g008800.5.1;Solyc04g011450.2.1;Solyc04g011440.4.1;Solyc05g056390.2.1;Solyc03g082920.4.1;Solyc06g076020.3.1;Solyc11g066100.2.1;Solyc03g007650.2.1;Solyc09g075950.1.1;Solyc11g066060.4.1;Solyc02g077670.3.1
GO:0071944	cell periphery	CELLULAR_COMPONENT	2.22754e-07	2.44862e-10	714	99	2383	34694	Solyc03g097570.3.1;Solyc07g063820.3.1;Solyc01g081586.1.1;Solyc06g050130.3.1;Solyc10g085950.2.1;Solyc03g007950.3.1;Solyc01g065500.3.1;Solyc01g096360.3.1;Solyc02g080660.3.1;Solyc09g014160.3.1;Solyc10g006870.1.1;Solyc10g084250.1.1;Solyc06g048950.3.1;Solyc01g008440.3.1;Solyc05g014000.5.1;Solyc12g055840.2.1;Solyc06g083750.3.1;Solyc12g056920.3.1;Solyc11g006040.2.1;Solyc05g005960.3.1;Solyc05g024260.3.1;…
GO:0061077	chaperone-mediated protein folding	BIOLOGICAL_PROCESS	5.14373e-07	6.55176e-10	714	13	52	34694	Solyc07g008800.5.1;Solyc06g083190.4.1;Solyc04g011450.2.1;Solyc04g011440.4.1;Solyc11g066100.2.1;Solyc03g007650.2.1;Solyc09g075950.1.1;Solyc02g077670.3.1;Solyc01g106210.3.1;Solyc05g056390.2.1;Solyc03g082920.4.1;Solyc06g076020.3.1;Solyc11g066060.4.1
GO:0006458	'de novo' protein folding	BIOLOGICAL_PROCESS	5.89984e-07	8.19802e-10	714	12	42	34694	Solyc01g106210.3.1;Solyc07g008800.5.1;Solyc04g011450.2.1;Solyc04g011440.4.1;Solyc05g056390.2.1;Solyc03g082920.4.1;Solyc06g076020.3.1;Solyc11g066100.2.1;Solyc03g007650.2.1;Solyc09g075950.1.1;Solyc11g066060.4.1;Solyc02g077670.3.1
GO:0005886	plasma membrane	CELLULAR_COMPONENT	1.26998e-06	1.91173e-09	714	85	1988	34694	Solyc04g025600.3.1;Solyc03g097570.3.1;Solyc08g083310.3.1;Solyc02g070000.4.1;Solyc04g076450.1.1;Solyc07g063820.3.1;Solyc04g071650.4.1;Solyc02g088380.4.1;Solyc07g045440.1.1;Solyc01g081586.1.1;Solyc10g081230.3.1;Solyc10g081910.2.1;Solyc10g085950.2.1;Solyc04g071000.1.1;Solyc01g065500.3.1;Solyc01g096360.3.1;Solyc02g077630.3.1;Solyc02g080660.3.1;Solyc08g081940.3.1;Solyc09g014160.3.1;Solyc03g019760.4.1;…
GO:0000786	nucleosome	CELLULAR_COMPONENT	1.5541e-06	2.51938e-09	714	15	86	34694	Solyc06g074790.3.1;Solyc10g008910.1.1;Solyc01g079110.5.1;Solyc02g077480.1.1;Solyc11g073260.2.1;Solyc01g074000.4.1;Solyc06g075800.1.1;Solyc01g086820.5.1;Solyc06g075850.1.1;Solyc01g099410.3.1;Solyc11g072860.2.1;Solyc11g066160.1.1;Solyc05g054610.1.1;Solyc11g066430.3.1;Solyc04g011390.1.1
GO:0044815	DNA packaging complex	CELLULAR_COMPONENT	2.51515e-06	4.36859e-09	714	15	90	34694	Solyc06g074790.3.1;Solyc10g008910.1.1;Solyc01g079110.5.1;Solyc02g077480.1.1;Solyc11g073260.2.1;Solyc01g074000.4.1;Solyc06g075800.1.1;Solyc01g086820.5.1;Solyc06g075850.1.1;Solyc01g099410.3.1;Solyc11g072860.2.1;Solyc11g066160.1.1;Solyc05g054610.1.1;Solyc11g066430.3.1;Solyc04g011390.1.1
GO:0005515	protein binding	MOLECULAR_FUNCTION	5.07406e-06	9.40076e-09	714	86	2108	34694	Solyc03g113680.4.1;Solyc04g025600.3.1;Solyc04g011440.4.1;Solyc11g073260.2.1;Solyc03g123540.3.1;Solyc09g059970.3.1;Solyc02g091690.3.1;Solyc12g014490.3.1;Solyc05g052950.5.1;Solyc09g090090.2.1;Solyc09g150121.1.1;Solyc01g020150.4.1;Solyc03g082920.4.1;Solyc11g072860.2.1;Solyc02g077630.3.1;Solyc12g042830.3.1;Solyc02g076710.3.1;Solyc02g088580.1.1;Solyc11g066060.4.1;Solyc04g011390.1.1;Solyc08g081100.5.1;…
GO:0005788	endoplasmic reticulum lumen	CELLULAR_COMPONENT	5.28233e-06	1.03983e-08	714	10	32	34694	Solyc01g106210.3.1;Solyc04g011450.2.1;Solyc04g011440.4.1;Solyc09g005120.3.1;Solyc07g043560.4.1;Solyc03g082920.4.1;Solyc06g076020.3.1;Solyc05g018700.4.1;Solyc11g066100.2.1;Solyc11g066060.4.1
GO:0051787	misfolded protein binding	MOLECULAR_FUNCTION	7.7315e-06	1.701e-08	714	8	16	34694	Solyc01g106210.3.1;Solyc04g011450.2.1;Solyc04g011440.4.1;Solyc03g082920.4.1;Solyc06g076020.3.1;Solyc11g066100.2.1;Solyc09g075950.1.1;Solyc11g066060.4.1
GO:0046982	protein heterodimerization activity	MOLECULAR_FUNCTION	7.7315e-06	1.65843e-08	714	17	134	34694	Solyc06g074790.3.1;Solyc10g008910.1.1;Solyc01g079110.5.1;Solyc02g077480.1.1;Solyc11g073260.2.1;Solyc01g074000.4.1;Solyc06g075800.1.1;Solyc01g086820.5.1;Solyc05g016715.1.1;Solyc06g075850.1.1;Solyc05g018120.2.1;Solyc01g099410.3.1;Solyc11g072860.2.1;Solyc11g066160.1.1;Solyc05g054610.1.1;Solyc11g066430.3.1;Solyc04g011390.1.1
GO:0009408	response to heat	BIOLOGICAL_PROCESS	4.88505e-05	1.13132e-07	714	14	101	34694	Solyc03g115230.3.1;Solyc06g036290.3.1;Solyc03g123540.3.1;Solyc01g104740.3.1;Solyc12g015880.2.1;Solyc03g007890.3.1;Solyc06g082560.3.1;Solyc09g065660.4.1;Solyc09g005120.3.1;Solyc02g072000.3.1;Solyc08g062340.3.1;Solyc12g042830.3.1;Solyc11g071830.2.1;Solyc02g088610.4.1
GO:0044183	protein folding chaperone	MOLECULAR_FUNCTION	6.60629e-05	1.60644e-07	714	8	23	34694	Solyc01g106210.3.1;Solyc04g011450.2.1;Solyc04g011440.4.1;Solyc03g082920.4.1;Solyc06g076020.3.1;Solyc11g066100.2.1;Solyc09g075950.1.1;Solyc11g066060.4.1
GO:0032993	protein-DNA complex	CELLULAR_COMPONENT	0.000114589	2.91912e-07	714	15	128	34694	Solyc06g074790.3.1;Solyc10g008910.1.1;Solyc01g079110.5.1;Solyc02g077480.1.1;Solyc11g073260.2.1;Solyc01g074000.4.1;Solyc06g075800.1.1;Solyc01g086820.5.1;Solyc06g075850.1.1;Solyc01g099410.3.1;Solyc11g072860.2.1;Solyc11g066160.1.1;Solyc05g054610.1.1;Solyc11g066430.3.1;Solyc04g011390.1.1
GO:0031072	heat shock protein binding	MOLECULAR_FUNCTION	0.000143342	3.81759e-07	714	10	50	34694	Solyc01g106210.3.1;Solyc04g011450.2.1;Solyc04g011440.4.1;Solyc03g082920.4.1;Solyc09g064380.3.1;Solyc06g076020.3.1;Solyc11g066100.2.1;Solyc11g071830.2.1;Solyc09g075950.1.1;Solyc11g066060.4.1
GO:0006986	response to unfolded protein	BIOLOGICAL_PROCESS	0.00015396	4.45694e-07	714	8	27	34694	Solyc01g106210.3.1;Solyc04g011450.2.1;Solyc04g011440.4.1;Solyc03g082920.4.1;Solyc06g076020.3.1;Solyc11g066100.2.1;Solyc09g075950.1.1;Solyc11g066060.4.1
GO:0034620	cellular response to unfolded protein	BIOLOGICAL_PROCESS	0.00015396	4.45694e-07	714	8	27	34694	Solyc01g106210.3.1;Solyc04g011450.2.1;Solyc04g011440.4.1;Solyc03g082920.4.1;Solyc06g076020.3.1;Solyc11g066100.2.1;Solyc09g075950.1.1;Solyc11g066060.4.1
GO:0000785	chromatin	CELLULAR_COMPONENT	0.00015624	4.82124e-07	714	18	194	34694	Solyc06g074790.3.1;Solyc10g008910.1.1;Solyc07g005020.3.1;Solyc01g079110.5.1;Solyc02g077480.1.1;Solyc11g073260.2.1;Solyc01g074000.4.1;Solyc06g075800.1.1;Solyc01g086820.5.1;Solyc01g110130.3.1;Solyc06g075850.1.1;Solyc04g161850.1.1;Solyc01g099410.3.1;Solyc11g072860.2.1;Solyc11g066160.1.1;Solyc05g054610.1.1;Solyc11g066430.3.1;Solyc04g011390.1.1
GO:0035966	response to topologically incorrect protein	BIOLOGICAL_PROCESS	0.00015624	5.24659e-07	714	10	52	34694	Solyc01g106210.3.1;Solyc04g011450.2.1;Solyc04g011440.4.1;Solyc02g065540.3.1;Solyc03g082920.4.1;Solyc06g076020.3.1;Solyc05g007895.1.1;Solyc11g066100.2.1;Solyc09g075950.1.1;Solyc11g066060.4.1
GO:0035967	cellular response to topologically incorrect protein	BIOLOGICAL_PROCESS	0.00015624	5.24659e-07	714	10	52	34694	Solyc01g106210.3.1;Solyc04g011450.2.1;Solyc04g011440.4.1;Solyc02g065540.3.1;Solyc03g082920.4.1;Solyc06g076020.3.1;Solyc05g007895.1.1;Solyc11g066100.2.1;Solyc09g075950.1.1;Solyc11g066060.4.1
GO:0005975	carbohydrate metabolic process	BIOLOGICAL_PROCESS	0.00015624	5.12144e-07	714	50	1076	34694	Solyc04g074290.3.1;Solyc08g083310.3.1;Solyc04g071650.4.1;Solyc03g113030.5.1;Solyc01g020130.3.1;Solyc01g081586.1.1;Solyc06g050130.3.1;Solyc06g072740.1.1;Solyc04g016330.3.1;Solyc03g007950.3.1;Solyc01g020150.4.1;Solyc03g071570.3.1;Solyc09g092130.3.1;Solyc01g005690.4.1;Solyc09g092520.3.1;Solyc03g116230.4.1;Solyc03g114910.5.1;Solyc12g100120.2.1;Solyc08g078540.3.1;Solyc06g062430.3.1;Solyc05g014000.5.1;…
GO:0016757	glycosyltransferase activity	MOLECULAR_FUNCTION	0.000343882	1.19459e-06	714	37	709	34694	Solyc01g094170.3.1;Solyc12g098600.1.1;Solyc05g006510.3.1;Solyc05g008260.3.1;Solyc01g079170.3.1;Solyc04g008210.2.1;Solyc08g081420.4.1;Solyc01g086640.2.1;Solyc04g071650.4.1;Solyc08g041770.3.1;Solyc11g010740.3.1;Solyc03g031800.3.1;Solyc01g020130.3.1;Solyc01g081586.1.1;Solyc10g085870.1.1;Solyc04g045650.3.1;Solyc01g020150.4.1;Solyc09g092130.3.1;Solyc09g092520.3.1;Solyc06g036640.4.1;Solyc02g085660.1.1;…
GO:0034605	cellular response to heat	BIOLOGICAL_PROCESS	0.000452073	1.62277e-06	714	8	33	34694	Solyc03g115230.3.1;Solyc06g082560.3.1;Solyc09g065660.4.1;Solyc06g036290.3.1;Solyc02g072000.3.1;Solyc12g015880.2.1;Solyc03g007890.3.1;Solyc02g088610.4.1
GO:0009266	response to temperature stimulus	BIOLOGICAL_PROCESS	0.00103925	3.85084e-06	714	17	204	34694	Solyc03g115230.3.1;Solyc06g036290.3.1;Solyc03g123540.3.1;Solyc01g104740.3.1;Solyc05g007730.4.1;Solyc12g015880.2.1;Solyc03g007890.3.1;Solyc06g082560.3.1;Solyc09g065660.4.1;Solyc05g052950.5.1;Solyc09g005120.3.1;Solyc02g072000.3.1;Solyc08g062340.3.1;Solyc07g047610.3.1;Solyc12g042830.3.1;Solyc11g071830.2.1;Solyc02g088610.4.1
GO:0065004	protein-DNA complex assembly	BIOLOGICAL_PROCESS	0.00156095	5.96472e-06	714	13	125	34694	Solyc06g074790.3.1;Solyc07g005020.3.1;Solyc06g075800.1.1;Solyc05g016715.1.1;Solyc01g110130.3.1;Solyc09g082790.5.1;Solyc06g075850.1.1;Solyc05g018120.2.1;Solyc11g072860.2.1;Solyc11g066160.1.1;Solyc05g054610.1.1;Solyc11g066430.3.1;Solyc04g011390.1.1
GO:0071310	cellular response to organic substance	BIOLOGICAL_PROCESS	0.0017332	6.82361e-06	714	32	613	34694	Solyc05g024260.3.1;Solyc04g025600.3.1;Solyc04g076450.1.1;Solyc04g011440.4.1;Solyc09g064530.3.1;Solyc09g008505.3.1;Solyc06g008590.3.1;Solyc09g075950.1.1;Solyc01g087020.2.1;Solyc09g090910.3.1;Solyc12g038450.1.1;Solyc03g043770.4.1;Solyc03g082920.4.1;Solyc04g051510.1.1;Solyc06g076020.3.1;Solyc10g074790.2.1;Solyc11g066060.4.1;Solyc06g061180.2.1;Solyc04g011450.2.1;Solyc02g065540.3.1;Solyc11g066100.2.1;…
GO:0010369	chromocenter	CELLULAR_COMPONENT	0.00287665	1.16585e-05	714	4	4	34694	Solyc02g077480.1.1;Solyc10g008910.1.1;Solyc01g074000.4.1;Solyc01g079110.5.1
GO:0071824	protein-DNA complex subunit organization	BIOLOGICAL_PROCESS	0.00576639	2.40378e-05	714	13	144	34694	Solyc06g074790.3.1;Solyc07g005020.3.1;Solyc06g075800.1.1;Solyc05g016715.1.1;Solyc01g110130.3.1;Solyc09g082790.5.1;Solyc06g075850.1.1;Solyc05g018120.2.1;Solyc11g072860.2.1;Solyc11g066160.1.1;Solyc05g054610.1.1;Solyc11g066430.3.1;Solyc04g011390.1.1
GO:1901505	carbohydrate derivative transmembrane transporter activity	MOLECULAR_FUNCTION	0.00626309	2.68335e-05	714	10	85	34694	Solyc10g085950.2.1;Solyc12g015850.1.1;Solyc02g071080.3.1;Solyc06g034290.3.1;Solyc02g071090.3.1;Solyc03g110970.3.1;Solyc06g068720.3.1;Solyc02g150113.2.1;Solyc04g056713.1.1;Solyc02g071100.3.1
GO:1901264	carbohydrate derivative transport	BIOLOGICAL_PROCESS	0.00820256	3.84381e-05	714	10	89	34694	Solyc10g085950.2.1;Solyc12g015850.1.1;Solyc02g071080.3.1;Solyc06g034290.3.1;Solyc02g071090.3.1;Solyc03g110970.3.1;Solyc06g068720.3.1;Solyc02g150113.2.1;Solyc04g056713.1.1;Solyc02g071100.3.1
GO:0004553	hydrolase activity, hydrolyzing O-glycosyl compounds	MOLECULAR_FUNCTION	0.00820256	3.86268e-05	714	23	409	34694	Solyc12g098810.2.1;Solyc08g083310.3.1;Solyc04g008210.2.1;Solyc07g042160.3.1;Solyc11g008820.2.1;Solyc12g100120.2.1;Solyc07g049300.3.1;Solyc02g069670.4.1;Solyc03g031800.3.1;Solyc01g099090.3.1;Solyc01g102580.3.1;Solyc06g050130.3.1;Solyc11g008810.2.1;Solyc12g055840.2.1;Solyc11g012190.3.1;Solyc03g007950.3.1;Solyc12g008580.2.1;Solyc01g074030.3.1;Solyc09g092520.3.1;Solyc03g116230.4.1;Solyc07g052980.3.1;…
GO:0031226	intrinsic component of plasma membrane	CELLULAR_COMPONENT	0.00820256	3.89422e-05	714	16	222	34694	Solyc05g024260.3.1;Solyc08g083310.3.1;Solyc07g065540.1.1;Solyc03g114910.5.1;Solyc02g088380.4.1;Solyc10g005960.1.1;Solyc08g079090.4.1;Solyc07g045440.1.1;Solyc10g081230.3.1;Solyc12g055840.2.1;Solyc10g085950.2.1;Solyc01g091530.5.1;Solyc08g068440.4.1;Solyc12g008580.2.1;Solyc12g056920.3.1;Solyc02g080660.3.1
GO:0044262	cellular carbohydrate metabolic process	BIOLOGICAL_PROCESS	0.00820256	3.72762e-05	714	23	408	34694	Solyc07g006160.3.1;Solyc04g074290.3.1;Solyc04g008210.2.1;Solyc03g065340.3.1;Solyc01g107800.4.1;Solyc11g008820.2.1;Solyc03g114910.5.1;Solyc04g071650.4.1;Solyc07g049300.3.1;Solyc03g031800.3.1;Solyc06g062430.3.1;Solyc01g020130.3.1;Solyc12g040570.1.1;Solyc01g081586.1.1;Solyc01g102580.3.1;Solyc12g014570.2.1;Solyc01g006370.3.1;Solyc06g072740.1.1;Solyc01g020150.4.1;Solyc09g092130.3.1;Solyc09g092520.3.1;…
GO:0012505	endomembrane system	CELLULAR_COMPONENT	0.00849999	4.13385e-05	714	62	1689	34694	Solyc07g043660.3.1;Solyc08g016808.2.1;Solyc07g043630.2.1;Solyc04g074290.3.1;Solyc04g011440.4.1;Solyc04g071650.4.1;Solyc10g054850.2.1;Solyc02g094390.3.1;Solyc01g020130.3.1;Solyc10g081230.3.1;Solyc04g045650.3.1;Solyc11g020190.1.1;Solyc09g005120.3.1;Solyc01g020150.4.1;Solyc01g065500.3.1;Solyc03g082920.4.1;Solyc01g005690.4.1;Solyc05g018700.4.1;Solyc11g066060.4.1;Solyc02g065540.3.1;Solyc06g053180.4.1;…
GO:0046658	anchored component of plasma membrane	CELLULAR_COMPONENT	0.00989541	4.92708e-05	714	12	133	34694	Solyc07g045440.1.1;Solyc08g083310.3.1;Solyc07g065540.1.1;Solyc12g055840.2.1;Solyc01g091530.5.1;Solyc08g068440.4.1;Solyc03g114910.5.1;Solyc12g008580.2.1;Solyc02g088380.4.1;Solyc10g005960.1.1;Solyc08g079090.4.1;Solyc02g080660.3.1
GO:0016758	hexosyltransferase activity	MOLECULAR_FUNCTION	0.0103074	5.25156e-05	714	21	361	34694	Solyc01g094170.3.1;Solyc12g098600.1.1;Solyc01g079170.3.1;Solyc04g008210.2.1;Solyc03g065340.3.1;Solyc08g081420.4.1;Solyc04g071650.4.1;Solyc01g112210.3.1;Solyc03g031800.3.1;Solyc12g005880.2.1;Solyc02g078590.1.1;Solyc01g020130.3.1;Solyc01g081586.1.1;Solyc01g006370.3.1;Solyc01g020150.4.1;Solyc09g092130.3.1;Solyc12g009820.2.1;Solyc01g105350.3.1;Solyc09g092520.3.1;Solyc07g052980.3.1;Solyc06g036640.4.1
GO:0005794	Golgi apparatus	CELLULAR_COMPONENT	0.0119323	6.21764e-05	714	36	810	34694	Solyc08g005490.3.1;Solyc05g024260.3.1;Solyc02g089690.3.1;Solyc05g006510.3.1;Solyc02g065610.4.1;Solyc04g074290.3.1;Solyc08g006820.5.1;Solyc09g092330.3.1;Solyc01g107800.4.1;Solyc08g076310.3.1;Solyc04g071650.4.1;Solyc02g094390.3.1;Solyc01g095610.4.1;Solyc02g078220.1.1;Solyc01g020130.3.1;Solyc10g081230.3.1;Solyc04g045650.3.1;Solyc01g020150.4.1;Solyc01g005690.4.1;Solyc12g006200.1.1;Solyc03g078640.1.1;…
GO:0071555	cell wall organization	BIOLOGICAL_PROCESS	0.0164969	8.78712e-05	714	17	265	34694	Solyc05g005540.5.1;Solyc04g074290.3.1;Solyc04g008210.2.1;Solyc10g086520.2.1;Solyc03g114910.5.1;Solyc04g071650.4.1;Solyc01g112210.3.1;Solyc03g031800.3.1;Solyc01g020130.3.1;Solyc01g081586.1.1;Solyc01g006370.3.1;Solyc09g031528.1.1;Solyc01g020150.4.1;Solyc01g096360.3.1;Solyc09g092520.3.1;Solyc07g052980.3.1;Solyc03g031840.4.1
GO:0006334	nucleosome assembly	BIOLOGICAL_PROCESS	0.0213376	0.000116127	714	8	64	34694	Solyc06g074790.3.1;Solyc06g075850.1.1;Solyc11g072860.2.1;Solyc06g075800.1.1;Solyc11g066160.1.1;Solyc05g054610.1.1;Solyc11g066430.3.1;Solyc04g011390.1.1
GO:0016740	transferase activity	MOLECULAR_FUNCTION	0.029003	0.000161202	714	140	4882	34694	Solyc04g074290.3.1;Solyc12g039080.3.1;Solyc04g058180.4.1;Solyc07g063820.3.1;Solyc05g014120.1.1;Solyc08g068700.1.1;Solyc09g011840.1.1;Solyc05g008230.3.1;Solyc01g081586.1.1;Solyc06g072740.1.1;Solyc01g111830.3.1;Solyc04g161850.1.1;Solyc01g020150.4.1;Solyc09g092130.3.1;Solyc01g005690.4.1;Solyc11g045610.2.1;Solyc07g054190.4.1;Solyc06g036640.4.1;Solyc01g081250.3.1;Solyc07g041730.4.1;Solyc10g005200.3.1;…
GO:0005524	ATP binding	MOLECULAR_FUNCTION	0.0318119	0.000180999	714	87	2747	34694	Solyc04g025600.3.1;Solyc05g054480.3.1;Solyc02g070000.4.1;Solyc12g039080.3.1;Solyc04g011440.4.1;Solyc07g063820.3.1;Solyc02g085390.4.1;Solyc02g093100.3.1;Solyc03g113030.5.1;Solyc01g110130.3.1;Solyc06g072740.1.1;Solyc10g081910.2.1;Solyc03g118510.3.1;Solyc09g090090.2.1;Solyc04g071000.1.1;Solyc03g082920.4.1;Solyc11g045610.2.1;Solyc02g077630.3.1;Solyc11g066060.4.1;Solyc08g081940.3.1;Solyc08g081100.5.1;…
GO:0005694	chromosome	CELLULAR_COMPONENT	0.0318119	0.000184182	714	21	397	34694	Solyc06g074790.3.1;Solyc10g008910.1.1;Solyc07g005020.3.1;Solyc01g104570.4.1;Solyc03g111680.3.1;Solyc01g079110.5.1;Solyc02g077480.1.1;Solyc11g073260.2.1;Solyc01g074000.4.1;Solyc06g075800.1.1;Solyc01g086820.5.1;Solyc01g110130.3.1;Solyc09g082790.5.1;Solyc06g075850.1.1;Solyc04g161850.1.1;Solyc01g099410.3.1;Solyc11g072860.2.1;Solyc11g066160.1.1;Solyc05g054610.1.1;Solyc11g066430.3.1;Solyc04g011390.1.1
GO:0044264	cellular polysaccharide metabolic process	BIOLOGICAL_PROCESS	0.0327573	0.000193449	714	16	257	34694	Solyc04g074290.3.1;Solyc04g008210.2.1;Solyc03g065340.3.1;Solyc01g107800.4.1;Solyc11g008820.2.1;Solyc03g114910.5.1;Solyc04g071650.4.1;Solyc07g049300.3.1;Solyc03g031800.3.1;Solyc01g020130.3.1;Solyc01g081586.1.1;Solyc01g102580.3.1;Solyc01g006370.3.1;Solyc01g020150.4.1;Solyc09g092520.3.1;Solyc07g052980.3.1
GO:0035250	UDP-galactosyltransferase activity	MOLECULAR_FUNCTION	0.0330191	0.000202642	714	4	11	34694	Solyc12g009820.2.1;Solyc01g094170.3.1;Solyc01g079170.3.1;Solyc02g078590.1.1
GO:0009065	glutamine family amino acid catabolic process	BIOLOGICAL_PROCESS	0.0330191	0.000202642	714	4	11	34694	Solyc02g089620.3.1;Solyc02g089630.3.1;Solyc01g005000.3.1;Solyc05g052100.3.1
GO:0045229	external encapsulating structure organization	BIOLOGICAL_PROCESS	0.0331841	0.000207497	714	17	286	34694	Solyc05g005540.5.1;Solyc04g074290.3.1;Solyc04g008210.2.1;Solyc10g086520.2.1;Solyc03g114910.5.1;Solyc04g071650.4.1;Solyc01g112210.3.1;Solyc03g031800.3.1;Solyc01g020130.3.1;Solyc01g081586.1.1;Solyc01g006370.3.1;Solyc09g031528.1.1;Solyc01g020150.4.1;Solyc01g096360.3.1;Solyc09g092520.3.1;Solyc07g052980.3.1;Solyc03g031840.4.1
GO:0051087	chaperone binding	MOLECULAR_FUNCTION	0.0396635	0.000252604	714	7	54	34694	Solyc07g008800.5.1;Solyc05g056390.2.1;Solyc12g014470.2.1;Solyc06g072430.3.1;Solyc10g084170.1.1;Solyc03g007650.2.1;Solyc02g077670.3.1
GO:0003824	catalytic activity	MOLECULAR_FUNCTION	0.0426737	0.000276717	714	289	11510	34694	Solyc07g043630.2.1;Solyc06g068240.3.1;Solyc04g074290.3.1;Solyc04g083150.2.1;Solyc07g049150.2.1;Solyc01g112140.5.1;Solyc08g068700.1.1;Solyc01g081586.1.1;Solyc06g050130.3.1;Solyc04g161850.1.1;Solyc09g092130.3.1;Solyc01g005690.4.1;Solyc11g045610.2.1;Solyc05g056480.3.1;Solyc02g080660.3.1;Solyc04g049720.4.1;Solyc07g041730.4.1;Solyc02g078570.3.1;Solyc07g008900.4.1;Solyc12g100120.2.1;Solyc12g014410.2.1;…
GO:0031225	anchored component of membrane	CELLULAR_COMPONENT	0.0435957	0.000292792	714	12	163	34694	Solyc07g045440.1.1;Solyc08g083310.3.1;Solyc07g065540.1.1;Solyc12g055840.2.1;Solyc01g091530.5.1;Solyc08g068440.4.1;Solyc03g114910.5.1;Solyc12g008580.2.1;Solyc02g088380.4.1;Solyc10g005960.1.1;Solyc08g079090.4.1;Solyc02g080660.3.1
GO:0055085	transmembrane transport	BIOLOGICAL_PROCESS	0.0435957	0.000292658	714	55	1558	34694	Solyc08g080200.4.1;Solyc06g071330.4.1;Solyc06g068240.3.1;Solyc03g097570.3.1;Solyc07g052380.3.1;Solyc05g007730.4.1;Solyc02g071090.3.1;Solyc06g068720.3.1;Solyc03g113030.5.1;Solyc11g033283.1.1;Solyc10g085950.2.1;Solyc02g071080.3.1;Solyc06g034290.3.1;Solyc06g074820.3.1;Solyc02g071100.3.1;Solyc03g019760.4.1;Solyc05g053860.5.1;Solyc11g072880.2.1;Solyc03g097580.4.1;Solyc05g005950.3.1;Solyc02g080480.3.1;…

## Sheet: Locule_up.slim
GO ID	GO Name	GO Category	FDR	P-Value	Total DEGs	DEGs annotated	Genes annotated	Total genes	Genes
GO:0016021	integral component of membrane	CELLULAR_COMPONENT	6.24211e-15	1.4456e-18	714	264	7552	34694	Solyc07g043630.2.1;Solyc06g068240.3.1;Solyc04g074290.3.1;Solyc03g097570.3.1;Solyc04g083150.2.1;Solyc01g112140.5.1;Solyc06g068720.3.1;Solyc01g081586.1.1;Solyc10g085950.2.1;Solyc03g119990.4.1;Solyc02g071080.3.1;Solyc01g065500.3.1;Solyc01g005690.4.1;Solyc07g054850.3.1;Solyc03g043930.4.1;Solyc05g053860.5.1;Solyc01g080130.2.1;Solyc12g005880.2.1;Solyc06g048950.3.1;Solyc11g072040.2.1;Solyc05g055470.4.1;…
GO:0051082	unfolded protein binding	MOLECULAR_FUNCTION	3.4489e-09	2.39618e-12	714	21	123	34694	Solyc07g008800.5.1;Solyc04g011450.2.1;Solyc04g011440.4.1;Solyc06g036290.3.1;Solyc07g065745.1.1;Solyc03g123540.3.1;Solyc12g015880.2.1;Solyc03g007890.3.1;Solyc11g066100.2.1;Solyc03g007650.2.1;Solyc09g075950.1.1;Solyc02g077670.3.1;Solyc01g106210.3.1;Solyc05g056390.2.1;Solyc03g082920.4.1;Solyc12g014470.2.1;Solyc06g076020.3.1;Solyc08g062340.3.1;Solyc12g042830.3.1;Solyc11g071830.2.1;Solyc11g066060.4.1
GO:0042026	protein refolding	BIOLOGICAL_PROCESS	2.22754e-07	2.57937e-10	714	11	28	34694	Solyc01g106210.3.1;Solyc11g069790.2.1;Solyc04g011450.2.1;Solyc04g011440.4.1;Solyc05g053470.3.1;Solyc03g082920.4.1;Solyc06g076020.3.1;Solyc11g066100.2.1;Solyc02g088610.4.1;Solyc09g075950.1.1;Solyc11g066060.4.1
GO:0051085	chaperone cofactor-dependent protein refolding	BIOLOGICAL_PROCESS	2.22754e-07	2.42239e-10	714	12	37	34694	Solyc01g106210.3.1;Solyc07g008800.5.1;Solyc04g011450.2.1;Solyc04g011440.4.1;Solyc05g056390.2.1;Solyc03g082920.4.1;Solyc06g076020.3.1;Solyc11g066100.2.1;Solyc03g007650.2.1;Solyc09g075950.1.1;Solyc11g066060.4.1;Solyc02g077670.3.1
GO:0000786	nucleosome	CELLULAR_COMPONENT	1.5541e-06	2.51938e-09	714	15	86	34694	Solyc06g074790.3.1;Solyc10g008910.1.1;Solyc01g079110.5.1;Solyc02g077480.1.1;Solyc11g073260.2.1;Solyc01g074000.4.1;Solyc06g075800.1.1;Solyc01g086820.5.1;Solyc06g075850.1.1;Solyc01g099410.3.1;Solyc11g072860.2.1;Solyc11g066160.1.1;Solyc05g054610.1.1;Solyc11g066430.3.1;Solyc04g011390.1.1
GO:0005788	endoplasmic reticulum lumen	CELLULAR_COMPONENT	5.28233e-06	1.03983e-08	714	10	32	34694	Solyc01g106210.3.1;Solyc04g011450.2.1;Solyc04g011440.4.1;Solyc09g005120.3.1;Solyc07g043560.4.1;Solyc03g082920.4.1;Solyc06g076020.3.1;Solyc05g018700.4.1;Solyc11g066100.2.1;Solyc11g066060.4.1
GO:0046982	protein heterodimerization activity	MOLECULAR_FUNCTION	7.7315e-06	1.65843e-08	714	17	134	34694	Solyc06g074790.3.1;Solyc10g008910.1.1;Solyc01g079110.5.1;Solyc02g077480.1.1;Solyc11g073260.2.1;Solyc01g074000.4.1;Solyc06g075800.1.1;Solyc01g086820.5.1;Solyc05g016715.1.1;Solyc06g075850.1.1;Solyc05g018120.2.1;Solyc01g099410.3.1;Solyc11g072860.2.1;Solyc11g066160.1.1;Solyc05g054610.1.1;Solyc11g066430.3.1;Solyc04g011390.1.1
GO:0051787	misfolded protein binding	MOLECULAR_FUNCTION	7.7315e-06	1.701e-08	714	8	16	34694	Solyc01g106210.3.1;Solyc04g011450.2.1;Solyc04g011440.4.1;Solyc03g082920.4.1;Solyc06g076020.3.1;Solyc11g066100.2.1;Solyc09g075950.1.1;Solyc11g066060.4.1
GO:0044183	protein folding chaperone	MOLECULAR_FUNCTION	6.60629e-05	1.60644e-07	714	8	23	34694	Solyc01g106210.3.1;Solyc04g011450.2.1;Solyc04g011440.4.1;Solyc03g082920.4.1;Solyc06g076020.3.1;Solyc11g066100.2.1;Solyc09g075950.1.1;Solyc11g066060.4.1
GO:0031072	heat shock protein binding	MOLECULAR_FUNCTION	0.000143342	3.81759e-07	714	10	50	34694	Solyc01g106210.3.1;Solyc04g011450.2.1;Solyc04g011440.4.1;Solyc03g082920.4.1;Solyc09g064380.3.1;Solyc06g076020.3.1;Solyc11g066100.2.1;Solyc11g071830.2.1;Solyc09g075950.1.1;Solyc11g066060.4.1
GO:0034620	cellular response to unfolded protein	BIOLOGICAL_PROCESS	0.00015396	4.45694e-07	714	8	27	34694	Solyc01g106210.3.1;Solyc04g011450.2.1;Solyc04g011440.4.1;Solyc03g082920.4.1;Solyc06g076020.3.1;Solyc11g066100.2.1;Solyc09g075950.1.1;Solyc11g066060.4.1
GO:0034605	cellular response to heat	BIOLOGICAL_PROCESS	0.000452073	1.62277e-06	714	8	33	34694	Solyc03g115230.3.1;Solyc06g082560.3.1;Solyc09g065660.4.1;Solyc06g036290.3.1;Solyc02g072000.3.1;Solyc12g015880.2.1;Solyc03g007890.3.1;Solyc02g088610.4.1
GO:0010369	chromocenter	CELLULAR_COMPONENT	0.00287665	1.16585e-05	714	4	4	34694	Solyc02g077480.1.1;Solyc10g008910.1.1;Solyc01g074000.4.1;Solyc01g079110.5.1
GO:1901505	carbohydrate derivative transmembrane transporter activity	MOLECULAR_FUNCTION	0.00626309	2.68335e-05	714	10	85	34694	Solyc10g085950.2.1;Solyc12g015850.1.1;Solyc02g071080.3.1;Solyc06g034290.3.1;Solyc02g071090.3.1;Solyc03g110970.3.1;Solyc06g068720.3.1;Solyc02g150113.2.1;Solyc04g056713.1.1;Solyc02g071100.3.1
GO:1901264	carbohydrate derivative transport	BIOLOGICAL_PROCESS	0.00820256	3.84381e-05	714	10	89	34694	Solyc10g085950.2.1;Solyc12g015850.1.1;Solyc02g071080.3.1;Solyc06g034290.3.1;Solyc02g071090.3.1;Solyc03g110970.3.1;Solyc06g068720.3.1;Solyc02g150113.2.1;Solyc04g056713.1.1;Solyc02g071100.3.1
GO:0004553	hydrolase activity, hydrolyzing O-glycosyl compounds	MOLECULAR_FUNCTION	0.00820256	3.86268e-05	714	23	409	34694	Solyc12g098810.2.1;Solyc08g083310.3.1;Solyc04g008210.2.1;Solyc07g042160.3.1;Solyc11g008820.2.1;Solyc12g100120.2.1;Solyc07g049300.3.1;Solyc02g069670.4.1;Solyc03g031800.3.1;Solyc01g099090.3.1;Solyc01g102580.3.1;Solyc06g050130.3.1;Solyc11g008810.2.1;Solyc12g055840.2.1;Solyc11g012190.3.1;Solyc03g007950.3.1;Solyc12g008580.2.1;Solyc01g074030.3.1;Solyc09g092520.3.1;Solyc03g116230.4.1;Solyc07g052980.3.1;…
GO:0046658	anchored component of plasma membrane	CELLULAR_COMPONENT	0.00989541	4.92708e-05	714	12	133	34694	Solyc07g045440.1.1;Solyc08g083310.3.1;Solyc07g065540.1.1;Solyc12g055840.2.1;Solyc01g091530.5.1;Solyc08g068440.4.1;Solyc03g114910.5.1;Solyc12g008580.2.1;Solyc02g088380.4.1;Solyc10g005960.1.1;Solyc08g079090.4.1;Solyc02g080660.3.1
GO:0005794	Golgi apparatus	CELLULAR_COMPONENT	0.0119323	6.21764e-05	714	36	810	34694	Solyc08g005490.3.1;Solyc05g024260.3.1;Solyc02g089690.3.1;Solyc05g006510.3.1;Solyc02g065610.4.1;Solyc04g074290.3.1;Solyc08g006820.5.1;Solyc09g092330.3.1;Solyc01g107800.4.1;Solyc08g076310.3.1;Solyc04g071650.4.1;Solyc02g094390.3.1;Solyc01g095610.4.1;Solyc02g078220.1.1;Solyc01g020130.3.1;Solyc10g081230.3.1;Solyc04g045650.3.1;Solyc01g020150.4.1;Solyc01g005690.4.1;Solyc12g006200.1.1;Solyc03g078640.1.1;…
GO:0071555	cell wall organization	BIOLOGICAL_PROCESS	0.0164969	8.78712e-05	714	17	265	34694	Solyc05g005540.5.1;Solyc04g074290.3.1;Solyc04g008210.2.1;Solyc10g086520.2.1;Solyc03g114910.5.1;Solyc04g071650.4.1;Solyc01g112210.3.1;Solyc03g031800.3.1;Solyc01g020130.3.1;Solyc01g081586.1.1;Solyc01g006370.3.1;Solyc09g031528.1.1;Solyc01g020150.4.1;Solyc01g096360.3.1;Solyc09g092520.3.1;Solyc07g052980.3.1;Solyc03g031840.4.1
GO:0006334	nucleosome assembly	BIOLOGICAL_PROCESS	0.0213376	0.000116127	714	8	64	34694	Solyc06g074790.3.1;Solyc06g075850.1.1;Solyc11g072860.2.1;Solyc06g075800.1.1;Solyc11g066160.1.1;Solyc05g054610.1.1;Solyc11g066430.3.1;Solyc04g011390.1.1
GO:0005524	ATP binding	MOLECULAR_FUNCTION	0.0318119	0.000180999	714	87	2747	34694	Solyc04g025600.3.1;Solyc05g054480.3.1;Solyc02g070000.4.1;Solyc12g039080.3.1;Solyc04g011440.4.1;Solyc07g063820.3.1;Solyc02g085390.4.1;Solyc02g093100.3.1;Solyc03g113030.5.1;Solyc01g110130.3.1;Solyc06g072740.1.1;Solyc10g081910.2.1;Solyc03g118510.3.1;Solyc09g090090.2.1;Solyc04g071000.1.1;Solyc03g082920.4.1;Solyc11g045610.2.1;Solyc02g077630.3.1;Solyc11g066060.4.1;Solyc08g081940.3.1;Solyc08g081100.5.1;…
GO:0044264	cellular polysaccharide metabolic process	BIOLOGICAL_PROCESS	0.0327573	0.000193449	714	16	257	34694	Solyc04g074290.3.1;Solyc04g008210.2.1;Solyc03g065340.3.1;Solyc01g107800.4.1;Solyc11g008820.2.1;Solyc03g114910.5.1;Solyc04g071650.4.1;Solyc07g049300.3.1;Solyc03g031800.3.1;Solyc01g020130.3.1;Solyc01g081586.1.1;Solyc01g102580.3.1;Solyc01g006370.3.1;Solyc01g020150.4.1;Solyc09g092520.3.1;Solyc07g052980.3.1
GO:0009065	glutamine family amino acid catabolic process	BIOLOGICAL_PROCESS	0.0330191	0.000202642	714	4	11	34694	Solyc02g089620.3.1;Solyc02g089630.3.1;Solyc01g005000.3.1;Solyc05g052100.3.1
GO:0035250	UDP-galactosyltransferase activity	MOLECULAR_FUNCTION	0.0330191	0.000202642	714	4	11	34694	Solyc12g009820.2.1;Solyc01g094170.3.1;Solyc01g079170.3.1;Solyc02g078590.1.1
GO:0051087	chaperone binding	MOLECULAR_FUNCTION	0.0396635	0.000252604	714	7	54	34694	Solyc07g008800.5.1;Solyc05g056390.2.1;Solyc12g014470.2.1;Solyc06g072430.3.1;Solyc10g084170.1.1;Solyc03g007650.2.1;Solyc02g077670.3.1
GO:0055085	transmembrane transport	BIOLOGICAL_PROCESS	0.0435957	0.000292658	714	55	1558	34694	Solyc08g080200.4.1;Solyc06g071330.4.1;Solyc06g068240.3.1;Solyc03g097570.3.1;Solyc07g052380.3.1;Solyc05g007730.4.1;Solyc02g071090.3.1;Solyc06g068720.3.1;Solyc03g113030.5.1;Solyc11g033283.1.1;Solyc10g085950.2.1;Solyc02g071080.3.1;Solyc06g034290.3.1;Solyc06g074820.3.1;Solyc02g071100.3.1;Solyc03g019760.4.1;Solyc05g053860.5.1;Solyc11g072880.2.1;Solyc03g097580.4.1;Solyc05g005950.3.1;Solyc02g080480.3.1;…

## Sheet: Locule_down.full
GO ID	GO Name	GO Category	FDR	P-Value	Total DEGs	DEGs annotated	Genes annotated	Total genes	Genes
GO:0050794	regulation of cellular process	BIOLOGICAL_PROCESS	2.10051e-11	7.29681e-15	1114	222	3913	34694	Solyc01g008850.4.1;Solyc06g073860.2.1;Solyc01g009120.3.1;Solyc11g007760.2.1;Solyc08g005190.4.1;Solyc04g009440.3.1;Solyc02g085600.1.1;Solyc09g008040.3.1;Solyc11g072330.2.1;Solyc10g079840.2.1;Solyc02g078550.3.1;Solyc08g060840.1.1;Solyc11g064800.3.1;Solyc12g089240.2.1;Solyc03g083420.4.1;Solyc05g014160.4.1;Solyc07g032480.3.1;Solyc07g043610.3.1;Solyc02g093140.4.1;Solyc02g071730.2.1;Solyc04g049670.4.1;…
GO:0071704	organic substance metabolic process	BIOLOGICAL_PROCESS	2.10051e-11	7.00002e-15	1114	524	11901	34694	Solyc01g008850.4.1;Solyc02g071250.3.1;Solyc03g117870.3.1;Solyc01g009120.3.1;Solyc11g007760.2.1;Solyc08g005190.4.1;Solyc08g069120.4.1;Solyc12g010030.3.1;Solyc09g008040.3.1;Solyc10g079840.2.1;Solyc03g115680.4.1;Solyc12g089240.2.1;Solyc01g095710.3.1;Solyc07g063000.4.1;Solyc07g032480.3.1;Solyc11g009000.2.1;Solyc06g009160.4.1;Solyc07g043610.3.1;Solyc02g081980.3.1;Solyc03g005770.4.1;Solyc04g009990.3.1;…
GO:0008152	metabolic process	BIOLOGICAL_PROCESS	2.10051e-11	3.17662e-15	1114	568	13131	34694	Solyc01g008850.4.1;Solyc02g071250.3.1;Solyc03g117870.3.1;Solyc12g099970.2.1;Solyc01g009120.3.1;Solyc11g007760.2.1;Solyc08g005190.4.1;Solyc08g069120.4.1;Solyc12g010030.3.1;Solyc09g008040.3.1;Solyc10g079840.2.1;Solyc03g115680.4.1;Solyc12g089240.2.1;Solyc01g095710.3.1;Solyc07g063000.4.1;Solyc07g032480.3.1;Solyc11g009000.2.1;Solyc06g009160.4.1;Solyc07g043610.3.1;Solyc02g081980.3.1;Solyc03g005770.4.1;…
GO:0050789	regulation of biological process	BIOLOGICAL_PROCESS	5.78409e-11	2.67906e-14	1114	240	4404	34694	Solyc01g008850.4.1;Solyc06g073860.2.1;Solyc07g006130.3.1;Solyc01g108100.3.1;Solyc01g009120.3.1;Solyc11g007760.2.1;Solyc08g005190.4.1;Solyc04g009440.3.1;Solyc02g085600.1.1;Solyc09g008040.3.1;Solyc11g072330.2.1;Solyc10g079840.2.1;Solyc11g032200.2.1;Solyc02g078550.3.1;Solyc08g060840.1.1;Solyc11g064800.3.1;Solyc12g089240.2.1;Solyc03g083420.4.1;Solyc05g014160.4.1;Solyc07g032480.3.1;Solyc07g043610.3.1;…
GO:0044238	primary metabolic process	BIOLOGICAL_PROCESS	3.26967e-10	1.89305e-13	1114	489	11114	34694	Solyc01g008850.4.1;Solyc02g071250.3.1;Solyc01g009120.3.1;Solyc11g007760.2.1;Solyc08g005190.4.1;Solyc08g069120.4.1;Solyc12g010030.3.1;Solyc09g008040.3.1;Solyc10g079840.2.1;Solyc03g115680.4.1;Solyc12g089240.2.1;Solyc01g095710.3.1;Solyc07g063000.4.1;Solyc07g032480.3.1;Solyc06g009160.4.1;Solyc07g043610.3.1;Solyc02g081980.3.1;Solyc03g005770.4.1;Solyc04g009990.3.1;Solyc09g014900.3.1;Solyc01g105420.4.1;…
GO:0065007	biological regulation	BIOLOGICAL_PROCESS	1.1771e-09	9.43828e-13	1114	258	4999	34694	Solyc01g008850.4.1;Solyc06g073860.2.1;Solyc07g006130.3.1;Solyc01g108100.3.1;Solyc12g099970.2.1;Solyc01g009120.3.1;Solyc11g007760.2.1;Solyc08g005190.4.1;Solyc04g009440.3.1;Solyc07g032170.3.1;Solyc02g085600.1.1;Solyc09g008040.3.1;Solyc11g072330.2.1;Solyc10g079840.2.1;Solyc11g032200.2.1;Solyc02g078550.3.1;Solyc08g060840.1.1;Solyc11g064800.3.1;Solyc12g089240.2.1;Solyc03g083420.4.1;Solyc07g062700.3.1;…
GO:0044237	cellular metabolic process	BIOLOGICAL_PROCESS	1.1771e-09	9.5411e-13	1114	498	11475	34694	Solyc01g008850.4.1;Solyc02g071250.3.1;Solyc03g117870.3.1;Solyc12g099970.2.1;Solyc01g009120.3.1;Solyc11g007760.2.1;Solyc08g005190.4.1;Solyc08g069120.4.1;Solyc09g008040.3.1;Solyc10g079840.2.1;Solyc03g115680.4.1;Solyc12g089240.2.1;Solyc01g095710.3.1;Solyc07g063000.4.1;Solyc07g032480.3.1;Solyc06g009160.4.1;Solyc07g043610.3.1;Solyc02g081980.3.1;Solyc03g005770.4.1;Solyc04g009990.3.1;Solyc09g014900.3.1;…
GO:0035556	intracellular signal transduction	BIOLOGICAL_PROCESS	2.86177e-09	2.65101e-12	1114	49	440	34694	Solyc03g081270.2.1;Solyc01g008850.4.1;Solyc03g081240.3.1;Solyc04g049680.2.1;Solyc05g052030.1.1;Solyc08g077780.3.1;Solyc06g061030.3.1;Solyc11g007760.2.1;Solyc07g062080.4.1;Solyc10g086000.3.1;Solyc12g056590.2.1;Solyc11g072330.2.1;Solyc05g015610.3.1;Solyc08g065320.3.1;Solyc05g055070.4.1;Solyc10g005030.4.1;Solyc03g093610.1.1;Solyc09g075420.3.1;Solyc06g068990.4.1;Solyc11g006370.2.1;Solyc04g049670.4.1;…
GO:0000160	phosphorelay signal transduction system	BIOLOGICAL_PROCESS	2.61647e-08	2.72676e-11	1114	29	177	34694	Solyc03g081270.2.1;Solyc06g069690.4.1;Solyc03g081240.3.1;Solyc04g049680.2.1;Solyc09g075440.4.1;Solyc05g052030.1.1;Solyc05g009790.1.1;Solyc06g061030.3.1;Solyc04g078640.3.1;Solyc10g086000.3.1;Solyc12g056590.2.1;Solyc08g077230.3.1;Solyc11g072330.2.1;Solyc04g012050.3.1;Solyc06g073730.2.1;Solyc06g053710.3.1;Solyc05g015610.3.1;Solyc08g065320.3.1;Solyc05g055070.4.1;Solyc10g005030.4.1;Solyc03g093610.1.1;…
GO:0006807	nitrogen compound metabolic process	BIOLOGICAL_PROCESS	8.33065e-08	9.64642e-11	1114	427	9774	34694	Solyc01g008850.4.1;Solyc02g071250.3.1;Solyc01g009120.3.1;Solyc11g007760.2.1;Solyc08g005190.4.1;Solyc08g069120.4.1;Solyc12g010030.3.1;Solyc09g008040.3.1;Solyc10g079840.2.1;Solyc03g115680.4.1;Solyc12g089240.2.1;Solyc01g095710.3.1;Solyc07g063000.4.1;Solyc07g032480.3.1;Solyc11g009000.2.1;Solyc07g043610.3.1;Solyc02g081980.3.1;Solyc03g005770.4.1;Solyc04g009990.3.1;Solyc09g014900.3.1;Solyc01g105420.4.1;…
GO:0031323	regulation of cellular metabolic process	BIOLOGICAL_PROCESS	2.5586e-07	3.25898e-10	1114	156	2776	34694	Solyc12g006700.3.1;Solyc06g050500.2.1;Solyc02g069830.5.1;Solyc05g006540.3.1;Solyc12g041980.3.1;Solyc01g009120.3.1;Solyc08g005190.4.1;Solyc10g086000.3.1;Solyc04g009440.3.1;Solyc10g077110.1.1;Solyc12g160480.1.1;Solyc11g011160.1.1;Solyc02g085600.1.1;Solyc09g008040.3.1;Solyc10g079840.2.1;Solyc02g078550.3.1;Solyc08g060840.1.1;Solyc11g064800.3.1;Solyc12g089240.2.1;Solyc04g007000.3.1;Solyc04g079940.3.1;…
GO:0006397	mRNA processing	BIOLOGICAL_PROCESS	6.06665e-07	8.42981e-10	1114	37	327	34694	Solyc03g093350.4.1;Solyc10g083150.3.1;Solyc10g086150.2.1;Solyc11g008460.1.1;Solyc04g074040.3.1;Solyc02g083140.3.1;Solyc11g072340.2.1;Solyc01g091705.2.1;Solyc08g005190.4.1;Solyc09g007850.3.1;Solyc08g069120.4.1;Solyc10g006250.3.1;Solyc10g009330.3.1;Solyc01g058260.4.1;Solyc05g005620.4.1;Solyc05g009540.3.1;Solyc02g083320.3.1;Solyc01g103090.4.1;Solyc06g066470.4.1;Solyc09g065010.4.1;Solyc05g054910.3.1;…
GO:0043227	membrane-bounded organelle	CELLULAR_COMPONENT	1.37841e-06	2.23457e-09	1114	423	9891	34694	Solyc10g051377.1.1;Solyc06g008030.3.1;Solyc12g099970.2.1;Solyc01g009120.3.1;Solyc08g005190.4.1;Solyc08g069120.4.1;Solyc12g010030.3.1;Solyc09g008040.3.1;Solyc11g072330.2.1;Solyc10g079840.2.1;Solyc12g089240.2.1;Solyc10g051120.3.1;Solyc01g095710.3.1;Solyc07g062700.3.1;Solyc07g063000.4.1;Solyc05g014160.4.1;Solyc11g008440.3.1;Solyc09g090460.3.1;Solyc07g032480.3.1;Solyc06g009160.4.1;Solyc07g043610.3.1;…
GO:0043231	intracellular membrane-bounded organelle	CELLULAR_COMPONENT	1.37841e-06	2.15075e-09	1114	422	9858	34694	Solyc10g051377.1.1;Solyc06g008030.3.1;Solyc12g099970.2.1;Solyc01g009120.3.1;Solyc08g005190.4.1;Solyc08g069120.4.1;Solyc12g010030.3.1;Solyc09g008040.3.1;Solyc11g072330.2.1;Solyc10g079840.2.1;Solyc12g089240.2.1;Solyc10g051120.3.1;Solyc01g095710.3.1;Solyc07g062700.3.1;Solyc07g063000.4.1;Solyc05g014160.4.1;Solyc11g008440.3.1;Solyc09g090460.3.1;Solyc07g032480.3.1;Solyc06g009160.4.1;Solyc07g043610.3.1;…
GO:0023052	signaling	BIOLOGICAL_PROCESS	1.60867e-06	2.79413e-09	1114	83	1214	34694	Solyc03g081270.2.1;Solyc01g008850.4.1;Solyc04g074230.3.1;Solyc03g081240.3.1;Solyc06g050500.2.1;Solyc04g049680.2.1;Solyc11g072480.2.1;Solyc05g052030.1.1;Solyc08g077780.3.1;Solyc06g061030.3.1;Solyc11g007760.2.1;Solyc07g062080.4.1;Solyc10g086000.3.1;Solyc12g056590.2.1;Solyc10g052880.1.1;Solyc11g072330.2.1;Solyc02g078550.3.1;Solyc08g060840.1.1;Solyc11g064800.3.1;Solyc07g044980.3.1;Solyc05g015610.3.1;…
GO:0009987	cellular process	BIOLOGICAL_PROCESS	1.84438e-06	3.4171e-09	1114	610	15359	34694	Solyc01g008850.4.1;Solyc02g071250.3.1;Solyc03g117870.3.1;Solyc12g099970.2.1;Solyc01g009120.3.1;Solyc11g007760.2.1;Solyc02g090130.4.1;Solyc08g005190.4.1;Solyc08g069120.4.1;Solyc12g010030.3.1;Solyc09g008040.3.1;Solyc11g072330.2.1;Solyc10g079840.2.1;Solyc03g115680.4.1;Solyc12g089240.2.1;Solyc10g051120.3.1;Solyc01g095710.3.1;Solyc09g018070.1.1;Solyc07g062700.3.1;Solyc07g063000.4.1;Solyc05g014160.4.1;…
GO:0110165	cellular anatomical entity	CELLULAR_COMPONENT	1.94385e-06	3.82649e-09	1114	711	18457	34694	Solyc01g008850.4.1;Solyc10g083400.1.1;Solyc05g047530.3.1;Solyc10g051377.1.1;Solyc03g117870.3.1;Solyc07g053550.3.1;Solyc06g008030.3.1;Solyc12g099970.2.1;Solyc08g014010.4.1;Solyc01g009120.3.1;Solyc02g090130.4.1;Solyc05g015420.5.1;Solyc08g005190.4.1;Solyc08g069120.4.1;Solyc01g096100.2.1;Solyc12g010030.3.1;Solyc09g008040.3.1;Solyc02g036480.1.1;Solyc12g006230.3.1;Solyc11g072330.2.1;Solyc10g079840.2.1;…
GO:0016071	mRNA metabolic process	BIOLOGICAL_PROCESS	2.47847e-06	5.16588e-09	1114	42	436	34694	Solyc03g093350.4.1;Solyc10g080740.2.1;Solyc08g066700.3.1;Solyc10g083150.3.1;Solyc10g086150.2.1;Solyc11g008460.1.1;Solyc04g074040.3.1;Solyc02g083140.3.1;Solyc11g072340.2.1;Solyc01g091705.2.1;Solyc08g005190.4.1;Solyc09g007850.3.1;Solyc08g069120.4.1;Solyc10g006250.3.1;Solyc10g009330.3.1;Solyc01g058260.4.1;Solyc05g005620.4.1;Solyc05g009540.3.1;Solyc10g079840.2.1;Solyc01g090780.3.1;Solyc02g083320.3.1;…
GO:0007165	signal transduction	BIOLOGICAL_PROCESS	2.77774e-06	6.11128e-09	1114	82	1205	34694	Solyc03g081270.2.1;Solyc01g008850.4.1;Solyc04g074230.3.1;Solyc03g081240.3.1;Solyc06g050500.2.1;Solyc04g049680.2.1;Solyc11g072480.2.1;Solyc05g052030.1.1;Solyc08g077780.3.1;Solyc06g061030.3.1;Solyc11g007760.2.1;Solyc07g062080.4.1;Solyc10g086000.3.1;Solyc12g056590.2.1;Solyc10g052880.1.1;Solyc11g072330.2.1;Solyc02g078550.3.1;Solyc08g060840.1.1;Solyc11g064800.3.1;Solyc07g044980.3.1;Solyc05g015610.3.1;…
GO:0016830	carbon-carbon lyase activity	MOLECULAR_FUNCTION	2.78484e-06	6.77183e-09	1114	20	110	34694	Solyc08g066240.3.1;Solyc10g076510.2.1;Solyc04g009960.3.1;Solyc01g010050.3.1;Solyc02g084440.4.1;Solyc11g011920.2.1;Solyc08g066220.4.1;Solyc02g036290.4.1;Solyc09g009260.3.1;Solyc10g054440.3.1;Solyc04g076880.3.1;Solyc04g082030.1.1;Solyc08g066250.4.1;Solyc01g105560.3.1;Solyc02g036300.3.1;Solyc06g006100.3.1;Solyc09g005110.3.1;Solyc08g066260.3.1;Solyc04g025530.3.1;Solyc01g080170.3.1
GO:0007154	cell communication	BIOLOGICAL_PROCESS	2.78484e-06	6.52589e-09	1114	92	1428	34694	Solyc03g081270.2.1;Solyc01g008850.4.1;Solyc04g074230.3.1;Solyc03g081240.3.1;Solyc06g050500.2.1;Solyc04g049680.2.1;Solyc11g072480.2.1;Solyc05g052030.1.1;Solyc12g099970.2.1;Solyc08g077780.3.1;Solyc06g061030.3.1;Solyc11g007760.2.1;Solyc07g062080.4.1;Solyc10g086000.3.1;Solyc12g056590.2.1;Solyc10g052880.1.1;Solyc11g072330.2.1;Solyc02g078550.3.1;Solyc08g060840.1.1;Solyc07g055690.1.1;Solyc11g064800.3.1;…
GO:0097159	organic cyclic compound binding	MOLECULAR_FUNCTION	7.92303e-06	2.01837e-08	1114	377	8774	34694	Solyc01g008850.4.1;Solyc05g008200.4.1;Solyc10g083400.1.1;Solyc05g047530.3.1;Solyc07g006130.3.1;Solyc10g051377.1.1;Solyc03g117870.3.1;Solyc09g089580.4.1;Solyc11g007760.2.1;Solyc08g005190.4.1;Solyc04g009440.3.1;Solyc01g102410.3.1;Solyc08g069120.4.1;Solyc01g105560.3.1;Solyc10g075030.3.1;Solyc02g085600.1.1;Solyc10g009330.3.1;Solyc09g008040.3.1;Solyc05g009540.3.1;Solyc11g072330.2.1;Solyc10g079840.2.1;…
GO:0019222	regulation of metabolic process	BIOLOGICAL_PROCESS	8.16194e-06	2.17375e-08	1114	163	3123	34694	Solyc12g006700.3.1;Solyc06g050500.2.1;Solyc02g069830.5.1;Solyc05g006540.3.1;Solyc12g041980.3.1;Solyc01g009120.3.1;Solyc08g005190.4.1;Solyc10g086000.3.1;Solyc04g009440.3.1;Solyc10g077110.1.1;Solyc12g160480.1.1;Solyc11g011160.1.1;Solyc02g085600.1.1;Solyc09g008040.3.1;Solyc10g079840.2.1;Solyc02g078550.3.1;Solyc08g060840.1.1;Solyc11g064800.3.1;Solyc12g089240.2.1;Solyc04g007000.3.1;Solyc04g079940.3.1;…
GO:0050896	response to stimulus	BIOLOGICAL_PROCESS	9.70012e-06	2.81941e-08	1114	193	3889	34694	Solyc01g008850.4.1;Solyc01g095140.5.1;Solyc01g108100.3.1;Solyc12g099970.2.1;Solyc11g007760.2.1;Solyc09g008040.3.1;Solyc04g017690.3.1;Solyc11g072330.2.1;Solyc11g032200.2.1;Solyc07g043130.3.1;Solyc02g078550.3.1;Solyc08g060840.1.1;Solyc11g064800.3.1;Solyc12g089240.2.1;Solyc09g018070.1.1;Solyc06g063370.3.1;Solyc07g062700.3.1;Solyc05g014160.4.1;Solyc05g007020.4.1;Solyc07g043610.3.1;Solyc04g049670.4.1;…
GO:0005634	nucleus	CELLULAR_COMPONENT	9.70012e-06	2.69807e-08	1114	232	4884	34694	Solyc10g051377.1.1;Solyc06g008030.3.1;Solyc01g009120.3.1;Solyc08g005190.4.1;Solyc08g069120.4.1;Solyc10g075030.3.1;Solyc02g085600.1.1;Solyc10g009330.3.1;Solyc11g072330.2.1;Solyc07g043130.3.1;Solyc02g078550.3.1;Solyc08g060840.1.1;Solyc11g064800.3.1;Solyc12g089240.2.1;Solyc03g083420.4.1;Solyc12g098700.1.1;Solyc01g095710.3.1;Solyc05g014160.4.1;Solyc07g032480.3.1;Solyc05g007020.4.1;Solyc03g097240.3.1;…
GO:1901363	heterocyclic compound binding	MOLECULAR_FUNCTION	9.70012e-06	2.92716e-08	1114	376	8763	34694	Solyc01g008850.4.1;Solyc05g008200.4.1;Solyc10g083400.1.1;Solyc05g047530.3.1;Solyc07g006130.3.1;Solyc10g051377.1.1;Solyc03g117870.3.1;Solyc09g089580.4.1;Solyc11g007760.2.1;Solyc08g005190.4.1;Solyc04g009440.3.1;Solyc01g102410.3.1;Solyc08g069120.4.1;Solyc01g105560.3.1;Solyc10g075030.3.1;Solyc02g085600.1.1;Solyc10g009330.3.1;Solyc09g008040.3.1;Solyc05g009540.3.1;Solyc11g072330.2.1;Solyc10g079840.2.1;…
GO:0005622	intracellular anatomical structure	CELLULAR_COMPONENT	9.70012e-06	3.03269e-08	1114	498	12243	34694	Solyc10g051377.1.1;Solyc03g117870.3.1;Solyc07g053550.3.1;Solyc06g008030.3.1;Solyc12g099970.2.1;Solyc01g009120.3.1;Solyc08g005190.4.1;Solyc08g069120.4.1;Solyc12g010030.3.1;Solyc09g008040.3.1;Solyc11g072330.2.1;Solyc10g079840.2.1;Solyc12g089240.2.1;Solyc10g051120.3.1;Solyc01g095710.3.1;Solyc07g062700.3.1;Solyc07g063000.4.1;Solyc05g014160.4.1;Solyc11g008440.3.1;Solyc09g090460.3.1;Solyc07g032480.3.1;…
GO:0016070	RNA metabolic process	BIOLOGICAL_PROCESS	1.3046e-05	4.31398e-08	1114	179	3558	34694	Solyc12g006700.3.1;Solyc10g083150.3.1;Solyc02g069830.5.1;Solyc05g006540.3.1;Solyc12g041980.3.1;Solyc11g072340.2.1;Solyc08g005190.4.1;Solyc10g086000.3.1;Solyc04g009440.3.1;Solyc01g102410.3.1;Solyc08g069120.4.1;Solyc10g077110.1.1;Solyc12g160480.1.1;Solyc02g085600.1.1;Solyc10g009330.3.1;Solyc09g008040.3.1;Solyc05g009540.3.1;Solyc10g079840.2.1;Solyc02g078550.3.1;Solyc08g060840.1.1;Solyc11g064800.3.1;…
GO:0009416	response to light stimulus	BIOLOGICAL_PROCESS	1.3046e-05	4.38091e-08	1114	30	269	34694	Solyc04g071990.3.1;Solyc02g090390.4.1;Solyc10g007690.3.1;Solyc03g005780.3.1;Solyc03g111260.3.1;Solyc07g063600.3.1;Solyc04g072036.2.1;Solyc11g005190.3.1;Solyc10g086000.3.1;Solyc10g086560.3.1;Solyc03g005760.1.1;Solyc02g070940.1.1;Solyc09g008040.3.1;Solyc01g067530.3.1;Solyc04g017690.3.1;Solyc07g062160.3.1;Solyc07g043130.3.1;Solyc08g065870.4.1;Solyc08g060840.1.1;Solyc12g089240.2.1;Solyc10g006230.4.1;…
GO:0000398	mRNA splicing, via spliceosome	BIOLOGICAL_PROCESS	1.36652e-05	4.74706e-08	1114	25	194	34694	Solyc03g093350.4.1;Solyc11g008460.1.1;Solyc04g074040.3.1;Solyc11g072340.2.1;Solyc01g091705.2.1;Solyc08g005190.4.1;Solyc08g069120.4.1;Solyc10g006250.3.1;Solyc10g009330.3.1;Solyc05g009540.3.1;Solyc02g083320.3.1;Solyc01g103090.4.1;Solyc05g054910.3.1;Solyc10g006260.3.1;Solyc12g098700.1.1;Solyc01g099380.4.1;Solyc11g008470.2.1;Solyc02g085420.4.1;Solyc09g005980.4.1;Solyc07g056340.4.1;Solyc01g096180.4.1;…
GO:0048511	rhythmic process	BIOLOGICAL_PROCESS	1.39126e-05	4.99411e-08	1114	14	57	34694	Solyc03g081270.2.1;Solyc06g069690.4.1;Solyc04g071990.3.1;Solyc03g081240.3.1;Solyc04g049680.2.1;Solyc03g117870.3.1;Solyc01g108100.3.1;Solyc10g005030.4.1;Solyc10g086000.3.1;Solyc04g009050.4.1;Solyc01g097330.3.1;Solyc04g049670.4.1;Solyc08g060840.1.1;Solyc12g056650.2.1
GO:0080090	regulation of primary metabolic process	BIOLOGICAL_PROCESS	1.41162e-05	5.23066e-08	1114	145	2731	34694	Solyc12g006700.3.1;Solyc06g050500.2.1;Solyc02g069830.5.1;Solyc05g006540.3.1;Solyc12g041980.3.1;Solyc08g005190.4.1;Solyc10g086000.3.1;Solyc04g009440.3.1;Solyc10g077110.1.1;Solyc12g160480.1.1;Solyc11g011160.1.1;Solyc02g085600.1.1;Solyc09g008040.3.1;Solyc10g079840.2.1;Solyc02g078550.3.1;Solyc08g060840.1.1;Solyc11g064800.3.1;Solyc12g089240.2.1;Solyc04g007000.3.1;Solyc04g079940.3.1;Solyc07g066330.3.1;…
GO:0005488	binding	MOLECULAR_FUNCTION	1.44749e-05	5.86638e-08	1114	504	12476	34694	Solyc01g008850.4.1;Solyc03g118810.1.1;Solyc10g083400.1.1;Solyc05g047530.3.1;Solyc10g051377.1.1;Solyc03g117870.3.1;Solyc06g008030.3.1;Solyc12g099970.2.1;Solyc01g009120.3.1;Solyc11g007760.2.1;Solyc08g005190.4.1;Solyc08g069120.4.1;Solyc12g010030.3.1;Solyc09g008040.3.1;Solyc12g006230.3.1;Solyc11g072330.2.1;Solyc10g079840.2.1;Solyc12g089240.2.1;Solyc01g095710.3.1;Solyc07g062700.3.1;Solyc07g063000.4.1;…
GO:0000377	RNA splicing, via transesterification reactions with bulged adenosine as nucleophile	BIOLOGICAL_PROCESS	1.44749e-05	5.7978e-08	1114	26	211	34694	Solyc03g093350.4.1;Solyc11g008460.1.1;Solyc04g074040.3.1;Solyc11g072340.2.1;Solyc01g091705.2.1;Solyc08g005190.4.1;Solyc08g069120.4.1;Solyc10g006250.3.1;Solyc10g009330.3.1;Solyc05g009540.3.1;Solyc02g083320.3.1;Solyc01g103090.4.1;Solyc05g054910.3.1;Solyc10g006260.3.1;Solyc12g098700.1.1;Solyc01g099380.4.1;Solyc11g008470.2.1;Solyc02g086200.4.1;Solyc02g085420.4.1;Solyc09g005980.4.1;Solyc07g056340.4.1;…
GO:0000375	RNA splicing, via transesterification reactions	BIOLOGICAL_PROCESS	1.44749e-05	5.7978e-08	1114	26	211	34694	Solyc03g093350.4.1;Solyc11g008460.1.1;Solyc04g074040.3.1;Solyc11g072340.2.1;Solyc01g091705.2.1;Solyc08g005190.4.1;Solyc08g069120.4.1;Solyc10g006250.3.1;Solyc10g009330.3.1;Solyc05g009540.3.1;Solyc02g083320.3.1;Solyc01g103090.4.1;Solyc05g054910.3.1;Solyc10g006260.3.1;Solyc12g098700.1.1;Solyc01g099380.4.1;Solyc11g008470.2.1;Solyc02g086200.4.1;Solyc02g085420.4.1;Solyc09g005980.4.1;Solyc07g056340.4.1;…
GO:0008380	RNA splicing	BIOLOGICAL_PROCESS	1.62408e-05	6.77015e-08	1114	29	259	34694	Solyc03g093350.4.1;Solyc11g008460.1.1;Solyc04g074040.3.1;Solyc11g072340.2.1;Solyc01g091705.2.1;Solyc08g005190.4.1;Solyc08g069120.4.1;Solyc10g006250.3.1;Solyc10g009330.3.1;Solyc05g009540.3.1;Solyc02g083320.3.1;Solyc01g103090.4.1;Solyc03g096220.3.1;Solyc05g054910.3.1;Solyc10g006260.3.1;Solyc12g098700.1.1;Solyc01g099380.4.1;Solyc11g008470.2.1;Solyc02g086200.4.1;Solyc02g078490.3.1;Solyc12g008750.3.1;…
GO:0043170	macromolecule metabolic process	BIOLOGICAL_PROCESS	1.6873e-05	7.22905e-08	1114	390	9234	34694	Solyc01g008850.4.1;Solyc02g071250.3.1;Solyc01g009120.3.1;Solyc11g007760.2.1;Solyc08g005190.4.1;Solyc08g069120.4.1;Solyc12g010030.3.1;Solyc09g008040.3.1;Solyc10g079840.2.1;Solyc03g115680.4.1;Solyc12g089240.2.1;Solyc01g095710.3.1;Solyc07g063000.4.1;Solyc07g032480.3.1;Solyc07g043610.3.1;Solyc03g005770.4.1;Solyc04g009990.3.1;Solyc01g090480.5.1;Solyc06g076780.3.1;Solyc12g088390.1.1;Solyc07g008250.3.1;…
GO:0019219	regulation of nucleobase-containing compound metabolic process	BIOLOGICAL_PROCESS	2.60305e-05	1.14539e-07	1114	125	2287	34694	Solyc12g006700.3.1;Solyc02g069830.5.1;Solyc05g006540.3.1;Solyc12g041980.3.1;Solyc10g086000.3.1;Solyc04g009440.3.1;Solyc10g077110.1.1;Solyc12g160480.1.1;Solyc11g011160.1.1;Solyc02g085600.1.1;Solyc09g008040.3.1;Solyc10g079840.2.1;Solyc02g078550.3.1;Solyc08g060840.1.1;Solyc11g064800.3.1;Solyc12g089240.2.1;Solyc04g007000.3.1;Solyc04g079940.3.1;Solyc07g066330.3.1;Solyc06g071040.4.1;Solyc02g077590.1.1;…
GO:1901360	organic cyclic compound metabolic process	BIOLOGICAL_PROCESS	2.77306e-05	1.25231e-07	1114	245	5320	34694	Solyc03g117870.3.1;Solyc01g009120.3.1;Solyc08g005190.4.1;Solyc04g009440.3.1;Solyc01g102410.3.1;Solyc08g069120.4.1;Solyc01g105560.3.1;Solyc02g085600.1.1;Solyc10g009330.3.1;Solyc09g008040.3.1;Solyc05g009540.3.1;Solyc10g079840.2.1;Solyc02g078550.3.1;Solyc08g060840.1.1;Solyc11g064800.3.1;Solyc12g089240.2.1;Solyc12g098700.1.1;Solyc01g095710.3.1;Solyc01g105383.1.1;Solyc01g088400.4.1;Solyc07g032480.3.1;…
GO:0009314	response to radiation	BIOLOGICAL_PROCESS	2.79611e-05	1.29509e-07	1114	30	284	34694	Solyc04g071990.3.1;Solyc02g090390.4.1;Solyc10g007690.3.1;Solyc03g005780.3.1;Solyc03g111260.3.1;Solyc07g063600.3.1;Solyc04g072036.2.1;Solyc11g005190.3.1;Solyc10g086000.3.1;Solyc10g086560.3.1;Solyc03g005760.1.1;Solyc02g070940.1.1;Solyc09g008040.3.1;Solyc01g067530.3.1;Solyc04g017690.3.1;Solyc07g062160.3.1;Solyc07g043130.3.1;Solyc08g065870.4.1;Solyc08g060840.1.1;Solyc12g089240.2.1;Solyc10g006230.4.1;…
GO:0051171	regulation of nitrogen compound metabolic process	BIOLOGICAL_PROCESS	5.58321e-05	2.65067e-07	1114	140	2687	34694	Solyc12g006700.3.1;Solyc06g050500.2.1;Solyc02g069830.5.1;Solyc05g006540.3.1;Solyc12g041980.3.1;Solyc08g005190.4.1;Solyc10g086000.3.1;Solyc04g009440.3.1;Solyc10g077110.1.1;Solyc12g160480.1.1;Solyc11g011160.1.1;Solyc02g085600.1.1;Solyc09g008040.3.1;Solyc10g079840.2.1;Solyc02g078550.3.1;Solyc08g060840.1.1;Solyc11g064800.3.1;Solyc12g089240.2.1;Solyc04g007000.3.1;Solyc04g079940.3.1;Solyc07g066330.3.1;…
GO:0009768	photosynthesis, light harvesting in photosystem I	BIOLOGICAL_PROCESS	5.62485e-05	2.73557e-07	1114	9	21	34694	Solyc10g006230.4.1;Solyc03g005760.1.1;Solyc05g056050.3.1;Solyc10g007690.3.1;Solyc03g005780.3.1;Solyc02g070940.1.1;Solyc06g063370.3.1;Solyc03g005770.4.1;Solyc07g063600.3.1
GO:0006725	cellular aromatic compound metabolic process	BIOLOGICAL_PROCESS	7.76174e-05	3.95457e-07	1114	239	5233	34694	Solyc03g117870.3.1;Solyc01g009120.3.1;Solyc08g005190.4.1;Solyc04g009440.3.1;Solyc01g102410.3.1;Solyc08g069120.4.1;Solyc02g085600.1.1;Solyc10g009330.3.1;Solyc09g008040.3.1;Solyc05g009540.3.1;Solyc10g079840.2.1;Solyc02g078550.3.1;Solyc08g060840.1.1;Solyc11g064800.3.1;Solyc12g089240.2.1;Solyc12g098700.1.1;Solyc01g095710.3.1;Solyc01g105383.1.1;Solyc07g032480.3.1;Solyc07g043610.3.1;Solyc02g077490.4.1;…
GO:0051252	regulation of RNA metabolic process	BIOLOGICAL_PROCESS	7.76174e-05	3.89921e-07	1114	120	2219	34694	Solyc12g006700.3.1;Solyc02g069830.5.1;Solyc05g006540.3.1;Solyc12g041980.3.1;Solyc10g086000.3.1;Solyc04g009440.3.1;Solyc10g077110.1.1;Solyc12g160480.1.1;Solyc02g085600.1.1;Solyc09g008040.3.1;Solyc10g079840.2.1;Solyc02g078550.3.1;Solyc08g060840.1.1;Solyc11g064800.3.1;Solyc12g089240.2.1;Solyc04g007000.3.1;Solyc04g079940.3.1;Solyc07g066330.3.1;Solyc02g077590.1.1;Solyc07g032480.3.1;Solyc07g043610.3.1;…
GO:0051716	cellular response to stimulus	BIOLOGICAL_PROCESS	7.94638e-05	4.14065e-07	1114	118	2173	34694	Solyc01g008850.4.1;Solyc12g006700.3.1;Solyc06g050500.2.1;Solyc11g072480.2.1;Solyc12g099970.2.1;Solyc12g041980.3.1;Solyc07g042460.2.1;Solyc11g007760.2.1;Solyc10g086000.3.1;Solyc07g032740.4.1;Solyc12g160480.1.1;Solyc09g008040.3.1;Solyc11g072330.2.1;Solyc02g078550.3.1;Solyc08g060840.1.1;Solyc11g064800.3.1;Solyc12g094620.3.1;Solyc07g062700.3.1;Solyc05g014160.4.1;Solyc08g065320.3.1;Solyc10g055800.2.1;…
GO:0009522	photosystem I	CELLULAR_COMPONENT	9.66287e-05	5.19328e-07	1114	14	71	34694	Solyc06g054260.1.1;Solyc10g006230.4.1;Solyc06g074200.4.1;Solyc10g007690.3.1;Solyc03g005780.3.1;Solyc06g063370.3.1;Solyc07g063600.3.1;Solyc07g066150.1.1;Solyc06g082950.5.1;Solyc06g066640.3.1;Solyc03g005760.1.1;Solyc05g056050.3.1;Solyc02g070940.1.1;Solyc03g005770.4.1
GO:0043226	organelle	CELLULAR_COMPONENT	9.66287e-05	5.25886e-07	1114	431	10562	34694	Solyc10g051377.1.1;Solyc06g008030.3.1;Solyc12g099970.2.1;Solyc01g009120.3.1;Solyc08g005190.4.1;Solyc08g069120.4.1;Solyc12g010030.3.1;Solyc09g008040.3.1;Solyc11g072330.2.1;Solyc10g079840.2.1;Solyc12g089240.2.1;Solyc10g051120.3.1;Solyc01g095710.3.1;Solyc07g062700.3.1;Solyc07g063000.4.1;Solyc05g014160.4.1;Solyc11g008440.3.1;Solyc09g090460.3.1;Solyc07g032480.3.1;Solyc06g009160.4.1;Solyc07g043610.3.1;…
GO:0043229	intracellular organelle	CELLULAR_COMPONENT	0.000110726	6.15431e-07	1114	430	10545	34694	Solyc10g051377.1.1;Solyc06g008030.3.1;Solyc12g099970.2.1;Solyc01g009120.3.1;Solyc08g005190.4.1;Solyc08g069120.4.1;Solyc12g010030.3.1;Solyc09g008040.3.1;Solyc11g072330.2.1;Solyc10g079840.2.1;Solyc12g089240.2.1;Solyc10g051120.3.1;Solyc01g095710.3.1;Solyc07g062700.3.1;Solyc07g063000.4.1;Solyc05g014160.4.1;Solyc11g008440.3.1;Solyc09g090460.3.1;Solyc07g032480.3.1;Solyc06g009160.4.1;Solyc07g043610.3.1;…
GO:0019752	carboxylic acid metabolic process	BIOLOGICAL_PROCESS	0.000114146	6.58638e-07	1114	61	906	34694	Solyc03g117870.3.1;Solyc01g090697.1.1;Solyc08g066620.3.1;Solyc04g009960.3.1;Solyc12g041980.3.1;Solyc10g011925.2.1;Solyc11g008680.2.1;Solyc12g008510.2.1;Solyc02g036290.4.1;Solyc01g102410.3.1;Solyc04g082030.1.1;Solyc07g032740.4.1;Solyc01g080170.3.1;Solyc11g069800.1.1;Solyc01g005560.3.1;Solyc01g105383.1.1;Solyc01g104210.3.1;Solyc09g009020.3.1;Solyc06g009160.4.1;Solyc07g065340.1.1;Solyc09g009260.3.1;…
GO:0043167	ion binding	MOLECULAR_FUNCTION	0.000114146	6.60874e-07	1114	304	7025	34694	Solyc01g008850.4.1;Solyc03g118810.1.1;Solyc05g008200.4.1;Solyc10g083400.1.1;Solyc05g047530.3.1;Solyc03g117870.3.1;Solyc09g089580.4.1;Solyc11g007760.2.1;Solyc01g102410.3.1;Solyc08g069120.4.1;Solyc01g105560.3.1;Solyc10g075030.3.1;Solyc12g010030.3.1;Solyc12g006230.3.1;Solyc05g009540.3.1;Solyc08g060840.1.1;Solyc12g089240.2.1;Solyc03g083420.4.1;Solyc12g098700.1.1;Solyc01g095710.3.1;Solyc06g063370.3.1;…
GO:0071369	cellular response to ethylene stimulus	BIOLOGICAL_PROCESS	0.000151358	9.28897e-07	1114	18	126	34694	Solyc06g073730.2.1;Solyc09g075440.4.1;Solyc05g052030.1.1;Solyc05g009790.1.1;Solyc06g053710.3.1;Solyc08g065320.3.1;Solyc05g055070.4.1;Solyc03g093610.1.1;Solyc09g089930.3.1;Solyc04g078640.3.1;Solyc09g089610.3.1;Solyc09g075420.3.1;Solyc12g056590.2.1;Solyc04g071770.3.1;Solyc05g052050.1.1;Solyc09g090070.1.1;Solyc04g012050.3.1;Solyc04g051360.3.1
GO:0009873	ethylene-activated signaling pathway	BIOLOGICAL_PROCESS	0.000151358	9.28897e-07	1114	18	126	34694	Solyc06g073730.2.1;Solyc09g075440.4.1;Solyc05g052030.1.1;Solyc05g009790.1.1;Solyc06g053710.3.1;Solyc08g065320.3.1;Solyc05g055070.4.1;Solyc03g093610.1.1;Solyc09g089930.3.1;Solyc04g078640.3.1;Solyc09g089610.3.1;Solyc09g075420.3.1;Solyc12g056590.2.1;Solyc04g071770.3.1;Solyc05g052050.1.1;Solyc09g090070.1.1;Solyc04g012050.3.1;Solyc04g051360.3.1
GO:0009889	regulation of biosynthetic process	BIOLOGICAL_PROCESS	0.000151358	8.96042e-07	1114	125	2378	34694	Solyc12g006700.3.1;Solyc02g069830.5.1;Solyc05g006540.3.1;Solyc12g041980.3.1;Solyc08g005190.4.1;Solyc10g086000.3.1;Solyc04g009440.3.1;Solyc10g077110.1.1;Solyc12g160480.1.1;Solyc02g085600.1.1;Solyc09g008040.3.1;Solyc02g078550.3.1;Solyc08g060840.1.1;Solyc11g064800.3.1;Solyc12g089240.2.1;Solyc04g007000.3.1;Solyc04g079940.3.1;Solyc07g066330.3.1;Solyc02g077590.1.1;Solyc07g032480.3.1;Solyc07g043610.3.1;…
GO:0043436	oxoacid metabolic process	BIOLOGICAL_PROCESS	0.000220098	1.3931e-06	1114	61	927	34694	Solyc03g117870.3.1;Solyc01g090697.1.1;Solyc08g066620.3.1;Solyc04g009960.3.1;Solyc12g041980.3.1;Solyc10g011925.2.1;Solyc11g008680.2.1;Solyc12g008510.2.1;Solyc02g036290.4.1;Solyc01g102410.3.1;Solyc04g082030.1.1;Solyc07g032740.4.1;Solyc01g080170.3.1;Solyc11g069800.1.1;Solyc01g005560.3.1;Solyc01g105383.1.1;Solyc01g104210.3.1;Solyc09g009020.3.1;Solyc06g009160.4.1;Solyc07g065340.1.1;Solyc09g009260.3.1;…
GO:0009628	response to abiotic stimulus	BIOLOGICAL_PROCESS	0.000220098	1.42722e-06	1114	47	636	34694	Solyc12g006700.3.1;Solyc04g071990.3.1;Solyc02g090390.4.1;Solyc01g095140.5.1;Solyc10g007690.3.1;Solyc03g005780.3.1;Solyc03g111260.3.1;Solyc03g118340.3.1;Solyc01g108100.3.1;Solyc07g063600.3.1;Solyc04g072036.2.1;Solyc11g005190.3.1;Solyc04g078640.3.1;Solyc10g086000.3.1;Solyc10g086560.3.1;Solyc03g005760.1.1;Solyc02g070940.1.1;Solyc12g160480.1.1;Solyc09g008040.3.1;Solyc01g067530.3.1;Solyc04g017690.3.1;…
GO:0070887	cellular response to chemical stimulus	BIOLOGICAL_PROCESS	0.000220098	1.40228e-06	1114	58	859	34694	Solyc12g006700.3.1;Solyc06g050500.2.1;Solyc11g072480.2.1;Solyc05g052030.1.1;Solyc07g042460.2.1;Solyc12g056590.2.1;Solyc07g032740.4.1;Solyc12g160480.1.1;Solyc10g052880.1.1;Solyc02g078550.3.1;Solyc11g064800.3.1;Solyc12g094620.3.1;Solyc07g044980.3.1;Solyc07g062700.3.1;Solyc04g082910.1.1;Solyc05g014160.4.1;Solyc08g065320.3.1;Solyc05g055070.4.1;Solyc03g093610.1.1;Solyc06g053840.3.1;Solyc09g075420.3.1;…
GO:0005777	peroxisome	CELLULAR_COMPONENT	0.000223718	1.50251e-06	1114	17	117	34694	Solyc12g094620.3.1;Solyc03g031880.3.1;Solyc03g032010.4.1;Solyc02g067580.3.1;Solyc02g079170.3.1;Solyc12g094520.2.1;Solyc09g061840.5.1;Solyc07g047800.3.1;Solyc05g052640.3.1;Solyc02g036290.4.1;Solyc06g009160.4.1;Solyc02g036300.3.1;Solyc03g032020.5.1;Solyc01g100640.4.1;Solyc03g111170.3.1;Solyc01g108010.3.1;Solyc04g082450.3.1
GO:0042579	microbody	CELLULAR_COMPONENT	0.000223718	1.50251e-06	1114	17	117	34694	Solyc12g094620.3.1;Solyc03g031880.3.1;Solyc03g032010.4.1;Solyc02g067580.3.1;Solyc02g079170.3.1;Solyc12g094520.2.1;Solyc09g061840.5.1;Solyc07g047800.3.1;Solyc05g052640.3.1;Solyc02g036290.4.1;Solyc06g009160.4.1;Solyc02g036300.3.1;Solyc03g032020.5.1;Solyc01g100640.4.1;Solyc03g111170.3.1;Solyc01g108010.3.1;Solyc04g082450.3.1
GO:0016831	carboxy-lyase activity	MOLECULAR_FUNCTION	0.000233873	1.59779e-06	1114	14	79	34694	Solyc08g066240.3.1;Solyc10g076510.2.1;Solyc01g010050.3.1;Solyc11g011920.2.1;Solyc08g066220.4.1;Solyc02g036290.4.1;Solyc10g054440.3.1;Solyc04g076880.3.1;Solyc04g082030.1.1;Solyc08g066250.4.1;Solyc02g036300.3.1;Solyc09g005110.3.1;Solyc08g066260.3.1;Solyc04g025530.3.1
GO:0009765	photosynthesis, light harvesting	BIOLOGICAL_PROCESS	0.000279685	1.94316e-06	1114	9	28	34694	Solyc10g006230.4.1;Solyc03g005760.1.1;Solyc05g056050.3.1;Solyc10g007690.3.1;Solyc03g005780.3.1;Solyc02g070940.1.1;Solyc06g063370.3.1;Solyc03g005770.4.1;Solyc07g063600.3.1
GO:0031326	regulation of cellular biosynthetic process	BIOLOGICAL_PROCESS	0.000371556	2.62447e-06	1114	122	2355	34694	Solyc12g006700.3.1;Solyc02g069830.5.1;Solyc05g006540.3.1;Solyc12g041980.3.1;Solyc08g005190.4.1;Solyc10g086000.3.1;Solyc04g009440.3.1;Solyc10g077110.1.1;Solyc12g160480.1.1;Solyc02g085600.1.1;Solyc09g008040.3.1;Solyc02g078550.3.1;Solyc08g060840.1.1;Solyc11g064800.3.1;Solyc12g089240.2.1;Solyc04g007000.3.1;Solyc04g079940.3.1;Solyc07g066330.3.1;Solyc02g077590.1.1;Solyc07g032480.3.1;Solyc07g043610.3.1;…
GO:0003824	catalytic activity	MOLECULAR_FUNCTION	0.000496819	3.56679e-06	1114	452	11347	34694	Solyc01g008850.4.1;Solyc10g083400.1.1;Solyc05g047530.3.1;Solyc02g071250.3.1;Solyc03g117870.3.1;Solyc07g053550.3.1;Solyc12g099970.2.1;Solyc01g009120.3.1;Solyc11g007760.2.1;Solyc12g010030.3.1;Solyc12g006230.3.1;Solyc03g115680.4.1;Solyc01g095710.3.1;Solyc07g063000.4.1;Solyc11g009000.2.1;Solyc06g009160.4.1;Solyc02g081980.3.1;Solyc03g062830.3.1;Solyc04g009990.3.1;Solyc09g014900.3.1;Solyc12g056675.2.1;…
GO:0006082	organic acid metabolic process	BIOLOGICAL_PROCESS	0.000516717	3.76947e-06	1114	62	974	34694	Solyc03g117870.3.1;Solyc01g090697.1.1;Solyc08g066620.3.1;Solyc04g009960.3.1;Solyc12g041980.3.1;Solyc10g011925.2.1;Solyc11g008680.2.1;Solyc12g008510.2.1;Solyc02g036290.4.1;Solyc01g102410.3.1;Solyc04g082030.1.1;Solyc07g032740.4.1;Solyc01g080170.3.1;Solyc11g069800.1.1;Solyc01g005560.3.1;Solyc07g056670.3.1;Solyc01g105383.1.1;Solyc01g104210.3.1;Solyc09g009020.3.1;Solyc06g009160.4.1;Solyc07g065340.1.1;…
GO:0006796	phosphate-containing compound metabolic process	BIOLOGICAL_PROCESS	0.000534258	3.9593e-06	1114	136	2726	34694	Solyc05g014510.3.1;Solyc01g008850.4.1;Solyc05g008200.4.1;Solyc06g050500.2.1;Solyc01g068590.4.1;Solyc02g071250.3.1;Solyc05g008370.3.1;Solyc08g074560.3.1;Solyc12g099970.2.1;Solyc11g007760.2.1;Solyc07g032170.3.1;Solyc05g009540.3.1;Solyc11g011880.2.1;Solyc02g071820.5.1;Solyc02g078550.3.1;Solyc03g115680.4.1;Solyc03g083420.4.1;Solyc02g080070.3.1;Solyc03g032010.4.1;Solyc07g063000.4.1;Solyc07g032480.3.1;…
GO:0010556	regulation of macromolecule biosynthetic process	BIOLOGICAL_PROCESS	0.000548489	4.12828e-06	1114	120	2327	34694	Solyc12g006700.3.1;Solyc02g069830.5.1;Solyc05g006540.3.1;Solyc12g041980.3.1;Solyc08g005190.4.1;Solyc10g086000.3.1;Solyc04g009440.3.1;Solyc10g077110.1.1;Solyc12g160480.1.1;Solyc02g085600.1.1;Solyc09g008040.3.1;Solyc02g078550.3.1;Solyc08g060840.1.1;Solyc11g064800.3.1;Solyc12g089240.2.1;Solyc04g007000.3.1;Solyc04g079940.3.1;Solyc07g066330.3.1;Solyc02g077590.1.1;Solyc07g032480.3.1;Solyc07g043610.3.1;…
GO:0140110	transcription regulator activity	MOLECULAR_FUNCTION	0.000592463	4.52785e-06	1114	80	1384	34694	Solyc12g006700.3.1;Solyc02g069830.5.1;Solyc06g053220.3.1;Solyc05g052030.1.1;Solyc05g006540.3.1;Solyc03g026020.3.1;Solyc02g021680.3.1;Solyc03g119370.2.1;Solyc01g087340.3.1;Solyc01g087370.2.1;Solyc06g061030.3.1;Solyc12g056590.2.1;Solyc10g077110.1.1;Solyc12g160480.1.1;Solyc02g032950.3.1;Solyc02g085600.1.1;Solyc08g082750.3.1;Solyc09g008040.3.1;Solyc08g013900.3.1;Solyc08g060840.1.1;Solyc06g005680.4.1;…
GO:0005198	structural molecule activity	MOLECULAR_FUNCTION	0.000609798	4.73094e-06	1114	3	613	34694	Solyc11g005650.1.1;Solyc09g098510.4.1;Solyc09g010110.3.1
GO:0016310	phosphorylation	BIOLOGICAL_PROCESS	0.000614566	4.8391e-06	1114	100	1861	34694	Solyc05g014510.3.1;Solyc01g008850.4.1;Solyc05g008200.4.1;Solyc08g074560.3.1;Solyc12g099970.2.1;Solyc11g007760.2.1;Solyc05g009540.3.1;Solyc11g011880.2.1;Solyc02g071820.5.1;Solyc03g083420.4.1;Solyc02g080070.3.1;Solyc07g063000.4.1;Solyc07g032480.3.1;Solyc12g088200.3.1;Solyc09g009020.3.1;Solyc04g076880.3.1;Solyc06g068990.4.1;Solyc03g006630.3.1;Solyc03g097130.3.1;Solyc12g044270.2.1;Solyc05g051050.3.1;…
GO:0060255	regulation of macromolecule metabolic process	BIOLOGICAL_PROCESS	0.000635594	5.10546e-06	1114	147	3020	34694	Solyc12g006700.3.1;Solyc06g050500.2.1;Solyc02g069830.5.1;Solyc05g006540.3.1;Solyc12g041980.3.1;Solyc08g005190.4.1;Solyc10g086000.3.1;Solyc04g009440.3.1;Solyc10g077110.1.1;Solyc12g160480.1.1;Solyc11g011160.1.1;Solyc02g085600.1.1;Solyc09g008040.3.1;Solyc10g079840.2.1;Solyc02g078550.3.1;Solyc08g060840.1.1;Solyc11g064800.3.1;Solyc12g089240.2.1;Solyc04g007000.3.1;Solyc04g079940.3.1;Solyc07g066330.3.1;…
GO:0004398	histidine decarboxylase activity	MOLECULAR_FUNCTION	0.000635594	5.15187e-06	1114	4	1	34694	Solyc08g066240.3.1;Solyc08g066250.4.1;Solyc08g066260.3.1;Solyc08g066220.4.1
GO:1903506	regulation of nucleic acid-templated transcription	BIOLOGICAL_PROCESS	0.000692661	5.85506e-06	1114	112	2147	34694	Solyc12g006700.3.1;Solyc02g069830.5.1;Solyc05g006540.3.1;Solyc12g041980.3.1;Solyc10g086000.3.1;Solyc04g009440.3.1;Solyc10g077110.1.1;Solyc12g160480.1.1;Solyc02g085600.1.1;Solyc09g008040.3.1;Solyc02g078550.3.1;Solyc08g060840.1.1;Solyc11g064800.3.1;Solyc12g089240.2.1;Solyc04g007000.3.1;Solyc04g079940.3.1;Solyc07g066330.3.1;Solyc02g077590.1.1;Solyc07g032480.3.1;Solyc07g043610.3.1;Solyc02g071730.2.1;…
GO:2001141	regulation of RNA biosynthetic process	BIOLOGICAL_PROCESS	0.000692661	5.85506e-06	1114	112	2147	34694	Solyc12g006700.3.1;Solyc02g069830.5.1;Solyc05g006540.3.1;Solyc12g041980.3.1;Solyc10g086000.3.1;Solyc04g009440.3.1;Solyc10g077110.1.1;Solyc12g160480.1.1;Solyc02g085600.1.1;Solyc09g008040.3.1;Solyc02g078550.3.1;Solyc08g060840.1.1;Solyc11g064800.3.1;Solyc12g089240.2.1;Solyc04g007000.3.1;Solyc04g079940.3.1;Solyc07g066330.3.1;Solyc02g077590.1.1;Solyc07g032480.3.1;Solyc07g043610.3.1;Solyc02g071730.2.1;…
GO:0006355	regulation of transcription, DNA-templated	BIOLOGICAL_PROCESS	0.000692661	5.85506e-06	1114	112	2147	34694	Solyc12g006700.3.1;Solyc02g069830.5.1;Solyc05g006540.3.1;Solyc12g041980.3.1;Solyc10g086000.3.1;Solyc04g009440.3.1;Solyc10g077110.1.1;Solyc12g160480.1.1;Solyc02g085600.1.1;Solyc09g008040.3.1;Solyc02g078550.3.1;Solyc08g060840.1.1;Solyc11g064800.3.1;Solyc12g089240.2.1;Solyc04g007000.3.1;Solyc04g079940.3.1;Solyc07g066330.3.1;Solyc02g077590.1.1;Solyc07g032480.3.1;Solyc07g043610.3.1;Solyc02g071730.2.1;…
GO:0006793	phosphorus metabolic process	BIOLOGICAL_PROCESS	0.000696388	6.04783e-06	1114	137	2772	34694	Solyc05g014510.3.1;Solyc01g008850.4.1;Solyc05g008200.4.1;Solyc06g050500.2.1;Solyc01g068590.4.1;Solyc02g071250.3.1;Solyc05g008370.3.1;Solyc08g074560.3.1;Solyc12g099970.2.1;Solyc11g007760.2.1;Solyc07g032170.3.1;Solyc05g009540.3.1;Solyc11g011880.2.1;Solyc02g071820.5.1;Solyc02g078550.3.1;Solyc03g115680.4.1;Solyc03g083420.4.1;Solyc02g080070.3.1;Solyc03g032010.4.1;Solyc07g063000.4.1;Solyc07g032480.3.1;…
GO:0009723	response to ethylene	BIOLOGICAL_PROCESS	0.000696388	6.02452e-06	1114	19	161	34694	Solyc06g073730.2.1;Solyc09g075440.4.1;Solyc05g052030.1.1;Solyc05g009790.1.1;Solyc06g053710.3.1;Solyc08g065320.3.1;Solyc05g055070.4.1;Solyc03g093610.1.1;Solyc09g089930.3.1;Solyc04g078640.3.1;Solyc09g089610.3.1;Solyc09g075420.3.1;Solyc12g056590.2.1;Solyc04g071770.3.1;Solyc05g052050.1.1;Solyc09g090070.1.1;Solyc04g012050.3.1;Solyc04g051360.3.1;Solyc08g081690.3.1
GO:0010467	gene expression	BIOLOGICAL_PROCESS	0.000704687	6.20151e-06	1114	195	4261	34694	Solyc07g006130.3.1;Solyc08g005190.4.1;Solyc04g009440.3.1;Solyc01g102410.3.1;Solyc08g069120.4.1;Solyc02g085600.1.1;Solyc10g009330.3.1;Solyc09g008040.3.1;Solyc05g009540.3.1;Solyc10g079840.2.1;Solyc02g078550.3.1;Solyc08g060840.1.1;Solyc11g064800.3.1;Solyc12g089240.2.1;Solyc12g098700.1.1;Solyc01g095710.3.1;Solyc07g032480.3.1;Solyc07g043610.3.1;Solyc02g071730.2.1;Solyc07g022760.5.1;Solyc03g120390.3.1;…
GO:1901564	organonitrogen compound metabolic process	BIOLOGICAL_PROCESS	0.000732821	6.53396e-06	1114	257	5920	34694	Solyc01g008850.4.1;Solyc06g073860.2.1;Solyc07g006130.3.1;Solyc02g071250.3.1;Solyc01g009120.3.1;Solyc04g078540.5.1;Solyc11g007760.2.1;Solyc08g005190.4.1;Solyc06g068220.4.1;Solyc01g102410.3.1;Solyc01g105560.3.1;Solyc12g010030.3.1;Solyc05g009540.3.1;Solyc10g079840.2.1;Solyc11g032200.2.1;Solyc07g043130.3.1;Solyc02g078550.3.1;Solyc03g115680.4.1;Solyc03g083420.4.1;Solyc06g063370.3.1;Solyc07g063000.4.1;…
GO:0016607	nuclear speck	CELLULAR_COMPONENT	0.00082034	7.40928e-06	1114	9	34	34694	Solyc02g078490.3.1;Solyc12g008750.3.1;Solyc08g069120.4.1;Solyc09g005980.4.1;Solyc07g056340.4.1;Solyc01g096180.4.1;Solyc04g074040.3.1;Solyc01g099810.3.1;Solyc11g072340.2.1
GO:0044281	small molecule metabolic process	BIOLOGICAL_PROCESS	0.00090366	8.26646e-06	1114	89	1622	34694	Solyc09g075390.4.1;Solyc03g117870.3.1;Solyc01g090697.1.1;Solyc02g069580.3.1;Solyc03g063600.4.1;Solyc08g066620.3.1;Solyc04g009960.3.1;Solyc12g041980.3.1;Solyc10g011925.2.1;Solyc11g008680.2.1;Solyc12g008510.2.1;Solyc02g036290.4.1;Solyc01g102410.3.1;Solyc04g082030.1.1;Solyc01g105560.3.1;Solyc07g032740.4.1;Solyc05g007960.4.1;Solyc01g080170.3.1;Solyc11g069800.1.1;Solyc01g005560.3.1;Solyc03g032010.4.1;…
GO:0003735	structural constituent of ribosome	MOLECULAR_FUNCTION	0.000972338	9.0073e-06	1114	2	526	34694	Solyc11g005650.1.1;Solyc09g010110.3.1
GO:0046483	heterocycle metabolic process	BIOLOGICAL_PROCESS	0.00100733	9.44809e-06	1114	223	5030	34694	Solyc01g009120.3.1;Solyc08g005190.4.1;Solyc04g009440.3.1;Solyc01g102410.3.1;Solyc08g069120.4.1;Solyc01g105560.3.1;Solyc02g085600.1.1;Solyc10g009330.3.1;Solyc09g008040.3.1;Solyc05g009540.3.1;Solyc10g079840.2.1;Solyc02g078550.3.1;Solyc08g060840.1.1;Solyc11g064800.3.1;Solyc12g089240.2.1;Solyc12g098700.1.1;Solyc01g095710.3.1;Solyc07g032480.3.1;Solyc07g043610.3.1;Solyc02g077490.4.1;Solyc02g071730.2.1;…
GO:0016829	lyase activity	MOLECULAR_FUNCTION	0.00125814	1.19462e-05	1114	35	453	34694	Solyc10g076510.2.1;Solyc05g018650.4.1;Solyc08g066620.3.1;Solyc02g093580.5.1;Solyc04g009960.3.1;Solyc01g010050.3.1;Solyc02g084440.4.1;Solyc10g011925.2.1;Solyc08g066220.4.1;Solyc02g036290.4.1;Solyc01g095080.3.1;Solyc04g082030.1.1;Solyc01g105560.3.1;Solyc02g036300.3.1;Solyc06g068600.3.1;Solyc08g066260.3.1;Solyc01g080170.3.1;Solyc11g069800.1.1;Solyc08g066240.3.1;Solyc02g067180.3.1;Solyc12g005860.2.1;…
GO:0033036	macromolecule localization	BIOLOGICAL_PROCESS	0.0013478	1.29536e-05	1114	12	1058	34694	Solyc02g090130.4.1;Solyc01g011090.4.1;Solyc10g086560.3.1;Solyc01g006950.3.1;Solyc10g085970.3.1;Solyc11g005030.3.1;Solyc10g074630.3.1;Solyc07g008920.5.1;Solyc06g007800.5.1;Solyc03g043960.3.1;Solyc08g081690.3.1;Solyc09g018370.4.1
GO:0010468	regulation of gene expression	BIOLOGICAL_PROCESS	0.00137802	1.34036e-05	1114	129	2622	34694	Solyc12g006700.3.1;Solyc02g069830.5.1;Solyc05g006540.3.1;Solyc12g041980.3.1;Solyc08g005190.4.1;Solyc10g086000.3.1;Solyc04g009440.3.1;Solyc10g077110.1.1;Solyc12g160480.1.1;Solyc02g085600.1.1;Solyc09g008040.3.1;Solyc10g079840.2.1;Solyc02g078550.3.1;Solyc08g060840.1.1;Solyc11g064800.3.1;Solyc12g089240.2.1;Solyc04g007000.3.1;Solyc04g079940.3.1;Solyc07g066330.3.1;Solyc02g077590.1.1;Solyc07g032480.3.1;…
GO:0006396	RNA processing	BIOLOGICAL_PROCESS	0.00164739	1.63397e-05	1114	53	830	34694	Solyc08g066700.3.1;Solyc10g083150.3.1;Solyc12g009500.2.1;Solyc02g083140.3.1;Solyc11g072340.2.1;Solyc01g091705.2.1;Solyc08g005190.4.1;Solyc08g069120.4.1;Solyc01g111030.2.1;Solyc10g006250.3.1;Solyc10g009330.3.1;Solyc01g058260.4.1;Solyc05g009540.3.1;Solyc07g005030.4.1;Solyc03g096220.3.1;Solyc09g065010.4.1;Solyc12g098700.1.1;Solyc01g095710.3.1;Solyc11g005170.2.1;Solyc01g099380.4.1;Solyc12g055930.3.1;…
GO:0071495	cellular response to endogenous stimulus	BIOLOGICAL_PROCESS	0.00164739	1.64052e-05	1114	38	521	34694	Solyc02g090390.4.1;Solyc06g050500.2.1;Solyc11g072480.2.1;Solyc09g075440.4.1;Solyc05g052030.1.1;Solyc05g009790.1.1;Solyc04g078640.3.1;Solyc12g056590.2.1;Solyc01g096050.4.1;Solyc01g097330.3.1;Solyc10g052880.1.1;Solyc08g021820.3.1;Solyc04g012050.3.1;Solyc02g078550.3.1;Solyc10g076260.2.1;Solyc11g064800.3.1;Solyc07g044980.3.1;Solyc06g073730.2.1;Solyc06g053710.3.1;Solyc05g014160.4.1;Solyc08g065320.3.1;…
GO:0008104	protein localization	BIOLOGICAL_PROCESS	0.00185704	1.8708e-05	1114	8	846	34694	Solyc02g090130.4.1;Solyc10g086560.3.1;Solyc01g006950.3.1;Solyc11g005030.3.1;Solyc10g074630.3.1;Solyc06g007800.5.1;Solyc03g043960.3.1;Solyc09g018370.4.1
GO:0009521	photosystem	CELLULAR_COMPONENT	0.0020013	2.0393e-05	1114	18	161	34694	Solyc02g065400.3.1;Solyc06g054260.1.1;Solyc10g006230.4.1;Solyc06g074200.4.1;Solyc10g007690.3.1;Solyc03g005780.3.1;Solyc05g007780.3.1;Solyc06g063370.3.1;Solyc07g063600.3.1;Solyc07g066150.1.1;Solyc06g082950.5.1;Solyc07g066310.3.1;Solyc06g066640.3.1;Solyc09g065910.3.1;Solyc03g005760.1.1;Solyc05g056050.3.1;Solyc02g070940.1.1;Solyc03g005770.4.1
GO:0042221	response to chemical	BIOLOGICAL_PROCESS	0.00222977	2.29793e-05	1114	83	1522	34694	Solyc12g006700.3.1;Solyc04g074230.3.1;Solyc06g050500.2.1;Solyc01g095140.5.1;Solyc11g072480.2.1;Solyc05g052030.1.1;Solyc03g026020.3.1;Solyc07g042460.2.1;Solyc04g074840.3.1;Solyc12g056590.2.1;Solyc07g032740.4.1;Solyc12g160480.1.1;Solyc10g052880.1.1;Solyc11g032200.2.1;Solyc02g078550.3.1;Solyc11g064800.3.1;Solyc12g094620.3.1;Solyc07g044980.3.1;Solyc03g114580.4.1;Solyc09g018070.1.1;Solyc07g062700.3.1;…
GO:0016772	transferase activity, transferring phosphorus-containing groups	MOLECULAR_FUNCTION	0.00282655	2.94569e-05	1114	105	2059	34694	Solyc05g014510.3.1;Solyc01g008850.4.1;Solyc05g008200.4.1;Solyc08g074560.3.1;Solyc12g099970.2.1;Solyc11g007760.2.1;Solyc05g009540.3.1;Solyc11g011880.2.1;Solyc02g071820.5.1;Solyc03g083420.4.1;Solyc02g080070.3.1;Solyc07g063000.4.1;Solyc12g088200.3.1;Solyc04g076880.3.1;Solyc06g068990.4.1;Solyc03g006630.3.1;Solyc03g097130.3.1;Solyc12g044270.2.1;Solyc05g051050.3.1;Solyc06g082440.1.1;Solyc04g077030.3.1;…
GO:0045184	establishment of protein localization	BIOLOGICAL_PROCESS	0.00293929	3.09721e-05	1114	7	768	34694	Solyc02g090130.4.1;Solyc01g006950.3.1;Solyc11g005030.3.1;Solyc10g074630.3.1;Solyc06g007800.5.1;Solyc03g043960.3.1;Solyc09g018370.4.1
GO:0006139	nucleobase-containing compound metabolic process	BIOLOGICAL_PROCESS	0.00298131	3.17602e-05	1114	211	4814	34694	Solyc08g005190.4.1;Solyc04g009440.3.1;Solyc01g102410.3.1;Solyc08g069120.4.1;Solyc02g085600.1.1;Solyc10g009330.3.1;Solyc09g008040.3.1;Solyc05g009540.3.1;Solyc10g079840.2.1;Solyc02g078550.3.1;Solyc08g060840.1.1;Solyc11g064800.3.1;Solyc12g089240.2.1;Solyc12g098700.1.1;Solyc01g095710.3.1;Solyc07g032480.3.1;Solyc07g043610.3.1;Solyc02g077490.4.1;Solyc02g071730.2.1;Solyc02g081980.3.1;Solyc07g022760.5.1;…
GO:1901362	organic cyclic compound biosynthetic process	BIOLOGICAL_PROCESS	0.00298783	3.21756e-05	1114	145	3077	34694	Solyc12g006700.3.1;Solyc02g069830.5.1;Solyc05g006540.3.1;Solyc03g117870.3.1;Solyc12g041980.3.1;Solyc10g086000.3.1;Solyc04g009440.3.1;Solyc10g077110.1.1;Solyc01g105560.3.1;Solyc12g160480.1.1;Solyc02g085600.1.1;Solyc09g008040.3.1;Solyc02g078550.3.1;Solyc08g060840.1.1;Solyc11g064800.3.1;Solyc12g089240.2.1;Solyc04g007000.3.1;Solyc04g079940.3.1;Solyc07g066330.3.1;Solyc03g032010.4.1;Solyc01g105383.1.1;…
GO:0032039	integrator complex	CELLULAR_COMPONENT	0.0030335	3.30187e-05	1114	3	0	34694	Solyc03g097460.3.1;Solyc02g064620.2.1;Solyc02g064590.2.1
GO:0003700	DNA-binding transcription factor activity	MOLECULAR_FUNCTION	0.00306128	3.36755e-05	1114	69	1214	34694	Solyc12g006700.3.1;Solyc02g069830.5.1;Solyc06g053220.3.1;Solyc05g052030.1.1;Solyc03g026020.3.1;Solyc02g021680.3.1;Solyc03g119370.2.1;Solyc06g061030.3.1;Solyc12g056590.2.1;Solyc10g077110.1.1;Solyc12g160480.1.1;Solyc02g032950.3.1;Solyc02g085600.1.1;Solyc08g082750.3.1;Solyc09g008040.3.1;Solyc08g013900.3.1;Solyc08g060840.1.1;Solyc06g005680.4.1;Solyc04g007000.3.1;Solyc01g091630.3.1;Solyc02g077590.1.1;…
GO:0090304	nucleic acid metabolic process	BIOLOGICAL_PROCESS	0.00339379	3.77262e-05	1114	193	4341	34694	Solyc08g005190.4.1;Solyc04g009440.3.1;Solyc01g102410.3.1;Solyc08g069120.4.1;Solyc02g085600.1.1;Solyc10g009330.3.1;Solyc09g008040.3.1;Solyc05g009540.3.1;Solyc10g079840.2.1;Solyc02g078550.3.1;Solyc08g060840.1.1;Solyc11g064800.3.1;Solyc12g089240.2.1;Solyc12g098700.1.1;Solyc01g095710.3.1;Solyc07g032480.3.1;Solyc07g043610.3.1;Solyc02g077490.4.1;Solyc02g071730.2.1;Solyc07g022760.5.1;Solyc03g120390.3.1;…
GO:0032870	cellular response to hormone stimulus	BIOLOGICAL_PROCESS	0.0037348	4.19494e-05	1114	37	516	34694	Solyc02g090390.4.1;Solyc06g050500.2.1;Solyc11g072480.2.1;Solyc09g075440.4.1;Solyc05g052030.1.1;Solyc05g009790.1.1;Solyc04g078640.3.1;Solyc12g056590.2.1;Solyc01g096050.4.1;Solyc01g097330.3.1;Solyc10g052880.1.1;Solyc08g021820.3.1;Solyc04g012050.3.1;Solyc02g078550.3.1;Solyc11g064800.3.1;Solyc07g044980.3.1;Solyc06g073730.2.1;Solyc06g053710.3.1;Solyc05g014160.4.1;Solyc08g065320.3.1;Solyc05g055070.4.1;…
GO:0015031	protein transport	BIOLOGICAL_PROCESS	0.0037856	4.29584e-05	1114	7	760	34694	Solyc02g090130.4.1;Solyc01g006950.3.1;Solyc11g005030.3.1;Solyc10g074630.3.1;Solyc06g007800.5.1;Solyc03g043960.3.1;Solyc09g018370.4.1
GO:0044391	ribosomal subunit	CELLULAR_COMPONENT	0.00410218	4.70259e-05	1114	1	401	34694	Solyc06g073090.3.1
GO:0006351	transcription, DNA-templated	BIOLOGICAL_PROCESS	0.00432389	5.00682e-05	1114	115	2340	34694	Solyc12g006700.3.1;Solyc02g069830.5.1;Solyc05g006540.3.1;Solyc12g041980.3.1;Solyc10g086000.3.1;Solyc04g009440.3.1;Solyc10g077110.1.1;Solyc12g160480.1.1;Solyc02g085600.1.1;Solyc09g008040.3.1;Solyc02g078550.3.1;Solyc08g060840.1.1;Solyc11g064800.3.1;Solyc12g089240.2.1;Solyc04g007000.3.1;Solyc04g079940.3.1;Solyc07g066330.3.1;Solyc02g077590.1.1;Solyc07g032480.3.1;Solyc07g043610.3.1;Solyc02g071730.2.1;…
GO:0016301	kinase activity	MOLECULAR_FUNCTION	0.00489538	5.72526e-05	1114	91	1756	34694	Solyc05g014510.3.1;Solyc01g008850.4.1;Solyc05g008200.4.1;Solyc09g075390.4.1;Solyc08g074560.3.1;Solyc03g063600.4.1;Solyc12g099970.2.1;Solyc08g077780.3.1;Solyc11g007760.2.1;Solyc12g008510.2.1;Solyc07g062080.4.1;Solyc05g056200.1.1;Solyc10g052880.1.1;Solyc05g009540.3.1;Solyc11g011880.2.1;Solyc05g008930.3.1;Solyc02g071820.5.1;Solyc07g055690.1.1;Solyc11g008960.3.1;Solyc03g083420.4.1;Solyc02g080070.3.1;…
GO:0071214	cellular response to abiotic stimulus	BIOLOGICAL_PROCESS	0.00503312	6.00292e-05	1114	10	58	34694	Solyc12g006700.3.1;Solyc10g086000.3.1;Solyc02g090390.4.1;Solyc05g050280.3.1;Solyc12g160480.1.1;Solyc07g062700.3.1;Solyc09g008040.3.1;Solyc08g061130.3.1;Solyc08g060840.1.1;Solyc08g081690.3.1
GO:0104004	cellular response to environmental stimulus	BIOLOGICAL_PROCESS	0.00503312	6.00292e-05	1114	10	58	34694	Solyc12g006700.3.1;Solyc10g086000.3.1;Solyc02g090390.4.1;Solyc05g050280.3.1;Solyc12g160480.1.1;Solyc07g062700.3.1;Solyc09g008040.3.1;Solyc08g061130.3.1;Solyc08g060840.1.1;Solyc08g081690.3.1
GO:0019842	vitamin binding	MOLECULAR_FUNCTION	0.00506996	6.10556e-05	1114	26	314	34694	Solyc10g076510.2.1;Solyc06g066830.4.1;Solyc06g073080.4.1;Solyc12g006450.2.1;Solyc09g089580.4.1;Solyc08g066620.3.1;Solyc09g089740.3.1;Solyc08g006770.3.1;Solyc08g079750.3.1;Solyc09g089720.4.1;Solyc08g066220.4.1;Solyc10g076840.2.1;Solyc01g095080.3.1;Solyc02g081190.5.1;Solyc03g123610.4.1;Solyc07g032740.4.1;Solyc08g066260.3.1;Solyc08g066240.3.1;Solyc02g067180.3.1;Solyc07g056670.3.1;Solyc11g011920.2.1;…
GO:0043169	cation binding	MOLECULAR_FUNCTION	0.00511843	6.2232e-05	1114	165	3642	34694	Solyc03g118810.1.1;Solyc05g008200.4.1;Solyc06g066830.4.1;Solyc10g083400.1.1;Solyc10g083150.3.1;Solyc03g005780.3.1;Solyc05g047530.3.1;Solyc09g089580.4.1;Solyc12g041980.3.1;Solyc07g042460.2.1;Solyc10g076840.2.1;Solyc04g083140.2.1;Solyc11g012680.3.1;Solyc02g070940.1.1;Solyc08g069120.4.1;Solyc01g105560.3.1;Solyc10g075030.3.1;Solyc12g010030.3.1;Solyc03g005000.4.1;Solyc12g006230.3.1;Solyc09g091440.3.1;…
GO:0009755	hormone-mediated signaling pathway	BIOLOGICAL_PROCESS	0.00524908	6.44283e-05	1114	36	510	34694	Solyc02g090390.4.1;Solyc06g050500.2.1;Solyc11g072480.2.1;Solyc09g075440.4.1;Solyc05g052030.1.1;Solyc05g009790.1.1;Solyc04g078640.3.1;Solyc12g056590.2.1;Solyc01g096050.4.1;Solyc10g052880.1.1;Solyc08g021820.3.1;Solyc04g012050.3.1;Solyc02g078550.3.1;Solyc11g064800.3.1;Solyc07g044980.3.1;Solyc06g073730.2.1;Solyc06g053710.3.1;Solyc05g014160.4.1;Solyc08g065320.3.1;Solyc05g055070.4.1;Solyc03g093610.1.1;…
GO:0097659	nucleic acid-templated transcription	BIOLOGICAL_PROCESS	0.00545885	6.7916e-05	1114	115	2356	34694	Solyc12g006700.3.1;Solyc02g069830.5.1;Solyc05g006540.3.1;Solyc12g041980.3.1;Solyc10g086000.3.1;Solyc04g009440.3.1;Solyc10g077110.1.1;Solyc12g160480.1.1;Solyc02g085600.1.1;Solyc09g008040.3.1;Solyc02g078550.3.1;Solyc08g060840.1.1;Solyc11g064800.3.1;Solyc12g089240.2.1;Solyc04g007000.3.1;Solyc04g079940.3.1;Solyc07g066330.3.1;Solyc02g077590.1.1;Solyc07g032480.3.1;Solyc07g043610.3.1;Solyc02g071730.2.1;…
GO:0045292	mRNA cis splicing, via spliceosome	BIOLOGICAL_PROCESS	0.00545885	6.82672e-05	1114	6	17	34694	Solyc05g009540.3.1;Solyc07g022760.5.1;Solyc10g006260.3.1;Solyc11g008470.2.1;Solyc11g008460.1.1;Solyc10g006250.3.1
GO:0010287	plastoglobule	CELLULAR_COMPONENT	0.00553629	6.98767e-05	1114	8	36	34694	Solyc03g005760.1.1;Solyc10g007690.3.1;Solyc03g005780.3.1;Solyc02g070940.1.1;Solyc06g063370.3.1;Solyc10g083350.2.1;Solyc03g005770.4.1;Solyc07g063600.3.1
GO:0032774	RNA biosynthetic process	BIOLOGICAL_PROCESS	0.0056529	7.26577e-05	1114	115	2369	34694	Solyc12g006700.3.1;Solyc02g069830.5.1;Solyc05g006540.3.1;Solyc12g041980.3.1;Solyc10g086000.3.1;Solyc04g009440.3.1;Solyc10g077110.1.1;Solyc12g160480.1.1;Solyc02g085600.1.1;Solyc09g008040.3.1;Solyc02g078550.3.1;Solyc08g060840.1.1;Solyc11g064800.3.1;Solyc12g089240.2.1;Solyc04g007000.3.1;Solyc04g079940.3.1;Solyc07g066330.3.1;Solyc02g077590.1.1;Solyc07g032480.3.1;Solyc07g043610.3.1;Solyc02g071730.2.1;…
GO:0046872	metal ion binding	MOLECULAR_FUNCTION	0.0056529	7.23753e-05	1114	164	3619	34694	Solyc03g118810.1.1;Solyc05g008200.4.1;Solyc06g066830.4.1;Solyc10g083400.1.1;Solyc10g083150.3.1;Solyc03g005780.3.1;Solyc05g047530.3.1;Solyc09g089580.4.1;Solyc12g041980.3.1;Solyc07g042460.2.1;Solyc10g076840.2.1;Solyc04g083140.2.1;Solyc11g012680.3.1;Solyc02g070940.1.1;Solyc08g069120.4.1;Solyc01g105560.3.1;Solyc10g075030.3.1;Solyc12g010030.3.1;Solyc03g005000.4.1;Solyc12g006230.3.1;Solyc09g091440.3.1;…
GO:0043228	non-membrane-bounded organelle	CELLULAR_COMPONENT	0.00629723	8.23978e-05	1114	29	1704	34694	Solyc02g071280.3.1;Solyc10g160390.1.1;Solyc08g066700.3.1;Solyc05g006540.3.1;Solyc12g041980.3.1;Solyc06g011540.4.1;Solyc11g005650.1.1;Solyc04g072036.2.1;Solyc01g091705.2.1;Solyc03g121950.3.1;Solyc02g094490.4.1;Solyc06g082010.4.1;Solyc01g111030.2.1;Solyc11g011160.1.1;Solyc01g090860.3.1;Solyc01g090780.3.1;Solyc11g008350.2.1;Solyc11g068770.1.1;Solyc01g079350.3.1;Solyc02g081010.3.1;Solyc01g009300.3.1;…
GO:0043232	intracellular non-membrane-bounded organelle	CELLULAR_COMPONENT	0.00629723	8.23978e-05	1114	29	1704	34694	Solyc02g071280.3.1;Solyc10g160390.1.1;Solyc08g066700.3.1;Solyc05g006540.3.1;Solyc12g041980.3.1;Solyc06g011540.4.1;Solyc11g005650.1.1;Solyc04g072036.2.1;Solyc01g091705.2.1;Solyc03g121950.3.1;Solyc02g094490.4.1;Solyc06g082010.4.1;Solyc01g111030.2.1;Solyc11g011160.1.1;Solyc01g090860.3.1;Solyc01g090780.3.1;Solyc11g008350.2.1;Solyc11g068770.1.1;Solyc01g079350.3.1;Solyc02g081010.3.1;Solyc01g009300.3.1;…
GO:0010109	regulation of photosynthesis	BIOLOGICAL_PROCESS	0.00670848	8.85557e-05	1114	6	18	34694	Solyc02g065400.3.1;Solyc01g079470.5.1;Solyc04g082910.1.1;Solyc09g065910.3.1;Solyc01g009120.3.1;Solyc07g066150.1.1
GO:0071310	cellular response to organic substance	BIOLOGICAL_PROCESS	0.00733118	9.81815e-05	1114	40	605	34694	Solyc02g090390.4.1;Solyc06g050500.2.1;Solyc11g072480.2.1;Solyc09g075440.4.1;Solyc05g052030.1.1;Solyc05g009790.1.1;Solyc04g078640.3.1;Solyc12g056590.2.1;Solyc01g096050.4.1;Solyc01g097330.3.1;Solyc10g052880.1.1;Solyc08g021820.3.1;Solyc04g012050.3.1;Solyc02g078550.3.1;Solyc10g076260.2.1;Solyc11g064800.3.1;Solyc07g044980.3.1;Solyc06g073730.2.1;Solyc06g053710.3.1;Solyc05g014160.4.1;Solyc08g065320.3.1;…
GO:0019438	aromatic compound biosynthetic process	BIOLOGICAL_PROCESS	0.00733118	9.84735e-05	1114	139	2988	34694	Solyc12g006700.3.1;Solyc02g069830.5.1;Solyc05g006540.3.1;Solyc03g117870.3.1;Solyc12g041980.3.1;Solyc10g086000.3.1;Solyc04g009440.3.1;Solyc10g077110.1.1;Solyc12g160480.1.1;Solyc02g085600.1.1;Solyc09g008040.3.1;Solyc02g078550.3.1;Solyc08g060840.1.1;Solyc11g064800.3.1;Solyc12g089240.2.1;Solyc04g007000.3.1;Solyc02g077510.4.1;Solyc04g079940.3.1;Solyc07g066330.3.1;Solyc01g105383.1.1;Solyc02g077590.1.1;…
GO:0004096	catalase activity	MOLECULAR_FUNCTION	0.00864107	0.000117069	1114	4	5	34694	Solyc12g094620.3.1;Solyc01g100640.4.1;Solyc07g032740.4.1;Solyc04g082450.3.1
GO:0009523	photosystem II	CELLULAR_COMPONENT	0.00885823	0.000121037	1114	13	106	34694	Solyc02g065400.3.1;Solyc10g006230.4.1;Solyc10g007690.3.1;Solyc03g005780.3.1;Solyc05g007780.3.1;Solyc06g063370.3.1;Solyc07g063600.3.1;Solyc07g066310.3.1;Solyc09g065910.3.1;Solyc03g005760.1.1;Solyc05g056050.3.1;Solyc02g070940.1.1;Solyc03g005770.4.1
GO:0043168	anion binding	MOLECULAR_FUNCTION	0.00931229	0.000128319	1114	174	3927	34694	Solyc01g008850.4.1;Solyc05g008200.4.1;Solyc06g066830.4.1;Solyc06g050500.2.1;Solyc03g117870.3.1;Solyc09g089580.4.1;Solyc08g074560.3.1;Solyc08g066620.3.1;Solyc11g007760.2.1;Solyc10g076840.2.1;Solyc01g102410.3.1;Solyc01g105560.3.1;Solyc07g032740.4.1;Solyc05g009540.3.1;Solyc11g011880.2.1;Solyc02g071820.5.1;Solyc09g098100.4.1;Solyc03g083420.4.1;Solyc02g080070.3.1;Solyc12g098700.1.1;Solyc01g095710.3.1;…
GO:0009507	chloroplast	CELLULAR_COMPONENT	0.0109133	0.000151644	1114	93	1855	34694	Solyc01g107860.3.1;Solyc10g007690.3.1;Solyc03g005780.3.1;Solyc03g111260.3.1;Solyc09g010120.2.1;Solyc01g090697.1.1;Solyc03g118340.3.1;Solyc02g083140.3.1;Solyc12g099970.2.1;Solyc01g009120.3.1;Solyc07g063600.3.1;Solyc11g008680.2.1;Solyc03g116460.4.1;Solyc06g068220.4.1;Solyc02g071190.4.1;Solyc10g078920.4.1;Solyc02g070940.1.1;Solyc07g056020.3.1;Solyc01g105560.3.1;Solyc02g079770.3.1;Solyc12g010030.3.1;…
GO:0009532	plastid stroma	CELLULAR_COMPONENT	0.0136957	0.000191892	1114	28	382	34694	Solyc01g107860.3.1;Solyc10g007690.3.1;Solyc03g005780.3.1;Solyc09g010120.2.1;Solyc08g061480.3.1;Solyc01g009120.3.1;Solyc07g063600.3.1;Solyc05g007070.2.1;Solyc11g008680.2.1;Solyc06g068220.4.1;Solyc03g005760.1.1;Solyc10g078920.4.1;Solyc02g070940.1.1;Solyc07g056020.3.1;Solyc01g105560.3.1;Solyc02g079770.3.1;Solyc02g072160.4.1;Solyc03g031860.3.1;Solyc01g067530.3.1;Solyc10g079840.2.1;Solyc12g042770.3.1;…
GO:0016604	nuclear body	CELLULAR_COMPONENT	0.0140204	0.000198065	1114	9	55	34694	Solyc02g078490.3.1;Solyc12g008750.3.1;Solyc08g069120.4.1;Solyc09g005980.4.1;Solyc07g056340.4.1;Solyc01g096180.4.1;Solyc04g074040.3.1;Solyc01g099810.3.1;Solyc11g072340.2.1
GO:0019902	phosphatase binding	MOLECULAR_FUNCTION	0.0142367	0.000204418	1114	5	13	34694	Solyc06g075160.3.1;Solyc02g069780.3.1;Solyc02g090390.4.1;Solyc01g009120.3.1;Solyc12g096670.2.1
GO:0019903	protein phosphatase binding	MOLECULAR_FUNCTION	0.0142367	0.000204418	1114	5	13	34694	Solyc06g075160.3.1;Solyc02g069780.3.1;Solyc02g090390.4.1;Solyc01g009120.3.1;Solyc12g096670.2.1
GO:0019684	photosynthesis, light reaction	BIOLOGICAL_PROCESS	0.0147405	0.000213359	1114	17	179	34694	Solyc02g065400.3.1;Solyc10g006230.4.1;Solyc06g074200.4.1;Solyc10g007690.3.1;Solyc03g005780.3.1;Solyc05g007780.3.1;Solyc06g063370.3.1;Solyc09g082460.3.1;Solyc01g009120.3.1;Solyc07g063600.3.1;Solyc07g066150.1.1;Solyc07g066310.3.1;Solyc09g065910.3.1;Solyc03g005760.1.1;Solyc05g056050.3.1;Solyc02g070940.1.1;Solyc03g005770.4.1
GO:0009890	negative regulation of biosynthetic process	BIOLOGICAL_PROCESS	0.0165158	0.000240967	1114	20	235	34694	Solyc01g067090.4.1;Solyc11g068770.1.1;Solyc08g075420.4.1;Solyc10g160390.1.1;Solyc01g087420.4.1;Solyc05g006540.3.1;Solyc01g087400.4.1;Solyc04g082910.1.1;Solyc06g073090.3.1;Solyc01g087340.3.1;Solyc12g041980.3.1;Solyc01g087370.2.1;Solyc02g078010.5.1;Solyc01g079470.5.1;Solyc04g078640.3.1;Solyc10g086000.3.1;Solyc02g078000.2.1;Solyc01g090780.3.1;Solyc02g078550.3.1;Solyc01g087410.4.1
GO:0006520	cellular amino acid metabolic process	BIOLOGICAL_PROCESS	0.0165308	0.0002431	1114	30	427	34694	Solyc11g011380.2.1;Solyc12g006450.2.1;Solyc01g090697.1.1;Solyc08g066620.3.1;Solyc09g014900.3.1;Solyc04g009960.3.1;Solyc10g011925.2.1;Solyc01g105420.4.1;Solyc01g095080.3.1;Solyc01g102410.3.1;Solyc04g082030.1.1;Solyc07g032740.4.1;Solyc01g106060.3.1;Solyc01g080170.3.1;Solyc08g074550.3.1;Solyc02g067180.3.1;Solyc09g082460.3.1;Solyc01g105383.1.1;Solyc11g011920.2.1;Solyc11g066890.1.1;Solyc07g065340.1.1;…
GO:0009570	chloroplast stroma	CELLULAR_COMPONENT	0.0205661	0.000304824	1114	27	374	34694	Solyc01g107860.3.1;Solyc10g007690.3.1;Solyc03g005780.3.1;Solyc09g010120.2.1;Solyc08g061480.3.1;Solyc01g009120.3.1;Solyc07g063600.3.1;Solyc05g007070.2.1;Solyc11g008680.2.1;Solyc06g068220.4.1;Solyc03g005760.1.1;Solyc10g078920.4.1;Solyc02g070940.1.1;Solyc07g056020.3.1;Solyc01g105560.3.1;Solyc02g079770.3.1;Solyc02g072160.4.1;Solyc01g067530.3.1;Solyc10g079840.2.1;Solyc12g042770.3.1;Solyc06g063370.3.1;…
GO:0003849	3-deoxy-7-phosphoheptulonate synthase activity	MOLECULAR_FUNCTION	0.0210563	0.000314528	1114	3	2	34694	Solyc01g105383.1.1;Solyc01g105420.4.1;Solyc01g105380.2.1
GO:1901575	organic substance catabolic process	BIOLOGICAL_PROCESS	0.0214477	0.000322858	1114	74	1436	34694	Solyc10g080740.2.1;Solyc12g009560.2.1;Solyc08g066700.3.1;Solyc10g083150.3.1;Solyc06g073860.2.1;Solyc05g051260.3.1;Solyc01g090697.1.1;Solyc04g009960.3.1;Solyc03g005020.3.1;Solyc06g053980.3.1;Solyc11g005650.1.1;Solyc10g011925.2.1;Solyc04g078540.5.1;Solyc12g008510.2.1;Solyc01g006190.3.1;Solyc08g065610.3.1;Solyc02g036290.4.1;Solyc11g070175.1.1;Solyc10g079840.2.1;Solyc11g032200.2.1;Solyc01g080170.3.1;…
GO:0140096	catalytic activity, acting on a protein	MOLECULAR_FUNCTION	0.0227804	0.000345557	1114	139	3080	34694	Solyc01g008850.4.1;Solyc10g083150.3.1;Solyc06g073860.2.1;Solyc01g068590.4.1;Solyc02g071250.3.1;Solyc08g074560.3.1;Solyc07g053550.3.1;Solyc06g069190.4.1;Solyc12g041980.3.1;Solyc01g009120.3.1;Solyc04g078540.5.1;Solyc11g007760.2.1;Solyc08g065610.3.1;Solyc02g071190.4.1;Solyc12g010030.3.1;Solyc03g005000.4.1;Solyc05g009540.3.1;Solyc11g011880.2.1;Solyc09g091440.3.1;Solyc02g071820.5.1;Solyc02g078550.3.1;…
GO:0018130	heterocycle biosynthetic process	BIOLOGICAL_PROCESS	0.0233047	0.000356209	1114	132	2897	34694	Solyc12g006700.3.1;Solyc02g069830.5.1;Solyc05g006540.3.1;Solyc12g041980.3.1;Solyc10g086000.3.1;Solyc04g009440.3.1;Solyc10g077110.1.1;Solyc01g105560.3.1;Solyc12g160480.1.1;Solyc02g085600.1.1;Solyc09g008040.3.1;Solyc02g078550.3.1;Solyc08g060840.1.1;Solyc11g064800.3.1;Solyc12g089240.2.1;Solyc04g007000.3.1;Solyc04g079940.3.1;Solyc07g066330.3.1;Solyc02g077590.1.1;Solyc07g032480.3.1;Solyc07g043610.3.1;…
GO:0070566	adenylyltransferase activity	MOLECULAR_FUNCTION	0.0259634	0.000399854	1114	6	25	34694	Solyc06g066460.3.1;Solyc01g058260.4.1;Solyc05g050280.3.1;Solyc01g090860.3.1;Solyc09g008310.3.1;Solyc06g066470.4.1
GO:0030170	pyridoxal phosphate binding	MOLECULAR_FUNCTION	0.0267682	0.000424	1114	13	122	34694	Solyc08g066240.3.1;Solyc02g067180.3.1;Solyc12g006450.2.1;Solyc08g066620.3.1;Solyc08g079750.3.1;Solyc11g011920.2.1;Solyc08g066220.4.1;Solyc01g095080.3.1;Solyc08g066250.4.1;Solyc03g123610.4.1;Solyc07g032740.4.1;Solyc08g066260.3.1;Solyc04g025530.3.1
GO:0097708	intracellular vesicle	CELLULAR_COMPONENT	0.0267682	0.000420352	1114	3	450	34694	Solyc06g065540.3.1;Solyc05g014160.4.1;Solyc05g008200.4.1
GO:0004652	polynucleotide adenylyltransferase activity	MOLECULAR_FUNCTION	0.0267682	0.000425709	1114	4	8	34694	Solyc06g066460.3.1;Solyc01g058260.4.1;Solyc01g090860.3.1;Solyc06g066470.4.1
GO:0070279	vitamin B6 binding	MOLECULAR_FUNCTION	0.0267682	0.000424	1114	13	122	34694	Solyc08g066240.3.1;Solyc02g067180.3.1;Solyc12g006450.2.1;Solyc08g066620.3.1;Solyc08g079750.3.1;Solyc11g011920.2.1;Solyc08g066220.4.1;Solyc01g095080.3.1;Solyc08g066250.4.1;Solyc03g123610.4.1;Solyc07g032740.4.1;Solyc08g066260.3.1;Solyc04g025530.3.1
GO:0045934	negative regulation of nucleobase-containing compound metabolic process	BIOLOGICAL_PROCESS	0.0267682	0.000427746	1114	17	191	34694	Solyc01g067090.4.1;Solyc08g075420.4.1;Solyc01g087420.4.1;Solyc05g006540.3.1;Solyc01g087400.4.1;Solyc01g087340.3.1;Solyc12g041980.3.1;Solyc01g087370.2.1;Solyc04g072036.2.1;Solyc02g078010.5.1;Solyc04g078640.3.1;Solyc10g086000.3.1;Solyc09g083380.5.1;Solyc02g078000.2.1;Solyc11g011160.1.1;Solyc02g078550.3.1;Solyc01g087410.4.1
GO:0015979	photosynthesis	BIOLOGICAL_PROCESS	0.0306499	0.000493323	1114	24	318	34694	Solyc02g065400.3.1;Solyc06g054260.1.1;Solyc10g006230.4.1;Solyc06g074200.4.1;Solyc10g007690.3.1;Solyc03g005780.3.1;Solyc05g007780.3.1;Solyc06g063370.3.1;Solyc09g082460.3.1;Solyc04g082910.1.1;Solyc01g009120.3.1;Solyc07g063600.3.1;Solyc07g066150.1.1;Solyc01g079470.5.1;Solyc06g082950.5.1;Solyc07g066310.3.1;Solyc06g066640.3.1;Solyc09g065910.3.1;Solyc03g005760.1.1;Solyc05g056050.3.1;Solyc02g070940.1.1;…
GO:0051253	negative regulation of RNA metabolic process	BIOLOGICAL_PROCESS	0.0320683	0.000523302	1114	15	159	34694	Solyc01g067090.4.1;Solyc08g075420.4.1;Solyc01g087420.4.1;Solyc05g006540.3.1;Solyc01g087400.4.1;Solyc01g087340.3.1;Solyc12g041980.3.1;Solyc01g087370.2.1;Solyc04g072036.2.1;Solyc02g078010.5.1;Solyc04g078640.3.1;Solyc10g086000.3.1;Solyc02g078000.2.1;Solyc02g078550.3.1;Solyc01g087410.4.1
GO:0046907	intracellular transport	BIOLOGICAL_PROCESS	0.0320683	0.000523579	1114	9	750	34694	Solyc02g090130.4.1;Solyc01g006950.3.1;Solyc10g085970.3.1;Solyc11g005030.3.1;Solyc10g074630.3.1;Solyc12g099270.2.1;Solyc06g007800.5.1;Solyc11g008350.2.1;Solyc02g082450.3.1
GO:0005975	carbohydrate metabolic process	BIOLOGICAL_PROCESS	0.0325139	0.00053462	1114	58	1068	34694	Solyc05g051260.3.1;Solyc02g069580.3.1;Solyc01g110000.3.1;Solyc12g008510.2.1;Solyc06g062660.4.1;Solyc11g070175.1.1;Solyc06g060170.3.1;Solyc05g007960.4.1;Solyc01g005560.3.1;Solyc02g082930.3.1;Solyc06g073760.3.1;Solyc04g082910.1.1;Solyc12g088200.3.1;Solyc12g055930.3.1;Solyc02g089120.4.1;Solyc09g009020.3.1;Solyc10g055800.2.1;Solyc01g111340.4.1;Solyc09g009260.3.1;Solyc04g076880.3.1;Solyc01g010250.4.1;…
GO:0006464	cellular protein modification process	BIOLOGICAL_PROCESS	0.0335568	0.000563424	1114	135	3019	34694	Solyc01g008850.4.1;Solyc06g050500.2.1;Solyc10g083150.3.1;Solyc06g073860.2.1;Solyc01g068590.4.1;Solyc03g005780.3.1;Solyc02g071250.3.1;Solyc05g006540.3.1;Solyc08g074560.3.1;Solyc12g041980.3.1;Solyc11g005650.1.1;Solyc01g009120.3.1;Solyc11g007760.2.1;Solyc02g070940.1.1;Solyc05g009540.3.1;Solyc11g011880.2.1;Solyc09g091440.3.1;Solyc02g071820.5.1;Solyc07g043130.3.1;Solyc02g078550.3.1;Solyc03g115680.4.1;…
GO:0036211	protein modification process	BIOLOGICAL_PROCESS	0.0335568	0.000563424	1114	135	3019	34694	Solyc01g008850.4.1;Solyc06g050500.2.1;Solyc10g083150.3.1;Solyc06g073860.2.1;Solyc01g068590.4.1;Solyc03g005780.3.1;Solyc02g071250.3.1;Solyc05g006540.3.1;Solyc08g074560.3.1;Solyc12g041980.3.1;Solyc11g005650.1.1;Solyc01g009120.3.1;Solyc11g007760.2.1;Solyc02g070940.1.1;Solyc05g009540.3.1;Solyc11g011880.2.1;Solyc09g091440.3.1;Solyc02g071820.5.1;Solyc07g043130.3.1;Solyc02g078550.3.1;Solyc03g115680.4.1;…
GO:0045935	positive regulation of nucleobase-containing compound metabolic process	BIOLOGICAL_PROCESS	0.0335568	0.000556073	1114	30	448	34694	Solyc12g006700.3.1;Solyc01g087420.4.1;Solyc06g053220.3.1;Solyc07g053910.3.1;Solyc01g087340.3.1;Solyc12g041980.3.1;Solyc01g087370.2.1;Solyc06g061030.3.1;Solyc02g084630.3.1;Solyc02g085630.3.1;Solyc12g160480.1.1;Solyc08g077230.3.1;Solyc09g008040.3.1;Solyc03g114840.3.1;Solyc01g090780.3.1;Solyc02g083320.3.1;Solyc08g060840.1.1;Solyc11g064800.3.1;Solyc01g087410.4.1;Solyc11g068770.1.1;Solyc07g065500.2.1;…
GO:0019725	cellular homeostasis	BIOLOGICAL_PROCESS	0.0357	0.000603543	1114	14	144	34694	Solyc05g053100.3.1;Solyc01g107860.3.1;Solyc12g006700.3.1;Solyc02g068260.3.1;Solyc07g062700.3.1;Solyc02g064950.3.1;Solyc12g008510.2.1;Solyc02g093140.4.1;Solyc10g078920.4.1;Solyc12g160480.1.1;Solyc01g097330.3.1;Solyc03g082620.4.1;Solyc06g071100.4.1;Solyc08g081770.3.1
GO:0031410	cytoplasmic vesicle	CELLULAR_COMPONENT	0.0367928	0.000626279	1114	3	449	34694	Solyc06g065540.3.1;Solyc05g014160.4.1;Solyc05g008200.4.1
GO:0034613	cellular protein localization	BIOLOGICAL_PROCESS	0.0376699	0.000645571	1114	6	601	34694	Solyc02g090130.4.1;Solyc11g005030.3.1;Solyc10g086560.3.1;Solyc10g074630.3.1;Solyc06g007800.5.1;Solyc01g006950.3.1
GO:1901605	alpha-amino acid metabolic process	BIOLOGICAL_PROCESS	0.0378181	0.000660345	1114	21	273	34694	Solyc11g011380.2.1;Solyc02g067180.3.1;Solyc09g082460.3.1;Solyc01g090697.1.1;Solyc08g066620.3.1;Solyc09g014900.3.1;Solyc04g009960.3.1;Solyc11g011920.2.1;Solyc11g066890.1.1;Solyc10g011925.2.1;Solyc01g095080.3.1;Solyc07g065340.1.1;Solyc10g054440.3.1;Solyc04g082030.1.1;Solyc01g094790.3.1;Solyc06g006100.3.1;Solyc01g090693.1.1;Solyc03g083440.4.1;Solyc01g106060.3.1;Solyc04g025530.3.1;Solyc01g080170.3.1
GO:0016773	phosphotransferase activity, alcohol group as acceptor	MOLECULAR_FUNCTION	0.0378181	0.000661247	1114	74	1473	34694	Solyc01g008850.4.1;Solyc05g008200.4.1;Solyc08g074560.3.1;Solyc08g077780.3.1;Solyc11g007760.2.1;Solyc12g008510.2.1;Solyc07g062080.4.1;Solyc05g056200.1.1;Solyc05g009540.3.1;Solyc11g011880.2.1;Solyc05g008930.3.1;Solyc02g071820.5.1;Solyc07g055690.1.1;Solyc11g008960.3.1;Solyc03g083420.4.1;Solyc02g080070.3.1;Solyc02g090430.3.1;Solyc07g063000.4.1;Solyc05g015610.3.1;Solyc10g055720.2.1;Solyc03g114210.3.1;…
GO:0070727	cellular macromolecule localization	BIOLOGICAL_PROCESS	0.0378181	0.000654781	1114	6	603	34694	Solyc02g090130.4.1;Solyc11g005030.3.1;Solyc10g086560.3.1;Solyc10g074630.3.1;Solyc06g007800.5.1;Solyc01g006950.3.1
GO:0031325	positive regulation of cellular metabolic process	BIOLOGICAL_PROCESS	0.0385665	0.000678798	1114	36	577	34694	Solyc12g006700.3.1;Solyc01g087420.4.1;Solyc06g053220.3.1;Solyc07g053910.3.1;Solyc01g087340.3.1;Solyc12g041980.3.1;Solyc01g087370.2.1;Solyc04g072036.2.1;Solyc06g061030.3.1;Solyc02g036290.4.1;Solyc02g084630.3.1;Solyc02g085630.3.1;Solyc02g036300.3.1;Solyc12g160480.1.1;Solyc08g077230.3.1;Solyc09g008040.3.1;Solyc03g114840.3.1;Solyc01g090780.3.1;Solyc02g083320.3.1;Solyc10g076260.2.1;Solyc08g060840.1.1;…
GO:0015934	large ribosomal subunit	CELLULAR_COMPONENT	0.0386527	0.000684791	1114	0	238	34694
GO:0031982	vesicle	CELLULAR_COMPONENT	0.0398765	0.000711091	1114	4	491	34694	Solyc06g065540.3.1;Solyc05g014160.4.1;Solyc05g008200.4.1;Solyc06g068600.3.1
GO:0034641	cellular nitrogen compound metabolic process	BIOLOGICAL_PROCESS	0.0404818	0.000726572	1114	237	5796	34694	Solyc07g006130.3.1;Solyc01g009120.3.1;Solyc08g005190.4.1;Solyc04g009440.3.1;Solyc01g102410.3.1;Solyc08g069120.4.1;Solyc01g105560.3.1;Solyc02g085600.1.1;Solyc10g009330.3.1;Solyc09g008040.3.1;Solyc05g009540.3.1;Solyc10g079840.2.1;Solyc02g078550.3.1;Solyc08g060840.1.1;Solyc11g064800.3.1;Solyc12g089240.2.1;Solyc12g098700.1.1;Solyc01g095710.3.1;Solyc07g032480.3.1;Solyc07g043610.3.1;Solyc02g077490.4.1;…
GO:0051254	positive regulation of RNA metabolic process	BIOLOGICAL_PROCESS	0.0424385	0.000766606	1114	29	436	34694	Solyc12g006700.3.1;Solyc01g087420.4.1;Solyc06g053220.3.1;Solyc07g053910.3.1;Solyc01g087340.3.1;Solyc12g041980.3.1;Solyc01g087370.2.1;Solyc06g061030.3.1;Solyc02g084630.3.1;Solyc02g085630.3.1;Solyc12g160480.1.1;Solyc08g077230.3.1;Solyc09g008040.3.1;Solyc03g114840.3.1;Solyc01g090780.3.1;Solyc02g083320.3.1;Solyc08g060840.1.1;Solyc11g064800.3.1;Solyc01g087410.4.1;Solyc11g068770.1.1;Solyc07g065500.2.1;…
GO:0009536	plastid	CELLULAR_COMPONENT	0.0433978	0.00078896	1114	97	2055	34694	Solyc01g107860.3.1;Solyc03g005780.3.1;Solyc03g111260.3.1;Solyc12g099970.2.1;Solyc01g009120.3.1;Solyc06g068220.4.1;Solyc02g071190.4.1;Solyc10g078920.4.1;Solyc02g070940.1.1;Solyc01g105560.3.1;Solyc12g010030.3.1;Solyc09g008040.3.1;Solyc10g079840.2.1;Solyc12g010020.3.1;Solyc06g063370.3.1;Solyc07g063000.4.1;Solyc01g105383.1.1;Solyc09g090460.3.1;Solyc02g070800.2.1;Solyc06g009160.4.1;Solyc02g093140.4.1;…
GO:0016180	snRNA processing	BIOLOGICAL_PROCESS	0.0444166	0.000817768	1114	4	10	34694	Solyc02g064590.2.1;Solyc08g066700.3.1;Solyc03g097460.3.1;Solyc02g064620.2.1
GO:0071470	cellular response to osmotic stress	BIOLOGICAL_PROCESS	0.0444166	0.000817768	1114	4	10	34694	Solyc12g006700.3.1;Solyc12g160480.1.1;Solyc07g062700.3.1;Solyc08g081690.3.1
GO:0009058	biosynthetic process	BIOLOGICAL_PROCESS	0.0463518	0.000861254	1114	219	5313	34694	Solyc05g008200.4.1;Solyc07g006130.3.1;Solyc03g117870.3.1;Solyc09g089580.4.1;Solyc08g005190.4.1;Solyc04g009440.3.1;Solyc01g102410.3.1;Solyc01g105560.3.1;Solyc07g032170.3.1;Solyc02g085600.1.1;Solyc09g008040.3.1;Solyc10g079840.2.1;Solyc02g078550.3.1;Solyc08g060840.1.1;Solyc11g064800.3.1;Solyc12g089240.2.1;Solyc01g105383.1.1;Solyc01g088400.4.1;Solyc07g032480.3.1;Solyc07g043610.3.1;Solyc02g071730.2.1;…
GO:0045454	cell redox homeostasis	BIOLOGICAL_PROCESS	0.0463518	0.000864131	1114	5	19	34694	Solyc05g053100.3.1;Solyc01g107860.3.1;Solyc02g093140.4.1;Solyc10g078920.4.1;Solyc02g064950.3.1
GO:0005840	ribosome	CELLULAR_COMPONENT	0.046571	0.000873611	1114	6	588	34694	Solyc02g071280.3.1;Solyc06g073090.3.1;Solyc11g005650.1.1;Solyc04g072036.2.1;Solyc09g010110.3.1;Solyc11g068430.3.1

## Sheet: Locule_down.slim
GO ID	GO Name	GO Category	FDR	P-Value	Total DEGs	DEGs annotated	Genes annotated	Total genes	Genes
GO:0009416	response to light stimulus	BIOLOGICAL_PROCESS	1.3046e-05	4.38091e-08	1114	30	269	34694	Solyc04g071990.3.1;Solyc02g090390.4.1;Solyc10g007690.3.1;Solyc03g005780.3.1;Solyc03g111260.3.1;Solyc07g063600.3.1;Solyc04g072036.2.1;Solyc11g005190.3.1;Solyc10g086000.3.1;Solyc10g086560.3.1;Solyc03g005760.1.1;Solyc02g070940.1.1;Solyc09g008040.3.1;Solyc01g067530.3.1;Solyc04g017690.3.1;Solyc07g062160.3.1;Solyc07g043130.3.1;Solyc08g065870.4.1;Solyc08g060840.1.1;Solyc12g089240.2.1;Solyc10g006230.4.1;…
GO:0048511	rhythmic process	BIOLOGICAL_PROCESS	1.39126e-05	4.99411e-08	1114	14	57	34694	Solyc03g081270.2.1;Solyc06g069690.4.1;Solyc04g071990.3.1;Solyc03g081240.3.1;Solyc04g049680.2.1;Solyc03g117870.3.1;Solyc01g108100.3.1;Solyc10g005030.4.1;Solyc10g086000.3.1;Solyc04g009050.4.1;Solyc01g097330.3.1;Solyc04g049670.4.1;Solyc08g060840.1.1;Solyc12g056650.2.1
GO:0009768	photosynthesis, light harvesting in photosystem I	BIOLOGICAL_PROCESS	5.62485e-05	2.73557e-07	1114	9	21	34694	Solyc10g006230.4.1;Solyc03g005760.1.1;Solyc05g056050.3.1;Solyc10g007690.3.1;Solyc03g005780.3.1;Solyc02g070940.1.1;Solyc06g063370.3.1;Solyc03g005770.4.1;Solyc07g063600.3.1
GO:0009522	photosystem I	CELLULAR_COMPONENT	9.66287e-05	5.19328e-07	1114	14	71	34694	Solyc06g054260.1.1;Solyc10g006230.4.1;Solyc06g074200.4.1;Solyc10g007690.3.1;Solyc03g005780.3.1;Solyc06g063370.3.1;Solyc07g063600.3.1;Solyc07g066150.1.1;Solyc06g082950.5.1;Solyc06g066640.3.1;Solyc03g005760.1.1;Solyc05g056050.3.1;Solyc02g070940.1.1;Solyc03g005770.4.1
GO:0009873	ethylene-activated signaling pathway	BIOLOGICAL_PROCESS	0.000151358	9.28897e-07	1114	18	126	34694	Solyc06g073730.2.1;Solyc09g075440.4.1;Solyc05g052030.1.1;Solyc05g009790.1.1;Solyc06g053710.3.1;Solyc08g065320.3.1;Solyc05g055070.4.1;Solyc03g093610.1.1;Solyc09g089930.3.1;Solyc04g078640.3.1;Solyc09g089610.3.1;Solyc09g075420.3.1;Solyc12g056590.2.1;Solyc04g071770.3.1;Solyc05g052050.1.1;Solyc09g090070.1.1;Solyc04g012050.3.1;Solyc04g051360.3.1
GO:0005777	peroxisome	CELLULAR_COMPONENT	0.000223718	1.50251e-06	1114	17	117	34694	Solyc12g094620.3.1;Solyc03g031880.3.1;Solyc03g032010.4.1;Solyc02g067580.3.1;Solyc02g079170.3.1;Solyc12g094520.2.1;Solyc09g061840.5.1;Solyc07g047800.3.1;Solyc05g052640.3.1;Solyc02g036290.4.1;Solyc06g009160.4.1;Solyc02g036300.3.1;Solyc03g032020.5.1;Solyc01g100640.4.1;Solyc03g111170.3.1;Solyc01g108010.3.1;Solyc04g082450.3.1
GO:0016310	phosphorylation	BIOLOGICAL_PROCESS	0.000614566	4.8391e-06	1114	100	1861	34694	Solyc05g014510.3.1;Solyc01g008850.4.1;Solyc05g008200.4.1;Solyc08g074560.3.1;Solyc12g099970.2.1;Solyc11g007760.2.1;Solyc05g009540.3.1;Solyc11g011880.2.1;Solyc02g071820.5.1;Solyc03g083420.4.1;Solyc02g080070.3.1;Solyc07g063000.4.1;Solyc07g032480.3.1;Solyc12g088200.3.1;Solyc09g009020.3.1;Solyc04g076880.3.1;Solyc06g068990.4.1;Solyc03g006630.3.1;Solyc03g097130.3.1;Solyc12g044270.2.1;Solyc05g051050.3.1;…
GO:0004398	histidine decarboxylase activity	MOLECULAR_FUNCTION	0.000635594	5.15187e-06	1114	4	1	34694	Solyc08g066240.3.1;Solyc08g066250.4.1;Solyc08g066260.3.1;Solyc08g066220.4.1
GO:0006355	regulation of transcription, DNA-templated	BIOLOGICAL_PROCESS	0.000692661	5.85506e-06	1114	112	2147	34694	Solyc12g006700.3.1;Solyc02g069830.5.1;Solyc05g006540.3.1;Solyc12g041980.3.1;Solyc10g086000.3.1;Solyc04g009440.3.1;Solyc10g077110.1.1;Solyc12g160480.1.1;Solyc02g085600.1.1;Solyc09g008040.3.1;Solyc02g078550.3.1;Solyc08g060840.1.1;Solyc11g064800.3.1;Solyc12g089240.2.1;Solyc04g007000.3.1;Solyc04g079940.3.1;Solyc07g066330.3.1;Solyc02g077590.1.1;Solyc07g032480.3.1;Solyc07g043610.3.1;Solyc02g071730.2.1;…
GO:0016607	nuclear speck	CELLULAR_COMPONENT	0.00082034	7.40928e-06	1114	9	34	34694	Solyc02g078490.3.1;Solyc12g008750.3.1;Solyc08g069120.4.1;Solyc09g005980.4.1;Solyc07g056340.4.1;Solyc01g096180.4.1;Solyc04g074040.3.1;Solyc01g099810.3.1;Solyc11g072340.2.1
GO:0003735	structural constituent of ribosome	MOLECULAR_FUNCTION	0.000972338	9.0073e-06	1114	2	526	34694	Solyc11g005650.1.1;Solyc09g010110.3.1
GO:0032039	integrator complex	CELLULAR_COMPONENT	0.0030335	3.30187e-05	1114	3	0	34694	Solyc03g097460.3.1;Solyc02g064620.2.1;Solyc02g064590.2.1
GO:0003700	DNA-binding transcription factor activity	MOLECULAR_FUNCTION	0.00306128	3.36755e-05	1114	69	1214	34694	Solyc12g006700.3.1;Solyc02g069830.5.1;Solyc06g053220.3.1;Solyc05g052030.1.1;Solyc03g026020.3.1;Solyc02g021680.3.1;Solyc03g119370.2.1;Solyc06g061030.3.1;Solyc12g056590.2.1;Solyc10g077110.1.1;Solyc12g160480.1.1;Solyc02g032950.3.1;Solyc02g085600.1.1;Solyc08g082750.3.1;Solyc09g008040.3.1;Solyc08g013900.3.1;Solyc08g060840.1.1;Solyc06g005680.4.1;Solyc04g007000.3.1;Solyc01g091630.3.1;Solyc02g077590.1.1;…
GO:0015031	protein transport	BIOLOGICAL_PROCESS	0.0037856	4.29584e-05	1114	7	760	34694	Solyc02g090130.4.1;Solyc01g006950.3.1;Solyc11g005030.3.1;Solyc10g074630.3.1;Solyc06g007800.5.1;Solyc03g043960.3.1;Solyc09g018370.4.1
GO:0016301	kinase activity	MOLECULAR_FUNCTION	0.00489538	5.72526e-05	1114	91	1756	34694	Solyc05g014510.3.1;Solyc01g008850.4.1;Solyc05g008200.4.1;Solyc09g075390.4.1;Solyc08g074560.3.1;Solyc03g063600.4.1;Solyc12g099970.2.1;Solyc08g077780.3.1;Solyc11g007760.2.1;Solyc12g008510.2.1;Solyc07g062080.4.1;Solyc05g056200.1.1;Solyc10g052880.1.1;Solyc05g009540.3.1;Solyc11g011880.2.1;Solyc05g008930.3.1;Solyc02g071820.5.1;Solyc07g055690.1.1;Solyc11g008960.3.1;Solyc03g083420.4.1;Solyc02g080070.3.1;…
GO:0045292	mRNA cis splicing, via spliceosome	BIOLOGICAL_PROCESS	0.00545885	6.82672e-05	1114	6	17	34694	Solyc05g009540.3.1;Solyc07g022760.5.1;Solyc10g006260.3.1;Solyc11g008470.2.1;Solyc11g008460.1.1;Solyc10g006250.3.1
GO:0010287	plastoglobule	CELLULAR_COMPONENT	0.00553629	6.98767e-05	1114	8	36	34694	Solyc03g005760.1.1;Solyc10g007690.3.1;Solyc03g005780.3.1;Solyc02g070940.1.1;Solyc06g063370.3.1;Solyc10g083350.2.1;Solyc03g005770.4.1;Solyc07g063600.3.1
GO:0046872	metal ion binding	MOLECULAR_FUNCTION	0.0056529	7.23753e-05	1114	164	3619	34694	Solyc03g118810.1.1;Solyc05g008200.4.1;Solyc06g066830.4.1;Solyc10g083400.1.1;Solyc10g083150.3.1;Solyc03g005780.3.1;Solyc05g047530.3.1;Solyc09g089580.4.1;Solyc12g041980.3.1;Solyc07g042460.2.1;Solyc10g076840.2.1;Solyc04g083140.2.1;Solyc11g012680.3.1;Solyc02g070940.1.1;Solyc08g069120.4.1;Solyc01g105560.3.1;Solyc10g075030.3.1;Solyc12g010030.3.1;Solyc03g005000.4.1;Solyc12g006230.3.1;Solyc09g091440.3.1;…
GO:0010109	regulation of photosynthesis	BIOLOGICAL_PROCESS	0.00670848	8.85557e-05	1114	6	18	34694	Solyc02g065400.3.1;Solyc01g079470.5.1;Solyc04g082910.1.1;Solyc09g065910.3.1;Solyc01g009120.3.1;Solyc07g066150.1.1
GO:0004096	catalase activity	MOLECULAR_FUNCTION	0.00864107	0.000117069	1114	4	5	34694	Solyc12g094620.3.1;Solyc01g100640.4.1;Solyc07g032740.4.1;Solyc04g082450.3.1
GO:0009523	photosystem II	CELLULAR_COMPONENT	0.00885823	0.000121037	1114	13	106	34694	Solyc02g065400.3.1;Solyc10g006230.4.1;Solyc10g007690.3.1;Solyc03g005780.3.1;Solyc05g007780.3.1;Solyc06g063370.3.1;Solyc07g063600.3.1;Solyc07g066310.3.1;Solyc09g065910.3.1;Solyc03g005760.1.1;Solyc05g056050.3.1;Solyc02g070940.1.1;Solyc03g005770.4.1
GO:0019903	protein phosphatase binding	MOLECULAR_FUNCTION	0.0142367	0.000204418	1114	5	13	34694	Solyc06g075160.3.1;Solyc02g069780.3.1;Solyc02g090390.4.1;Solyc01g009120.3.1;Solyc12g096670.2.1
GO:0009890	negative regulation of biosynthetic process	BIOLOGICAL_PROCESS	0.0165158	0.000240967	1114	20	235	34694	Solyc01g067090.4.1;Solyc11g068770.1.1;Solyc08g075420.4.1;Solyc10g160390.1.1;Solyc01g087420.4.1;Solyc05g006540.3.1;Solyc01g087400.4.1;Solyc04g082910.1.1;Solyc06g073090.3.1;Solyc01g087340.3.1;Solyc12g041980.3.1;Solyc01g087370.2.1;Solyc02g078010.5.1;Solyc01g079470.5.1;Solyc04g078640.3.1;Solyc10g086000.3.1;Solyc02g078000.2.1;Solyc01g090780.3.1;Solyc02g078550.3.1;Solyc01g087410.4.1
GO:0003849	3-deoxy-7-phosphoheptulonate synthase activity	MOLECULAR_FUNCTION	0.0210563	0.000314528	1114	3	2	34694	Solyc01g105383.1.1;Solyc01g105420.4.1;Solyc01g105380.2.1
GO:1901575	organic substance catabolic process	BIOLOGICAL_PROCESS	0.0214477	0.000322858	1114	74	1436	34694	Solyc10g080740.2.1;Solyc12g009560.2.1;Solyc08g066700.3.1;Solyc10g083150.3.1;Solyc06g073860.2.1;Solyc05g051260.3.1;Solyc01g090697.1.1;Solyc04g009960.3.1;Solyc03g005020.3.1;Solyc06g053980.3.1;Solyc11g005650.1.1;Solyc10g011925.2.1;Solyc04g078540.5.1;Solyc12g008510.2.1;Solyc01g006190.3.1;Solyc08g065610.3.1;Solyc02g036290.4.1;Solyc11g070175.1.1;Solyc10g079840.2.1;Solyc11g032200.2.1;Solyc01g080170.3.1;…
GO:0140096	catalytic activity, acting on a protein	MOLECULAR_FUNCTION	0.0227804	0.000345557	1114	139	3080	34694	Solyc01g008850.4.1;Solyc10g083150.3.1;Solyc06g073860.2.1;Solyc01g068590.4.1;Solyc02g071250.3.1;Solyc08g074560.3.1;Solyc07g053550.3.1;Solyc06g069190.4.1;Solyc12g041980.3.1;Solyc01g009120.3.1;Solyc04g078540.5.1;Solyc11g007760.2.1;Solyc08g065610.3.1;Solyc02g071190.4.1;Solyc12g010030.3.1;Solyc03g005000.4.1;Solyc05g009540.3.1;Solyc11g011880.2.1;Solyc09g091440.3.1;Solyc02g071820.5.1;Solyc02g078550.3.1;…
GO:0004652	polynucleotide adenylyltransferase activity	MOLECULAR_FUNCTION	0.0267682	0.000425709	1114	4	8	34694	Solyc06g066460.3.1;Solyc01g058260.4.1;Solyc01g090860.3.1;Solyc06g066470.4.1
GO:0030170	pyridoxal phosphate binding	MOLECULAR_FUNCTION	0.0267682	0.000424	1114	13	122	34694	Solyc08g066240.3.1;Solyc02g067180.3.1;Solyc12g006450.2.1;Solyc08g066620.3.1;Solyc08g079750.3.1;Solyc11g011920.2.1;Solyc08g066220.4.1;Solyc01g095080.3.1;Solyc08g066250.4.1;Solyc03g123610.4.1;Solyc07g032740.4.1;Solyc08g066260.3.1;Solyc04g025530.3.1
GO:0046907	intracellular transport	BIOLOGICAL_PROCESS	0.0320683	0.000523579	1114	9	750	34694	Solyc02g090130.4.1;Solyc01g006950.3.1;Solyc10g085970.3.1;Solyc11g005030.3.1;Solyc10g074630.3.1;Solyc12g099270.2.1;Solyc06g007800.5.1;Solyc11g008350.2.1;Solyc02g082450.3.1
GO:0051253	negative regulation of RNA metabolic process	BIOLOGICAL_PROCESS	0.0320683	0.000523302	1114	15	159	34694	Solyc01g067090.4.1;Solyc08g075420.4.1;Solyc01g087420.4.1;Solyc05g006540.3.1;Solyc01g087400.4.1;Solyc01g087340.3.1;Solyc12g041980.3.1;Solyc01g087370.2.1;Solyc04g072036.2.1;Solyc02g078010.5.1;Solyc04g078640.3.1;Solyc10g086000.3.1;Solyc02g078000.2.1;Solyc02g078550.3.1;Solyc01g087410.4.1
GO:0005975	carbohydrate metabolic process	BIOLOGICAL_PROCESS	0.0325139	0.00053462	1114	58	1068	34694	Solyc05g051260.3.1;Solyc02g069580.3.1;Solyc01g110000.3.1;Solyc12g008510.2.1;Solyc06g062660.4.1;Solyc11g070175.1.1;Solyc06g060170.3.1;Solyc05g007960.4.1;Solyc01g005560.3.1;Solyc02g082930.3.1;Solyc06g073760.3.1;Solyc04g082910.1.1;Solyc12g088200.3.1;Solyc12g055930.3.1;Solyc02g089120.4.1;Solyc09g009020.3.1;Solyc10g055800.2.1;Solyc01g111340.4.1;Solyc09g009260.3.1;Solyc04g076880.3.1;Solyc01g010250.4.1;…
GO:0006464	cellular protein modification process	BIOLOGICAL_PROCESS	0.0335568	0.000563424	1114	135	3019	34694	Solyc01g008850.4.1;Solyc06g050500.2.1;Solyc10g083150.3.1;Solyc06g073860.2.1;Solyc01g068590.4.1;Solyc03g005780.3.1;Solyc02g071250.3.1;Solyc05g006540.3.1;Solyc08g074560.3.1;Solyc12g041980.3.1;Solyc11g005650.1.1;Solyc01g009120.3.1;Solyc11g007760.2.1;Solyc02g070940.1.1;Solyc05g009540.3.1;Solyc11g011880.2.1;Solyc09g091440.3.1;Solyc02g071820.5.1;Solyc07g043130.3.1;Solyc02g078550.3.1;Solyc03g115680.4.1;…
GO:0031410	cytoplasmic vesicle	CELLULAR_COMPONENT	0.0367928	0.000626279	1114	3	449	34694	Solyc06g065540.3.1;Solyc05g014160.4.1;Solyc05g008200.4.1
GO:0034613	cellular protein localization	BIOLOGICAL_PROCESS	0.0376699	0.000645571	1114	6	601	34694	Solyc02g090130.4.1;Solyc11g005030.3.1;Solyc10g086560.3.1;Solyc10g074630.3.1;Solyc06g007800.5.1;Solyc01g006950.3.1
GO:1901605	alpha-amino acid metabolic process	BIOLOGICAL_PROCESS	0.0378181	0.000660345	1114	21	273	34694	Solyc11g011380.2.1;Solyc02g067180.3.1;Solyc09g082460.3.1;Solyc01g090697.1.1;Solyc08g066620.3.1;Solyc09g014900.3.1;Solyc04g009960.3.1;Solyc11g011920.2.1;Solyc11g066890.1.1;Solyc10g011925.2.1;Solyc01g095080.3.1;Solyc07g065340.1.1;Solyc10g054440.3.1;Solyc04g082030.1.1;Solyc01g094790.3.1;Solyc06g006100.3.1;Solyc01g090693.1.1;Solyc03g083440.4.1;Solyc01g106060.3.1;Solyc04g025530.3.1;Solyc01g080170.3.1
GO:0016773	phosphotransferase activity, alcohol group as acceptor	MOLECULAR_FUNCTION	0.0378181	0.000661247	1114	74	1473	34694	Solyc01g008850.4.1;Solyc05g008200.4.1;Solyc08g074560.3.1;Solyc08g077780.3.1;Solyc11g007760.2.1;Solyc12g008510.2.1;Solyc07g062080.4.1;Solyc05g056200.1.1;Solyc05g009540.3.1;Solyc11g011880.2.1;Solyc05g008930.3.1;Solyc02g071820.5.1;Solyc07g055690.1.1;Solyc11g008960.3.1;Solyc03g083420.4.1;Solyc02g080070.3.1;Solyc02g090430.3.1;Solyc07g063000.4.1;Solyc05g015610.3.1;Solyc10g055720.2.1;Solyc03g114210.3.1;…
GO:0015934	large ribosomal subunit	CELLULAR_COMPONENT	0.0386527	0.000684791	1114	0	238	34694
GO:0051254	positive regulation of RNA metabolic process	BIOLOGICAL_PROCESS	0.0424385	0.000766606	1114	29	436	34694	Solyc12g006700.3.1;Solyc01g087420.4.1;Solyc06g053220.3.1;Solyc07g053910.3.1;Solyc01g087340.3.1;Solyc12g041980.3.1;Solyc01g087370.2.1;Solyc06g061030.3.1;Solyc02g084630.3.1;Solyc02g085630.3.1;Solyc12g160480.1.1;Solyc08g077230.3.1;Solyc09g008040.3.1;Solyc03g114840.3.1;Solyc01g090780.3.1;Solyc02g083320.3.1;Solyc08g060840.1.1;Solyc11g064800.3.1;Solyc01g087410.4.1;Solyc11g068770.1.1;Solyc07g065500.2.1;…
GO:0016180	snRNA processing	BIOLOGICAL_PROCESS	0.0444166	0.000817768	1114	4	10	34694	Solyc02g064590.2.1;Solyc08g066700.3.1;Solyc03g097460.3.1;Solyc02g064620.2.1
GO:0071470	cellular response to osmotic stress	BIOLOGICAL_PROCESS	0.0444166	0.000817768	1114	4	10	34694	Solyc12g006700.3.1;Solyc12g160480.1.1;Solyc07g062700.3.1;Solyc08g081690.3.1
GO:0045454	cell redox homeostasis	BIOLOGICAL_PROCESS	0.0463518	0.000864131	1114	5	19	34694	Solyc05g053100.3.1;Solyc01g107860.3.1;Solyc02g093140.4.1;Solyc10g078920.4.1;Solyc02g064950.3.1
