# Supplementary material for: Ethylene Response Factor SlERF.D6 promotes ripening initiation and ethylene response through downstream transcription factors SlDEAR2 and SlTCP12
Source: Research Square preprint supplement (doi:10.21203/rs.3.rs-4018812/v1), 2024-03-25
Supplement: Supplementary file 10 [file Dataset_S6.xlsx]

## Sheet: Total Peaks
# Replicates	chr	start	end	score	name	closest_start_codon(distance to start codon)	Gene ID	Description
Replicates 1_1	SL4.0ch00	9189722	9189922	172.6	SL4.0ch00:9189822	-8565	Solyc00g500396.1.1	Unknown protein
Replicates 1_1	SL4.0ch00	3703729	3703929	199	SL4.0ch00:3703829	-336	Solyc00g500183.1.1	NADH dehydrogenase subunit 7 (AHRD V3.3 *-* A0A220T1K3_9ROSI)
Replicates 1_1	SL4.0ch04	57006857	57007057	101.8	SL4.0ch04:57006957	-11454	Solyc04g072039.1.1	Polyadenylate-binding protein (AHRD V3.3 *** A0A2G3CN64_CAPCH)
Replicates 1_1	SL4.0ch00	3731832	3732032	153.2	SL4.0ch00:3731932	-3547	Solyc00g023700.2.1	orf100 (mitochondrion) (AHRD V3.3 *** YP_005090391.1)
Replicates 1_1	SL4.0ch05	2821314	2821514	70.2	SL4.0ch05:2821414	-2212	Solyc05g008420.4.1	Repressor of RNA polymerase III transcription (AHRD V3.3 *** A0A1U8F9V8_CAPAN)
Replicates 1_1	SL4.0ch12	64593473	64593673	53.6	SL4.0ch12:64593573	-3115	Solyc12g095970.3.1	Late embryogenesis abundant (LEA) hydroxyproline-rich glycoprotein family (AHRD V3.3 *** A0A2U1MMJ0_ARTAN)
Replicates 1_1	SL4.0ch02	43018685	43018885	68	SL4.0ch02:43018785	-2194	Solyc02g080955.1.1	Pentatricopeptide repeat-containing protein (AHRD V3.3 *** A0A2G2XFX2_CAPBA)
Replicates 1_1	SL4.0ch05	64991076	64991276	64	SL4.0ch05:64991176	-8750	Solyc05g056270.3.1	Aspartate--tRNA ligase
Replicates 1_1	SL4.0ch00	3731683	3731883	150.8	SL4.0ch00:3731783	-3696	Solyc00g023700.2.1	orf100 (mitochondrion) (AHRD V3.3 *** YP_005090391.1)
Replicates 1_1	SL4.0ch02	52059596	52059796	62	SL4.0ch02:52059696	-17473	Solyc02g093040.4.1	tRNA-dihydrouridine synthase (AHRD V3.3 *** A0A2G3D8C2_CAPCH)
Replicates 1_1	SL4.0ch06	42257855	42258055	62	SL4.0ch06:42257955	-12290	Solyc06g072300.4.1	Homeobox-leucine zipper protein ROC8 (AHRD V3.3 *** A0A2G2V7B9_CAPBA)
Replicates 1_1	SL4.0ch00	9189827	9190027	122	SL4.0ch00:9189927	-8670	Solyc00g500396.1.1	Unknown protein
Replicates 1_1	SL4.0ch00	9189561	9189761	201.4	SL4.0ch00:9189661	-8404	Solyc00g500396.1.1	Unknown protein
Replicates 1_1	SL4.0ch00	591797	591997	98.4	SL4.0ch00:591897	-36223	Solyc00g500014.1.1	Unknown protein
Replicates 1_1	SL4.0ch08	9522234	9522434	112.1	SL4.0ch08:9522334	-47370	Solyc08g150111.1.1	Unknown protein
Replicates 1_1	SL4.0ch10	60148079	60148279	59.2	SL4.0ch10:60148179	-4117	Solyc10g079490.2.1	Inosine-5'-monophosphate dehydrogenase (AHRD V3.3 *** A0A2G2VW93_CAPBA)
Replicates 1_1	SL4.0ch03	64045520	64045720	56	SL4.0ch03:64045620	-1905	Solyc03g121530.3.1	WAS/WASL-interacting family protein (AHRD V3.3 *** AT1G55160.1)
Replicates 1_1	SL4.0ch05	1365551	1365751	52	SL4.0ch05:1365651	-6928	Solyc05g006640.4.1	bHLH transcription factor 036
Replicates 1_1	SL4.0ch04	59913858	59914058	47.5	SL4.0ch04:59913958	-13158	Solyc04g076960.4.1	Transcription factor (AHRD V3.3 *** A0A2U1NHT6_ARTAN)
Replicates 1_1	SL4.0ch08	718835	719035	63	SL4.0ch08:718935	-3628	Solyc08g005920.3.1	F-box/kelch-repeat protein SKIP25 (AHRD V3.3 *** A0A2G2XM52_CAPBA)
Replicates 1_1	SL4.0ch11	2918063	2918263	53	SL4.0ch11:2918163	-1868	Solyc11g008700.2.1	30S ribosomal protein S5 (AHRD V3.3 *** A0A1J3IX82_NOCCA)
Replicates 1_1	SL4.0ch02	33568730	33568930	52	SL4.0ch02:33568830	-7687	Solyc02g161140.1.1	Glycine-rich domain-containing protein 2 (AHRD V3.3 *** A0A2G3A574_CAPAN)
Replicates 1_1	SL4.0ch08	2649911	2650111	39.5	SL4.0ch08:2650011	-6238	Solyc08g008160.4.1	Calcium-dependent protein kinase (AHRD V3.3 *** B2KTA5_WHEAT)
Replicates 1_1	SL4.0ch00	1635427	1635627	102	SL4.0ch00:1635527	-46544	Solyc00g500088.2.1	Unknown protein
Replicates 1_1	SL4.0ch04	61796924	61797124	54	SL4.0ch04:61797024	-8295	Solyc04g079300.3.1	RNA-binding protein 47C (AHRD V3.3 *** A0A2U1PUZ3_ARTAN)
Replicates 1_1	SL4.0ch02	44629608	44629808	47	SL4.0ch02:44629708	-6162	Solyc02g083120.3.1	DUF641 domain-containing protein (AHRD V3.3 *** A0A1Q3C2N9_CEPFO)
Replicates 1_1	SL4.0ch01	5682961	5683161	52	SL4.0ch01:5683061	-27799	Solyc01g010660.3.1	NAD(P)-linked oxidoreductase superfamily protein (AHRD V3.3 *** Q949S6_ARATH)
Replicates 1_1	SL4.0ch05	2583400	2583600	51.2	SL4.0ch05:2583500	-1326	Solyc05g008120.4.1	Unknown protein
Replicates 1_1	SL4.0ch12	62678158	62678358	60	SL4.0ch12:62678258	-4674	Solyc12g056980.1.1	Unknown protein
Replicates 1_1	SL4.0ch00	9250886	9251086	70.8	SL4.0ch00:9250986	-2931	Solyc00g500402.1.1	Unknown protein
Replicates 1_1	SL4.0ch05	3087648	3087848	44	SL4.0ch05:3087748	-11188	Solyc05g008820.4.1	lipid phosphate phosphatase 2-like (AHRD V3.3 *** A0A1S4AJT8_TOBAC)
Replicates 1_1	SL4.0ch07	60721391	60721591	53	SL4.0ch07:60721491	-28795	Solyc07g052340.4.1	Unknown protein
Replicates 1_1	SL4.0ch12	64249857	64250057	52	SL4.0ch12:64249957	-2745	Solyc12g094570.1.1	inactive purple acid phosphatase-like protein (AHRD V3.3 *-* AT1G42430.1)
Replicates 1_1	SL4.0ch09	63108634	63108834	49	SL4.0ch09:63108734	-6489	Solyc09g075060.3.1	Beta-glucosidase 1 (AHRD V3.3 *** A0A1U8F8A5_CAPAN)
Replicates 1_1	SL4.0ch02	40673711	40673911	38.2	SL4.0ch02:40673811	-14265	Solyc02g077860.1.1	Ethylene-responsive transcription factor 4 (AHRD V3.3 *-* A0A2G3D5H4_CAPCH)
Replicates 1_1	SL4.0ch08	9450225	9450425	157	SL4.0ch08:9450325	-45339	Solyc08g016791.1.1	Unknown protein
Replicates 1_1	SL4.0ch00	9191492	9191692	90.6	SL4.0ch00:9191592	-10335	Solyc00g500396.1.1	Unknown protein
Replicates 1_1	SL4.0ch00	9192965	9193165	132.8	SL4.0ch00:9193065	-11808	Solyc00g500396.1.1	Unknown protein
Replicates 1_1	SL4.0ch08	9435152	9435352	80.9	SL4.0ch08:9435252	-9551	Solyc08g150109.1.1	Unknown protein
Replicates 1_1	SL4.0ch01	1611820	1612020	41.3	SL4.0ch01:1611920	-13419	Solyc01g007050.4.1	BEL1-like homeodomain protein 3 (AHRD V3.3 *** A0A2G3AY56_CAPCH)
Replicates 1_1	SL4.0ch09	63234371	63234571	51	SL4.0ch09:63234471	-2956	Solyc09g075290.3.1	Exocyst complex component (AHRD V3.3 *** A0A2G2W0K7_CAPBA)
Replicates 1_1	SL4.0ch00	1646443	1646643	69.6	SL4.0ch00:1646543	-57560	Solyc00g500088.2.1	Unknown protein
Replicates 1_1	SL4.0ch00	570681	570881	128	SL4.0ch00:570781	-18558	Solyc00g500013.1.1	Unknown protein
Replicates 1_1	SL4.0ch10	945103	945303	40.9	SL4.0ch10:945203	-2483	Solyc10g006460.3.1	COBRA-like protein 10 (AHRD V3.3 *** A0A2G3ATH9_CAPCH)
Replicates 1_1	SL4.0ch04	7832503	7832703	40	SL4.0ch04:7832603	-6793	Solyc04g017720.3.1	Zinc finger transcription factor 32
Replicates 1_1	SL4.0ch01	89942731	89942931	47	SL4.0ch01:89942831	-3186	Solyc01g111280.3.1	Cold-shock protein (AHRD V3.3 *-* A0A200RAC1_9MAGN)
Replicates 1_1	SL4.0ch01	80488112	80488312	44	SL4.0ch01:80488212	-6448	Solyc01g097320.3.1	Light-inducible protein CPRF2 (AHRD V3.3 *** A0A2G2W7C8_CAPBA)
Replicates 1_1	SL4.0ch10	3707274	3707474	40	SL4.0ch10:3707374	-9486	Solyc10g011660.3.1	Auxin-responsive GH3 family protein (AHRD V3.3 *** A0A2U1NZC8_ARTAN)
Replicates 1_1	SL4.0ch04	5351175	5351375	46	SL4.0ch04:5351275	-18561	Solyc04g015160.3.1	Phosphoglycolate phosphatase (AHRD V3.3 *** A0A2G3CDP2_CAPCH)
Replicates 1_1	SL4.0ch08	60769911	60770111	42.4	SL4.0ch08:60770011	-10111	Solyc08g078990.3.1	C2H2-like zinc finger protein (AHRD V3.3 *-* A0A2U1KP34_ARTAN)
Replicates 1_1	SL4.0ch01	1368260	1368460	31.1	SL4.0ch01:1368360	-461	Solyc01g006780.4.1	Unknown protein
Replicates 1_1	SL4.0ch12	63382863	63383063	45	SL4.0ch12:63382963	-9107	Solyc12g088420.2.1	C5orf35 (AHRD V3.3 *** AT5G23200.1)
Replicates 1_1	SL4.0ch04	1137302	1137502	42	SL4.0ch04:1137402	-1971	Solyc04g007430.2.1	bHLH transcription factor 031
Replicates 1_1	SL4.0ch00	4715213	4715413	85.2	SL4.0ch00:4715313	-3161	Solyc00g500233.1.1	Unknown protein
Replicates 1_1	SL4.0ch05	61335899	61336099	33	SL4.0ch05:61335999	-12682	Solyc05g051580.3.1	Mitochondrial substrate carrier family protein (AHRD V3.11 *** tr|A0A1P8BDA7|A0A1P8BDA7_ARATH)
Replicates 1_1	SL4.0ch01	74214918	74215118	47	SL4.0ch01:74215018	-9865	Solyc01g087030.3.1	Photosystem II PsbP (AHRD V3.3 *** A0A200Q959_9MAGN)
Replicates 1_1	SL4.0ch05	65171382	65171582	52	SL4.0ch05:65171482	-11797	Solyc05g056490.4.1	S-adenosyl-L-methionine-dependent methyltransferases superfamily protein (AHRD V3.11 *** tr|A0A2U1MCW0|A0A2U1MCW0_ARTAN)
Replicates 1_1	SL4.0ch10	63165359	63165559	38	SL4.0ch10:63165459	-1541	Solyc10g084500.1.1	hypothetical protein (AHRD V3.3 *** AT5G02640.1)
Replicates 1_1	SL4.0ch09	66286001	66286201	37.4	SL4.0ch09:66286101	-8690	Solyc09g090770.2.1	Major facilitator superfamily protein (AHRD V3.3 *** A0A2U1PVI2_ARTAN)
Replicates 1_1	SL4.0ch02	43347910	43348110	41	SL4.0ch02:43348010	-4000	Solyc02g081370.2.1	AMP-dependent synthetase/ligase (AHRD V3.3 *** A0A200PYF6_9MAGN)
Replicates 1_1	SL4.0ch07	65875667	65875867	41	SL4.0ch07:65875767	-1896	Solyc07g063610.5.1	Membrane lipoprotein lipid attachment site-like protein
Replicates 1_1	SL4.0ch00	5079308	5079508	116	SL4.0ch00:5079408	-5744	Solyc00g019970.2.1	NADH dehydrogenase subunit 9 (AHRD V3.11 *** tr|A0A290WKX8|A0A290WKX8_SOLLC)
Replicates 1_1	SL4.0ch03	57140354	57140554	37	SL4.0ch03:57140454	-13453	Solyc03g112230.4.1	Unknown protein
Replicates 1_1	SL4.0ch12	2328932	2329132	36.7	SL4.0ch12:2329032	-5351	Solyc12g008980.3.1	O-acyltransferase (AHRD V3.3 *** A0A2G2X3X8_CAPBA)
Replicates 1_1	SL4.0ch08	60106145	60106345	39.3	SL4.0ch08:60106245	-12043	Solyc08g078160.3.1	Ethylene-responsive transcription factor 2 (AHRD V3.3 *** A0A2G3DC56_CAPCH)
Replicates 1_1	SL4.0ch00	6805070	6805270	69	SL4.0ch00:6805170	-57891	Solyc00g500290.2.1	Unknown protein
Replicates 1_1	SL4.0ch00	592061	592261	78.9	SL4.0ch00:592161	-35959	Solyc00g500014.1.1	Unknown protein
Replicates 1_1	SL4.0ch00	5067171	5067371	163.7	SL4.0ch00:5067271	-699	Solyc00g020020.2.1	Unknown protein
Replicates 1_1	SL4.0ch08	1672745	1672945	41.4	SL4.0ch08:1672845	-5624	Solyc08g007110.4.1	Haloacid dehalogenase-like hydrolase (HAD) superfamily protein (AHRD V3.3 *** A0A2U1KV95_ARTAN)
Replicates 1_1	SL4.0ch00	1646128	1646328	66.2	SL4.0ch00:1646228	-57245	Solyc00g500088.2.1	Unknown protein
Replicates 1_1	SL4.0ch06	44106054	44106254	39	SL4.0ch06:44106154	-1114	Solyc06g074940.5.1	heavy metal-associated isoprenylated plant protein 3-like (AHRD V3.11 *** tr|A0A1U8H726|A0A1U8H726_CAPAN)
Replicates 1_1	SL4.0ch07	61044607	61044807	39	SL4.0ch07:61044707	-7919	Solyc07g052690.4.1	lysine-rich arabinogalactan protein 19 (AHRD V3.3 *-* XP_010324089.1)
Replicates 1_1	SL4.0ch07	63285805	63286005	47	SL4.0ch07:63285905	-12386	Solyc07g055300.3.1	WRKY transcription factor 78
Replicates 1_1	SL4.0ch05	2178706	2178906	46.7	SL4.0ch05:2178806	-113	Solyc05g007590.5.1	Aminotransferase
Replicates 1_1	SL4.0ch05	2256848	2257048	54	SL4.0ch05:2256948	-41	Solyc05g007740.3.1	Pentatricopeptide repeat-containing protein (AHRD V3.3 *** A0A2G3B7P9_CAPCH)
Replicates 1_1	SL4.0ch07	61680721	61680921	31.6	SL4.0ch07:61680821	-12849	Solyc07g053290.3.1	Ketol-acid reductoisomerase (AHRD V3.3 *** K4CFM5_SOLLC)
Replicates 1_1	SL4.0ch07	860048	860248	41	SL4.0ch07:860148	-17682	Solyc07g006050.4.1	Tetratricopeptide repeat (TPR)-like superfamily protein (AHRD V3.3 *** A0A2U1MFU8_ARTAN)
Replicates 1_1	SL4.0ch09	1627249	1627449	38	SL4.0ch09:1627349	-404	Solyc09g008130.3.1	Membrane magnesium transporter (AHRD V3.3 *** A0A1U8EHI1_CAPAN)
Replicates 1_1	SL4.0ch03	9466457	9466657	53	SL4.0ch03:9466557	-2704	Solyc03g044600.2.1	transmembrane protein%2C putative (DUF1279) (AHRD V3.3 *** AT2G20940.2)
Replicates 1_1	SL4.0ch01	1611603	1611803	28.7	SL4.0ch01:1611703	-13202	Solyc01g007050.4.1	BEL1-like homeodomain protein 3 (AHRD V3.3 *** A0A2G3AY56_CAPCH)
Replicates 1_1	SL4.0ch05	56536082	56536282	40	SL4.0ch05:56536182	-2168	Solyc05g044630.3.1	Unknown protein
Replicates 1_1	SL4.0ch04	57173349	57173549	39.9	SL4.0ch04:57173449	-7057	Solyc04g072240.3.1	Protein kinase superfamily protein (AHRD V3.3 *** A0A2U1PVM4_ARTAN)
Replicates 1_1	SL4.0ch01	73901065	73901265	45	SL4.0ch01:73901165	-4954	Solyc01g086700.4.1	Sister chromatid cohesion 1 protein 4 (AHRD V3.3 *** A0A2G3DGK5_CAPCH)
Replicates 1_1	SL4.0ch10	55574817	55575017	45	SL4.0ch10:55574917	-10808	Solyc10g055230.1.1	Cold-shock protein (AHRD V3.3 *-* A0A200RAC1_9MAGN)
Replicates 1_1	SL4.0ch09	2922580	2922780	34	SL4.0ch09:2922680	-3111	Solyc09g009430.3.1	Iron-sulfur assembly protein IscA-like 1
Replicates 1_1	SL4.0ch06	38288600	38288800	33.9	SL4.0ch06:38288700	-16798	Solyc06g065160.1.1	TCP transcription factor 13
Replicates 1_1	SL4.0ch05	485009	485209	48.4	SL4.0ch05:485109	-1593	Solyc05g005630.4.1	RNA-binding protein 25-like (AHRD V3.3 *** A0A2K3LLK7_TRIPR)
Replicates 1_1	SL4.0ch00	574629	574829	72.1	SL4.0ch00:574729	-14610	Solyc00g500013.1.1	Unknown protein
Replicates 1_1	SL4.0ch00	4728757	4728957	107	SL4.0ch00:4728857	-79387	Solyc00g160460.1.1	Unknown protein
Replicates 1_1	SL4.0ch06	47061019	47061219	38.2	SL4.0ch06:47061119	-621	Solyc06g084325.1.1	EID1-like F-box protein 3 (AHRD V3.3 *** A0A2G2ZF18_CAPAN)
Replicates 1_1	SL4.0ch00	9122513	9122713	69	SL4.0ch00:9122613	-10290	Solyc00g500389.1.1	Unknown protein
Replicates 1_1	SL4.0ch10	51040287	51040487	36	SL4.0ch10:51040387	-17540	Solyc10g051370.3.1	RNA-binding protein (AHRD V3.3 *-* O24106_NICGU)
Replicates 1_1	SL4.0ch00	594369	594569	60.5	SL4.0ch00:594469	-33651	Solyc00g500014.1.1	Unknown protein
Replicates 1_1	SL4.0ch06	20055858	20056058	46	SL4.0ch06:20055958	-212265	Solyc06g160530.1.1	Unknown protein
Replicates 1_1	SL4.0ch08	9515172	9515372	192	SL4.0ch08:9515272	-464	Solyc08g016796.1.1	Unknown protein
Replicates 1_1	SL4.0ch01	88906112	88906312	41	SL4.0ch01:88906212	-9139	Solyc01g109670.3.1	meloidogyne-induced giant cell protein DB275
Replicates 1_1	SL4.0ch04	2409231	2409431	41	SL4.0ch04:2409331	-3400	Solyc04g008720.4.1	Arginine/serine-rich-like splicing factor (AHRD V3.3 *-* Q9SII4_ARATH)
Replicates 1_1	SL4.0ch10	51080348	51080548	41	SL4.0ch10:51080448	-57601	Solyc10g051370.3.1	RNA-binding protein (AHRD V3.3 *** O24106_NICGU)
Replicates 1_1	SL4.0ch06	38249128	38249328	43	SL4.0ch06:38249228	-11957	Solyc06g065073.1.1	R2R3MYB transcription factor 3
Replicates 1_1	SL4.0ch10	59439209	59439409	43	SL4.0ch10:59439309	-15079	Solyc10g078540.3.1	Patatin (AHRD V3.3 *** A0A2G3BI67_CAPCH)
Replicates 1_1	SL4.0ch03	58100601	58100801	25	SL4.0ch03:58100701	-627	Solyc03g113590.3.1	5-formyltetrahydrofolate cycloligase
Replicates 1_1	SL4.0ch08	58250047	58250247	35	SL4.0ch08:58250147	-5808	Solyc08g076080.3.1	DUF760 domain-containing protein (AHRD V3.3 *** A0A1Q3CP94_CEPFO)
Replicates 1_1	SL4.0ch10	57410898	57411098	35	SL4.0ch10:57410998	-79409	Solyc10g074690.2.1	Calcium-binding protein CAST (AHRD V3.3 *** A0A1U8EHD5_CAPAN)
Replicates 1_1	SL4.0ch12	65812555	65812755	35	SL4.0ch12:65812655	-8287	Solyc12g098950.2.1	Guanosine-3'5'-bis(Diphosphate) 3'-pyrophosphohydrolase (AHRD V3.3 *** E5GC47_CUCME)
Replicates 1_1	SL4.0ch04	59289899	59290099	45	SL4.0ch04:59289999	-8028	Solyc04g076380.4.1	Cysteine--tRNA ligase (AHRD V3.3 *** A0A1J3GNV7_NOCCA)
Replicates 1_1	SL4.0ch01	208957	209157	40	SL4.0ch01:209057	-684	Solyc01g005253.1.1	Aspartate-semialdehyde dehydrogenase (AHRD V3.11 *** tr|A0A2G3AYJ3|A0A2G3AYJ3_CAPCH)
Replicates 1_1	SL4.0ch12	66436102	66436302	40	SL4.0ch12:66436202	-4567	Solyc12g099950.3.1	SNF1 kinase complex anchoring protein
Replicates 1_1	SL4.0ch08	9491529	9491729	108	SL4.0ch08:9491629	-10355	Solyc08g016794.1.1	Unknown protein
Replicates 1_1	SL4.0ch07	66611379	66611579	47	SL4.0ch07:66611479	-2737	Solyc07g064800.3.1	Threonine--tRNA ligase
Replicates 1_1	SL4.0ch08	9504532	9504732	129.4	SL4.0ch08:9504632	-3308	Solyc08g150110.1.1	Unknown protein
Replicates 1_1	SL4.0ch08	9477070	9477270	64.5	SL4.0ch08:9477170	-24814	Solyc08g016794.1.1	Unknown protein
Replicates 1_1	SL4.0ch05	2821522	2821722	41.8	SL4.0ch05:2821622	-2004	Solyc05g008420.4.1	Repressor of RNA polymerase III transcription (AHRD V3.3 *** A0A1U8F9V8_CAPAN)
Replicates 1_1	SL4.0ch00	9354638	9354838	57	SL4.0ch00:9354738	-147373	Solyc00g500397.1.1	Unknown protein
Replicates 1_1	SL4.0ch08	9415665	9415865	92.5	SL4.0ch08:9415765	-10779	Solyc08g016791.1.1	Unknown protein
Replicates 1_1	SL4.0ch05	4221408	4221608	27.3	SL4.0ch05:4221508	-6712	Solyc05g009950.3.1	TauD/TfdA-like domain-containing protein (AHRD V3.3 *** A0A2U1PT45_ARTAN)
Replicates 1_1	SL4.0ch01	87099099	87099299	43.8	SL4.0ch01:87099199	-16186	Solyc01g107180.3.1	Zinc finger protein (AHRD V3.3 *** A0T3Q5_SOLTU)
Replicates 1_1	SL4.0ch05	2255779	2255979	33.7	SL4.0ch05:2255879	-1110	Solyc05g007740.3.1	Mitochondrial carrier protein (AHRD V3.3 *** A0A200QP40_9MAGN)
Replicates 1_1	SL4.0ch02	33632644	33632844	30.2	SL4.0ch02:33632744	-8710	Solyc02g063520.4.1	hypothetical protein (AHRD V3.3 *-* AT5G67020.1)
Replicates 1_1	SL4.0ch00	6985055	6985255	46	SL4.0ch00:6985155	-2703	Solyc00g500306.1.1	Unknown protein
Replicates 1_1	SL4.0ch04	4013533	4013733	38.8	SL4.0ch04:4013633	-2098	Solyc04g011550.2.1	pheromone-processing carboxypeptidase KEX1-like (AHRD V3.3 --* XP_022740211.1)
Replicates 1_1	SL4.0ch04	58631466	58631666	25	SL4.0ch04:58631566	-32813	Solyc04g074710.3.1	Blue copper protein (AHRD V3.11 *** tr|A0A2G2ZQN6|A0A2G2ZQN6_CAPAN)
Replicates 1_1	SL4.0ch10	1494600	1494800	36	SL4.0ch10:1494700	-193	Solyc10g007160.2.1	transcription factor GTE4-like (AHRD V3.3 *-* XP_022985931.1)
Replicates 1_1	SL4.0ch01	86336380	86336580	30	SL4.0ch01:86336480	-7571	Solyc01g106040.3.1	GATA transcription factor 28 (AHRD V3.3 *** A0A2G3AWS2_CAPCH)
Replicates 1_1	SL4.0ch04	63887550	63887750	30	SL4.0ch04:63887650	-11081	Solyc04g082150.1.1	Pseudouridine synthase family protein (AHRD V3.11 *** tr|A0A2U1N9V5|A0A2U1N9V5_ARTAN)
Replicates 1_1	SL4.0ch08	58244150	58244350	30	SL4.0ch08:58244250	-17618	Solyc08g076120.3.1	Xyloglucan endotransglucosylase/hydrolase (AHRD V3.3 *** A0A2G3DCR6_CAPCH)
Replicates 1_1	SL4.0ch05	4221223	4221423	37.4	SL4.0ch05:4221323	-6527	Solyc05g009950.3.1	TauD/TfdA-like domain-containing protein (AHRD V3.3 *** A0A2U1PT45_ARTAN)
Replicates 1_1	SL4.0ch00	8474250	8474450	46.1	SL4.0ch00:8474350	-2050	Solyc00g500368.1.1	Unknown protein
Replicates 1_1	SL4.0ch00	9140395	9140595	48	SL4.0ch00:9140495	-2334	Solyc00g500391.1.1	Unknown protein
Replicates 1_1	SL4.0ch04	2219979	2220179	35	SL4.0ch04:2220079	-4830	Solyc04g008590.3.1	Ankyrin repeat (AHRD V3.3 *** A0A200R764_9MAGN)
Replicates 1_1	SL4.0ch08	1702639	1702839	42	SL4.0ch08:1702739	-5238	Solyc08g007130.5.1	SBP (S-ribonuclease binding protein) family protein (AHRD V3.3 *** Q8LCK5_ARATH)
Replicates 1_1	SL4.0ch08	63818059	63818259	42	SL4.0ch08:63818159	-4522	Solyc08g083120.3.1	Methionine gamma-lyase (AHRD V3.3 *** A0A1U8G8Y5_CAPAN)
Replicates 1_1	SL4.0ch08	9428643	9428843	73	SL4.0ch08:9428743	-16060	Solyc08g150109.1.1	Unknown protein
Replicates 1_1	SL4.0ch09	65942397	65942597	44	SL4.0ch09:65942497	-1003	Solyc09g090330.3.1	Transducin/WD40 repeat-like superfamily protein (AHRD V3.3 *** AT4G14310.1)
Replicates 1_1	SL4.0ch09	66796130	66796330	37	SL4.0ch09:66796230	-1409	Solyc09g091410.2.1	Inosine triphosphate pyrophosphatase (AHRD V3.3 *** A0A2G2W1Y2_CAPBA)
Replicates 1_1	SL4.0ch01	2338902	2339102	29	SL4.0ch01:2339002	-4952	Solyc01g008290.3.1	Prefoldin subunit 5 (AHRD V3.3 *** B6TVU2_MAIZE)
Replicates 1_1	SL4.0ch08	2649761	2649961	28.5	SL4.0ch08:2649861	-6088	Solyc08g008160.4.1	Calcium-dependent protein kinase (AHRD V3.3 *** B2KTA5_WHEAT)
Replicates 1_1	SL4.0ch01	77426883	77427083	28.5	SL4.0ch01:77426983	-4540	Solyc01g091580.3.1	BON1-associated protein 2-like (AHRD V3.11 *** tr|A0A2I4E3A5|A0A2I4E3A5_9ROSI)
Replicates 1_1	SL4.0ch11	52942837	52943037	28.4	SL4.0ch11:52942937	-2216	Solyc11g071360.1.1	Pentatricopeptide repeat (AHRD V3.3 *** A0A200QJM0_9MAGN)
Replicates 1_1	SL4.0ch03	63866692	63866892	38.5	SL4.0ch03:63866792	-2259	Solyc03g121270.3.1	23S rRNA (Uracil-5-)-methyltransferase rumA (AHRD V3.3 *** A0A2K3PEV5_TRIPR)
Replicates 1_1	SL4.0ch00	4731078	4731278	93	SL4.0ch00:4731178	-81708	Solyc00g160460.1.1	Unknown protein
Replicates 1_1	SL4.0ch04	57561353	57561553	34	SL4.0ch04:57561453	-10204	Solyc04g072640.3.1	structural constituent of ribosome (AHRD V3.3 *-* AT1G22110.3)
Replicates 1_1	SL4.0ch10	88800	89000	34	SL4.0ch10:88900	-2217	Solyc10g005280.1.1	RNA-binding protein (AHRD V3.3 *** A0A2K3PBB6_TRIPR)
Replicates 1_1	SL4.0ch10	272610	272810	33.1	SL4.0ch10:272710	-28323	Solyc10g005480.3.1	Protein strawberry notch (AHRD V3.3 *** A0A2G3BCB2_CAPCH)
Replicates 1_1	SL4.0ch09	63618537	63618737	47	SL4.0ch09:63618637	-1198	Solyc09g075790.3.1	long chain acyl-CoA synthetase 6
Replicates 1_1	SL4.0ch07	2536822	2537022	30.7	SL4.0ch07:2536922	-10216	Solyc07g007880.1.1	CCR4-NOT transcription complex subunit 10-like (AHRD V3.3 *** A0A2I4EMI0_9ROSI)
Replicates 1_1	SL4.0ch11	48976332	48976532	30.6	SL4.0ch11:48976432	-12854	Solyc11g065480.3.1	protein RETICULATA-RELATED 4
Replicates 1_1	SL4.0ch01	74789402	74789602	30.5	SL4.0ch01:74789502	-8544	Solyc01g087600.3.1	Polyamine oxidase (AHRD V3.3 *** Q4H439_TOBAC)
Replicates 1_1	SL4.0ch10	61992714	61992914	30.4	SL4.0ch10:61992814	-6768	Solyc10g081980.2.1	Late embryogenesis abundant (LEA) hydroxyproline-rich glycoprotein family (AHRD V3.11 *** tr|Q9SVC8|Q9SVC8_ARATH)
Replicates 1_1	SL4.0ch04	61310205	61310405	28	SL4.0ch04:61310305	-3954	Solyc04g078640.3.1	Ethylene-responsive transcription factor RAP2-1 (AHRD V3.3 *** A0A1U8GBU2_CAPAN)
Replicates 1_1	SL4.0ch11	605815	606015	28	SL4.0ch11:605915	-3556	Solyc11g005740.2.1	Pectinesterase (AHRD V3.3 *** A0A2I4GT13_9ROSI)
Replicates 1_1	SL4.0ch04	57007023	57007223	33.2	SL4.0ch04:57007123	-11620	Solyc04g072039.1.1	Polyadenylate-binding protein (AHRD V3.3 *** A0A2G3CN64_CAPCH)
Replicates 1_1	SL4.0ch10	60147868	60148068	37.8	SL4.0ch10:60147968	-3906	Solyc10g079490.2.1	Inosine-5'-monophosphate dehydrogenase (AHRD V3.3 *** A0A2G2VW93_CAPBA)
Replicates 1_1	SL4.0ch08	9429904	9430104	77	SL4.0ch08:9430004	-14799	Solyc08g150109.1.1	Unknown protein
Replicates 1_1	SL4.0ch07	58982296	58982496	33	SL4.0ch07:58982396	-3630	Solyc07g047860.4.1	Unknown protein
Replicates 1_1	SL4.0ch10	59689165	59689365	33	SL4.0ch10:59689265	-8471	Solyc10g078940.2.1	Activator of 90 kDa heat shock protein ATPase-like protein 1 (AHRD V3.3 *** A0A1J3GDI7_NOCCA)
Replicates 1_1	SL4.0ch05	23614281	23614481	32.6	SL4.0ch05:23614381	-329256	Solyc05g018810.5.1	RING/U-box superfamily protein (AHRD V3.3 *-* Q3EAE6_ARATH)
Replicates 1_1	SL4.0ch07	2536989	2537189	32.3	SL4.0ch07:2537089	-10383	Solyc07g007880.1.1	CCR4-NOT transcription complex subunit 10-like (AHRD V3.3 *** A0A2I4EMI0_9ROSI)
Replicates 1_1	SL4.0ch04	60358408	60358608	32.2	SL4.0ch04:60358508	-13413	Solyc04g077440.4.1	Amino acid transporter (AHRD V3.3 *** A0A200PPZ9_9MAGN)
Replicates 1_1	SL4.0ch00	732636	732836	32	SL4.0ch00:732736	-167279	Solyc02g010630.2.1	Unknown protein
Replicates 1_1	SL4.0ch00	6849153	6849353	97	SL4.0ch00:6849253	-13808	Solyc00g500290.2.1	Unknown protein
Replicates 1_1	SL4.0ch00	9192488	9192688	96.7	SL4.0ch00:9192588	-11331	Solyc00g500396.1.1	Unknown protein
Replicates 1_1	SL4.0ch01	75489384	75489584	35	SL4.0ch01:75489484	-2992	Solyc01g088440.2.1	RING/U-box superfamily protein (AHRD V3.11 *-* tr|A0A2U1KCN8|A0A2U1KCN8_ARTAN)
Replicates 1_1	SL4.0ch11	53296005	53296205	34.7	SL4.0ch11:53296105	-2551	Solyc11g071890.3.1	GTPase LSG1-2 (AHRD V3.3 *** A0A2G3BAP2_CAPCH)
Replicates 1_1	SL4.0ch07	2075883	2076083	29.2	SL4.0ch07:2075983	-2706	Solyc07g007370.3.1	Ubiquitin-associated (UBA)/TS-N domain-containing protein (AHRD V3.3 *** A0A2U1MD44_ARTAN)
Replicates 1_1	SL4.0ch01	2307490	2307690	37	SL4.0ch01:2307590	-5273	Solyc01g008220.3.1	TCP transcription factor 15 (AHRD V3.11 *** tr|G3BGV5|G3BGV5_SOLLC)
Replicates 1_1	SL4.0ch03	46857230	46857430	32	SL4.0ch03:46857330	-1491	Solyc03g082340.1.1	Avr9/Cf-9 rapidly elicited protein 65 (AHRD V3.3 *** Q9FQZ0_TOBAC)
Replicates 1_1	SL4.0ch04	61896394	61896594	32	SL4.0ch04:61896494	-4193	Solyc04g079400.3.1	Protein OSB1
Replicates 1_1	SL4.0ch12	2519065	2519265	31.9	SL4.0ch12:2519165	-8529	Solyc12g009170.2.1	Inter-alpha-trypsin inhibitor heavy chain-like protein (AHRD V3.3 *** Q8L798_ARATH)
Replicates 1_1	SL4.0ch08	60441725	60441925	31.4	SL4.0ch08:60441825	-12910	Solyc08g078550.1.1	O-fucosyltransferase (AHRD V3.3 *** A0A2P5AVU2_PARAD)
Replicates 1_1	SL4.0ch02	45972059	45972259	31.1	SL4.0ch02:45972159	-4973	Solyc02g084890.3.1	P-loop containing nucleoside triphosphate hydrolases superfamily protein (AHRD V3.3 *** A0A2U1NGS8_ARTAN)
Replicates 1_1	SL4.0ch09	5117922	5118122	34	SL4.0ch09:5118022	-9532	Solyc09g011770.3.1	R2R3MYB transcription factor 1
Replicates 1_1	SL4.0ch10	1501995	1502195	36	SL4.0ch10:1502095	-103	Solyc10g007170.2.1	transcription factor GTE4-like (AHRD V3.3 *-* A0A1U7YX65_NICSY)
Replicates 1_1	SL4.0ch00	1624585	1624785	65.4	SL4.0ch00:1624685	-35702	Solyc00g500088.2.1	Unknown protein
Replicates 1_1	SL4.0ch03	62913499	62913699	22.6	SL4.0ch03:62913599	-2578	Solyc03g119940.3.1	Molybdate transporter like (AHRD V3.3 *** A0A2R6PTH4_ACTCH)
Replicates 1_1	SL4.0ch04	62253074	62253274	25.9	SL4.0ch04:62253174	-5299	Solyc04g079970.3.1	geranylgeranyl pyrophosphate synthase 2
Replicates 1_1	SL4.0ch05	36417128	36417328	38	SL4.0ch05:36417228	-177105	Solyc05g025730.3.1	SH3 domain protein (AHRD V3.3 *** A0A2K3ME66_TRIPR)
Replicates 1_1	SL4.0ch04	56980883	56981083	37.3	SL4.0ch04:56980983	-18463	Solyc04g072040.1.1	LRR receptor-like kinase (AHRD V3.3 *** A0A072VNN3_MEDTR)
Replicates 1_1	SL4.0ch10	60432998	60433198	40	SL4.0ch10:60433098	-26089	Solyc10g079870.3.1	Peptide chain release factor 2-like protein (AHRD V3.3 *** A0A2K3N7D8_TRIPR)
Replicates 1_1	SL4.0ch00	9308677	9308877	52	SL4.0ch00:9308777	-101412	Solyc00g500397.1.1	Unknown protein
Replicates 1_1	SL4.0ch00	9250727	9250927	56.2	SL4.0ch00:9250827	-3090	Solyc00g500402.1.1	Unknown protein
Replicates 1_1	SL4.0ch06	1199590	1199790	31	SL4.0ch06:1199690	-793	Solyc06g007130.5.1.1	omega-3 fatty acid desaturase -3
Replicates 1_1	SL4.0ch00	6104938	6105138	67	SL4.0ch00:6105038	-45241	Solyc00g500267.1.1	Unknown protein
Replicates 1_1	SL4.0ch01	74789263	74789463	32.1	SL4.0ch01:74789363	-8683	Solyc01g087600.3.1	Polyamine oxidase (AHRD V3.3 *** Q4H439_TOBAC)
Replicates 1_1	SL4.0ch06	28858082	28858282	32.1	SL4.0ch06:28858182	-6654	Solyc06g048510.5.1	WD-40 repeat containing protein (AHRD V3.11 *** tr|A0A0K0XR03|A0A0K0XR03_TOBAC)
Replicates 1_1	SL4.0ch06	31911840	31912040	28	SL4.0ch06:31911940	-291	Solyc06g051040.5.1	Mitotic checkpoint serine/threonine-protein kinase BUB1-like protein (AHRD V3.11 *-* tr|A0A2K3L1J0|A0A2K3L1J0_TRIPR)
Replicates 1_1	SL4.0ch00	536327	536527	27.3	SL4.0ch00:536427	-8267	Solyc00g500010.1.1	Unknown protein
Replicates 1_1	SL4.0ch00	9139551	9139751	39.4	SL4.0ch00:9139651	-1490	Solyc00g500391.1.1	Unknown protein
Replicates 1_1	SL4.0ch02	48653120	48653320	27	SL4.0ch02:48653220	-14515	Solyc02g088530.1.1	Ubiquitin conjugation factor E4 (AHRD V3.3 *-* R4XJD8_TAPDE)
Replicates 1_1	SL4.0ch00	2638539	2638739	49	SL4.0ch00:2638639	-58856	Solyc00g500158.1.1	Cytochrome b6-f complex subunit 4 (AHRD V3.3 *** A0A2G2XBM1_CAPBA)
Replicates 1_1	SL4.0ch04	62252801	62253001	34.5	SL4.0ch04:62252901	-5572	Solyc04g079970.3.1	geranylgeranyl pyrophosphate synthase 2
Replicates 1_1	SL4.0ch04	61011326	61011526	34.3	SL4.0ch04:61011426	-4887	Solyc04g078240.3.1	metal transporter Nramp2
Replicates 1_1	SL4.0ch00	4705193	4705393	76	SL4.0ch00:4705293	-13181	Solyc00g500233.1.1	Unknown protein
Replicates 1_1	SL4.0ch01	81060878	81061078	39	SL4.0ch01:81060978	-3498	Solyc01g098230.3.1	transmembrane protein adipocyte-associated 1-like (AHRD V3.3 *** A0A2I4GNC8_9ROSI)
Replicates 1_1	SL4.0ch03	47858760	47858960	39	SL4.0ch03:47858860	-11041	Solyc03g083420.4.1	Histone-lysine N-methyltransferase (AHRD V3.3 *** A0A2G2ZZR3_CAPAN)
Replicates 1_1	SL4.0ch11	52844913	52845113	25	SL4.0ch11:52845013	-4139	Solyc11g071230.2.1	U-box domain-containing protein 26 (AHRD V3.3 *** A0A1J3FUP2_NOCCA)
Replicates 1_1	SL4.0ch07	10869945	10870145	28	SL4.0ch07:10870045	-120650	Solyc07g018433.1.1	Unknown protein
Replicates 1_1	SL4.0ch01	71887857	71888057	30	SL4.0ch01:71887957	-17926	Solyc01g080150.3.1	UPF0613 protein PB24D3.06c (AHRD V3.3 *** A0A1J3GSX0_NOCCA)
Replicates 1_1	SL4.0ch11	3444630	3444830	30	SL4.0ch11:3444730	-8094	Solyc11g010350.2.1	bHLH transcription factor 069
Replicates 1_1	SL4.0ch04	55378512	55378712	29.1	SL4.0ch04:55378612	-2822	Solyc04g064870.3.1	MADS-box transcription factor 23 (AHRD V3.3 *** A0A2G2Y5S9_CAPAN)
Replicates 1_1	SL4.0ch02	51520502	51520702	32	SL4.0ch02:51520602	-6265	Solyc02g092430.1.1	Phototropic-responsive NPH3 family protein (AHRD V3.3 *-* A0A2U1NGE5_ARTAN)
Replicates 1_1	SL4.0ch03	3699383	3699583	32	SL4.0ch03:3699483	-2866	Solyc03g026280.3.1	CRT binding factor 3 (AHRD V3.3 *** B3TPP7_SOLPI)
Replicates 1_1	SL4.0ch12	63020504	63020704	32	SL4.0ch12:63020604	-7047	Solyc12g087960.2.1	AT-hook motif nuclear-localized protein (AHRD V3.3 *** A0A1U8GD78_CAPAN)
Replicates 1_1	SL4.0ch00	1597235	1597435	34	SL4.0ch00:1597335	-8352	Solyc00g500088.2.1	Unknown protein
Replicates 1_1	SL4.0ch03	4402327	4402527	34	SL4.0ch03:4402427	-15950	Solyc03g031990.4.1	3-hydroxy-3-methylglutaryl-coenzyme A reductase 3 (AHRD V3.11 *** sp|Q41438|HMDH3_SOLTU)
Replicates 1_1	SL4.0ch09	57705927	57706127	34	SL4.0ch09:57706027	-35540	Solyc09g064380.3.1	hypothetical protein (AHRD V3.3 *-* AT4G28690.2)
Replicates 1_1	SL4.0ch07	60298402	60298602	27	SL4.0ch07:60298502	-3612	Solyc07g051850.3.1	Unknown protein
Replicates 1_1	SL4.0ch07	65543565	65543765	27	SL4.0ch07:65543665	-57	Solyc07g063140.1.1	Glutamyl-tRNA(Gln) amidotransferase subunit C
Replicates 1_1	SL4.0ch09	3097329	3097529	27	SL4.0ch09:3097429	-3529	Solyc09g009660.3.1	Unknown protein
Replicates 1_1	SL4.0ch07	407615	407815	36	SL4.0ch07:407715	-12047	Solyc07g005520.1.1	Ubiquitin carboxyl-terminal hydrolase 23 (AHRD V3.3 *** A0A1U8HH33_CAPAN)
Replicates 1_1	SL4.0ch05	62045159	62045359	38	SL4.0ch05:62045259	-35491	Solyc05g052470.3.1	Abscisic acid receptor PYL6 (AHRD V3.3 *-* A0A1U8GQ86_CAPAN)
Replicates 1_1	SL4.0ch01	84738484	84738684	37.3	SL4.0ch01:84738584	-6134	Solyc01g103960.3.1	Bifunctional hydroxymethylpyrimidine kinase/phosphomethylpyrimidine kinase (AHRD V3.3 *** A0A2Z4MGS9_BREBE)
Replicates 1_1	SL4.0ch00	595535	595735	97	SL4.0ch00:595635	-32485	Solyc00g500014.1.1	Unknown protein
Replicates 1_1	SL4.0ch02	50010063	50010263	29	SL4.0ch02:50010163	-14451	Solyc02g090420.2.1	Myb family transcription factor (AHRD V3.3 *** A0A2I0WBC3_9ASPA)
Replicates 1_1	SL4.0ch03	62940224	62940424	29	SL4.0ch03:62940324	-595	Solyc03g119980.3.1	Alpha/beta-Hydrolases superfamily protein (AHRD V3.3 *** O04083_ARATH)
Replicates 1_1	SL4.0ch00	560580	560780	49	SL4.0ch00:560680	-28659	Solyc00g500013.1.1	Unknown protein
Replicates 1_1	SL4.0ch01	90704661	90704861	31	SL4.0ch01:90704761	-5243	Solyc01g112280.3.1	Glutamate--tRNA ligase
Replicates 1_1	SL4.0ch12	2572998	2573198	30.6	SL4.0ch12:2573098	-4093	Solyc12g009230.3.1	Ethylene-responsive transcription factor (AHRD V3.3 *-* A0A2G3BP26_CAPCH)
Replicates 1_1	SL4.0ch00	3392701	3392901	43	SL4.0ch00:3392801	-79064	Solyc00g500176.1.1	Unknown protein
Replicates 1_1	SL4.0ch00	8266471	8266671	32.7	SL4.0ch00:8266571	-105325	Solyc00g500365.1.1	1-deoxy-D-xylulose 5-phosphate reductoisomerase
Replicates 1_1	SL4.0ch12	64593608	64593808	32.4	SL4.0ch12:64593708	-3250	Solyc12g095970.3.1	Late embryogenesis abundant (LEA) hydroxyproline-rich glycoprotein family (AHRD V3.3 *** A0A2U1MMJ0_ARTAN)
Replicates 1_1	SL4.0ch00	2879886	2880086	62	SL4.0ch00:2879986	-47645	Solyc00g160360.1.1	Unknown protein
Replicates 1_1	SL4.0ch02	43933237	43933437	41	SL4.0ch02:43933337	-13581	Solyc02g082230.4.1	Thioredoxin reductase (AHRD V3.3 *** A0A2G3D6M1_CAPCH)
Replicates 1_1	SL4.0ch08	2498150	2498350	34.9	SL4.0ch08:2498250	-8574	Solyc08g007980.3.1	RNA-binding protein NOB1 (AHRD V3.3 *** A0A2K3NS65_TRIPR)
Replicates 1_1	SL4.0ch01	1295145	1295345	26	SL4.0ch01:1295245	-118	Solyc01g006710.4.1	Helicase (AHRD V3.3 *** A0A200PRN8_9MAGN)
Replicates 1_1	SL4.0ch03	61926725	61926925	26	SL4.0ch03:61926825	-5409	Solyc03g118620.3.1	transmembrane protein (AHRD V3.3 *** AT3G17950.1)
Replicates 1_1	SL4.0ch05	4270128	4270328	26	SL4.0ch05:4270228	-8209	Solyc05g010010.1.1	Nudix hydrolase 1 (AHRD V3.3 *** A0A2G3B6G9_CAPCH)
Replicates 1_1	SL4.0ch08	59811508	59811708	26	SL4.0ch08:59811608	-5264	Solyc08g077800.5.1	Peptidyl-prolyl cis-trans isomerase (AHRD V3.3 *** A0A2U1QI01_ARTAN)
Replicates 1_1	SL4.0ch11	2967050	2967250	25.1	SL4.0ch11:2967150	-10993	Solyc11g008740.2.1	Pentatricopeptide repeat-containing protein (AHRD V3.3 *** A0A2G2VE96_CAPBA)
Replicates 1_1	SL4.0ch02	37097663	37097863	37	SL4.0ch02:37097763	-3838	Solyc02g069130.3.1	zinc finger protein ZPR1-like (AHRD V3.3 *** A0A2I4F7X7_9ROSI)
Replicates 1_1	SL4.0ch00	1639323	1639523	68	SL4.0ch00:1639423	-50440	Solyc00g500088.2.1	Unknown protein
Replicates 1_1	SL4.0ch08	9521812	9522012	77.9	SL4.0ch08:9521912	-47792	Solyc08g150111.1.1	Unknown protein
Replicates 1_1	SL4.0ch00	9188000	9188200	71	SL4.0ch00:9188100	-6843	Solyc00g500396.1.1	Unknown protein
Replicates 1_1	SL4.0ch08	9535383	9535583	45.4	SL4.0ch08:9535483	-34221	Solyc08g150111.1.1	Unknown protein
Replicates 1_1	SL4.0ch06	40416814	40417014	28	SL4.0ch06:40416914	-25063	Solyc06g068990.4.1	Calcium-binding allergen Ole e 8 (AHRD V3.3 *** A0A2G2WLM3_CAPBA)
Replicates 1_1	SL4.0ch03	933147	933347	27.3	SL4.0ch03:933247	-3906	Solyc03g006320.1.1	Ethylene-responsive transcription factor 4 (AHRD V3.3 *-* A0A2G2VSG2_CAPBA)
Replicates 1_1	SL4.0ch10	944738	944938	27.1	SL4.0ch10:944838	-2848	Solyc10g006460.3.1	COBRA-like protein 10 (AHRD V3.3 *** A0A2G3ATH9_CAPCH)
Replicates 1_1	SL4.0ch01	77517908	77518108	27	SL4.0ch01:77518008	-17799	Solyc01g091660.3.1	S-adenosyl-L-methionine-dependent methyltransferases superfamily protein (AHRD V3.3 *** A0A2U1NM08_ARTAN)
Replicates 1_1	SL4.0ch04	62563010	62563210	23	SL4.0ch04:62563110	-4151	Solyc04g080410.4.1	plasma membrane fusion protein Chr5
Replicates 1_1	SL4.0ch08	1672600	1672800	22.6	SL4.0ch08:1672700	-5769	Solyc08g007110.4.1	Haloacid dehalogenase-like hydrolase (HAD) superfamily protein (AHRD V3.3 *** A0A2U1KV95_ARTAN)
Replicates 1_1	SL4.0ch02	50948701	50948901	22.2	SL4.0ch02:50948801	-16	Solyc02g091670.1.1	Octicosapeptide/Phox/Bem1p family protein (AHRD V3.3 *-* A0A1P8BCE3_ARATH)
Replicates 1_1	SL4.0ch03	64151415	64151615	29.1	SL4.0ch03:64151515	-6863	Solyc03g121610.3.1	Late embryogenesis abundant (LEA) hydroxyproline-rich glycoprotein family (AHRD V3.3 *** A0A2U1MMJ0_ARTAN)
Replicates 1_1	SL4.0ch08	9567246	9567446	71.9	SL4.0ch08:9567346	-2358	Solyc08g150111.1.1	Unknown protein
Replicates 1_1	SL4.0ch08	9583929	9584129	35.3	SL4.0ch08:9584029	-10741	Solyc08g016799.1.1	Unknown protein
Replicates 1_1	SL4.0ch07	65228053	65228253	32	SL4.0ch07:65228153	-33095	Solyc07g062670.1.1	Calcium-binding EF-hand family protein (AHRD V3.3 *** A0A2U1MZJ3_ARTAN)
Replicates 1_1	SL4.0ch01	80909513	80909713	31.6	SL4.0ch01:80909613	-8129	Solyc01g098020.2.1	S-adenosyl-L-methionine-dependent methyltransferases superfamily protein (AHRD V3.3 *** Q9MAA9_ARATH)
Replicates 1_1	SL4.0ch11	2608389	2608589	38	SL4.0ch11:2608489	-7788	Solyc11g008350.2.1	Pseudouridine synthase family protein (AHRD V3.3 *** A0A1P8AXV3_ARATH)
Replicates 1_1	SL4.0ch01	75900591	75900791	34	SL4.0ch01:75900691	-13717	Solyc01g089940.1.1	F-box domain (AHRD V3.3 *-* A0A200QFG4_9MAGN)
Replicates 1_1	SL4.0ch00	671595	671795	36	SL4.0ch00:671695	-29851	Solyc00g500015.1.1	Unknown protein
Replicates 1_1	SL4.0ch05	3631407	3631607	36	SL4.0ch05:3631507	-25219	Solyc05g009430.3.1	transmembrane protein (AHRD V3.3 *-* AT1G25400.2)
Replicates 1_1	SL4.0ch01	86638484	86638684	25	SL4.0ch01:86638584	-1557	Solyc01g106440.3.1	Inorganic pyrophosphatase (AHRD V3.3 *** A0A2G2W8Z5_CAPBA)
Replicates 1_1	SL4.0ch03	36261063	36261263	25	SL4.0ch03:36261163	-38468	Solyc03g065190.1.1	Protein phosphatase 2C (PP2C)-like domain (AHRD V3.3 *-* A0A200Q711_9MAGN)
Replicates 1_1	SL4.0ch04	5598664	5598864	25	SL4.0ch04:5598764	-3078	Solyc04g015360.3.1	GATA transcription factor (AHRD V3.3 *** K4BQ39_SOLLC)
Replicates 1_1	SL4.0ch04	6646512	6646712	25	SL4.0ch04:6646612	-13068	Solyc04g150112.2.1	Thioredoxin reductase (AHRD V3.11 *** tr|A0A2G3BH62|A0A2G3BH62_CAPCH)
Replicates 1_1	SL4.0ch09	60850413	60850613	25	SL4.0ch09:60850513	-8973	Solyc09g066300.3.1	2-oxoglutarate (2OG) and Fe(II)-dependent oxygenase superfamily protein (AHRD V3.11 *** tr|A0A2U1NR61|A0A2U1NR61_ARTAN)
Replicates 1_1	SL4.0ch10	10549946	10550146	25	SL4.0ch10:10550046	-9013	Solyc10g018870.2.1	Unknown protein
Replicates 1_1	SL4.0ch11	51635345	51635545	25	SL4.0ch11:51635445	-5585	Solyc11g069020.4.1	T-complex protein 1 subunit beta (AHRD V3.3 *** A0A2G2YHG6_CAPAN)
Replicates 1_1	SL4.0ch11	52471473	52471673	24.9	SL4.0ch11:52471573	-24617	Solyc11g069765.1.1	P-loop NTPase domain-containing protein LPA1-like protein 1 (AHRD V3.3 *** A0A2G3BBZ6_CAPCH)
Replicates 1_1	SL4.0ch12	1520048	1520248	24.6	SL4.0ch12:1520148	-9548	Solyc12g160520.1.1	Heat shock transcription factor (AHRD V3.3 *-* A0A1Y1I763_KLENI)
Replicates 1_1	SL4.0ch10	61818411	61818611	24.6	SL4.0ch10:61818511	-4977	Solyc10g081690.1.1	hypothetical protein (AHRD V3.3 *-* AT2G27180.1)
Replicates 1_1	SL4.0ch05	61792757	61792957	24.4	SL4.0ch05:61792857	-6495	Solyc05g052060.2.1	DNA-binding protein Pti4
Replicates 1_1	SL4.0ch04	62914577	62914777	23	SL4.0ch04:62914677	-2609	Solyc04g080890.4.1	GTPase OBG (AHRD V3.3 *-* A0A2K3KZU3_TRIPR)
Replicates 1_1	SL4.0ch01	87505705	87505905	27	SL4.0ch01:87505805	-9191	Solyc01g107740.3.1	phosphatidylinositol 3
Replicates 1_1	SL4.0ch04	57804510	57804710	27	SL4.0ch04:57804610	-4792	Solyc04g072900.1.1	dehydration-responsive element binding protein 3
Replicates 1_1	SL4.0ch00	9317024	9317224	26.9	SL4.0ch00:9317124	-109759	Solyc00g500397.1.1	Unknown protein
Replicates 1_1	SL4.0ch08	60105971	60106171	26.7	SL4.0ch08:60106071	-11869	Solyc08g078160.3.1	Ethylene-responsive transcription factor 2 (AHRD V3.3 *** A0A2G3DC56_CAPCH)
Replicates 1_1	SL4.0ch10	63759164	63759364	26.4	SL4.0ch10:63759264	-1	Solyc10g085410.3.1	Cactin (AHRD V3.3 *** A0A2G3BFE1_CAPCH)
Replicates 1_1	SL4.0ch00	744504	744704	26.4	SL4.0ch00:744604	-155411	Solyc02g010630.2.1	Unknown protein
Replicates 1_1	SL4.0ch09	4718870	4719070	26.3	SL4.0ch09:4718970	-18988	Solyc09g011370.3.1	protein MIZU-KUSSEI 1-like (AHRD V3.3 *** A0A2I4DSR5_9ROSI)
Replicates 1_1	SL4.0ch12	64845461	64845661	26.3	SL4.0ch12:64845561	-1398	Solyc12g096380.1.1	Peptidyl-tRNA hydrolase II (PTH2) family protein (AHRD V3.3 *-* Q9FT62_ARATH)
Replicates 1_1	SL4.0ch02	41387710	41387910	26.2	SL4.0ch02:41387810	-72	Solyc02g078760.1.1	hypothetical protein (AHRD V3.3 *** AT1G11125.1)
Replicates 1_1	SL4.0ch08	9514423	9514623	172	SL4.0ch08:9514523	-1213	Solyc08g016796.1.1	Unknown protein
Replicates 1_1	SL4.0ch04	55378737	55378937	21.7	SL4.0ch04:55378837	-2597	Solyc04g064870.3.1	MADS-box transcription factor 23 (AHRD V3.3 *** A0A2G2Y5S9_CAPAN)
Replicates 1_1	SL4.0ch12	65687596	65687796	21.6	SL4.0ch12:65687696	-29908	Solyc12g098810.2.1	Unknown protein
Replicates 1_1	SL4.0ch12	2519247	2519447	21.1	SL4.0ch12:2519347	-8347	Solyc12g009170.2.1	Inter-alpha-trypsin inhibitor heavy chain-like protein (AHRD V3.3 *** Q8L798_ARATH)
Replicates 1_1	SL4.0ch07	65827568	65827768	39	SL4.0ch07:65827668	-731	Solyc07g063550.3.1	hypothetical protein (AHRD V3.3 *** AT2G20820.1)
Replicates 1_1	SL4.0ch01	64545664	64545864	29	SL4.0ch01:64545764	-28448	Solyc01g065530.3.1	leucine-rich repeat extensin-like protein 6 (AHRD V3.3 *-* XP_010321602.1)
Replicates 1_1	SL4.0ch02	22724764	22724964	29	SL4.0ch02:22724864	-1159	Solyc02g022860.1.1	FAD-binding Berberine family protein (AHRD V3.3 *** A0A2U1MQE5_ARTAN)
Replicates 1_1	SL4.0ch02	44211212	44211412	29	SL4.0ch02:44211312	-8701	Solyc02g082550.3.1	Calcium-binding EF hand family protein (AHRD V3.3 *** A0A1P8AQ08_ARATH)
Replicates 1_1	SL4.0ch11	11898356	11898556	28.7	SL4.0ch11:11898456	-10618	Solyc11g020660.1.1	TCP transcription factor 12
Replicates 1_1	SL4.0ch05	63977836	63978036	31	SL4.0ch05:63977936	-11513	Solyc05g054750.3.1	Sulfate transporter (AHRD V3.3 *** Q93YK5_BRANA)
Replicates 1_1	SL4.0ch11	50038005	50038205	35	SL4.0ch11:50038105	-129	Solyc11g066280.3.1	ribosome production factor 1 (AHRD V3.3 *** A0A2I4FRK6_9ROSI)
Replicates 1_1	SL4.0ch04	62760109	62760309	33	SL4.0ch04:62760209	-14155	Solyc04g080660.4.1	P-loop containing nucleoside triphosphate hydrolases superfamily protein (AHRD V3.11 *** tr|A0A2U1NGY3|A0A2U1NGY3_ARTAN)
Replicates 1_1	SL4.0ch08	58599968	58600168	33	SL4.0ch08:58600068	-19261	Solyc08g076520.3.1	Plastid lipid-associated protein chloroplastic-like (AHRD V3.3 *** A0A2K3PR63_TRIPR)
Replicates 1_1	SL4.0ch08	9460841	9461041	78.2	SL4.0ch08:9460941	-41043	Solyc08g016794.1.1	Unknown protein
Replicates 1_1	SL4.0ch07	19772420	19772620	24	SL4.0ch07:19772520	-10697	Solyc07g021570.1.1	Unknown protein
Replicates 1_1	SL4.0ch11	51531270	51531470	24	SL4.0ch11:51531370	-2416	Solyc11g068893.1.1	Late embryogenesis abundant hydroxyproline-rich glycoprotein (AHRD V3.3 *-* A0A2K3L117_TRIPR)
Replicates 1_1	SL4.0ch03	49583789	49583989	23.8	SL4.0ch03:49583889	-43545	Solyc03g160390.1.1	ethylene response factor A.2
Replicates 1_1	SL4.0ch10	63759327	63759527	23.6	SL4.0ch10:63759427	-2445	Solyc10g085400.3.1	Cactin (AHRD V3.3 *** A0A2G3BFE1_CAPCH)
Replicates 1_1	SL4.0ch01	77518238	77518438	23.5	SL4.0ch01:77518338	-18129	Solyc01g091660.3.1	S-adenosyl-L-methionine-dependent methyltransferases superfamily protein (AHRD V3.3 *** A0A2U1NM08_ARTAN)
Replicates 1_1	SL4.0ch12	66201474	66201674	23.4	SL4.0ch12:66201574	-3	Solyc12g099560.2.1	Arginine methyltransferase (AHRD V3.3 *** A0A1Y1HZY4_KLENI)
Replicates 1_1	SL4.0ch03	1824490	1824690	23.1	SL4.0ch03:1824590	-23122	Solyc03g007190.3.1	Protein phosphatase 2C (AHRD V3.3 *** A0A2U1KYU0_ARTAN)
Replicates 1_1	SL4.0ch00	6804911	6805111	64.4	SL4.0ch00:6805011	-58050	Solyc00g500290.2.1	Unknown protein
Replicates 1_1	SL4.0ch03	4907052	4907252	40	SL4.0ch03:4907152	-5038	Solyc03g033490.3.1	Cold-shock protein (AHRD V3.3 *-* A0A200RAC1_9MAGN)
Replicates 1_1	SL4.0ch09	753345	753545	40	SL4.0ch09:753445	-7029	Solyc09g007100.3.1	Protein MODIFIER OF SNC1 11 (AHRD V3.11 *** tr|A0A2G2VZF0|A0A2G2VZF0_CAPBA)
Replicates 1_1	SL4.0ch12	1519748	1519948	18.4	SL4.0ch12:1519848	-9248	Solyc12g160520.1.1	Heat shock transcription factor (AHRD V3.3 *-* A0A1Y1I763_KLENI)
Replicates 1_1	SL4.0ch00	459953	460153	80	SL4.0ch00:460053	-18336	Solyc00g500005.1.1	Unknown protein
Replicates 1_1	SL4.0ch06	43007474	43007674	25.8	SL4.0ch06:43007574	-22124	Solyc06g073520.3.1	La-related protein 1 (AHRD V3.3 *** A0A2G3CAE9_CAPCH)
Replicates 1_1	SL4.0ch00	1628467	1628667	83	SL4.0ch00:1628567	-39584	Solyc00g500088.2.1	Unknown protein
Replicates 1_1	SL4.0ch05	59828199	59828399	45	SL4.0ch05:59828299	-725	Solyc05g050310.1.1	Glycosyl hydrolase superfamily protein (AHRD V3.3 *** A0A2U1QD96_ARTAN)
Replicates 1_1	SL4.0ch03	937086	937286	36	SL4.0ch03:937186	-19145	Solyc03g006350.3.1	Ethylene-responsive transcription factor 4 (AHRD V3.3 *-* A0A2G2VSG2_CAPBA)
Replicates 1_1	SL4.0ch03	50724021	50724221	21	SL4.0ch03:50724121	-15788	Solyc03g095200.1.1	Superoxide dismutase (AHRD V3.3 *** S8E1B9_9LAMI)
Replicates 1_1	SL4.0ch08	60441976	60442176	20.6	SL4.0ch08:60442076	-12659	Solyc08g078550.1.1	O-fucosyltransferase (AHRD V3.3 *** A0A2P5AVU2_PARAD)
Replicates 1_1	SL4.0ch08	63593422	63593622	20.4	SL4.0ch08:63593522	-9450	Solyc08g082755.1.1	Plant regulator RWP-RK family protein (AHRD V3.3 *** G7IAL8_MEDTR)
Replicates 1_1	SL4.0ch01	81192362	81192562	20.3	SL4.0ch01:81192462	-196	Solyc01g098410.4.1	Lyk13 (AHRD V3.3 *** G3KGB4_SOLLC)
Replicates 1_1	SL4.0ch11	52471273	52471473	20.1	SL4.0ch11:52471373	-24417	Solyc11g069765.1.1	P-loop NTPase domain-containing protein LPA1-like protein 1 (AHRD V3.3 *** A0A2G3BBZ6_CAPCH)
Replicates 1_1	SL4.0ch03	63064520	63064720	20	SL4.0ch03:63064620	-8068	Solyc03g120150.3.1	DUF632 domain-containing protein/DUF630 domain-containing protein (AHRD V3.3 *-* A0A1Q3CDM4_CEPFO)
Replicates 1_1	SL4.0ch03	59958027	59958227	27.8	SL4.0ch03:59958127	-2035	Solyc03g115985.1.1	Geranylgeranyl diphosphate reductase
Replicates 1_1	SL4.0ch08	47311336	47311536	27.1	SL4.0ch08:47311436	-42602	Solyc08g061590.5.1	Copper-transporting ATPase PAA2
Replicates 1_1	SL4.0ch02	49007564	49007764	34	SL4.0ch02:49007664	-9301	Solyc02g089065.1.1	Methyl esterase 11 (AHRD V3.3 *** A0A2U1LRP6_ARTAN)
Replicates 1_1	SL4.0ch09	67459070	67459270	34	SL4.0ch09:67459170	-879	Solyc09g092220.3.1	magnesium transporter NIPA (DUF803) (AHRD V3.3 *** AT4G13800.8)
Replicates 1_1	SL4.0ch11	263921	264121	34	SL4.0ch11:264021	-6428	Solyc11g005320.1.1	RING/U-box superfamily protein (AHRD V3.3 *** A0A2U1QK74_ARTAN)
Replicates 1_1	SL4.0ch08	60736348	60736548	30	SL4.0ch08:60736448	-375	Solyc08g078960.4.1	Unknown protein
Replicates 1_1	SL4.0ch11	6177345	6177545	30	SL4.0ch11:6177445	-26267	Solyc11g013220.2.1	Oxysterol-binding protein (AHRD V3.3 *** A0A200QNE7_9MAGN)
Replicates 1_1	SL4.0ch01	75486228	75486428	23	SL4.0ch01:75486328	-11249	Solyc01g088450.2.1	RING/U-box superfamily protein (AHRD V3.3 *-* A0A2U1LDD8_ARTAN)
Replicates 1_1	SL4.0ch01	82829874	82830074	23	SL4.0ch01:82829974	-3060	Solyc01g100570.4.1	Pentatricopeptide repeat (AHRD V3.3 *** A0A200R237_9MAGN)
Replicates 1_1	SL4.0ch03	62923255	62923455	23	SL4.0ch03:62923355	-45	Solyc03g119950.1.1	Pentatricopeptide repeat-containing protein
Replicates 1_1	SL4.0ch04	64283417	64283617	23	SL4.0ch04:64283517	-3565	Solyc04g082745.1.1	3-beta hydroxysteroid dehydrogenase/isomerase (AHRD V3.3 *** A0A200PR22_9MAGN)
Replicates 1_1	SL4.0ch11	27909919	27910119	23	SL4.0ch11:27910019	-175379	Solyc11g045610.2.1	Cyclin-dependent kinase C-1 (AHRD V3.3 *** A0A1U8GPD8_CAPAN)
Replicates 1_1	SL4.0ch02	43448380	43448580	22.9	SL4.0ch02:43448480	-1112	Solyc02g150133.1.1	Plant organelle RNA recognition domain protein (AHRD V3.3 *** A0A072UXM1_MEDTR)
Replicates 1_1	SL4.0ch04	62161765	62161965	22.3	SL4.0ch04:62161865	-9237	Solyc04g079870.2.1	Hexosyltransferase (AHRD V3.3 *** A0A2G2ZRY0_CAPAN)
Replicates 1_1	SL4.0ch02	45759129	45759329	22.1	SL4.0ch02:45759229	-5540	Solyc02g084660.3.1	UPF0651 protein
Replicates 1_1	SL4.0ch06	38288779	38288979	22.1	SL4.0ch06:38288879	-16977	Solyc06g065160.1.1	TCP transcription factor 13
Replicates 1_1	SL4.0ch08	50483950	50484150	37	SL4.0ch08:50484050	-4038	Solyc08g150129.1.1	Heat shock transcription factor (AHRD V3.11 *-* tr|A0A1Y1I763|A0A1Y1I763_KLENI)
Replicates 1_1	SL4.0ch08	54575553	54575753	36.1	SL4.0ch08:54575653	-12262	Solyc08g067450.1.1	DNAse I-like superfamily protein (AHRD V3.3 *-* A0A178UDZ2_ARATH)
Replicates 1_1	SL4.0ch01	74969160	74969360	25	SL4.0ch01:74969260	-27312	Solyc01g087880.3.1	Unknown protein
Replicates 1_1	SL4.0ch08	14554328	14554528	25	SL4.0ch08:14554428	-55062	Solyc08g048150.1.1	Unknown protein
Replicates 1_1	SL4.0ch08	61870294	61870494	25	SL4.0ch08:61870394	-6033	Solyc08g080480.3.1	SUN-like protein 23
Replicates 1_1	SL4.0ch06	28857923	28858123	24.9	SL4.0ch06:28858023	-6813	Solyc06g048510.5.1	WD-40 repeat containing protein (AHRD V3.11 *** tr|A0A0K0XR03|A0A0K0XR03_TOBAC)
Replicates 1_1	SL4.0ch06	37514770	37514970	24.9	SL4.0ch06:37514870	-6950	Solyc06g063120.4.1	RING/U-box superfamily protein (AHRD V3.3 *** A0A2U1LDD8_ARTAN)
Replicates 1_1	SL4.0ch04	56980999	56981199	34.7	SL4.0ch04:56981099	-18347	Solyc04g072040.1.1	LRR receptor-like kinase (AHRD V3.3 *** A0A072VNN3_MEDTR)
Replicates 1_1	SL4.0ch05	4221559	4221759	34.2	SL4.0ch05:4221659	-6863	Solyc05g009950.3.1	Protein decapping 5 (AHRD V3.3 *** A0A2G3B6L4_CAPCH)
Replicates 1_1	SL4.0ch03	61611848	61612048	32.9	SL4.0ch03:61611948	-7898	Solyc03g118255.1.1	Magnesium-protoporphyrin IX methyltransferase (AHRD V3.11 *** tr|A0A1P8B4G1|A0A1P8B4G1_ARATH)
Replicates 1_1	SL4.0ch04	57460984	57461184	27	SL4.0ch04:57461084	-2981	Solyc04g072530.2.1	Mitochondrial transcription termination factor family protein (AHRD V3.3 *** Q9SD94_ARATH)
Replicates 1_1	SL4.0ch07	60322511	60322711	27	SL4.0ch07:60322611	-6268	Solyc07g051870.1.1	MAP kinase kinase kinase 52
Replicates 1_1	SL4.0ch08	437696	437896	26.9	SL4.0ch08:437796	-13864	Solyc08g005580.3.1	Root UVB sensitive family (AHRD V3.11 *** tr|A0A2U1QLM3|A0A2U1QLM3_ARTAN)
Replicates 1_1	SL4.0ch05	3104104	3104304	26.7	SL4.0ch05:3104204	-9599	Solyc05g008810.4.1	Octicosapeptide/Phox/Bem1p family protein (AHRD V3.3 *-* A0A2K3L5A6_TRIPR)
Replicates 1_1	SL4.0ch11	53506462	53506662	26.6	SL4.0ch11:53506562	-2464	Solyc11g072220.2.1	Ubiquitin-like-specific protease 1D (AHRD V3.3 *-* A0A1J3EWQ3_NOCCA)
Replicates 1_1	SL4.0ch02	47588705	47588905	26.5	SL4.0ch02:47588805	-4809	Solyc02g087020.1.1	NHL domain protein (AHRD V3.3 *** A0A1P8BDM5_ARATH)
Replicates 1_1	SL4.0ch01	80624587	80624787	31	SL4.0ch01:80624687	-5675	Solyc01g097580.1.1	Protein SUPPRESSOR OF K(+) TRANSPORT GROWTH DEFECT 1 (AHRD V3.3 *-* A0A2G2W7B7_CAPBA)
Replicates 1_1	SL4.0ch02	35834971	35835171	31	SL4.0ch02:35835071	-20596	Solyc02g067660.4.1	Glycosyltransferase (AHRD V3.3 *** A0A2U1M9M1_ARTAN)
Replicates 1_1	SL4.0ch06	42612898	42613098	31	SL4.0ch06:42612998	-4611	Solyc06g072920.3.1	Aluminum-activated malate transporter 9 (AHRD V3.3 *-* A0A2D1A7Z5_SOLLC)
Replicates 1_1	SL4.0ch01	84593760	84593960	30.3	SL4.0ch01:84593860	-7288	Solyc01g103770.3.1	Unknown protein
Replicates 1_1	SL4.0ch03	4089131	4089331	29	SL4.0ch03:4089231	-10642	Solyc03g031700.5.1	RNA-binding protein (AHRD V3.3 *** A0A2K3PBB6_TRIPR)
Replicates 1_1	SL4.0ch05	5878789	5878989	28.2	SL4.0ch05:5878889	-2306	Solyc05g012580.1.1	protein qua-1 isoform X1 (AHRD V3.3 *** XP_010321178.1)
Replicates 1_1	SL4.0ch08	9500984	9501184	115.7	SL4.0ch08:9501084	-900	Solyc08g016794.1.1	Unknown protein
Replicates 1_1	SL4.0ch01	79892117	79892317	20	SL4.0ch01:79892217	-3951	Solyc01g096540.4.1	Protein arginine N-methyltransferase (AHRD V3.3 *** A0A200R777_9MAGN)
Replicates 1_1	SL4.0ch01	81308165	81308365	20	SL4.0ch01:81308265	-1845	Solyc01g098555.1.1	Sugar facilitator protein 8
Replicates 1_1	SL4.0ch06	41708419	41708619	20	SL4.0ch06:41708519	-1594	Solyc06g071540.3.1	60S ribosomal protein L44 (AHRD V3.11 *** tr|A0A2G3CYG5|A0A2G3CYG5_CAPCH)
Replicates 1_1	SL4.0ch11	1195819	1196019	20	SL4.0ch11:1195919	-4481	Solyc11g006460.3.1	Core-2 i-branching beta-n-acetylglucosaminyltransferase family protein (AHRD V3.3 *** A0A2K3MQ33_TRIPR)
Replicates 1_1	SL4.0ch09	1838267	1838467	19.6	SL4.0ch09:1838367	-876	Solyc09g008335.2.1	Zinc finger
Replicates 1_1	SL4.0ch10	6251847	6252047	19.1	SL4.0ch10:6251947	-2303	Solyc10g044500.2.1	60S ribosomal protein L19-2 (AHRD V3.11 *-* tr|A0A2G3C1J0|A0A2G3C1J0_CAPCH)
Replicates 1_1	SL4.0ch05	65041983	65042183	22	SL4.0ch05:65042083	-924	Solyc05g056320.3.1	Smr (Small MutS-related) domain protein (AHRD V3.3 *** A0A2K3NNB3_TRIPR)
Replicates 1_1	SL4.0ch02	47588632	47588832	19.5	SL4.0ch02:47588732	-4736	Solyc02g087020.1.1	NHL domain protein (AHRD V3.3 *** A0A1P8BDM5_ARATH)
Replicates 1_1	SL4.0ch00	1625334	1625534	61	SL4.0ch00:1625434	-36451	Solyc00g500088.2.1	Unknown protein
Replicates 1_1	SL4.0ch00	1596175	1596375	49.1	SL4.0ch00:1596275	-7292	Solyc00g500088.2.1	Unknown protein
Replicates 1_1	SL4.0ch00	9235386	9235586	37.4	SL4.0ch00:9235486	-1359	Solyc00g500399.1.1	Unknown protein
Replicates 1_1	SL4.0ch10	60470022	60470222	22	SL4.0ch10:60470122	-3910	Solyc10g079880.2.1	Calcium-binding EF-hand family protein (AHRD V3.3 *** A0A2U1NS17_ARTAN)
Replicates 1_1	SL4.0ch00	8257040	8257240	35	SL4.0ch00:8257140	-114756	Solyc00g500365.1.1	1-deoxy-D-xylulose 5-phosphate reductoisomerase
Replicates 1_1	SL4.0ch07	58672466	58672666	36	SL4.0ch07:58672566	-33425	Solyc07g045610.1.1	Class I heat shock protein (AHRD V3.3 *-* A0A2K3JRP0_TRIPR)
Replicates 1_1	SL4.0ch10	2623345	2623545	36	SL4.0ch10:2623445	-3424	Solyc10g008665.1.1	HXXXD-type acyl-transferase family protein (AHRD V3.11 *** tr|A0A2U1NMZ6|A0A2U1NMZ6_ARTAN)
Replicates 1_1	SL4.0ch02	32432695	32432895	22	SL4.0ch02:32432795	-110	Solyc02g062700.3.1	ATPase family AAA domain-containing protein 3-like (AHRD V3.3 *** A0A2I4E883_9ROSI)
Replicates 1_1	SL4.0ch02	46713894	46714094	22	SL4.0ch02:46713994	-1396	Solyc02g085920.3.1	Peroxidase (AHRD V3.3 *** K4BBA2_SOLLC)
Replicates 1_1	SL4.0ch05	62811846	62812046	22	SL4.0ch05:62811946	-3661	Solyc05g053300.3.1	Protein phosphatase-2C (AHRD V3.3 *** O82469_MESCR)
Replicates 1_1	SL4.0ch07	1886496	1886696	22	SL4.0ch07:1886596	-15789	Solyc07g007140.3.1	hypothetical protein (AHRD V3.3 -** AT5G35090.1)
Replicates 1_1	SL4.0ch08	52535084	52535284	22	SL4.0ch08:52535184	-57933	Solyc08g066030.3.1	Cytosolic Fe-S cluster assembly factor narfl (AHRD V3.3 *** A0A2S1CF11_PRUYE)
Replicates 1_1	SL4.0ch09	60949960	60950160	21.2	SL4.0ch09:60950060	-9410	Solyc09g066420.3.1	Casein kinase I (AHRD V3.3 *** A0A2U1P195_ARTAN)
Replicates 1_1	SL4.0ch03	49584026	49584226	21.2	SL4.0ch03:49584126	-43782	Solyc03g160390.1.1	ethylene response factor A.2
Replicates 1_1	SL4.0ch06	8639300	8639500	18	SL4.0ch06:8639400	-5546	Solyc06g011662.1.1	Unknown protein
Replicates 1_1	SL4.0ch02	35539526	35539726	33.2	SL4.0ch02:35539626	-33350	Solyc02g067350.3.1	Zinc-finger homeodomain protein 10 (AHRD V3.3 *** A0A2G3D3J7_CAPCH)
Replicates 1_1	SL4.0ch02	49420596	49420796	21	SL4.0ch02:49420696	-6820	Solyc02g150147.1.1	proline dehydrogenase
Replicates 1_1	SL4.0ch01	77499281	77499481	24	SL4.0ch01:77499381	-6659	Solyc01g091650.3.1	NAD(P)-binding Rossmann-fold superfamily protein (AHRD V3.3 *** A0A2U1QER6_ARTAN)
Replicates 1_1	SL4.0ch04	32511832	32512032	24	SL4.0ch04:32511932	-38412	Solyc04g045450.1.1	Unknown protein
Replicates 1_1	SL4.0ch11	31029041	31029241	24	SL4.0ch11:31029141	-10133	Solyc11g161140.1.1	Feruloyl CoA ortho-hydroxylase 2 (AHRD V3.11 *** tr|A0A2G2WER4|A0A2G2WER4_CAPBA)
Replicates 1_1	SL4.0ch10	272317	272517	23.8	SL4.0ch10:272417	-28030	Solyc10g005480.3.1	Protein strawberry notch (AHRD V3.3 *** A0A2G3BCB2_CAPCH)
Replicates 1_1	SL4.0ch08	61346180	61346380	23.7	SL4.0ch08:61346280	-8996	Solyc08g079760.5.1	1-aminocyclopropane-1-carboxylate synthase (AHRD V3.3 *** Q6U5H3_ROSHC)
Replicates 1_1	SL4.0ch04	61967653	61967853	23.7	SL4.0ch04:61967753	-13243	Solyc04g079590.3.1	Dof zinc finger protein (AHRD V3.3 *-* A0A2K3NXA1_TRIPR)
Replicates 1_1	SL4.0ch01	78124379	78124579	32	SL4.0ch01:78124479	-15019	Solyc01g094330.3.1	RNA helicase DEAD4
Replicates 1_1	SL4.0ch12	61597757	61597957	31.8	SL4.0ch12:61597857	-45623	Solyc12g056080.2.1	endochitinase A-like (AHRD V3.3 *** XP_010314523.1)
Replicates 1_1	SL4.0ch09	66285564	66285764	29.6	SL4.0ch09:66285664	-9127	Solyc09g090770.2.1	Major facilitator superfamily protein (AHRD V3.3 *** A0A2U1PVI2_ARTAN)
Replicates 1_1	SL4.0ch05	62195561	62195761	29.6	SL4.0ch05:62195661	-6973	Solyc05g052600.4.1	Pkinase domain-containing protein (AHRD V3.3 *** A0A1Q3DF19_CEPFO)
Replicates 1_1	SL4.0ch02	43029876	43030076	29.5	SL4.0ch02:43029976	-20501	Solyc02g080930.3.1	Core-2 i-branching beta-n-acetylglucosaminyltransferase family protein (AHRD V3.3 *-* A0A2K3MVY8_TRIPR)
Replicates 1_1	SL4.0ch10	3723210	3723410	26	SL4.0ch10:3723310	-25422	Solyc10g011660.3.1	Mitochondrial carrier protein (AHRD V3.3 *** A0A200PUN8_9MAGN)
Replicates 1_1	SL4.0ch12	49891748	49891948	26	SL4.0ch12:49891848	-28911	Solyc12g038457.1.1	NAC domain (AHRD V3.3 *** A0A200QIU5_9MAGN)
Replicates 1_1	SL4.0ch05	2178906	2179106	21.3	SL4.0ch05:2179006	-313	Solyc05g007590.5.1	Unknown protein
Replicates 1_1	SL4.0ch00	9140974	9141174	48.4	SL4.0ch00:9141074	-2913	Solyc00g500391.1.1	Unknown protein
Replicates 1_1	SL4.0ch01	88572503	88572703	28	SL4.0ch01:88572603	-3500	Solyc01g109220.4.1	RING/U-box superfamily protein (AHRD V3.3 *-* A0A2U1Q188_ARTAN)
Replicates 1_1	SL4.0ch06	33082437	33082637	28	SL4.0ch06:33082537	-15101	Solyc06g051745.2.1	Cytochrome P450 (AHRD V3.3 *** A0A200PWT8_9MAGN)
Replicates 1_1	SL4.0ch00	9078026	9078226	38.7	SL4.0ch00:9078126	-3689	Solyc00g500384.1.1	Unknown protein
Replicates 1_1	SL4.0ch02	36715885	36716085	19	SL4.0ch02:36715985	-6448	Solyc02g068793.1.1	Alpha 1
Replicates 1_1	SL4.0ch03	63051568	63051768	19	SL4.0ch03:63051668	-2890	Solyc03g120120.3.1	Regulator of Vps4 activity in the MVB pathway protein (AHRD V3.3 *-* Q8L402_ARATH)
Replicates 1_1	SL4.0ch06	11941435	11941635	19	SL4.0ch06:11941535	-1840	Solyc06g016820.1.1	Unknown protein
Replicates 1_1	SL4.0ch08	60759764	60759964	19	SL4.0ch08:60759864	-5661	Solyc08g078980.1.1	Phosphatidic acid phosphatase type 2/haloperoxidase (AHRD V3.3 *** A0A200PS40_9MAGN)
Replicates 1_1	SL4.0ch10	13134514	13134714	19	SL4.0ch10:13134614	-16455	Solyc10g024337.2.1	Inorganic pyrophosphatase 1 (AHRD V3.11 *-* tr|A0A2G2ZBE0|A0A2G2ZBE0_CAPAN)
Replicates 1_1	SL4.0ch11	36338183	36338383	19	SL4.0ch11:36338283	-4783	Solyc11g040400.1.1	DnaJ domain (AHRD V3.3 *-* A0A200QA98_9MAGN)
Replicates 1_1	SL4.0ch12	6052664	6052864	18.9	SL4.0ch12:6052764	-19159	Solyc12g160280.1.1	Agamous-like mads-box protein agl80-like (AHRD V3.11 *** tr|A0A2K3MA14|A0A2K3MA14_TRIPR)
Replicates 1_1	SL4.0ch06	30527539	30527739	18.3	SL4.0ch06:30527639	-30146	Solyc06g050230.4.1	Adenine/guanine permease AZG1 (AHRD V3.3 *** A0A2G2WI90_CAPBA)
Replicates 1_1	SL4.0ch00	639008	639208	63	SL4.0ch00:639108	-62438	Solyc00g500015.1.1	Unknown protein
Replicates 1_1	SL4.0ch12	61833700	61833900	22	SL4.0ch12:61833800	-18004	Solyc12g056270.2.1	RING/U-box superfamily protein (AHRD V3.3 *-* AT2G15530.4)
Replicates 1_1	SL4.0ch01	87597773	87597973	19	SL4.0ch01:87597873	-14573	Solyc01g107880.3.1	O-acyltransferase WSD1-like protein (AHRD V3.3 *** A0A2K3ND41_TRIPR)
Replicates 1_1	SL4.0ch01	82906786	82906986	40	SL4.0ch01:82906886	-11995	Solyc01g100670.1.1	NHL repeat-containing protein 2-like (AHRD V3.3 *** A0A2K3NND0_TRIPR)
Replicates 1_1	SL4.0ch06	45126103	45126303	33	SL4.0ch06:45126203	-3372	Solyc06g076370.4.1	Protein TOC75
Replicates 1_1	SL4.0ch10	63592814	63593014	33	SL4.0ch10:63592914	-5711	Solyc10g085140.2.1	Alkyl transferase (AHRD V3.3 *** K4D3U9_SOLLC)
Replicates 1_1	SL4.0ch03	3501679	3501879	21	SL4.0ch03:3501779	-2296	Solyc03g026100.1.1	tRNA-specific adenosine deaminase TAD3 (AHRD V3.3 *** TAD3_ARATH)
Replicates 1_1	SL4.0ch06	14940224	14940424	21	SL4.0ch06:14940324	-166824	Solyc06g018060.2.1	Protein FAR-RED IMPAIRED RESPONSE 1 (AHRD V3.11 *-* tr|A0A1U8G0T1|A0A1U8G0T1_CAPAN)
Replicates 1_1	SL4.0ch08	55037911	55038111	21	SL4.0ch08:55038011	-5456	Solyc08g067880.4.1	hypothetical protein (AHRD V3.3 *** AT2G25670.2)
Replicates 1_1	SL4.0ch11	34386287	34386487	21	SL4.0ch11:34386387	-49843	Solyc11g042640.2.1	Nuclear transport factor 2 (NTF2)-like protein (AHRD V3.3 *-* Q67TV5_ORYSJ)
Replicates 1_1	SL4.0ch08	54575121	54575321	20.9	SL4.0ch08:54575221	-423	Solyc08g067430.5.1	DNAse I-like superfamily protein (AHRD V3.3 *-* A0A178UDZ2_ARATH)
Replicates 1_1	SL4.0ch04	59689349	59689549	20.6	SL4.0ch04:59689449	-11037	Solyc04g076810.4.1	Phox/Bem1p (AHRD V3.3 *** A0A200QI01_9MAGN)
Replicates 1_1	SL4.0ch12	66014782	66014982	20.3	SL4.0ch12:66014882	-9550	Solyc12g099300.1.1	Aldehyde dehydrogenase (AHRD V3.3 *** F4JC27_ARATH)
Replicates 1_1	SL4.0ch03	30588592	30588792	20.1	SL4.0ch03:30588692	-10191	Solyc03g063450.2.1	Proteasome subunit beta (AHRD V3.3 *-* A0A2G3CJ01_CAPCH)
Replicates 1_1	SL4.0ch00	4715478	4715678	78.5	SL4.0ch00:4715578	-2896	Solyc00g500233.1.1	Unknown protein
Replicates 1_1	SL4.0ch02	40556039	40556239	31	SL4.0ch02:40556139	-4185	Solyc02g077670.3.1	Alpha-1
Replicates 1_1	SL4.0ch03	12651687	12651887	31	SL4.0ch03:12651787	-34872	Solyc03g046591.1.1	Unknown protein
Replicates 1_1	SL4.0ch03	54186171	54186371	31	SL4.0ch03:54186271	-24017	Solyc03g097310.3.1	DB199
Replicates 1_1	SL4.0ch08	21256134	21256334	31	SL4.0ch08:21256234	-103601	Solyc08g044345.1.1	UB-like protease 1B (AHRD V3.3 --* AT4G00690.1)
Replicates 1_1	SL4.0ch02	49847128	49847328	31	SL4.0ch02:49847228	-22538	Solyc02g090130.4.1	Oligopeptidase B (AHRD V3.3 *** A0A2I0V9Y9_9ASPA)
Replicates 1_1	SL4.0ch03	62606302	62606502	23	SL4.0ch03:62606402	-21222	Solyc03g119580.1.1	NIMIN2b protein (AHRD V3.3 *** Q0MR95_TOBAC)
Replicates 1_1	SL4.0ch08	62997334	62997534	23	SL4.0ch08:62997434	-691	Solyc08g081960.3.1	Solanum Lycopersicum Cytokinin Response Factor 2
Replicates 1_1	SL4.0ch09	3341208	3341408	23	SL4.0ch09:3341308	-10930	Solyc09g009810.1.1	Thioredoxin family protein (AHRD V3.11 *** tr|Q940I2|Q940I2_ARATH)
Replicates 1_1	SL4.0ch12	64665535	64665735	23	SL4.0ch12:64665635	-2900	Solyc12g096060.2.1	Growth-regulating factor 4 (AHRD V3.3 *** A0A2G3BQA5_CAPCH)
Replicates 1_1	SL4.0ch04	26607799	26607999	23	SL4.0ch04:26607899	-121	Solyc04g024960.1.1	Unknown protein
Replicates 1_1	SL4.0ch09	5769065	5769265	22.9	SL4.0ch09:5769165	-21675	Solyc09g014270.1.1	HXXXD-type acyl-transferase family protein (AHRD V3.3 *** V5PZN5_9CARY)
Replicates 1_1	SL4.0ch02	40673468	40673668	22.8	SL4.0ch02:40673568	-14508	Solyc02g077860.1.1	Ethylene-responsive transcription factor 4 (AHRD V3.3 *-* A0A2G3D5H4_CAPCH)
Replicates 1_1	SL4.0ch11	1830474	1830674	22.5	SL4.0ch11:1830574	-6000	Solyc11g007550.1.1	Cytochrome P450 (AHRD V3.3 *** A0A346CEB0_TANCI)
Replicates 1_1	SL4.0ch04	4013859	4014059	22.3	SL4.0ch04:4013959	-1772	Solyc04g011550.2.1	pheromone-processing carboxypeptidase KEX1-like (AHRD V3.3 --* XP_022740211.1)
Replicates 1_1	SL4.0ch08	48032335	48032535	22.3	SL4.0ch08:48032435	-67466	Solyc08g061930.4.1	Cytokinin oxidase/dehydrogenase (AHRD V3.11 *** tr|C3VPM8|C3VPM8_SOLTU)
Replicates 1_1	SL4.0ch01	87098880	87099080	22.2	SL4.0ch01:87098980	-16405	Solyc01g107180.3.1	Zinc finger protein (AHRD V3.3 *** A0T3Q5_SOLTU)
Replicates 1_1	SL4.0ch10	43833209	43833409	22.1	SL4.0ch10:43833309	-18682	Solyc10g049270.2.1	Serine carboxypeptidase (AHRD V3.3 *** A0A2U1P833_ARTAN)
Replicates 1_1	SL4.0ch12	66014459	66014659	22	SL4.0ch12:66014559	-9873	Solyc12g099300.1.1	Fip1 domain-containing protein (AHRD V3.3 *** A0A1Q3BSA1_CEPFO)
Replicates 1_1	SL4.0ch01	60701452	60701652	29	SL4.0ch01:60701552	-78186	Solyc01g058677.1.1	Transcription factor (AHRD V3.3 *** A0A2G3DG53_CAPCH)
Replicates 1_1	SL4.0ch03	5087235	5087435	29	SL4.0ch03:5087335	-9430	Solyc03g033640.3.1	Zinc finger CCCH domain-containing protein 44 (AHRD V3.3 *** A0A2G3CKZ0_CAPCH)
Replicates 1_1	SL4.0ch08	60160537	60160737	29	SL4.0ch08:60160637	-9286	Solyc08g078230.4.1	PPPDE putative thiol peptidase family protein (AHRD V3.3 *** A0A2U1KMT1_ARTAN)
Replicates 1_1	SL4.0ch12	63339216	63339416	29	SL4.0ch12:63339316	-6194	Solyc12g088370.2.1	RING-type E3 ubiquitin transferase (AHRD V3.3 *-* A0A2I4H694_9ROSI)
Replicates 1_1	SL4.0ch03	3705600	3705800	28.9	SL4.0ch03:3705700	-13487	Solyc03g026260.4.1	Dehydration-responsive element-binding transcription factor (AHRD V3.3 *** A0A1S6M2D0_9CARY)
Replicates 1_1	SL4.0ch02	37229898	37230098	27	SL4.0ch02:37229998	-5702	Solyc02g069280.2.1	Argonaute 2b
Replicates 1_1	SL4.0ch00	2668903	2669103	26.1	SL4.0ch00:2669003	-89220	Solyc00g500158.1.1	Unknown protein
Replicates 1_1	SL4.0ch01	71337885	71338085	25	SL4.0ch01:71337985	-13038	Solyc01g079650.3.1	pollen-specific LRR extensin-like protein Chr2
Replicates 1_1	SL4.0ch05	7384986	7385186	25	SL4.0ch05:7385086	-260	Solyc05g013880.2.1	Transducin/WD40 repeat-like superfamily protein (AHRD V3.11 *** tr|A0A2U1NTK1|A0A2U1NTK1_ARTAN)
Replicates 1_1	SL4.0ch10	32273024	32273224	24.7	SL4.0ch10:32273124	-86331	Solyc10g045420.3.1	histone acetyltransferase GCN5 (AHRD V3.3 *** A0A2I4GKZ2_9ROSI)
Replicates 1_1	SL4.0ch08	9435563	9435763	72.6	SL4.0ch08:9435663	-9140	Solyc08g150109.1.1	Unknown protein
Replicates 1_1	SL4.0ch04	6948646	6948846	36	SL4.0ch04:6948746	-15950	Solyc04g016150.2.1	F-box/LRR-repeat protein At5g63520-like (AHRD V3.3 *** A0A2I4FAV8_9ROSI)
Replicates 1_1	SL4.0ch05	8834715	8834915	23	SL4.0ch05:8834815	-39295	Solyc05g014690.3.1	BnaA02g22270D protein (AHRD V3.11 -** tr|A0A078FKB2|A0A078FKB2_BRANA)
Replicates 1_1	SL4.0ch08	60371932	60372132	18	SL4.0ch08:60372032	-6460	Solyc08g078480.4.1	Oxidoreductase family protein (AHRD V3.3 *** A0A2U1N6F1_ARTAN)
Replicates 1_1	SL4.0ch09	46676232	46676432	18	SL4.0ch09:46676332	-5743	Solyc09g161000.1.1	zinc-finger homeodomain protein 4-like (AHRD V3.11 *-* XP_010314609.1)
Replicates 1_1	SL4.0ch10	31569175	31569375	18	SL4.0ch10:31569275	-51439	Solyc10g045290.2.1	Protein kinase family protein (AHRD V3.3 *** X5I191_IPONI)
Replicates 1_1	SL4.0ch00	9192277	9192477	74.8	SL4.0ch00:9192377	-11120	Solyc00g500396.1.1	Unknown protein
Replicates 1_1	SL4.0ch11	17604565	17604765	27	SL4.0ch11:17604665	-120960	Solyc11g051173.1.1	Unknown protein
Replicates 1_1	SL4.0ch08	9513088	9513288	171	SL4.0ch08:9513188	-2548	Solyc08g016796.1.1	Unknown protein
Replicates 1_1	SL4.0ch00	1595807	1596007	46.9	SL4.0ch00:1595907	-6924	Solyc00g500088.2.1	Unknown protein
Replicates 1_1	SL4.0ch12	29817227	29817427	21.8	SL4.0ch12:29817327	-124856	Solyc12g070156.2.1	Unknown protein
Replicates 1_1	SL4.0ch07	1620710	1620910	32	SL4.0ch07:1620810	-1190	Solyc07g006800.1.1	Adenosylmethionine-8-amino-7-oxononanoate aminotransferase (AHRD V3.3 *** S8C9K2_9LAMI)
Replicates 1_1	SL4.0ch12	59846283	59846483	32	SL4.0ch12:59846383	-10939	Solyc12g044830.1.1	WAS/WASL-interacting family protein (AHRD V3.3 *** AT1G55160.1)
Replicates 1_1	SL4.0ch11	53619891	53620091	31.6	SL4.0ch11:53619991	-732	Solyc11g072350.1.1	CC-NBS-LRR type resistance-like protein (AHRD V3.3 *-* E3W9R6_CAPCH)
Replicates 1_1	SL4.0ch09	63429738	63429938	20	SL4.0ch09:63429838	-16027	Solyc09g075530.3.1	DUF789 domain-containing protein (AHRD V3.3 *** A0A1Q3AMZ2_CEPFO)
Replicates 1_1	SL4.0ch00	9139707	9139907	33	SL4.0ch00:9139807	-1646	Solyc00g500391.1.1	Unknown protein
Replicates 1_1	SL4.0ch01	80883584	80883784	30	SL4.0ch01:80883684	-1252	Solyc01g097980.3.1	Deoxyuridine 5'-triphosphate nucleotidohydrolase (AHRD V3.11 *** tr|A0A2G2W7R1|A0A2G2W7R1_CAPBA)
Replicates 1_1	SL4.0ch02	18229539	18229739	30	SL4.0ch02:18229639	-4975	Solyc02g014876.1.1	Unknown protein
Replicates 1_1	SL4.0ch00	723645	723845	30	SL4.0ch00:723745	-176270	Solyc02g010630.2.1	Unknown protein
Replicates 1_1	SL4.0ch01	87527031	87527231	29.7	SL4.0ch01:87527131	-13053	Solyc01g107760.5.1	glucuronoxylan 4-O-methyltransferase 1-like (AHRD V3.3 *** A0A2I4H011_9ROSI)
Replicates 1_1	SL4.0ch04	4470227	4470427	18	SL4.0ch04:4470327	-5112	Solyc04g012120.3.1	Unknown protein
Replicates 1_1	SL4.0ch02	30766190	30766390	20	SL4.0ch02:30766290	-15304	Solyc02g038819.1.1	Phosphoinositide phosphatase family protein (AHRD V3.3 *** A0A2U1LC37_ARTAN)
Replicates 1_1	SL4.0ch04	4871014	4871214	20	SL4.0ch04:4871114	-10038	Solyc04g014570.3.1	Transmembrane 9 superfamily member (AHRD V3.3 *** A0A2G3CDP8_CAPCH)
Replicates 1_1	SL4.0ch06	39318219	39318419	20	SL4.0ch06:39318319	-8731	Solyc06g066410.3.1	AP2-like ethylene-responsive transcription factor BBM2 (AHRD V3.3 *** A0A1U8H0S8_CAPAN)
Replicates 1_1	SL4.0ch09	4997979	4998179	20	SL4.0ch09:4998079	-10476	Solyc09g011680.1.1	Ethylene receptor (AHRD V3.3 *-* A0A2G2WUD6_CAPBA)
Replicates 1_1	SL4.0ch09	60227791	60227991	20	SL4.0ch09:60227891	-9532	Solyc09g065870.4.1	Phosphoribulokinase/uridine kinase (AHRD V3.3 *** A0A200Q4F8_9MAGN)
Replicates 1_1	SL4.0ch11	3166948	3167148	20	SL4.0ch11:3167048	-1495	Solyc11g008980.1.1	Phage shock protein A
Replicates 1_1	SL4.0ch04	61011107	61011307	19.7	SL4.0ch04:61011207	-4668	Solyc04g078240.3.1	metal transporter Nramp2
Replicates 1_1	SL4.0ch10	20691850	20692050	19.3	SL4.0ch10:20691950	-56143	Solyc10g150113.1.1	DUF1639 domain-containing protein (AHRD V3.3 *-* A0A1Q3BZV8_CEPFO)
Replicates 1_1	SL4.0ch12	62499845	62500045	19.3	SL4.0ch12:62499945	-10996	Solyc12g056810.2.1	Oxidoreductase (AHRD V3.3 *** A0A200QCB4_9MAGN)
Replicates 1_1	SL4.0ch05	1038299	1038499	19.3	SL4.0ch05:1038399	-6434	Solyc05g006330.2.1	Transducin/WD40 repeat-like superfamily protein (AHRD V3.3 *** A0A2U1QGB4_ARTAN)
Replicates 1_1	SL4.0ch11	18638872	18639072	19	SL4.0ch11:18638972	-264	Solyc11g027920.2.1	Ribulose bisphosphate carboxylase/oxygenase activase
Replicates 1_1	SL4.0ch05	5687043	5687243	28	SL4.0ch05:5687143	-7290	Solyc05g012350.4.1	Erlin-2 (AHRD V3.3 *** A0A2G2YD74_CAPAN)
Replicates 1_1	SL4.0ch06	40453369	40453569	28	SL4.0ch06:40453469	-3288	Solyc06g069020.5.1	LeArcA1 protein containing 7 WD40 repeats
Replicates 1_1	SL4.0ch10	629257	629457	28	SL4.0ch10:629357	-7902	Solyc10g005980.1.1	Fasciclin-like arabinogalactan protein (AHRD V3.3 *** A0A2R6P548_ACTCH)
Replicates 1_1	SL4.0ch05	63969461	63969661	27.2	SL4.0ch05:63969561	-8289	Solyc05g054740.3.1	Metal tolerance protein 11 (AHRD V3.3 *** A0A2G2WUE3_CAPBA)
Replicates 1_1	SL4.0ch08	9511452	9511652	150	SL4.0ch08:9511552	-4184	Solyc08g016796.1.1	Unknown protein
Replicates 1_1	SL4.0ch00	574802	575002	47.2	SL4.0ch00:574902	-14437	Solyc00g500013.1.1	Unknown protein
Replicates 1_1	SL4.0ch01	78510986	78511186	22	SL4.0ch01:78511086	-2175	Solyc01g094830.4.1	RING/U-box superfamily protein (AHRD V3.3 *** A0A2U1M4T4_ARTAN)
Replicates 1_1	SL4.0ch02	36605709	36605909	22	SL4.0ch02:36605809	-1781	Solyc02g068620.1.1	Pentatricopeptide repeat (AHRD V3.3 *** A0A200QE75_9MAGN)
Replicates 1_1	SL4.0ch02	44957286	44957486	22	SL4.0ch02:44957386	-4333	Solyc02g083620.3.1	Ras domain-containing protein/DUF632 domain-containing protein/DUF630 domain-containing protein (AHRD V3.11 *** tr|A0A1Q3BAN2|A0A1Q3BAN2_CEPFO)
Replicates 1_1	SL4.0ch03	2170368	2170568	22	SL4.0ch03:2170468	-322	Solyc03g007600.3.1	Pentatricopeptide repeat (PPR) superfamily protein (AHRD V3.3 *** A0A2U1LU47_ARTAN)
Replicates 1_1	SL4.0ch03	38044065	38044265	22	SL4.0ch03:38044165	-224192	Solyc03g065357.1.1	Unknown protein
Replicates 1_1	SL4.0ch04	58706932	58707132	22	SL4.0ch04:58707032	-20240	Solyc04g074810.4.1	ENTH/ANTH/VHS superfamily protein (AHRD V3.3 *** A0A2U1QGP5_ARTAN)
Replicates 1_1	SL4.0ch06	45092565	45092765	22	SL4.0ch06:45092665	-4824	Solyc06g076300.3.1	Cyclin-dependent protein kinase inhibitor SMR5 (AHRD V3.3 -** SMR5_ARATH)
Replicates 1_1	SL4.0ch10	4183280	4183480	22	SL4.0ch10:4183380	-40647	Solyc10g012090.2.1	Mechanosensitive ion channel protein 1
Replicates 1_1	SL4.0ch11	49407160	49407360	22	SL4.0ch11:49407260	-18621	Solyc11g065770.1.1	Armadillo repeat-containing protein 8-like (AHRD V3.3 *** A0A2K3NUY2_TRIPR)
Replicates 1_1	SL4.0ch12	167790	167990	22	SL4.0ch12:167890	-14510	Solyc12g005210.1.1	plant/protein (DUF1995) (AHRD V3.3 *** AT3G20680.1)
Replicates 1_1	SL4.0ch11	52600564	52600764	21.7	SL4.0ch11:52600664	-6816	Solyc11g069950.2.1	Glutaredoxin (AHRD V3.3 *** A0A118JSL8_CYNCS)
Replicates 1_1	SL4.0ch01	39995858	39996058	21.3	SL4.0ch01:39995958	-23489	Solyc01g044550.3.1	2-oxoglutarate (2OG) and Fe(II)-dependent oxygenase superfamily protein (AHRD V3.3 *-* A0A2U1N5S2_ARTAN)
Replicates 1_1	SL4.0ch01	90222734	90222934	21.2	SL4.0ch01:90222834	-12593	Solyc01g111690.3.1	transmembrane protein%2C putative (DUF1279) (AHRD V3.3 *** AT2G20940.2)
Replicates 1_1	SL4.0ch03	63671776	63671976	21.1	SL4.0ch03:63671876	-9744	Solyc03g121010.4.1	Protein PAF1-like protein (AHRD V3.3 *-* A0A2G3A3W1_CAPAN)
Replicates 1_1	SL4.0ch05	60572319	60572519	25.6	SL4.0ch05:60572419	-8086	Solyc05g050980.3.1	Transketolase (AHRD V3.11 *** tr|A0A200R9X0|A0A200R9X0_9MAGN)
Replicates 1_1	SL4.0ch04	58859678	58859878	25.2	SL4.0ch04:58859778	-9704	Solyc04g075010.1.1	Serine/threonine-protein kinase-like protein (AHRD V3.3 *** A0A2G3CNY7_CAPCH)
Replicates 1_1	SL4.0ch05	62886048	62886248	35	SL4.0ch05:62886148	-7397	Solyc05g053380.5.1	Glycosyltransferase (AHRD V3.3 *** A0A0A1WC49_NICAT)
Replicates 1_1	SL4.0ch05	1180405	1180605	24	SL4.0ch05:1180505	-10799	Solyc05g006490.4.1	Hexosyltransferase (AHRD V3.11 *** tr|A0A2G3B8F1|A0A2G3B8F1_CAPCH)
Replicates 1_1	SL4.0ch09	4614074	4614274	24	SL4.0ch09:4614174	-10984	Solyc09g011260.2.1	Mitochondrial glycoprotein (AHRD V3.3 *** A0A200QYU1_9MAGN)
Replicates 1_1	SL4.0ch03	61977924	61978124	24	SL4.0ch03:61978024	-1618	Solyc03g118660.3.1	ERAD-associated E3 ubiquitin-protein ligase component HRD3A (AHRD V3.3 *** A0A1J3CQU4_NOCCA)
Replicates 1_1	SL4.0ch06	30527720	30527920	23.7	SL4.0ch06:30527820	-30327	Solyc06g050230.4.1	Adenine/guanine permease AZG1 (AHRD V3.3 *** A0A2G2WI90_CAPBA)
Replicates 1_1	SL4.0ch01	78801615	78801815	23.6	SL4.0ch01:78801715	-2563	Solyc01g095190.2.1	RING/U-box superfamily protein (AHRD V3.3 *-* A0A178VRD3_ARATH)
Replicates 1_1	SL4.0ch06	47061194	47061394	23.4	SL4.0ch06:47061294	-446	Solyc06g084325.1.1	EID1-like F-box protein 3 (AHRD V3.3 *** A0A2G2ZF18_CAPAN)
Replicates 1_1	SL4.0ch12	2329156	2329356	19.5	SL4.0ch12:2329256	-5127	Solyc12g008980.3.1	O-acyltransferase (AHRD V3.3 *** A0A2G2X3X8_CAPBA)
Replicates 1_1	SL4.0ch00	2873084	2873284	30.5	SL4.0ch00:2873184	-54447	Solyc00g160360.1.1	Unknown protein
Replicates 1_1	SL4.0ch04	3622038	3622238	21	SL4.0ch04:3622138	-2003	Solyc04g010270.1.1	Splicing factor 3B subunit 3 (AHRD V3.3 *** A0A2G3CE29_CAPCH)
Replicates 1_1	SL4.0ch08	9481357	9481557	20.6	SL4.0ch08:9481457	-20527	Solyc08g016794.1.1	Unknown protein
Replicates 1_1	SL4.0ch00	692398	692598	68	SL4.0ch00:692498	-9048	Solyc00g500015.1.1	Unknown protein
Replicates 1_1	SL4.0ch01	1368469	1368669	18.9	SL4.0ch01:1368569	-670	Solyc01g006780.4.1	Unknown protein
Replicates 1_1	SL4.0ch00	3712924	3713124	80	SL4.0ch00:3713024	-872	Solyc00g014810.1.1	Unknown protein
Replicates 1_1	SL4.0ch00	2602063	2602263	61	SL4.0ch00:2602163	-22380	Solyc00g500158.1.1	Cytochrome b6-f complex subunit 4 (AHRD V3.3 *** A0A2G2XBM1_CAPBA)
Replicates 1_1	SL4.0ch09	640684	640884	36	SL4.0ch09:640784	-3401	Solyc09g005910.4.1	Lung seven transmembrane receptor family protein (AHRD V3.11 *** tr|A0A2U1P555|A0A2U1P555_ARTAN)
Replicates 1_1	SL4.0ch01	2369915	2370115	29	SL4.0ch01:2370015	-4803	Solyc01g008320.3.1	Shoot gravitropism 2 (SGR2) protein (AHRD V3.3 *** A0A072UJS6_MEDTR)
Replicates 1_1	SL4.0ch01	4165062	4165262	29	SL4.0ch01:4165162	-45790	Solyc01g009770.3.1	GSH-induced LITAF domain protein (AHRD V3.3 *** GILP_ARATH)
Replicates 1_1	SL4.0ch07	67384892	67385092	29	SL4.0ch07:67384992	-2451	Solyc07g065960.1.1	Chaperone protein DnaJ (AHRD V3.3 *** A0A2G3C2H4_CAPCH)
Replicates 1_1	SL4.0ch09	59052853	59053053	29	SL4.0ch09:59052953	-43678	Solyc09g065130.4.1	bHLH transcription factor 150
Replicates 1_1	SL4.0ch00	1769070	1769270	27	SL4.0ch00:1769170	-49746	Solyc00g011670.1.1	E3 ubiquitin-protein ligase (AHRD V3.11 *** tr|A0A2G3CLG0|A0A2G3CLG0_CAPCH)
Replicates 1_1	SL4.0ch03	59913722	59913922	27	SL4.0ch03:59913822	-25985	Solyc03g115860.3.1	Chlorophyll a-b binding protein
Replicates 1_1	SL4.0ch06	3454412	3454612	27	SL4.0ch06:3454512	-41054	Solyc06g009500.1.1	Pentatricopeptide repeat (AHRD V3.3 *-* A0A200QRY0_9MAGN)
Replicates 1_1	SL4.0ch06	10744211	10744411	26.9	SL4.0ch06:10744311	-145820	Solyc06g016677.1.1	Unknown protein
Replicates 1_1	SL4.0ch07	341910	342110	26	SL4.0ch07:342010	-15541	Solyc07g005440.1.1	RNA polymerase II C-terminal domain phosphatase-like 4 (AHRD V3.3 *** A0A2G2WAZ5_CAPBA)
Replicates 1_1	SL4.0ch09	4147105	4147305	34	SL4.0ch09:4147205	-55	Solyc09g010820.3.1	Myb-related protein 3R-1 (AHRD V3.3 *** A0A2G2VTL7_CAPBA)
Replicates 1_1	SL4.0ch03	54045665	54045865	19	SL4.0ch03:54045765	-9404	Solyc03g097160.4.1	Histone acetyltransferase MCC1 (AHRD V3.3 *** A0A2G3CY02_CAPCH)
Replicates 1_1	SL4.0ch05	48748600	48748800	19	SL4.0ch05:48748700	-51467	Solyc05g041110.3.1	Non-functional NADPH-dependent codeinone reductase 2 (AHRD V3.3 *-* A0A2G3A0P9_CAPAN)
Replicates 1_1	SL4.0ch07	3804316	3804516	19	SL4.0ch07:3804416	-699	Solyc07g008850.3.1	WD40 repeat (AHRD V3.3 *** A0A200PQC1_9MAGN)
Replicates 1_1	SL4.0ch08	54050135	54050335	19	SL4.0ch08:54050235	-33300	Solyc08g067070.3.1	Transducin/WD40 repeat-like superfamily protein (AHRD V3.3 *** A0A1P8BCJ2_ARATH)
Replicates 1_1	SL4.0ch08	60475901	60476101	19	SL4.0ch08:60476001	-11615	Solyc08g078570.3.1	Zinc finger protein (AHRD V3.3 *** A0A200PXY0_9MAGN)
Replicates 1_1	SL4.0ch09	66153728	66153928	19	SL4.0ch09:66153828	-1499	Solyc09g090570.2.1	Proton gradient regulation 5 (AHRD V3.3 *** A0A2U1Q6W9_ARTAN)
Replicates 1_1	SL4.0ch03	3702565	3702765	19	SL4.0ch03:3702665	-2641	Solyc03g124110.2.1	C-repeat binding factor 1
Replicates 1_1	SL4.0ch01	81192242	81192442	18.9	SL4.0ch01:81192342	-316	Solyc01g098410.4.1	Lyk13 (AHRD V3.3 *** G3KGB4_SOLLC)
Replicates 1_1	SL4.0ch04	53485489	53485689	18.8	SL4.0ch04:53485589	-9206	Solyc04g056370.3.1	Isopentenyl-diphosphate Delta-isomerase (AHRD V3.3 *** A0A2L0V4K4_9APIA)
Replicates 1_1	SL4.0ch01	78898990	78899190	18.2	SL4.0ch01:78899090	-3765	Solyc01g095330.2.1	Calcium-dependent lipid-binding (CaLB domain) family protein (AHRD V3.3 *-* Q9M148_ARATH)
Replicates 1_1	SL4.0ch00	8508452	8508652	18.1	SL4.0ch00:8508552	-6949	Solyc00g500372.1.1	Unknown protein
Replicates 1_1	SL4.0ch03	61611723	61611923	18.1	SL4.0ch03:61611823	-8023	Solyc03g118255.1.1	Magnesium-protoporphyrin IX methyltransferase (AHRD V3.11 *** tr|A0A1P8B4G1|A0A1P8B4G1_ARATH)
Replicates 1_1	SL4.0ch05	10534043	10534243	18.1	SL4.0ch05:10534143	-32478	Solyc05g015430.1.1	F-box protein (AHRD V3.11 *** tr|A0A2G2YF26|A0A2G2YF26_CAPAN)
Replicates 1_1	SL4.0ch08	9386876	9387076	42	SL4.0ch08:9386976	-27299	Solyc08g016792.1.1	Unknown protein
Replicates 1_1	SL4.0ch06	46128558	46128758	25	SL4.0ch06:46128658	-1123	Solyc06g082930.3.1	FRIGIDA-like protein (AHRD V3.3 *** A0A2G3CBV4_CAPCH)
Replicates 1_1	SL4.0ch07	66792989	66793189	25	SL4.0ch07:66793089	-2319	Solyc07g065020.3.1	Syntaxin (AHRD V3.3 *** A0A2G3C2M7_CAPCH)
Replicates 1_1	SL4.0ch07	67000901	67001101	25	SL4.0ch07:67001001	-5662	Solyc07g065410.1.1	Mitochondrial import inner membrane translocase subunit TIM50 (AHRD V3.3 *-* A0A2G3BC84_CAPCH)
Replicates 1_1	SL4.0ch10	61493815	61494015	25	SL4.0ch10:61493915	-11274	Solyc10g081280.2.1	Protein DETOXIFICATION (AHRD V3.3 *** A0A2G3BHA5_CAPCH)
Replicates 1_1	SL4.0ch11	53909718	53909918	25	SL4.0ch11:53909818	-6303	Solyc11g072623.1.1	Unknown protein
Replicates 1_1	SL4.0ch03	57396359	57396559	24.9	SL4.0ch03:57396459	-23602	Solyc03g112600.4.1	Receptor protein kinase
Replicates 1_1	SL4.0ch04	62182338	62182538	24.4	SL4.0ch04:62182438	-20358	Solyc04g079860.1.1	Metalloendopeptidase / zinc ion binding protein (AHRD V3.3 *** F4K306_ARATH)
Replicates 1_1	SL4.0ch01	6167417	6167617	18	SL4.0ch01:6167517	-86256	Solyc01g010820.3.1	Cullin (AHRD V3.3 *** A0A2U1PKA1_ARTAN)
Replicates 1_1	SL4.0ch01	1548723	1548923	21	SL4.0ch01:1548823	-2105	Solyc01g006960.3.1	RNA helicase family protein (AHRD V3.3 *** A0A2U1PBZ9_ARTAN)
Replicates 1_1	SL4.0ch02	50947948	50948148	21	SL4.0ch02:50948048	-665	Solyc02g091665.1.1	Octicosapeptide/Phox/Bem1p family protein (AHRD V3.3 *-* A0A1P8BCE3_ARATH)
Replicates 1_1	SL4.0ch03	352774	352974	21	SL4.0ch03:352874	-17473	Solyc03g005470.3.1	Unknown protein
Replicates 1_1	SL4.0ch04	2238759	2238959	21	SL4.0ch04:2238859	-18698	Solyc04g008580.3.1	Histone acetyltransferase HAC12 (AHRD V3.11 *** tr|A0A2G2X9A5|A0A2G2X9A5_CAPBA)
Replicates 1_1	SL4.0ch04	58467989	58468189	21	SL4.0ch04:58468089	-10047	Solyc04g074500.3.1	VQ motif-containing protein 9 (AHRD V3.3 *** A0A2I4DH74_9ROSI)
Replicates 1_1	SL4.0ch05	18952163	18952363	21	SL4.0ch05:18952263	-133135	Solyc05g017870.2.1	Histone-lysine N-methyltransferase ATXR2 (AHRD V3.11 *-* tr|A0A2G2Z378|A0A2G2Z378_CAPAN)
Replicates 1_1	SL4.0ch05	60597220	60597420	21	SL4.0ch05:60597320	-7875	Solyc05g051010.4.1	40S ribosomal protein S13 (AHRD V3.3 *** A0A2I0X2R1_9ASPA)
Replicates 1_1	SL4.0ch06	30312106	30312306	21	SL4.0ch06:30312206	-2992	Solyc06g050160.4.1	Homeobox-leucine zipper protein HDG1 (AHRD V3.3 *** A0A2I0VKD9_9ASPA)
Replicates 1_1	SL4.0ch06	41480413	41480613	21	SL4.0ch06:41480513	-12709	Solyc06g071240.3.1	Transcription factor MYB1R1 (AHRD V3.3 *** MY1R1_SOLTU)
Replicates 1_1	SL4.0ch08	5464340	5464540	21	SL4.0ch08:5464440	-14040	Solyc08g015755.2.1	F-box family protein (AHRD V3.3 *** I0J3G4_ARAHH)
Replicates 1_1	SL4.0ch08	40555449	40555649	21	SL4.0ch08:40555549	-273744	Solyc08g028700.2.1	Unknown protein
Replicates 1_1	SL4.0ch08	53192013	53192213	21	SL4.0ch08:53192113	-15084	Solyc08g066460.4.1	DUF1677 family protein (DUF1677) (AHRD V3.3 *** Q8GW85_ARATH)
Replicates 1_1	SL4.0ch11	7758349	7758549	21	SL4.0ch11:7758449	-13280	Solyc11g160240.1.1	Protein-tyrosine-phosphatase PTP1 (AHRD V3.3 *** A0A2G3CM37_CAPCH)
Replicates 1_1	SL4.0ch11	48226946	48227146	21	SL4.0ch11:48227046	-48027	Solyc11g064920.2.1	hypoxia-induced protein L31
Replicates 1_1	SL4.0ch11	53940941	53941141	21	SL4.0ch11:53941041	-4687	Solyc11g072640.3.1	Zinc-binding dehydrogenase (AHRD V3.3 *** A0A162PTR1_9PEZI)
Replicates 1_1	SL4.0ch02	48780543	48780743	20.9	SL4.0ch02:48780643	-4291	Solyc02g088750.2.1	50S ribosomal protein L7/L12 (AHRD V3.3 *** A0A1U8GY39_CAPAN)
Replicates 1_1	SL4.0ch12	65687842	65688042	20.7	SL4.0ch12:65687942	-29662	Solyc12g098810.2.1	Unknown protein
Replicates 1_1	SL4.0ch08	61782048	61782248	20.2	SL4.0ch08:61782148	-4085	Solyc08g080380.4.1	Acetylornithine aminotransferase
Replicates 1_1	SL4.0ch01	85846751	85846951	23	SL4.0ch01:85846851	-4240	Solyc01g105330.3.1	Chaperone protein DnaJ (AHRD V3.3 *** A0A2G2VAL8_CAPBA)
Replicates 1_1	SL4.0ch04	63850931	63851131	23	SL4.0ch04:63851031	-15695	Solyc04g082080.1.1	Alpha-amylase (AHRD V3.3 *** K4BVT6_SOLLC)
Replicates 1_1	SL4.0ch06	7916443	7916643	23	SL4.0ch06:7916543	-84896	Solyc06g011500.3.1	Unknown protein
Replicates 1_1	SL4.0ch06	44343495	44343695	23	SL4.0ch06:44343595	-9249	Solyc06g075200.1.1	Fasciclin-like arabinogalactan protein 11 (AHRD V3.3 *** A0A2G2V1G2_CAPBA)
Replicates 1_1	SL4.0ch09	13674259	13674459	23	SL4.0ch09:13674359	-14879	Solyc09g018220.3.1	RING-type E3 ubiquitin transferase (AHRD V3.3 *** A0A2G3C1I1_CAPCH)
Replicates 1_1	SL4.0ch10	47436926	47437126	23	SL4.0ch10:47437026	-240888	Solyc10g050227.1.1	ATP-dependent DNA helicase (AHRD V3.11 *-* tr|K3YXY4|K3YXY4_SETIT)
Replicates 1_1	SL4.0ch11	4768840	4769040	23	SL4.0ch11:4768940	-1697	Solyc11g011730.1.1	Auxin-responsive protein SAUR65 (AHRD V3.3 *** A0A2G3B0T7_CAPCH)
Replicates 1_1	SL4.0ch11	25572383	25572583	23	SL4.0ch11:25572483	-60522	Solyc11g033260.2.1	MAP kinase kinase kinase 82
Replicates 1_1	SL4.0ch12	1542163	1542363	23	SL4.0ch12:1542263	-10814	Solyc12g007080.2.1	thermosome subunit gamma (AHRD V3.3 *** AT5G19540.2)
Replicates 1_1	SL4.0ch06	42074972	42075172	22.9	SL4.0ch06:42075072	-3704	Solyc06g072060.1.1	CBS domain containing protein (AHRD V3.3 *** B6U1W0_MAIZE)
Replicates 1_1	SL4.0ch07	63229932	63230132	22.7	SL4.0ch07:63230032	-13801	Solyc07g055215.1.1	SlSK
Replicates 1_1	SL4.0ch09	63253127	63253327	22.7	SL4.0ch09:63253227	-18662	Solyc09g075280.2.1	RING-H2 finger protein ATL5-like (AHRD V3.3 *** A0A2I4EZH4_9ROSI)
Replicates 1_1	SL4.0ch08	61698568	61698768	22.4	SL4.0ch08:61698668	-9940	Solyc08g080270.3.1	hypothetical protein (AHRD V3.3 *-* AT4G23020.2)
Replicates 1_1	SL4.0ch05	23614191	23614391	22.4	SL4.0ch05:23614291	-329346	Solyc05g018810.5.1	RING/U-box superfamily protein (AHRD V3.3 *-* Q3EAE6_ARATH)
Replicates 1_1	SL4.0ch07	13582962	13583162	31.5	SL4.0ch07:13583062	-18123	Solyc07g020790.4.1	Unknown protein
Replicates 1_1	SL4.0ch00	6818051	6818251	69	SL4.0ch00:6818151	-44910	Solyc00g500290.2.1	Unknown protein
Replicates 1_1	SL4.0ch06	40489890	40490090	29.9	SL4.0ch06:40489990	-12837	Solyc06g069070.1.1	Unknown protein
Replicates 1_1	SL4.0ch00	7887567	7887767	29.4	SL4.0ch00:7887667	-85267	Solyc00g500355.1.1	Polyadenylate-binding protein RBP47B (AHRD V3.11 *-* tr|A0A2G3BE08|A0A2G3BE08_CAPCH)
Replicates 1_1	SL4.0ch00	9253089	9253289	51.6	SL4.0ch00:9253189	-728	Solyc00g500402.1.1	Unknown protein
Replicates 1_1	SL4.0ch00	1625067	1625267	48.6	SL4.0ch00:1625167	-36184	Solyc00g500088.2.1	Unknown protein
Replicates 1_1	SL4.0ch04	49613865	49614065	18	SL4.0ch04:49613965	-24351	Solyc04g051350.3.1	Protein LIKE COV 2 (AHRD V3.3 *** A0A2G2Y741_CAPAN)
Replicates 1_1	SL4.0ch05	47107370	47107570	19	SL4.0ch05:47107470	-853107	Solyc05g031600.3.1	Unknown protein
Replicates 1_1	SL4.0ch01	61158785	61158985	28	SL4.0ch01:61158885	-16284	Solyc01g058705.1.1	Calcium-binding EF-hand (AHRD V3.3 *** A0A2U1NQC6_ARTAN)
Replicates 1_1	SL4.0ch06	46438023	46438223	28	SL4.0ch06:46438123	-2675	Solyc06g083460.4.1	NAD(P)-binding Rossmann-fold superfamily protein (AHRD V3.11 *** tr|F4IKL5|F4IKL5_ARATH)
Replicates 1_1	SL4.0ch01	74193023	74193223	27.6	SL4.0ch01:74193123	-11254	Solyc01g087005.1.1	Unknown protein
Replicates 1_1	SL4.0ch01	87821099	87821299	18	SL4.0ch01:87821199	-11815	Solyc01g108160.3.1	Zinc-binding alcohol dehydrogenase domain-containing protein 2 (AHRD V3.3 *** A0A1J3FLM3_NOCCA)
Replicates 1_1	SL4.0ch05	2255656	2255856	23.3	SL4.0ch05:2255756	-1233	Solyc05g007740.3.1	Mitochondrial carrier protein (AHRD V3.3 *** A0A200QP40_9MAGN)
Replicates 1_1	SL4.0ch07	66886434	66886634	18	SL4.0ch07:66886534	-7463	Solyc07g065170.3.1	Heavy metal-associated isoprenylated plant protein (AHRD V3.3 *-* A0A2R6RV38_ACTCH)
Replicates 1_1	SL4.0ch00	9487963	9488163	33	SL4.0ch00:9488063	-36947	Solyc00g500407.1.1	Gag/pol polyprotein (AHRD V3.11 *-* tr|Q6WAY7|Q6WAY7_PEA)
Replicates 1_1	SL4.0ch03	2737746	2737946	26	SL4.0ch03:2737846	-20920	Solyc03g025350.3.1	Sec-independent protein translocase protein TATB
Replicates 1_1	SL4.0ch05	64378358	64378558	26	SL4.0ch05:64378458	-2970	Solyc05g055310.3.1	Protein YIPF (AHRD V3.3 *** A0A1U8EX52_CAPAN)
Replicates 1_1	SL4.0ch10	91151	91351	26	SL4.0ch10:91251	-1174	Solyc10g005270.1.1	CDP-diacylglycerol--glycerol-3-phosphate 3-phosphatidyltransferase/cardiolipin synthase (AHRD V3.11 *-* tr|A0A2N0I349|A0A2N0I349_9SPHN)
Replicates 1_1	SL4.0ch06	32765110	32765310	25.8	SL4.0ch06:32765210	-19591	Solyc06g051525.1.1	CTD small phosphatase-like protein (AHRD V3.3 *** A0A1J3JJA1_NOCCA)
Replicates 1_1	SL4.0ch06	1885332	1885532	18.9	SL4.0ch06:1885432	-8470	Solyc06g008010.3.1	bHLH transcription factor 041
Replicates 1_1	SL4.0ch11	17775828	17776028	22	SL4.0ch11:17775928	-6898	Solyc11g051176.1.1	Unknown protein
Replicates 1_1	SL4.0ch04	2513447	2513647	24	SL4.0ch04:2513547	-6424	Solyc04g008870.3.1	Protein arginine N-methyltransferase (AHRD V3.11 *** tr|A0A2U1N672|A0A2U1N672_ARTAN)
Replicates 1_1	SL4.0ch04	51392507	51392707	24	SL4.0ch04:51392607	-33068	Solyc04g054250.4.1	Cytochrome (AHRD V3.3 *** A0A2G2Y725_CAPAN)
Replicates 1_1	SL4.0ch10	769862	770062	24	SL4.0ch10:769962	-19047	Solyc10g006130.1.1	Unknown protein
Replicates 1_1	SL4.0ch02	41026462	41026662	23.9	SL4.0ch02:41026562	-6651	Solyc02g078285.1.1	DNA ligase-like protein (AHRD V3.3 *** AT2G33793.2)
Replicates 1_1	SL4.0ch08	48100045	48100245	23.8	SL4.0ch08:48100145	-93864	Solyc08g161440.1.1	Cytokinin oxidase/dehydrogenase (AHRD V3.3 *** C3VPM8_SOLTU)
Replicates 1_1	SL4.0ch00	7744100	7744300	23	SL4.0ch00:7744200	-42133	Solyc00g032030.2.1	E3 ubiquitin-protein ligase (AHRD V3.11 *** tr|A0A2G2WYW6|A0A2G2WYW6_CAPBA)
Replicates 1_1	SL4.0ch03	49479145	49479345	31	SL4.0ch03:49479245	-16679	Solyc03g093540.1.1	Ethylene-responsive transcription factor 5 (AHRD V3.3 *** A0A2G3CVP7_CAPCH)
Replicates 1_1	SL4.0ch04	52905569	52905769	31	SL4.0ch04:52905669	-23675	Solyc04g055060.3.1	VQ motif-containing protein (AHRD V3.3 *-* Q9C8B9_ARATH)
Replicates 1_1	SL4.0ch12	66135961	66136161	31	SL4.0ch12:66136061	-482	Solyc12g099460.1.1	Unknown protein
Replicates 1_1	SL4.0ch03	383564	383764	18	SL4.0ch03:383664	-4266	Solyc03g005500.1.1	RING/U-box superfamily protein (AHRD V3.3 *** A0A2U1Q188_ARTAN)
Replicates 1_1	SL4.0ch03	426778	426978	18	SL4.0ch03:426878	-13378	Solyc03g005550.3.1	Seed storage protein (AHRD V3.3 *** Q2TPW5_9ROSI)
Replicates 1_1	SL4.0ch03	36554552	36554752	18	SL4.0ch03:36554652	-544238	Solyc03g160330.1.1	Protein ENHANCED DISEASE RESISTANCE 2-like (AHRD V3.3 *** A0A1J3E5X3_NOCCA)
Replicates 1_1	SL4.0ch04	18997045	18997245	18	SL4.0ch04:18997145	-67911	Solyc04g160600.1.1	Pectate lyase (AHRD V3.11 *-* tr|A0A2G3B368|A0A2G3B368_CAPCH)
Replicates 1_1	SL4.0ch04	59191494	59191694	18	SL4.0ch04:59191594	-5514	Solyc04g076250.3.1	DnaJ domain-containing protein (AHRD V3.3 *** A0A1Q3BFQ6_CEPFO)
Replicates 1_1	SL4.0ch06	42201335	42201535	18	SL4.0ch06:42201435	-4537	Solyc00g090430.3.1	DUF789 domain-containing protein (AHRD V3.11 *** tr|A0A1Q3BTC9|A0A1Q3BTC9_CEPFO)
Replicates 1_1	SL4.0ch10	33038744	33038944	18	SL4.0ch10:33038844	-97492	Solyc10g045490.2.1	Pheromone receptor-like protein (AHRD V3.3 *** G7J5T8_MEDTR)
Replicates 1_1	SL4.0ch10	40435678	40435878	18	SL4.0ch10:40435778	-11208	Solyc10g047580.1.1	exopolygalacturonase-like (AHRD V3.3 *-* XP_025888966.1)
Replicates 1_1	SL4.0ch10	63237914	63238114	21.8	SL4.0ch10:63238014	-1221	Solyc10g084630.2.1	N-acetyltransferase (AHRD V3.3 *** B6T916_MAIZE)
Replicates 1_1	SL4.0ch12	60666686	60666886	21.6	SL4.0ch12:60666786	-43028	Solyc12g049430.1.1	Nuclear pore complex protein (AHRD V3.3 *** A0A2G2XYI0_CAPAN)
Replicates 1_1	SL4.0ch06	43007632	43007832	21.4	SL4.0ch06:43007732	-22282	Solyc06g073520.3.1	La-related protein 1 (AHRD V3.3 *** A0A2G3CAE9_CAPCH)
Replicates 1_1	SL4.0ch11	52600787	52600987	21.3	SL4.0ch11:52600887	-6593	Solyc11g069950.2.1	Glutaredoxin (AHRD V3.3 *** A0A118JSL8_CYNCS)
Replicates 1_1	SL4.0ch01	80779417	80779617	20	SL4.0ch01:80779517	-3370	Solyc01g097820.5.1	zeta-carotene desaturase
Replicates 1_1	SL4.0ch04	61495313	61495513	20	SL4.0ch04:61495413	-5905	Solyc04g078860.4.1	defective chloroplasts and leaves
Replicates 1_1	SL4.0ch05	4113285	4113485	20	SL4.0ch05:4113385	-1028	Solyc05g009840.3.1	GC-rich sequence DNA-binding factor (AHRD V3.3 *** A0A200R9S4_9MAGN)
Replicates 1_1	SL4.0ch05	63794863	63795063	20	SL4.0ch05:63794963	-3818	Solyc05g054480.3.1	3-oxo-5-alpha-steroid 4-dehydrogenase (AHRD V3.3 *** A0A200R6L0_9MAGN)
Replicates 1_1	SL4.0ch09	50311693	50311893	20	SL4.0ch09:50311793	-28908	Solyc09g059300.1.1	Hexosyltransferase (AHRD V3.3 *-* A0A2I4H1Z6_9ROSI)
Replicates 1_1	SL4.0ch10	34466155	34466355	20	SL4.0ch10:34466255	-43337	Solyc10g161030.1.1	gibberellin 20 oxidase 1-like (AHRD V3.11 --* NP_001289515.1)
Replicates 1_1	SL4.0ch11	3328205	3328405	20	SL4.0ch11:3328305	-7401	Solyc11g010230.2.1	protein SCAI (AHRD V3.3 *** A0A2I4GV29_9ROSI)
Replicates 1_1	SL4.0ch11	4944335	4944535	20	SL4.0ch11:4944435	-7301	Solyc11g162040.1.1	protein FAR1-RELATED SEQUENCE 5 (AHRD V3.11 --* XP_014757844.2)
Replicates 1_1	SL4.0ch08	60770136	60770336	19.9	SL4.0ch08:60770236	-10336	Solyc08g078990.3.1	C2H2-like zinc finger protein (AHRD V3.3 *-* A0A2U1KP34_ARTAN)
Replicates 1_1	SL4.0ch03	64461666	64461866	19.7	SL4.0ch03:64461766	-6944	Solyc03g122040.4.1	Trihelix transcription factor ASIL2 (AHRD V3.3 *-* ASIL2_ARATH)
Replicates 1_1	SL4.0ch10	20691619	20691819	19.6	SL4.0ch10:20691719	-56374	Solyc10g150113.1.1	DUF1639 domain-containing protein (AHRD V3.3 *-* A0A1Q3BZV8_CEPFO)
Replicates 1_1	SL4.0ch08	61927204	61927404	19.4	SL4.0ch08:61927304	-4311	Solyc08g080530.1.1	Heat stress transcription factor B-2b (AHRD V3.3 *** A0A2G3DB98_CAPCH)
Replicates 1_1	SL4.0ch10	96688	96888	19.4	SL4.0ch10:96788	-978	Solyc10g005300.3.1	CDP-diacylglycerol--glycerol-3-phosphate 3-phosphatidyltransferase/cardiolipin synthase (AHRD V3.11 *-* tr|A0A2N0I349|A0A2N0I349_9SPHN)
Replicates 1_1	SL4.0ch07	61680543	61680743	19.4	SL4.0ch07:61680643	-13027	Solyc07g053290.3.1	Ketol-acid reductoisomerase (AHRD V3.3 *** K4CFM5_SOLLC)
Replicates 1_1	SL4.0ch00	691140	691340	92	SL4.0ch00:691240	-10306	Solyc00g500015.1.1	Unknown protein
Replicates 1_1	SL4.0ch07	65621895	65622095	34	SL4.0ch07:65621995	-9235	Solyc07g063300.3.1	Nucleolar GTP-binding protein 2 (AHRD V3.3 *** A0A0H5RA30_9EUKA)
Replicates 1_1	SL4.0ch00	7901531	7901731	29	SL4.0ch00:7901631	-71303	Solyc00g500355.1.1	Polyadenylate-binding protein RBP47B (AHRD V3.11 *-* tr|A0A2G3BE08|A0A2G3BE08_CAPCH)
Replicates 1_1	SL4.0ch04	55890782	55890982	28.2	SL4.0ch04:55890882	-7226	Solyc04g071150.3.1	Basic-leucine zipper (BZIP) transcription factor family protein (AHRD V3.3 *-* Q8H1F0_ARATH)
Replicates 1_1	SL4.0ch03	11854944	11855144	18	SL4.0ch03:11855044	-30244	Solyc03g046430.1.1	Unknown protein
Replicates 1_1	SL4.0ch00	6805549	6805749	39.9	SL4.0ch00:6805649	-57412	Solyc00g500290.2.1	Unknown protein
Replicates 1_1	SL4.0ch05	61864948	61865148	27	SL4.0ch05:61865048	-2215	Solyc05g052200.4.1	Transcription elongation factor TFIIS (AHRD V3.3 *** A0A2G2ZJJ8_CAPAN)
Replicates 1_1	SL4.0ch08	57508357	57508557	27	SL4.0ch08:57508457	-6797	Solyc08g075310.4.1	Protein decapping 5 (AHRD V3.3 *-* A0A2G3B6L4_CAPCH)
Replicates 1_1	SL4.0ch11	50566347	50566547	27	SL4.0ch11:50566447	-7501	Solyc11g066770.3.1	protein RETICULATA
Replicates 1_1	SL4.0ch05	22472952	22473152	32	SL4.0ch05:22473052	-64165	Solyc05g018590.3.1	Actin-related protein 6 (AHRD V3.3 *** A0A1U8GPF8_CAPAN)
Replicates 1_1	SL4.0ch09	2321667	2321867	32	SL4.0ch09:2321767	-12775	Solyc09g098620.2.1	leucine-rich repeat receptor-like protein kinase PXC1 (AHRD V3.11 *** tr|A0A1S4B9J1|A0A1S4B9J1_TOBAC)
Replicates 1_1	SL4.0ch12	1561806	1562006	32	SL4.0ch12:1561906	-14368	Solyc12g007100.2.1	Signal peptidase I (AHRD V3.3 *** B2J5A2_NOSP7)
Replicates 1_1	SL4.0ch06	43692484	43692684	31.1	SL4.0ch06:43692584	-9157	Solyc06g074410.4.1	Proteinaceous RNase P 2 (AHRD V3.3 *** A0A1U8H3H4_CAPAN)
Replicates 1_1	SL4.0ch00	716288	716488	31	SL4.0ch00:716388	-183627	Solyc02g010630.2.1	Unknown protein
Replicates 1_1	SL4.0ch03	61361734	61361934	18	SL4.0ch03:61361834	-8587	Solyc03g117940.3.1	FRIGIDA-like protein (AHRD V3.11 *** tr|A0A2G3A2S4|A0A2G3A2S4_CAPAN)
Replicates 1_1	SL4.0ch04	59237350	59237550	25	SL4.0ch04:59237450	-1318	Solyc04g076330.3.1	Argininosuccinate lyase (AHRD V3.11 *** tr|A0A2G3CP16|A0A2G3CP16_CAPCH)
Replicates 1_1	SL4.0ch05	63525215	63525415	25	SL4.0ch05:63525315	-12272	Solyc05g054200.4.1	OBERON-like protein (AHRD V3.3 *** PVIP_NICBE)
Replicates 1_1	SL4.0ch10	64120557	64120757	25	SL4.0ch10:64120657	-949	Solyc10g085980.2.1	Protein MODIFIER OF SNC1 11 (AHRD V3.3 *** A0A2G2YLK2_CAPAN)
Replicates 1_1	SL4.0ch00	2667012	2667212	24.8	SL4.0ch00:2667112	-87329	Solyc00g500158.1.1	Unknown protein
Replicates 1_1	SL4.0ch04	3758751	3758951	24.7	SL4.0ch04:3758851	-1807	Solyc04g011330.1.1	Unknown protein
Replicates 1_1	SL4.0ch06	39884220	39884420	24.4	SL4.0ch06:39884320	-993	Solyc06g068190.2.1	Ubiquitin system component Cue protein (AHRD V3.3 --* AT5G32440.3)
Replicates 1_1	SL4.0ch04	55378169	55378369	24.3	SL4.0ch04:55378269	-3165	Solyc04g064870.3.1	MADS-box transcription factor 23 (AHRD V3.3 *** A0A2G2Y5S9_CAPAN)
Replicates 1_1	SL4.0ch00	3421146	3421346	35	SL4.0ch00:3421246	-59070	Solyc00g500177.1.1	Unknown protein
Replicates 1_1	SL4.0ch08	9524278	9524478	80	SL4.0ch08:9524378	-45326	Solyc08g150111.1.1	Unknown protein
Replicates 1_1	SL4.0ch00	3515217	3515417	46.8	SL4.0ch00:3515317	-5525	Solyc00g500178.1.1	Unknown protein
Replicates 1_1	SL4.0ch09	902827	903027	29.8	SL4.0ch09:902927	-2167	Solyc09g007290.4.1	Leucine-rich repeat protein kinase family protein (AHRD V3.3 *** A0A2U1Q5J5_ARTAN)
Replicates 1_1	SL4.0ch02	41006506	41006706	29.8	SL4.0ch02:41006606	-23958	Solyc02g078250.4.1	DNA ligase-like protein (AHRD V3.3 *** AT2G33793.2)
Replicates 1_1	SL4.0ch01	79042113	79042313	29.7	SL4.0ch01:79042213	-10956	Solyc01g095540.3.1	Mitochondrial carrier protein (AHRD V3.3 *** A0A200PUN8_9MAGN)
Replicates 1_1	SL4.0ch00	9202624	9202824	29.5	SL4.0ch00:9202724	-7690	Solyc00g500398.1.1	Unknown protein
Replicates 1_1	SL4.0ch06	36521915	36522115	29.5	SL4.0ch06:36522015	-7642	Solyc06g060810.3.1	Homeobox-leucine zipper protein HAT2 (AHRD V3.3 *** A0A2G2WJU4_CAPBA)
Replicates 1_1	SL4.0ch08	437876	438076	29.1	SL4.0ch08:437976	-13684	Solyc08g005580.3.1	Root UVB sensitive family (AHRD V3.11 *** tr|A0A2U1QLM3|A0A2U1QLM3_ARTAN)
Replicates 1_1	SL4.0ch01	1811805	1812005	23	SL4.0ch01:1811905	-1963	Solyc01g007240.3.1	Late embryogenesis abundant (LEA) hydroxyproline-rich glycoprotein family (AHRD V3.3 *** O82294_ARATH)
Replicates 1_1	SL4.0ch04	7356944	7357144	23	SL4.0ch04:7357044	-6554	Solyc04g016480.3.1	Purple acid phosphatase 16 (AHRD V3.3 *** A0A2U1NPL5_ARTAN)
Replicates 1_1	SL4.0ch04	15201935	15202135	23	SL4.0ch04:15202035	-172721	Solyc04g028460.1.1	DNA ligase-like protein%2C putative (DUF1645) (AHRD V3.3 *-* AT1G70420.1)
Replicates 1_1	SL4.0ch11	49817988	49818188	23	SL4.0ch11:49818088	-6398	Solyc11g162050.1.1	Heat shock protein 70 (AHRD V3.3 *** S8C6K2_9LAMI)
Replicates 1_1	SL4.0ch11	53307210	53307410	23	SL4.0ch11:53307310	-13756	Solyc11g071890.3.1	Serine/threonine-protein phosphatase (AHRD V3.3 *** A0A2G2VPQ2_CAPBA)
Replicates 1_1	SL4.0ch12	57452494	57452694	22.7	SL4.0ch12:57452594	-32702	Solyc12g042505.1.1	Gibberellin-regulated family protein (AHRD V3.3 *** A0A2U1P8W2_ARTAN)
Replicates 1_1	SL4.0ch06	10650175	10650375	22.6	SL4.0ch06:10650275	-39012	Solyc06g016680.1.1	Unknown protein
Replicates 1_1	SL4.0ch04	57803709	57803909	18	SL4.0ch04:57803809	-5593	Solyc04g072900.1.1	dehydration-responsive element binding protein 3
Replicates 1_1	SL4.0ch10	48149064	48149264	18	SL4.0ch10:48149164	-31785	Solyc10g160480.1.1	ATP-dependent DNA helicase (AHRD V3.11 *-* tr|A0A2G3C4E5|A0A2G3C4E5_CAPCH)
Replicates 1_1	SL4.0ch03	45985355	45985555	33	SL4.0ch03:45985455	-689	Solyc03g078780.3.1	UDP-glycosyltransferase 76C4-like (AHRD V3.3 *** A0A2I4EQP1_9ROSI)
Replicates 1_1	SL4.0ch08	9567404	9567604	57.3	SL4.0ch08:9567504	-2200	Solyc08g150111.1.1	Unknown protein
Replicates 1_1	SL4.0ch02	47677435	47677635	21	SL4.0ch02:47677535	-9285	Solyc02g087210.3.1	Peroxidase (AHRD V3.3 *** K4BBM6_SOLLC)
Replicates 1_1	SL4.0ch03	14499992	14500192	21	SL4.0ch03:14500092	-329800	Solyc03g071540.1.1	Unknown protein
Replicates 1_1	SL4.0ch03	63017917	63018117	21	SL4.0ch03:63018017	-14210	Solyc03g120090.1.1	periodic tryptophan protein 2 homolog (AHRD V3.3 *** A0A2I4EVX9_9ROSI)
Replicates 1_1	SL4.0ch04	57809884	57810084	21	SL4.0ch04:57809984	-38146	Solyc04g072870.2.1	dehydration-responsive element binding protein 3
Replicates 1_1	SL4.0ch06	46241448	46241648	21	SL4.0ch06:46241548	-6012	Solyc06g083110.2.1	Unknown protein
Replicates 1_1	SL4.0ch08	9371078	9371278	21	SL4.0ch08:9371178	-43097	Solyc08g016792.1.1	Unknown protein
Replicates 1_1	SL4.0ch10	3007819	3008019	21	SL4.0ch10:3007919	-17113	Solyc10g009090.3.1	ethylene response factor F.5
Replicates 1_1	SL4.0ch12	65533626	65533826	21	SL4.0ch12:65533726	-8424	Solyc12g098510.1.1	Heat stress transcription factor A-5 (AHRD V3.3 *** A0A2G3AV96_CAPCH)
Replicates 1_1	SL4.0ch10	62049704	62049904	21	SL4.0ch10:62049804	-3472	Solyc10g082040.2.1	ovate family protein 21
Replicates 1_1	SL4.0ch10	61818634	61818834	20.7	SL4.0ch10:61818734	-5200	Solyc10g081690.1.1	hypothetical protein (AHRD V3.3 *-* AT2G27180.1)
Replicates 1_1	SL4.0ch00	7887276	7887476	20.6	SL4.0ch00:7887376	-85558	Solyc00g500355.1.1	Polyadenylate-binding protein RBP47B (AHRD V3.11 *-* tr|A0A2G3BE08|A0A2G3BE08_CAPCH)
Replicates 1_1	SL4.0ch06	42172326	42172526	20.6	SL4.0ch06:42172426	-2589	Solyc06g072230.1.1	miraculin-like (AHRD V3.3 *** A0A2I4HMC5_9ROSI)
Replicates 1_1	SL4.0ch02	37130320	37130520	20	SL4.0ch02:37130420	-20759	Solyc02g069180.4.1	Transcription initiation factor TFIID subunit 8 (AHRD V3.3 *** A0A1J3F703_NOCCA)
Replicates 1_1	SL4.0ch00	1637256	1637456	63	SL4.0ch00:1637356	-48373	Solyc00g500088.2.1	Unknown protein
Replicates 1_1	SL4.0ch01	85505181	85505381	19	SL4.0ch01:85505281	-23423	Solyc01g104840.4.1	Phosphatidylserine decarboxylase proenzyme 2 (AHRD V3.3 *** A0A2G3AWK6_CAPCH)
Replicates 1_1	SL4.0ch02	11813873	11814073	19	SL4.0ch02:11813973	-42779	Solyc02g161480.1.1	O-fucosyltransferase 3-like isoform X5 (AHRD V3.11 *-* XP_025885621.1)
Replicates 1_1	SL4.0ch03	2604933	2605133	19	SL4.0ch03:2605033	-12855	Solyc03g025160.4.1	Unknown protein
Replicates 1_1	SL4.0ch03	36353521	36353721	19	SL4.0ch03:36353621	-65671	Solyc03g065200.4.1	Protein phosphatase 2C (PP2C)-like domain (AHRD V3.3 *-* A0A200Q711_9MAGN)
Replicates 1_1	SL4.0ch03	55897564	55897764	19	SL4.0ch03:55897664	-18943	Solyc03g019690.1.1	Gamma carbonic anhydrase-like 2
Replicates 1_1	SL4.0ch03	62186329	62186529	19	SL4.0ch03:62186429	-1250	Solyc03g119020.2.1	Pre-mRNA-splicing factor SPF27-like protein (AHRD V3.11 *** tr|A0A2G3CZW4|A0A2G3CZW4_CAPCH)
Replicates 1_1	SL4.0ch05	21061449	21061649	19	SL4.0ch05:21061549	-70366	Solyc05g018440.1.1	Unknown protein
Replicates 1_1	SL4.0ch09	4997005	4997205	19	SL4.0ch09:4997105	-9502	Solyc09g011680.1.1	Ethylene receptor (AHRD V3.3 *-* A0A2G2WUD6_CAPBA)
Replicates 1_1	SL4.0ch09	14364229	14364429	19	SL4.0ch09:14364329	-58780	Solyc09g160530.1.1	DUF4219 domain-containing protein/UBN2 domain-containing protein (AHRD V3.11 *** tr|A0A1Q3AZZ9|A0A1Q3AZZ9_CEPFO)
Replicates 1_1	SL4.0ch09	63605079	63605279	19	SL4.0ch09:63605179	-13342	Solyc09g075780.2.1	Long-chain acyl-CoA synthetase 6 (AHRD V3.3 *** A0A2U1MVC5_ARTAN)
Replicates 1_1	SL4.0ch10	513496	513696	19	SL4.0ch10:513596	-2274	Solyc10g005790.3.1	ER membrane protein complex subunit 8/9-like protein (AHRD V3.11 *** tr|A0A1U8HGZ8|A0A1U8HGZ8_CAPAN)
Replicates 1_1	SL4.0ch10	57443109	57443309	19	SL4.0ch10:57443209	-80500	Solyc10g074785.1.1	Unknown protein
Replicates 1_1	SL4.0ch12	13299681	13299881	19	SL4.0ch12:13299781	-175850	Solyc12g020020.1.1	MP domain-containing protein (AHRD V3.3 *** A0A1Q3CAI9_CEPFO)
Replicates 1_1	SL4.0ch12	42433221	42433421	19	SL4.0ch12:42433321	-580907	Solyc12g035670.3.1	Nuclear pore complex protein NUP54 (AHRD V3.3 *** A0A1U8GNX0_CAPAN)
Replicates 1_1	SL4.0ch03	64358026	64358226	19	SL4.0ch03:64358126	-7886	Solyc03g121920.3.1	Hydroxyproline-rich glycoprotein family protein (AHRD V3.3 *-* Q9CAJ1_ARATH)
Replicates 1_1	SL4.0ch01	29566226	29566426	18.9	SL4.0ch01:29566326	-94872	Solyc01g020370.2.1	CTP synthase (AHRD V3.11 *-* tr|A0A218X1H7|A0A218X1H7_PUNGR)
Replicates 1_1	SL4.0ch04	59913659	59913859	18.9	SL4.0ch04:59913759	-12959	Solyc04g076960.4.1	Transcription factor (AHRD V3.3 *** A0A2U1NHT6_ARTAN)
Replicates 1_1	SL4.0ch04	53385168	53385368	18.9	SL4.0ch04:53385268	-22818	Solyc04g056340.4.1	Zinc finger
Replicates 1_1	SL4.0ch02	28060861	28061061	18.8	SL4.0ch02:28060961	-9371	Solyc02g032930.3.1	glycine rich protein precursor (AHRD V3.3 *-* NP_001233996.1)
Replicates 1_1	SL4.0ch11	52943022	52943222	18.6	SL4.0ch11:52943122	-2401	Solyc11g071360.1.1	Pentatricopeptide repeat (AHRD V3.3 *** A0A200QJM0_9MAGN)
Replicates 1_1	SL4.0ch04	4013692	4013892	18.6	SL4.0ch04:4013792	-1939	Solyc04g011550.2.1	pheromone-processing carboxypeptidase KEX1-like (AHRD V3.3 --* XP_022740211.1)
Replicates 1_1	SL4.0ch08	61922588	61922788	18.2	SL4.0ch08:61922688	-9603	Solyc08g080550.1.1	C2 calcium-dependent membrane targeting (AHRD V3.3 *** A0A2U1N7N9_ARTAN)
Replicates 1_1	SL4.0ch03	59957615	59957815	18.2	SL4.0ch03:59957715	-2447	Solyc03g115985.1.1	Geranylgeranyl diphosphate reductase
Replicates 1_1	SL4.0ch11	2306083	2306283	18.2	SL4.0ch11:2306183	-2840	Solyc11g008060.1.1	Hyccin (AHRD V3.3 *** A0A2U1PKY1_ARTAN)
Replicates 1_1	SL4.0ch07	59451395	59451595	18.2	SL4.0ch07:59451495	-7329	Solyc07g049250.1.1	RNA-binding protein (AHRD V3.11 *-* tr|Q941H8|Q941H8_SOLTU)
Replicates 1_1	SL4.0ch00	3520125	3520325	28.1	SL4.0ch00:3520225	-617	Solyc00g500178.1.1	Unknown protein
Replicates 1_1	SL4.0ch00	6805392	6805592	38.6	SL4.0ch00:6805492	-57569	Solyc00g500290.2.1	Unknown protein
Replicates 1_1	SL4.0ch01	43755356	43755556	18	SL4.0ch01:43755456	-3667	Solyc01g050070.5.1	Transmembrane protein (AHRD V3.11 *** tr|A0A1P8AMQ6|A0A1P8AMQ6_ARATH)
Replicates 1_1	SL4.0ch00	607913	608113	20.5	SL4.0ch00:608013	-20107	Solyc00g500014.1.1	Unknown protein
Replicates 1_1	SL4.0ch05	1039435	1039635	26	SL4.0ch05:1039535	-7570	Solyc05g006330.2.1	Transducin/WD40 repeat-like superfamily protein (AHRD V3.3 *** A0A2U1QGB4_ARTAN)
Replicates 1_1	SL4.0ch09	64116676	64116876	26	SL4.0ch09:64116776	-19597	Solyc09g082190.1.1	Folate-biopterin transporter 1
Replicates 1_1	SL4.0ch12	64845615	64845815	25.7	SL4.0ch12:64845715	-1552	Solyc12g096380.1.1	Peptidyl-tRNA hydrolase II (PTH2) family protein (AHRD V3.3 *-* Q9FT62_ARATH)
Replicates 1_1	SL4.0ch00	6103215	6103415	25.6	SL4.0ch00:6103315	-46964	Solyc00g500267.1.1	Unknown protein
Replicates 1_1	SL4.0ch02	49224843	49225043	25.4	SL4.0ch02:49224943	-5956	Solyc02g089330.3.1	Alpha/beta-Hydrolases superfamily protein (AHRD V3.3 *** F4J5H1_ARATH)
Replicates 1_1	SL4.0ch06	47060678	47060878	25.4	SL4.0ch06:47060778	-962	Solyc06g084325.1.1	EID1-like F-box protein 3 (AHRD V3.3 *** A0A2G2ZF18_CAPAN)
Replicates 1_1	SL4.0ch00	9076206	9076406	25.2	SL4.0ch00:9076306	-1869	Solyc00g500384.1.1	Unknown protein
Replicates 1_1	SL4.0ch08	9557455	9557655	58	SL4.0ch08:9557555	-12149	Solyc08g150111.1.1	Unknown protein
Replicates 1_1	SL4.0ch01	60194636	60194836	18	SL4.0ch01:60194736	-12710	Solyc01g058550.1.1	DDT domain-containing protein PTM (AHRD V3.3 *-* XP_010313253.1)
Replicates 1_1	SL4.0ch08	9479253	9479453	30.9	SL4.0ch08:9479353	-22631	Solyc08g016794.1.1	Unknown protein
Replicates 1_1	SL4.0ch05	65081928	65082128	24	SL4.0ch05:65082028	-2381	Solyc05g056340.3.1	cleft lip and palate transmembrane protein 1 homolog (AHRD V3.3 *** A0A2I4DPR5_9ROSI)
Replicates 1_1	SL4.0ch06	1668168	1668368	24	SL4.0ch06:1668268	-8275	Solyc06g007650.2.1	FRIGIDA-like protein (AHRD V3.3 *** A0A2G3C4G8_CAPCH)
Replicates 1_1	SL4.0ch11	5085583	5085783	24	SL4.0ch11:5085683	-5053	Solyc11g012090.2.1	Phosphoribosylglycinamide formyltransferase (AHRD V3.3 *** A0A2U1PTP7_ARTAN)
Replicates 1_1	SL4.0ch01	74774179	74774379	29	SL4.0ch01:74774279	-6767	Solyc01g087570.2.1	hypothetical protein Chr3
Replicates 1_1	SL4.0ch07	937409	937609	28.7	SL4.0ch07:937509	-173	Solyc07g006100.4.1	Oxysterol-binding protein-related protein 1D (AHRD V3.3 *** A0A2G3BX83_CAPCH)
Replicates 1_1	SL4.0ch04	2106833	2107033	44	SL4.0ch04:2106933	-1132	Solyc04g008460.4.1	Potassium transporter (AHRD V3.3 *** A0A2G3CF51_CAPCH)
Replicates 1_1	SL4.0ch07	51156763	51156963	22	SL4.0ch07:51156863	-115132	Solyc07g040950.3.1	Lactoylglutathione lyase / glyoxalase I family protein (AHRD V3.3 *** A0A1Y1IMJ5_KLENI)
Replicates 1_1	SL4.0ch09	585308	585508	22	SL4.0ch09:585408	-15738	Solyc09g005860.3.1	Exocyst subunit Exo70 family protein (AHRD V3.11 *** tr|A0A2G2YQH8|A0A2G2YQH8_CAPAN)
Replicates 1_1	SL4.0ch09	60578877	60579077	21.9	SL4.0ch09:60578977	-33595	Solyc09g066080.3.1	Histone H1 (AHRD V3.3 *-* A0A2G2WIH1_CAPBA)
Replicates 1_1	SL4.0ch04	61540054	61540254	18	SL4.0ch04:61540154	-14111	Solyc04g078900.3.1	Coenzyme Q-binding protein (AHRD V3.11 *** tr|A0A2U1KEL4|A0A2U1KEL4_ARTAN)
Replicates 1_1	SL4.0ch05	62187284	62187484	35	SL4.0ch05:62187384	-8233	Solyc05g052590.1.1	CTD small phosphatase-like protein (AHRD V3.3 *** A0A1J3CDK2_NOCCA)
Replicates 1_1	SL4.0ch00	9186332	9186532	38	SL4.0ch00:9186432	-5175	Solyc00g500396.1.1	Unknown protein
Replicates 1_1	SL4.0ch12	64720687	64720887	27	SL4.0ch12:64720787	-3508	Solyc12g096170.2.1	embryo defective 3006 (AHRD V3.3 *** AT4G19350.1)
Replicates 1_1	SL4.0ch00	2668585	2668785	27	SL4.0ch00:2668685	-88902	Solyc00g500158.1.1	Unknown protein
Replicates 1_1	SL4.0ch02	47552794	47552994	26.7	SL4.0ch02:47552894	-200	Solyc02g086970.4.1	Aldehyde dehydrogenase (AHRD V3.3 *** A0A2U1MUY7_ARTAN)
Replicates 1_1	SL4.0ch02	17754266	17754466	20	SL4.0ch02:17754366	-125430	Solyc02g160320.1.1	MP domain-containing protein (AHRD V3.11 *** tr|A0A1Q3BUD1|A0A1Q3BUD1_CEPFO)
Replicates 1_1	SL4.0ch07	28229123	28229323	20	SL4.0ch07:28229223	-103927	Solyc07g025410.1.1	Unknown protein
Replicates 1_1	SL4.0ch09	56532610	56532810	20	SL4.0ch09:56532710	-42898	Solyc09g061798.1.1	3-ketoacyl-CoA thiolase peroxisomal-like (AHRD V3.11 *** tr|A0A2K3P5R8|A0A2K3P5R8_TRIPR)
Replicates 1_1	SL4.0ch11	2517693	2517893	20	SL4.0ch11:2517793	-3221	Solyc11g008260.2.1	P-loop containing nucleoside triphosphate hydrolases superfamily protein (AHRD V3.3 *** A0A2U1LNZ5_ARTAN)
Replicates 1_1	SL4.0ch03	58028922	58029122	19.9	SL4.0ch03:58029022	-6117	Solyc03g113470.3.1	Short-chain dehydrogenase reductase 4 (AHRD V3.3 *** A0A2G2WRF5_CAPBA)
Replicates 1_1	SL4.0ch08	9481252	9481452	19.9	SL4.0ch08:9481352	-20632	Solyc08g016794.1.1	Unknown protein
Replicates 1_1	SL4.0ch05	43138569	43138769	19.8	SL4.0ch05:43138669	-35820	Solyc05g161600.1.1	50S ribosomal protein L9 (AHRD V3.3 *** A0A1J3G0X5_NOCCA)
Replicates 1_1	SL4.0ch02	43843203	43843403	19.6	SL4.0ch02:43843303	-5802	Solyc02g082140.3.1	Surfeit locus protein 6 (AHRD V3.3 *** A0A2U1QM59_ARTAN)
Replicates 1_1	SL4.0ch02	37399209	37399409	19.4	SL4.0ch02:37399309	-4802	Solyc02g069520.2.1	Protein LIGHT-DEPENDENT SHORT HYPOCOTYLS 6 (AHRD V3.3 *** A0A2G3D431_CAPCH)
Replicates 1_1	SL4.0ch00	9131061	9131261	19.3	SL4.0ch00:9131161	-18838	Solyc00g500389.1.1	zinc finger CCCH domain-containing protein 24 (AHRD V3.3 --* XP_022001075.1)
Replicates 1_1	SL4.0ch03	3705743	3705943	19.1	SL4.0ch03:3705843	-13630	Solyc03g026260.4.1	Dehydration-responsive element-binding transcription factor (AHRD V3.3 *** A0A1S6M2D0_9CARY)
Replicates 1_1	SL4.0ch10	18113243	18113443	19.1	SL4.0ch10:18113343	-69362	Solyc10g160730.1.1	zinc finger (Ran-binding) family protein (AHRD V3.3 --* AT2G17975.2)
Replicates 1_1	SL4.0ch08	63829461	63829661	29.9	SL4.0ch08:63829561	-3744	Solyc08g083130.5.1	Alpha/beta-Hydrolases superfamily protein (AHRD V3.11 *** tr|A0A1Y1I3I6|A0A1Y1I3I6_KLENI)
Replicates 1_1	SL4.0ch05	1038631	1038831	29.7	SL4.0ch05:1038731	-6766	Solyc05g006330.2.1	Transducin/WD40 repeat-like superfamily protein (AHRD V3.3 *** A0A2U1QGB4_ARTAN)
Replicates 1_1	SL4.0ch01	60909902	60910102	19	SL4.0ch01:60910002	-14200	Solyc01g058700.1.1	Sister chromatid cohesion 1 protein 4 (AHRD V3.3 *-* A0A2G3DGK5_CAPCH)
Replicates 1_1	SL4.0ch01	9210094	9210294	18	SL4.0ch01:9210194	-63628	Solyc01g011435.1.1	O-acyltransferase WSD1-like (AHRD V3.3 *** A0A2I4EG31_9ROSI)
Replicates 1_1	SL4.0ch01	20451346	20451546	18	SL4.0ch01:20451446	-31230	Solyc01g161070.1.1	Kinesin-4 (AHRD V3.11 *-* tr|A0A2G3CDB4|A0A2G3CDB4_CAPCH)
Replicates 1_1	SL4.0ch01	28813024	28813224	18	SL4.0ch01:28813124	-15303	Solyc01g150124.1.1	Unknown protein
Replicates 1_1	SL4.0ch01	90581177	90581377	18	SL4.0ch01:90581277	-1260	Solyc01g112140.5.1	SEC1 family transport protein SLY1 (AHRD V3.3 *** A0A2G2W9B3_CAPBA)
Replicates 1_1	SL4.0ch02	38437514	38437714	18	SL4.0ch02:38437614	-4204	Solyc02g070830.1.1	Avr9/Cf-9 rapidly elicited protein 180 (AHRD V3.3 *** Q9FQZ1_TOBAC)
Replicates 1_1	SL4.0ch03	20700373	20700573	18	SL4.0ch03:20700473	-39920	Solyc03g160750.1.1	Ypt/Rab-GAP domain of gyp1p superfamily protein (AHRD V3.3 *** A0A2U1MNI3_ARTAN)
Replicates 1_1	SL4.0ch03	61481914	61482114	18	SL4.0ch03:61482014	-3307	Solyc03g118040.3.1	calnexin
Replicates 1_1	SL4.0ch03	63931380	63931580	18	SL4.0ch03:63931480	-6221	Solyc03g121390.1.1	Mitochondrial outer membrane import complex protein METAXIN (AHRD V3.3 *-* A0A2G2V8U8_CAPBA)
Replicates 1_1	SL4.0ch05	7449206	7449406	18	SL4.0ch05:7449306	-39698	Solyc05g013900.2.1	Protein terminal ear1-like protein (AHRD V3.3 *** A0A2G3B8W0_CAPCH)
Replicates 1_1	SL4.0ch06	763315	763515	18	SL4.0ch06:763415	-7986	Solyc06g005700.1.1	Two-component response regulator (AHRD V3.3 *-* C0HE02_MAIZE)
Replicates 1_1	SL4.0ch06	23588258	23588458	18	SL4.0ch06:23588358	-13026	Solyc06g036250.2.1	beta-carotene hydroxylase-1
Replicates 1_1	SL4.0ch06	35873493	35873693	18	SL4.0ch06:35873593	-5968	Solyc06g060230.3.1	NAC domain-containing protein (AHRD V3.3 *** A0A2K3N804_TRIPR)
Replicates 1_1	SL4.0ch07	54220236	54220436	18	SL4.0ch07:54220336	-14161	Solyc07g041860.1.1	Tubulin--tyrosine ligase-like protein 12 (AHRD V3.3 *** A0A1J3IML6_NOCCA)
Replicates 1_1	SL4.0ch07	56397217	56397417	18	SL4.0ch07:56397317	-1977	Solyc07g043020.1.1	Glycosyltransferase (AHRD V3.3 *-* A0A2I4FGA1_9ROSI)
Replicates 1_1	SL4.0ch07	63155146	63155346	18	SL4.0ch07:63155246	-4116	Solyc07g055090.1.1	Trihelix transcription factor ASIL1 (AHRD V3.3 *** A0A2G2WEG4_CAPBA)
Replicates 1_1	SL4.0ch07	66338362	66338562	18	SL4.0ch07:66338462	-3	Solyc07g064300.3.1	hypothetical protein (AHRD V3.3 *-* AT1G50910.1)
Replicates 1_1	SL4.0ch08	11725726	11725926	18	SL4.0ch08:11725826	-10739	Solyc08g048550.3.1	Protease Do-like 5
Replicates 1_1	SL4.0ch08	16191507	16191707	18	SL4.0ch08:16191607	-177701	Solyc08g045800.2.1	Pentatricopeptide repeat-containing protein (AHRD V3.3 *** A0A2G3BRB1_CAPCH)
Replicates 1_1	SL4.0ch08	34126089	34126289	18	SL4.0ch08:34126189	-46669	Solyc08g021870.3.1	Ankyrin repeat family protein (AHRD V3.3 *-* F8WLA0_CITUN)
Replicates 1_1	SL4.0ch09	25400504	25400704	18	SL4.0ch09:25400604	-16747	Solyc09g031950.3.1	Villin-4 (AHRD V3.3 *-* A0A2G3BHK0_CAPCH)
Replicates 1_1	SL4.0ch10	24087138	24087338	18	SL4.0ch10:24087238	-80271	Solyc10g062180.2.1	RNA binding protein (AHRD V3.3 *-* A0A2K3MUE2_TRIPR)
Replicates 1_1	SL4.0ch10	38486125	38486325	18	SL4.0ch10:38486225	-12492	Solyc10g047080.1.1	Unknown protein
Replicates 1_1	SL4.0ch10	45224583	45224783	18	SL4.0ch10:45224683	-12522	Solyc10g049600.3.1	3-oxo-Delta(4
Replicates 1_1	SL4.0ch11	32513092	32513292	18	SL4.0ch11:32513192	-5185	Solyc11g043020.1.1	Pentatricopeptide repeat (AHRD V3.3 *-* A0A200PRW4_9MAGN)
Replicates 1_1	SL4.0ch12	9478638	9478838	18	SL4.0ch12:9478738	-33483	Solyc12g160350.1.1	Photosystem II CP43 reaction center protein (AHRD V3.11 *-* tr|A0A2G2WUM4|A0A2G2WUM4_CAPBA)
Replicates 1_1	SL4.0ch12	17368521	17368721	18	SL4.0ch12:17368621	-55439	Solyc12g160920.1.1	Epoxide hydrolase (AHRD V3.11 *-* tr|Q41414|Q41414_SOLTU)
Replicates 1_1	SL4.0ch12	66211041	66211241	18	SL4.0ch12:66211141	-2183	Solyc12g099580.2.1	WAT1-related protein (AHRD V3.3 *** K4DHX9_SOLLC)
Replicates 1_1	SL4.0ch00	8474037	8474237	32.9	SL4.0ch00:8474137	-2263	Solyc00g500368.1.1	Unknown protein
Replicates 1_1	SL4.0ch02	41954794	41954994	25	SL4.0ch02:41954894	-3281	Solyc02g079380.2.1	Protein PLANT CADMIUM RESISTANCE like (AHRD V3.3 *** A0A2R6QA13_ACTCH)
Replicates 1_1	SL4.0ch02	49577807	49578007	25	SL4.0ch02:49577907	-8597	Solyc02g089830.2.1	TCP transcription factor 7
Replicates 1_1	SL4.0ch06	39435904	39436104	25	SL4.0ch06:39436004	-4262	Solyc06g066550.3.1	Ethylene-responsive transcription factor (AHRD V3.3 *-* A0A2G2XMU8_CAPBA)
Replicates 1_1	SL4.0ch05	28301567	28301767	25	SL4.0ch05:28301667	-38538	Solyc05g161160.1.1	ATP-citrate synthase beta chain protein 1 (AHRD V3.11 *-* tr|A0A2G3CHP1|A0A2G3CHP1_CAPCH)
Replicates 1_1	SL4.0ch08	55409149	55409349	18	SL4.0ch08:55409249	-2489	Solyc08g068210.3.1	GTP-binding protein (AHRD V3.11 *** tr|A0A2G2YY28|A0A2G2YY28_CAPAN)
Replicates 1_1	SL4.0ch00	9326894	9327094	20.1	SL4.0ch00:9326994	-119629	Solyc00g500397.1.1	Unknown protein
Replicates 1_1	SL4.0ch07	62913487	62913687	19	SL4.0ch07:62913587	-7157	Solyc07g054800.1.1	Unknown protein
Replicates 1_1	SL4.0ch10	55524041	55524241	18	SL4.0ch10:55524141	-4802	Solyc10g055197.2.1	Dirigent protein (AHRD V3.3 *** M1DWT6_SOLTU)
Replicates 1_1	SL4.0ch01	84736235	84736435	18	SL4.0ch01:84736335	-8383	Solyc01g103960.3.1	Bifunctional hydroxymethylpyrimidine kinase/phosphomethylpyrimidine kinase (AHRD V3.3 *** A0A2Z4MGS9_BREBE)
Replicates 1_1	SL4.0ch00	3246776	3246976	43	SL4.0ch00:3246876	-88276	Solyc00g500174.1.1	Unknown protein
Replicates 1_1	SL4.0ch07	66801719	66801919	23	SL4.0ch07:66801819	-11049	Solyc07g065020.3.1	Transcription initiation factor TFIID subunit 6b (AHRD V3.3 *** A0A2G3C2L0_CAPCH)
Replicates 1_1	SL4.0ch08	59087839	59088039	23	SL4.0ch08:59087939	-5070	Solyc08g077040.3.1	AT-hook motif nuclear-localized protein 10 (AHRD V3.11 *** tr|A0A2G3DCF2|A0A2G3DCF2_CAPCH)
Replicates 1_1	SL4.0ch02	49613763	49613963	23	SL4.0ch02:49613863	-8906	Solyc02g089860.1.1	Hexosyltransferase (AHRD V3.3 *** A0A1U8G2N1_CAPAN)
Replicates 1_1	SL4.0ch04	61172399	61172599	22.7	SL4.0ch04:61172499	-4217	Solyc04g078460.3.1	Isoaspartyl peptidase/L-asparaginase (AHRD V3.3 *** A0A1U8GBV5_CAPAN)
Replicates 1_1	SL4.0ch02	50309207	50309407	22.2	SL4.0ch02:50309307	-484	Solyc02g090760.4.1	hypothetical protein (AHRD V3.3 *-* AT3G50370.2)
Replicates 1_1	SL4.0ch01	5378116	5378316	22.2	SL4.0ch01:5378216	-13949	Solyc01g010470.2.1	Glycine-rich protein (AHRD V3.11 *** tr|Q9LFX8|Q9LFX8_ARATH)
Replicates 1_1	SL4.0ch11	53936035	53936235	34	SL4.0ch11:53936135	-11952	Solyc11g072627.1.1	Zinc-binding dehydrogenase (AHRD V3.3 *** A0A162PTR1_9PEZI)
Replicates 1_1	SL4.0ch00	9140709	9140909	33.6	SL4.0ch00:9140809	-2648	Solyc00g500391.1.1	Unknown protein
Replicates 1_1	SL4.0ch10	61873091	61873291	18	SL4.0ch10:61873191	-2200	Solyc10g081760.3.1	Mal d 1-associated protein (AHRD V3.3 *** AT2G35900.1)
Replicates 1_1	SL4.0ch00	6104411	6104611	71	SL4.0ch00:6104511	-45768	Solyc00g500267.1.1	Unknown protein
Replicates 1_1	SL4.0ch00	3248312	3248512	21	SL4.0ch00:3248412	-89812	Solyc00g500174.1.1	Unknown protein
Replicates 1_1	SL4.0ch02	33403802	33404002	21	SL4.0ch02:33403902	-4310	Solyc02g063310.2.1	U-box domain-containing protein 4-like (AHRD V3.11 *** tr|A0A2I4HV32|A0A2I4HV32_9ROSI)
Replicates 1_1	SL4.0ch04	63687436	63687636	21	SL4.0ch04:63687536	-5125	Solyc04g081830.1.1	la-related protein 1C-like (AHRD V3.3 *** A0A2I4H6L2_9ROSI)
Replicates 1_1	SL4.0ch07	5997678	5997878	21	SL4.0ch07:5997778	-147187	Solyc07g015970.3.1	Methyl-CpG-binding domain-containing protein 2 (AHRD V3.3 *-* A0A1U8GNC1_CAPAN)
Replicates 1_1	SL4.0ch09	4299983	4300183	21	SL4.0ch09:4300083	-41827	Solyc09g010880.3.1	NAD(P)-binding Rossmann-fold superfamily protein (AHRD V3.11 *** tr|A0A2U1L7N5|A0A2U1L7N5_ARTAN)
Replicates 1_1	SL4.0ch09	45415111	45415311	21	SL4.0ch09:45415211	-72112	Solyc09g056453.1.1	zinc-finger homeodomain protein 4-like (AHRD V3.3 *** XP_010314609.1)
Replicates 1_1	SL4.0ch11	13099243	13099443	21	SL4.0ch11:13099343	-51070	Solyc11g020950.3.1	Unknown protein
Replicates 1_1	SL4.0ch11	29707200	29707400	21	SL4.0ch11:29707300	-87550	Solyc11g045330.2.1	Paired amphipathic helix Sin3-like protein (AHRD V3.3 *-* A0A178WJA6_ARATH)
Replicates 1_1	SL4.0ch04	12318901	12319101	20.8	SL4.0ch04:12319001	-4396	Solyc04g039775.1.1	Unknown protein
Replicates 1_1	SL4.0ch12	65008336	65008536	20.7	SL4.0ch12:65008436	-17833	Solyc12g096640.4.1	type I inositol polyphosphate 5-phosphatase 12-like (AHRD V3.3 *** A0A2I4G632_9ROSI)
Replicates 1_1	SL4.0ch05	17448954	17449154	20.6	SL4.0ch05:17449054	-3593	Solyc05g016530.1.1	Unknown protein
Replicates 1_1	SL4.0ch02	14498250	14498450	20.2	SL4.0ch02:14498350	-5877	Solyc02g014250.3.1	Disease resistance protein RGA2 (AHRD V3.3 *-* A0A2G2XMC9_CAPBA)
Replicates 1_1	SL4.0ch00	9076363	9076563	20.1	SL4.0ch00:9076463	-2026	Solyc00g500384.1.1	Unknown protein
Replicates 1_1	SL4.0ch12	3846162	3846362	25.9	SL4.0ch12:3846262	-8144	Solyc12g010920.2.1	F-box protein MAX2 (AHRD V3.3 *** A0A2G2X2R2_CAPBA)
Replicates 1_1	SL4.0ch01	83735095	83735295	25.5	SL4.0ch01:83735195	-6132	Solyc01g102720.3.1	NAD(P)-binding Rossmann-fold superfamily protein (AHRD V3.3 *** Q9ZVQ2_ARATH)
Replicates 1_1	SL4.0ch00	2605878	2606078	38	SL4.0ch00:2605978	-26195	Solyc00g500158.1.1	Cytochrome b6-f complex subunit 4 (AHRD V3.3 *** A0A2G2XBM1_CAPBA)
Replicates 1_1	SL4.0ch00	2919385	2919585	34.8	SL4.0ch00:2919485	-8146	Solyc00g160360.1.1	Unknown protein
Replicates 1_1	SL4.0ch01	16031218	16031418	19	SL4.0ch01:16031318	-200588	Solyc01g014960.1.1	receptor-like protein 12 (AHRD V3.11 *-* tr|A0A2G2YW48|A0A2G2YW48_CAPAN)
Replicates 1_1	SL4.0ch01	56824828	56825028	19	SL4.0ch01:56824928	-19876	Solyc01g057760.4.1	RNA helicase DEAD2
Replicates 1_1	SL4.0ch01	68916951	68917151	19	SL4.0ch01:68917051	-2513	Solyc05g018270.2.1	ATP-citrate synthase beta chain protein 1 (AHRD V3.11 *-* tr|A0A2G3CHP1|A0A2G3CHP1_CAPCH)
Replicates 1_1	SL4.0ch01	73661458	73661658	19	SL4.0ch01:73661558	-1191	Solyc01g073905.1.1	E3 ubiquitin-protein ligase (AHRD V3.3 *-* A0A2G3D341_CAPCH)
Replicates 1_1	SL4.0ch01	79515595	79515795	19	SL4.0ch01:79515695	-10344	Solyc01g096130.3.1	Aluminum-activated malate transporter 10 (AHRD V3.3 *** A0A2G2YY99_CAPAN)
Replicates 1_1	SL4.0ch01	88383500	88383700	19	SL4.0ch01:88383600	-2181	Solyc01g108900.5.1	maternal effect embryo arrest 14 Chr2
Replicates 1_1	SL4.0ch02	9135695	9135895	19	SL4.0ch02:9135795	-64048	Solyc02g005520.2.1	pterin-4-alpha-carbinolamine dehydratase 2
Replicates 1_1	SL4.0ch02	18773597	18773797	19	SL4.0ch02:18773697	-281696	Solyc02g020870.1.1	Glyceraldehyde-3-phosphate dehydrogenase (AHRD V3.3 *** A0A2G3D2C2_CAPCH)
Replicates 1_1	SL4.0ch04	26899267	26899467	19	SL4.0ch04:26899367	-6170	Solyc04g160340.1.1	MP domain-containing protein (AHRD V3.11 *** tr|A0A1Q3DDM2|A0A1Q3DDM2_CEPFO)
Replicates 1_1	SL4.0ch05	61853791	61853991	19	SL4.0ch05:61853891	-1112	Solyc05g052160.4.1	Acyl-CoA N-acyltransferases (NAT) superfamily protein Chr4
Replicates 1_1	SL4.0ch06	4592571	4592771	19	SL4.0ch06:4592671	-26208	Solyc06g009983.1.1	Unknown protein
Replicates 1_1	SL4.0ch06	39348875	39349075	19	SL4.0ch06:39348975	-7751	Solyc06g066430.3.1	hexokinase 2
Replicates 1_1	SL4.0ch06	40821132	40821332	19	SL4.0ch06:40821232	-544	Solyc06g069440.3.1	Zinc finger transcription factor 45
Replicates 1_1	SL4.0ch07	40206613	40206813	19	SL4.0ch07:40206713	-204089	Solyc07g032590.1.1	Unknown protein
Replicates 1_1	SL4.0ch08	41218143	41218343	19	SL4.0ch08:41218243	-1014121	Solyc08g161290.1.1	Unknown protein
Replicates 1_1	SL4.0ch08	51695270	51695470	19	SL4.0ch08:51695370	-3797	Solyc08g065480.3.1	Ferrochelatase (AHRD V3.3 *** A0A2G3BRU7_CAPCH)
Replicates 1_1	SL4.0ch08	58319659	58319859	19	SL4.0ch08:58319759	-3378	Solyc08g076180.3.1	protein dimerization (AHRD V3.3 *-* AT5G45610.1)
Replicates 1_1	SL4.0ch08	63978361	63978561	19	SL4.0ch08:63978461	-1703	Solyc08g083370.4.1	Photosynthetic NDH subcomplex B 3 (AHRD V3.3 *** A0A0F7GXX2_9ROSI)
Replicates 1_1	SL4.0ch09	33390224	33390424	19	SL4.0ch09:33390324	-156872	Solyc09g055185.1.1	RNA-directed DNA polymerase (AHRD V3.3 *-* A0A2I0W698_9ASPA)
Replicates 1_1	SL4.0ch10	1900417	1900617	19	SL4.0ch10:1900517	-5042	Solyc10g007800.3.1	Unknown protein
Replicates 1_1	SL4.0ch10	14234510	14234710	19	SL4.0ch10:14234610	-327962	Solyc10g024495.1.1	Putative membrane lipoprotein (AHRD V3.3 *** AT5G17590.1)
Replicates 1_1	SL4.0ch10	23504773	23504973	19	SL4.0ch10:23504873	-236971	Solyc10g062130.1.1	Major facilitator
Replicates 1_1	SL4.0ch11	45197026	45197226	19	SL4.0ch11:45197126	-490791	Solyc11g056630.1.1	hypothetical protein (AHRD V3.3 *-* AT4G12070.1)
Replicates 1_1	SL4.0ch12	18601515	18601715	19	SL4.0ch12:18601615	-31062	Solyc12g077630.1.1	Unknown protein
Replicates 1_1	SL4.0ch12	29310145	29310345	19	SL4.0ch12:29310245	-12641	Solyc12g161140.1.1	Exostosin-like protein (AHRD V3.11 *-* tr|S8DDV0|S8DDV0_9LAMI)
Replicates 1_1	SL4.0ch12	56027061	56027261	19	SL4.0ch12:56027161	-123355	Solyc12g042020.3.1	MADS-box transcription factor (AHRD V3.11 *-* tr|A0A2K3LQ55|A0A2K3LQ55_TRIPR)
Replicates 1_1	SL4.0ch03	58474727	58474927	18.8	SL4.0ch03:58474827	-8186	Solyc03g113990.4.1	Pentatricopeptide repeat-containing protein (AHRD V3.3 *** A0A2U1Q882_ARTAN)
Replicates 1_1	SL4.0ch03	9207669	9207869	18.4	SL4.0ch03:9207769	-9841	Solyc03g044540.1.1	Oleosin 14.9 kDa (AHRD V3.3 *-* A0A2G3CHZ7_CAPCH)
Replicates 1_1	SL4.0ch03	55911768	55911968	18.4	SL4.0ch03:55911868	-4739	Solyc03g019690.1.1	Transmembrane protein
Replicates 1_1	SL4.0ch08	1819106	1819306	18.3	SL4.0ch08:1819206	-10176	Solyc08g007225.1.1	Ethylene-responsive transcription factor 2 (AHRD V3.3 *** A0A2G3DC56_CAPCH)
Replicates 1_1	SL4.0ch05	64131012	64131212	18.3	SL4.0ch05:64131112	-9228	Solyc05g054940.3.1	Peroxisome biogenesis protein 12 (AHRD V3.3 *** A0A2G2XWY5_CAPAN)
Replicates 1_1	SL4.0ch09	66261489	66261689	18.1	SL4.0ch09:66261589	-8657	Solyc09g090720.3.1	AMT1
Replicates 1_1	SL4.0ch06	41907891	41908091	18	SL4.0ch06:41907991	-12618	Solyc06g071840.3.1	BTB/POZ and TAZ domain-containing protein 1 (AHRD V3.3 *** A0A2G3BFP5_CAPCH)
Replicates 1_1	SL4.0ch00	8237943	8238143	21	SL4.0ch00:8238043	-123761	Solyc00g160130.1.1	1-deoxy-D-xylulose 5-phosphate reductoisomerase
Replicates 1_1	SL4.0ch03	59516180	59516380	24	SL4.0ch03:59516280	-1304	Solyc03g115370.3.1	40S ribosomal protein S19 (AHRD V3.3 *** A0A1U8G3N2_CAPAN)
Replicates 1_1	SL4.0ch04	60801995	60802195	24	SL4.0ch04:60802095	-573	Solyc04g077940.4.1	nucleic acid binding protein (AHRD V3.3 *-* AT1G27750.1)
Replicates 1_1	SL4.0ch05	64921178	64921378	24	SL4.0ch05:64921278	-6822	Solyc05g056130.4.1	Zinc finger (C3HC4-type RING finger) family protein (AHRD V3.3 *** A0A2U1N0U6_ARTAN)
Replicates 1_1	SL4.0ch09	66925535	66925735	24	SL4.0ch09:66925635	-12106	Solyc09g091590.3.1	2-octaprenyl-3-methyl-6-methoxy-1
Replicates 1_1	SL4.0ch12	63789304	63789504	24	SL4.0ch12:63789404	-5018	Solyc12g089090.2.1	Outer envelope pore protein 24A
Replicates 1_1	SL4.0ch12	64900841	64901041	24	SL4.0ch12:64900941	-1448	Solyc12g096470.2.1	Protein GLUTAMINE DUMPER 4 (AHRD V3.3 *** A0A2G3B4X7_CAPCH)
Replicates 1_1	SL4.0ch02	42225872	42226072	23.6	SL4.0ch02:42225972	-1784	Solyc02g079810.3.1	Pentatricopeptide repeat-containing protein (AHRD V3.3 *** A0A1J3IUT7_NOCCA)
Replicates 1_1	SL4.0ch01	83507846	83508046	23.5	SL4.0ch01:83507946	-7440	Solyc01g102420.1.1	Glutamine--tRNA ligase (AHRD V3.3 *** A0A2I0WQV3_9ASPA)
Replicates 1_1	SL4.0ch12	600480	600680	23.1	SL4.0ch12:600580	-3573	Solyc12g005950.2.1	Ethylene-responsive transcription factor 3 (AHRD V3.3 *-* A0A2U1KRH6_ARTAN)
Replicates 1_1	SL4.0ch00	1640435	1640635	28.5	SL4.0ch00:1640535	-51552	Solyc00g500088.2.1	Unknown protein
Replicates 1_1	SL4.0ch06	10937964	10938164	18.2	SL4.0ch06:10938064	-922	Solyc06g016685.1.1	Unknown protein
Replicates 1_1	SL4.0ch00	9139392	9139592	29.7	SL4.0ch00:9139492	-1331	Solyc00g500391.1.1	Unknown protein
Replicates 1_1	SL4.0ch10	62574385	62574585	18	SL4.0ch10:62574485	-14590	Solyc10g083610.2.1	DNA demethylase 2
Replicates 1_1	SL4.0ch00	9077710	9077910	28.2	SL4.0ch00:9077810	-3373	Solyc00g500384.1.1	Unknown protein
Replicates 1_1	SL4.0ch01	583056	583256	27	SL4.0ch01:583156	-3594	Solyc01g005850.3.1	Ubiquitin conjugating enzyme (AHRD V3.3 *** W7U085_9STRA)
Replicates 1_1	SL4.0ch01	87867695	87867895	27	SL4.0ch01:87867795	-3755	Solyc01g108190.3.1	Protein disulfide-isomerase SCO2 (AHRD V3.3 *** A0A2G3AT86_CAPCH)
Replicates 1_1	SL4.0ch08	60135966	60136166	27	SL4.0ch08:60136066	-7341	Solyc08g078200.2.1	Ethylene-responsive transcription factor 5 (AHRD V3.11 *** tr|A0A2G2XL45|A0A2G2XL45_CAPBA)
Replicates 1_1	SL4.0ch05	1977251	1977451	26.5	SL4.0ch05:1977351	-58159	Solyc05g007230.4.1	Ribulose-phosphate 3-epimerase (AHRD V3.3 *** A0A328DMM8_9ASTE)
Replicates 1_1	SL4.0ch00	2863234	2863434	35.6	SL4.0ch00:2863334	-64297	Solyc00g160360.1.1	Unknown protein
Replicates 1_1	SL4.0ch00	9077313	9077513	33	SL4.0ch00:9077413	-2976	Solyc00g500384.1.1	Unknown protein
Replicates 1_1	SL4.0ch02	40774007	40774207	22	SL4.0ch02:40774107	-766	Solyc02g077960.4.1	Dof zinc finger protein PBF (AHRD V3.11 *** tr|A0A2G3A8C7|A0A2G3A8C7_CAPAN)
Replicates 1_1	SL4.0ch02	43273080	43273280	22	SL4.0ch02:43273180	-13132	Solyc02g081270.4.1	Pentatricopeptide repeat-containing protein
Replicates 1_1	SL4.0ch05	2577281	2577481	22	SL4.0ch05:2577381	-5596	Solyc05g008130.4.1	hydroxyproline-rich glycoprotein family protein (AHRD V3.3 --* AT1G23040.3)
Replicates 1_1	SL4.0ch08	60235090	60235290	22	SL4.0ch08:60235190	-3666	Solyc08g078320.3.1	Chromogranin (DUF1639) (AHRD V3.3 *-* O23587_ARATH)
Replicates 1_1	SL4.0ch01	72310050	72310250	21.9	SL4.0ch01:72310150	-9366	Solyc01g080490.2.1	Plant/F10N7-170 protein
Replicates 1_1	SL4.0ch04	3294087	3294287	21.8	SL4.0ch04:3294187	-14854	Solyc04g009920.3.1	cell division cycle 5
Replicates 1_1	SL4.0ch00	536138	536338	21.6	SL4.0ch00:536238	-8456	Solyc00g500010.1.1	Unknown protein
Replicates 1_1	SL4.0ch10	63643782	63643982	21.4	SL4.0ch10:63643882	-6147	Solyc10g085210.2.1	Heparanase-like protein 3 (AHRD V3.3 *** A0A1U8EH62_CAPAN)
Replicates 1_1	SL4.0ch01	72139933	72140133	21.3	SL4.0ch01:72140033	-9483	Solyc01g080320.3.1	BSD domain-containing protein (AHRD V3.11 *** tr|A0A1Q3B6E5|A0A1Q3B6E5_CEPFO)
Replicates 1_1	SL4.0ch03	252192	252392	18.4	SL4.0ch03:252292	-9606	Solyc03g005397.1.1	Unknown protein
Replicates 1_1	SL4.0ch01	47621457	47621657	18	SL4.0ch01:47621557	-150014	Solyc01g056485.2.1	Photosystem II CP43 reaction center protein (AHRD V3.3 *-* A0A2S0SUS0_9FABA)
Replicates 1_1	SL4.0ch08	9535172	9535372	28.2	SL4.0ch08:9535272	-34432	Solyc08g150111.1.1	Unknown protein
Replicates 1_1	SL4.0ch08	9392230	9392430	69	SL4.0ch08:9392330	-21945	Solyc08g016792.1.1	Unknown protein
Replicates 1_1	SL4.0ch10	851218	851418	25	SL4.0ch10:851318	-1029	Solyc10g006320.3.1	Vacuolar protein sorting-associated protein (AHRD V3.3 *** A0A2G2VR43_CAPBA)
Replicates 1_1	SL4.0ch00	9120133	9120333	36.2	SL4.0ch00:9120233	-7910	Solyc00g500389.1.1	Unknown protein
Replicates 1_1	SL4.0ch06	5039307	5039507	20	SL4.0ch06:5039407	-10840	Solyc06g010140.1.1	Unknown protein
Replicates 1_1	SL4.0ch01	839550	839750	20	SL4.0ch01:839650	-6028	Solyc01g006190.3.1	Unknown protein
Replicates 1_1	SL4.0ch01	57587408	57587608	20	SL4.0ch01:57587508	-179523	Solyc01g057900.3.1	R2R3MYB transcription factor 2
Replicates 1_1	SL4.0ch01	70741115	70741315	20	SL4.0ch01:70741215	-3511	Solyc01g079080.3.1	Protoporphyrinogen oxidase (AHRD V3.3 *** O64384_SOLTU)
Replicates 1_1	SL4.0ch02	3132687	3132887	20	SL4.0ch02:3132787	-163	Solyc02g160080.1.1	Gag/pol polyprotein (AHRD V3.11 *-* tr|Q6WAY7|Q6WAY7_PEA)
Replicates 1_1	SL4.0ch03	6260926	6261126	20	SL4.0ch03:6261026	-1265	Solyc03g150107.2.1	Eukaryotic translation initiation factor 5 (AHRD V3.11 *** tr|A0A2G2VCU5|A0A2G2VCU5_CAPBA)
Replicates 1_1	SL4.0ch03	35892074	35892274	20	SL4.0ch03:35892174	-17865	Solyc03g065150.1.1	Unknown protein
Replicates 1_1	SL4.0ch04	55913594	55913794	20	SL4.0ch04:55913694	-12133	Solyc04g150162.1.1	Vacuolar iron transporter-like protein 4 (AHRD V3.3 *** A0A2G3CN36_CAPCH)
Replicates 1_1	SL4.0ch06	46924076	46924276	20	SL4.0ch06:46924176	-3300	Solyc06g084130.3.1	Jasmonate ZIM domain protein k.1 (AHRD V3.3 *** I3WTA8_NICAT)
Replicates 1_1	SL4.0ch07	29225460	29225660	20	SL4.0ch07:29225560	-202816	Solyc07g025530.1.1	Unknown protein
Replicates 1_1	SL4.0ch07	54846494	54846694	20	SL4.0ch07:54846594	-7811	Solyc07g042090.4.1	Protein LAZ1-like protein 2 (AHRD V3.3 *** A0A2G3BYI1_CAPCH)
Replicates 1_1	SL4.0ch08	25422784	25422984	20	SL4.0ch08:25422884	-81087	Solyc08g160730.1.1	Homeobox protein knotted-1-like 3-like (AHRD V3.3 *** A0A2K3PJ30_TRIPR)
Replicates 1_1	SL4.0ch09	63676337	63676537	20	SL4.0ch09:63676437	-23333	Solyc09g075820.3.1	Protein TIME FOR COFFEE (AHRD V3.3 *-* A0A2K3NUY4_TRIPR)
Replicates 1_1	SL4.0ch09	66594145	66594345	20	SL4.0ch09:66594245	-1593	Solyc09g091180.3.1	NADH dehydrogenase [ubiquinone] 1 alpha subcomplex subunit 13-B (AHRD V3.3 *** A0A2G3CRY5_CAPCH)
Replicates 1_1	SL4.0ch09	68267488	68267688	20	SL4.0ch09:68267588	-2223	Solyc09g098380.3.1	Fanconi-associated nuclease (AHRD V3.11 *** tr|A0A328DUX8|A0A328DUX8_9ASTE)
Replicates 1_1	SL4.0ch11	14758557	14758757	20	SL4.0ch11:14758657	-264267	Solyc11g022610.1.1	Mitochondrial transcription termination factor family protein (AHRD V3.3 *-* B4FH48_MAIZE)
Replicates 1_1	SL4.0ch11	50422907	50423107	20	SL4.0ch11:50423007	-17506	Solyc11g066640.1.1	aspartic proteinase-like protein 2 (AHRD V3.3 *** A0A1U7W5P3_NICSY)
Replicates 1_1	SL4.0ch05	710960	711160	19.9	SL4.0ch05:711060	0	Solyc05g005860.3.1	WAT1-related protein (AHRD V3.3 *** K4BWB3_SOLLC)
Replicates 1_1	SL4.0ch11	2967197	2967397	19.9	SL4.0ch11:2967297	-11140	Solyc11g008740.2.1	Pentatricopeptide repeat-containing protein (AHRD V3.3 *** A0A2G2VE96_CAPBA)
Replicates 1_1	SL4.0ch00	535330	535530	19.7	SL4.0ch00:535430	-9264	Solyc00g500010.1.1	Unknown protein
Replicates 1_1	SL4.0ch06	40922746	40922946	19.6	SL4.0ch06:40922846	-336	Solyc06g069520.4.1	hypothetical protein (AHRD V3.3 *** AT5G07950.1)
Replicates 1_1	SL4.0ch03	57912135	57912335	19.2	SL4.0ch03:57912235	-4422	Solyc03g113320.1.1	Nodulin-like / Major Facilitator Superfamily protein (AHRD V3.3 *** A0A2U1M3G7_ARTAN)
Replicates 1_1	SL4.0ch05	3376841	3377041	19.1	SL4.0ch05:3376941	-14589	Solyc05g009180.1.1	chlorophyll a/b-binding protein
Replicates 1_1	SL4.0ch07	65558651	65558851	28	SL4.0ch07:65558751	-3879	Solyc07g063190.4.1	Unknown protein
Replicates 1_1	SL4.0ch00	534044	534244	30.8	SL4.0ch00:534144	-10550	Solyc00g500010.1.1	Unknown protein
Replicates 1_1	SL4.0ch06	5075316	5075516	21	SL4.0ch06:5075416	-46849	Solyc06g010140.1.1	Unknown protein
Replicates 1_1	SL4.0ch06	11173829	11174029	19.1	SL4.0ch06:11173929	-84288	Solyc06g016720.3.1	Unknown protein
Replicates 1_1	SL4.0ch03	12673438	12673638	30	SL4.0ch03:12673538	-56623	Solyc03g046591.1.1	Unknown protein
Replicates 1_1	SL4.0ch00	2910773	2910973	25.1	SL4.0ch00:2910873	-16758	Solyc00g160360.1.1	Unknown protein
Replicates 1_1	SL4.0ch01	36981680	36981880	18	SL4.0ch01:36981780	-64614	Solyc01g028830.3.1	Evolutionarily conserved C-terminal region 2 (AHRD V3.3 *** F4JDC2_ARATH)
Replicates 1_1	SL4.0ch01	76363864	76364064	18	SL4.0ch01:76363964	-4200	Solyc01g090450.3.1	cotton fiber protein (AHRD V3.3 *-* AT3G60380.1)
Replicates 1_1	SL4.0ch02	51526800	51527000	18	SL4.0ch02:51526900	-4502	Solyc02g092420.4.1	60S ribosomal protein L26 (AHRD V3.3 *** A0A1U8FHZ3_CAPAN)
Replicates 1_1	SL4.0ch02	51693612	51693812	18	SL4.0ch02:51693712	-1155	Solyc02g092590.3.1	glycosyltransferase-like protein (AHRD V3.3 *-* AT5G67390.3)
Replicates 1_1	SL4.0ch03	1850414	1850614	18	SL4.0ch03:1850514	-1351	Solyc03g007260.3.1	Cyclic nucleotide-gated ion channel 1 (AHRD V3.3 *** A0A2G2X7E9_CAPBA)
Replicates 1_1	SL4.0ch03	2792101	2792301	18	SL4.0ch03:2792201	-8391	Solyc03g025370.3.1	Peroxidase (AHRD V3.3 *** K4BF11_SOLLC)
Replicates 1_1	SL4.0ch03	36776168	36776368	18	SL4.0ch03:36776268	-512042	Solyc03g161020.1.1	beta-galactosidase 15-like
Replicates 1_1	SL4.0ch04	1397101	1397301	18	SL4.0ch04:1397201	-9139	Solyc04g007660.1.1	Sn-2 protein (AHRD V3.11 *** tr|Q39467|Q39467_CAPAN)
Replicates 1_1	SL4.0ch04	2077619	2077819	18	SL4.0ch04:2077719	-2330	Solyc04g160680.1.1	Serine/threonine-protein kinase BRI1-like 2 (AHRD V3.3 *** A0A2G2ZGZ4_CAPAN)
Replicates 1_1	SL4.0ch04	3011834	3012034	18	SL4.0ch04:3011934	-1939	Solyc04g009570.3.1	CDP-diacylglycerol--glycerol-3-phosphate 3-phosphatidyltransferase (AHRD V3.3 *** B6SU69_MAIZE)
Replicates 1_1	SL4.0ch04	28935374	28935574	18	SL4.0ch04:28935474	-5052	Solyc04g024690.1.1	Unknown protein
Replicates 1_1	SL4.0ch04	49835873	49836073	18	SL4.0ch04:49835973	-941	Solyc04g051475.1.1	Pentatricopeptide repeat (AHRD V3.3 *** A0A200PQ84_9MAGN)
Replicates 1_1	SL4.0ch05	40301295	40301495	18	SL4.0ch05:40301395	-17372	Solyc05g161530.1.1	Unknown protein
Replicates 1_1	SL4.0ch05	40833741	40833941	18	SL4.0ch05:40833841	-124542	Solyc05g026320.1.1	Protein Ycf2 (AHRD V3.3 *-* A0A0C5CKA6_ACTCH)
Replicates 1_1	SL4.0ch06	16217909	16218109	18	SL4.0ch06:16218009	-78138	Solyc06g019170.3.1	Delta-1-pyrroline-5-carboxylate synthase (AHRD V3.3 *** A0A0U1XEG4_LYCCN)
Replicates 1_1	SL4.0ch06	18928266	18928466	18	SL4.0ch06:18928366	-99359	Solyc06g031712.1.1	Zf-RVT domain-containing protein (AHRD V3.11 *** tr|A0A1Q3D833|A0A1Q3D833_CEPFO)
Replicates 1_1	SL4.0ch06	40087932	40088132	18	SL4.0ch06:40088032	-13595	Solyc06g068470.3.1	Magnesium transporter MRS2-B (AHRD V3.3 *** A0A2G2WL88_CAPBA)
Replicates 1_1	SL4.0ch07	63706150	63706350	18	SL4.0ch07:63706250	-4844	Solyc07g055860.4.1	MAP kinase kinase kinase 58
Replicates 1_1	SL4.0ch08	29682843	29683043	18	SL4.0ch08:29682943	-26010	Solyc08g022240.1.1	phospholipase A1-Igamma1
Replicates 1_1	SL4.0ch09	11142599	11142799	18	SL4.0ch09:11142699	-21926	Solyc09g160430.1.1	UBN2 domain-containing protein (AHRD V3.11 *** tr|A0A1Q3CD12|A0A1Q3CD12_CEPFO)
Replicates 1_1	SL4.0ch09	14596999	14597199	18	SL4.0ch09:14597099	-183836	Solyc09g018373.2.1	ARM repeat superfamily protein (AHRD V3.3 *** AT5G27970.1)
Replicates 1_1	SL4.0ch09	32732504	32732704	18	SL4.0ch09:32732604	-45003	Solyc09g160680.1.1	Pre-mRNA-splicing factor ATP-dependent RNA helicase DHX15 (AHRD V3.11 *-* tr|A0A2G2XQR9|A0A2G2XQR9_CAPBA)
Replicates 1_1	SL4.0ch10	1092459	1092659	18	SL4.0ch10:1092559	-11867	Solyc10g006770.4.1	Zinc finger protein CONSTANS-LIKE 10 (AHRD V3.11 *** tr|A0A2G2V382|A0A2G2V382_CAPBA)
Replicates 1_1	SL4.0ch10	23120541	23120741	18	SL4.0ch10:23120641	-87252	Solyc10g062080.1.1	protein FAR1-RELATED SEQUENCE 5-like (AHRD V3.3 *-* A0A2I4EWH9_9ROSI)
Replicates 1_1	SL4.0ch11	3232645	3232845	18	SL4.0ch11:3232745	-6592	Solyc11g009070.2.1	DAHP synthase 1 precursor
Replicates 1_1	SL4.0ch11	44112920	44113120	18	SL4.0ch11:44113020	-20504	Solyc11g056540.1.1	Unknown protein
Replicates 1_1	SL4.0ch12	33543494	33543694	18	SL4.0ch12:33543594	-130462	Solyc12g062650.1.1	Unknown protein
Replicates 1_1	SL4.0ch01	36568852	36569052	23	SL4.0ch01:36568952	-84877	Solyc01g028900.3.1	2-oxoisovalerate dehydrogenase subunit beta
Replicates 1_1	SL4.0ch01	77384464	77384664	23	SL4.0ch01:77384564	-3000	Solyc01g091520.3.1	Enoyl-CoA delta isomerase 1
Replicates 1_1	SL4.0ch03	56144773	56144973	23	SL4.0ch03:56144873	-6974	Solyc03g111070.3.1	3-oxoacyl-reductase (AHRD V3.3 *-* B6THT6_MAIZE)
Replicates 1_1	SL4.0ch08	63980971	63981171	23	SL4.0ch08:63981071	-6332	Solyc08g083340.1.1	Soluble inorganic pyrophosphatase (AHRD V3.3 *** A0A2G2VH82_CAPBA)
Replicates 1_1	SL4.0ch10	49335888	49336088	23	SL4.0ch10:49335988	-91908	Solyc10g050730.2.1	Cupredoxin (AHRD V3.3 *** A0A2U1P8C5_ARTAN)
Replicates 1_1	SL4.0ch12	27426025	27426225	23	SL4.0ch12:27426125	-97779	Solyc12g162430.1.1	SNF1-related protein kinase regulatory subunit beta-3 (AHRD V3.11 *-* tr|A0A2G2WMW8|A0A2G2WMW8_CAPBA)
Replicates 1_1	SL4.0ch12	32139695	32139895	23	SL4.0ch12:32139795	-34159	Solyc12g062430.1.1	Unknown protein
Replicates 1_1	SL4.0ch04	61430667	61430867	22.9	SL4.0ch04:61430767	-10186	Solyc04g078790.3.1	Transducin/WD40 repeat-like superfamily protein (AHRD V3.3 *** A0A2U1LUD4_ARTAN)
Replicates 1_1	SL4.0ch08	56932165	56932365	22.5	SL4.0ch08:56932265	-5581	Solyc08g074670.3.1	F-box/kelch-repeat protein SKIP25 (AHRD V3.3 *** A0A2G2XM52_CAPBA)
Replicates 1_1	SL4.0ch00	3253309	3253509	31.6	SL4.0ch00:3253409	-94809	Solyc00g500174.1.1	Unknown protein
Replicates 1_2	SL4.0ch00	3722839	3723039	198	SL4.0ch00:3722939	-3543	Solyc00g094550.1.1	hypothetical protein (AHRD V3.3 *-* AT2G07628.1)
Replicates 1_2	SL4.0ch00	3703725	3703925	201	SL4.0ch00:3703825	-340	Solyc00g500183.1.1	NADH dehydrogenase subunit 7 (AHRD V3.3 *-* A0A220T1K3_9ROSI)
Replicates 1_2	SL4.0ch04	57006858	57007058	102.5	SL4.0ch04:57006958	-11455	Solyc04g072039.1.1	Polyadenylate-binding protein (AHRD V3.3 *** A0A2G3CN64_CAPCH)
Replicates 1_2	SL4.0ch00	9189718	9189918	226.1	SL4.0ch00:9189818	-8561	Solyc00g500396.1.1	Unknown protein
Replicates 1_2	SL4.0ch12	64593520	64593720	75	SL4.0ch12:64593620	-3162	Solyc12g095970.3.1	Late embryogenesis abundant (LEA) hydroxyproline-rich glycoprotein family (AHRD V3.3 *** A0A2U1MMJ0_ARTAN)
Replicates 1_2	SL4.0ch05	2821310	2821510	74.9	SL4.0ch05:2821410	-2216	Solyc05g008420.4.1	Repressor of RNA polymerase III transcription (AHRD V3.3 *** A0A1U8F9V8_CAPAN)
Replicates 1_2	SL4.0ch00	3731832	3732032	150.7	SL4.0ch00:3731932	-3547	Solyc00g023700.2.1	orf100 (mitochondrion) (AHRD V3.3 *** YP_005090391.1)
Replicates 1_2	SL4.0ch04	59913875	59914075	64	SL4.0ch04:59913975	-13175	Solyc04g076960.4.1	Transcription factor (AHRD V3.3 *** A0A2U1NHT6_ARTAN)
Replicates 1_2	SL4.0ch06	42257859	42258059	62	SL4.0ch06:42257959	-12294	Solyc06g072300.4.1	Homeobox-leucine zipper protein ROC8 (AHRD V3.3 *** A0A2G2V7B9_CAPBA)
Replicates 1_2	SL4.0ch08	9495887	9496087	181	SL4.0ch08:9495987	-5997	Solyc08g016794.1.1	Unknown protein
Replicates 1_2	SL4.0ch00	3731687	3731887	150.3	SL4.0ch00:3731787	-3692	Solyc00g023700.2.1	orf100 (mitochondrion) (AHRD V3.3 *** YP_005090391.1)
Replicates 1_2	SL4.0ch01	74789353	74789553	62	SL4.0ch01:74789453	-8593	Solyc01g087600.3.1	Polyamine oxidase (AHRD V3.3 *** Q4H439_TOBAC)
Replicates 1_2	SL4.0ch06	20055862	20056062	46	SL4.0ch06:20055962	-212261	Solyc06g160530.1.1	Unknown protein
Replicates 1_2	SL4.0ch12	62678162	62678362	60	SL4.0ch12:62678262	-4670	Solyc12g056980.1.1	Unknown protein
Replicates 1_2	SL4.0ch03	9466461	9466661	53	SL4.0ch03:9466561	-2700	Solyc03g044600.2.1	transmembrane protein%2C putative (DUF1279) (AHRD V3.3 *** AT2G20940.2)
Replicates 1_2	SL4.0ch02	43018686	43018886	68	SL4.0ch02:43018786	-2193	Solyc02g080955.1.1	Pentatricopeptide repeat-containing protein (AHRD V3.3 *** A0A2G2XFX2_CAPBA)
Replicates 1_2	SL4.0ch12	63382852	63383052	47	SL4.0ch12:63382952	-9096	Solyc12g088420.2.1	C5orf35 (AHRD V3.3 *** AT5G23200.1)
Replicates 1_2	SL4.0ch08	9522238	9522438	111.6	SL4.0ch08:9522338	-47366	Solyc08g150111.1.1	Unknown protein
Replicates 1_2	SL4.0ch05	2256852	2257052	53	SL4.0ch05:2256952	-37	Solyc05g007740.3.1	Pentatricopeptide repeat-containing protein (AHRD V3.3 *** A0A2G3B7P9_CAPCH)
Replicates 1_2	SL4.0ch08	718828	719028	63	SL4.0ch08:718928	-3621	Solyc08g005920.3.1	F-box/kelch-repeat protein SKIP25 (AHRD V3.3 *** A0A2G2XM52_CAPBA)
Replicates 1_2	SL4.0ch04	5351113	5351313	44	SL4.0ch04:5351213	-18623	Solyc04g015160.3.1	Phosphoglycolate phosphatase (AHRD V3.3 *** A0A2G3CDP2_CAPCH)
Replicates 1_2	SL4.0ch02	52059604	52059804	62	SL4.0ch02:52059704	-17481	Solyc02g093040.4.1	tRNA-dihydrouridine synthase (AHRD V3.3 *** A0A2G3D8C2_CAPCH)
Replicates 1_2	SL4.0ch05	64991072	64991272	64	SL4.0ch05:64991172	-8754	Solyc05g056270.3.1	Aspartate--tRNA ligase
Replicates 1_2	SL4.0ch08	9515176	9515376	194	SL4.0ch08:9515276	-460	Solyc08g016796.1.1	Unknown protein
Replicates 1_2	SL4.0ch08	1672783	1672983	55	SL4.0ch08:1672883	-5586	Solyc08g007110.4.1	Haloacid dehalogenase-like hydrolase (HAD) superfamily protein (AHRD V3.3 *** A0A2U1KV95_ARTAN)
Replicates 1_2	SL4.0ch01	87099095	87099295	44.5	SL4.0ch01:87099195	-16190	Solyc01g107180.3.1	Zinc finger protein (AHRD V3.3 *** A0T3Q5_SOLTU)
Replicates 1_2	SL4.0ch04	4013537	4013737	47.4	SL4.0ch04:4013637	-2094	Solyc04g011550.2.1	pheromone-processing carboxypeptidase KEX1-like (AHRD V3.3 --* XP_022740211.1)
Replicates 1_2	SL4.0ch01	5682968	5683168	43.2	SL4.0ch01:5683068	-27792	Solyc01g010660.3.1	NAD(P)-linked oxidoreductase superfamily protein (AHRD V3.3 *** Q949S6_ARATH)
Replicates 1_2	SL4.0ch10	60148075	60148275	59.5	SL4.0ch10:60148175	-4113	Solyc10g079490.2.1	Inosine-5'-monophosphate dehydrogenase (AHRD V3.3 *** A0A2G2VW93_CAPBA)
Replicates 1_2	SL4.0ch12	64249864	64250064	52	SL4.0ch12:64249964	-2752	Solyc12g094570.1.1	inactive purple acid phosphatase-like protein (AHRD V3.3 *-* AT1G42430.1)
Replicates 1_2	SL4.0ch00	9189560	9189760	143.6	SL4.0ch00:9189660	-8403	Solyc00g500396.1.1	Unknown protein
Replicates 1_2	SL4.0ch02	47588681	47588881	46	SL4.0ch02:47588781	-4785	Solyc02g087020.1.1	NHL domain protein (AHRD V3.3 *** A0A1P8BDM5_ARATH)
Replicates 1_2	SL4.0ch09	63108638	63108838	49	SL4.0ch09:63108738	-6493	Solyc09g075060.3.1	Beta-glucosidase 1 (AHRD V3.3 *** A0A1U8F8A5_CAPAN)
Replicates 1_2	SL4.0ch01	1611816	1612016	38.9	SL4.0ch01:1611916	-13415	Solyc01g007050.4.1	BEL1-like homeodomain protein 3 (AHRD V3.3 *** A0A2G3AY56_CAPCH)
Replicates 1_2	SL4.0ch02	40673704	40673904	38.8	SL4.0ch02:40673804	-14272	Solyc02g077860.1.1	Ethylene-responsive transcription factor 4 (AHRD V3.3 *-* A0A2G3D5H4_CAPCH)
Replicates 1_2	SL4.0ch04	61796917	61797117	54	SL4.0ch04:61797017	-8288	Solyc04g079300.3.1	RNA-binding protein 47C (AHRD V3.3 *** A0A2U1PUZ3_ARTAN)
Replicates 1_2	SL4.0ch10	51080458	51080658	42	SL4.0ch10:51080558	-57711	Solyc10g051370.3.1	RNA-binding protein (AHRD V3.3 *** O24106_NICGU)
Replicates 1_2	SL4.0ch05	2255765	2255965	51	SL4.0ch05:2255865	-1124	Solyc05g007740.3.1	Mitochondrial carrier protein (AHRD V3.3 *** A0A200QP40_9MAGN)
Replicates 1_2	SL4.0ch07	60721420	60721620	51	SL4.0ch07:60721520	-28766	Solyc07g052340.4.1	Unknown protein
Replicates 1_2	SL4.0ch11	2918111	2918311	53	SL4.0ch11:2918211	-1916	Solyc11g008700.2.1	30S ribosomal protein S5 (AHRD V3.3 *** A0A1J3IX82_NOCCA)
Replicates 1_2	SL4.0ch12	2328936	2329136	37	SL4.0ch12:2329036	-5347	Solyc12g008980.3.1	O-acyltransferase (AHRD V3.3 *** A0A2G2X3X8_CAPBA)
Replicates 1_2	SL4.0ch09	753349	753549	40	SL4.0ch09:753449	-7025	Solyc09g007100.3.1	Protein MODIFIER OF SNC1 11 (AHRD V3.11 *** tr|A0A2G2VZF0|A0A2G2VZF0_CAPBA)
Replicates 1_2	SL4.0ch09	63234367	63234567	51	SL4.0ch09:63234467	-2960	Solyc09g075290.3.1	Exocyst complex component (AHRD V3.3 *** A0A2G2W0K7_CAPBA)
Replicates 1_2	SL4.0ch00	4715217	4715417	95.7	SL4.0ch00:4715317	-3157	Solyc00g500233.1.1	Unknown protein
Replicates 1_2	SL4.0ch10	55574818	55575018	45	SL4.0ch10:55574918	-10809	Solyc10g055230.1.1	Cold-shock protein (AHRD V3.3 *-* A0A200RAC1_9MAGN)
Replicates 1_2	SL4.0ch08	60770009	60770209	44.5	SL4.0ch08:60770109	-10209	Solyc08g078990.3.1	C2H2-like zinc finger protein (AHRD V3.3 *-* A0A2U1KP34_ARTAN)
Replicates 1_2	SL4.0ch01	77426869	77427069	42	SL4.0ch01:77426969	-4526	Solyc01g091580.3.1	BON1-associated protein 2-like (AHRD V3.11 *** tr|A0A2I4E3A5|A0A2I4E3A5_9ROSI)
Replicates 1_2	SL4.0ch11	53296006	53296206	42	SL4.0ch11:53296106	-2552	Solyc11g071890.3.1	GTPase LSG1-2 (AHRD V3.3 *** A0A2G3BAP2_CAPCH)
Replicates 1_2	SL4.0ch02	45106296	45106496	34.4	SL4.0ch02:45106396	-586	Solyc02g083840.1.1	Chaperone protein DnaJ (AHRD V3.3 *** A0A2G2XG76_CAPBA)
Replicates 1_2	SL4.0ch00	5079312	5079512	115	SL4.0ch00:5079412	-5748	Solyc00g019970.2.1	NADH dehydrogenase subunit 9 (AHRD V3.11 *** tr|A0A290WKX8|A0A290WKX8_SOLLC)
Replicates 1_2	SL4.0ch05	36417127	36417327	38	SL4.0ch05:36417227	-177104	Solyc05g025730.3.1	SH3 domain protein (AHRD V3.3 *** A0A2K3ME66_TRIPR)
Replicates 1_2	SL4.0ch05	2821540	2821740	37.1	SL4.0ch05:2821640	-1986	Solyc05g008420.4.1	Repressor of RNA polymerase III transcription (AHRD V3.3 *** A0A1U8F9V8_CAPAN)
Replicates 1_2	SL4.0ch11	52942867	52943067	41	SL4.0ch11:52942967	-2246	Solyc11g071360.1.1	Pentatricopeptide repeat (AHRD V3.3 *** A0A200QJM0_9MAGN)
Replicates 1_2	SL4.0ch04	57173345	57173545	40.1	SL4.0ch04:57173445	-7061	Solyc04g072240.3.1	Protein kinase superfamily protein (AHRD V3.3 *** A0A2U1PVM4_ARTAN)
Replicates 1_2	SL4.0ch01	80909509	80909709	54	SL4.0ch01:80909609	-8125	Solyc01g098020.2.1	S-adenosyl-L-methionine-dependent methyltransferases superfamily protein (AHRD V3.3 *** Q9MAA9_ARATH)
Replicates 1_2	SL4.0ch03	64045525	64045725	56	SL4.0ch03:64045625	-1900	Solyc03g121530.3.1	WAS/WASL-interacting family protein (AHRD V3.3 *** AT1G55160.1)
Replicates 1_2	SL4.0ch08	60769819	60770019	33.5	SL4.0ch08:60769919	-10019	Solyc08g078990.3.1	C2H2-like zinc finger protein (AHRD V3.3 *-* A0A2U1KP34_ARTAN)
Replicates 1_2	SL4.0ch09	63618510	63618710	46	SL4.0ch09:63618610	-1225	Solyc09g075790.3.1	long chain acyl-CoA synthetase 6
Replicates 1_2	SL4.0ch05	2583496	2583696	58	SL4.0ch05:2583596	-1422	Solyc05g008120.4.1	Unknown protein
Replicates 1_2	SL4.0ch10	59439213	59439413	43	SL4.0ch10:59439313	-15075	Solyc10g078540.3.1	Patatin (AHRD V3.3 *** A0A2G3BI67_CAPCH)
Replicates 1_2	SL4.0ch07	66611375	66611575	42.5	SL4.0ch07:66611475	-2741	Solyc07g064800.3.1	Threonine--tRNA ligase
Replicates 1_2	SL4.0ch05	4221230	4221430	36.3	SL4.0ch05:4221330	-6534	Solyc05g009950.3.1	TauD/TfdA-like domain-containing protein (AHRD V3.3 *** A0A2U1PT45_ARTAN)
Replicates 1_2	SL4.0ch00	1635431	1635631	103	SL4.0ch00:1635531	-46548	Solyc00g500088.2.1	Unknown protein
Replicates 1_2	SL4.0ch10	61818410	61818610	39.1	SL4.0ch10:61818510	-4976	Solyc10g081690.1.1	hypothetical protein (AHRD V3.3 *-* AT2G27180.1)
Replicates 1_2	SL4.0ch00	6805074	6805274	80.7	SL4.0ch00:6805174	-57887	Solyc00g500290.2.1	Unknown protein
Replicates 1_2	SL4.0ch01	80488119	80488319	45	SL4.0ch01:80488219	-6455	Solyc01g097320.3.1	Light-inducible protein CPRF2 (AHRD V3.3 *** A0A2G2W7C8_CAPBA)
Replicates 1_2	SL4.0ch08	9450229	9450429	155	SL4.0ch08:9450329	-45343	Solyc08g016791.1.1	Unknown protein
Replicates 1_2	SL4.0ch02	49847132	49847332	36	SL4.0ch02:49847232	-22542	Solyc02g090130.4.1	Oligopeptidase B (AHRD V3.3 *** A0A2I0V9Y9_9ASPA)
Replicates 1_2	SL4.0ch10	51040286	51040486	36	SL4.0ch10:51040386	-17539	Solyc10g051370.3.1	RNA-binding protein (AHRD V3.3 *-* O24106_NICGU)
Replicates 1_2	SL4.0ch04	7832524	7832724	47	SL4.0ch04:7832624	-6772	Solyc04g017720.3.1	Zinc finger transcription factor 32
Replicates 1_2	SL4.0ch05	2178657	2178857	48.7	SL4.0ch05:2178757	-64	Solyc05g007590.5.1	Aminotransferase
Replicates 1_2	SL4.0ch12	2519069	2519269	31.9	SL4.0ch12:2519169	-8525	Solyc12g009170.2.1	Inter-alpha-trypsin inhibitor heavy chain-like protein (AHRD V3.3 *** Q8L798_ARATH)
Replicates 1_2	SL4.0ch04	61896428	61896628	35	SL4.0ch04:61896528	-4227	Solyc04g079400.3.1	Protein OSB1
Replicates 1_2	SL4.0ch05	59828195	59828395	46	SL4.0ch05:59828295	-721	Solyc05g050310.1.1	Glycosyl hydrolase superfamily protein (AHRD V3.3 *** A0A2U1QD96_ARTAN)
Replicates 1_2	SL4.0ch08	2649915	2650115	37.8	SL4.0ch08:2650015	-6242	Solyc08g008160.4.1	Calcium-dependent protein kinase (AHRD V3.3 *** B2KTA5_WHEAT)
Replicates 1_2	SL4.0ch08	9504536	9504736	135.9	SL4.0ch08:9504636	-3304	Solyc08g150110.1.1	Unknown protein
Replicates 1_2	SL4.0ch01	1368264	1368464	30.7	SL4.0ch01:1368364	-465	Solyc01g006780.4.1	Unknown protein
Replicates 1_2	SL4.0ch08	9423940	9424140	85	SL4.0ch08:9424040	-19054	Solyc08g016791.1.1	Unknown protein
Replicates 1_2	SL4.0ch08	60106089	60106289	39.7	SL4.0ch08:60106189	-11987	Solyc08g078160.3.1	Ethylene-responsive transcription factor 2 (AHRD V3.3 *** A0A2G3DC56_CAPCH)
Replicates 1_2	SL4.0ch01	73901061	73901261	45	SL4.0ch01:73901161	-4958	Solyc01g086700.4.1	Sister chromatid cohesion 1 protein 4 (AHRD V3.3 *** A0A2G3DGK5_CAPCH)
Replicates 1_2	SL4.0ch09	57705928	57706128	34	SL4.0ch09:57706028	-35541	Solyc09g064380.3.1	hypothetical protein (AHRD V3.3 *-* AT4G28690.2)
Replicates 1_2	SL4.0ch02	37097670	37097870	37	SL4.0ch02:37097770	-3831	Solyc02g069130.3.1	zinc finger protein ZPR1-like (AHRD V3.3 *** A0A2I4F7X7_9ROSI)
Replicates 1_2	SL4.0ch00	4731082	4731282	93	SL4.0ch00:4731182	-81712	Solyc00g160460.1.1	Unknown protein
Replicates 1_2	SL4.0ch10	61992710	61992910	29.4	SL4.0ch10:61992810	-6772	Solyc10g081980.2.1	Late embryogenesis abundant (LEA) hydroxyproline-rich glycoprotein family (AHRD V3.11 *** tr|Q9SVC8|Q9SVC8_ARATH)
Replicates 1_2	SL4.0ch06	44106053	44106253	39	SL4.0ch06:44106153	-1115	Solyc06g074940.5.1	heavy metal-associated isoprenylated plant protein 3-like (AHRD V3.11 *** tr|A0A1U8H726|A0A1U8H726_CAPAN)
Replicates 1_2	SL4.0ch00	591793	591993	70.8	SL4.0ch00:591893	-36227	Solyc00g500014.1.1	Unknown protein
Replicates 1_2	SL4.0ch03	937091	937291	36	SL4.0ch03:937191	-19140	Solyc03g006350.3.1	Ethylene-responsive transcription factor 4 (AHRD V3.3 *-* A0A2G2VSG2_CAPBA)
Replicates 1_2	SL4.0ch09	640707	640907	36	SL4.0ch09:640807	-3424	Solyc09g005910.4.1	Lung seven transmembrane receptor family protein (AHRD V3.11 *** tr|A0A2U1P555|A0A2U1P555_ARTAN)
Replicates 1_2	SL4.0ch04	26607806	26608006	33	SL4.0ch04:26607906	-114	Solyc04g024960.1.1	Unknown protein
Replicates 1_2	SL4.0ch05	1365467	1365667	32.9	SL4.0ch05:1365567	-6844	Solyc05g006640.4.1	bHLH transcription factor 036
Replicates 1_2	SL4.0ch07	61680728	61680928	32.5	SL4.0ch07:61680828	-12842	Solyc07g053290.3.1	Ketol-acid reductoisomerase (AHRD V3.3 *** K4CFM5_SOLLC)
Replicates 1_2	SL4.0ch01	89942735	89942935	46	SL4.0ch01:89942835	-3190	Solyc01g111280.3.1	Cold-shock protein (AHRD V3.3 *-* A0A200RAC1_9MAGN)
Replicates 1_2	SL4.0ch02	44629612	44629812	46	SL4.0ch02:44629712	-6158	Solyc02g083120.3.1	DUF641 domain-containing protein (AHRD V3.3 *** A0A1Q3C2N9_CEPFO)
Replicates 1_2	SL4.0ch01	208953	209153	41	SL4.0ch01:209053	-688	Solyc01g005253.1.1	Aspartate-semialdehyde dehydrogenase (AHRD V3.11 *** tr|A0A2G3AYJ3|A0A2G3AYJ3_CAPCH)
Replicates 1_2	SL4.0ch04	59289801	59290001	41	SL4.0ch04:59289901	-7930	Solyc04g076380.4.1	Cysteine--tRNA ligase (AHRD V3.3 *** A0A1J3GNV7_NOCCA)
Replicates 1_2	SL4.0ch07	860024	860224	41	SL4.0ch07:860124	-17706	Solyc07g006050.4.1	Tetratricopeptide repeat (TPR)-like superfamily protein (AHRD V3.3 *** A0A2U1MFU8_ARTAN)
Replicates 1_2	SL4.0ch10	945107	945307	41	SL4.0ch10:945207	-2479	Solyc10g006460.3.1	COBRA-like protein 10 (AHRD V3.3 *** A0A2G3ATH9_CAPCH)
Replicates 1_2	SL4.0ch05	23614215	23614415	48	SL4.0ch05:23614315	-329322	Solyc05g018810.5.1	RING/U-box superfamily protein (AHRD V3.3 *-* Q3EAE6_ARATH)
Replicates 1_2	SL4.0ch02	43029877	43030077	38	SL4.0ch02:43029977	-20502	Solyc02g080930.3.1	Core-2 i-branching beta-n-acetylglucosaminyltransferase family protein (AHRD V3.3 *-* A0A2K3MVY8_TRIPR)
Replicates 1_2	SL4.0ch02	44211216	44211416	29	SL4.0ch02:44211316	-8697	Solyc02g082550.3.1	Calcium-binding EF hand family protein (AHRD V3.3 *** A0A1P8AQ08_ARATH)
Replicates 1_2	SL4.0ch00	9250731	9250931	57.7	SL4.0ch00:9250831	-3086	Solyc00g500402.1.1	Unknown protein
Replicates 1_2	SL4.0ch04	61011319	61011519	34.8	SL4.0ch04:61011419	-4880	Solyc04g078240.3.1	metal transporter Nramp2
Replicates 1_2	SL4.0ch01	90704660	90704860	32	SL4.0ch01:90704760	-5242	Solyc01g112280.3.1	Glutamate--tRNA ligase
Replicates 1_2	SL4.0ch10	1494604	1494804	31.1	SL4.0ch10:1494704	-189	Solyc10g007160.2.1	transcription factor GTE4-like (AHRD V3.3 *-* XP_022985931.1)
Replicates 1_2	SL4.0ch06	36521916	36522116	40	SL4.0ch06:36522016	-7643	Solyc06g060810.3.1	Homeobox-leucine zipper protein HAT2 (AHRD V3.3 *** A0A2G2WJU4_CAPBA)
Replicates 1_2	SL4.0ch09	64116672	64116872	25	SL4.0ch09:64116772	-19593	Solyc09g082190.1.1	Folate-biopterin transporter 1
Replicates 1_2	SL4.0ch01	74214917	74215117	37	SL4.0ch01:74215017	-9864	Solyc01g087030.3.1	Photosystem II PsbP (AHRD V3.3 *** A0A200Q959_9MAGN)
Replicates 1_2	SL4.0ch05	4221404	4221604	27.6	SL4.0ch05:4221504	-6708	Solyc05g009950.3.1	TauD/TfdA-like domain-containing protein (AHRD V3.3 *** A0A2U1PT45_ARTAN)
Replicates 1_2	SL4.0ch08	9491533	9491733	109	SL4.0ch08:9491633	-10351	Solyc08g016794.1.1	Unknown protein
Replicates 1_2	SL4.0ch00	570677	570877	131	SL4.0ch00:570777	-18562	Solyc00g500013.1.1	Unknown protein
Replicates 1_2	SL4.0ch02	49007568	49007768	34	SL4.0ch02:49007668	-9297	Solyc02g089065.1.1	Methyl esterase 11 (AHRD V3.3 *** A0A2U1LRP6_ARTAN)
Replicates 1_2	SL4.0ch08	60160565	60160765	31	SL4.0ch08:60160665	-9258	Solyc08g078230.4.1	PPPDE putative thiol peptidase family protein (AHRD V3.3 *** A0A2U1KMT1_ARTAN)
Replicates 1_2	SL4.0ch02	33632637	33632837	39	SL4.0ch02:33632737	-8717	Solyc02g063520.4.1	hypothetical protein (AHRD V3.3 *-* AT5G67020.1)
Replicates 1_2	SL4.0ch09	1627253	1627453	39	SL4.0ch09:1627353	-408	Solyc09g008130.3.1	Membrane magnesium transporter (AHRD V3.3 *** A0A1U8EHI1_CAPAN)
Replicates 1_2	SL4.0ch06	47061018	47061218	38.3	SL4.0ch06:47061118	-622	Solyc06g084325.1.1	EID1-like F-box protein 3 (AHRD V3.3 *** A0A2G2ZF18_CAPAN)
Replicates 1_2	SL4.0ch02	35539519	35539719	41	SL4.0ch02:35539619	-33357	Solyc02g067350.3.1	Zinc-finger homeodomain protein 10 (AHRD V3.3 *** A0A2G3D3J7_CAPCH)
Replicates 1_2	SL4.0ch12	2573002	2573202	36	SL4.0ch12:2573102	-4097	Solyc12g009230.3.1	Ethylene-responsive transcription factor (AHRD V3.3 *-* A0A2G3BP26_CAPCH)
Replicates 1_2	SL4.0ch05	485005	485205	42.7	SL4.0ch05:485105	-1597	Solyc05g005630.4.1	RNA-binding protein 25-like (AHRD V3.3 *** A0A2K3LLK7_TRIPR)
Replicates 1_2	SL4.0ch03	58474731	58474931	27	SL4.0ch03:58474831	-8190	Solyc03g113990.4.1	Pentatricopeptide repeat-containing protein (AHRD V3.3 *** A0A2U1Q882_ARTAN)
Replicates 1_2	SL4.0ch06	43007463	43007663	26.7	SL4.0ch06:43007563	-22113	Solyc06g073520.3.1	La-related protein 1 (AHRD V3.3 *** A0A2G3CAE9_CAPCH)
Replicates 1_2	SL4.0ch00	6804915	6805115	62.2	SL4.0ch00:6805015	-58046	Solyc00g500290.2.1	Unknown protein
Replicates 1_2	SL4.0ch01	87759344	87759544	29.2	SL4.0ch01:87759444	-7108	Solyc01g108100.3.1	Spire
Replicates 1_2	SL4.0ch00	4728761	4728961	107	SL4.0ch00:4728861	-79391	Solyc00g160460.1.1	Unknown protein
Replicates 1_2	SL4.0ch01	82906781	82906981	40	SL4.0ch01:82906881	-12000	Solyc01g100670.1.1	NHL repeat-containing protein 2-like (AHRD V3.3 *** A0A2K3NND0_TRIPR)
Replicates 1_2	SL4.0ch01	75489380	75489580	35	SL4.0ch01:75489480	-2988	Solyc01g088440.2.1	RING/U-box superfamily protein (AHRD V3.11 *-* tr|A0A2U1KCN8|A0A2U1KCN8_ARTAN)
Replicates 1_2	SL4.0ch12	65812559	65812759	35	SL4.0ch12:65812659	-8283	Solyc12g098950.2.1	Guanosine-3'5'-bis(Diphosphate) 3'-pyrophosphohydrolase (AHRD V3.3 *** E5GC47_CUCME)
Replicates 1_2	SL4.0ch08	9435567	9435767	108	SL4.0ch08:9435667	-9136	Solyc08g150109.1.1	Unknown protein
Replicates 1_2	SL4.0ch12	1561802	1562002	32	SL4.0ch12:1561902	-14364	Solyc12g007100.2.1	Signal peptidase I (AHRD V3.3 *** B2J5A2_NOSP7)
Replicates 1_2	SL4.0ch07	2536826	2537026	31.6	SL4.0ch07:2536926	-10220	Solyc07g007880.1.1	CCR4-NOT transcription complex subunit 10-like (AHRD V3.3 *** A0A2I4EMI0_9ROSI)
Replicates 1_2	SL4.0ch05	56536001	56536201	37	SL4.0ch05:56536101	-33	Solyc05g044620.3.1	Unknown protein
Replicates 1_2	SL4.0ch08	50483943	50484143	37	SL4.0ch08:50484043	-4045	Solyc08g150129.1.1	Heat shock transcription factor (AHRD V3.11 *-* tr|A0A1Y1I763|A0A1Y1I763_KLENI)
Replicates 1_2	SL4.0ch09	66796129	66796329	37	SL4.0ch09:66796229	-1408	Solyc09g091410.2.1	Inosine triphosphate pyrophosphatase (AHRD V3.3 *** A0A2G2W1Y2_CAPBA)
Replicates 1_2	SL4.0ch07	63285812	63286012	36	SL4.0ch07:63285912	-12379	Solyc07g055300.3.1	WRKY transcription factor 78
Replicates 1_2	SL4.0ch00	3716026	3716226	98	SL4.0ch00:3716126	-10356	Solyc00g094550.1.1	Zinc finger protein KNUCKLES (AHRD V3.3 *** A0A2G3ACW4_CAPAN)
Replicates 1_2	SL4.0ch03	4907056	4907256	39	SL4.0ch03:4907156	-5042	Solyc03g033490.3.1	Cold-shock protein (AHRD V3.3 *-* A0A200RAC1_9MAGN)
Replicates 1_2	SL4.0ch03	63866696	63866896	39	SL4.0ch03:63866796	-2255	Solyc03g121270.3.1	23S rRNA (Uracil-5-)-methyltransferase rumA (AHRD V3.3 *** A0A2K3PEV5_TRIPR)
Replicates 1_2	SL4.0ch07	341797	341997	39	SL4.0ch07:341897	-15428	Solyc07g005440.1.1	RNA polymerase II C-terminal domain phosphatase-like 4 (AHRD V3.3 *** A0A2G2WAZ5_CAPBA)
Replicates 1_2	SL4.0ch08	9511456	9511656	149	SL4.0ch08:9511556	-4180	Solyc08g016796.1.1	Unknown protein
Replicates 1_2	SL4.0ch04	57561354	57561554	34	SL4.0ch04:57561454	-10205	Solyc04g072640.3.1	structural constituent of ribosome (AHRD V3.3 *-* AT1G22110.3)
Replicates 1_2	SL4.0ch10	59689161	59689361	34	SL4.0ch10:59689261	-8475	Solyc10g078940.2.1	Activator of 90 kDa heat shock protein ATPase-like protein 1 (AHRD V3.3 *** A0A1J3GDI7_NOCCA)
Replicates 1_2	SL4.0ch10	63592810	63593010	34	SL4.0ch10:63592910	-5707	Solyc10g085140.2.1	Alkyl transferase (AHRD V3.3 *** K4D3U9_SOLLC)
Replicates 1_2	SL4.0ch04	62252805	62253005	33.5	SL4.0ch04:62252905	-5568	Solyc04g079970.3.1	geranylgeranyl pyrophosphate synthase 2
Replicates 1_2	SL4.0ch08	1702632	1702832	41	SL4.0ch08:1702732	-5245	Solyc08g007130.5.1	SBP (S-ribonuclease binding protein) family protein (AHRD V3.3 *** Q8LCK5_ARATH)
Replicates 1_2	SL4.0ch04	2106837	2107037	45	SL4.0ch04:2106937	-1128	Solyc04g008460.4.1	Potassium transporter (AHRD V3.3 *** A0A2G3CF51_CAPCH)
Replicates 1_2	SL4.0ch03	54186167	54186367	31	SL4.0ch03:54186267	-24021	Solyc03g097310.3.1	DB199
Replicates 1_2	SL4.0ch03	64151425	64151625	31	SL4.0ch03:64151525	-6873	Solyc03g121610.3.1	Late embryogenesis abundant (LEA) hydroxyproline-rich glycoprotein family (AHRD V3.3 *** A0A2U1MMJ0_ARTAN)
Replicates 1_2	SL4.0ch02	41006593	41006793	30.9	SL4.0ch02:41006693	-24045	Solyc02g078250.4.1	DNA ligase-like protein (AHRD V3.3 *** AT2G33793.2)
Replicates 1_2	SL4.0ch00	9101817	9102017	30.2	SL4.0ch00:9101917	-21870	Solyc00g500388.1.1	Unknown protein
Replicates 1_2	SL4.0ch08	54575576	54575776	36	SL4.0ch08:54575676	-12239	Solyc08g067450.1.1	DNAse I-like superfamily protein (AHRD V3.3 *-* A0A178UDZ2_ARATH)
Replicates 1_2	SL4.0ch12	1520044	1520244	24.6	SL4.0ch12:1520144	-9544	Solyc12g160520.1.1	Heat shock transcription factor (AHRD V3.3 *-* A0A1Y1I763_KLENI)
Replicates 1_2	SL4.0ch00	592057	592257	61.5	SL4.0ch00:592157	-35963	Solyc00g500014.1.1	Unknown protein
Replicates 1_2	SL4.0ch01	87505701	87505901	28	SL4.0ch01:87505801	-9187	Solyc01g107740.3.1	phosphatidylinositol 3
Replicates 1_2	SL4.0ch09	405211	405411	28	SL4.0ch09:405311	-1233	Solyc09g005590.3.1	SelT-like protein (AHRD V3.11 *-* tr|A0A2G3BKB5|A0A2G3BKB5_CAPCH)
Replicates 1_2	SL4.0ch03	3705596	3705796	27.9	SL4.0ch03:3705696	-13483	Solyc03g026260.4.1	Dehydration-responsive element-binding transcription factor (AHRD V3.3 *** A0A1S6M2D0_9CARY)
Replicates 1_2	SL4.0ch01	84738489	84738689	38	SL4.0ch01:84738589	-6129	Solyc01g103960.3.1	Bifunctional hydroxymethylpyrimidine kinase/phosphomethylpyrimidine kinase (AHRD V3.3 *** A0A2Z4MGS9_BREBE)
Replicates 1_2	SL4.0ch10	60147872	60148072	37.5	SL4.0ch10:60147972	-3910	Solyc10g079490.2.1	Inosine-5'-monophosphate dehydrogenase (AHRD V3.3 *** A0A2G2VW93_CAPBA)
Replicates 1_2	SL4.0ch03	47858756	47858956	40	SL4.0ch03:47858856	-11045	Solyc03g083420.4.1	Histone-lysine N-methyltransferase (AHRD V3.3 *** A0A2G2ZZR3_CAPAN)
Replicates 1_2	SL4.0ch04	56980887	56981087	39.7	SL4.0ch04:56980987	-18459	Solyc04g072040.1.1	LRR receptor-like kinase (AHRD V3.3 *** A0A072VNN3_MEDTR)
Replicates 1_2	SL4.0ch06	43692477	43692677	33	SL4.0ch06:43692577	-9164	Solyc06g074410.4.1	Proteinaceous RNase P 2 (AHRD V3.3 *** A0A1U8H3H4_CAPAN)
Replicates 1_2	SL4.0ch07	58982300	58982500	33	SL4.0ch07:58982400	-3634	Solyc07g047860.4.1	Unknown protein
Replicates 1_2	SL4.0ch12	59846300	59846500	33	SL4.0ch12:59846400	-10956	Solyc12g044830.1.1	WAS/WASL-interacting family protein (AHRD V3.3 *** AT1G55160.1)
Replicates 1_2	SL4.0ch09	66439970	66440170	24	SL4.0ch09:66440070	-3633	Solyc09g090940.3.1	RNA-binding (RRM/RBD/RNP motifs) family protein (AHRD V3.3 *** A0A2U1N2D5_ARTAN)
Replicates 1_2	SL4.0ch04	1137306	1137506	42	SL4.0ch04:1137406	-1967	Solyc04g007430.2.1	bHLH transcription factor 031
Replicates 1_2	SL4.0ch06	38249124	38249324	42	SL4.0ch06:38249224	-11953	Solyc06g065073.1.1	R2R3MYB transcription factor 3
Replicates 1_2	SL4.0ch00	9139547	9139747	94	SL4.0ch00:9139647	-1486	Solyc00g500391.1.1	Unknown protein
Replicates 1_2	SL4.0ch08	9396653	9396853	94	SL4.0ch08:9396753	-17522	Solyc08g016792.1.1	Unknown protein
Replicates 1_2	SL4.0ch00	1595811	1596011	47.6	SL4.0ch00:1595911	-6928	Solyc00g500088.2.1	Unknown protein
Replicates 1_2	SL4.0ch04	55890793	55890993	35	SL4.0ch04:55890893	-7237	Solyc04g071150.3.1	Basic-leucine zipper (BZIP) transcription factor family protein (AHRD V3.3 *-* Q8H1F0_ARATH)
Replicates 1_2	SL4.0ch04	60358407	60358607	35	SL4.0ch04:60358507	-13412	Solyc04g077440.4.1	Amino acid transporter (AHRD V3.3 *** A0A200PPZ9_9MAGN)
Replicates 1_2	SL4.0ch05	62886049	62886249	35	SL4.0ch05:62886149	-7398	Solyc05g053380.5.1	Glycosyltransferase (AHRD V3.3 *** A0A0A1WC49_NICAT)
Replicates 1_2	SL4.0ch11	50038006	50038206	35	SL4.0ch11:50038106	-128	Solyc11g066280.3.1	ribosome production factor 1 (AHRD V3.3 *** A0A2I4FRK6_9ROSI)
Replicates 1_2	SL4.0ch03	61611844	61612044	34.2	SL4.0ch03:61611944	-7902	Solyc03g118255.1.1	Magnesium-protoporphyrin IX methyltransferase (AHRD V3.11 *** tr|A0A1P8B4G1|A0A1P8B4G1_ARATH)
Replicates 1_2	SL4.0ch01	71887844	71888044	30	SL4.0ch01:71887944	-17939	Solyc01g080150.3.1	UPF0613 protein PB24D3.06c (AHRD V3.3 *** A0A1J3GSX0_NOCCA)
Replicates 1_2	SL4.0ch06	42612894	42613094	30	SL4.0ch06:42612994	-4615	Solyc06g072920.3.1	Aluminum-activated malate transporter 9 (AHRD V3.3 *-* A0A2D1A7Z5_SOLLC)
Replicates 1_2	SL4.0ch05	59176442	59176642	24	SL4.0ch05:59176542	-21460	Solyc05g049970.3.1	Small nuclear ribonucleoprotein-associated protein (AHRD V3.3 *-* A0A2G2YXL6_CAPAN)
Replicates 1_2	SL4.0ch11	53619887	53620087	27	SL4.0ch11:53619987	-736	Solyc11g072350.1.1	CC-NBS-LRR type resistance-like protein (AHRD V3.3 *-* E3W9R6_CAPCH)
Replicates 1_2	SL4.0ch02	41387727	41387927	37	SL4.0ch02:41387827	-89	Solyc02g078760.1.1	hypothetical protein (AHRD V3.3 *** AT1G11125.1)
Replicates 1_2	SL4.0ch03	57140347	57140547	37	SL4.0ch03:57140447	-13446	Solyc03g112230.4.1	Unknown protein
Replicates 1_2	SL4.0ch07	61044600	61044800	39	SL4.0ch07:61044700	-7926	Solyc07g052690.4.1	lysine-rich arabinogalactan protein 19 (AHRD V3.3 *-* XP_010324089.1)
Replicates 1_2	SL4.0ch10	60432994	60433194	39	SL4.0ch10:60433094	-26093	Solyc10g079870.3.1	Peptide chain release factor 2-like protein (AHRD V3.3 *** A0A2K3N7D8_TRIPR)
Replicates 1_2	SL4.0ch05	65171200	65171400	28.3	SL4.0ch05:65171300	-11615	Solyc05g056490.4.1	S-adenosyl-L-methionine-dependent methyltransferases superfamily protein (AHRD V3.11 *** tr|A0A2U1MCW0|A0A2U1MCW0_ARTAN)
Replicates 1_2	SL4.0ch01	88906111	88906311	41	SL4.0ch01:88906211	-9140	Solyc01g109670.3.1	meloidogyne-induced giant cell protein DB275
Replicates 1_2	SL4.0ch08	2498208	2498408	41	SL4.0ch08:2498308	-8632	Solyc08g007980.3.1	RNA-binding protein NOB1 (AHRD V3.3 *** A0A2K3NS65_TRIPR)
Replicates 1_2	SL4.0ch06	38288596	38288796	33.5	SL4.0ch06:38288696	-16794	Solyc06g065160.1.1	TCP transcription factor 13
Replicates 1_2	SL4.0ch03	4089133	4089333	29	SL4.0ch03:4089233	-10644	Solyc03g031700.5.1	RNA-binding protein (AHRD V3.3 *** A0A2K3PBB6_TRIPR)
Replicates 1_2	SL4.0ch10	63759165	63759365	28.3	SL4.0ch10:63759265	0	Solyc10g085410.3.1	Cactin (AHRD V3.3 *** A0A2G3BFE1_CAPCH)
Replicates 1_2	SL4.0ch05	62187291	62187491	36	SL4.0ch05:62187391	-8226	Solyc05g052590.1.1	CTD small phosphatase-like protein (AHRD V3.3 *** A0A1J3CDK2_NOCCA)
Replicates 1_2	SL4.0ch05	4221563	4221763	35.1	SL4.0ch05:4221663	-6867	Solyc05g009950.3.1	Protein decapping 5 (AHRD V3.3 *** A0A2G3B6L4_CAPCH)
Replicates 1_2	SL4.0ch05	659494	659694	24	SL4.0ch05:659594	-629	Solyc05g005790.4.1	Threonine--tRNA ligase
Replicates 1_2	SL4.0ch11	52600560	52600760	22.3	SL4.0ch11:52600660	-6820	Solyc11g069950.2.1	Glutaredoxin (AHRD V3.3 *** A0A118JSL8_CYNCS)
Replicates 1_2	SL4.0ch01	5378120	5378320	26	SL4.0ch01:5378220	-13945	Solyc01g010470.2.1	Glycine-rich protein (AHRD V3.11 *** tr|Q9LFX8|Q9LFX8_ARATH)
Replicates 1_2	SL4.0ch04	4425582	4425782	26	SL4.0ch04:4425682	-3797	Solyc04g012070.3.1	Ribonucleoside-diphosphate reductase (AHRD V3.3 *** A0A1U8FDK5_CAPAN)
Replicates 1_2	SL4.0ch04	58631494	58631694	26	SL4.0ch04:58631594	-32841	Solyc04g074710.3.1	Blue copper protein (AHRD V3.11 *** tr|A0A2G2ZQN6|A0A2G2ZQN6_CAPAN)
Replicates 1_2	SL4.0ch05	12196716	12196916	26	SL4.0ch05:12196816	-18438	Solyc05g015815.1.1	Unknown protein
Replicates 1_2	SL4.0ch06	39884227	39884427	26	SL4.0ch06:39884327	-986	Solyc06g068190.2.1	Ubiquitin system component Cue protein (AHRD V3.3 --* AT5G32440.3)
Replicates 1_2	SL4.0ch01	87527035	87527235	25	SL4.0ch01:87527135	-13057	Solyc01g107760.5.1	glucuronoxylan 4-O-methyltransferase 1-like (AHRD V3.3 *** A0A2I4H011_9ROSI)
Replicates 1_2	SL4.0ch04	57007027	57007227	32.5	SL4.0ch04:57007127	-1	Solyc04g072043.1.1	Polyadenylate-binding protein (AHRD V3.3 *** A0A2G3CN64_CAPCH)
Replicates 1_2	SL4.0ch10	3707324	3707524	38	SL4.0ch10:3707424	-9536	Solyc10g011660.3.1	Auxin-responsive GH3 family protein (AHRD V3.3 *** A0A2U1NZC8_ARTAN)
Replicates 1_2	SL4.0ch10	62919194	62919394	22.1	SL4.0ch10:62919294	-6392	Solyc10g084110.2.1	RING/U-box superfamily protein (AHRD V3.3 *** A0A2U1PM96_ARTAN)
Replicates 1_2	SL4.0ch00	6985051	6985251	46	SL4.0ch00:6985151	-2699	Solyc00g500306.1.1	Unknown protein
Replicates 1_2	SL4.0ch06	1199586	1199786	31	SL4.0ch06:1199686	-789	Solyc06g007130.5.1.1	omega-3 fatty acid desaturase -3
Replicates 1_2	SL4.0ch08	2649765	2649965	30.2	SL4.0ch08:2649865	-6092	Solyc08g008160.4.1	Calcium-dependent protein kinase (AHRD V3.3 *** B2KTA5_WHEAT)
Replicates 1_2	SL4.0ch01	1611607	1611807	30.1	SL4.0ch01:1611707	-13206	Solyc01g007050.4.1	BEL1-like homeodomain protein 3 (AHRD V3.3 *** A0A2G3AY56_CAPCH)
Replicates 1_2	SL4.0ch04	55378508	55378708	30.1	SL4.0ch04:55378608	-2826	Solyc04g064870.3.1	MADS-box transcription factor 23 (AHRD V3.3 *** A0A2G2Y5S9_CAPAN)
Replicates 1_2	SL4.0ch01	2338963	2339163	33	SL4.0ch01:2339063	-4891	Solyc01g008290.3.1	Prefoldin subunit 5 (AHRD V3.3 *** B6TVU2_MAIZE)
Replicates 1_2	SL4.0ch03	49583793	49583993	33	SL4.0ch03:49583893	-43549	Solyc03g160390.1.1	ethylene response factor A.2
Replicates 1_2	SL4.0ch00	1646439	1646639	69.1	SL4.0ch00:1646539	-57556	Solyc00g500088.2.1	Unknown protein
Replicates 1_2	SL4.0ch06	40453370	40453570	28	SL4.0ch06:40453470	-3287	Solyc06g069020.5.1	LeArcA1 protein containing 7 WD40 repeats
Replicates 1_2	SL4.0ch09	63253134	63253334	28	SL4.0ch09:63253234	-18669	Solyc09g075280.2.1	RING-H2 finger protein ATL5-like (AHRD V3.3 *** A0A2I4EZH4_9ROSI)
Replicates 1_2	SL4.0ch06	39922034	39922234	27.8	SL4.0ch06:39922134	-11857	Solyc06g068240.3.1	Tetratricopeptide repeat (TPR)-like superfamily protein (AHRD V3.3 *** A0A2U1MYN5_ARTAN)
Replicates 1_2	SL4.0ch11	53506515	53506715	27.5	SL4.0ch11:53506615	-2411	Solyc11g072220.2.1	Ubiquitin-like-specific protease 1D (AHRD V3.3 *-* A0A1J3EWQ3_NOCCA)
Replicates 1_2	SL4.0ch10	57410894	57411094	35	SL4.0ch10:57410994	-79405	Solyc10g074690.2.1	Calcium-binding protein CAST (AHRD V3.3 *** A0A1U8EHD5_CAPAN)
Replicates 1_2	SL4.0ch11	52471472	52471672	35	SL4.0ch11:52471572	-24616	Solyc11g069765.1.1	P-loop NTPase domain-containing protein LPA1-like protein 1 (AHRD V3.3 *** A0A2G3BBZ6_CAPCH)
Replicates 1_2	SL4.0ch08	9521816	9522016	78.4	SL4.0ch08:9521916	-47788	Solyc08g150111.1.1	Unknown protein
Replicates 1_2	SL4.0ch08	61870300	61870500	25	SL4.0ch08:61870400	-6027	Solyc08g080480.3.1	SUN-like protein 23
Replicates 1_2	SL4.0ch10	61493811	61494011	25	SL4.0ch10:61493911	-11278	Solyc10g081280.2.1	Protein DETOXIFICATION (AHRD V3.3 *** A0A2G3BHA5_CAPCH)
Replicates 1_2	SL4.0ch05	1365624	1365824	24.1	SL4.0ch05:1365724	-7001	Solyc05g006640.4.1	bHLH transcription factor 036
Replicates 1_2	SL4.0ch03	2170364	2170564	22	SL4.0ch03:2170464	-326	Solyc03g007600.3.1	Pentatricopeptide repeat (PPR) superfamily protein (AHRD V3.3 *** A0A2U1LU47_ARTAN)
Replicates 1_2	SL4.0ch00	9140391	9140591	94	SL4.0ch00:9140491	-2330	Solyc00g500391.1.1	Unknown protein
Replicates 1_2	SL4.0ch01	74774172	74774372	30	SL4.0ch01:74774272	-6760	Solyc01g087570.2.1	hypothetical protein Chr3
Replicates 1_2	SL4.0ch04	63887554	63887754	30	SL4.0ch04:63887654	-11077	Solyc04g082150.1.1	Pseudouridine synthase family protein (AHRD V3.11 *** tr|A0A2U1N9V5|A0A2U1N9V5_ARTAN)
Replicates 1_2	SL4.0ch03	7734897	7735097	29.5	SL4.0ch03:7734997	-7941	Solyc03g044200.3.1	FAD dependent oxidoreductase (AHRD V3.3 *** A0A200PV18_9MAGN)
Replicates 1_2	SL4.0ch03	4470731	4470931	29.5	SL4.0ch03:4470831	-5268	Solyc03g032065.1.1	RING/U-box superfamily protein (AHRD V3.3 *** A0A2U1LI04_ARTAN)
Replicates 1_2	SL4.0ch03	57912139	57912339	32	SL4.0ch03:57912239	-4426	Solyc03g113320.1.1	Nodulin-like / Major Facilitator Superfamily protein (AHRD V3.3 *** A0A2U1M3G7_ARTAN)
Replicates 1_2	SL4.0ch07	1620702	1620902	32	SL4.0ch07:1620802	-1182	Solyc07g006800.1.1	Adenosylmethionine-8-amino-7-oxononanoate aminotransferase (AHRD V3.3 *** S8C9K2_9LAMI)
Replicates 1_2	SL4.0ch03	4402331	4402531	34	SL4.0ch03:4402431	-15954	Solyc03g031990.4.1	3-hydroxy-3-methylglutaryl-coenzyme A reductase 3 (AHRD V3.11 *** sp|Q41438|HMDH3_SOLTU)
Replicates 1_2	SL4.0ch05	1977240	1977440	34	SL4.0ch05:1977340	-58148	Solyc05g007230.4.1	Ribulose-phosphate 3-epimerase (AHRD V3.3 *** A0A328DMM8_9ASTE)
Replicates 1_2	SL4.0ch10	88804	89004	34	SL4.0ch10:88904	-2213	Solyc10g005280.1.1	RNA-binding protein (AHRD V3.3 *** A0A2K3PBB6_TRIPR)
Replicates 1_2	SL4.0ch11	53936031	53936231	34	SL4.0ch11:53936131	-11948	Solyc11g072627.1.1	Zinc-binding dehydrogenase (AHRD V3.3 *** A0A162PTR1_9PEZI)
Replicates 1_2	SL4.0ch05	61792750	61792950	27	SL4.0ch05:61792850	-6502	Solyc05g052060.2.1	DNA-binding protein Pti4
Replicates 1_2	SL4.0ch07	63229936	63230136	27	SL4.0ch07:63230036	-13797	Solyc07g055215.1.1	SlSK
Replicates 1_2	SL4.0ch12	64845457	64845657	26.3	SL4.0ch12:64845557	-1394	Solyc12g096380.1.1	Peptidyl-tRNA hydrolase II (PTH2) family protein (AHRD V3.3 *-* Q9FT62_ARATH)
Replicates 1_2	SL4.0ch04	56981000	56981200	32.3	SL4.0ch04:56981100	-18346	Solyc04g072040.1.1	LRR receptor-like kinase (AHRD V3.3 *** A0A072VNN3_MEDTR)
Replicates 1_2	SL4.0ch04	2219961	2220161	36	SL4.0ch04:2220061	-4848	Solyc04g008590.3.1	Ankyrin repeat (AHRD V3.3 *** A0A200R764_9MAGN)
Replicates 1_2	SL4.0ch01	2307483	2307683	38	SL4.0ch01:2307583	-5266	Solyc01g008220.3.1	TCP transcription factor 15 (AHRD V3.11 *** tr|G3BGV5|G3BGV5_SOLLC)
Replicates 1_2	SL4.0ch09	65942378	65942578	37.5	SL4.0ch09:65942478	-984	Solyc09g090330.3.1	Transducin/WD40 repeat-like superfamily protein (AHRD V3.3 *** AT4G14310.1)
Replicates 1_2	SL4.0ch04	2409232	2409432	40	SL4.0ch04:2409332	-3399	Solyc04g008720.4.1	Arginine/serine-rich-like splicing factor (AHRD V3.3 *-* Q9SII4_ARATH)
Replicates 1_2	SL4.0ch12	66436106	66436306	40	SL4.0ch12:66436206	-4571	Solyc12g099950.3.1	SNF1 kinase complex anchoring protein
Replicates 1_2	SL4.0ch04	61967660	61967860	24	SL4.0ch04:61967760	-13236	Solyc04g079590.3.1	Dof zinc finger protein (AHRD V3.3 *-* A0A2K3NXA1_TRIPR)
Replicates 1_2	SL4.0ch12	63789308	63789508	24	SL4.0ch12:63789408	-5022	Solyc12g089090.2.1	Outer envelope pore protein 24A
Replicates 1_2	SL4.0ch12	66201478	66201678	24	SL4.0ch12:66201578	-7	Solyc12g099560.2.1	Arginine methyltransferase (AHRD V3.3 *** A0A1Y1HZY4_KLENI)
Replicates 1_2	SL4.0ch01	4165066	4165266	29	SL4.0ch01:4165166	-45794	Solyc01g009770.3.1	GSH-induced LITAF domain protein (AHRD V3.3 *** GILP_ARATH)
Replicates 1_2	SL4.0ch01	64545652	64545852	29	SL4.0ch01:64545752	-28460	Solyc01g065530.3.1	leucine-rich repeat extensin-like protein 6 (AHRD V3.3 *-* XP_010321602.1)
Replicates 1_2	SL4.0ch02	22724760	22724960	29	SL4.0ch02:22724860	-1163	Solyc02g022860.1.1	FAD-binding Berberine family protein (AHRD V3.3 *** A0A2U1MQE5_ARTAN)
Replicates 1_2	SL4.0ch07	937405	937605	28.8	SL4.0ch07:937505	-169	Solyc07g006100.4.1	Oxysterol-binding protein-related protein 1D (AHRD V3.3 *** A0A2G3BX83_CAPCH)
Replicates 1_2	SL4.0ch01	81192361	81192561	28.8	SL4.0ch01:81192461	-197	Solyc01g098410.4.1	Lyk13 (AHRD V3.3 *** G3KGB4_SOLLC)
Replicates 1_2	SL4.0ch10	272451	272651	28.6	SL4.0ch10:272551	-28164	Solyc10g005480.3.1	Protein strawberry notch (AHRD V3.3 *** A0A2G3BCB2_CAPCH)
Replicates 1_2	SL4.0ch10	629261	629461	28.3	SL4.0ch10:629361	-7898	Solyc10g005980.1.1	Fasciclin-like arabinogalactan protein (AHRD V3.3 *** A0A2R6P548_ACTCH)
Replicates 1_2	SL4.0ch06	28857930	28858130	28	SL4.0ch06:28858030	-6806	Solyc06g048510.5.1	WD-40 repeat containing protein (AHRD V3.11 *** tr|A0A0K0XR03|A0A0K0XR03_TOBAC)
Replicates 1_2	SL4.0ch11	29707193	29707393	21	SL4.0ch11:29707293	-87543	Solyc11g045330.2.1	Paired amphipathic helix Sin3-like protein (AHRD V3.3 *-* A0A178WJA6_ARATH)
Replicates 1_2	SL4.0ch10	10549942	10550142	20.5	SL4.0ch10:10550042	-9009	Solyc10g018870.2.1	Unknown protein
Replicates 1_2	SL4.0ch00	2638543	2638743	49	SL4.0ch00:2638643	-58860	Solyc00g500158.1.1	Cytochrome b6-f complex subunit 4 (AHRD V3.3 *** A0A2G2XBM1_CAPBA)
Replicates 1_2	SL4.0ch02	35834964	35835164	31	SL4.0ch02:35835064	-20589	Solyc02g067660.4.1	Glycosyltransferase (AHRD V3.3 *** A0A2U1M9M1_ARTAN)
Replicates 1_2	SL4.0ch03	45985444	45985644	33	SL4.0ch03:45985544	-778	Solyc03g078780.3.1	UDP-glycosyltransferase 76C4-like (AHRD V3.3 *** A0A2I4EQP1_9ROSI)
Replicates 1_2	SL4.0ch08	56932158	56932358	33	SL4.0ch08:56932258	-5588	Solyc08g074670.3.1	F-box/kelch-repeat protein SKIP25 (AHRD V3.3 *** A0A2G2XM52_CAPBA)
Replicates 1_2	SL4.0ch12	54478979	54479179	25	SL4.0ch12:54479079	-67322	Solyc12g040710.1.1	Sucrose synthase (AHRD V3.3 *-* M1B219_SOLTU)
Replicates 1_2	SL4.0ch00	9354634	9354834	57	SL4.0ch00:9354734	-147369	Solyc00g500397.1.1	Unknown protein
Replicates 1_2	SL4.0ch09	2922646	2922846	35	SL4.0ch09:2922746	-3177	Solyc09g009430.3.1	Iron-sulfur assembly protein IscA-like 1
Replicates 1_2	SL4.0ch12	65687696	65687896	34.1	SL4.0ch12:65687796	-29808	Solyc12g098810.2.1	Unknown protein
Replicates 1_2	SL4.0ch02	43347922	43348122	34.1	SL4.0ch02:43348022	-3988	Solyc02g081370.2.1	AMP-dependent synthetase/ligase (AHRD V3.3 *** A0A200PYF6_9MAGN)
Replicates 1_2	SL4.0ch07	65543592	65543792	26	SL4.0ch07:65543692	-30	Solyc07g063140.1.1	Glutamyl-tRNA(Gln) amidotransferase subunit C
Replicates 1_2	SL4.0ch11	2967046	2967246	25.8	SL4.0ch11:2967146	-10989	Solyc11g008740.2.1	Pentatricopeptide repeat-containing protein (AHRD V3.3 *** A0A2G2VE96_CAPBA)
Replicates 1_2	SL4.0ch12	64845619	64845819	25.7	SL4.0ch12:64845719	-1556	Solyc12g096380.1.1	Peptidyl-tRNA hydrolase II (PTH2) family protein (AHRD V3.3 *-* Q9FT62_ARATH)
Replicates 1_2	SL4.0ch00	7887404	7887604	25.6	SL4.0ch00:7887504	-85430	Solyc00g500355.1.1	Polyadenylate-binding protein RBP47B (AHRD V3.11 *-* tr|A0A2G3BE08|A0A2G3BE08_CAPCH)
Replicates 1_2	SL4.0ch02	45972094	45972294	37	SL4.0ch02:45972194	-5008	Solyc02g084890.3.1	P-loop containing nucleoside triphosphate hydrolases superfamily protein (AHRD V3.3 *** A0A2U1NGS8_ARTAN)
Replicates 1_2	SL4.0ch00	8520074	8520274	111	SL4.0ch00:8520174	-49439	Solyc00g500367.1.1	Unknown protein
Replicates 1_2	SL4.0ch01	61158790	61158990	28	SL4.0ch01:61158890	-16289	Solyc01g058705.1.1	Calcium-binding EF-hand (AHRD V3.3 *** A0A2U1NQC6_ARTAN)
Replicates 1_2	SL4.0ch07	60322495	60322695	28	SL4.0ch07:60322595	-6252	Solyc07g051870.1.1	MAP kinase kinase kinase 52
Replicates 1_2	SL4.0ch12	64720691	64720891	28	SL4.0ch12:64720791	-3512	Solyc12g096170.2.1	embryo defective 3006 (AHRD V3.3 *** AT4G19350.1)
Replicates 1_2	SL4.0ch08	437872	438072	27.9	SL4.0ch08:437972	-13688	Solyc08g005580.3.1	Root UVB sensitive family (AHRD V3.11 *** tr|A0A2U1QLM3|A0A2U1QLM3_ARTAN)
Replicates 1_2	SL4.0ch11	263917	264117	27.7	SL4.0ch11:264017	-6432	Solyc11g005320.1.1	RING/U-box superfamily protein (AHRD V3.3 *** A0A2U1QK74_ARTAN)
Replicates 1_2	SL4.0ch07	66611123	66611323	27.5	SL4.0ch07:66611223	-2993	Solyc07g064800.3.1	Threonine--tRNA ligase
Replicates 1_2	SL4.0ch04	62253078	62253278	27.5	SL4.0ch04:62253178	-5295	Solyc04g079970.3.1	geranylgeranyl pyrophosphate synthase 2
Replicates 1_2	SL4.0ch07	894126	894326	23	SL4.0ch07:894226	-21742	Solyc07g006040.3.1	GDP-L-fucose synthase (AHRD V3.3 *** A0A1Y1HPT7_KLENI)
Replicates 1_2	SL4.0ch02	40673464	40673664	22.2	SL4.0ch02:40673564	-14512	Solyc02g077860.1.1	Ethylene-responsive transcription factor 4 (AHRD V3.3 *-* A0A2G3D5H4_CAPCH)
Replicates 1_2	SL4.0ch04	1297295	1297495	20	SL4.0ch04:1297395	-19092	Solyc04g007600.4.1	DUF4228 domain-containing protein (AHRD V3.3 *** A0A1Q3CT45_CEPFO)
Replicates 1_2	SL4.0ch01	80624580	80624780	30	SL4.0ch01:80624680	-5682	Solyc01g097580.1.1	Protein SUPPRESSOR OF K(+) TRANSPORT GROWTH DEFECT 1 (AHRD V3.3 *-* A0A2G2W7B7_CAPBA)
Replicates 1_2	SL4.0ch01	80883580	80883780	30	SL4.0ch01:80883680	-1256	Solyc01g097980.3.1	Deoxyuridine 5'-triphosphate nucleotidohydrolase (AHRD V3.11 *** tr|A0A2G2W7R1|A0A2G2W7R1_CAPBA)
Replicates 1_2	SL4.0ch07	59451433	59451633	30	SL4.0ch07:59451533	-7367	Solyc07g049250.1.1	RNA-binding protein (AHRD V3.11 *-* tr|Q941H8|Q941H8_SOLTU)
Replicates 1_2	SL4.0ch03	63064530	63064730	19.1	SL4.0ch03:63064630	-8058	Solyc03g120150.3.1	DUF632 domain-containing protein/DUF630 domain-containing protein (AHRD V3.3 *-* A0A1Q3CDM4_CEPFO)
Replicates 1_2	SL4.0ch01	84593761	84593961	32	SL4.0ch01:84593861	-7289	Solyc01g103770.3.1	Unknown protein
Replicates 1_2	SL4.0ch04	52905562	52905762	32	SL4.0ch04:52905662	-23682	Solyc04g055060.3.1	VQ motif-containing protein (AHRD V3.3 *-* Q9C8B9_ARATH)
Replicates 1_2	SL4.0ch08	60441721	60441921	31.1	SL4.0ch08:60441821	-12914	Solyc08g078550.1.1	O-fucosyltransferase (AHRD V3.3 *** A0A2P5AVU2_PARAD)
Replicates 1_2	SL4.0ch06	30527637	30527837	20.2	SL4.0ch06:30527737	-30244	Solyc06g050230.4.1	Adenine/guanine permease AZG1 (AHRD V3.3 *** A0A2G2WI90_CAPBA)
Replicates 1_2	SL4.0ch00	9250890	9251090	66.2	SL4.0ch00:9250990	-2927	Solyc00g500402.1.1	Unknown protein
Replicates 1_2	SL4.0ch09	67459074	67459274	34	SL4.0ch09:67459174	-883	Solyc09g092220.3.1	magnesium transporter NIPA (DUF803) (AHRD V3.3 *** AT4G13800.8)
Replicates 1_2	SL4.0ch05	65171444	65171644	33.9	SL4.0ch05:65171544	-11859	Solyc05g056490.4.1	S-adenosyl-L-methionine-dependent methyltransferases superfamily protein (AHRD V3.11 *** tr|A0A2U1MCW0|A0A2U1MCW0_ARTAN)
Replicates 1_2	SL4.0ch02	43933233	43933433	33.7	SL4.0ch02:43933333	-13577	Solyc02g082230.4.1	Thioredoxin reductase (AHRD V3.3 *** A0A2G3D6M1_CAPCH)
Replicates 1_2	SL4.0ch05	3631408	3631608	36	SL4.0ch05:3631508	-25218	Solyc05g009430.3.1	transmembrane protein (AHRD V3.3 *-* AT1G25400.2)
Replicates 1_2	SL4.0ch12	600487	600687	25	SL4.0ch12:600587	-3580	Solyc12g005950.2.1	Ethylene-responsive transcription factor 3 (AHRD V3.3 *-* A0A2U1KRH6_ARTAN)
Replicates 1_2	SL4.0ch04	62182340	62182540	24.9	SL4.0ch04:62182440	-20360	Solyc04g079860.1.1	Metalloendopeptidase / zinc ion binding protein (AHRD V3.3 *** F4K306_ARATH)
Replicates 1_2	SL4.0ch10	20691847	20692047	24.8	SL4.0ch10:20691947	-56146	Solyc10g150113.1.1	DUF1639 domain-containing protein (AHRD V3.3 *-* A0A1Q3BZV8_CEPFO)
Replicates 1_2	SL4.0ch00	6849157	6849357	66.1	SL4.0ch00:6849257	-13804	Solyc00g500290.2.1	Unknown protein
Replicates 1_2	SL4.0ch00	560576	560776	50	SL4.0ch00:560676	-28663	Solyc00g500013.1.1	Unknown protein
Replicates 1_2	SL4.0ch01	583049	583249	27	SL4.0ch01:583149	-3601	Solyc01g005850.3.1	Ubiquitin conjugating enzyme (AHRD V3.3 *** W7U085_9STRA)
Replicates 1_2	SL4.0ch08	60135965	60136165	27	SL4.0ch08:60136065	-7342	Solyc08g078200.2.1	Ethylene-responsive transcription factor 5 (AHRD V3.11 *** tr|A0A2G2XL45|A0A2G2XL45_CAPBA)
Replicates 1_2	SL4.0ch09	66285568	66285768	26.7	SL4.0ch09:66285668	-9123	Solyc09g090770.2.1	Major facilitator superfamily protein (AHRD V3.3 *** A0A2U1PVI2_ARTAN)
Replicates 1_2	SL4.0ch01	83735099	83735299	26.7	SL4.0ch01:83735199	-6136	Solyc01g102720.3.1	NAD(P)-binding Rossmann-fold superfamily protein (AHRD V3.3 *** Q9ZVQ2_ARATH)
Replicates 1_2	SL4.0ch07	65827587	65827787	26.3	SL4.0ch07:65827687	-712	Solyc07g063550.3.1	hypothetical protein (AHRD V3.3 *** AT2G20820.1)
Replicates 1_2	SL4.0ch05	62195565	62195765	26.2	SL4.0ch05:62195665	-6969	Solyc05g052600.4.1	Pkinase domain-containing protein (AHRD V3.3 *** A0A1Q3DF19_CEPFO)
Replicates 1_2	SL4.0ch12	3846166	3846366	26.1	SL4.0ch12:3846266	-8140	Solyc12g010920.2.1	F-box protein MAX2 (AHRD V3.3 *** A0A2G2X2R2_CAPBA)
Replicates 1_2	SL4.0ch09	4718871	4719071	26.1	SL4.0ch09:4718971	-18987	Solyc09g011370.3.1	protein MIZU-KUSSEI 1-like (AHRD V3.3 *** A0A2I4DSR5_9ROSI)
Replicates 1_2	SL4.0ch03	4470503	4470703	21.1	SL4.0ch03:4470603	-5496	Solyc03g032065.1.1	RING/U-box superfamily protein (AHRD V3.3 *** A0A2U1LI04_ARTAN)
Replicates 1_2	SL4.0ch04	55378736	55378936	21.1	SL4.0ch04:55378836	-2598	Solyc04g064870.3.1	MADS-box transcription factor 23 (AHRD V3.3 *** A0A2G2Y5S9_CAPAN)
Replicates 1_2	SL4.0ch00	1624589	1624789	65.7	SL4.0ch00:1624689	-35706	Solyc00g500088.2.1	Unknown protein
Replicates 1_2	SL4.0ch05	3104311	3104511	20.2	SL4.0ch05:3104411	-9806	Solyc05g008810.4.1	Octicosapeptide/Phox/Bem1p family protein (AHRD V3.3 *-* A0A2K3L5A6_TRIPR)
Replicates 1_2	SL4.0ch11	53307214	53307414	22	SL4.0ch11:53307314	-13760	Solyc11g071890.3.1	Serine/threonine-protein phosphatase (AHRD V3.3 *** A0A2G2VPQ2_CAPBA)
Replicates 1_2	SL4.0ch01	81060879	81061079	39	SL4.0ch01:81060979	-3497	Solyc01g098230.3.1	transmembrane protein adipocyte-associated 1-like (AHRD V3.3 *** A0A2I4GNC8_9ROSI)
Replicates 1_2	SL4.0ch07	2467453	2467653	29	SL4.0ch07:2467553	-47176	Solyc07g007860.1.1	BSD domain-containing protein (AHRD V3.11 *** tr|A0A1Q3D6V5|A0A1Q3D6V5_CEPFO)
Replicates 1_2	SL4.0ch08	56641111	56641311	29	SL4.0ch08:56641211	-12877	Solyc08g074420.3.1	Tryptophan--tRNA ligase
Replicates 1_2	SL4.0ch08	59811462	59811662	29	SL4.0ch08:59811562	-5310	Solyc08g077800.5.1	Peptidyl-prolyl cis-trans isomerase (AHRD V3.3 *** A0A2U1QI01_ARTAN)
Replicates 1_2	SL4.0ch11	3444637	3444837	29	SL4.0ch11:3444737	-8087	Solyc11g010350.2.1	bHLH transcription factor 069
Replicates 1_2	SL4.0ch11	51469262	51469462	19	SL4.0ch11:51469362	-9977	Solyc11g068790.2.1	Polynucleotidyl transferase
Replicates 1_2	SL4.0ch04	6948650	6948850	37	SL4.0ch04:6948750	-15954	Solyc04g016150.2.1	F-box/LRR-repeat protein At5g63520-like (AHRD V3.3 *** A0A2I4FAV8_9ROSI)
Replicates 1_2	SL4.0ch02	40556044	40556244	31	SL4.0ch02:40556144	-4190	Solyc02g077670.3.1	Alpha-1
Replicates 1_2	SL4.0ch05	63977840	63978040	31	SL4.0ch05:63977940	-11509	Solyc05g054750.3.1	Sulfate transporter (AHRD V3.3 *** Q93YK5_BRANA)
Replicates 1_2	SL4.0ch07	2075879	2076079	30.7	SL4.0ch07:2075979	-2710	Solyc07g007370.3.1	Ubiquitin-associated (UBA)/TS-N domain-containing protein (AHRD V3.3 *** A0A2U1MD44_ARTAN)
Replicates 1_2	SL4.0ch11	2608413	2608613	35	SL4.0ch11:2608513	-2	Solyc11g008360.3.1	Pseudouridine synthase family protein (AHRD V3.3 *** A0A1P8AXV3_ARATH)
Replicates 1_2	SL4.0ch12	61597765	61597965	33	SL4.0ch12:61597865	-45615	Solyc12g056080.2.1	endochitinase A-like (AHRD V3.3 *** XP_010314523.1)
Replicates 1_2	SL4.0ch05	5878793	5878993	32.8	SL4.0ch05:5878893	-2302	Solyc05g012580.1.1	protein qua-1 isoform X1 (AHRD V3.3 *** XP_010321178.1)
Replicates 1_2	SL4.0ch00	8474041	8474241	32.7	SL4.0ch00:8474141	-2259	Solyc00g500368.1.1	Unknown protein
Replicates 1_2	SL4.0ch00	536331	536531	43.7	SL4.0ch00:536431	-8263	Solyc00g500010.1.1	Unknown protein
Replicates 1_2	SL4.0ch12	64900837	64901037	24	SL4.0ch12:64900937	-1444	Solyc12g096470.2.1	Protein GLUTAMINE DUMPER 4 (AHRD V3.3 *** A0A2G3B4X7_CAPCH)
Replicates 1_2	SL4.0ch04	55378179	55378379	23.8	SL4.0ch04:55378279	-3155	Solyc04g064870.3.1	MADS-box transcription factor 23 (AHRD V3.3 *** A0A2G2Y5S9_CAPAN)
Replicates 1_2	SL4.0ch02	41026466	41026666	23.8	SL4.0ch02:41026566	-6655	Solyc02g078285.1.1	DNA ligase-like protein (AHRD V3.3 *** AT2G33793.2)
Replicates 1_2	SL4.0ch09	3146802	3147002	19	SL4.0ch09:3146902	-9135	Solyc09g009710.5.1	Cytochrome P450 (AHRD V3.3 *** A0A200Q6A4_9MAGN)
Replicates 1_2	SL4.0ch09	66285844	66286044	18.6	SL4.0ch09:66285944	-8847	Solyc09g090770.2.1	Major facilitator superfamily protein (AHRD V3.3 *** A0A2U1PVI2_ARTAN)
Replicates 1_2	SL4.0ch12	1811592	1811792	18.5	SL4.0ch12:1811692	-23375	Solyc12g008330.3.1	dehydration responsive element binding protein 2
Replicates 1_2	SL4.0ch02	49420525	49420725	26	SL4.0ch02:49420625	-6749	Solyc02g150147.1.1	proline dehydrogenase
Replicates 1_2	SL4.0ch08	57508361	57508561	26	SL4.0ch08:57508461	-6793	Solyc08g075310.4.1	Protein decapping 5 (AHRD V3.3 *-* A0A2G3B6L4_CAPCH)
Replicates 1_2	SL4.0ch10	272616	272816	25.4	SL4.0ch10:272716	-28329	Solyc10g005480.3.1	Protein strawberry notch (AHRD V3.3 *** A0A2G3BCB2_CAPCH)
Replicates 1_2	SL4.0ch04	58859682	58859882	25.1	SL4.0ch04:58859782	-9700	Solyc04g075010.1.1	Serine/threonine-protein kinase-like protein (AHRD V3.3 *** A0A2G3CNY7_CAPCH)
Replicates 1_2	SL4.0ch08	63818055	63818255	37	SL4.0ch08:63818155	-4526	Solyc08g083120.3.1	Methionine gamma-lyase (AHRD V3.3 *** A0A1U8G8Y5_CAPAN)
Replicates 1_2	SL4.0ch00	1628471	1628671	83	SL4.0ch00:1628571	-39588	Solyc00g500088.2.1	Unknown protein
Replicates 1_2	SL4.0ch08	9535387	9535587	44.5	SL4.0ch08:9535487	-34217	Solyc08g150111.1.1	Unknown protein
Replicates 1_2	SL4.0ch02	48780539	48780739	21	SL4.0ch02:48780639	-4287	Solyc02g088750.2.1	50S ribosomal protein L7/L12 (AHRD V3.3 *** A0A1U8GY39_CAPAN)
Replicates 1_2	SL4.0ch04	5027914	5028114	21	SL4.0ch04:5028014	-754	Solyc04g014740.3.1	Fumarylacetoacetase (AHRD V3.3 *** A0A1U8GL68_CAPAN)
Replicates 1_2	SL4.0ch05	2169012	2169212	21	SL4.0ch05:2169112	-9820	Solyc05g007600.1.1	Zinc-finger homeodomain protein 11 (AHRD V3.3 *** A0A2G2VLP7_CAPBA)
Replicates 1_2	SL4.0ch04	57460985	57461185	28	SL4.0ch04:57461085	-2980	Solyc04g072530.2.1	Mitochondrial transcription termination factor family protein (AHRD V3.3 *** Q9SD94_ARATH)
Replicates 1_2	SL4.0ch06	31911836	31912036	28	SL4.0ch06:31911936	-287	Solyc06g051040.5.1	Mitotic checkpoint serine/threonine-protein kinase BUB1-like protein (AHRD V3.11 *-* tr|A0A2K3L1J0|A0A2K3L1J0_TRIPR)
Replicates 1_2	SL4.0ch06	40416807	40417007	28	SL4.0ch06:40416907	-25070	Solyc06g068990.4.1	Calcium-binding allergen Ole e 8 (AHRD V3.3 *** A0A2G2WLM3_CAPBA)
Replicates 1_2	SL4.0ch07	10869949	10870149	28	SL4.0ch07:10870049	-120646	Solyc07g018433.1.1	Unknown protein
Replicates 1_2	SL4.0ch07	65558647	65558847	28	SL4.0ch07:65558747	-3883	Solyc07g063190.4.1	Unknown protein
Replicates 1_2	SL4.0ch01	74193022	74193222	34	SL4.0ch01:74193122	-11253	Solyc01g087005.1.1	Unknown protein
Replicates 1_2	SL4.0ch01	75900587	75900787	34	SL4.0ch01:75900687	-13713	Solyc01g089940.1.1	F-box domain (AHRD V3.3 *-* A0A200QFG4_9MAGN)
Replicates 1_2	SL4.0ch01	86336379	86336579	30	SL4.0ch01:86336479	-7572	Solyc01g106040.3.1	GATA transcription factor 28 (AHRD V3.3 *** A0A2G3AWS2_CAPCH)
Replicates 1_2	SL4.0ch01	78124378	78124578	32	SL4.0ch01:78124478	-15018	Solyc01g094330.3.1	RNA helicase DEAD4
Replicates 1_2	SL4.0ch03	49479141	49479341	32	SL4.0ch03:49479241	-16675	Solyc03g093540.1.1	Ethylene-responsive transcription factor 5 (AHRD V3.3 *** A0A2G3CVP7_CAPCH)
Replicates 1_2	SL4.0ch09	2321651	2321851	32	SL4.0ch09:2321751	-12791	Solyc09g098620.2.1	leucine-rich repeat receptor-like protein kinase PXC1 (AHRD V3.11 *** tr|A0A1S4B9J1|A0A1S4B9J1_TOBAC)
Replicates 1_2	SL4.0ch07	2536996	2537196	31.4	SL4.0ch07:2537096	-10390	Solyc07g007880.1.1	CCR4-NOT transcription complex subunit 10-like (AHRD V3.3 *** A0A2I4EMI0_9ROSI)
Replicates 1_2	SL4.0ch11	982946	983146	22.1	SL4.0ch11:983046	-2375	Solyc11g006200.2.1	AT-hook motif nuclear-localized protein 1 (AHRD V3.3 *** A0A2G2Y739_CAPAN)
Replicates 1_2	SL4.0ch05	2577280	2577480	22	SL4.0ch05:2577380	-5597	Solyc05g008130.4.1	hydroxyproline-rich glycoprotein family protein (AHRD V3.3 --* AT1G23040.3)
Replicates 1_2	SL4.0ch04	62161769	62161969	23	SL4.0ch04:62161869	-9233	Solyc04g079870.2.1	Hexosyltransferase (AHRD V3.3 *** A0A2G2ZRY0_CAPAN)
Replicates 1_2	SL4.0ch06	44343491	44343691	23	SL4.0ch06:44343591	-9245	Solyc06g075200.1.1	Fasciclin-like arabinogalactan protein 11 (AHRD V3.3 *** A0A2G2V1G2_CAPBA)
Replicates 1_2	SL4.0ch08	59087849	59088049	23	SL4.0ch08:59087949	-5060	Solyc08g077040.3.1	AT-hook motif nuclear-localized protein 10 (AHRD V3.11 *** tr|A0A2G3DCF2|A0A2G3DCF2_CAPCH)
Replicates 1_2	SL4.0ch03	62913492	62913692	22.3	SL4.0ch03:62913592	-2585	Solyc03g119940.3.1	Molybdate transporter like (AHRD V3.3 *** A0A2R6PTH4_ACTCH)
Replicates 1_2	SL4.0ch08	5464347	5464547	21	SL4.0ch08:5464447	-14033	Solyc08g015755.2.1	F-box family protein (AHRD V3.3 *** I0J3G4_ARAHH)
Replicates 1_2	SL4.0ch01	84572073	84572273	25	SL4.0ch01:84572173	-2532	Solyc01g103750.5.1	ATP phosphoribosyltransferase (AHRD V3.11 *** tr|A0A2K3PQR2|A0A2K3PQR2_TRIPR)
Replicates 1_2	SL4.0ch03	52113435	52113635	25	SL4.0ch03:52113535	-5232	Solyc03g095870.3.1	Peptide-N4-(N-acetyl-beta-glucosaminyl)asparagine amidase A (AHRD V3.3 *** A0A200PX65_9MAGN)
Replicates 1_2	SL4.0ch03	58100605	58100805	25	SL4.0ch03:58100705	-631	Solyc03g113590.3.1	5-formyltetrahydrofolate cycloligase
Replicates 1_2	SL4.0ch06	47060674	47060874	24.9	SL4.0ch06:47060774	-966	Solyc06g084325.1.1	EID1-like F-box protein 3 (AHRD V3.3 *** A0A2G2ZF18_CAPAN)
Replicates 1_2	SL4.0ch06	37514766	37514966	24.7	SL4.0ch06:37514866	-6954	Solyc06g063120.4.1	RING/U-box superfamily protein (AHRD V3.3 *** A0A2U1LDD8_ARTAN)
Replicates 1_2	SL4.0ch07	65875705	65875905	24.4	SL4.0ch07:65875805	-1934	Solyc07g063610.5.1	Membrane lipoprotein lipid attachment site-like protein
Replicates 1_2	SL4.0ch06	43007596	43007796	24.3	SL4.0ch06:43007696	-22246	Solyc06g073520.3.1	La-related protein 1 (AHRD V3.3 *** A0A2G3CAE9_CAPCH)
Replicates 1_2	SL4.0ch04	63687429	63687629	21	SL4.0ch04:63687529	-5132	Solyc04g081830.1.1	la-related protein 1C-like (AHRD V3.3 *** A0A2I4H6L2_9ROSI)
Replicates 1_2	SL4.0ch10	63165363	63165563	32.9	SL4.0ch10:63165463	-1545	Solyc10g084500.1.1	hypothetical protein (AHRD V3.3 *** AT5G02640.1)
Replicates 1_2	SL4.0ch09	62771173	62771373	27	SL4.0ch09:62771273	-4935	Solyc09g074750.3.1	Cation efflux family protein (AHRD V3.3 *-* A0A2U1NZ88_ARTAN)
Replicates 1_2	SL4.0ch12	63339209	63339409	27	SL4.0ch12:63339309	-6201	Solyc12g088370.2.1	RING-type E3 ubiquitin transferase (AHRD V3.3 *-* A0A2I4H694_9ROSI)
Replicates 1_2	SL4.0ch05	60572323	60572523	26.2	SL4.0ch05:60572423	-8082	Solyc05g050980.3.1	Transketolase (AHRD V3.11 *** tr|A0A200R9X0|A0A200R9X0_9MAGN)
Replicates 1_2	SL4.0ch08	2961410	2961610	26.2	SL4.0ch08:2961510	-5079	Solyc08g008590.4.1	Methionine gamma-lyase (AHRD V3.3 *** A0A1U8G8Y5_CAPAN)
Replicates 1_2	SL4.0ch08	437731	437931	26.1	SL4.0ch08:437831	-13829	Solyc08g005580.3.1	Root UVB sensitive family (AHRD V3.11 *** tr|A0A2U1QLM3|A0A2U1QLM3_ARTAN)
Replicates 1_2	SL4.0ch10	32273020	32273220	23.5	SL4.0ch10:32273120	-86335	Solyc10g045420.3.1	histone acetyltransferase GCN5 (AHRD V3.3 *** A0A2I4GKZ2_9ROSI)
Replicates 1_2	SL4.0ch11	48976336	48976536	30.4	SL4.0ch11:48976436	-12858	Solyc11g065480.3.1	protein RETICULATA-RELATED 4
Replicates 1_2	SL4.0ch02	31871157	31871357	20	SL4.0ch02:31871257	-2123	Solyc02g062290.2.1	RNA binding protein (AHRD V3.3 *-* A0A2K3MUE2_TRIPR)
Replicates 1_2	SL4.0ch03	60432193	60432393	20	SL4.0ch03:60432293	-5017	Solyc03g116670.4.1	transmembrane protein (AHRD V3.3 --* AT3G15780.1)
Replicates 1_2	SL4.0ch11	47458174	47458374	20	SL4.0ch11:47458274	-25020	Solyc11g062430.2.1	L-ascorbate oxidase (AHRD V3.3 *** ASO_TOBAC)
Replicates 1_2	SL4.0ch01	77517904	77518104	19.8	SL4.0ch01:77518004	-17795	Solyc01g091660.3.1	S-adenosyl-L-methionine-dependent methyltransferases superfamily protein (AHRD V3.3 *** A0A2U1NM08_ARTAN)
Replicates 1_2	SL4.0ch02	41242857	41243057	22	SL4.0ch02:41242957	-1527	Solyc02g078600.3.1	Splicing factor 3B subunit 2 (AHRD V3.3 *** A0A2G2XEY6_CAPBA)
Replicates 1_2	SL4.0ch08	7054061	7054261	22	SL4.0ch08:7054161	-11684	Solyc08g016220.1.1	Receptor like protein (AHRD V3.3 *** A0A1S8AD65_CITLI)
Replicates 1_2	SL4.0ch09	18300319	18300519	22	SL4.0ch09:18300419	-86326	Solyc09g020000.3.1	DUF3755 domain-containing protein (AHRD V3.3 *** A0A1Q3BKP1_CEPFO)
Replicates 1_2	SL4.0ch08	60105975	60106175	21.3	SL4.0ch08:60106075	-11873	Solyc08g078160.3.1	Ethylene-responsive transcription factor 2 (AHRD V3.3 *** A0A2G3DC56_CAPCH)
Replicates 1_2	SL4.0ch12	2519243	2519443	21.1	SL4.0ch12:2519343	-8351	Solyc12g009170.2.1	Inter-alpha-trypsin inhibitor heavy chain-like protein (AHRD V3.3 *** Q8L798_ARATH)
Replicates 1_2	SL4.0ch07	66608880	66609080	18	SL4.0ch07:66608980	-1155	Solyc07g064790.4.1	glycine-rich cell wall structural protein 1-like (AHRD V3.3 *-* XP_019070308.1)
Replicates 1_2	SL4.0ch10	513450	513650	21	SL4.0ch10:513550	-2320	Solyc10g005790.3.1	ER membrane protein complex subunit 8/9-like protein (AHRD V3.11 *** tr|A0A1U8HGZ8|A0A1U8HGZ8_CAPAN)
Replicates 1_2	SL4.0ch09	5117926	5118126	34	SL4.0ch09:5118026	-9536	Solyc09g011770.3.1	R2R3MYB transcription factor 1
Replicates 1_2	SL4.0ch10	1092463	1092663	18	SL4.0ch10:1092563	-11863	Solyc10g006770.4.1	Zinc finger protein CONSTANS-LIKE 10 (AHRD V3.11 *** tr|A0A2G2V382|A0A2G2V382_CAPBA)
Replicates 1_2	SL4.0ch00	535907	536107	53.3	SL4.0ch00:536007	-8687	Solyc00g500010.1.1	Unknown protein
Replicates 1_2	SL4.0ch01	82829870	82830070	24	SL4.0ch01:82829970	-3056	Solyc01g100570.4.1	Pentatricopeptide repeat (AHRD V3.3 *** A0A200R237_9MAGN)
Replicates 1_2	SL4.0ch04	6646501	6646701	24	SL4.0ch04:6646601	-13079	Solyc04g150112.2.1	Thioredoxin reductase (AHRD V3.11 *** tr|A0A2G3BH62|A0A2G3BH62_CAPCH)
Replicates 1_2	SL4.0ch05	64921171	64921371	24	SL4.0ch05:64921271	-6815	Solyc05g056130.4.1	Zinc finger (C3HC4-type RING finger) family protein (AHRD V3.3 *** A0A2U1N0U6_ARTAN)
Replicates 1_2	SL4.0ch06	1668167	1668367	24	SL4.0ch06:1668267	-8276	Solyc06g007650.2.1	FRIGIDA-like protein (AHRD V3.3 *** A0A2G3C4G8_CAPCH)
Replicates 1_2	SL4.0ch06	41328576	41328776	24	SL4.0ch06:41328676	-3767	Solyc06g071090.3.1	NAD(P)-binding Rossmann-fold superfamily protein (AHRD V3.3 *** A0A2U1L921_ARTAN)
Replicates 1_2	SL4.0ch11	3229880	3230080	24	SL4.0ch11:3229980	-3827	Solyc11g009070.2.1	DAHP synthase 1 precursor
Replicates 1_2	SL4.0ch00	459949	460149	78	SL4.0ch00:460049	-18340	Solyc00g500005.1.1	Unknown protein
Replicates 1_2	SL4.0ch08	58244154	58244354	30	SL4.0ch08:58244254	-17614	Solyc08g076120.3.1	Xyloglucan endotransglucosylase/hydrolase (AHRD V3.3 *** A0A2G3DCR6_CAPCH)
Replicates 1_2	SL4.0ch11	6177341	6177541	30	SL4.0ch11:6177441	-26271	Solyc11g013220.2.1	Oxysterol-binding protein (AHRD V3.3 *** A0A200QNE7_9MAGN)
Replicates 1_2	SL4.0ch06	28858086	28858286	30	SL4.0ch06:28858186	-6650	Solyc06g048510.5.1	WD-40 repeat containing protein (AHRD V3.11 *** tr|A0A0K0XR03|A0A0K0XR03_TOBAC)
Replicates 1_2	SL4.0ch11	51531263	51531463	26	SL4.0ch11:51531363	-2409	Solyc11g068893.1.1	Late embryogenesis abundant hydroxyproline-rich glycoprotein (AHRD V3.3 *-* A0A2K3L117_TRIPR)
Replicates 1_2	SL4.0ch00	7882654	7882854	49	SL4.0ch00:7882754	-90180	Solyc00g500355.1.1	Polyadenylate-binding protein RBP47B (AHRD V3.11 *-* tr|A0A2G3BE08|A0A2G3BE08_CAPCH)
Replicates 1_2	SL4.0ch07	60298383	60298583	28	SL4.0ch07:60298483	-3631	Solyc07g051850.3.1	Unknown protein
Replicates 1_2	SL4.0ch08	9950261	9950461	18	SL4.0ch08:9950361	-15299	Solyc08g150120.1.1	Unknown protein
Replicates 1_2	SL4.0ch07	13582958	13583158	31.6	SL4.0ch07:13583058	-18119	Solyc07g020790.4.1	Unknown protein
Replicates 1_2	SL4.0ch00	9189929	9190129	91.5	SL4.0ch00:9190029	-8772	Solyc00g500396.1.1	Unknown protein
Replicates 1_2	SL4.0ch04	4013696	4013896	20.1	SL4.0ch04:4013796	-1935	Solyc04g011550.2.1	pheromone-processing carboxypeptidase KEX1-like (AHRD V3.3 --* XP_022740211.1)
Replicates 1_2	SL4.0ch09	68267484	68267684	20	SL4.0ch09:68267584	-2227	Solyc09g098380.3.1	Fanconi-associated nuclease (AHRD V3.11 *** tr|A0A328DUX8|A0A328DUX8_9ASTE)
Replicates 1_2	SL4.0ch01	5869367	5869567	19	SL4.0ch01:5869467	-3226	Solyc01g010770.4.1	Protein kinase superfamily protein (AHRD V3.3 *** A0A2U1NYF7_ARTAN)
Replicates 1_2	SL4.0ch08	58319660	58319860	19	SL4.0ch08:58319760	-3379	Solyc08g076180.3.1	protein dimerization (AHRD V3.3 *-* AT5G45610.1)
Replicates 1_2	SL4.0ch12	66153943	66154143	19	SL4.0ch12:66154043	-9258	Solyc12g099470.2.1	7-dehydrocholesterol reductase-like protein (AHRD V3.3 *-* AT1G16810.3)
Replicates 1_2	SL4.0ch02	43843208	43843408	19	SL4.0ch02:43843308	-5797	Solyc02g082140.3.1	Surfeit locus protein 6 (AHRD V3.3 *** A0A2U1QM59_ARTAN)
Replicates 1_2	SL4.0ch09	66261482	66261682	18.8	SL4.0ch09:66261582	-8650	Solyc09g090720.3.1	AMT1
Replicates 1_2	SL4.0ch00	7744310	7744510	18.6	SL4.0ch00:7744410	-41923	Solyc00g032030.2.1	E3 ubiquitin-protein ligase (AHRD V3.11 *** tr|A0A2G2WYW6|A0A2G2WYW6_CAPBA)
Replicates 1_2	SL4.0ch05	3087652	3087852	36.2	SL4.0ch05:3087752	-11184	Solyc05g008820.4.1	lipid phosphate phosphatase 2-like (AHRD V3.3 *** A0A1S4AJT8_TOBAC)
Replicates 1_2	SL4.0ch06	45303549	45303749	21	SL4.0ch06:45303649	-2521	Solyc06g076680.5.1	UPF0503 protein
Replicates 1_2	SL4.0ch01	1368462	1368662	19.3	SL4.0ch01:1368562	-663	Solyc01g006780.4.1	Unknown protein
Replicates 1_2	SL4.0ch03	2604937	2605137	20	SL4.0ch03:2605037	-12859	Solyc03g025160.4.1	Unknown protein
Replicates 1_2	SL4.0ch02	47069849	47070049	22	SL4.0ch02:47069949	-3580	Solyc02g086400.3.1	CTP synthase (AHRD V3.3 *-* A0A328EA92_9ASTE)
Replicates 1_2	SL4.0ch00	3246930	3247130	32.6	SL4.0ch00:3247030	-88430	Solyc00g500174.1.1	Unknown protein
Replicates 1_2	SL4.0ch01	1863337	1863537	21	SL4.0ch01:1863437	-4355	Solyc01g007760.3.1	Mitochondrial transcription termination factor family protein (AHRD V3.3 *** O64685_ARATH)
Replicates 1_2	SL4.0ch02	47677442	47677642	21	SL4.0ch02:47677542	-9278	Solyc02g087210.3.1	Peroxidase (AHRD V3.3 *** K4BBM6_SOLLC)
Replicates 1_2	SL4.0ch03	50724017	50724217	21	SL4.0ch03:50724117	-15792	Solyc03g095200.1.1	Superoxide dismutase (AHRD V3.3 *** S8E1B9_9LAMI)
Replicates 1_2	SL4.0ch03	63807770	63807970	21	SL4.0ch03:63807870	-6167	Solyc03g121180.4.1	Unknown protein
Replicates 1_2	SL4.0ch11	48226950	48227150	21	SL4.0ch11:48227050	-48023	Solyc11g064920.2.1	hypoxia-induced protein L31
Replicates 1_2	SL4.0ch08	61622871	61623071	21	SL4.0ch08:61622971	-7753	Solyc08g080180.1.1	SPX domain-containing protein (AHRD V3.3 *** D7MDY2_ARALL)
Replicates 1_2	SL4.0ch08	60441969	60442169	20.9	SL4.0ch08:60442069	-12666	Solyc08g078550.1.1	O-fucosyltransferase (AHRD V3.3 *** A0A2P5AVU2_PARAD)
Replicates 1_2	SL4.0ch00	7744104	7744304	20.9	SL4.0ch00:7744204	-42129	Solyc00g032030.2.1	E3 ubiquitin-protein ligase (AHRD V3.11 *** tr|A0A2G2WYW6|A0A2G2WYW6_CAPBA)
Replicates 1_2	SL4.0ch04	59237366	59237566	20.3	SL4.0ch04:59237466	-1302	Solyc04g076330.3.1	Argininosuccinate lyase (AHRD V3.11 *** tr|A0A2G3CP16|A0A2G3CP16_CAPCH)
Replicates 1_2	SL4.0ch02	37130324	37130524	20.1	SL4.0ch02:37130424	-20755	Solyc02g069180.4.1	Transcription initiation factor TFIID subunit 8 (AHRD V3.3 *** A0A1J3F703_NOCCA)
Replicates 1_2	SL4.0ch02	51520506	51520706	31	SL4.0ch02:51520606	-6261	Solyc02g092430.1.1	Phototropic-responsive NPH3 family protein (AHRD V3.3 *-* A0A2U1NGE5_ARTAN)
Replicates 1_2	SL4.0ch03	3699379	3699579	31	SL4.0ch03:3699479	-2870	Solyc03g026280.3.1	CRT binding factor 3 (AHRD V3.3 *** B3TPP7_SOLPI)
Replicates 1_2	SL4.0ch08	58599992	58600192	31	SL4.0ch08:58600092	-19237	Solyc08g076520.3.1	Plastid lipid-associated protein chloroplastic-like (AHRD V3.3 *** A0A2K3PR63_TRIPR)
Replicates 1_2	SL4.0ch01	75486225	75486425	23	SL4.0ch01:75486325	-11252	Solyc01g088450.2.1	RING/U-box superfamily protein (AHRD V3.3 *-* A0A2U1LDD8_ARTAN)
Replicates 1_2	SL4.0ch06	37548217	37548417	23	SL4.0ch06:37548317	-1629	Solyc06g063170.3.1	Unknown protein
Replicates 1_2	SL4.0ch11	53909711	53909911	23	SL4.0ch11:53909811	-6310	Solyc11g072623.1.1	Unknown protein
Replicates 1_2	SL4.0ch12	1542159	1542359	23	SL4.0ch12:1542259	-10810	Solyc12g007080.2.1	thermosome subunit gamma (AHRD V3.3 *** AT5G19540.2)
Replicates 1_2	SL4.0ch01	87098873	87099073	22.5	SL4.0ch01:87098973	-16412	Solyc01g107180.3.1	Zinc finger protein (AHRD V3.3 *** A0T3Q5_SOLTU)
Replicates 1_2	SL4.0ch10	62049700	62049900	22.2	SL4.0ch10:62049800	-3468	Solyc10g082040.2.1	ovate family protein 21
Replicates 1_2	SL4.0ch01	87867694	87867894	27	SL4.0ch01:87867794	-3754	Solyc01g108190.3.1	Protein disulfide-isomerase SCO2 (AHRD V3.3 *** A0A2G3AT86_CAPCH)
Replicates 1_2	SL4.0ch03	61926721	61926921	27	SL4.0ch03:61926821	-5405	Solyc03g118620.3.1	transmembrane protein (AHRD V3.3 *** AT3G17950.1)
Replicates 1_2	SL4.0ch04	57804517	57804717	27	SL4.0ch04:57804617	-4785	Solyc04g072900.1.1	dehydration-responsive element binding protein 3
Replicates 1_2	SL4.0ch06	45479665	45479865	25	SL4.0ch06:45479765	-4	Solyc06g076930.2.1	ABC transporter-like (AHRD V3.3 *** A0A200PWT6_9MAGN)
Replicates 1_2	SL4.0ch07	407611	407811	36	SL4.0ch07:407711	-12043	Solyc07g005520.1.1	Ubiquitin carboxyl-terminal hydrolase 23 (AHRD V3.3 *** A0A1U8HH33_CAPAN)
Replicates 1_2	SL4.0ch04	38758856	38759056	18	SL4.0ch04:38758956	-177934	Solyc04g049120.4.1	Tetraspanin (AHRD V3.3 *** A0A2U1M9G9_ARTAN)
Replicates 1_2	SL4.0ch00	591884	592084	36	SL4.0ch00:591984	-36136	Solyc00g500014.1.1	Unknown protein
Replicates 1_2	SL4.0ch03	62940289	62940489	32	SL4.0ch03:62940389	-660	Solyc03g119980.3.1	Alpha/beta-Hydrolases superfamily protein (AHRD V3.3 *** O04083_ARATH)
Replicates 1_2	SL4.0ch00	6818047	6818247	69	SL4.0ch00:6818147	-44914	Solyc00g500290.2.1	Unknown protein
Replicates 1_2	SL4.0ch00	2640226	2640426	36.4	SL4.0ch00:2640326	-60543	Solyc00g500158.1.1	Cytochrome b6-f complex subunit 4 (AHRD V3.3 *** A0A2G2XBM1_CAPBA)
Replicates 1_2	SL4.0ch03	46857247	46857447	30	SL4.0ch03:46857347	-1508	Solyc03g082340.1.1	Avr9/Cf-9 rapidly elicited protein 65 (AHRD V3.3 *** Q9FQZ0_TOBAC)
Replicates 1_2	SL4.0ch11	11898404	11898604	29.1	SL4.0ch11:11898504	-10666	Solyc11g020660.1.1	TCP transcription factor 12
Replicates 1_2	SL4.0ch01	83276968	83277168	20	SL4.0ch01:83277068	-17345	Solyc01g101180.5.1	hypothetical protein (AHRD V3.3 *-* AT1G09520.1)
Replicates 1_2	SL4.0ch11	5085570	5085770	20	SL4.0ch11:5085670	-5040	Solyc11g012090.2.1	Phosphoribosylglycinamide formyltransferase (AHRD V3.3 *** A0A2U1PTP7_ARTAN)
Replicates 1_2	SL4.0ch02	42778256	42778456	19.6	SL4.0ch02:42778356	-3178	Solyc02g080600.1.1	Ankyrin repeat (AHRD V3.11 *** tr|A0A200PYZ7|A0A200PYZ7_9MAGN)
Replicates 1_2	SL4.0ch07	65875604	65875804	19.6	SL4.0ch07:65875704	-1833	Solyc07g063610.5.1	Membrane lipoprotein lipid attachment site-like protein
Replicates 1_2	SL4.0ch08	9500988	9501188	114	SL4.0ch08:9501088	-896	Solyc08g016794.1.1	Unknown protein
Replicates 1_2	SL4.0ch08	9428647	9428847	73	SL4.0ch08:9428747	-16056	Solyc08g150109.1.1	Unknown protein
Replicates 1_2	SL4.0ch01	74969127	74969327	28	SL4.0ch01:74969227	-27345	Solyc01g087880.3.1	Unknown protein
Replicates 1_2	SL4.0ch02	44027898	44028098	28	SL4.0ch02:44027998	-15748	Solyc02g082350.3.1	Unknown protein
Replicates 1_2	SL4.0ch05	63969460	63969660	28	SL4.0ch05:63969560	-8290	Solyc05g054740.3.1	Metal tolerance protein 11 (AHRD V3.3 *** A0A2G2WUE3_CAPBA)
Replicates 1_2	SL4.0ch00	639004	639204	63	SL4.0ch00:639104	-62442	Solyc00g500015.1.1	Unknown protein
Replicates 1_2	SL4.0ch02	44957282	44957482	22	SL4.0ch02:44957382	-4337	Solyc02g083620.3.1	Ras domain-containing protein/DUF632 domain-containing protein/DUF630 domain-containing protein (AHRD V3.11 *** tr|A0A1Q3BAN2|A0A1Q3BAN2_CEPFO)
Replicates 1_2	SL4.0ch03	62923212	62923412	22	SL4.0ch03:62923312	-2	Solyc03g119950.1.1	Pentatricopeptide repeat-containing protein
Replicates 1_2	SL4.0ch08	57740596	57740796	22	SL4.0ch08:57740696	-60775	Solyc08g075430.3.1	9-cis-epoxycarotenoid dioxygenase (AHRD V3.3 *** A0A193PR95_9LILI)
Replicates 1_2	SL4.0ch09	3341215	3341415	22	SL4.0ch09:3341315	-10937	Solyc09g009810.1.1	Thioredoxin family protein (AHRD V3.11 *** tr|Q940I2|Q940I2_ARATH)
Replicates 1_2	SL4.0ch11	50075332	50075532	22	SL4.0ch11:50075432	-9610	Solyc11g066325.1.1	Exostosin family protein (AHRD V3.3 *** A0A2U1P7C1_ARTAN)
Replicates 1_2	SL4.0ch04	3294083	3294283	22	SL4.0ch04:3294183	-14850	Solyc04g009920.3.1	cell division cycle 5
Replicates 1_2	SL4.0ch09	66286005	66286205	21.7	SL4.0ch09:66286105	-8686	Solyc09g090770.2.1	Major facilitator superfamily protein (AHRD V3.3 *** A0A2U1PVI2_ARTAN)
Replicates 1_2	SL4.0ch02	50309211	50309411	26	SL4.0ch02:50309311	-480	Solyc02g090760.4.1	hypothetical protein (AHRD V3.3 *-* AT3G50370.2)
Replicates 1_2	SL4.0ch05	4270124	4270324	26	SL4.0ch05:4270224	-8205	Solyc05g010010.1.1	Nudix hydrolase 1 (AHRD V3.3 *** A0A2G3B6G9_CAPCH)
Replicates 1_2	SL4.0ch09	1950033	1950233	26	SL4.0ch09:1950133	-5648	Solyc09g008460.3.1	Splicing factor 3A subunit 2 (AHRD V3.11 *** tr|A0A2G2VXV2|A0A2G2VXV2_CAPBA)
Replicates 1_2	SL4.0ch12	29817223	29817423	26	SL4.0ch12:29817323	-124852	Solyc12g070156.2.1	Unknown protein
Replicates 1_2	SL4.0ch02	47552798	47552998	25.7	SL4.0ch02:47552898	-204	Solyc02g086970.4.1	Aldehyde dehydrogenase (AHRD V3.3 *** A0A2U1MUY7_ARTAN)
Replicates 1_2	SL4.0ch08	9567940	9568140	53.1	SL4.0ch08:9568040	-1664	Solyc08g150111.1.1	Unknown protein
Replicates 1_2	SL4.0ch01	89830198	89830398	24	SL4.0ch01:89830298	-10593	Solyc01g150176.2.1	Er lumen protein retaining receptor-like protein (AHRD V3.3 *** A0A2K3NRD2_TRIPR)
Replicates 1_2	SL4.0ch04	51582969	51583169	24	SL4.0ch04:51583069	-39088	Solyc04g054330.3.1	Alanine-glyoxylate aminotransferase 2 (AHRD V3.3 *** A0A2U1PRH4_ARTAN)
Replicates 1_2	SL4.0ch04	60801988	60802188	24	SL4.0ch04:60802088	-566	Solyc04g077940.4.1	nucleic acid binding protein (AHRD V3.3 *-* AT1G27750.1)
Replicates 1_2	SL4.0ch10	3723254	3723454	24	SL4.0ch10:3723354	-25466	Solyc10g011660.3.1	Mitochondrial carrier protein (AHRD V3.3 *** A0A200PUN8_9MAGN)
Replicates 1_2	SL4.0ch06	47061190	47061390	23.8	SL4.0ch06:47061290	-450	Solyc06g084325.1.1	EID1-like F-box protein 3 (AHRD V3.3 *** A0A2G2ZF18_CAPAN)
Replicates 1_2	SL4.0ch05	2178910	2179110	23.3	SL4.0ch05:2179010	-317	Solyc05g007590.5.1	Unknown protein
Replicates 1_2	SL4.0ch00	1769066	1769266	27	SL4.0ch00:1769166	-49750	Solyc00g011670.1.1	E3 ubiquitin-protein ligase (AHRD V3.11 *** tr|A0A2G3CLG0|A0A2G3CLG0_CAPCH)
Replicates 1_2	SL4.0ch04	62760113	62760313	33	SL4.0ch04:62760213	-14159	Solyc04g080660.4.1	P-loop containing nucleoside triphosphate hydrolases superfamily protein (AHRD V3.11 *** tr|A0A2U1NGY3|A0A2U1NGY3_ARTAN)
Replicates 1_2	SL4.0ch06	40922737	40922937	33	SL4.0ch06:40922837	-345	Solyc06g069520.4.1	hypothetical protein (AHRD V3.3 *** AT5G07950.1)
Replicates 1_2	SL4.0ch07	65228057	65228257	33	SL4.0ch07:65228157	-33099	Solyc07g062670.1.1	Calcium-binding EF-hand family protein (AHRD V3.3 *** A0A2U1MZJ3_ARTAN)
Replicates 1_2	SL4.0ch00	534048	534248	32.7	SL4.0ch00:534148	-10546	Solyc00g500010.1.1	Unknown protein
Replicates 1_2	SL4.0ch00	716292	716492	32.2	SL4.0ch00:716392	-183623	Solyc02g010630.2.1	Unknown protein
Replicates 1_2	SL4.0ch02	34477749	34477949	18	SL4.0ch02:34477849	-41347	Solyc02g065300.1.1	Dof zinc finger protein2
Replicates 1_2	SL4.0ch00	1596179	1596379	48.4	SL4.0ch00:1596279	-7296	Solyc00g500088.2.1	Unknown protein
Replicates 1_2	SL4.0ch00	691144	691344	94	SL4.0ch00:691244	-10302	Solyc00g500015.1.1	Unknown protein
Replicates 1_2	SL4.0ch06	38903584	38903784	18	SL4.0ch06:38903684	-2264	Solyc06g150128.1.1	Transmembrane 9 superfamily member (AHRD V3.3 *** A0A2G2WKJ8_CAPBA)
Replicates 1_2	SL4.0ch12	2329163	2329363	19.2	SL4.0ch12:2329263	-5120	Solyc12g008980.3.1	O-acyltransferase (AHRD V3.3 *** A0A2G2X3X8_CAPBA)
Replicates 1_2	SL4.0ch00	9122509	9122709	69	SL4.0ch00:9122609	-10286	Solyc00g500389.1.1	Unknown protein
Replicates 1_2	SL4.0ch09	59052849	59053049	29	SL4.0ch09:59052949	-43682	Solyc09g065130.4.1	bHLH transcription factor 150
Replicates 1_2	SL4.0ch05	61864955	61865155	27	SL4.0ch05:61865055	-2208	Solyc05g052200.4.1	Transcription elongation factor TFIIS (AHRD V3.3 *** A0A2G2ZJJ8_CAPAN)
Replicates 1_2	SL4.0ch09	4147109	4147309	34	SL4.0ch09:4147209	-51	Solyc09g010820.3.1	Myb-related protein 3R-1 (AHRD V3.3 *** A0A2G2VTL7_CAPBA)
Replicates 1_2	SL4.0ch06	46924080	46924280	20	SL4.0ch06:46924180	-3296	Solyc06g084130.3.1	Jasmonate ZIM domain protein k.1 (AHRD V3.3 *** I3WTA8_NICAT)
Replicates 1_2	SL4.0ch02	47039074	47039274	19	SL4.0ch02:47039174	-5730	Solyc02g086370.4.1	Octicosapeptide/Phox/Bem1p family protein (AHRD V3.3 *-* A0A2K3L5A6_TRIPR)
Replicates 1_2	SL4.0ch08	58905593	58905793	19	SL4.0ch08:58905693	-22433	Solyc08g076860.3.1	DUF740 domain-containing protein (AHRD V3.3 *** A0A1Q3BKH7_CEPFO)
Replicates 1_2	SL4.0ch08	63005673	63005873	19	SL4.0ch08:63005773	-10212	Solyc08g081980.5.1	Arabinogalactan peptide 22 (AHRD V3.3 *** A0A2G3ADM4_CAPAN)
Replicates 1_2	SL4.0ch09	63605038	63605238	19	SL4.0ch09:63605138	-13383	Solyc09g075780.2.1	Long-chain acyl-CoA synthetase 6 (AHRD V3.3 *** A0A2U1MVC5_ARTAN)
Replicates 1_2	SL4.0ch10	14234514	14234714	19	SL4.0ch10:14234614	-327958	Solyc10g024495.1.1	Putative membrane lipoprotein (AHRD V3.3 *** AT5G17590.1)
Replicates 1_2	SL4.0ch11	5688377	5688577	19	SL4.0ch11:5688477	-6520	Solyc11g012840.2.1	F-box protein 7 (AHRD V3.3 *** A0A1U8GFR7_CAPAN)
Replicates 1_2	SL4.0ch11	25540642	25540842	19	SL4.0ch11:25540742	-28781	Solyc11g033260.2.1	MAP kinase kinase kinase 82
Replicates 1_2	SL4.0ch05	10534039	10534239	18.9	SL4.0ch05:10534139	-32482	Solyc05g015430.1.1	F-box protein (AHRD V3.11 *** tr|A0A2G2YF26|A0A2G2YF26_CAPAN)
Replicates 1_2	SL4.0ch12	1983175	1983375	18.9	SL4.0ch12:1983275	-8096	Solyc12g008510.2.1	SUN-like protein 32
Replicates 1_2	SL4.0ch03	62913791	62913991	18.7	SL4.0ch03:62913891	-2286	Solyc03g119940.3.1	Molybdate transporter like (AHRD V3.3 *** A0A2R6PTH4_ACTCH)
Replicates 1_2	SL4.0ch00	8508486	8508686	18.6	SL4.0ch00:8508586	-6915	Solyc00g500372.1.1	Unknown protein
Replicates 1_2	SL4.0ch04	5687999	5688199	25	SL4.0ch04:5688099	-10126	Solyc04g015460.4.1	extensin X55684
Replicates 1_2	SL4.0ch06	42172325	42172525	25	SL4.0ch06:42172425	-2590	Solyc06g072230.1.1	miraculin-like (AHRD V3.3 *** A0A2I4HMC5_9ROSI)
Replicates 1_2	SL4.0ch07	65028363	65028563	25	SL4.0ch07:65028463	-1044	Solyc07g062450.3.1	hypothetical protein (AHRD V3.3 *** AT3G14900.1)
Replicates 1_2	SL4.0ch10	64120564	64120764	25	SL4.0ch10:64120664	-942	Solyc10g085980.2.1	Protein MODIFIER OF SNC1 11 (AHRD V3.3 *** A0A2G2YLK2_CAPAN)
Replicates 1_2	SL4.0ch01	1548722	1548922	21	SL4.0ch01:1548822	-2104	Solyc01g006960.3.1	RNA helicase family protein (AHRD V3.3 *** A0A2U1PBZ9_ARTAN)
Replicates 1_2	SL4.0ch03	58223350	58223550	21	SL4.0ch03:58223450	-13383	Solyc03g113720.3.1	Anaphase-promoting complex subunit 8 (AHRD V3.3 *** A0A2G3AWA1_CAPCH)
Replicates 1_2	SL4.0ch04	57809871	57810071	21	SL4.0ch04:57809971	-38133	Solyc04g072870.2.1	dehydration-responsive element binding protein 3
Replicates 1_2	SL4.0ch10	64047562	64047762	21	SL4.0ch10:64047662	-2508	Solyc10g085830.2.1	dnaJ homolog subfamily C member 28 (AHRD V3.3 *** A0A2I4E0W0_9ROSI)
Replicates 1_2	SL4.0ch11	264228	264428	20.8	SL4.0ch11:264328	-6121	Solyc11g005320.1.1	RING/U-box superfamily protein (AHRD V3.3 *** A0A2U1QK74_ARTAN)
Replicates 1_2	SL4.0ch03	352773	352973	20.6	SL4.0ch03:352873	-17474	Solyc03g005470.3.1	Unknown protein
Replicates 1_2	SL4.0ch02	11813866	11814066	20.1	SL4.0ch02:11813966	-42786	Solyc02g161480.1.1	O-fucosyltransferase 3-like isoform X5 (AHRD V3.11 *-* XP_025885621.1)
Replicates 1_2	SL4.0ch12	18094419	18094619	20.1	SL4.0ch12:18094519	-19513	Solyc12g082796.1.1	Unknown protein
Replicates 1_2	SL4.0ch01	75111760	75111960	23	SL4.0ch01:75111860	-4209	Solyc01g088013.1.1	Protein transport protein SEC31-like protein B (AHRD V3.3 *** A0A2G3AKI6_CAPAN)
Replicates 1_2	SL4.0ch05	1180343	1180543	23	SL4.0ch05:1180443	-10737	Solyc05g006490.4.1	Hexosyltransferase (AHRD V3.11 *** tr|A0A2G3B8F1|A0A2G3B8F1_CAPCH)
Replicates 1_2	SL4.0ch06	2105218	2105418	23	SL4.0ch06:2105318	-38459	Solyc06g008260.3.1	Protein BREAST CANCER SUSCEPTIBILITY 1-like protein (AHRD V3.11 *** tr|A0A1J3HZN2|A0A1J3HZN2_NOCCA)
Replicates 1_2	SL4.0ch06	7916442	7916642	23	SL4.0ch06:7916542	-84897	Solyc06g011500.3.1	Unknown protein
Replicates 1_2	SL4.0ch09	13674253	13674453	23	SL4.0ch09:13674353	-14873	Solyc09g018220.3.1	RING-type E3 ubiquitin transferase (AHRD V3.3 *** A0A2G3C1I1_CAPCH)
Replicates 1_2	SL4.0ch12	64665534	64665734	23	SL4.0ch12:64665634	-2899	Solyc12g096060.2.1	Growth-regulating factor 4 (AHRD V3.3 *** A0A2G3BQA5_CAPCH)
Replicates 1_2	SL4.0ch06	38288775	38288975	22.5	SL4.0ch06:38288875	-16973	Solyc06g065160.1.1	TCP transcription factor 13
Replicates 1_2	SL4.0ch08	48100038	48100238	22.5	SL4.0ch08:48100138	-93871	Solyc08g161440.1.1	Cytokinin oxidase/dehydrogenase (AHRD V3.3 *** C3VPM8_SOLTU)
Replicates 1_2	SL4.0ch02	40854979	40855179	22.5	SL4.0ch02:40855079	-4701	Solyc02g078060.1.1	LOW QUALITY PROTEIN
Replicates 1_2	SL4.0ch12	30934504	30934704	18	SL4.0ch12:30934604	-17345	Solyc12g160580.1.1	Nipped-B-like protein (AHRD V3.3 *** A0A2R6RYV7_ACTCH)
Replicates 1_2	SL4.0ch00	692402	692602	67	SL4.0ch00:692502	-9044	Solyc00g500015.1.1	Unknown protein
Replicates 1_2	SL4.0ch00	1646124	1646324	86.9	SL4.0ch00:1646224	-57241	Solyc00g500088.2.1	Unknown protein
Replicates 1_2	SL4.0ch00	2862805	2863005	35.8	SL4.0ch00:2862905	-64726	Solyc00g160360.1.1	Unknown protein
Replicates 1_2	SL4.0ch02	50471058	50471258	21	SL4.0ch02:50471158	-1200	Solyc02g090980.1.1	MAP kinase kinase kinase 22
Replicates 1_2	SL4.0ch11	17604561	17604761	26	SL4.0ch11:17604661	-120964	Solyc11g051173.1.1	Unknown protein
Replicates 1_2	SL4.0ch08	58250043	58250243	35	SL4.0ch08:58250143	-5804	Solyc08g076080.3.1	DUF760 domain-containing protein (AHRD V3.3 *** A0A1Q3CP94_CEPFO)
Replicates 1_2	SL4.0ch00	6967392	6967592	52.5	SL4.0ch00:6967492	-32524	Solyc00g500302.1.1	Unknown protein
Replicates 1_2	SL4.0ch12	60388512	60388712	20	SL4.0ch12:60388612	-13875	Solyc12g049250.2.1	UBN2_3 domain-containing protein (AHRD V3.11 *** tr|A0A1Q3CDM9|A0A1Q3CDM9_CEPFO)
Replicates 1_2	SL4.0ch01	88572496	88572696	28	SL4.0ch01:88572596	-3507	Solyc01g109220.4.1	RING/U-box superfamily protein (AHRD V3.3 *-* A0A2U1Q188_ARTAN)
Replicates 1_2	SL4.0ch02	45144157	45144357	28	SL4.0ch02:45144257	-19439	Solyc02g083860.3.1	Transformation/transcription domain associated protein (AHRD V3.3 *** A0A2K3NKS8_TRIPR)
Replicates 1_2	SL4.0ch04	61310201	61310401	28	SL4.0ch04:61310301	-3958	Solyc04g078640.3.1	Ethylene-responsive transcription factor RAP2-1 (AHRD V3.3 *** A0A1U8GBU2_CAPAN)
Replicates 1_2	SL4.0ch10	63237918	63238118	28	SL4.0ch10:63238018	-1225	Solyc10g084630.2.1	N-acetyltransferase (AHRD V3.3 *** B6T916_MAIZE)
Replicates 1_2	SL4.0ch11	605811	606011	28	SL4.0ch11:605911	-3552	Solyc11g005740.2.1	Pectinesterase (AHRD V3.3 *** A0A2I4GT13_9ROSI)
Replicates 1_2	SL4.0ch05	1038735	1038935	20.9	SL4.0ch05:1038835	-6870	Solyc05g006330.2.1	Transducin/WD40 repeat-like superfamily protein (AHRD V3.3 *** A0A2U1QGB4_ARTAN)
Replicates 1_2	SL4.0ch00	3392705	3392905	44	SL4.0ch00:3392805	-79068	Solyc00g500176.1.1	Unknown protein
Replicates 1_2	SL4.0ch09	5769183	5769383	26	SL4.0ch09:5769283	-21793	Solyc09g014270.1.1	HXXXD-type acyl-transferase family protein (AHRD V3.3 *** V5PZN5_9CARY)
Replicates 1_2	SL4.0ch10	57443105	57443305	19	SL4.0ch10:57443205	-80504	Solyc10g074785.1.1	Unknown protein
Replicates 1_2	SL4.0ch01	89488860	89489060	24	SL4.0ch01:89488960	-6144	Solyc01g110450.3.1	Unknown protein
Replicates 1_2	SL4.0ch08	60736344	60736544	31	SL4.0ch08:60736444	-371	Solyc08g078960.4.1	Unknown protein
Replicates 1_2	SL4.0ch03	12678565	12678765	24	SL4.0ch03:12678665	-2736	Solyc03g046593.1.1	Unknown protein
Replicates 1_2	SL4.0ch01	25139571	25139771	18	SL4.0ch01:25139671	-153369	Solyc01g161370.1.1	Cytochrome b6 (AHRD V3.11 *-* tr|A0A1U8QCH4|A0A1U8QCH4_CAPAN)
Replicates 1_2	SL4.0ch03	49205810	49206010	18	SL4.0ch03:49205910	-4259	Solyc03g093370.3.1	Protein kinase family protein (AHRD V3.3 *** A0A1P8AW67_ARATH)
Replicates 1_2	SL4.0ch03	57173334	57173534	18	SL4.0ch03:57173434	-8128	Solyc03g112310.1.1	Octicosapeptide/phox/Bem1p domain kinase superfamily protein (AHRD V3.3 *-* A0A2K3MP92_TRIPR)
Replicates 1_2	SL4.0ch07	59771917	59772117	18	SL4.0ch07:59772017	-16352	Solyc07g049540.2.1	Protein-tyrosine phosphatase (AHRD V3.11 *** tr|A0A200RBI0|A0A200RBI0_9MAGN)
Replicates 1_2	SL4.0ch07	66338363	66338563	18	SL4.0ch07:66338463	-2	Solyc07g064300.3.1	hypothetical protein (AHRD V3.3 *-* AT1G50910.1)
Replicates 1_2	SL4.0ch08	60475912	60476112	18	SL4.0ch08:60476012	-11626	Solyc08g078570.3.1	Zinc finger protein (AHRD V3.3 *** A0A200PXY0_9MAGN)
Replicates 1_2	SL4.0ch09	52976540	52976740	18	SL4.0ch09:52976640	-2305	Solyc09g161270.1.1	RNA-directed DNA polymerase (AHRD V3.11 *-* tr|A0A2I0VXC8|A0A2I0VXC8_9ASPA)
Replicates 1_2	SL4.0ch10	21162302	21162502	18	SL4.0ch10:21162402	-17781	Solyc10g039393.2.1	hypothetical protein (AHRD V3.3 *** AT3G03560.1)
Replicates 1_2	SL4.0ch11	53729373	53729573	18	SL4.0ch11:53729473	-11824	Solyc11g072470.3.1	Unknown protein
Replicates 1_2	SL4.0ch00	1639327	1639527	68	SL4.0ch00:1639427	-50444	Solyc00g500088.2.1	Unknown protein
Replicates 1_2	SL4.0ch01	85846758	85846958	22	SL4.0ch01:85846858	-4247	Solyc01g105330.3.1	Chaperone protein DnaJ (AHRD V3.3 *** A0A2G2VAL8_CAPBA)
Replicates 1_2	SL4.0ch04	63390739	63390939	22	SL4.0ch04:63390839	-2911	Solyc04g081450.3.1	beta-fructofuranosidase
Replicates 1_2	SL4.0ch05	64131016	64131216	22	SL4.0ch05:64131116	-9232	Solyc05g054940.3.1	Peroxisome biogenesis protein 12 (AHRD V3.3 *** A0A2G2XWY5_CAPAN)
Replicates 1_2	SL4.0ch08	62997327	62997527	22	SL4.0ch08:62997427	-698	Solyc08g081960.3.1	Solanum Lycopersicum Cytokinin Response Factor 2
Replicates 1_2	SL4.0ch10	60470018	60470218	22	SL4.0ch10:60470118	-3906	Solyc10g079880.2.1	Calcium-binding EF-hand family protein (AHRD V3.3 *** A0A2U1NS17_ARTAN)
Replicates 1_2	SL4.0ch11	49407153	49407353	22	SL4.0ch11:49407253	-18628	Solyc11g065770.1.1	Armadillo repeat-containing protein 8-like (AHRD V3.3 *** A0A2K3NUY2_TRIPR)
Replicates 1_2	SL4.0ch01	79580442	79580642	21.6	SL4.0ch01:79580542	-11227	Solyc01g096240.4.1	P-loop containing nucleoside triphosphate hydrolases superfamily protein (AHRD V3.3 *** A0A2U1NSJ9_ARTAN)
Replicates 1_2	SL4.0ch01	87759462	87759662	21.3	SL4.0ch01:87759562	-6990	Solyc01g108100.3.1	Spire
Replicates 1_2	SL4.0ch02	31857491	31857691	20	SL4.0ch02:31857591	-3603	Solyc02g062240.3.1	Peptidyl-prolyl cis-trans isomerase (AHRD V3.3 *** A0A1U8FHR4_CAPAN)
Replicates 1_2	SL4.0ch02	36089748	36089948	20	SL4.0ch02:36089848	-3272	Solyc02g068020.1.1	Unknown protein
Replicates 1_2	SL4.0ch04	61257465	61257665	20	SL4.0ch04:61257565	-2674	Solyc04g150170.1.1	Leucine-rich repeat protein kinase family protein (AHRD V3.3 *** Q9FMI2_ARATH)
Replicates 1_2	SL4.0ch07	54965779	54965979	20	SL4.0ch07:54965879	-16658	Solyc07g042150.3.1	Pectin lyase-like superfamily protein (AHRD V3.3 *** A0A2U1LH94_ARTAN)
Replicates 1_2	SL4.0ch08	61922562	61922762	20	SL4.0ch08:61922662	-9629	Solyc08g080550.1.1	C2 calcium-dependent membrane targeting (AHRD V3.3 *** A0A2U1N7N9_ARTAN)
Replicates 1_2	SL4.0ch09	10504303	10504503	20	SL4.0ch09:10504403	-98702	Solyc09g015650.4.1	Chlorophyllide a oxygenase
Replicates 1_2	SL4.0ch10	49907455	49907655	20	SL4.0ch10:49907555	-6635	Solyc10g050840.3.1	Peptidase S9 (AHRD V3.3 *** A0A200PNL2_9MAGN)
Replicates 1_2	SL4.0ch11	2306055	2306255	19.8	SL4.0ch11:2306155	-2812	Solyc11g008060.1.1	Hyccin (AHRD V3.3 *** A0A2U1PKY1_ARTAN)
Replicates 1_2	SL4.0ch11	2967200	2967400	19.2	SL4.0ch11:2967300	-11143	Solyc11g008740.2.1	Pentatricopeptide repeat-containing protein (AHRD V3.3 *** A0A2G2VE96_CAPBA)
Replicates 1_2	SL4.0ch02	42778024	42778224	19.1	SL4.0ch02:42778124	-2946	Solyc02g080600.1.1	Ankyrin repeat (AHRD V3.11 *** tr|A0A200PYZ7|A0A200PYZ7_9MAGN)
Replicates 1_2	SL4.0ch04	2513481	2513681	24	SL4.0ch04:2513581	-6390	Solyc04g008870.3.1	Protein arginine N-methyltransferase (AHRD V3.11 *** tr|A0A2U1N672|A0A2U1N672_ARTAN)
Replicates 1_2	SL4.0ch01	2369911	2370111	29	SL4.0ch01:2370011	-4807	Solyc01g008320.3.1	Shoot gravitropism 2 (SGR2) protein (AHRD V3.3 *** A0A072UJS6_MEDTR)
Replicates 1_2	SL4.0ch12	63020453	63020653	29	SL4.0ch12:63020553	-7098	Solyc12g087960.2.1	AT-hook motif nuclear-localized protein (AHRD V3.3 *** A0A1U8GD78_CAPAN)
Replicates 1_2	SL4.0ch00	3253313	3253513	36.9	SL4.0ch00:3253413	-94813	Solyc00g500174.1.1	Unknown protein
Replicates 1_2	SL4.0ch00	1625071	1625271	45.8	SL4.0ch00:1625171	-36188	Solyc00g500088.2.1	Unknown protein
Replicates 1_2	SL4.0ch02	37229899	37230099	27	SL4.0ch02:37229999	-5701	Solyc02g069280.2.1	Argonaute 2b
Replicates 1_2	SL4.0ch02	48653121	48653321	27	SL4.0ch02:48653221	-14516	Solyc02g088530.1.1	Ubiquitin conjugation factor E4 (AHRD V3.3 *-* R4XJD8_TAPDE)
Replicates 1_2	SL4.0ch03	61977920	61978120	27	SL4.0ch03:61978020	-1614	Solyc03g118660.3.1	ERAD-associated E3 ubiquitin-protein ligase component HRD3A (AHRD V3.3 *** A0A1J3CQU4_NOCCA)
Replicates 1_2	SL4.0ch06	3454411	3454611	27	SL4.0ch06:3454511	-41055	Solyc06g009500.1.1	Pentatricopeptide repeat (AHRD V3.3 *-* A0A200QRY0_9MAGN)
Replicates 1_2	SL4.0ch10	944742	944942	26	SL4.0ch10:944842	-2844	Solyc10g006460.3.1	COBRA-like protein 10 (AHRD V3.3 *** A0A2G3ATH9_CAPCH)
Replicates 1_2	SL4.0ch12	66135968	66136168	20.7	SL4.0ch12:66136068	-489	Solyc12g099460.1.1	Unknown protein
Replicates 1_2	SL4.0ch08	9557451	9557651	58	SL4.0ch08:9557551	-12153	Solyc08g150111.1.1	Unknown protein
Replicates 1_2	SL4.0ch00	5067165	5067365	133	SL4.0ch00:5067265	-693	Solyc00g020020.2.1	Unknown protein
Replicates 1_2	SL4.0ch02	40774027	40774227	25	SL4.0ch02:40774127	-786	Solyc02g077960.4.1	Dof zinc finger protein PBF (AHRD V3.11 *** tr|A0A2G3A8C7|A0A2G3A8C7_CAPAN)
Replicates 1_2	SL4.0ch02	45759130	45759330	25	SL4.0ch02:45759230	-5539	Solyc02g084660.3.1	UPF0651 protein
Replicates 1_2	SL4.0ch03	64631495	64631695	25	SL4.0ch03:64631595	-15177	Solyc03g122310.4.1	Unknown protein
Replicates 1_2	SL4.0ch04	61430671	61430871	25	SL4.0ch04:61430771	-10182	Solyc04g078790.3.1	Transducin/WD40 repeat-like superfamily protein (AHRD V3.3 *** A0A2U1LUD4_ARTAN)
Replicates 1_2	SL4.0ch07	67000900	67001100	25	SL4.0ch07:67001000	-5663	Solyc07g065410.1.1	Mitochondrial import inner membrane translocase subunit TIM50 (AHRD V3.3 *-* A0A2G3BC84_CAPCH)
Replicates 1_2	SL4.0ch06	32765114	32765314	30	SL4.0ch06:32765214	-19587	Solyc06g051525.1.1	CTD small phosphatase-like protein (AHRD V3.3 *** A0A1J3JJA1_NOCCA)
Replicates 1_2	SL4.0ch00	9202620	9202820	29.6	SL4.0ch00:9202720	-7694	Solyc00g500398.1.1	Unknown protein
Replicates 1_2	SL4.0ch00	592204	592404	43.5	SL4.0ch00:592304	-35816	Solyc00g500014.1.1	Unknown protein
Replicates 1_2	SL4.0ch03	56144780	56144980	23	SL4.0ch03:56144880	-6967	Solyc03g111070.3.1	3-oxoacyl-reductase (AHRD V3.3 *-* B6THT6_MAIZE)
Replicates 1_2	SL4.0ch04	62563006	62563206	23	SL4.0ch04:62563106	-4155	Solyc04g080410.4.1	plasma membrane fusion protein Chr5
Replicates 1_2	SL4.0ch08	61782041	61782241	23	SL4.0ch08:61782141	-4092	Solyc08g080380.4.1	Acetylornithine aminotransferase
Replicates 1_2	SL4.0ch10	63643778	63643978	23	SL4.0ch10:63643878	-6143	Solyc10g085210.2.1	Heparanase-like protein 3 (AHRD V3.3 *** A0A1U8EH62_CAPAN)
Replicates 1_2	SL4.0ch11	49817991	49818191	23	SL4.0ch11:49818091	-6401	Solyc11g162050.1.1	Heat shock protein 70 (AHRD V3.3 *** S8C6K2_9LAMI)
Replicates 1_2	SL4.0ch12	64914544	64914744	23	SL4.0ch12:64914644	-3111	Solyc12g096510.3.1	Zinc finger protein CONSTANS-LIKE 4 (AHRD V3.3 *** A0A2G2VJD2_CAPBA)
Replicates 1_2	SL4.0ch11	1830478	1830678	22.6	SL4.0ch11:1830578	-5996	Solyc11g007550.1.1	Cytochrome P450 (AHRD V3.3 *** A0A346CEB0_TANCI)
Replicates 1_2	SL4.0ch02	50948805	50949005	22.3	SL4.0ch02:50948905	-120	Solyc02g091670.1.1	Octicosapeptide/Phox/Bem1p family protein (AHRD V3.3 *-* A0A1P8BCE3_ARATH)
Replicates 1_2	SL4.0ch01	75325423	75325623	18	SL4.0ch01:75325523	-1644	Solyc01g088300.3.1	Geranylgeranyl diphosphate reductase
Replicates 1_2	SL4.0ch01	839523	839723	21	SL4.0ch01:839623	-6001	Solyc01g006190.3.1	Unknown protein
Replicates 1_2	SL4.0ch01	69182988	69183188	21	SL4.0ch01:69183088	-12477	Solyc01g067590.3.1	Sucrose nonfermenting 4-like protein (AHRD V3.3 *** A0A2G2XRA5_CAPBA)
Replicates 1_2	SL4.0ch01	70741119	70741319	21	SL4.0ch01:70741219	-3515	Solyc01g079080.3.1	Protoporphyrinogen oxidase (AHRD V3.3 *** O64384_SOLTU)
Replicates 1_2	SL4.0ch05	8839971	8840171	21	SL4.0ch05:8840071	-34039	Solyc05g014690.3.1	BnaA02g22270D protein (AHRD V3.11 -** tr|A0A078FKB2|A0A078FKB2_BRANA)
Replicates 1_2	SL4.0ch05	60597213	60597413	21	SL4.0ch05:60597313	-7882	Solyc05g051010.4.1	40S ribosomal protein S13 (AHRD V3.3 *** A0A2I0X2R1_9ASPA)
Replicates 1_2	SL4.0ch09	50294302	50294502	21	SL4.0ch09:50294402	-11517	Solyc09g059300.1.1	Nuclear transport factor 2 (NTF2) family protein with RNA binding (RRM-RBD-RNP motifs) domain-containing protein (AHRD V3.3 *** F4J8X6_ARATH)
Replicates 1_2	SL4.0ch10	62598573	62598773	21	SL4.0ch10:62598673	-3418	Solyc10g083640.2.1	Peroxiredoxin-2E
Replicates 1_2	SL4.0ch11	5019297	5019497	21	SL4.0ch11:5019397	-81	Solyc11g012020.2.1	EH domain-containing protein 1 (AHRD V3.3 *** A0A1U8EYQ8_CAPAN)
Replicates 1_2	SL4.0ch11	7758355	7758555	21	SL4.0ch11:7758455	-13274	Solyc11g160240.1.1	Protein-tyrosine-phosphatase PTP1 (AHRD V3.3 *** A0A2G3CM37_CAPCH)
Replicates 1_2	SL4.0ch08	9331263	9331463	20.6	SL4.0ch08:9331363	-3501	Solyc08g016790.1.1	Unknown protein
Replicates 1_2	SL4.0ch05	5687065	5687265	28	SL4.0ch05:5687165	-7268	Solyc05g012350.4.1	Erlin-2 (AHRD V3.3 *** A0A2G2YD74_CAPAN)
Replicates 1_2	SL4.0ch07	67384885	67385085	27.4	SL4.0ch07:67384985	-2444	Solyc07g065960.1.1	Chaperone protein DnaJ (AHRD V3.3 *** A0A2G3C2H4_CAPCH)
Replicates 1_2	SL4.0ch02	38437507	38437707	19	SL4.0ch02:38437607	-4211	Solyc02g070830.1.1	Avr9/Cf-9 rapidly elicited protein 180 (AHRD V3.3 *** Q9FQZ1_TOBAC)
Replicates 1_2	SL4.0ch04	17511170	17511370	19	SL4.0ch04:17511270	-119586	Solyc04g026210.4.1	Ubiquitin-like-specific protease 1D (AHRD V3.3 *-* A0A2G2WSE4_CAPBA)
Replicates 1_2	SL4.0ch06	11941439	11941639	19	SL4.0ch06:11941539	-1844	Solyc06g016820.1.1	Unknown protein
Replicates 1_2	SL4.0ch06	31236384	31236584	19	SL4.0ch06:31236484	-20973	Solyc06g050740.1.1	Sel1 repeat protein (AHRD V3.3 *-* F4ISY9_ARATH)
Replicates 1_2	SL4.0ch06	39714097	39714297	19	SL4.0ch06:39714197	-2447	Solyc06g067890.3.1	Alpha/beta-Hydrolases superfamily protein (AHRD V3.3 *** A0A2U1NI49_ARTAN)
Replicates 1_2	SL4.0ch10	9283465	9283665	19	SL4.0ch10:9283565	-101007	Solyc10g150108.1.1	protein OBERON 1 (AHRD V3.11 --* XP_012069650.1)
Replicates 1_2	SL4.0ch11	42636593	42636793	19	SL4.0ch11:42636693	-70578	Solyc11g039540.1.1	Pentatricopeptide repeat-containing protein (AHRD V3.3 *-* A0A2G2WQH4_CAPBA)
Replicates 1_2	SL4.0ch11	51245585	51245785	19	SL4.0ch11:51245685	-7186	Solyc11g068480.2.1	Calcium-binding EF-hand family protein (AHRD V3.3 *** A0A2U1NS17_ARTAN)
Replicates 1_2	SL4.0ch12	9478642	9478842	19	SL4.0ch12:9478742	-33487	Solyc12g160350.1.1	Photosystem II CP43 reaction center protein (AHRD V3.11 *-* tr|A0A2G2WUM4|A0A2G2WUM4_CAPBA)
Replicates 1_2	SL4.0ch12	42433225	42433425	19	SL4.0ch12:42433325	-580903	Solyc12g035670.3.1	Nuclear pore complex protein NUP54 (AHRD V3.3 *** A0A1U8GNX0_CAPAN)
Replicates 1_2	SL4.0ch01	87759101	87759301	18.5	SL4.0ch01:87759201	-7351	Solyc01g108100.3.1	Spire
Replicates 1_2	SL4.0ch07	61680547	61680747	18.5	SL4.0ch07:61680647	-13023	Solyc07g053290.3.1	Ketol-acid reductoisomerase (AHRD V3.3 *** K4CFM5_SOLLC)
Replicates 1_2	SL4.0ch10	2623341	2623541	36	SL4.0ch10:2623441	-3428	Solyc10g008665.1.1	HXXXD-type acyl-transferase family protein (AHRD V3.11 *** tr|A0A2U1NMZ6|A0A2U1NMZ6_ARTAN)
Replicates 1_2	SL4.0ch02	49577845	49578045	26	SL4.0ch02:49577945	-8635	Solyc02g089830.2.1	TCP transcription factor 7
Replicates 1_2	SL4.0ch03	2737750	2737950	26	SL4.0ch03:2737850	-20916	Solyc03g025350.3.1	Sec-independent protein translocase protein TATB
Replicates 1_2	SL4.0ch03	47870248	47870448	26	SL4.0ch03:47870348	-45234	Solyc03g083440.4.1	OBP3-responsive protein 1 (AHRD V3.3 *** AT5G53450.1)
Replicates 1_2	SL4.0ch03	59913725	59913925	26	SL4.0ch03:59913825	-25988	Solyc03g115860.3.1	Chlorophyll a-b binding protein
Replicates 1_2	SL4.0ch12	57452490	57452690	26	SL4.0ch12:57452590	-32706	Solyc12g042505.1.1	Gibberellin-regulated family protein (AHRD V3.3 *** A0A2U1P8W2_ARTAN)
Replicates 1_2	SL4.0ch00	8236723	8236923	25.9	SL4.0ch00:8236823	-122541	Solyc00g160130.1.1	1-deoxy-D-xylulose 5-phosphate reductoisomerase
Replicates 1_2	SL4.0ch00	3382232	3382432	25.5	SL4.0ch00:3382332	-68595	Solyc00g500176.1.1	Unknown protein
Replicates 1_2	SL4.0ch08	9524282	9524482	79	SL4.0ch08:9524382	-45322	Solyc08g150111.1.1	Unknown protein
Replicates 1_2	SL4.0ch08	61346181	61346381	24	SL4.0ch08:61346281	-8995	Solyc08g079760.5.1	1-aminocyclopropane-1-carboxylate synthase (AHRD V3.3 *** Q6U5H3_ROSHC)
Replicates 1_2	SL4.0ch09	4614073	4614273	24	SL4.0ch09:4614173	-10985	Solyc09g011260.2.1	Mitochondrial glycoprotein (AHRD V3.3 *** A0A200QYU1_9MAGN)
Replicates 1_2	SL4.0ch11	51713830	51714030	24	SL4.0ch11:51713930	-6614	Solyc11g069070.4.1	heavy metal-associated isoprenylated plant protein 3-like (AHRD V3.3 *** A0A1U8EI84_CAPAN)
Replicates 1_2	SL4.0ch05	3104100	3104300	23.8	SL4.0ch05:3104200	-9595	Solyc05g008810.4.1	Octicosapeptide/Phox/Bem1p family protein (AHRD V3.3 *-* A0A2K3L5A6_TRIPR)
Replicates 1_2	SL4.0ch02	43448372	43448572	23.4	SL4.0ch02:43448472	-1120	Solyc02g150133.1.1	Plant organelle RNA recognition domain protein (AHRD V3.3 *** A0A072UXM1_MEDTR)
Replicates 1_2	SL4.0ch05	22472956	22473156	32	SL4.0ch05:22473056	-64169	Solyc05g018590.3.1	Actin-related protein 6 (AHRD V3.3 *** A0A1U8GPF8_CAPAN)
Replicates 1_2	SL4.0ch03	54248295	54248495	22	SL4.0ch03:54248395	-4053	Solyc03g097350.4.1	Protein BOLA4
Replicates 1_2	SL4.0ch06	45092572	45092772	22	SL4.0ch06:45092672	-4831	Solyc06g076300.3.1	Cyclin-dependent protein kinase inhibitor SMR5 (AHRD V3.3 -** SMR5_ARATH)
Replicates 1_2	SL4.0ch08	60307770	60307970	22	SL4.0ch08:60307870	-1613	Solyc08g078380.3.1	Ribokinase
Replicates 1_2	SL4.0ch09	60578881	60579081	22	SL4.0ch09:60578981	-33599	Solyc09g066080.3.1	Histone H1 (AHRD V3.3 *-* A0A2G2WIH1_CAPBA)
Replicates 1_2	SL4.0ch10	63759331	63759531	21.7	SL4.0ch10:63759431	-2449	Solyc10g085400.3.1	Cactin (AHRD V3.3 *** A0A2G3BFE1_CAPCH)
Replicates 1_2	SL4.0ch03	63671780	63671980	21.5	SL4.0ch03:63671880	-9740	Solyc03g121010.4.1	Protein PAF1-like protein (AHRD V3.3 *-* A0A2G3A3W1_CAPAN)
Replicates 1_2	SL4.0ch01	72139926	72140126	21.4	SL4.0ch01:72140026	-9476	Solyc01g080320.3.1	BSD domain-containing protein (AHRD V3.11 *** tr|A0A1Q3B6E5|A0A1Q3B6E5_CEPFO)
Replicates 1_2	SL4.0ch00	671599	671799	35	SL4.0ch00:671699	-29847	Solyc00g500015.1.1	Unknown protein
Replicates 1_2	SL4.0ch00	2605882	2606082	38	SL4.0ch00:2605982	-26199	Solyc00g500158.1.1	Cytochrome b6-f complex subunit 4 (AHRD V3.3 *** A0A2G2XBM1_CAPBA)
Replicates 1_2	SL4.0ch08	9437301	9437501	58	SL4.0ch08:9437401	-7402	Solyc08g150109.1.1	Unknown protein
Replicates 1_2	SL4.0ch00	3421150	3421350	34	SL4.0ch00:3421250	-59066	Solyc00g500177.1.1	Unknown protein
Replicates 1_2	SL4.0ch01	1665389	1665589	27	SL4.0ch01:1665489	-1590	Solyc01g007110.3.1	Digalactosyldiacylglycerol synthase 1
Replicates 1_2	SL4.0ch06	21962664	21962864	18	SL4.0ch06:21962764	-3424	Solyc06g034390.1.1	Protein EXORDIUM-like 7 (AHRD V3.3 *** A0A2G2X692_CAPBA)
Replicates 1_2	SL4.0ch03	63290127	63290327	20	SL4.0ch03:63290227	-7172	Solyc03g120450.4.1	Pentatricopeptide repeat (AHRD V3.11 *** tr|A0A200PVT3|A0A200PVT3_9MAGN)
Replicates 1_2	SL4.0ch04	4871031	4871231	20	SL4.0ch04:4871131	-10055	Solyc04g014570.3.1	Transmembrane 9 superfamily member (AHRD V3.3 *** A0A2G3CDP8_CAPCH)
Replicates 1_2	SL4.0ch07	63861955	63862155	20	SL4.0ch07:63862055	-1357	Solyc07g056050.1.1	Transmembrane 9 superfamily member (AHRD V3.3 *** A0A2G2Z4P1_CAPAN)
Replicates 1_2	SL4.0ch10	20573574	20573774	20	SL4.0ch10:20573674	-117587	Solyc10g039360.2.1	Unknown protein
Replicates 1_2	SL4.0ch11	2992388	2992588	20	SL4.0ch11:2992488	-8399	Solyc11g008790.3.1	Acetolactate synthase small subunit 1
Replicates 1_2	SL4.0ch00	8898099	8898299	19.8	SL4.0ch00:8898199	-9336	Solyc00g500379.1.1	Unknown protein
Replicates 1_2	SL4.0ch02	40855405	40855605	19.5	SL4.0ch02:40855505	-5127	Solyc02g078060.1.1	LOW QUALITY PROTEIN
Replicates 1_2	SL4.0ch03	64461662	64461862	19.4	SL4.0ch03:64461762	-6948	Solyc03g122040.4.1	Trihelix transcription factor ASIL2 (AHRD V3.3 *-* ASIL2_ARATH)
Replicates 1_2	SL4.0ch12	62499849	62500049	19.3	SL4.0ch12:62499949	-10992	Solyc12g056810.2.1	Oxidoreductase (AHRD V3.3 *** A0A200QCB4_9MAGN)
Replicates 1_2	SL4.0ch10	32273143	32273343	19.5	SL4.0ch10:32273243	-86212	Solyc10g045420.3.1	histone acetyltransferase GCN5 (AHRD V3.3 *** A0A2I4GKZ2_9ROSI)
Replicates 1_2	SL4.0ch00	2640598	2640798	18.3	SL4.0ch00:2640698	-60915	Solyc00g500158.1.1	Cytochrome b6-f complex subunit 4 (AHRD V3.3 *** A0A2G2XBM1_CAPBA)
Replicates 1_2	SL4.0ch01	79580268	79580468	29.4	SL4.0ch01:79580368	-11401	Solyc01g096240.4.1	P-loop containing nucleoside triphosphate hydrolases superfamily protein (AHRD V3.3 *** A0A2U1NSJ9_ARTAN)
Replicates 1_2	SL4.0ch04	13134940	13135140	18	SL4.0ch04:13135040	-651068	Solyc04g039730.3.1	ATP-citrate synthase (AHRD V3.3 *** B6TD54_MAIZE)
Replicates 1_2	SL4.0ch04	59327646	59327846	18	SL4.0ch04:59327746	-1823	Solyc04g076440.1.1	LRR receptor-like serine/threonine-protein kinase GSO1 (AHRD V3.3 *** A0A1U8F0D9_CAPAN)
Replicates 1_2	SL4.0ch06	8639304	8639504	18	SL4.0ch06:8639404	-5550	Solyc06g011662.1.1	Unknown protein
Replicates 1_2	SL4.0ch06	37248152	37248352	18	SL4.0ch06:37248252	-8563	Solyc06g062780.4.1	DEAD-box ATP-dependent RNA helicase (AHRD V3.3 *** AT5G57000.2)
Replicates 1_2	SL4.0ch07	44420491	44420691	18	SL4.0ch07:44420591	-29250	Solyc07g161230.1.1	Ribonuclease H domain (AHRD V3.11 *-* tr|A0A200Q5L7|A0A200Q5L7_9MAGN)
Replicates 1_2	SL4.0ch07	54220232	54220432	18	SL4.0ch07:54220332	-14157	Solyc07g041860.1.1	Tubulin--tyrosine ligase-like protein 12 (AHRD V3.3 *** A0A1J3IML6_NOCCA)
Replicates 1_2	SL4.0ch09	3475770	3475970	18	SL4.0ch09:3475870	-8577	Solyc09g010030.3.1	GATA zinc finger protein Chr3
Replicates 1_2	SL4.0ch09	68280971	68281171	18	SL4.0ch09:68281071	-2346	Solyc09g098410.3.1	late embryogenesis abundant protein M17-like (AHRD V3.3 *** XP_010326917.1)
Replicates 1_2	SL4.0ch10	5472885	5473085	18	SL4.0ch10:5472985	-54832	Solyc01g080390.2.1	Annexin (AHRD V3.11 --* tr|A0A2G3DIN6|A0A2G3DIN6_CAPCH)
Replicates 1_2	SL4.0ch12	10115781	10115981	18	SL4.0ch12:10115881	-20327	Solyc12g019347.1.1	cytokinin dehydrogenase 3-like (AHRD V3.3 *-* XP_015384891.1)
Replicates 1_2	SL4.0ch07	65621902	65622102	33	SL4.0ch07:65622002	-9228	Solyc07g063300.3.1	Nucleolar GTP-binding protein 2 (AHRD V3.3 *** A0A0H5RA30_9EUKA)
Replicates 1_2	SL4.0ch01	86638491	86638691	25	SL4.0ch01:86638591	-1550	Solyc01g106440.3.1	Inorganic pyrophosphatase (AHRD V3.3 *** A0A2G2W8Z5_CAPBA)
Replicates 1_2	SL4.0ch02	45176315	45176515	25	SL4.0ch02:45176415	-3084	Solyc02g083940.3.1	BnaCnng52580D protein (AHRD V3.3 *-* A0A078JGY5_BRANA)
Replicates 1_2	SL4.0ch05	61360731	61360931	25	SL4.0ch05:61360831	-5826	Solyc05g051595.2.1	CMP-sialic acid transporter 5 (AHRD V3.3 *** A0A2I4FS56_9ROSI)
Replicates 1_2	SL4.0ch06	39435908	39436108	25	SL4.0ch06:39436008	-4258	Solyc06g066550.3.1	Ethylene-responsive transcription factor (AHRD V3.3 *-* A0A2G2XMU8_CAPBA)
Replicates 1_2	SL4.0ch06	46128562	46128762	25	SL4.0ch06:46128662	-1119	Solyc06g082930.3.1	FRIGIDA-like protein (AHRD V3.3 *** A0A2G3CBV4_CAPCH)
Replicates 1_2	SL4.0ch07	66792993	66793193	25	SL4.0ch07:66793093	-2323	Solyc07g065020.3.1	Syntaxin (AHRD V3.3 *** A0A2G3C2M7_CAPCH)
Replicates 1_2	SL4.0ch08	14554332	14554532	25	SL4.0ch08:14554432	-55058	Solyc08g048150.1.1	Unknown protein
Replicates 1_2	SL4.0ch08	59457857	59458057	25	SL4.0ch08:59457957	-13949	Solyc08g077440.3.1	electron carrier/iron ion-binding protein (AHRD V3.3 *** AT1G32730.1)
Replicates 1_2	SL4.0ch10	851219	851419	25	SL4.0ch10:851319	-1030	Solyc10g006320.3.1	Vacuolar protein sorting-associated protein (AHRD V3.3 *** A0A2G2VR43_CAPBA)
Replicates 1_2	SL4.0ch03	933151	933351	24.4	SL4.0ch03:933251	-3902	Solyc03g006320.1.1	Ethylene-responsive transcription factor 4 (AHRD V3.3 *-* A0A2G2VSG2_CAPBA)
Replicates 1_2	SL4.0ch00	1625285	1625485	63.5	SL4.0ch00:1625385	-36402	Solyc00g500088.2.1	Unknown protein
Replicates 1_2	SL4.0ch01	56836278	56836478	18	SL4.0ch01:56836378	-8426	Solyc01g057760.4.1	RNA helicase DEAD2
Replicates 1_2	SL4.0ch05	8834719	8834919	23	SL4.0ch05:8834819	-39291	Solyc05g014690.3.1	BnaA02g22270D protein (AHRD V3.11 -** tr|A0A078FKB2|A0A078FKB2_BRANA)
Replicates 1_2	SL4.0ch10	61873095	61873295	18	SL4.0ch10:61873195	-2196	Solyc10g081760.3.1	Mal d 1-associated protein (AHRD V3.3 *** AT2G35900.1)
Replicates 1_2	SL4.0ch00	3170249	3170449	21	SL4.0ch00:3170349	-11749	Solyc00g500174.1.1	Unknown protein
Replicates 1_2	SL4.0ch02	33403688	33403888	21	SL4.0ch02:33403788	-4196	Solyc02g063310.2.1	U-box domain-containing protein 4-like (AHRD V3.11 *** tr|A0A2I4HV32|A0A2I4HV32_9ROSI)
Replicates 1_2	SL4.0ch02	46915646	46915846	21	SL4.0ch02:46915746	-8918	Solyc02g086160.4.1	homeobox Hox-B3-like protein (AHRD V3.3 *** AT1G67035.2)
Replicates 1_2	SL4.0ch04	63776517	63776717	21	SL4.0ch04:63776617	-3488	Solyc04g081970.3.1	Glycerate dehydrogenase HPR
Replicates 1_2	SL4.0ch05	8312876	8313076	21	SL4.0ch05:8312976	-21596	Solyc05g162270.1.1	RecQ-mediated genome instability protein 1 (AHRD V3.3 *** A0A2G3BMT0_CAPCH)
Replicates 1_2	SL4.0ch06	43669767	43669967	21	SL4.0ch06:43669867	-6666	Solyc06g074370.3.1	S-adenosyl-L-methionine-dependent methyltransferases superfamily protein (AHRD V3.3 *** AT2G27590.1)
Replicates 1_2	SL4.0ch07	58148303	58148503	21	SL4.0ch07:58148403	-26398	Solyc07g045180.4.1	hypothetical protein (AHRD V3.3 *-* AT2G04235.2)
Replicates 1_2	SL4.0ch08	40555453	40555653	21	SL4.0ch08:40555553	-273740	Solyc08g028700.2.1	Unknown protein
Replicates 1_2	SL4.0ch08	63165801	63166001	21	SL4.0ch08:63165901	-7334	Solyc08g082180.3.1	DNA primase (AHRD V3.3 *** A0A2G3ADK9_CAPAN)
Replicates 1_2	SL4.0ch10	63477477	63477677	21	SL4.0ch10:63477577	-3124	Solyc10g084970.2.1	TIP41-like protein (AHRD V3.3 *-* Q84JE0_ARATH)
Replicates 1_2	SL4.0ch11	49798925	49799125	21	SL4.0ch11:49799025	-6899	Solyc11g066070.2.1	hypothetical protein (AHRD V3.3 *** AT1G47278.3)
Replicates 1_2	SL4.0ch12	43815451	43815651	21	SL4.0ch12:43815551	-12872	Solyc12g036150.1.1	ABC transporter C family member 2 (AHRD V3.3 *-* A0A2G3DGG8_CAPCH)
Replicates 1_2	SL4.0ch10	1501996	1502196	20.8	SL4.0ch10:1502096	-104	Solyc10g007170.2.1	transcription factor GTE4-like (AHRD V3.3 *-* A0A1U7YX65_NICSY)
Replicates 1_2	SL4.0ch06	10404781	10404981	20.7	SL4.0ch06:10404881	-63392	Solyc06g160350.1.1	Unknown protein
Replicates 1_2	SL4.0ch00	9326890	9327090	20.7	SL4.0ch00:9326990	-119625	Solyc00g500397.1.1	Unknown protein
Replicates 1_2	SL4.0ch11	52600791	52600991	20.7	SL4.0ch11:52600891	-6589	Solyc11g069950.2.1	Glutaredoxin (AHRD V3.3 *** A0A118JSL8_CYNCS)
Replicates 1_2	SL4.0ch11	48976549	48976749	20.6	SL4.0ch11:48976649	-13071	Solyc11g065480.3.1	protein RETICULATA-RELATED 4
Replicates 1_2	SL4.0ch04	4013866	4014066	20.5	SL4.0ch04:4013966	-1765	Solyc04g011550.2.1	pheromone-processing carboxypeptidase KEX1-like (AHRD V3.3 --* XP_022740211.1)
Replicates 1_2	SL4.0ch03	57396363	57396563	26	SL4.0ch03:57396463	-23598	Solyc03g112600.4.1	Receptor protein kinase
Replicates 1_2	SL4.0ch08	9969830	9970030	29	SL4.0ch08:9969930	-29697	Solyc08g036660.5.1	Unknown protein
Replicates 1_2	SL4.0ch01	74698600	74698800	19	SL4.0ch01:74698700	-8498	Solyc01g087520.3.1	DNA topoisomerase 2 (AHRD V3.3 *** A0A2G2XSS9_CAPBA)
Replicates 1_2	SL4.0ch01	83882851	83883051	19	SL4.0ch01:83882951	-998	Solyc01g102960.3.1	Lycopene beta/epsilon cyclase protein (AHRD V3.3 *** A0A2U1QDC2_ARTAN)
Replicates 1_2	SL4.0ch01	88383499	88383699	19	SL4.0ch01:88383599	-2180	Solyc01g108900.5.1	maternal effect embryo arrest 14 Chr2
Replicates 1_2	SL4.0ch02	10063664	10063864	19	SL4.0ch02:10063764	-565539	Solyc02g005580.1.1	UPF0664 stress-induced protein C29B12.11c (AHRD V3.3 *** A0A1J3H3L4_NOCCA)
Replicates 1_2	SL4.0ch02	36715884	36716084	19	SL4.0ch02:36715984	-6449	Solyc02g068793.1.1	Alpha 1
Replicates 1_2	SL4.0ch03	65071096	65071296	19	SL4.0ch03:65071196	-6095	Solyc03g123900.3.1	Kelch repeat-containing protein (AHRD V3.3 *** A0A2G3D189_CAPCH)
Replicates 1_2	SL4.0ch05	2846266	2846466	19	SL4.0ch05:2846366	-16007	Solyc05g008470.3.1	Phenol hydroxylase reductase (AHRD V3.3 *** A0A200QUX1_9MAGN)
Replicates 1_2	SL4.0ch05	15970446	15970646	19	SL4.0ch05:15970546	-118468	Solyc05g016380.4.1	Unknown protein
Replicates 1_2	SL4.0ch06	4592567	4592767	19	SL4.0ch06:4592667	-26204	Solyc06g009983.1.1	Unknown protein
Replicates 1_2	SL4.0ch07	3804320	3804520	19	SL4.0ch07:3804420	-703	Solyc07g008850.3.1	WD40 repeat (AHRD V3.3 *** A0A200PQC1_9MAGN)
Replicates 1_2	SL4.0ch07	49542948	49543148	19	SL4.0ch07:49543048	-51352	Solyc07g150131.1.1	WD40 repeat (AHRD V3.11 *** tr|A0A200QDF0|A0A200QDF0_9MAGN)
Replicates 1_2	SL4.0ch07	66886463	66886663	19	SL4.0ch07:66886563	-7492	Solyc07g065170.3.1	Heavy metal-associated isoprenylated plant protein (AHRD V3.3 *-* A0A2R6RV38_ACTCH)
Replicates 1_2	SL4.0ch09	4366104	4366304	19	SL4.0ch09:4366204	-2197	Solyc09g010980.1.1	cyclin-dependent kinase inhibitor (AHRD V3.3 -** AT5G02220.1)
Replicates 1_2	SL4.0ch09	4997009	4997209	19	SL4.0ch09:4997109	-9506	Solyc09g011680.1.1	Ethylene receptor (AHRD V3.3 *-* A0A2G2WUD6_CAPBA)
Replicates 1_2	SL4.0ch10	29682518	29682718	19	SL4.0ch10:29682618	-571021	Solyc10g045050.1.1	Phosphoglycerate mutase-like protein AT74 (AHRD V3.3 *** A0A2G3D945_CAPCH)
Replicates 1_2	SL4.0ch11	49849497	49849697	19	SL4.0ch11:49849597	-7300	Solyc11g066120.3.1	osmotin
Replicates 1_2	SL4.0ch03	3702561	3702761	18.6	SL4.0ch03:3702661	-2645	Solyc03g124110.2.1	C-repeat binding factor 1
Replicates 1_2	SL4.0ch01	88753669	88753869	18.4	SL4.0ch01:88753769	-11925	Solyc01g109450.3.1	Polyol monosaccharide transporter 4
Replicates 1_2	SL4.0ch00	466860	467060	45	SL4.0ch00:466960	-11429	Solyc00g500005.1.1	Unknown protein
Replicates 1_2	SL4.0ch03	56054102	56054302	24	SL4.0ch03:56054202	-10084	Solyc03g110930.3.1	Elongator complex protein 3 (AHRD V3.11 *** tr|K4BJV4|K4BJV4_SOLLC)
Replicates 1_2	SL4.0ch04	58513866	58514066	24	SL4.0ch04:58513966	-8191	Solyc04g074580.1.1	Histone H3 (AHRD V3.3 *** A0A2K1J132_PHYPA)
Replicates 1_2	SL4.0ch10	91092	91292	24	SL4.0ch10:91192	-1115	Solyc10g005270.1.1	CDP-diacylglycerol--glycerol-3-phosphate 3-phosphatidyltransferase/cardiolipin synthase (AHRD V3.11 *-* tr|A0A2N0I349|A0A2N0I349_9SPHN)
Replicates 1_2	SL4.0ch10	2361966	2362166	24	SL4.0ch10:2362066	-12169	Solyc10g008340.4.1	GPI-anchored protein LORELEI (AHRD V3.3 *** A0A1J3HJ54_NOCCA)
Replicates 1_2	SL4.0ch08	9335632	9335832	23.8	SL4.0ch08:9335732	-7870	Solyc08g016790.1.1	Unknown protein
Replicates 1_2	SL4.0ch01	79239684	79239884	23.6	SL4.0ch01:79239784	-15595	Solyc01g095770.3.1	F-box protein (AHRD V3.3 *** A0A2G2XT66_CAPBA)
Replicates 1_2	SL4.0ch00	534312	534512	23.3	SL4.0ch00:534412	-10282	Solyc00g500010.1.1	Unknown protein
Replicates 1_2	SL4.0ch08	20765652	20765852	23.1	SL4.0ch08:20765752	-294120	Solyc08g044340.1.1	Fasciclin-like arabinogalactan protein (AHRD V3.3 *-* A0A2K3P4N3_TRIPR)
Replicates 1_2	SL4.0ch08	48032328	48032528	23	SL4.0ch08:48032428	-67473	Solyc08g061930.4.1	Cytokinin oxidase/dehydrogenase (AHRD V3.11 *** tr|C3VPM8|C3VPM8_SOLTU)
Replicates 1_2	SL4.0ch06	33082444	33082644	27	SL4.0ch06:33082544	-15108	Solyc06g051745.2.1	Cytochrome P450 (AHRD V3.3 *** A0A200PWT8_9MAGN)
Replicates 1_2	SL4.0ch11	50566343	50566543	27	SL4.0ch11:50566443	-7505	Solyc11g066770.3.1	protein RETICULATA
Replicates 1_2	SL4.0ch00	744500	744700	26.7	SL4.0ch00:744600	-155415	Solyc02g010630.2.1	Unknown protein
Replicates 1_2	SL4.0ch06	45126102	45126302	26.7	SL4.0ch06:45126202	-3373	Solyc06g076370.4.1	Protein TOC75
Replicates 1_2	SL4.0ch00	8474254	8474454	26.7	SL4.0ch00:8474354	-2046	Solyc00g500368.1.1	Unknown protein
Replicates 1_2	SL4.0ch00	1703379	1703579	22.8	SL4.0ch00:1703479	-23130	Solyc00g160160.1.1	MP domain-containing protein (AHRD V3.11 *-* tr|A0A1Q3AY57|A0A1Q3AY57_CEPFO)
Replicates 1_2	SL4.0ch00	732632	732832	32.6	SL4.0ch00:732732	-167283	Solyc02g010630.2.1	Unknown protein
Replicates 1_2	SL4.0ch01	66574885	66575085	22	SL4.0ch01:66574985	-116074	Solyc01g066293.1.1	Unknown protein
Replicates 1_2	SL4.0ch01	78510987	78511187	22	SL4.0ch01:78511087	-2176	Solyc01g094830.4.1	RING/U-box superfamily protein (AHRD V3.3 *** A0A2U1M4T4_ARTAN)
Replicates 1_2	SL4.0ch02	46713890	46714090	22	SL4.0ch02:46713990	-1392	Solyc02g085920.3.1	Peroxidase (AHRD V3.3 *** K4BBA2_SOLLC)
Replicates 1_2	SL4.0ch04	58706936	58707136	22	SL4.0ch04:58707036	-20244	Solyc04g074810.4.1	ENTH/ANTH/VHS superfamily protein (AHRD V3.3 *** A0A2U1QGP5_ARTAN)
Replicates 1_2	SL4.0ch06	5075370	5075570	22	SL4.0ch06:5075470	-46903	Solyc06g010140.1.1	Unknown protein
Replicates 1_2	SL4.0ch10	47436898	47437098	22	SL4.0ch10:47436998	-240860	Solyc10g050227.1.1	ATP-dependent DNA helicase (AHRD V3.11 *-* tr|K3YXY4|K3YXY4_SETIT)
Replicates 1_2	SL4.0ch12	65533633	65533833	22	SL4.0ch12:65533733	-8431	Solyc12g098510.1.1	Heat stress transcription factor A-5 (AHRD V3.3 *** A0A2G3AV96_CAPCH)
Replicates 1_2	SL4.0ch00	7887563	7887763	21.4	SL4.0ch00:7887663	-85271	Solyc00g500355.1.1	Polyadenylate-binding protein RBP47B (AHRD V3.11 *-* tr|A0A2G3BE08|A0A2G3BE08_CAPCH)
Replicates 1_2	SL4.0ch10	60624233	60624433	19	SL4.0ch10:60624333	-285	Solyc10g080120.1.1	Cytoplasmic tRNA 2-thiolation protein 2 (AHRD V3.3 *** A0A2G2YNS4_CAPAN)
Replicates 1_2	SL4.0ch08	9392226	9392426	69	SL4.0ch08:9392326	-21949	Solyc08g016792.1.1	Unknown protein
Replicates 1_2	SL4.0ch11	17708789	17708989	18.1	SL4.0ch11:17708889	-13376	Solyc11g051172.1.1	Unknown protein
Replicates 1_2	SL4.0ch01	80043456	80043656	20	SL4.0ch01:80043556	-10840	Solyc01g096800.3.1	pre-rRNA-processing protein TSR2-like (AHRD V3.3 *** A0A2I4GN69_9ROSI)
Replicates 1_2	SL4.0ch02	46271274	46271474	20	SL4.0ch02:46271374	-7105	Solyc02g085330.1.1	Transcription factor GRAS (AHRD V3.3 *** A0A200Q206_9MAGN)
Replicates 1_2	SL4.0ch03	45102825	45103025	20	SL4.0ch03:45102925	-154434	Solyc03g078360.1.1	3-ketoacyl-CoA synthase (AHRD V3.3 *** A0A2G2VZG2_CAPBA)
Replicates 1_2	SL4.0ch05	61853795	61853995	20	SL4.0ch05:61853895	-1116	Solyc05g052160.4.1	Acyl-CoA N-acyltransferases (NAT) superfamily protein Chr4
Replicates 1_2	SL4.0ch07	62080243	62080443	20	SL4.0ch07:62080343	-841	Solyc07g053730.4.1	Unknown protein
Replicates 1_2	SL4.0ch10	757761	757961	20	SL4.0ch10:757861	-6946	Solyc10g006130.1.1	Acid phosphatase/vanadium-dependent haloperoxidase-related protein (AHRD V3.3 *** Q8L7M6_ARATH)
Replicates 1_2	SL4.0ch10	54657376	54657576	20	SL4.0ch10:54657476	-29702	Solyc10g054550.1.1	V-type proton ATPase proteolipid subunit (AHRD V3.3 *** A0A2I4E7G5_9ROSI)
Replicates 1_2	SL4.0ch11	5539858	5540058	20	SL4.0ch11:5539958	-6274	Solyc11g012730.3.1	Trihelix transcription factor (AHRD V3.3 *-* B0EW03_SOYBN)
Replicates 1_2	SL4.0ch11	16865955	16866155	20	SL4.0ch11:16866055	-63702	Solyc11g050990.1.1	Pectinesterase (AHRD V3.3 *-* A0A2I4EXI8_9ROSI)
Replicates 1_2	SL4.0ch11	50422906	50423106	20	SL4.0ch11:50423006	-17507	Solyc11g066640.1.1	aspartic proteinase-like protein 2 (AHRD V3.3 *** A0A1U7W5P3_NICSY)
Replicates 1_2	SL4.0ch05	61335877	61336077	19.3	SL4.0ch05:61335977	-12704	Solyc05g051580.3.1	Mitochondrial substrate carrier family protein (AHRD V3.11 *** tr|A0A1P8BDA7|A0A1P8BDA7_ARATH)
Replicates 1_2	SL4.0ch04	61011111	61011311	19.2	SL4.0ch04:61011211	-4672	Solyc04g078240.3.1	metal transporter Nramp2
Replicates 1_2	SL4.0ch02	37399226	37399426	19.2	SL4.0ch02:37399326	-4785	Solyc02g069520.2.1	Protein LIGHT-DEPENDENT SHORT HYPOCOTYLS 6 (AHRD V3.3 *** A0A2G3D431_CAPCH)
Replicates 1_2	SL4.0ch04	1711311	1711511	19.1	SL4.0ch04:1711411	-7566	Solyc04g008010.4.1	RING/U-box superfamily protein (AHRD V3.3 *** Q93YQ5_ARATH)
Replicates 1_2	SL4.0ch06	46438019	46438219	28	SL4.0ch06:46438119	-2671	Solyc06g083460.4.1	NAD(P)-binding Rossmann-fold superfamily protein (AHRD V3.11 *** tr|F4IKL5|F4IKL5_ARATH)
Replicates 1_2	SL4.0ch01	79042109	79042309	27.4	SL4.0ch01:79042209	-10952	Solyc01g095540.3.1	Mitochondrial carrier protein (AHRD V3.3 *** A0A200PUN8_9MAGN)
Replicates 1_2	SL4.0ch05	45357076	45357276	18	SL4.0ch05:45357176	-209029	Solyc05g032700.4.1	Unknown protein
Replicates 1_2	SL4.0ch00	941683	941883	18.3	SL4.0ch00:941783	-25601	Solyc00g500016.1.1	Unknown protein
Replicates 1_2	SL4.0ch06	10551169	10551369	19.6	SL4.0ch06:10551269	-88247	Solyc06g016670.1.1	Unknown protein
Replicates 1_2	SL4.0ch00	2939560	2939760	18	SL4.0ch00:2939660	-15090	Solyc00g500163.1.1	Unknown protein
Replicates 1_2	SL4.0ch01	59133288	59133488	18	SL4.0ch01:59133388	-16386	Solyc01g058280.4.1	ER membrane protein complex subunit 6-like (AHRD V3.3 *** A0A2I4GTM2_9ROSI)
Replicates 1_2	SL4.0ch01	64544253	64544453	18	SL4.0ch01:64544353	-29209	Solyc01g065500.3.1	leucine-rich repeat extensin-like protein 6 (AHRD V3.3 *-* XP_010321602.1)
Replicates 1_2	SL4.0ch01	84759703	84759903	18	SL4.0ch01:84759803	-3943	Solyc01g103980.4.1	E3 ubiquitin-protein ligase RNF170-like protein (DUF 1232) (AHRD V3.3 *** Q0WWX8_ARATH)
Replicates 1_2	SL4.0ch01	87597769	87597969	18	SL4.0ch01:87597869	-14569	Solyc01g107880.3.1	O-acyltransferase WSD1-like protein (AHRD V3.3 *** A0A2K3ND41_TRIPR)
Replicates 1_2	SL4.0ch03	58571834	58572034	18	SL4.0ch03:58571934	-7722	Solyc03g114110.4.1	NHL domain protein (AHRD V3.3 *** AT5G14895.1)
Replicates 1_2	SL4.0ch04	1397097	1397297	18	SL4.0ch04:1397197	-9135	Solyc04g007660.1.1	Sn-2 protein (AHRD V3.11 *** tr|Q39467|Q39467_CAPAN)
Replicates 1_2	SL4.0ch07	61900805	61901005	18	SL4.0ch07:61900905	-21194	Solyc07g150145.2.1	Glutaredoxin-C9 (AHRD V3.3 *** A0A2G2WE57_CAPBA)
Replicates 1_2	SL4.0ch08	63395272	63395472	18	SL4.0ch08:63395372	-2670	Solyc08g082460.4.1	Late embryogenesis abundant (LEA) hydroxyproline-rich glycoprotein family (AHRD V3.3 *** Q9T0A8_ARATH)
Replicates 1_2	SL4.0ch09	46676229	46676429	18	SL4.0ch09:46676329	-5746	Solyc09g161000.1.1	zinc-finger homeodomain protein 4-like (AHRD V3.11 *-* XP_010314609.1)
Replicates 1_2	SL4.0ch10	2996837	2997037	18	SL4.0ch10:2996937	-6131	Solyc10g009090.3.1	Mitochondrial substrate carrier family protein (AHRD V3.3 *** A0A1P8B094_ARATH)
Replicates 1_2	SL4.0ch10	5201885	5202085	18	SL4.0ch10:5201985	-27248	Solyc10g017560.1.1	RNA helicase DEAD33
Replicates 1_2	SL4.0ch12	6762313	6762513	18	SL4.0ch12:6762413	-15869	Solyc12g017470.2.1	GDSL esterase/lipase At5g03980-like (AHRD V3.3 *** A0A1S3YRJ5_TOBAC)
Replicates 1_2	SL4.0ch12	33543490	33543690	18	SL4.0ch12:33543590	-130458	Solyc12g062650.1.1	Unknown protein
Replicates 1_2	SL4.0ch01	1811809	1812009	23	SL4.0ch01:1811909	-1959	Solyc01g007240.3.1	Late embryogenesis abundant (LEA) hydroxyproline-rich glycoprotein family (AHRD V3.3 *** O82294_ARATH)
Replicates 1_2	SL4.0ch01	77384460	77384660	23	SL4.0ch01:77384560	-3004	Solyc01g091520.3.1	Enoyl-CoA delta isomerase 1
Replicates 1_2	SL4.0ch02	9510663	9510863	23	SL4.0ch02:9510763	-12538	Solyc02g005580.1.1	Unknown protein
Replicates 1_2	SL4.0ch03	62606378	62606578	23	SL4.0ch03:62606478	-21298	Solyc03g119580.1.1	NIMIN2b protein (AHRD V3.3 *** Q0MR95_TOBAC)
Replicates 1_2	SL4.0ch04	61721460	61721660	23	SL4.0ch04:61721560	-1301	Solyc04g079190.5.1	Succinate dehydrogenase subunit 5
Replicates 1_2	SL4.0ch05	62811923	62812123	23	SL4.0ch05:62812023	-3584	Solyc05g053300.3.1	Protein phosphatase-2C (AHRD V3.3 *** O82469_MESCR)
Replicates 1_2	SL4.0ch06	39228894	39229094	23	SL4.0ch06:39228994	-8831	Solyc06g066270.1.1	2-(3-amino-3-carboxypropyl)histidine synthase subunit 1 (AHRD V3.3 *** A0A2G3C7T2_CAPCH)
Replicates 1_2	SL4.0ch10	96684	96884	23	SL4.0ch10:96784	-982	Solyc10g005300.3.1	CDP-diacylglycerol--glycerol-3-phosphate 3-phosphatidyltransferase/cardiolipin synthase (AHRD V3.11 *-* tr|A0A2N0I349|A0A2N0I349_9SPHN)
Replicates 1_2	SL4.0ch11	4768839	4769039	23	SL4.0ch11:4768939	-1696	Solyc11g011730.1.1	Auxin-responsive protein SAUR65 (AHRD V3.3 *** A0A2G3B0T7_CAPCH)
Replicates 1_2	SL4.0ch04	12318485	12318685	22.2	SL4.0ch04:12318585	-3980	Solyc04g039775.1.1	Unknown protein
Replicates 1_2	SL4.0ch07	62913483	62913683	18	SL4.0ch07:62913583	-7153	Solyc07g054800.1.1	Unknown protein
Replicates 1_2	SL4.0ch12	17921227	17921427	18	SL4.0ch12:17921327	-14372	Solyc12g082791.1.1	Unknown protein
Replicates 1_2	SL4.0ch03	5087239	5087439	29	SL4.0ch03:5087339	-9426	Solyc03g033640.3.1	Zinc finger CCCH domain-containing protein 44 (AHRD V3.3 *** A0A2G3CKZ0_CAPCH)
Replicates 1_2	SL4.0ch08	9514427	9514627	131.8	SL4.0ch08:9514527	-1209	Solyc08g016796.1.1	Unknown protein
Replicates 1_2	SL4.0ch02	9558230	9558430	19	SL4.0ch02:9558330	-34794	Solyc02g005600.1.1	Ubiquitin carboxyl-terminal hydrolase 21 (AHRD V3.3 *-* A0A2G3AFL7_CAPAN)
Replicates 1_2	SL4.0ch00	937581	937781	21	SL4.0ch00:937681	-21499	Solyc00g500016.1.1	Unknown protein
Replicates 1_2	SL4.0ch03	63017921	63018121	21	SL4.0ch03:63018021	-14206	Solyc03g120090.1.1	periodic tryptophan protein 2 homolog (AHRD V3.3 *** A0A2I4EVX9_9ROSI)
Replicates 1_2	SL4.0ch10	56126222	56126422	21	SL4.0ch10:56126322	-21509	Solyc10g055620.2.1	SKP1-like protein (AHRD V3.3 *** O82463_NICCL)
Replicates 1_2	SL4.0ch01	90222730	90222930	20.9	SL4.0ch01:90222830	-12597	Solyc01g111690.3.1	transmembrane protein%2C putative (DUF1279) (AHRD V3.3 *** AT2G20940.2)
Replicates 1_2	SL4.0ch10	20691612	20691812	20.2	SL4.0ch10:20691712	-56381	Solyc10g150113.1.1	DUF1639 domain-containing protein (AHRD V3.3 *-* A0A1Q3BZV8_CEPFO)
Replicates 1_3	SL4.0ch04	57006859	57007059	102.5	SL4.0ch04:57006959	-11456	Solyc04g072039.1.1	Polyadenylate-binding protein (AHRD V3.3 *** A0A2G3CN64_CAPCH)
Replicates 1_3	SL4.0ch00	3703727	3703927	199	SL4.0ch00:3703827	-338	Solyc00g500183.1.1	NADH dehydrogenase subunit 7 (AHRD V3.3 *-* A0A220T1K3_9ROSI)
Replicates 1_3	SL4.0ch12	64593522	64593722	75	SL4.0ch12:64593622	-3164	Solyc12g095970.3.1	Late embryogenesis abundant (LEA) hydroxyproline-rich glycoprotein family (AHRD V3.3 *** A0A2U1MMJ0_ARTAN)
Replicates 1_3	SL4.0ch00	9189825	9190025	145	SL4.0ch00:9189925	-8668	Solyc00g500396.1.1	Unknown protein
Replicates 1_3	SL4.0ch04	59913873	59914073	65	SL4.0ch04:59913973	-13173	Solyc04g076960.4.1	Transcription factor (AHRD V3.3 *** A0A2U1NHT6_ARTAN)
Replicates 1_3	SL4.0ch00	9189720	9189920	125.4	SL4.0ch00:9189820	-8563	Solyc00g500396.1.1	Unknown protein
Replicates 1_3	SL4.0ch00	9189593	9189793	175.1	SL4.0ch00:9189693	-8436	Solyc00g500396.1.1	Unknown protein
Replicates 1_3	SL4.0ch06	42257854	42258054	62	SL4.0ch06:42257954	-12289	Solyc06g072300.4.1	Homeobox-leucine zipper protein ROC8 (AHRD V3.3 *** A0A2G2V7B9_CAPBA)
Replicates 1_3	SL4.0ch05	2821288	2821488	72.6	SL4.0ch05:2821388	-2238	Solyc05g008420.4.1	Repressor of RNA polymerase III transcription (AHRD V3.3 *** A0A1U8F9V8_CAPAN)
Replicates 1_3	SL4.0ch00	3731685	3731885	148	SL4.0ch00:3731785	-3694	Solyc00g023700.2.1	orf100 (mitochondrion) (AHRD V3.3 *** YP_005090391.1)
Replicates 1_3	SL4.0ch00	3731827	3732027	152	SL4.0ch00:3731927	-3552	Solyc00g023700.2.1	orf100 (mitochondrion) (AHRD V3.3 *** YP_005090391.1)
Replicates 1_3	SL4.0ch10	60148077	60148277	59.3	SL4.0ch10:60148177	-4115	Solyc10g079490.2.1	Inosine-5'-monophosphate dehydrogenase (AHRD V3.3 *** A0A2G2VW93_CAPBA)
Replicates 1_3	SL4.0ch01	87099097	87099297	44.1	SL4.0ch01:87099197	-16188	Solyc01g107180.3.1	Zinc finger protein (AHRD V3.3 *** A0T3Q5_SOLTU)
Replicates 1_3	SL4.0ch05	2583449	2583649	54.5	SL4.0ch05:2583549	-1375	Solyc05g008120.4.1	Unknown protein
Replicates 1_3	SL4.0ch02	43018684	43018884	68	SL4.0ch02:43018784	-2195	Solyc02g080955.1.1	Pentatricopeptide repeat-containing protein (AHRD V3.3 *** A0A2G2XFX2_CAPBA)
Replicates 1_3	SL4.0ch07	60721422	60721622	51	SL4.0ch07:60721522	-28764	Solyc07g052340.4.1	Unknown protein
Replicates 1_3	SL4.0ch05	64991097	64991297	62	SL4.0ch05:64991197	-8729	Solyc05g056270.3.1	Aspartate--tRNA ligase
Replicates 1_3	SL4.0ch05	2178704	2178904	46.7	SL4.0ch05:2178804	-111	Solyc05g007590.5.1	Aminotransferase
Replicates 1_3	SL4.0ch08	9567248	9567448	124.3	SL4.0ch08:9567348	-2356	Solyc08g150111.1.1	Unknown protein
Replicates 1_3	SL4.0ch06	47061020	47061220	59	SL4.0ch06:47061120	-620	Solyc06g084325.1.1	EID1-like F-box protein 3 (AHRD V3.3 *** A0A2G2ZF18_CAPAN)
Replicates 1_3	SL4.0ch11	2918112	2918312	53	SL4.0ch11:2918212	-1917	Solyc11g008700.2.1	30S ribosomal protein S5 (AHRD V3.3 *** A0A1J3IX82_NOCCA)
Replicates 1_3	SL4.0ch01	5682957	5683157	41.9	SL4.0ch01:5683057	-27803	Solyc01g010660.3.1	NAD(P)-linked oxidoreductase superfamily protein (AHRD V3.3 *** Q949S6_ARATH)
Replicates 1_3	SL4.0ch00	4728759	4728959	107	SL4.0ch00:4728859	-79389	Solyc00g160460.1.1	Unknown protein
Replicates 1_3	SL4.0ch12	64249862	64250062	52	SL4.0ch12:64249962	-2750	Solyc12g094570.1.1	inactive purple acid phosphatase-like protein (AHRD V3.3 *-* AT1G42430.1)
Replicates 1_3	SL4.0ch01	73901063	73901263	45	SL4.0ch01:73901163	-4956	Solyc01g086700.4.1	Sister chromatid cohesion 1 protein 4 (AHRD V3.3 *** A0A2G3DGK5_CAPCH)
Replicates 1_3	SL4.0ch04	7832554	7832754	48	SL4.0ch04:7832654	-6742	Solyc04g017720.3.1	Zinc finger transcription factor 32
Replicates 1_3	SL4.0ch03	64045527	64045727	56	SL4.0ch03:64045627	-1898	Solyc03g121530.3.1	WAS/WASL-interacting family protein (AHRD V3.3 *** AT1G55160.1)
Replicates 1_3	SL4.0ch06	38249126	38249326	43	SL4.0ch06:38249226	-11955	Solyc06g065073.1.1	R2R3MYB transcription factor 3
Replicates 1_3	SL4.0ch02	52059606	52059806	62	SL4.0ch02:52059706	-17483	Solyc02g093040.4.1	tRNA-dihydrouridine synthase (AHRD V3.3 *** A0A2G3D8C2_CAPCH)
Replicates 1_3	SL4.0ch01	80909525	80909725	54	SL4.0ch01:80909625	-8141	Solyc01g098020.2.1	S-adenosyl-L-methionine-dependent methyltransferases superfamily protein (AHRD V3.3 *** Q9MAA9_ARATH)
Replicates 1_3	SL4.0ch08	60106091	60106291	41.7	SL4.0ch08:60106191	-11989	Solyc08g078160.3.1	Ethylene-responsive transcription factor 2 (AHRD V3.3 *** A0A2G3DC56_CAPCH)
Replicates 1_3	SL4.0ch09	67459072	67459272	34	SL4.0ch09:67459172	-881	Solyc09g092220.3.1	magnesium transporter NIPA (DUF803) (AHRD V3.3 *** AT4G13800.8)
Replicates 1_3	SL4.0ch05	2255763	2255963	51	SL4.0ch05:2255863	-1126	Solyc05g007740.3.1	Mitochondrial carrier protein (AHRD V3.3 *** A0A200QP40_9MAGN)
Replicates 1_3	SL4.0ch05	23614215	23614415	48	SL4.0ch05:23614315	-329322	Solyc05g018810.5.1	RING/U-box superfamily protein (AHRD V3.3 *-* Q3EAE6_ARATH)
Replicates 1_3	SL4.0ch08	60770011	60770211	44.1	SL4.0ch08:60770111	-10211	Solyc08g078990.3.1	C2H2-like zinc finger protein (AHRD V3.3 *-* A0A2U1KP34_ARTAN)
Replicates 1_3	SL4.0ch03	9466459	9466659	53	SL4.0ch03:9466559	-2702	Solyc03g044600.2.1	transmembrane protein%2C putative (DUF1279) (AHRD V3.3 *** AT2G20940.2)
Replicates 1_3	SL4.0ch01	74789355	74789555	62	SL4.0ch01:74789455	-8591	Solyc01g087600.3.1	Polyamine oxidase (AHRD V3.3 *** Q4H439_TOBAC)
Replicates 1_3	SL4.0ch00	591795	591995	91.7	SL4.0ch00:591895	-36225	Solyc00g500014.1.1	Unknown protein
Replicates 1_3	SL4.0ch06	28858003	28858203	49	SL4.0ch06:28858103	-6733	Solyc06g048510.5.1	WD-40 repeat containing protein (AHRD V3.11 *** tr|A0A0K0XR03|A0A0K0XR03_TOBAC)
Replicates 1_3	SL4.0ch02	43933235	43933435	40	SL4.0ch02:43933335	-13579	Solyc02g082230.4.1	Thioredoxin reductase (AHRD V3.3 *** A0A2G3D6M1_CAPCH)
Replicates 1_3	SL4.0ch09	753341	753541	40	SL4.0ch09:753441	-7033	Solyc09g007100.3.1	Protein MODIFIER OF SNC1 11 (AHRD V3.11 *** tr|A0A2G2VZF0|A0A2G2VZF0_CAPBA)
Replicates 1_3	SL4.0ch05	2256839	2257039	54	SL4.0ch05:2256939	-50	Solyc05g007740.3.1	Pentatricopeptide repeat-containing protein (AHRD V3.3 *** A0A2G3B7P9_CAPCH)
Replicates 1_3	SL4.0ch02	47588683	47588883	46	SL4.0ch02:47588783	-4787	Solyc02g087020.1.1	NHL domain protein (AHRD V3.3 *** A0A1P8BDM5_ARATH)
Replicates 1_3	SL4.0ch06	20055860	20056060	46	SL4.0ch06:20055960	-212263	Solyc06g160530.1.1	Unknown protein
Replicates 1_3	SL4.0ch09	63618505	63618705	46	SL4.0ch09:63618605	-1230	Solyc09g075790.3.1	long chain acyl-CoA synthetase 6
Replicates 1_3	SL4.0ch00	6840376	6840576	126	SL4.0ch00:6840476	-8577	Solyc00g500288.1.1	Unknown protein
Replicates 1_3	SL4.0ch08	9504534	9504734	146	SL4.0ch08:9504634	-3306	Solyc08g150110.1.1	Unknown protein
Replicates 1_3	SL4.0ch08	718802	719002	59.9	SL4.0ch08:718902	-3595	Solyc08g005920.3.1	F-box/kelch-repeat protein SKIP25 (AHRD V3.3 *** A0A2G2XM52_CAPBA)
Replicates 1_3	SL4.0ch05	59828197	59828397	45	SL4.0ch05:59828297	-723	Solyc05g050310.1.1	Glycosyl hydrolase superfamily protein (AHRD V3.3 *** A0A2U1QD96_ARTAN)
Replicates 1_3	SL4.0ch01	208955	209155	42	SL4.0ch01:209055	-686	Solyc01g005253.1.1	Aspartate-semialdehyde dehydrogenase (AHRD V3.11 *** tr|A0A2G3AYJ3|A0A2G3AYJ3_CAPCH)
Replicates 1_3	SL4.0ch01	89942721	89942921	47	SL4.0ch01:89942821	-3176	Solyc01g111280.3.1	Cold-shock protein (AHRD V3.3 *-* A0A200RAC1_9MAGN)
Replicates 1_3	SL4.0ch11	2608399	2608599	38	SL4.0ch11:2608499	-7798	Solyc11g008350.2.1	Pseudouridine synthase family protein (AHRD V3.3 *** A0A1P8AXV3_ARATH)
Replicates 1_3	SL4.0ch10	60147870	60148070	37.7	SL4.0ch10:60147970	-3908	Solyc10g079490.2.1	Inosine-5'-monophosphate dehydrogenase (AHRD V3.3 *** A0A2G2VW93_CAPBA)
Replicates 1_3	SL4.0ch02	43347912	43348112	41	SL4.0ch02:43348012	-3998	Solyc02g081370.2.1	AMP-dependent synthetase/ligase (AHRD V3.3 *** A0A200PYF6_9MAGN)
Replicates 1_3	SL4.0ch11	52942865	52943065	41	SL4.0ch11:52942965	-2244	Solyc11g071360.1.1	Pentatricopeptide repeat (AHRD V3.3 *** A0A200QJM0_9MAGN)
Replicates 1_3	SL4.0ch05	2821540	2821740	40.4	SL4.0ch05:2821640	-1986	Solyc05g008420.4.1	Repressor of RNA polymerase III transcription (AHRD V3.3 *** A0A1U8F9V8_CAPAN)
Replicates 1_3	SL4.0ch07	66611353	66611553	49	SL4.0ch07:66611453	-2763	Solyc07g064800.3.1	Threonine--tRNA ligase
Replicates 1_3	SL4.0ch09	63108636	63108836	49	SL4.0ch09:63108736	-6491	Solyc09g075060.3.1	Beta-glucosidase 1 (AHRD V3.3 *** A0A1U8F8A5_CAPAN)
Replicates 1_3	SL4.0ch00	9250888	9251088	66.9	SL4.0ch00:9250988	-2929	Solyc00g500402.1.1	Unknown protein
Replicates 1_3	SL4.0ch04	4013535	4013735	33.6	SL4.0ch04:4013635	-2096	Solyc04g011550.2.1	pheromone-processing carboxypeptidase KEX1-like (AHRD V3.3 --* XP_022740211.1)
Replicates 1_3	SL4.0ch10	945062	945262	45.4	SL4.0ch10:945162	-2524	Solyc10g006460.3.1	COBRA-like protein 10 (AHRD V3.3 *** A0A2G3ATH9_CAPCH)
Replicates 1_3	SL4.0ch05	485010	485210	43	SL4.0ch05:485110	-1592	Solyc05g005630.4.1	RNA-binding protein 25-like (AHRD V3.3 *** A0A2K3LLK7_TRIPR)
Replicates 1_3	SL4.0ch09	66286003	66286203	36.8	SL4.0ch09:66286103	-8688	Solyc09g090770.2.1	Major facilitator superfamily protein (AHRD V3.3 *** A0A2U1PVI2_ARTAN)
Replicates 1_3	SL4.0ch02	44211214	44211414	29	SL4.0ch02:44211314	-8699	Solyc02g082550.3.1	Calcium-binding EF hand family protein (AHRD V3.3 *** A0A1P8AQ08_ARATH)
Replicates 1_3	SL4.0ch01	74193024	74193224	29	SL4.0ch01:74193124	-11255	Solyc01g087005.1.1	Unknown protein
Replicates 1_3	SL4.0ch10	63759163	63759363	28.1	SL4.0ch10:63759263	-2	Solyc10g085410.3.1	Cactin (AHRD V3.3 *** A0A2G3BFE1_CAPCH)
Replicates 1_3	SL4.0ch10	55574810	55575010	45	SL4.0ch10:55574910	-10801	Solyc10g055230.1.1	Cold-shock protein (AHRD V3.3 *-* A0A200RAC1_9MAGN)
Replicates 1_3	SL4.0ch03	937093	937293	36	SL4.0ch03:937193	-19138	Solyc03g006350.3.1	Ethylene-responsive transcription factor 4 (AHRD V3.3 *-* A0A2G2VSG2_CAPBA)
Replicates 1_3	SL4.0ch04	2219963	2220163	36	SL4.0ch04:2220063	-4846	Solyc04g008590.3.1	Ankyrin repeat (AHRD V3.3 *** A0A200R764_9MAGN)
Replicates 1_3	SL4.0ch07	407613	407813	36	SL4.0ch07:407713	-12045	Solyc07g005520.1.1	Ubiquitin carboxyl-terminal hydrolase 23 (AHRD V3.3 *** A0A1U8HH33_CAPAN)
Replicates 1_3	SL4.0ch00	6805072	6805272	83.3	SL4.0ch00:6805172	-57889	Solyc00g500290.2.1	Unknown protein
Replicates 1_3	SL4.0ch08	2649910	2650110	38.7	SL4.0ch08:2650010	-6237	Solyc08g008160.4.1	Calcium-dependent protein kinase (AHRD V3.3 *** B2KTA5_WHEAT)
Replicates 1_3	SL4.0ch01	74214915	74215115	47	SL4.0ch01:74215015	-9862	Solyc01g087030.3.1	Photosystem II PsbP (AHRD V3.3 *** A0A200Q959_9MAGN)
Replicates 1_3	SL4.0ch08	9515174	9515374	193	SL4.0ch08:9515274	-462	Solyc08g016796.1.1	Unknown protein
Replicates 1_3	SL4.0ch04	52905564	52905764	32	SL4.0ch04:52905664	-23680	Solyc04g055060.3.1	VQ motif-containing protein (AHRD V3.3 *-* Q9C8B9_ARATH)
Replicates 1_3	SL4.0ch05	5687045	5687245	28	SL4.0ch05:5687145	-7288	Solyc05g012350.4.1	Erlin-2 (AHRD V3.3 *** A0A2G2YD74_CAPAN)
Replicates 1_3	SL4.0ch08	9522236	9522436	116.5	SL4.0ch08:9522336	-47368	Solyc08g150111.1.1	Unknown protein
Replicates 1_3	SL4.0ch04	56980905	56981105	40.7	SL4.0ch04:56981005	-18441	Solyc04g072040.1.1	LRR receptor-like kinase (AHRD V3.3 *** A0A072VNN3_MEDTR)
Replicates 1_3	SL4.0ch02	41006591	41006791	35	SL4.0ch02:41006691	-24043	Solyc02g078250.4.1	DNA ligase-like protein (AHRD V3.3 *** AT2G33793.2)
Replicates 1_3	SL4.0ch11	52471474	52471674	35	SL4.0ch11:52471574	-24618	Solyc11g069765.1.1	P-loop NTPase domain-containing protein LPA1-like protein 1 (AHRD V3.3 *** A0A2G3BBZ6_CAPCH)
Replicates 1_3	SL4.0ch01	2307485	2307685	38	SL4.0ch01:2307585	-5268	Solyc01g008220.3.1	TCP transcription factor 15 (AHRD V3.11 *** tr|G3BGV5|G3BGV5_SOLLC)
Replicates 1_3	SL4.0ch09	1627251	1627451	38	SL4.0ch09:1627351	-406	Solyc09g008130.3.1	Membrane magnesium transporter (AHRD V3.3 *** A0A1U8EHI1_CAPAN)
Replicates 1_3	SL4.0ch08	1672781	1672981	55	SL4.0ch08:1672881	-5588	Solyc08g007110.4.1	Haloacid dehalogenase-like hydrolase (HAD) superfamily protein (AHRD V3.3 *** A0A2U1KV95_ARTAN)
Replicates 1_3	SL4.0ch04	1137293	1137493	43	SL4.0ch04:1137393	-1980	Solyc04g007430.2.1	bHLH transcription factor 031
Replicates 1_3	SL4.0ch04	59289898	59290098	45	SL4.0ch04:59289998	-8027	Solyc04g076380.4.1	Cysteine--tRNA ligase (AHRD V3.3 *** A0A1J3GNV7_NOCCA)
Replicates 1_3	SL4.0ch05	1038684	1038884	34	SL4.0ch05:1038784	-6819	Solyc05g006330.2.1	Transducin/WD40 repeat-like superfamily protein (AHRD V3.3 *** A0A2U1QGB4_ARTAN)
Replicates 1_3	SL4.0ch06	38288575	38288775	33.3	SL4.0ch06:38288675	-16773	Solyc06g065160.1.1	TCP transcription factor 13
Replicates 1_3	SL4.0ch05	61335945	61336145	31	SL4.0ch05:61336045	-12636	Solyc05g051580.3.1	Mitochondrial substrate carrier family protein (AHRD V3.11 *** tr|A0A1P8BDA7|A0A1P8BDA7_ARATH)
Replicates 1_3	SL4.0ch02	44629610	44629810	47	SL4.0ch02:44629710	-6160	Solyc02g083120.3.1	DUF641 domain-containing protein (AHRD V3.3 *** A0A1Q3C2N9_CEPFO)
Replicates 1_3	SL4.0ch12	62678172	62678372	60	SL4.0ch12:62678272	-4660	Solyc12g056980.1.1	Unknown protein
Replicates 1_3	SL4.0ch08	9396655	9396855	93	SL4.0ch08:9396755	-17520	Solyc08g016792.1.1	Unknown protein
Replicates 1_3	SL4.0ch08	2649763	2649963	29.3	SL4.0ch08:2649863	-6090	Solyc08g008160.4.1	Calcium-dependent protein kinase (AHRD V3.3 *** B2KTA5_WHEAT)
Replicates 1_3	SL4.0ch03	63866694	63866894	39	SL4.0ch03:63866794	-2257	Solyc03g121270.3.1	23S rRNA (Uracil-5-)-methyltransferase rumA (AHRD V3.3 *** A0A2K3PEV5_TRIPR)
Replicates 1_3	SL4.0ch01	87759346	87759546	53	SL4.0ch01:87759446	-7106	Solyc01g108100.3.1	Spire
Replicates 1_3	SL4.0ch02	49847130	49847330	36	SL4.0ch02:49847230	-22540	Solyc02g090130.4.1	Oligopeptidase B (AHRD V3.3 *** A0A2I0V9Y9_9ASPA)
Replicates 1_3	SL4.0ch04	5351156	5351356	46	SL4.0ch04:5351256	-18580	Solyc04g015160.3.1	Phosphoglycolate phosphatase (AHRD V3.3 *** A0A2G3CDP2_CAPCH)
Replicates 1_3	SL4.0ch08	1702558	1702758	46	SL4.0ch08:1702658	-5319	Solyc08g007130.5.1	SBP (S-ribonuclease binding protein) family protein (AHRD V3.3 *** Q8LCK5_ARATH)
Replicates 1_3	SL4.0ch12	63382854	63383054	46	SL4.0ch12:63382954	-9098	Solyc12g088420.2.1	C5orf35 (AHRD V3.3 *** AT5G23200.1)
Replicates 1_3	SL4.0ch01	88906110	88906310	41	SL4.0ch01:88906210	-9141	Solyc01g109670.3.1	meloidogyne-induced giant cell protein DB275
Replicates 1_3	SL4.0ch04	55378723	55378923	38	SL4.0ch04:55378823	-2611	Solyc04g064870.3.1	MADS-box transcription factor 23 (AHRD V3.3 *** A0A2G2Y5S9_CAPAN)
Replicates 1_3	SL4.0ch09	63234402	63234602	52	SL4.0ch09:63234502	-2925	Solyc09g075290.3.1	Exocyst complex component (AHRD V3.3 *** A0A2G2W0K7_CAPBA)
Replicates 1_3	SL4.0ch03	58100603	58100803	25	SL4.0ch03:58100703	-629	Solyc03g113590.3.1	5-formyltetrahydrofolate cycloligase
Replicates 1_3	SL4.0ch03	61611864	61612064	34.1	SL4.0ch03:61611964	-7882	Solyc03g118255.1.1	Magnesium-protoporphyrin IX methyltransferase (AHRD V3.11 *** tr|A0A1P8B4G1|A0A1P8B4G1_ARATH)
Replicates 1_3	SL4.0ch09	2321653	2321853	32	SL4.0ch09:2321753	-12789	Solyc09g098620.2.1	leucine-rich repeat receptor-like protein kinase PXC1 (AHRD V3.11 *** tr|A0A1S4B9J1|A0A1S4B9J1_TOBAC)
Replicates 1_3	SL4.0ch01	1611864	1612064	39.2	SL4.0ch01:1611964	-13463	Solyc01g007050.4.1	BEL1-like homeodomain protein 3 (AHRD V3.3 *** A0A2G3AY56_CAPCH)
Replicates 1_3	SL4.0ch07	65875677	65875877	42	SL4.0ch07:65875777	-1906	Solyc07g063610.5.1	Membrane lipoprotein lipid attachment site-like protein
Replicates 1_3	SL4.0ch05	56536003	56536203	37	SL4.0ch05:56536103	-31	Solyc05g044620.3.1	Unknown protein
Replicates 1_3	SL4.0ch08	437729	437929	27.4	SL4.0ch08:437829	-13831	Solyc08g005580.3.1	Root UVB sensitive family (AHRD V3.11 *** tr|A0A2U1QLM3|A0A2U1QLM3_ARTAN)
Replicates 1_3	SL4.0ch03	1824488	1824688	23.2	SL4.0ch03:1824588	-23120	Solyc03g007190.3.1	Protein phosphatase 2C (AHRD V3.3 *** A0A2U1KYU0_ARTAN)
Replicates 1_3	SL4.0ch02	49007591	49007791	34	SL4.0ch02:49007691	-9274	Solyc02g089065.1.1	Methyl esterase 11 (AHRD V3.3 *** A0A2U1LRP6_ARTAN)
Replicates 1_3	SL4.0ch04	57561355	57561555	34	SL4.0ch04:57561455	-10206	Solyc04g072640.3.1	structural constituent of ribosome (AHRD V3.3 *-* AT1G22110.3)
Replicates 1_3	SL4.0ch05	62045157	62045357	33.5	SL4.0ch05:62045257	-35493	Solyc05g052470.3.1	Abscisic acid receptor PYL6 (AHRD V3.3 *-* A0A1U8GQ86_CAPAN)
Replicates 1_3	SL4.0ch04	61011358	61011558	30.3	SL4.0ch04:61011458	-4919	Solyc04g078240.3.1	metal transporter Nramp2
Replicates 1_3	SL4.0ch01	81060877	81061077	39	SL4.0ch01:81060977	-3499	Solyc01g098230.3.1	transmembrane protein adipocyte-associated 1-like (AHRD V3.3 *** A0A2I4GNC8_9ROSI)
Replicates 1_3	SL4.0ch07	61044602	61044802	39	SL4.0ch07:61044702	-7924	Solyc07g052690.4.1	lysine-rich arabinogalactan protein 19 (AHRD V3.3 *-* XP_010324089.1)
Replicates 1_3	SL4.0ch04	57173347	57173547	41	SL4.0ch04:57173447	-7059	Solyc04g072240.3.1	Protein kinase superfamily protein (AHRD V3.3 *** A0A2U1PVM4_ARTAN)
Replicates 1_3	SL4.0ch12	2573000	2573200	36	SL4.0ch12:2573100	-4095	Solyc12g009230.3.1	Ethylene-responsive transcription factor (AHRD V3.3 *-* A0A2G3BP26_CAPCH)
Replicates 1_3	SL4.0ch02	33568615	33568815	35.4	SL4.0ch02:33568715	-7802	Solyc02g161140.1.1	Glycine-rich domain-containing protein 2 (AHRD V3.3 *** A0A2G3A574_CAPAN)
Replicates 1_3	SL4.0ch10	63165361	63165561	32.7	SL4.0ch10:63165461	-1543	Solyc10g084500.1.1	hypothetical protein (AHRD V3.3 *** AT5G02640.1)
Replicates 1_3	SL4.0ch04	2409233	2409433	40	SL4.0ch04:2409333	-3398	Solyc04g008720.4.1	Arginine/serine-rich-like splicing factor (AHRD V3.3 *-* Q9SII4_ARATH)
Replicates 1_3	SL4.0ch08	2498152	2498352	40	SL4.0ch08:2498252	-8576	Solyc08g007980.3.1	RNA-binding protein NOB1 (AHRD V3.3 *** A0A2K3NS65_TRIPR)
Replicates 1_3	SL4.0ch01	75489382	75489582	35	SL4.0ch01:75489482	-2990	Solyc01g088440.2.1	RING/U-box superfamily protein (AHRD V3.11 *-* tr|A0A2U1KCN8|A0A2U1KCN8_ARTAN)
Replicates 1_3	SL4.0ch02	37097610	37097810	35	SL4.0ch02:37097710	-3891	Solyc02g069130.3.1	zinc finger protein ZPR1-like (AHRD V3.3 *** A0A2I4F7X7_9ROSI)
Replicates 1_3	SL4.0ch07	65827470	65827670	35	SL4.0ch07:65827570	-829	Solyc07g063550.3.1	hypothetical protein (AHRD V3.3 *** AT2G20820.1)
Replicates 1_3	SL4.0ch08	58250045	58250245	35	SL4.0ch08:58250145	-5806	Solyc08g076080.3.1	DUF760 domain-containing protein (AHRD V3.3 *** A0A1Q3CP94_CEPFO)
Replicates 1_3	SL4.0ch09	65942359	65942559	34.1	SL4.0ch09:65942459	-965	Solyc09g090330.3.1	Transducin/WD40 repeat-like superfamily protein (AHRD V3.3 *** AT4G14310.1)
Replicates 1_3	SL4.0ch00	9250729	9250929	57.6	SL4.0ch00:9250829	-3088	Solyc00g500402.1.1	Unknown protein
Replicates 1_3	SL4.0ch04	61896396	61896596	32	SL4.0ch04:61896496	-4195	Solyc04g079400.3.1	Protein OSB1
Replicates 1_3	SL4.0ch12	2328931	2329131	36.8	SL4.0ch12:2329031	-5352	Solyc12g008980.3.1	O-acyltransferase (AHRD V3.3 *** A0A2G2X3X8_CAPBA)
Replicates 1_3	SL4.0ch00	5079313	5079513	115	SL4.0ch00:5079413	-5749	Solyc00g019970.2.1	NADH dehydrogenase subunit 9 (AHRD V3.11 *** tr|A0A290WKX8|A0A290WKX8_SOLLC)
Replicates 1_3	SL4.0ch09	59052851	59053051	29	SL4.0ch09:59052951	-43680	Solyc09g065130.4.1	bHLH transcription factor 150
Replicates 1_3	SL4.0ch11	263919	264119	28.3	SL4.0ch11:264019	-6430	Solyc11g005320.1.1	RING/U-box superfamily protein (AHRD V3.3 *** A0A2U1QK74_ARTAN)
Replicates 1_3	SL4.0ch00	6114065	6114265	65	SL4.0ch00:6114165	-36114	Solyc00g500267.1.1	Unknown protein
Replicates 1_3	SL4.0ch00	6849155	6849355	98	SL4.0ch00:6849255	-13806	Solyc00g500290.2.1	Unknown protein
Replicates 1_3	SL4.0ch10	60432996	60433196	39	SL4.0ch10:60433096	-26091	Solyc10g079870.3.1	Peptide chain release factor 2-like protein (AHRD V3.3 *** A0A2K3N7D8_TRIPR)
Replicates 1_3	SL4.0ch01	90222774	90222974	34	SL4.0ch01:90222874	-12553	Solyc01g111690.3.1	transmembrane protein%2C putative (DUF1279) (AHRD V3.3 *** AT2G20940.2)
Replicates 1_3	SL4.0ch03	45985434	45985634	34	SL4.0ch03:45985534	-768	Solyc03g078780.3.1	UDP-glycosyltransferase 76C4-like (AHRD V3.3 *** A0A2I4EQP1_9ROSI)
Replicates 1_3	SL4.0ch10	61818344	61818544	34	SL4.0ch10:61818444	-4910	Solyc10g081690.1.1	hypothetical protein (AHRD V3.3 *-* AT2G27180.1)
Replicates 1_3	SL4.0ch00	1635429	1635629	102	SL4.0ch00:1635529	-46546	Solyc00g500088.2.1	Unknown protein
Replicates 1_3	SL4.0ch08	9491531	9491731	109	SL4.0ch08:9491631	-10353	Solyc08g016794.1.1	Unknown protein
Replicates 1_3	SL4.0ch03	54186169	54186369	31	SL4.0ch03:54186269	-24019	Solyc03g097310.3.1	DB199
Replicates 1_3	SL4.0ch06	1199588	1199788	31	SL4.0ch06:1199688	-791	Solyc06g007130.5.1.1	omega-3 fatty acid desaturase -3
Replicates 1_3	SL4.0ch03	4470811	4471011	30.1	SL4.0ch03:4470911	-5188	Solyc03g032065.1.1	RING/U-box superfamily protein (AHRD V3.3 *** A0A2U1LI04_ARTAN)
Replicates 1_3	SL4.0ch00	1646441	1646641	68.7	SL4.0ch00:1646541	-57558	Solyc00g500088.2.1	Unknown protein
Replicates 1_3	SL4.0ch07	65558679	65558879	28	SL4.0ch07:65558779	-3851	Solyc07g063190.4.1	Unknown protein
Replicates 1_3	SL4.0ch05	4221406	4221606	27.9	SL4.0ch05:4221506	-6710	Solyc05g009950.3.1	TauD/TfdA-like domain-containing protein (AHRD V3.3 *** A0A2U1PT45_ARTAN)
Replicates 1_3	SL4.0ch06	36521914	36522114	40	SL4.0ch06:36522014	-7641	Solyc06g060810.3.1	Homeobox-leucine zipper protein HAT2 (AHRD V3.3 *** A0A2G2WJU4_CAPBA)
Replicates 1_3	SL4.0ch06	44106058	44106258	40	SL4.0ch06:44106158	-1110	Solyc06g074940.5.1	heavy metal-associated isoprenylated plant protein 3-like (AHRD V3.11 *** tr|A0A1U8H726|A0A1U8H726_CAPAN)
Replicates 1_3	SL4.0ch08	9567938	9568138	79.4	SL4.0ch08:9568038	-1666	Solyc08g150111.1.1	Unknown protein
Replicates 1_3	SL4.0ch01	2338961	2339161	33	SL4.0ch01:2339061	-4893	Solyc01g008290.3.1	Prefoldin subunit 5 (AHRD V3.3 *** B6TVU2_MAIZE)
Replicates 1_3	SL4.0ch07	65621899	65622099	33	SL4.0ch07:65621999	-9231	Solyc07g063300.3.1	Nucleolar GTP-binding protein 2 (AHRD V3.3 *** A0A0H5RA30_9EUKA)
Replicates 1_3	SL4.0ch01	1611605	1611805	32.8	SL4.0ch01:1611705	-13204	Solyc01g007050.4.1	BEL1-like homeodomain protein 3 (AHRD V3.3 *** A0A2G3AY56_CAPCH)
Replicates 1_3	SL4.0ch12	2519086	2519286	44	SL4.0ch12:2519186	-8508	Solyc12g009170.2.1	Inter-alpha-trypsin inhibitor heavy chain-like protein (AHRD V3.3 *** Q8L798_ARATH)
Replicates 1_3	SL4.0ch01	79239680	79239880	23.8	SL4.0ch01:79239780	-15591	Solyc01g095770.3.1	F-box protein (AHRD V3.3 *** A0A2G2XT66_CAPBA)
Replicates 1_3	SL4.0ch02	45972060	45972260	35	SL4.0ch02:45972160	-4974	Solyc02g084890.3.1	P-loop containing nucleoside triphosphate hydrolases superfamily protein (AHRD V3.3 *** A0A2U1NGS8_ARTAN)
Replicates 1_3	SL4.0ch05	4221561	4221761	34.9	SL4.0ch05:4221661	-6865	Solyc05g009950.3.1	Protein decapping 5 (AHRD V3.3 *** A0A2G3B6L4_CAPCH)
Replicates 1_3	SL4.0ch02	45106298	45106498	34.6	SL4.0ch02:45106398	-584	Solyc02g083840.1.1	Chaperone protein DnaJ (AHRD V3.3 *** A0A2G2XG76_CAPBA)
Replicates 1_3	SL4.0ch09	63253105	63253305	30	SL4.0ch09:63253205	-18640	Solyc09g075280.2.1	RING-H2 finger protein ATL5-like (AHRD V3.3 *** A0A2I4EZH4_9ROSI)
Replicates 1_3	SL4.0ch02	33568849	33569049	29.6	SL4.0ch02:33568949	-7568	Solyc02g161140.1.1	Glycine-rich domain-containing protein 2 (AHRD V3.3 *** A0A2G3A574_CAPAN)
Replicates 1_3	SL4.0ch02	33840058	33840258	22	SL4.0ch02:33840158	-8011	Solyc02g064710.3.1	transcriptional regulator of RNA polII%2C SAGA%2C subunit (AHRD V3.3 *** AT4G33890.2)
Replicates 1_3	SL4.0ch08	437874	438074	26.6	SL4.0ch08:437974	-13686	Solyc08g005580.3.1	Root UVB sensitive family (AHRD V3.11 *** tr|A0A2U1QLM3|A0A2U1QLM3_ARTAN)
Replicates 1_3	SL4.0ch06	45126101	45126301	26.4	SL4.0ch06:45126201	-3374	Solyc06g076370.4.1	Protein TOC75
Replicates 1_3	SL4.0ch04	6948648	6948848	37	SL4.0ch04:6948748	-15952	Solyc04g016150.2.1	F-box/LRR-repeat protein At5g63520-like (AHRD V3.3 *** A0A2I4FAV8_9ROSI)
Replicates 1_3	SL4.0ch08	50483945	50484145	37	SL4.0ch08:50484045	-4043	Solyc08g150129.1.1	Heat shock transcription factor (AHRD V3.11 *-* tr|A0A1Y1I763|A0A1Y1I763_KLENI)
Replicates 1_3	SL4.0ch09	66796128	66796328	37	SL4.0ch09:66796228	-1407	Solyc09g091410.2.1	Inosine triphosphate pyrophosphatase (AHRD V3.3 *** A0A2G2W1Y2_CAPBA)
Replicates 1_3	SL4.0ch01	80488111	80488311	36.2	SL4.0ch01:80488211	-6447	Solyc01g097320.3.1	Light-inducible protein CPRF2 (AHRD V3.3 *** A0A2G2W7C8_CAPBA)
Replicates 1_3	SL4.0ch08	9335578	9335778	21.1	SL4.0ch08:9335678	-7816	Solyc08g016790.1.1	Unknown protein
Replicates 1_3	SL4.0ch03	57912137	57912337	32	SL4.0ch03:57912237	-4424	Solyc03g113320.1.1	Nodulin-like / Major Facilitator Superfamily protein (AHRD V3.3 *** A0A2U1M3G7_ARTAN)
Replicates 1_3	SL4.0ch08	56932163	56932363	32	SL4.0ch08:56932263	-5583	Solyc08g074670.3.1	F-box/kelch-repeat protein SKIP25 (AHRD V3.3 *** A0A2G2XM52_CAPBA)
Replicates 1_3	SL4.0ch02	40673712	40673912	32	SL4.0ch02:40673812	-14264	Solyc02g077860.1.1	Ethylene-responsive transcription factor 4 (AHRD V3.3 *-* A0A2G3D5H4_CAPCH)
Replicates 1_3	SL4.0ch01	1368262	1368462	31	SL4.0ch01:1368362	-463	Solyc01g006780.4.1	Unknown protein
Replicates 1_3	SL4.0ch10	51080460	51080660	43	SL4.0ch10:51080560	-57713	Solyc10g051370.3.1	RNA-binding protein (AHRD V3.3 *** O24106_NICGU)
Replicates 1_3	SL4.0ch03	4402329	4402529	34	SL4.0ch03:4402429	-15952	Solyc03g031990.4.1	3-hydroxy-3-methylglutaryl-coenzyme A reductase 3 (AHRD V3.11 *** sp|Q41438|HMDH3_SOLTU)
Replicates 1_3	SL4.0ch09	4147107	4147307	34	SL4.0ch09:4147207	-53	Solyc09g010820.3.1	Myb-related protein 3R-1 (AHRD V3.3 *** A0A2G2VTL7_CAPBA)
Replicates 1_3	SL4.0ch08	60769821	60770021	33.9	SL4.0ch08:60769921	-10021	Solyc08g078990.3.1	C2H2-like zinc finger protein (AHRD V3.3 *-* A0A2U1KP34_ARTAN)
Replicates 1_3	SL4.0ch04	62252803	62253003	33.6	SL4.0ch04:62252903	-5570	Solyc04g079970.3.1	geranylgeranyl pyrophosphate synthase 2
Replicates 1_3	SL4.0ch06	40453344	40453544	29	SL4.0ch06:40453444	-3313	Solyc06g069020.5.1	LeArcA1 protein containing 7 WD40 repeats
Replicates 1_3	SL4.0ch00	7882656	7882856	50	SL4.0ch00:7882756	-90178	Solyc00g500355.1.1	Polyadenylate-binding protein RBP47B (AHRD V3.11 *-* tr|A0A2G3BE08|A0A2G3BE08_CAPCH)
Replicates 1_3	SL4.0ch02	35539479	35539679	25.7	SL4.0ch02:35539579	-33397	Solyc02g067350.3.1	Zinc-finger homeodomain protein 10 (AHRD V3.3 *** A0A2G3D3J7_CAPCH)
Replicates 1_3	SL4.0ch10	61992712	61992912	25	SL4.0ch10:61992812	-6770	Solyc10g081980.2.1	Late embryogenesis abundant (LEA) hydroxyproline-rich glycoprotein family (AHRD V3.11 *** tr|Q9SVC8|Q9SVC8_ARATH)
Replicates 1_3	SL4.0ch05	4221225	4221425	37.2	SL4.0ch05:4221325	-6529	Solyc05g009950.3.1	TauD/TfdA-like domain-containing protein (AHRD V3.3 *** A0A2U1PT45_ARTAN)
Replicates 1_3	SL4.0ch00	2638541	2638741	49	SL4.0ch00:2638641	-58858	Solyc00g500158.1.1	Cytochrome b6-f complex subunit 4 (AHRD V3.3 *** A0A2G2XBM1_CAPBA)
Replicates 1_3	SL4.0ch01	77426871	77427071	42	SL4.0ch01:77426971	-4528	Solyc01g091580.3.1	BON1-associated protein 2-like (AHRD V3.11 *** tr|A0A2I4E3A5|A0A2I4E3A5_9ROSI)
Replicates 1_3	SL4.0ch01	80624579	80624779	31	SL4.0ch01:80624679	-5683	Solyc01g097580.1.1	Protein SUPPRESSOR OF K(+) TRANSPORT GROWTH DEFECT 1 (AHRD V3.3 *-* A0A2G2W7B7_CAPBA)
Replicates 1_3	SL4.0ch02	40556046	40556246	31	SL4.0ch02:40556146	-4192	Solyc02g077670.3.1	Alpha-1
Replicates 1_3	SL4.0ch05	10534170	10534370	31	SL4.0ch05:10534270	-32351	Solyc05g015430.1.1	F-box protein (AHRD V3.11 *** tr|A0A2G2YF26|A0A2G2YF26_CAPAN)
Replicates 1_3	SL4.0ch06	43692479	43692679	33	SL4.0ch06:43692579	-9162	Solyc06g074410.4.1	Proteinaceous RNase P 2 (AHRD V3.3 *** A0A1U8H3H4_CAPAN)
Replicates 1_3	SL4.0ch05	1365468	1365668	32.8	SL4.0ch05:1365568	-6845	Solyc05g006640.4.1	bHLH transcription factor 036
Replicates 1_3	SL4.0ch10	51040285	51040485	32	SL4.0ch10:51040385	-17538	Solyc10g051370.3.1	RNA-binding protein (AHRD V3.3 *-* O24106_NICGU)
Replicates 1_3	SL4.0ch04	61310203	61310403	28	SL4.0ch04:61310303	-3956	Solyc04g078640.3.1	Ethylene-responsive transcription factor RAP2-1 (AHRD V3.3 *** A0A1U8GBU2_CAPAN)
Replicates 1_3	SL4.0ch06	43007465	43007665	27.6	SL4.0ch06:43007565	-22115	Solyc06g073520.3.1	La-related protein 1 (AHRD V3.3 *** A0A2G3CAE9_CAPCH)
Replicates 1_3	SL4.0ch09	2922644	2922844	35	SL4.0ch09:2922744	-3175	Solyc09g009430.3.1	Iron-sulfur assembly protein IscA-like 1
Replicates 1_3	SL4.0ch08	9582707	9582907	34.3	SL4.0ch08:9582807	-11963	Solyc08g016799.1.1	Unknown protein
Replicates 1_3	SL4.0ch12	65687694	65687894	34.1	SL4.0ch12:65687794	-29810	Solyc12g098810.2.1	Unknown protein
Replicates 1_3	SL4.0ch09	56280271	56280471	21	SL4.0ch09:56280371	-6449	Solyc09g061700.3.1	Alba DNA/RNA-binding protein (AHRD V3.3 *-* A0A1I9LSC0_ARATH)
Replicates 1_3	SL4.0ch10	63759312	63759512	20.9	SL4.0ch10:63759412	-2430	Solyc10g085400.3.1	Cactin (AHRD V3.3 *** A0A2G3BFE1_CAPCH)
Replicates 1_3	SL4.0ch08	63818057	63818257	36.6	SL4.0ch08:63818157	-4524	Solyc08g083120.3.1	Methionine gamma-lyase (AHRD V3.3 *** A0A1U8G8Y5_CAPAN)
Replicates 1_3	SL4.0ch04	61796858	61797058	36.2	SL4.0ch04:61796958	-8229	Solyc04g079300.3.1	RNA-binding protein 47C (AHRD V3.3 *** A0A2U1PUZ3_ARTAN)
Replicates 1_3	SL4.0ch05	3087644	3087844	45	SL4.0ch05:3087744	-11192	Solyc05g008820.4.1	lipid phosphate phosphatase 2-like (AHRD V3.3 *** A0A1S4AJT8_TOBAC)
Replicates 1_3	SL4.0ch08	47311278	47311478	41	SL4.0ch08:47311378	-42544	Solyc08g061590.5.1	Copper-transporting ATPase PAA2
Replicates 1_3	SL4.0ch02	49577802	49578002	25	SL4.0ch02:49577902	-8592	Solyc02g089830.2.1	TCP transcription factor 7
Replicates 1_3	SL4.0ch05	7384987	7385187	25	SL4.0ch05:7385087	-261	Solyc05g013880.2.1	Transducin/WD40 repeat-like superfamily protein (AHRD V3.11 *** tr|A0A2U1NTK1|A0A2U1NTK1_ARTAN)
Replicates 1_3	SL4.0ch06	39435906	39436106	25	SL4.0ch06:39436006	-4260	Solyc06g066550.3.1	Ethylene-responsive transcription factor (AHRD V3.3 *-* A0A2G2XMU8_CAPBA)
Replicates 1_3	SL4.0ch08	9428645	9428845	73	SL4.0ch08:9428745	-16058	Solyc08g150109.1.1	Unknown protein
Replicates 1_3	SL4.0ch03	49583791	49583991	32	SL4.0ch03:49583891	-43547	Solyc03g160390.1.1	ethylene response factor A.2
Replicates 1_3	SL4.0ch07	1620712	1620912	32	SL4.0ch07:1620812	-1192	Solyc07g006800.1.1	Adenosylmethionine-8-amino-7-oxononanoate aminotransferase (AHRD V3.3 *** S8C9K2_9LAMI)
Replicates 1_3	SL4.0ch12	63020506	63020706	32	SL4.0ch12:63020606	-7045	Solyc12g087960.2.1	AT-hook motif nuclear-localized protein (AHRD V3.3 *** A0A1U8GD78_CAPAN)
Replicates 1_3	SL4.0ch00	1595809	1596009	47.4	SL4.0ch00:1595909	-6926	Solyc00g500088.2.1	Unknown protein
Replicates 1_3	SL4.0ch00	4705195	4705395	81	SL4.0ch00:4705295	-13179	Solyc00g500233.1.1	Unknown protein
Replicates 1_3	SL4.0ch02	37229897	37230097	27	SL4.0ch02:37229997	-5703	Solyc02g069280.2.1	Argonaute 2b
Replicates 1_3	SL4.0ch05	61864953	61865153	27	SL4.0ch05:61865053	-2210	Solyc05g052200.4.1	Transcription elongation factor TFIIS (AHRD V3.3 *** A0A2G2ZJJ8_CAPAN)
Replicates 1_3	SL4.0ch12	64845459	64845659	26.3	SL4.0ch12:64845559	-1396	Solyc12g096380.1.1	Peptidyl-tRNA hydrolase II (PTH2) family protein (AHRD V3.3 *-* Q9FT62_ARATH)
Replicates 1_3	SL4.0ch08	9477072	9477272	65	SL4.0ch08:9477172	-24812	Solyc08g016794.1.1	Unknown protein
Replicates 1_3	SL4.0ch07	63285804	63286004	43.7	SL4.0ch07:63285904	-12387	Solyc07g055300.3.1	WRKY transcription factor 78
Replicates 1_3	SL4.0ch09	640705	640905	36	SL4.0ch09:640805	-3422	Solyc09g005910.4.1	Lung seven transmembrane receptor family protein (AHRD V3.11 *** tr|A0A2U1P555|A0A2U1P555_ARTAN)
Replicates 1_3	SL4.0ch11	53296004	53296204	42	SL4.0ch11:53296104	-2550	Solyc11g071890.3.1	GTPase LSG1-2 (AHRD V3.3 *** A0A2G3BAP2_CAPCH)
Replicates 1_3	SL4.0ch00	592112	592312	52.7	SL4.0ch00:592212	-35908	Solyc00g500014.1.1	Unknown protein
Replicates 1_3	SL4.0ch01	82906788	82906988	40	SL4.0ch01:82906888	-11993	Solyc01g100670.1.1	NHL repeat-containing protein 2-like (AHRD V3.3 *** A0A2K3NND0_TRIPR)
Replicates 1_3	SL4.0ch06	40922735	40922935	24.1	SL4.0ch06:40922835	-347	Solyc06g069520.4.1	hypothetical protein (AHRD V3.3 *** AT5G07950.1)
Replicates 1_3	SL4.0ch04	61967652	61967852	24	SL4.0ch04:61967752	-13244	Solyc04g079590.3.1	Dof zinc finger protein (AHRD V3.3 *-* A0A2K3NXA1_TRIPR)
Replicates 1_3	SL4.0ch05	59176440	59176640	24	SL4.0ch05:59176540	-21462	Solyc05g049970.3.1	Small nuclear ribonucleoprotein-associated protein (AHRD V3.3 *-* A0A2G2YXL6_CAPAN)
Replicates 1_3	SL4.0ch12	63789306	63789506	24	SL4.0ch12:63789406	-5020	Solyc12g089090.2.1	Outer envelope pore protein 24A
Replicates 1_3	SL4.0ch06	38288777	38288977	23.7	SL4.0ch06:38288877	-16975	Solyc06g065160.1.1	TCP transcription factor 13
Replicates 1_3	SL4.0ch00	1624587	1624787	65.5	SL4.0ch00:1624687	-35704	Solyc00g500088.2.1	Unknown protein
Replicates 1_3	SL4.0ch03	3702563	3702763	29	SL4.0ch03:3702663	-2643	Solyc03g124110.2.1	C-repeat binding factor 1
Replicates 1_3	SL4.0ch03	4089135	4089335	29	SL4.0ch03:4089235	-10646	Solyc03g031700.5.1	RNA-binding protein (AHRD V3.3 *** A0A2K3PBB6_TRIPR)
Replicates 1_3	SL4.0ch03	5087237	5087437	29	SL4.0ch03:5087337	-9428	Solyc03g033640.3.1	Zinc finger CCCH domain-containing protein 44 (AHRD V3.3 *** A0A2G3CKZ0_CAPCH)
Replicates 1_3	SL4.0ch08	60160535	60160735	29	SL4.0ch08:60160635	-9288	Solyc08g078230.4.1	PPPDE putative thiol peptidase family protein (AHRD V3.3 *** A0A2U1KMT1_ARTAN)
Replicates 1_3	SL4.0ch08	60441976	60442176	20.7	SL4.0ch08:60442076	-12659	Solyc08g078550.1.1	O-fucosyltransferase (AHRD V3.3 *** A0A2P5AVU2_PARAD)
Replicates 1_3	SL4.0ch08	60105973	60106173	20.3	SL4.0ch08:60106073	-11871	Solyc08g078160.3.1	Ethylene-responsive transcription factor 2 (AHRD V3.3 *** A0A2G3DC56_CAPCH)
Replicates 1_3	SL4.0ch00	2879884	2880084	61	SL4.0ch00:2879984	-47647	Solyc00g160360.1.1	Unknown protein
Replicates 1_3	SL4.0ch01	86336378	86336578	31	SL4.0ch01:86336478	-7573	Solyc01g106040.3.1	GATA transcription factor 28 (AHRD V3.3 *** A0A2G3AWS2_CAPCH)
Replicates 1_3	SL4.0ch02	51520504	51520704	31	SL4.0ch02:51520604	-6263	Solyc02g092430.1.1	Phototropic-responsive NPH3 family protein (AHRD V3.3 *-* A0A2U1NGE5_ARTAN)
[truncated: 9,773 more rows]

## Sheet: Total Peaks on Promoters
# Replicates	Chr	Start	End	Position	Score	Closest_TSS	Gene ID	Description
Replicates 1_1	SL4.0ch10	63759164	63759364	SL4.0ch10:63759264	26.4	-1	Solyc10g085410.3.1	Cactin (AHRD V3.3 *** A0A2G3BFE1_CAPCH)
Replicates 1_2	SL4.0ch04	57007027	57007227	SL4.0ch04:57007127	32.5	-1	Solyc04g072043.1.1	Polyadenylate-binding protein (AHRD V3.3 *** A0A2G3CN64_CAPCH)
Replicates 3_1	SL4.0ch10	63759164	63759364	SL4.0ch10:63759264	46.8	-1	Solyc10g085410.3.1	Cactin (AHRD V3.3 *** A0A2G3BFE1_CAPCH)
Replicates 3_1	SL4.0ch12	176484	176684	SL4.0ch12:176584	29	-1	Solyc12g005260.1.1	Kinesin-like protein (AHRD V3.3 *-* A0A2G2X2E7_CAPBA)
Replicates 1_2	SL4.0ch11	2608413	2608613	SL4.0ch11:2608513	35	-2	Solyc11g008360.3.1	Pseudouridine synthase family protein (AHRD V3.3 *** A0A1P8AXV3_ARATH)
Replicates 1_2	SL4.0ch03	62923212	62923412	SL4.0ch03:62923312	22	-2	Solyc03g119950.1.1	Pentatricopeptide repeat-containing protein
Replicates 1_2	SL4.0ch07	66338363	66338563	SL4.0ch07:66338463	18	-2	Solyc07g064300.3.1	hypothetical protein (AHRD V3.3 *-* AT1G50910.1)
Replicates 1_3	SL4.0ch10	63759163	63759363	SL4.0ch10:63759263	28.1	-2	Solyc10g085410.3.1	Cactin (AHRD V3.3 *** A0A2G3BFE1_CAPCH)
Replicates 1_3	SL4.0ch04	62143270	62143470	SL4.0ch04:62143370	22	-2	Solyc04g079850.2.1	Pentatricopeptide repeat (AHRD V3.3 *** A0A200Q2A9_9MAGN)
Replicates 1_3	SL4.0ch06	45479667	45479867	SL4.0ch06:45479767	25	-2	Solyc06g076930.2.1	ABC transporter-like (AHRD V3.3 *** A0A200PWT6_9MAGN)
Replicates 2_1	SL4.0ch12	66201473	66201673	SL4.0ch12:66201573	32	-2	Solyc12g099560.2.1	Arginine methyltransferase (AHRD V3.3 *** A0A1Y1HZY4_KLENI)
Replicates 1_1	SL4.0ch12	66201474	66201674	SL4.0ch12:66201574	23.4	-3	Solyc12g099560.2.1	Arginine methyltransferase (AHRD V3.3 *** A0A1Y1HZY4_KLENI)
Replicates 1_1	SL4.0ch07	66338362	66338562	SL4.0ch07:66338462	18	-3	Solyc07g064300.3.1	hypothetical protein (AHRD V3.3 *-* AT1G50910.1)
Replicates 2_1	SL4.0ch09	63234468	63234668	SL4.0ch09:63234568	44.7	-3	Solyc09g075280.2.1	Exocyst complex component (AHRD V3.3 *** A0A2G2W0K7_CAPBA)
Replicates 2_1	SL4.0ch07	1640532	1640732	SL4.0ch07:1640632	27	-3	Solyc07g006820.4.1	Transcription initiation factor TFIID subunit 1 (AHRD V3.3 *** A0A2G2WAA9_CAPBA)
Replicates 2_2	SL4.0ch12	66201474	66201674	SL4.0ch12:66201574	32	-3	Solyc12g099560.2.1	Arginine methyltransferase (AHRD V3.3 *** A0A1Y1HZY4_KLENI)
Replicates 3_1	SL4.0ch12	66201474	66201674	SL4.0ch12:66201574	36	-3	Solyc12g099560.2.1	Arginine methyltransferase (AHRD V3.3 *** A0A1Y1HZY4_KLENI)
Replicates 3_1	SL4.0ch06	40147731	40147931	SL4.0ch06:40147831	19	-3	Solyc06g068590.4.1	Serine/threonine-protein kinase fray2 (AHRD V3.3 *** A0A2G2ZC59_CAPAN)
Replicates 3_1	SL4.0ch05	710957	711157	SL4.0ch05:711057	21	-3	Solyc05g005860.3.1	WAT1-related protein (AHRD V3.3 *** K4BWB3_SOLLC)
Replicates 3_2	SL4.0ch07	66338362	66338562	SL4.0ch07:66338462	34	-3	Solyc07g064300.3.1	hypothetical protein (AHRD V3.3 *-* AT1G50910.1)
Replicates 1_2	SL4.0ch06	45479665	45479865	SL4.0ch06:45479765	25	-4	Solyc06g076930.2.1	ABC transporter-like (AHRD V3.3 *** A0A200PWT6_9MAGN)
Replicates 3_3	SL4.0ch05	2178597	2178797	SL4.0ch05:2178697	32	-4	Solyc05g007590.5.1	Aminotransferase
Replicates 1_3	SL4.0ch11	53307157	53307357	SL4.0ch11:53307257	26	-5	Solyc11g071920.3.1	Serine/threonine-protein phosphatase (AHRD V3.3 *** A0A2G2VPQ2_CAPBA)
Replicates 2_1	SL4.0ch09	64075733	64075933	SL4.0ch09:64075833	28.3	-6	Solyc09g082150.1.1	Heat shock protein (AHRD V3.3 *** Q8VY73_ARATH)
Replicates 2_3	SL4.0ch09	64075733	64075933	SL4.0ch09:64075833	28.3	-6	Solyc09g082150.1.1	Heat shock protein (AHRD V3.3 *** Q8VY73_ARATH)
Replicates 3_1	SL4.0ch07	66338359	66338559	SL4.0ch07:66338459	34	-6	Solyc07g064300.3.1	hypothetical protein (AHRD V3.3 *-* AT1G50910.1)
Replicates 3_2	SL4.0ch07	66556235	66556435	SL4.0ch07:66556335	33	-6	Solyc07g064690.1.1	50S ribosomal protein L34 (AHRD V3.3 *** AT1G29040.1)
Replicates 3_3	SL4.0ch10	63759159	63759359	SL4.0ch10:63759259	47.3	-6	Solyc10g085410.3.1	Cactin (AHRD V3.3 *** A0A2G3BFE1_CAPCH)
Replicates 1_2	SL4.0ch12	66201478	66201678	SL4.0ch12:66201578	24	-7	Solyc12g099560.2.1	Arginine methyltransferase (AHRD V3.3 *** A0A1Y1HZY4_KLENI)
Replicates 2_2	SL4.0ch12	176490	176690	SL4.0ch12:176590	42	-7	Solyc12g005260.1.1	Kinesin-like protein (AHRD V3.3 *-* A0A2G2X2E7_CAPBA)
Replicates 2_2	SL4.0ch12	62862880	62863080	SL4.0ch12:62862980	27	-7	Solyc12g087790.1.1	Unknown protein
Replicates 2_1	SL4.0ch12	176491	176691	SL4.0ch12:176591	42	-8	Solyc12g005260.1.1	Kinesin-like protein (AHRD V3.3 *-* A0A2G2X2E7_CAPBA)
Replicates 2_3	SL4.0ch12	176491	176691	SL4.0ch12:176591	42	-8	Solyc12g005260.1.1	Kinesin-like protein (AHRD V3.3 *-* A0A2G2X2E7_CAPBA)
Replicates 2_3	SL4.0ch01	82249034	82249234	SL4.0ch01:82249134	32	-8	Solyc01g099840.3.1	Dormancy/auxin associated protein (AHRD V3.3 *** A0A2K3MXX9_TRIPR)
Replicates 2_2	SL4.0ch07	66338356	66338556	SL4.0ch07:66338456	26	-9	Solyc07g064300.3.1	hypothetical protein (AHRD V3.3 *-* AT1G50910.1)
Replicates 3_2	SL4.0ch06	40147725	40147925	SL4.0ch06:40147825	19	-9	Solyc06g068590.4.1	Serine/threonine-protein kinase fray2 (AHRD V3.3 *** A0A2G2ZC59_CAPAN)
Replicates 2_1	SL4.0ch09	65180749	65180949	SL4.0ch09:65180849	41	-10	Solyc09g083420.3.1	CWF19-like protein 2 (AHRD V3.3 *** A0A1J3GT59_NOCCA)
Replicates 2_1	SL4.0ch07	66338355	66338555	SL4.0ch07:66338455	26	-10	Solyc07g064300.3.1	hypothetical protein (AHRD V3.3 *-* AT1G50910.1)
Replicates 2_3	SL4.0ch07	66338355	66338555	SL4.0ch07:66338455	26	-10	Solyc07g064300.3.1	hypothetical protein (AHRD V3.3 *-* AT1G50910.1)
Replicates 3_2	SL4.0ch12	176493	176693	SL4.0ch12:176593	29	-10	Solyc12g005260.1.1	Kinesin-like protein (AHRD V3.3 *-* A0A2G2X2E7_CAPBA)
Replicates 3_3	SL4.0ch02	36693160	36693360	SL4.0ch02:36693260	39	-10	Solyc02g068750.1.1	tRNA N6-adenosine threonylcarbamoyltransferase (AHRD V3.3 *** A0A2H5UB77_RHIID)
Replicates 2_1	SL4.0ch07	66556230	66556430	SL4.0ch07:66556330	35	-11	Solyc07g064690.1.1	50S ribosomal protein L34 (AHRD V3.3 *** AT1G29040.1)
Replicates 2_3	SL4.0ch07	66556230	66556430	SL4.0ch07:66556330	35	-11	Solyc07g064690.1.1	50S ribosomal protein L34 (AHRD V3.3 *** AT1G29040.1)
Replicates 3_3	SL4.0ch07	66338354	66338554	SL4.0ch07:66338454	34	-11	Solyc07g064300.3.1	hypothetical protein (AHRD V3.3 *-* AT1G50910.1)
Replicates 2_2	SL4.0ch05	8312897	8313097	SL4.0ch05:8312997	28	-12	Solyc05g014400.4.1	RecQ-mediated genome instability protein 1 (AHRD V3.3 *** A0A2G3BMT0_CAPCH)
Replicates 2_2	SL4.0ch07	66556229	66556429	SL4.0ch07:66556329	35	-12	Solyc07g064690.1.1	50S ribosomal protein L34 (AHRD V3.3 *** AT1G29040.1)
Replicates 2_3	SL4.0ch01	80096243	80096443	SL4.0ch01:80096343	32	-12	Solyc01g096830.3.1	Cation-transporting ATPase (AHRD V3.3 *** A0A2G3BTP9_CAPCH)
Replicates 3_1	SL4.0ch07	66556229	66556429	SL4.0ch07:66556329	33	-12	Solyc07g064690.1.1	50S ribosomal protein L34 (AHRD V3.3 *** AT1G29040.1)
Replicates 3_1	SL4.0ch09	2886409	2886609	SL4.0ch09:2886509	23	-12	Solyc09g009410.3.1	Transducin/WD40 repeat-like superfamily protein (AHRD V3.3 *** A0A1P8B6P4_ARATH)
Replicates 3_1	SL4.0ch02	36693158	36693358	SL4.0ch02:36693258	30.5	-12	Solyc02g068750.1.1	tRNA N6-adenosine threonylcarbamoyltransferase (AHRD V3.3 *** A0A2H5UB77_RHIID)
Replicates 3_2	SL4.0ch02	36693158	36693358	SL4.0ch02:36693258	39	-12	Solyc02g068750.1.1	tRNA N6-adenosine threonylcarbamoyltransferase (AHRD V3.3 *** A0A2H5UB77_RHIID)
Replicates 2_2	SL4.0ch01	80096244	80096444	SL4.0ch01:80096344	32	-13	Solyc01g096830.3.1	Cation-transporting ATPase (AHRD V3.3 *** A0A2G3BTP9_CAPCH)
Replicates 2_2	SL4.0ch06	41848608	41848808	SL4.0ch06:41848708	31	-14	Solyc06g071720.1.1	60S ribosomal protein L27a (AHRD V3.3 *** A0A1U8H4G8_CAPAN)
Replicates 3_3	SL4.0ch09	2886407	2886607	SL4.0ch09:2886507	23	-14	Solyc09g009410.3.1	Transducin/WD40 repeat-like superfamily protein (AHRD V3.3 *** A0A1P8B6P4_ARATH)
Replicates 2_1	SL4.0ch06	41848609	41848809	SL4.0ch06:41848709	31	-15	Solyc06g071720.1.1	60S ribosomal protein L27a (AHRD V3.3 *** A0A1U8H4G8_CAPAN)
Replicates 3_2	SL4.0ch09	2886406	2886606	SL4.0ch09:2886506	23	-15	Solyc09g009410.3.1	Transducin/WD40 repeat-like superfamily protein (AHRD V3.3 *** A0A1P8B6P4_ARATH)
Replicates 1_1	SL4.0ch02	50948701	50948901	SL4.0ch02:50948801	22.2	-16	Solyc02g091670.1.1	Octicosapeptide/Phox/Bem1p family protein (AHRD V3.3 *-* A0A1P8BCE3_ARATH)
Replicates 1_3	SL4.0ch11	51822807	51823007	SL4.0ch11:51822907	19.8	-16	Solyc11g069160.3.1	SUMO E3 ligase SIZ1 (AHRD V3.3 *** A0A0X9AQ43_SOLLC)
Replicates 3_3	SL4.0ch02	50948702	50948902	SL4.0ch02:50948802	27	-17	Solyc02g091670.1.1	Octicosapeptide/Phox/Bem1p family protein (AHRD V3.3 *-* A0A1P8BCE3_ARATH)
Replicates 2_1	SL4.0ch11	6681842	6682042	SL4.0ch11:6681942	43	-18	Solyc11g013530.4.1	PHD finger family protein (AHRD V3.11 *** tr|A0A1P8APU9|A0A1P8APU9_ARATH)
Replicates 2_3	SL4.0ch11	6681842	6682042	SL4.0ch11:6681942	43	-18	Solyc11g013530.4.1	PHD finger family protein (AHRD V3.11 *** tr|A0A1P8APU9|A0A1P8APU9_ARATH)
Replicates 3_2	SL4.0ch01	88075588	88075788	SL4.0ch01:88075688	21.3	-18	Solyc01g108420.2.1	Unknown protein
Replicates 2_2	SL4.0ch11	6681841	6682041	SL4.0ch11:6681941	43	-19	Solyc11g013530.4.1	PHD finger family protein (AHRD V3.11 *** tr|A0A1P8APU9|A0A1P8APU9_ARATH)
Replicates 3_1	SL4.0ch02	50948704	50948904	SL4.0ch02:50948804	27	-19	Solyc02g091670.1.1	Octicosapeptide/Phox/Bem1p family protein (AHRD V3.3 *-* A0A1P8BCE3_ARATH)
Replicates 2_2	SL4.0ch11	51822802	51823002	SL4.0ch11:51822902	28	-21	Solyc11g069160.3.1	SUMO E3 ligase SIZ1 (AHRD V3.3 *** A0A0X9AQ43_SOLLC)
Replicates 2_3	SL4.0ch11	51822801	51823001	SL4.0ch11:51822901	28	-22	Solyc11g069160.3.1	SUMO E3 ligase SIZ1 (AHRD V3.3 *** A0A0X9AQ43_SOLLC)
Replicates 1_3	SL4.0ch09	65595826	65596026	SL4.0ch09:65595926	22	-23	Solyc09g089870.3.1	bHLH transcription factor 061
Replicates 2_3	SL4.0ch08	43911455	43911655	SL4.0ch08:43911555	35	-23	Solyc08g060940.1.1	Nucleotide-sugar transporter family protein (AHRD V3.3 *** A0A2U1NGQ1_ARTAN)
Replicates 3_1	SL4.0ch01	88075582	88075782	SL4.0ch01:88075682	25.9	-24	Solyc01g108420.2.1	Unknown protein
Replicates 2_3	SL4.0ch05	56536009	56536209	SL4.0ch05:56536109	36.1	-25	Solyc05g044620.3.1	Unknown protein
Replicates 3_2	SL4.0ch08	43911457	43911657	SL4.0ch08:43911557	20	-25	Solyc08g060940.1.1	Nucleotide-sugar transporter family protein (AHRD V3.3 *** A0A2U1NGQ1_ARTAN)
Replicates 3_1	SL4.0ch08	60908658	60908858	SL4.0ch08:60908758	23	-26	Solyc08g079160.3.1	Vacuolar-processing enzyme (AHRD V3.3 *** A0A2G2XLA7_CAPBA)
Replicates 3_3	SL4.0ch05	56536007	56536207	SL4.0ch05:56536107	29.2	-27	Solyc05g044620.3.1	Unknown protein
Replicates 3_2	SL4.0ch01	87758926	87759126	SL4.0ch01:87759026	20.3	-28	Solyc01g108090.2.1	Spire
Replicates 2_2	SL4.0ch05	56536005	56536205	SL4.0ch05:56536105	39.5	-29	Solyc05g044620.3.1	Unknown protein
Replicates 1_2	SL4.0ch07	65543592	65543792	SL4.0ch07:65543692	26	-30	Solyc07g063140.1.1	Glutamyl-tRNA(Gln) amidotransferase subunit C
Replicates 2_2	SL4.0ch01	82249012	82249212	SL4.0ch01:82249112	29.7	-30	Solyc01g099840.3.1	Dormancy/auxin associated protein (AHRD V3.3 *** A0A2K3MXX9_TRIPR)
Replicates 1_3	SL4.0ch05	56536003	56536203	SL4.0ch05:56536103	37	-31	Solyc05g044620.3.1	Unknown protein
Replicates 2_1	SL4.0ch10	611337	611537	SL4.0ch10:611437	55	-31	Solyc10g005930.2.1	Histidine biosynthesis bifunctional protein hisIE (AHRD V3.3 *** B6TR63_MAIZE)
Replicates 2_2	SL4.0ch08	43911463	43911663	SL4.0ch08:43911563	33	-31	Solyc08g060940.1.1	Nucleotide-sugar transporter family protein (AHRD V3.3 *** A0A2U1NGQ1_ARTAN)
Replicates 2_3	SL4.0ch10	611337	611537	SL4.0ch10:611437	55	-31	Solyc10g005930.2.1	Histidine biosynthesis bifunctional protein hisIE (AHRD V3.3 *** B6TR63_MAIZE)
Replicates 3_3	SL4.0ch12	176514	176714	SL4.0ch12:176614	26.3	-31	Solyc12g005260.1.1	Kinesin-like protein (AHRD V3.3 *-* A0A2G2X2E7_CAPBA)
Replicates 1_3	SL4.0ch07	65543590	65543790	SL4.0ch07:65543690	26	-32	Solyc07g063140.1.1	Glutamyl-tRNA(Gln) amidotransferase subunit C
Replicates 3_2	SL4.0ch08	60908664	60908864	SL4.0ch08:60908764	23	-32	Solyc08g079160.3.1	Vacuolar-processing enzyme (AHRD V3.3 *** A0A2G2XLA7_CAPBA)
Replicates 1_2	SL4.0ch05	56536001	56536201	SL4.0ch05:56536101	37	-33	Solyc05g044620.3.1	Unknown protein
Replicates 2_3	SL4.0ch04	26607887	26608087	SL4.0ch04:26607987	39.3	-33	Solyc04g024960.1.1	Unknown protein
Replicates 2_2	SL4.0ch07	65543588	65543788	SL4.0ch07:65543688	31	-34	Solyc07g063140.1.1	Glutamyl-tRNA(Gln) amidotransferase subunit C
Replicates 2_1	SL4.0ch07	65543587	65543787	SL4.0ch07:65543687	31	-35	Solyc07g063140.1.1	Glutamyl-tRNA(Gln) amidotransferase subunit C
Replicates 2_1	SL4.0ch08	43911467	43911667	SL4.0ch08:43911567	34	-35	Solyc08g060940.1.1	Nucleotide-sugar transporter family protein (AHRD V3.3 *** A0A2U1NGQ1_ARTAN)
Replicates 1_2	SL4.0ch05	2256852	2257052	SL4.0ch05:2256952	53	-37	Solyc05g007740.3.1	Pentatricopeptide repeat-containing protein (AHRD V3.3 *** A0A2G3B7P9_CAPCH)
Replicates 2_2	SL4.0ch02	42046473	42046673	SL4.0ch02:42046573	29.9	-37	Solyc02g079530.4.1	G-type lectin S-receptor-like serine/threonine-protein kinase (AHRD V3.3 *** A0A2G2VAF6_CAPBA)
Replicates 3_1	SL4.0ch05	2256851	2257051	SL4.0ch05:2256951	57	-38	Solyc05g007740.3.1	Pentatricopeptide repeat-containing protein (AHRD V3.3 *** A0A2G3B7P9_CAPCH)
Replicates 3_1	SL4.0ch01	87758916	87759116	SL4.0ch01:87759016	20.7	-38	Solyc01g108090.2.1	Spire
Replicates 2_2	SL4.0ch00	497801	498001	SL4.0ch00:497901	198	-40	Solyc00g500007.1.1	Unknown protein
Replicates 1_1	SL4.0ch05	2256848	2257048	SL4.0ch05:2256948	54	-41	Solyc05g007740.3.1	Pentatricopeptide repeat-containing protein (AHRD V3.3 *** A0A2G3B7P9_CAPCH)
Replicates 3_2	SL4.0ch02	47552635	47552835	SL4.0ch02:47552735	28.9	-41	Solyc02g086970.4.1	Aldehyde dehydrogenase (AHRD V3.3 *** A0A2U1MUY7_ARTAN)
Replicates 3_3	SL4.0ch02	47552636	47552836	SL4.0ch02:47552736	30	-42	Solyc02g086970.4.1	Aldehyde dehydrogenase (AHRD V3.3 *** A0A2U1MUY7_ARTAN)
Replicates 2_2	SL4.0ch01	83158787	83158987	SL4.0ch01:83158887	31	-43	Solyc01g101010.4.1	RNA polymerase II subunit B1 CTD phosphatase RPAP2-like protein (AHRD V3.3 *-* AT5G26760.2)
Replicates 3_3	SL4.0ch05	2256846	2257046	SL4.0ch05:2256946	57	-43	Solyc05g007740.3.1	Pentatricopeptide repeat-containing protein (AHRD V3.3 *** A0A2G3B7P9_CAPCH)
Replicates 2_3	SL4.0ch01	83158788	83158988	SL4.0ch01:83158888	31	-44	Solyc01g101010.4.1	RNA polymerase II subunit B1 CTD phosphatase RPAP2-like protein (AHRD V3.3 *-* AT5G26760.2)
Replicates 3_2	SL4.0ch05	2256845	2257045	SL4.0ch05:2256945	58	-44	Solyc05g007740.3.1	Pentatricopeptide repeat-containing protein (AHRD V3.3 *** A0A2G3B7P9_CAPCH)
Replicates 1_1	SL4.0ch03	62923255	62923455	SL4.0ch03:62923355	23	-45	Solyc03g119950.1.1	Pentatricopeptide repeat-containing protein
Replicates 2_1	SL4.0ch11	52005394	52005594	SL4.0ch11:52005494	32	-45	Solyc11g069340.2.1	Zinc finger transcription factor 69
Replicates 3_1	SL4.0ch02	47552641	47552841	SL4.0ch02:47552741	31	-47	Solyc02g086970.4.1	Aldehyde dehydrogenase (AHRD V3.3 *** A0A2U1MUY7_ARTAN)
Replicates 1_3	SL4.0ch05	2256839	2257039	SL4.0ch05:2256939	54	-50	Solyc05g007740.3.1	Pentatricopeptide repeat-containing protein (AHRD V3.3 *** A0A2G3B7P9_CAPCH)
Replicates 2_1	SL4.0ch05	2256839	2257039	SL4.0ch05:2256939	42	-50	Solyc05g007740.3.1	Pentatricopeptide repeat-containing protein (AHRD V3.3 *** A0A2G3B7P9_CAPCH)
Replicates 1_2	SL4.0ch09	4147109	4147309	SL4.0ch09:4147209	34	-51	Solyc09g010820.3.1	Myb-related protein 3R-1 (AHRD V3.3 *** A0A2G2VTL7_CAPBA)
Replicates 2_2	SL4.0ch04	3349005	3349205	SL4.0ch04:3349105	36	-51	Solyc04g010000.4.1	RNA-binding protein 42 (AHRD V3.11 *** tr|A0A2I4E3H6|A0A2I4E3H6_9ROSI)
Replicates 2_2	SL4.0ch05	2256837	2257037	SL4.0ch05:2256937	42	-52	Solyc05g007740.3.1	Pentatricopeptide repeat-containing protein (AHRD V3.3 *** A0A2G3B7P9_CAPCH)
Replicates 2_3	SL4.0ch04	3349004	3349204	SL4.0ch04:3349104	36	-52	Solyc04g010000.4.1	RNA-binding protein 42 (AHRD V3.11 *** tr|A0A2I4E3H6|A0A2I4E3H6_9ROSI)
Replicates 3_1	SL4.0ch09	4147108	4147308	SL4.0ch09:4147208	30	-52	Solyc09g010820.3.1	Myb-related protein 3R-1 (AHRD V3.3 *** A0A2G2VTL7_CAPBA)
Replicates 1_3	SL4.0ch09	4147107	4147307	SL4.0ch09:4147207	34	-53	Solyc09g010820.3.1	Myb-related protein 3R-1 (AHRD V3.3 *** A0A2G2VTL7_CAPBA)
Replicates 2_3	SL4.0ch05	2256836	2257036	SL4.0ch05:2256936	42	-53	Solyc05g007740.3.1	Pentatricopeptide repeat-containing protein (AHRD V3.3 *** A0A2G3B7P9_CAPCH)
Replicates 1_1	SL4.0ch09	4147105	4147305	SL4.0ch09:4147205	34	-55	Solyc09g010820.3.1	Myb-related protein 3R-1 (AHRD V3.3 *** A0A2G2VTL7_CAPBA)
Replicates 2_3	SL4.0ch09	4147104	4147304	SL4.0ch09:4147204	36	-56	Solyc09g010820.3.1	Myb-related protein 3R-1 (AHRD V3.3 *** A0A2G2VTL7_CAPBA)
Replicates 1_1	SL4.0ch07	65543565	65543765	SL4.0ch07:65543665	27	-57	Solyc07g063140.1.1	Glutamyl-tRNA(Gln) amidotransferase subunit C
Replicates 3_3	SL4.0ch09	4147103	4147303	SL4.0ch09:4147203	26.1	-57	Solyc09g010820.3.1	Myb-related protein 3R-1 (AHRD V3.3 *** A0A2G2VTL7_CAPBA)
Replicates 3_3	SL4.0ch05	58175821	58176021	SL4.0ch05:58175921	24	-63	Solyc05g047390.1.1	Mitochondrial import receptor subunit TOM7-1 (AHRD V3.3 *** A0A1U8HGG2_CAPAN)
Replicates 1_2	SL4.0ch05	2178657	2178857	SL4.0ch05:2178757	48.7	-64	Solyc05g007590.5.1	Aminotransferase
Replicates 2_1	SL4.0ch08	52288808	52289008	SL4.0ch08:52288908	35	-65	Solyc08g065850.1.1	Unknown protein
Replicates 3_1	SL4.0ch05	2178658	2178858	SL4.0ch05:2178758	61.2	-65	Solyc05g007590.5.1	Aminotransferase
Replicates 3_2	SL4.0ch11	53307097	53307297	SL4.0ch11:53307197	32	-65	Solyc11g071920.3.1	Serine/threonine-protein phosphatase (AHRD V3.3 *** A0A2G2VPQ2_CAPBA)
Replicates 2_2	SL4.0ch00	9372164	9372364	SL4.0ch00:9372264	45.6	-66	Solyc00g500404.1.1	Unknown protein
Replicates 2_2	SL4.0ch05	2178661	2178861	SL4.0ch05:2178761	42	-68	Solyc05g007590.5.1	Aminotransferase
Replicates 3_2	SL4.0ch05	2178661	2178861	SL4.0ch05:2178761	61.1	-68	Solyc05g007590.5.1	Aminotransferase
Replicates 2_1	SL4.0ch05	2178662	2178862	SL4.0ch05:2178762	42.1	-69	Solyc05g007590.5.1	Aminotransferase
Replicates 2_3	SL4.0ch05	2178662	2178862	SL4.0ch05:2178762	52	-69	Solyc05g007590.5.1	Aminotransferase
Replicates 3_1	SL4.0ch03	60175565	60175765	SL4.0ch03:60175665	46	-69	Solyc03g116220.1.1	Unknown protein
Replicates 1_3	SL4.0ch02	41387708	41387908	SL4.0ch02:41387808	39	-70	Solyc02g078760.1.1	hypothetical protein (AHRD V3.3 *** AT1G11125.1)
Replicates 3_3	SL4.0ch02	41387709	41387909	SL4.0ch02:41387809	51	-71	Solyc02g078760.1.1	hypothetical protein (AHRD V3.3 *** AT1G11125.1)
Replicates 1_1	SL4.0ch02	41387710	41387910	SL4.0ch02:41387810	26.2	-72	Solyc02g078760.1.1	hypothetical protein (AHRD V3.3 *** AT1G11125.1)
Replicates 3_2	SL4.0ch02	41387710	41387910	SL4.0ch02:41387810	51	-72	Solyc02g078760.1.1	hypothetical protein (AHRD V3.3 *** AT1G11125.1)
Replicates 2_2	SL4.0ch04	59551269	59551469	SL4.0ch04:59551369	35	-74	Solyc04g076660.3.1	Rhamnogalacturonate lyase family protein (AHRD V3.3 *** A0A2U1NT41_ARTAN)
Replicates 1_2	SL4.0ch11	5019297	5019497	SL4.0ch11:5019397	21	-81	Solyc11g012020.2.1	EH domain-containing protein 1 (AHRD V3.3 *** A0A1U8EYQ8_CAPAN)
Replicates 1_3	SL4.0ch08	57971467	57971667	SL4.0ch08:57971567	18	-84	Solyc08g075730.3.1	Fe-S cluster assembly protein DRE2 (AHRD V3.3 *** A0A2G2XLV2_CAPBA)
Replicates 3_1	SL4.0ch02	41387725	41387925	SL4.0ch02:41387825	49	-87	Solyc02g078760.1.1	hypothetical protein (AHRD V3.3 *** AT1G11125.1)
Replicates 2_2	SL4.0ch01	75794015	75794215	SL4.0ch01:75794115	28.4	-88	Solyc01g088820.2.1	trihelix transcription factor ASIL2-like (AHRD V3.3 *** A0A2I4HF85_9ROSI)
Replicates 3_3	SL4.0ch09	65595891	65596091	SL4.0ch09:65595991	30	-88	Solyc09g089870.3.1	bHLH transcription factor 061
Replicates 1_2	SL4.0ch02	41387727	41387927	SL4.0ch02:41387827	37	-89	Solyc02g078760.1.1	hypothetical protein (AHRD V3.3 *** AT1G11125.1)
Replicates 3_1	SL4.0ch08	9515546	9515746	SL4.0ch08:9515646	166.2	-90	Solyc08g016796.1.1	Unknown protein
Replicates 2_2	SL4.0ch02	41387731	41387931	SL4.0ch02:41387831	26.7	-93	Solyc02g078760.1.1	hypothetical protein (AHRD V3.3 *** AT1G11125.1)
Replicates 2_1	SL4.0ch02	41387732	41387932	SL4.0ch02:41387832	26.7	-94	Solyc02g078760.1.1	hypothetical protein (AHRD V3.3 *** AT1G11125.1)
Replicates 3_3	SL4.0ch08	9515541	9515741	SL4.0ch08:9515641	164.8	-95	Solyc08g016796.1.1	Unknown protein
Replicates 3_2	SL4.0ch08	9515540	9515740	SL4.0ch08:9515640	165	-96	Solyc08g016796.1.1	Unknown protein
Replicates 3_2	SL4.0ch09	65595899	65596099	SL4.0ch09:65595999	29	-96	Solyc09g089870.3.1	bHLH transcription factor 061
Replicates 3_3	SL4.0ch10	1501990	1502190	SL4.0ch10:1502090	24.2	-98	Solyc10g007170.2.1	transcription factor GTE4-like (AHRD V3.3 *-* A0A1U7YX65_NICSY)
Replicates 2_3	SL4.0ch10	1501991	1502191	SL4.0ch10:1502091	32	-99	Solyc10g007170.2.1	transcription factor GTE4-like (AHRD V3.3 *-* A0A1U7YX65_NICSY)
Replicates 2_2	SL4.0ch10	1501992	1502192	SL4.0ch10:1502092	32	-100	Solyc10g007170.2.1	transcription factor GTE4-like (AHRD V3.3 *-* A0A1U7YX65_NICSY)
Replicates 3_1	SL4.0ch09	65595905	65596105	SL4.0ch09:65596005	30	-102	Solyc09g089870.3.1	bHLH transcription factor 061
Replicates 1_1	SL4.0ch10	1501995	1502195	SL4.0ch10:1502095	36	-103	Solyc10g007170.2.1	transcription factor GTE4-like (AHRD V3.3 *-* A0A1U7YX65_NICSY)
Replicates 3_2	SL4.0ch10	1501995	1502195	SL4.0ch10:1502095	23.3	-103	Solyc10g007170.2.1	transcription factor GTE4-like (AHRD V3.3 *-* A0A1U7YX65_NICSY)
Replicates 1_2	SL4.0ch10	1501996	1502196	SL4.0ch10:1502096	20.8	-104	Solyc10g007170.2.1	transcription factor GTE4-like (AHRD V3.3 *-* A0A1U7YX65_NICSY)
Replicates 2_3	SL4.0ch04	55724258	55724458	SL4.0ch04:55724358	27.4	-104	Solyc04g071040.4.1	Regulator of chromosome condensation (RCC1) family protein (AHRD V3.3 *** A0A1P8B4Z7_ARATH)
Replicates 3_2	SL4.0ch04	59859145	59859345	SL4.0ch04:59859245	25	-104	Solyc04g076920.3.1	beta3-glucuronyltransferase
Replicates 3_3	SL4.0ch06	5261423	5261623	SL4.0ch06:5261523	21	-104	Solyc06g010160.2.1	Nucleotide/sugar transporter family protein (AHRD V3.3 *-* A0A2U1QP35_ARTAN)
Replicates 1_3	SL4.0ch10	1501997	1502197	SL4.0ch10:1502097	20.7	-105	Solyc10g007170.2.1	transcription factor GTE4-like (AHRD V3.3 *-* A0A1U7YX65_NICSY)
Replicates 3_2	SL4.0ch06	5261424	5261624	SL4.0ch06:5261524	21	-105	Solyc06g010160.2.1	Nucleotide/sugar transporter family protein (AHRD V3.3 *-* A0A2U1QP35_ARTAN)
Replicates 3_1	SL4.0ch10	1501998	1502198	SL4.0ch10:1502098	26.2	-106	Solyc10g007170.2.1	transcription factor GTE4-like (AHRD V3.3 *-* A0A1U7YX65_NICSY)
Replicates 3_2	SL4.0ch04	55724262	55724462	SL4.0ch04:55724362	26.9	-108	Solyc04g071040.4.1	Regulator of chromosome condensation (RCC1) family protein (AHRD V3.3 *** A0A1P8B4Z7_ARATH)
Replicates 1_1	SL4.0ch02	32432695	32432895	SL4.0ch02:32432795	22	-110	Solyc02g062700.3.1	ATPase family AAA domain-containing protein 3-like (AHRD V3.3 *** A0A2I4E883_9ROSI)
Replicates 1_3	SL4.0ch05	2178704	2178904	SL4.0ch05:2178804	46.7	-111	Solyc05g007590.5.1	Aminotransferase
Replicates 3_2	SL4.0ch08	56614016	56614216	SL4.0ch08:56614116	27	-111	Solyc08g074370.4.1	DDB1-and CUL4-associated factor-like protein 1 (AHRD V3.3 *** A0A2G2XMQ1_CAPBA)
Replicates 3_3	SL4.0ch05	2178705	2178905	SL4.0ch05:2178805	32.7	-112	Solyc05g007590.5.1	Aminotransferase
Replicates 3_3	SL4.0ch08	56614017	56614217	SL4.0ch08:56614117	27	-112	Solyc08g074370.4.1	DDB1-and CUL4-associated factor-like protein 1 (AHRD V3.3 *** A0A2G2XMQ1_CAPBA)
Replicates 1_1	SL4.0ch05	2178706	2178906	SL4.0ch05:2178806	46.7	-113	Solyc05g007590.5.1	Aminotransferase
Replicates 1_2	SL4.0ch04	26607806	26608006	SL4.0ch04:26607906	33	-114	Solyc04g024960.1.1	Unknown protein
Replicates 3_1	SL4.0ch08	56614019	56614219	SL4.0ch08:56614119	27	-114	Solyc08g074370.4.1	DDB1-and CUL4-associated factor-like protein 1 (AHRD V3.3 *** A0A2G2XMQ1_CAPBA)
Replicates 3_3	SL4.0ch04	57829628	57829828	SL4.0ch04:57829728	21.8	-114	Solyc04g072910.3.1	Endoplasmic reticulum-Golgi intermediate compartment protein 3 (AHRD V3.3 *** A0A2G3CNL7_CAPCH)
Replicates 1_3	SL4.0ch01	1295147	1295347	SL4.0ch01:1295247	26	-116	Solyc01g006710.4.1	Helicase (AHRD V3.3 *** A0A200PRN8_9MAGN)
Replicates 2_2	SL4.0ch05	61009688	61009888	SL4.0ch05:61009788	31.1	-116	Solyc05g051340.3.1	Pentatricopeptide repeat-containing protein (AHRD V3.3 *** A0A2I0WS88_9ASPA)
Replicates 2_3	SL4.0ch05	61009687	61009887	SL4.0ch05:61009787	31	-117	Solyc05g051340.3.1	Pentatricopeptide repeat-containing protein (AHRD V3.3 *** A0A2I0WS88_9ASPA)
Replicates 3_3	SL4.0ch01	1295146	1295346	SL4.0ch01:1295246	19.4	-117	Solyc01g006710.4.1	Helicase (AHRD V3.3 *** A0A200PRN8_9MAGN)
Replicates 1_1	SL4.0ch01	1295145	1295345	SL4.0ch01:1295245	26	-118	Solyc01g006710.4.1	Helicase (AHRD V3.3 *** A0A200PRN8_9MAGN)
Replicates 3_1	SL4.0ch04	26607802	26608002	SL4.0ch04:26607902	35	-118	Solyc04g024960.1.1	Unknown protein
Replicates 3_2	SL4.0ch04	26607802	26608002	SL4.0ch04:26607902	35	-118	Solyc04g024960.1.1	Unknown protein
Replicates 3_2	SL4.0ch04	57829632	57829832	SL4.0ch04:57829732	21.7	-118	Solyc04g072910.3.1	Endoplasmic reticulum-Golgi intermediate compartment protein 3 (AHRD V3.3 *** A0A2G3CNL7_CAPCH)
Replicates 2_1	SL4.0ch04	26607801	26608001	SL4.0ch04:26607901	27	-119	Solyc04g024960.1.1	Unknown protein
Replicates 2_1	SL4.0ch02	43050162	43050362	SL4.0ch02:43050262	35	-119	Solyc02g080990.2.1	Leucine--tRNA ligase (AHRD V3.3 *** A0A2G3D719_CAPCH)
Replicates 2_3	SL4.0ch02	43050162	43050362	SL4.0ch02:43050262	35	-119	Solyc02g080990.2.1	Leucine--tRNA ligase (AHRD V3.3 *** A0A2G3D719_CAPCH)
Replicates 2_3	SL4.0ch00	589120	589320	SL4.0ch00:589220	26.7	-119	Solyc00g500013.1.1	Unknown protein
Replicates 1_2	SL4.0ch02	50948805	50949005	SL4.0ch02:50948905	22.3	-120	Solyc02g091670.1.1	Octicosapeptide/Phox/Bem1p family protein (AHRD V3.3 *-* A0A1P8BCE3_ARATH)
Replicates 1_1	SL4.0ch04	26607799	26607999	SL4.0ch04:26607899	23	-121	Solyc04g024960.1.1	Unknown protein
Replicates 2_2	SL4.0ch04	26607799	26607999	SL4.0ch04:26607899	40.9	-121	Solyc04g024960.1.1	Unknown protein
Replicates 3_1	SL4.0ch09	4409050	4409250	SL4.0ch09:4409150	23.2	-121	Solyc09g011030.3.1	Hsp70 nucleotide exchange factor FES1 (AHRD V3.3 *** A0A1J3K956_NOCCA)
Replicates 1_3	SL4.0ch02	50948807	50949007	SL4.0ch02:50948907	22.3	-122	Solyc02g091670.1.1	Octicosapeptide/Phox/Bem1p family protein (AHRD V3.3 *-* A0A1P8BCE3_ARATH)
Replicates 3_2	SL4.0ch01	75002517	75002717	SL4.0ch01:75002617	21.5	-123	Solyc01g087890.3.1	Plasma-membrane choline transporter family protein (AHRD V3.3 *** F4K425_ARATH)
Replicates 3_3	SL4.0ch04	26607797	26607997	SL4.0ch04:26607897	34	-123	Solyc04g024960.1.1	Unknown protein
Replicates 2_2	SL4.0ch09	4409053	4409253	SL4.0ch09:4409153	34	-124	Solyc09g011030.3.1	Hsp70 nucleotide exchange factor FES1 (AHRD V3.3 *** A0A1J3K956_NOCCA)
Replicates 3_1	SL4.0ch01	3624629	3624829	SL4.0ch01:3624729	22	-124	Solyc01g009443.2.1	Mitochondrial inner membrane protease ATP23 (AHRD V3.11 *** tr|A0A2G3DGC1|A0A2G3DGC1_CAPCH)
Replicates 2_3	SL4.0ch09	4409054	4409254	SL4.0ch09:4409154	34	-125	Solyc09g011030.3.1	Hsp70 nucleotide exchange factor FES1 (AHRD V3.3 *** A0A1J3K956_NOCCA)
Replicates 2_3	SL4.0ch02	50948810	50949010	SL4.0ch02:50948910	26.7	-125	Solyc02g091670.1.1	Octicosapeptide/Phox/Bem1p family protein (AHRD V3.3 *-* A0A1P8BCE3_ARATH)
Replicates 3_3	SL4.0ch03	3699005	3699205	SL4.0ch03:3699105	24.8	-126	Solyc03g026270.3.1	CRT binding factor 3 (AHRD V3.3 *** B3TPP7_SOLPI)
Replicates 2_2	SL4.0ch02	43050170	43050370	SL4.0ch02:43050270	35	-127	Solyc02g080990.2.1	Leucine--tRNA ligase (AHRD V3.3 *** A0A2G3D719_CAPCH)
Replicates 2_2	SL4.0ch01	3624632	3624832	SL4.0ch01:3624732	26	-127	Solyc01g009443.2.1	Mitochondrial inner membrane protease ATP23 (AHRD V3.11 *** tr|A0A2G3DGC1|A0A2G3DGC1_CAPCH)
Replicates 3_2	SL4.0ch01	3624632	3624832	SL4.0ch01:3624732	22	-127	Solyc01g009443.2.1	Mitochondrial inner membrane protease ATP23 (AHRD V3.11 *** tr|A0A2G3DGC1|A0A2G3DGC1_CAPCH)
Replicates 1_2	SL4.0ch11	50038006	50038206	SL4.0ch11:50038106	35	-128	Solyc11g066280.3.1	ribosome production factor 1 (AHRD V3.3 *** A0A2I4FRK6_9ROSI)
Replicates 2_1	SL4.0ch01	3624633	3624833	SL4.0ch01:3624733	26	-128	Solyc01g009443.2.1	Mitochondrial inner membrane protease ATP23 (AHRD V3.11 *** tr|A0A2G3DGC1|A0A2G3DGC1_CAPCH)
Replicates 1_1	SL4.0ch11	50038005	50038205	SL4.0ch11:50038105	35	-129	Solyc11g066280.3.1	ribosome production factor 1 (AHRD V3.3 *** A0A2I4FRK6_9ROSI)
Replicates 3_2	SL4.0ch10	63759036	63759236	SL4.0ch10:63759136	19.7	-129	Solyc10g085410.3.1	Cactin (AHRD V3.3 *** A0A2G3BFE1_CAPCH)
Replicates 3_3	SL4.0ch04	55724284	55724484	SL4.0ch04:55724384	26.6	-130	Solyc04g071040.4.1	Regulator of chromosome condensation (RCC1) family protein (AHRD V3.3 *** A0A1P8B4Z7_ARATH)
Replicates 2_2	SL4.0ch11	50038002	50038202	SL4.0ch11:50038102	27	-132	Solyc11g066280.3.1	ribosome production factor 1 (AHRD V3.3 *** A0A2I4FRK6_9ROSI)
Replicates 3_2	SL4.0ch03	3698998	3699198	SL4.0ch03:3699098	23.4	-133	Solyc03g026270.3.1	CRT binding factor 3 (AHRD V3.3 *** B3TPP7_SOLPI)
Replicates 3_1	SL4.0ch04	55724289	55724489	SL4.0ch04:55724389	25.6	-135	Solyc04g071040.4.1	Regulator of chromosome condensation (RCC1) family protein (AHRD V3.3 *** A0A1P8B4Z7_ARATH)
Replicates 3_3	SL4.0ch00	3703925	3704125	SL4.0ch00:3704025	126.6	-140	Solyc00g500183.1.1	NADH dehydrogenase subunit 7 (AHRD V3.3 *-* A0A220T1K3_9ROSI)
Replicates 3_2	SL4.0ch00	3703924	3704124	SL4.0ch00:3704024	126.6	-141	Solyc00g500183.1.1	NADH dehydrogenase subunit 7 (AHRD V3.3 *-* A0A220T1K3_9ROSI)
Replicates 3_1	SL4.0ch00	3703923	3704123	SL4.0ch00:3704023	126.1	-142	Solyc00g500183.1.1	NADH dehydrogenase subunit 7 (AHRD V3.3 *-* A0A220T1K3_9ROSI)
Replicates 1_3	SL4.0ch01	57551524	57551724	SL4.0ch01:57551624	21	-145	Solyc01g057910.3.1	R2R3MYB transcription factor 2
Replicates 2_2	SL4.0ch00	9239183	9239383	SL4.0ch00:9239283	55.3	-145	Solyc00g500400.1.1	Unknown protein
Replicates 2_3	SL4.0ch00	9239182	9239382	SL4.0ch00:9239282	55.4	-146	Solyc00g500400.1.1	Unknown protein
Replicates 3_3	SL4.0ch09	4409076	4409276	SL4.0ch09:4409176	33	-147	Solyc09g011030.3.1	Hsp70 nucleotide exchange factor FES1 (AHRD V3.3 *** A0A1J3K956_NOCCA)
Replicates 2_1	SL4.0ch08	54436097	54436297	SL4.0ch08:54436197	26	-148	Solyc08g067280.1.1	Unknown protein
Replicates 3_2	SL4.0ch09	4409077	4409277	SL4.0ch09:4409177	24.4	-148	Solyc09g011030.3.1	Hsp70 nucleotide exchange factor FES1 (AHRD V3.3 *** A0A1J3K956_NOCCA)
Replicates 2_1	SL4.0ch02	45967238	45967438	SL4.0ch02:45967338	26	-152	Solyc02g084890.3.1	Disease resistance RPP13-like protein 4 (AHRD V3.3 *** A0A2G2XGN6_CAPBA)
Replicates 2_2	SL4.0ch02	40738344	40738544	SL4.0ch02:40738444	45	-155	Solyc02g077940.1.1	Unknown protein
Replicates 3_3	SL4.0ch02	40738342	40738542	SL4.0ch02:40738442	19.8	-157	Solyc02g077940.1.1	Unknown protein
Replicates 2_2	SL4.0ch08	52288904	52289104	SL4.0ch08:52289004	31.8	-161	Solyc08g065850.1.1	Unknown protein
Replicates 2_3	SL4.0ch08	52288905	52289105	SL4.0ch08:52289005	30.4	-162	Solyc08g065850.1.1	Unknown protein
Replicates 1_1	SL4.0ch02	3132687	3132887	SL4.0ch02:3132787	20	-163	Solyc02g160080.1.1	Gag/pol polyprotein (AHRD V3.11 *-* tr|Q6WAY7|Q6WAY7_PEA)
Replicates 2_1	SL4.0ch08	2848149	2848349	SL4.0ch08:2848249	40.3	-165	Solyc08g008440.2.1	Unknown protein
Replicates 2_3	SL4.0ch08	2848149	2848349	SL4.0ch08:2848249	40.3	-165	Solyc08g008440.2.1	Unknown protein
Replicates 2_2	SL4.0ch08	2848148	2848348	SL4.0ch08:2848248	40.3	-166	Solyc08g008440.2.1	Unknown protein
Replicates 1_2	SL4.0ch07	937405	937605	SL4.0ch07:937505	28.8	-169	Solyc07g006100.4.1	Oxysterol-binding protein-related protein 1D (AHRD V3.3 *** A0A2G3BX83_CAPCH)
Replicates 2_2	SL4.0ch00	6964596	6964796	SL4.0ch00:6964696	38.6	-169	Solyc00g500305.1.1	Unknown protein
Replicates 1_3	SL4.0ch07	937407	937607	SL4.0ch07:937507	28.8	-171	Solyc07g006100.4.1	Oxysterol-binding protein-related protein 1D (AHRD V3.3 *** A0A2G3BX83_CAPCH)
Replicates 1_1	SL4.0ch07	937409	937609	SL4.0ch07:937509	28.7	-173	Solyc07g006100.4.1	Oxysterol-binding protein-related protein 1D (AHRD V3.3 *** A0A2G3BX83_CAPCH)
Replicates 3_2	SL4.0ch07	937409	937609	SL4.0ch07:937509	23.7	-173	Solyc07g006100.4.1	Oxysterol-binding protein-related protein 1D (AHRD V3.3 *** A0A2G3BX83_CAPCH)
Replicates 3_2	SL4.0ch03	59969900	59970100	SL4.0ch03:59970000	23	-173	Solyc03g116010.3.1	RWP-RK domain-containing protein (AHRD V3.3 *** A0A1Q3AZ30_CEPFO)
Replicates 2_3	SL4.0ch07	937410	937610	SL4.0ch07:937510	32.4	-174	Solyc07g006100.4.1	Oxysterol-binding protein-related protein 1D (AHRD V3.3 *** A0A2G3BX83_CAPCH)
Replicates 3_3	SL4.0ch07	937411	937611	SL4.0ch07:937511	23.7	-175	Solyc07g006100.4.1	Oxysterol-binding protein-related protein 1D (AHRD V3.3 *** A0A2G3BX83_CAPCH)
Replicates 3_1	SL4.0ch03	59969903	59970103	SL4.0ch03:59970003	23	-176	Solyc03g116010.3.1	RWP-RK domain-containing protein (AHRD V3.3 *** A0A1Q3AZ30_CEPFO)
Replicates 2_2	SL4.0ch11	21378226	21378426	SL4.0ch11:21378326	40	-180	Solyc11g030600.3.1	cytosine-5 DNA methyltransferase
Replicates 2_1	SL4.0ch11	21378227	21378427	SL4.0ch11:21378327	40	-181	Solyc11g030600.3.1	cytosine-5 DNA methyltransferase
Replicates 2_3	SL4.0ch11	21378227	21378427	SL4.0ch11:21378327	40	-181	Solyc11g030600.3.1	cytosine-5 DNA methyltransferase
Replicates 3_3	SL4.0ch11	21378228	21378428	SL4.0ch11:21378328	25	-182	Solyc11g030600.3.1	cytosine-5 DNA methyltransferase
Replicates 3_2	SL4.0ch02	40738313	40738513	SL4.0ch02:40738413	24.8	-186	Solyc02g077940.1.1	Unknown protein
Replicates 1_2	SL4.0ch10	1494604	1494804	SL4.0ch10:1494704	31.1	-189	Solyc10g007160.2.1	transcription factor GTE4-like (AHRD V3.3 *-* XP_022985931.1)
Replicates 3_2	SL4.0ch01	81192369	81192569	SL4.0ch01:81192469	44	-189	Solyc01g098410.4.1	Lyk13 (AHRD V3.3 *** G3KGB4_SOLLC)
Replicates 3_1	SL4.0ch10	1494603	1494803	SL4.0ch10:1494703	54.3	-190	Solyc10g007160.2.1	transcription factor GTE4-like (AHRD V3.3 *-* XP_022985931.1)
Replicates 3_2	SL4.0ch02	47552784	47552984	SL4.0ch02:47552884	46.1	-190	Solyc02g086970.4.1	Aldehyde dehydrogenase (AHRD V3.3 *** A0A2U1MUY7_ARTAN)
Replicates 2_1	SL4.0ch01	81192366	81192566	SL4.0ch01:81192466	37	-192	Solyc01g098410.4.1	Lyk13 (AHRD V3.3 *** G3KGB4_SOLLC)
Replicates 2_3	SL4.0ch01	81192366	81192566	SL4.0ch01:81192466	37	-192	Solyc01g098410.4.1	Lyk13 (AHRD V3.3 *** G3KGB4_SOLLC)
Replicates 1_1	SL4.0ch10	1494600	1494800	SL4.0ch10:1494700	36	-193	Solyc10g007160.2.1	transcription factor GTE4-like (AHRD V3.3 *-* XP_022985931.1)
Replicates 2_2	SL4.0ch01	81192365	81192565	SL4.0ch01:81192465	37	-193	Solyc01g098410.4.1	Lyk13 (AHRD V3.3 *** G3KGB4_SOLLC)
Replicates 3_3	SL4.0ch01	81192364	81192564	SL4.0ch01:81192464	44	-194	Solyc01g098410.4.1	Lyk13 (AHRD V3.3 *** G3KGB4_SOLLC)
Replicates 3_3	SL4.0ch03	60175690	60175890	SL4.0ch03:60175790	29.7	-194	Solyc03g116220.1.1	Unknown protein
Replicates 1_3	SL4.0ch01	81192363	81192563	SL4.0ch01:81192463	28	-195	Solyc01g098410.4.1	Lyk13 (AHRD V3.3 *** G3KGB4_SOLLC)
Replicates 3_2	SL4.0ch03	60175691	60175891	SL4.0ch03:60175791	28.1	-195	Solyc03g116220.1.1	Unknown protein
Replicates 1_1	SL4.0ch01	81192362	81192562	SL4.0ch01:81192462	20.3	-196	Solyc01g098410.4.1	Lyk13 (AHRD V3.3 *** G3KGB4_SOLLC)
Replicates 3_2	SL4.0ch10	1494597	1494797	SL4.0ch10:1494697	53.9	-196	Solyc10g007160.2.1	transcription factor GTE4-like (AHRD V3.3 *-* XP_022985931.1)
Replicates 1_2	SL4.0ch01	81192361	81192561	SL4.0ch01:81192461	28.8	-197	Solyc01g098410.4.1	Lyk13 (AHRD V3.3 *** G3KGB4_SOLLC)
Replicates 3_3	SL4.0ch07	44099749	44099949	SL4.0ch07:44099849	27	-197	Solyc07g037950.1.1	ectonucleotide pyrophosphatase/phosphodiesterase family member 3 (AHRD V3.3 *** A0A2I4GPP6_9ROSI)
Replicates 3_2	SL4.0ch07	44099750	44099950	SL4.0ch07:44099850	27	-198	Solyc07g037950.1.1	ectonucleotide pyrophosphatase/phosphodiesterase family member 3 (AHRD V3.3 *** A0A2I4GPP6_9ROSI)
Replicates 3_3	SL4.0ch02	47552792	47552992	SL4.0ch02:47552892	45	-198	Solyc02g086970.4.1	Aldehyde dehydrogenase (AHRD V3.3 *** A0A2U1MUY7_ARTAN)
Replicates 3_3	SL4.0ch10	1494595	1494795	SL4.0ch10:1494695	54.6	-198	Solyc10g007160.2.1	transcription factor GTE4-like (AHRD V3.3 *-* XP_022985931.1)
Replicates 2_1	SL4.0ch02	47552793	47552993	SL4.0ch02:47552893	45.2	-199	Solyc02g086970.4.1	Aldehyde dehydrogenase (AHRD V3.3 *** A0A2U1MUY7_ARTAN)
Replicates 2_3	SL4.0ch02	47552793	47552993	SL4.0ch02:47552893	45.2	-199	Solyc02g086970.4.1	Aldehyde dehydrogenase (AHRD V3.3 *** A0A2U1MUY7_ARTAN)
Replicates 2_3	SL4.0ch10	1494594	1494794	SL4.0ch10:1494694	30	-199	Solyc10g007160.2.1	transcription factor GTE4-like (AHRD V3.3 *-* XP_022985931.1)
Replicates 3_1	SL4.0ch01	81192359	81192559	SL4.0ch01:81192459	43	-199	Solyc01g098410.4.1	Lyk13 (AHRD V3.3 *** G3KGB4_SOLLC)
Replicates 1_1	SL4.0ch02	47552794	47552994	SL4.0ch02:47552894	26.7	-200	Solyc02g086970.4.1	Aldehyde dehydrogenase (AHRD V3.3 *** A0A2U1MUY7_ARTAN)
Replicates 2_2	SL4.0ch10	1494593	1494793	SL4.0ch10:1494693	30	-200	Solyc10g007160.2.1	transcription factor GTE4-like (AHRD V3.3 *-* XP_022985931.1)
Replicates 2_2	SL4.0ch02	47552794	47552994	SL4.0ch02:47552894	45	-200	Solyc02g086970.4.1	Aldehyde dehydrogenase (AHRD V3.3 *** A0A2U1MUY7_ARTAN)
Replicates 1_3	SL4.0ch10	1494591	1494791	SL4.0ch10:1494691	33.1	-202	Solyc10g007160.2.1	transcription factor GTE4-like (AHRD V3.3 *-* XP_022985931.1)
Replicates 1_3	SL4.0ch02	47552796	47552996	SL4.0ch02:47552896	26.3	-202	Solyc02g086970.4.1	Aldehyde dehydrogenase (AHRD V3.3 *** A0A2U1MUY7_ARTAN)
Replicates 3_1	SL4.0ch02	47552797	47552997	SL4.0ch02:47552897	44	-203	Solyc02g086970.4.1	Aldehyde dehydrogenase (AHRD V3.3 *** A0A2U1MUY7_ARTAN)
Replicates 1_2	SL4.0ch02	47552798	47552998	SL4.0ch02:47552898	25.7	-204	Solyc02g086970.4.1	Aldehyde dehydrogenase (AHRD V3.3 *** A0A2U1MUY7_ARTAN)
Replicates 2_1	SL4.0ch09	61973195	61973395	SL4.0ch09:61973295	27	-207	Solyc09g074070.1.1	Unknown protein
Replicates 2_3	SL4.0ch09	61973195	61973395	SL4.0ch09:61973295	27	-207	Solyc09g074070.1.1	Unknown protein
Replicates 2_2	SL4.0ch09	61973194	61973394	SL4.0ch09:61973294	27	-208	Solyc09g074070.1.1	Unknown protein
Replicates 2_2	SL4.0ch00	8476091	8476291	SL4.0ch00:8476191	43.2	-209	Solyc00g500368.1.1	Unknown protein
Replicates 2_1	SL4.0ch00	8476090	8476290	SL4.0ch00:8476190	43.3	-210	Solyc00g500368.1.1	Unknown protein
Replicates 2_3	SL4.0ch00	8476090	8476290	SL4.0ch00:8476190	43.2	-210	Solyc00g500368.1.1	Unknown protein
Replicates 1_3	SL4.0ch05	62044862	62045062	SL4.0ch05:62044962	19.5	-215	Solyc05g052420.3.1	Abscisic acid receptor PYL6 (AHRD V3.3 *-* A0A1U8GQ86_CAPAN)
Replicates 2_1	SL4.0ch05	62044862	62045062	SL4.0ch05:62044962	35.2	-215	Solyc05g052420.3.1	Abscisic acid receptor PYL6 (AHRD V3.3 *-* A0A1U8GQ86_CAPAN)
Replicates 2_3	SL4.0ch00	627795	627995	SL4.0ch00:627895	64.9	-225	Solyc00g500014.1.1	Unknown protein
Replicates 2_2	SL4.0ch00	627794	627994	SL4.0ch00:627894	88.1	-226	Solyc00g500014.1.1	Unknown protein
Replicates 2_2	SL4.0ch10	55505888	55506088	SL4.0ch10:55505988	33	-238	Solyc10g160140.1.1	UBN2_3 domain-containing protein (AHRD V3.11 *-* tr|A0A1Q3BK16|A0A1Q3BK16_CEPFO)
Replicates 2_2	SL4.0ch05	7384966	7385166	SL4.0ch05:7385066	41	-240	Solyc05g013880.2.1	Transducin/WD40 repeat-like superfamily protein (AHRD V3.11 *** tr|A0A2U1NTK1|A0A2U1NTK1_ARTAN)
Replicates 2_1	SL4.0ch05	7384967	7385167	SL4.0ch05:7385067	42	-241	Solyc05g013880.2.1	Transducin/WD40 repeat-like superfamily protein (AHRD V3.11 *** tr|A0A2U1NTK1|A0A2U1NTK1_ARTAN)
Replicates 3_3	SL4.0ch05	7384968	7385168	SL4.0ch05:7385068	25	-242	Solyc05g013880.2.1	Transducin/WD40 repeat-like superfamily protein (AHRD V3.11 *** tr|A0A2U1NTK1|A0A2U1NTK1_ARTAN)
Replicates 3_2	SL4.0ch05	7384969	7385169	SL4.0ch05:7385069	25	-243	Solyc05g013880.2.1	Transducin/WD40 repeat-like superfamily protein (AHRD V3.11 *** tr|A0A2U1NTK1|A0A2U1NTK1_ARTAN)
Replicates 3_3	SL4.0ch07	65089178	65089378	SL4.0ch07:65089278	20.4	-245	Solyc07g062547.1.1	UDP-N-acetylglucosamine 1-carboxyvinyltransferase (AHRD V3.3 *-* A0A1E7W1A5_9BURK)
Replicates 3_3	SL4.0ch12	64700325	64700525	SL4.0ch12:64700425	20.5	-256	Solyc12g096140.3.1	Unknown protein
Replicates 2_3	SL4.0ch07	55108444	55108644	SL4.0ch07:55108544	26.2	-257	Solyc07g042230.1.1	Ethylene-responsive transcription factor (AHRD V3.3 *-* A0A2G2WJA8_CAPBA)
Replicates 3_1	SL4.0ch05	7384983	7385183	SL4.0ch05:7385083	23	-257	Solyc05g013880.2.1	Transducin/WD40 repeat-like superfamily protein (AHRD V3.11 *** tr|A0A2U1NTK1|A0A2U1NTK1_ARTAN)
Replicates 1_1	SL4.0ch05	7384986	7385186	SL4.0ch05:7385086	25	-260	Solyc05g013880.2.1	Transducin/WD40 repeat-like superfamily protein (AHRD V3.11 *** tr|A0A2U1NTK1|A0A2U1NTK1_ARTAN)
Replicates 2_1	SL4.0ch02	40738239	40738439	SL4.0ch02:40738339	31	-260	Solyc02g077940.1.1	Unknown protein
Replicates 1_3	SL4.0ch05	7384987	7385187	SL4.0ch05:7385087	25	-261	Solyc05g013880.2.1	Transducin/WD40 repeat-like superfamily protein (AHRD V3.11 *** tr|A0A2U1NTK1|A0A2U1NTK1_ARTAN)
Replicates 1_1	SL4.0ch11	18638872	18639072	SL4.0ch11:18638972	19	-264	Solyc11g027920.2.1	Ribulose bisphosphate carboxylase/oxygenase activase
Replicates 2_3	SL4.0ch05	7384990	7385190	SL4.0ch05:7385090	43	-264	Solyc05g013880.2.1	Transducin/WD40 repeat-like superfamily protein (AHRD V3.11 *** tr|A0A2U1NTK1|A0A2U1NTK1_ARTAN)
Replicates 3_2	SL4.0ch07	65089206	65089406	SL4.0ch07:65089306	19.6	-273	Solyc07g062547.1.1	UDP-N-acetylglucosamine 1-carboxyvinyltransferase (AHRD V3.3 *-* A0A1E7W1A5_9BURK)
Replicates 2_3	SL4.0ch07	66567694	66567894	SL4.0ch07:66567794	28	-276	Solyc07g064700.4.1	Bromodomain-containing protein (AHRD V3.3 *** A0A2K3PD43_TRIPR)
Replicates 3_2	SL4.0ch10	1502168	1502368	SL4.0ch10:1502268	28.7	-276	Solyc10g007170.2.1	transcription factor GTE4-like (AHRD V3.3 *-* A0A1U7YX65_NICSY)
Replicates 3_3	SL4.0ch10	1502169	1502369	SL4.0ch10:1502269	27.8	-277	Solyc10g007170.2.1	transcription factor GTE4-like (AHRD V3.3 *-* A0A1U7YX65_NICSY)
Replicates 2_1	SL4.0ch07	66567697	66567897	SL4.0ch07:66567797	28	-279	Solyc07g064700.4.1	Bromodomain-containing protein (AHRD V3.3 *** A0A2K3PD43_TRIPR)
Replicates 2_2	SL4.0ch00	9254675	9254875	SL4.0ch00:9254775	193	-280	Solyc00g500403.1.1	Unknown protein
Replicates 2_2	SL4.0ch07	66567698	66567898	SL4.0ch07:66567798	28	-280	Solyc07g064700.4.1	Bromodomain-containing protein (AHRD V3.3 *** A0A2K3PD43_TRIPR)
Replicates 2_1	SL4.0ch00	9254674	9254874	SL4.0ch00:9254774	194	-281	Solyc00g500403.1.1	Unknown protein
Replicates 2_3	SL4.0ch00	9254674	9254874	SL4.0ch00:9254774	194	-281	Solyc00g500403.1.1	Unknown protein
Replicates 3_1	SL4.0ch10	1502174	1502374	SL4.0ch10:1502274	25.8	-282	Solyc10g007170.2.1	transcription factor GTE4-like (AHRD V3.3 *-* A0A1U7YX65_NICSY)
Replicates 1_2	SL4.0ch06	31911836	31912036	SL4.0ch06:31911936	28	-287	Solyc06g051040.5.1	Mitotic checkpoint serine/threonine-protein kinase BUB1-like protein (AHRD V3.11 *-* tr|A0A2K3L1J0|A0A2K3L1J0_TRIPR)
Replicates 1_3	SL4.0ch06	31911838	31912038	SL4.0ch06:31911938	28	-289	Solyc06g051040.5.1	Mitotic checkpoint serine/threonine-protein kinase BUB1-like protein (AHRD V3.11 *-* tr|A0A2K3L1J0|A0A2K3L1J0_TRIPR)
Replicates 2_2	SL4.0ch09	955452	955652	SL4.0ch09:955552	29.3	-289	Solyc09g007340.5.1	Tudor/PWWP/MBT superfamily protein (AHRD V3.11 *-* tr|Q9SF36|Q9SF36_ARATH)
Replicates 1_1	SL4.0ch06	31911840	31912040	SL4.0ch06:31911940	28	-291	Solyc06g051040.5.1	Mitotic checkpoint serine/threonine-protein kinase BUB1-like protein (AHRD V3.11 *-* tr|A0A2K3L1J0|A0A2K3L1J0_TRIPR)
Replicates 2_2	SL4.0ch06	31911840	31912040	SL4.0ch06:31911940	33	-291	Solyc06g051040.5.1	Mitotic checkpoint serine/threonine-protein kinase BUB1-like protein (AHRD V3.11 *-* tr|A0A2K3L1J0|A0A2K3L1J0_TRIPR)
Replicates 3_1	SL4.0ch06	31911840	31912040	SL4.0ch06:31911940	28	-291	Solyc06g051040.5.1	Mitotic checkpoint serine/threonine-protein kinase BUB1-like protein (AHRD V3.11 *-* tr|A0A2K3L1J0|A0A2K3L1J0_TRIPR)
Replicates 2_1	SL4.0ch06	31911841	31912041	SL4.0ch06:31911941	33	-292	Solyc06g051040.5.1	Mitotic checkpoint serine/threonine-protein kinase BUB1-like protein (AHRD V3.11 *-* tr|A0A2K3L1J0|A0A2K3L1J0_TRIPR)
Replicates 2_3	SL4.0ch06	31911841	31912041	SL4.0ch06:31911941	33	-292	Solyc06g051040.5.1	Mitotic checkpoint serine/threonine-protein kinase BUB1-like protein (AHRD V3.11 *-* tr|A0A2K3L1J0|A0A2K3L1J0_TRIPR)
Replicates 3_3	SL4.0ch06	31911842	31912042	SL4.0ch06:31911942	28	-293	Solyc06g051040.5.1	Mitotic checkpoint serine/threonine-protein kinase BUB1-like protein (AHRD V3.11 *-* tr|A0A2K3L1J0|A0A2K3L1J0_TRIPR)
Replicates 3_2	SL4.0ch06	31911846	31912046	SL4.0ch06:31911946	28	-297	Solyc06g051040.5.1	Mitotic checkpoint serine/threonine-protein kinase BUB1-like protein (AHRD V3.11 *-* tr|A0A2K3L1J0|A0A2K3L1J0_TRIPR)
Replicates 1_1	SL4.0ch01	81192242	81192442	SL4.0ch01:81192342	18.9	-316	Solyc01g098410.4.1	Lyk13 (AHRD V3.3 *** G3KGB4_SOLLC)
Replicates 2_1	SL4.0ch05	36482321	36482521	SL4.0ch05:36482421	27.1	-316	Solyc05g025760.1.1	Unknown protein
Replicates 2_3	SL4.0ch05	36482321	36482521	SL4.0ch05:36482421	29	-316	Solyc05g025760.1.1	Unknown protein
Replicates 3_2	SL4.0ch00	3703732	3703932	SL4.0ch00:3703832	163.4	-333	Solyc00g500183.1.1	NADH dehydrogenase subunit 7 (AHRD V3.3 *-* A0A220T1K3_9ROSI)
Replicates 3_2	SL4.0ch01	69011408	69011608	SL4.0ch01:69011508	20	-334	Solyc01g067510.3.1	receptor-like protein kinase FERONIA (AHRD V3.3 *** A0A2I4F2T3_9ROSI)
Replicates 3_3	SL4.0ch00	3703731	3703931	SL4.0ch00:3703831	163.4	-334	Solyc00g500183.1.1	NADH dehydrogenase subunit 7 (AHRD V3.3 *-* A0A220T1K3_9ROSI)
Replicates 1_1	SL4.0ch00	3703729	3703929	SL4.0ch00:3703829	199	-336	Solyc00g500183.1.1	NADH dehydrogenase subunit 7 (AHRD V3.3 *-* A0A220T1K3_9ROSI)
Replicates 2_2	SL4.0ch00	3703729	3703929	SL4.0ch00:3703829	210.2	-336	Solyc00g500183.1.1	NADH dehydrogenase subunit 7 (AHRD V3.3 *-* A0A220T1K3_9ROSI)
Replicates 1_3	SL4.0ch00	3703727	3703927	SL4.0ch00:3703827	199	-338	Solyc00g500183.1.1	NADH dehydrogenase subunit 7 (AHRD V3.3 *-* A0A220T1K3_9ROSI)
Replicates 2_1	SL4.0ch00	3703727	3703927	SL4.0ch00:3703827	209.6	-338	Solyc00g500183.1.1	NADH dehydrogenase subunit 7 (AHRD V3.3 *-* A0A220T1K3_9ROSI)
Replicates 2_3	SL4.0ch00	3703727	3703927	SL4.0ch00:3703827	209.6	-338	Solyc00g500183.1.1	NADH dehydrogenase subunit 7 (AHRD V3.3 *-* A0A220T1K3_9ROSI)
Replicates 3_1	SL4.0ch00	3703726	3703926	SL4.0ch00:3703826	165.9	-339	Solyc00g500183.1.1	NADH dehydrogenase subunit 7 (AHRD V3.3 *-* A0A220T1K3_9ROSI)
Replicates 1_2	SL4.0ch00	3703725	3703925	SL4.0ch00:3703825	201	-340	Solyc00g500183.1.1	NADH dehydrogenase subunit 7 (AHRD V3.3 *-* A0A220T1K3_9ROSI)
Replicates 3_1	SL4.0ch06	34838671	34838871	SL4.0ch06:34838771	23	-342	Solyc06g054220.2.1	Unknown protein
Replicates 3_2	SL4.0ch06	34838665	34838865	SL4.0ch06:34838765	20.1	-348	Solyc06g054220.2.1	Unknown protein
Replicates 2_1	SL4.0ch11	17753015	17753215	SL4.0ch11:17753115	64	-351	Solyc11g051174.1.1	Unknown protein
Replicates 2_2	SL4.0ch12	23194142	23194342	SL4.0ch12:23194242	34.8	-352	Solyc12g026360.1.1	Unknown protein
Replicates 2_1	SL4.0ch12	23194141	23194341	SL4.0ch12:23194241	35.5	-353	Solyc12g026360.1.1	Unknown protein
Replicates 3_1	SL4.0ch02	40738146	40738346	SL4.0ch02:40738246	22.4	-353	Solyc02g077940.1.1	Unknown protein
Replicates 2_2	SL4.0ch00	2962857	2963057	SL4.0ch00:2962957	48.3	-357	Solyc00g500164.1.1	Unknown protein
Replicates 2_1	SL4.0ch00	2962858	2963058	SL4.0ch00:2962958	48.8	-358	Solyc00g500164.1.1	Unknown protein
Replicates 2_3	SL4.0ch00	2962858	2963058	SL4.0ch00:2962958	49.2	-358	Solyc00g500164.1.1	Unknown protein
Replicates 3_3	SL4.0ch02	40738141	40738341	SL4.0ch02:40738241	22.2	-358	Solyc02g077940.1.1	Unknown protein
Replicates 2_2	SL4.0ch11	3283808	3284008	SL4.0ch11:3283908	26	-367	Solyc11g010160.1.1	Disease resistance protein (AHRD V3.3 *** A0A200RBM1_9MAGN)
Replicates 2_3	SL4.0ch05	16997020	16997220	SL4.0ch05:16997120	29	-370	Solyc05g016465.1.1	Unknown protein
Replicates 2_2	SL4.0ch05	16997021	16997221	SL4.0ch05:16997121	29	-371	Solyc05g016465.1.1	Unknown protein
Replicates 2_2	SL4.0ch08	2847937	2848137	SL4.0ch08:2848037	29.7	-377	Solyc08g008440.2.1	Unknown protein
Replicates 3_2	SL4.0ch08	2847937	2848137	SL4.0ch08:2848037	19.8	-377	Solyc08g008440.2.1	Unknown protein
Replicates 3_3	SL4.0ch05	8412658	8412858	SL4.0ch05:8412758	23	-377	Solyc05g014490.3.1	Pentatricopeptide repeat (AHRD V3.3 *** A0A200RCQ9_9MAGN)
Replicates 2_1	SL4.0ch07	55187546	55187746	SL4.0ch07:55187646	30	-378	Solyc07g042260.4.1	Auxin Response Factor 7
Replicates 2_1	SL4.0ch08	2847936	2848136	SL4.0ch08:2848036	29.7	-378	Solyc08g008440.2.1	Unknown protein
Replicates 2_3	SL4.0ch08	2847936	2848136	SL4.0ch08:2848036	29.7	-378	Solyc08g008440.2.1	Unknown protein
Replicates 3_3	SL4.0ch08	2847935	2848135	SL4.0ch08:2848035	19.9	-379	Solyc08g008440.2.1	Unknown protein
Replicates 2_2	SL4.0ch07	55187548	55187748	SL4.0ch07:55187648	31	-380	Solyc07g042260.4.1	Auxin Response Factor 7
Replicates 2_1	SL4.0ch00	627636	627836	SL4.0ch00:627736	73.5	-384	Solyc00g500014.1.1	Unknown protein
Replicates 2_3	SL4.0ch00	627636	627836	SL4.0ch00:627736	73	-384	Solyc00g500014.1.1	Unknown protein
Replicates 3_1	SL4.0ch05	8412650	8412850	SL4.0ch05:8412750	23	-385	Solyc05g014490.3.1	Pentatricopeptide repeat (AHRD V3.3 *** A0A200RCQ9_9MAGN)
Replicates 2_1	SL4.0ch12	29661965	29662165	SL4.0ch12:29662065	26	-386	Solyc12g070157.1.1	Unknown protein
Replicates 2_3	SL4.0ch12	29661965	29662165	SL4.0ch12:29662065	26	-386	Solyc12g070157.1.1	Unknown protein
Replicates 2_2	SL4.0ch00	3520334	3520534	SL4.0ch00:3520434	49.7	-408	Solyc00g500178.1.1	Unknown protein
Replicates 2_1	SL4.0ch00	3520333	3520533	SL4.0ch00:3520433	57.7	-409	Solyc00g500178.1.1	Unknown protein
Replicates 2_3	SL4.0ch00	3520333	3520533	SL4.0ch00:3520433	56.8	-409	Solyc00g500178.1.1	Unknown protein
Replicates 2_1	SL4.0ch03	12650387	12650587	SL4.0ch03:12650487	73.7	-425	Solyc03g046592.1.1	Unknown protein
Replicates 2_3	SL4.0ch03	12650387	12650587	SL4.0ch03:12650487	73.9	-425	Solyc03g046592.1.1	Unknown protein
Replicates 2_2	SL4.0ch03	12650386	12650586	SL4.0ch03:12650486	74.4	-426	Solyc03g046592.1.1	Unknown protein
Replicates 2_3	SL4.0ch02	35196057	35196257	SL4.0ch02:35196157	27	-437	Solyc02g066920.3.1	Chlororespiratory reduction 7 (AHRD V3.3 *** A0A2U1NIM3_ARTAN)
Replicates 3_2	SL4.0ch00	6982791	6982991	SL4.0ch00:6982891	38	-439	Solyc00g500306.1.1	Unknown protein
Replicates 2_3	SL4.0ch00	9138502	9138702	SL4.0ch00:9138602	76.5	-441	Solyc00g500391.1.1	Unknown protein
Replicates 3_3	SL4.0ch00	9138503	9138703	SL4.0ch00:9138603	57	-442	Solyc00g500391.1.1	Unknown protein
Replicates 3_2	SL4.0ch07	60847189	60847389	SL4.0ch07:60847289	23	-443	Solyc07g052420.3.1	hexokinase-1 protein (AHRD V3.3 *** AT1G05205.1)
Replicates 3_1	SL4.0ch07	60847192	60847392	SL4.0ch07:60847292	23	-446	Solyc07g052420.3.1	hexokinase-1 protein (AHRD V3.3 *** AT1G05205.1)
Replicates 3_2	SL4.0ch03	12650357	12650557	SL4.0ch03:12650457	29.7	-455	Solyc03g046592.1.1	Unknown protein
Replicates 3_2	SL4.0ch01	1368257	1368457	SL4.0ch01:1368357	49	-458	Solyc01g006780.4.1	Unknown protein
Replicates 3_3	SL4.0ch01	1368258	1368458	SL4.0ch01:1368358	49	-459	Solyc01g006780.4.1	Unknown protein
Replicates 1_2	SL4.0ch08	9515176	9515376	SL4.0ch08:9515276	194	-460	Solyc08g016796.1.1	Unknown protein
Replicates 2_1	SL4.0ch01	1368259	1368459	SL4.0ch01:1368359	39.8	-460	Solyc01g006780.4.1	Unknown protein
Replicates 1_1	SL4.0ch01	1368260	1368460	SL4.0ch01:1368360	31.1	-461	Solyc01g006780.4.1	Unknown protein
Replicates 3_2	SL4.0ch06	5028928	5029128	SL4.0ch06:5029028	21.9	-461	Solyc06g010140.1.1	Unknown protein
Replicates 1_3	SL4.0ch08	9515174	9515374	SL4.0ch08:9515274	193	-462	Solyc08g016796.1.1	Unknown protein
Replicates 1_3	SL4.0ch01	1368262	1368462	SL4.0ch01:1368362	31	-463	Solyc01g006780.4.1	Unknown protein
Replicates 2_2	SL4.0ch00	9253354	9253554	SL4.0ch00:9253454	69.9	-463	Solyc00g500402.1.1	Unknown protein
Replicates 1_1	SL4.0ch08	9515172	9515372	SL4.0ch08:9515272	192	-464	Solyc08g016796.1.1	Unknown protein
Replicates 2_1	SL4.0ch00	9253353	9253553	SL4.0ch00:9253453	36.6	-464	Solyc00g500402.1.1	Unknown protein
Replicates 2_2	SL4.0ch00	9248142	9248342	SL4.0ch00:9248242	27.6	-464	Solyc00g500401.1.1	Unknown protein
Replicates 2_3	SL4.0ch00	9253353	9253553	SL4.0ch00:9253453	36.6	-464	Solyc00g500402.1.1	Unknown protein
Replicates 3_1	SL4.0ch01	1368263	1368463	SL4.0ch01:1368363	49	-464	Solyc01g006780.4.1	Unknown protein
Replicates 1_2	SL4.0ch01	1368264	1368464	SL4.0ch01:1368364	30.7	-465	Solyc01g006780.4.1	Unknown protein
Replicates 2_1	SL4.0ch00	9248141	9248341	SL4.0ch00:9248241	27.5	-465	Solyc00g500401.1.1	Unknown protein
Replicates 2_3	SL4.0ch00	9248141	9248341	SL4.0ch00:9248241	27.5	-465	Solyc00g500401.1.1	Unknown protein
Replicates 3_2	SL4.0ch02	50309221	50309421	SL4.0ch02:50309321	21.5	-470	Solyc02g090760.4.1	hypothetical protein (AHRD V3.3 *-* AT3G50370.2)
Replicates 1_2	SL4.0ch02	50309211	50309411	SL4.0ch02:50309311	26	-480	Solyc02g090760.4.1	hypothetical protein (AHRD V3.3 *-* AT3G50370.2)
Replicates 3_1	SL4.0ch02	50309210	50309410	SL4.0ch02:50309310	23	-481	Solyc02g090760.4.1	hypothetical protein (AHRD V3.3 *-* AT3G50370.2)
Replicates 1_1	SL4.0ch12	66135961	66136161	SL4.0ch12:66136061	31	-482	Solyc12g099460.1.1	Unknown protein
Replicates 3_2	SL4.0ch12	66135961	66136161	SL4.0ch12:66136061	31.8	-482	Solyc12g099460.1.1	Unknown protein
Replicates 1_1	SL4.0ch02	50309207	50309407	SL4.0ch02:50309307	22.2	-484	Solyc02g090760.4.1	hypothetical protein (AHRD V3.3 *-* AT3G50370.2)
Replicates 2_2	SL4.0ch02	50309207	50309407	SL4.0ch02:50309307	40.5	-484	Solyc02g090760.4.1	hypothetical protein (AHRD V3.3 *-* AT3G50370.2)
Replicates 2_1	SL4.0ch02	50309206	50309406	SL4.0ch02:50309306	40.9	-485	Solyc02g090760.4.1	hypothetical protein (AHRD V3.3 *-* AT3G50370.2)
Replicates 2_3	SL4.0ch02	50309206	50309406	SL4.0ch02:50309306	40.9	-485	Solyc02g090760.4.1	hypothetical protein (AHRD V3.3 *-* AT3G50370.2)
Replicates 3_1	SL4.0ch12	66135967	66136167	SL4.0ch12:66136067	33.1	-488	Solyc12g099460.1.1	Unknown protein
Replicates 3_1	SL4.0ch06	3888044	3888244	SL4.0ch06:3888144	21	-488	Solyc06g009840.3.1	Fumarate hydratase class II (AHRD V3.3 *-* A0A2T1B859_9BURK)
Replicates 1_2	SL4.0ch12	66135968	66136168	SL4.0ch12:66136068	20.7	-489	Solyc12g099460.1.1	Unknown protein
Replicates 2_2	SL4.0ch00	627529	627729	SL4.0ch00:627629	114.9	-491	Solyc00g500014.1.1	Unknown protein
Replicates 2_2	SL4.0ch00	1594179	1594379	SL4.0ch00:1594279	37.7	-500	Solyc00g500089.1.1	Unknown protein
Replicates 2_1	SL4.0ch00	1594178	1594378	SL4.0ch00:1594278	37.9	-501	Solyc00g500089.1.1	Unknown protein
Replicates 2_3	SL4.0ch00	1594178	1594378	SL4.0ch00:1594278	38	-501	Solyc00g500089.1.1	Unknown protein
Replicates 2_3	SL4.0ch01	548117	548317	SL4.0ch01:548217	31	-513	Solyc01g005820.4.1	Serine/arginine-rich-splicing factor SCL30A (AHRD V3.3 *** A0A0M9UMR8_NICAT)
Replicates 2_2	SL4.0ch08	9515120	9515320	SL4.0ch08:9515220	518.8	-516	Solyc08g016796.1.1	Unknown protein
Replicates 2_1	SL4.0ch08	9515119	9515319	SL4.0ch08:9515219	518.2	-517	Solyc08g016796.1.1	Unknown protein
Replicates 2_3	SL4.0ch08	9515119	9515319	SL4.0ch08:9515219	518.2	-517	Solyc08g016796.1.1	Unknown protein
Replicates 2_2	SL4.0ch09	59820491	59820691	SL4.0ch09:59820591	29.1	-521	Solyc09g065565.1.1	NIMA-related kinase 2 (AHRD V3.3 --* AT3G04810.3)
Replicates 3_1	SL4.0ch02	46123816	46124016	SL4.0ch02:46123916	20	-523	Solyc02g085130.4.1	Tubby-like F-box protein (AHRD V3.3 *** A0A2G3D7T8_CAPCH)
Replicates 3_3	SL4.0ch12	66136002	66136202	SL4.0ch12:66136102	53	-523	Solyc12g099460.1.1	Unknown protein
Replicates 3_2	SL4.0ch03	60176020	60176220	SL4.0ch03:60176120	35.3	-524	Solyc03g116220.1.1	Unknown protein
Replicates 3_1	SL4.0ch03	60176030	60176230	SL4.0ch03:60176130	45	-534	Solyc03g116220.1.1	Unknown protein
Replicates 2_2	SL4.0ch00	530366	530566	SL4.0ch00:530466	32.1	-542	Solyc00g500008.1.1	Unknown protein
Replicates 1_1	SL4.0ch06	40821132	40821332	SL4.0ch06:40821232	19	-544	Solyc06g069440.3.1	Zinc finger transcription factor 45
Replicates 2_1	SL4.0ch03	55137154	55137354	SL4.0ch03:55137254	44	-550	Solyc03g098280.4.1	Argonaute 1b
Replicates 2_3	SL4.0ch03	55137154	55137354	SL4.0ch03:55137254	44	-550	Solyc03g098280.4.1	Argonaute 1b
Replicates 1_3	SL4.0ch03	55137151	55137351	SL4.0ch03:55137251	24	-553	Solyc03g098280.4.1	Argonaute 1b
Replicates 2_1	SL4.0ch00	5071138	5071338	SL4.0ch00:5071238	172	-553	Solyc00g019980.3.1	ribosomal protein L2 (chloroplast) (AHRD V3.11 *-* YP_009232109.1)
Replicates 3_2	SL4.0ch03	12650251	12650451	SL4.0ch03:12650351	27.3	-561	Solyc03g046592.1.1	Unknown protein
Replicates 3_3	SL4.0ch03	60176057	60176257	SL4.0ch03:60176157	34	-561	Solyc03g116220.1.1	Unknown protein
Replicates 3_3	SL4.0ch03	15228706	15228906	SL4.0ch03:15228806	19.4	-564	Solyc03g071700.1.1	Unknown protein
Replicates 2_1	SL4.0ch02	51405739	51405939	SL4.0ch02:51405839	31	-567	Solyc02g092220.1.1	Unknown protein
Replicates 2_2	SL4.0ch00	8475726	8475926	SL4.0ch00:8475826	59.5	-574	Solyc00g500368.1.1	Unknown protein
Replicates 2_1	SL4.0ch00	8475725	8475925	SL4.0ch00:8475825	59.4	-575	Solyc00g500368.1.1	Unknown protein
Replicates 2_3	SL4.0ch00	8475725	8475925	SL4.0ch00:8475825	59.7	-575	Solyc00g500368.1.1	Unknown protein
Replicates 1_1	SL4.0ch03	62940224	62940424	SL4.0ch03:62940324	29	-595	Solyc03g119980.3.1	Alpha/beta-Hydrolases superfamily protein (AHRD V3.3 *** O04083_ARATH)
Replicates 2_1	SL4.0ch04	21878885	21879085	SL4.0ch04:21878985	28	-607	Solyc04g025500.3.1	homeobox-leucine zipper protein HDG11-like (AHRD V3.3 *-* A0A2I4GYW1_9ROSI)
Replicates 3_3	SL4.0ch01	71506589	71506789	SL4.0ch01:71506689	19	-607	Solyc01g079790.5.1	Glucose-1-phosphate adenylyltransferase (AHRD V3.11 *** tr|K4AXM4|K4AXM4_SOLLC)
Replicates 2_1	SL4.0ch03	58100582	58100782	SL4.0ch03:58100682	27	-608	Solyc03g113590.3.1	5-formyltetrahydrofolate cycloligase
Replicates 2_2	SL4.0ch00	2894154	2894354	SL4.0ch00:2894254	34.2	-608	Solyc00g500162.1.1	Unknown protein
Replicates 2_1	SL4.0ch00	2894155	2894355	SL4.0ch00:2894255	34.2	-609	Solyc00g500162.1.1	Unknown protein
Replicates 2_3	SL4.0ch00	2894155	2894355	SL4.0ch00:2894255	34.2	-609	Solyc00g500162.1.1	Unknown protein
Replicates 1_1	SL4.0ch00	3520125	3520325	SL4.0ch00:3520225	28.1	-617	Solyc00g500178.1.1	Unknown protein
Replicates 2_2	SL4.0ch00	3520125	3520325	SL4.0ch00:3520225	114.3	-617	Solyc00g500178.1.1	Unknown protein
Replicates 3_2	SL4.0ch01	4474493	4474693	SL4.0ch01:4474593	22	-617	Solyc01g009900.3.1	Glutaredoxin (AHRD V3.3 *** A0A1R3H2Z3_COCAP)
Replicates 2_1	SL4.0ch00	3520124	3520324	SL4.0ch00:3520224	76.8	-618	Solyc00g500178.1.1	Unknown protein
Replicates 2_1	SL4.0ch03	62940247	62940447	SL4.0ch03:62940347	30	-618	Solyc03g119980.3.1	Alpha/beta-Hydrolases superfamily protein (AHRD V3.3 *** O04083_ARATH)
Replicates 2_3	SL4.0ch00	3520124	3520324	SL4.0ch00:3520224	76.9	-618	Solyc00g500178.1.1	Unknown protein
Replicates 2_3	SL4.0ch03	62940247	62940447	SL4.0ch03:62940347	30	-618	Solyc03g119980.3.1	Alpha/beta-Hydrolases superfamily protein (AHRD V3.3 *** O04083_ARATH)
Replicates 3_3	SL4.0ch01	4474492	4474692	SL4.0ch01:4474592	22	-618	Solyc01g009900.3.1	Glutaredoxin (AHRD V3.3 *** A0A1R3H2Z3_COCAP)
Replicates 3_1	SL4.0ch00	9253198	9253398	SL4.0ch00:9253298	25.3	-619	Solyc00g500402.1.1	Unknown protein
Replicates 3_2	SL4.0ch03	58100598	58100798	SL4.0ch03:58100698	32	-624	Solyc03g113590.3.1	5-formyltetrahydrofolate cycloligase
Replicates 3_3	SL4.0ch03	58100599	58100799	SL4.0ch03:58100699	32	-625	Solyc03g113590.3.1	5-formyltetrahydrofolate cycloligase
Replicates 2_3	SL4.0ch03	58100600	58100800	SL4.0ch03:58100700	26	-626	Solyc03g113590.3.1	5-formyltetrahydrofolate cycloligase
Replicates 1_1	SL4.0ch03	58100601	58100801	SL4.0ch03:58100701	25	-627	Solyc03g113590.3.1	5-formyltetrahydrofolate cycloligase
Replicates 1_3	SL4.0ch12	66136106	66136306	SL4.0ch12:66136206	28	-627	Solyc12g099460.1.1	Unknown protein
Replicates 2_2	SL4.0ch03	58100601	58100801	SL4.0ch03:58100701	26	-627	Solyc03g113590.3.1	5-formyltetrahydrofolate cycloligase
Replicates 1_3	SL4.0ch03	58100603	58100803	SL4.0ch03:58100703	25	-629	Solyc03g113590.3.1	5-formyltetrahydrofolate cycloligase
Replicates 2_2	SL4.0ch10	50178053	50178253	SL4.0ch10:50178153	28	-630	Solyc10g050910.1.1	Unknown protein
Replicates 1_2	SL4.0ch03	58100605	58100805	SL4.0ch03:58100705	25	-631	Solyc03g113590.3.1	5-formyltetrahydrofolate cycloligase
Replicates 2_3	SL4.0ch10	50178054	50178254	SL4.0ch10:50178154	28	-631	Solyc10g050910.1.1	Unknown protein
Replicates 3_2	SL4.0ch12	66136111	66136311	SL4.0ch12:66136211	20.9	-632	Solyc12g099460.1.1	Unknown protein
Replicates 2_1	SL4.0ch03	12650175	12650375	SL4.0ch03:12650275	58.2	-637	Solyc03g046592.1.1	Unknown protein
Replicates 2_3	SL4.0ch03	12650175	12650375	SL4.0ch03:12650275	58	-637	Solyc03g046592.1.1	Unknown protein
Replicates 2_2	SL4.0ch03	12650174	12650374	SL4.0ch03:12650274	57.6	-638	Solyc03g046592.1.1	Unknown protein
Replicates 3_3	SL4.0ch04	38796500	38796700	SL4.0ch04:38796600	26	-641	Solyc04g049090.3.1	SlMlo1
Replicates 3_2	SL4.0ch04	38796501	38796701	SL4.0ch04:38796601	26	-642	Solyc04g049090.3.1	SlMlo1
Replicates 3_1	SL4.0ch03	52731714	52731914	SL4.0ch03:52731814	21.7	-643	Solyc03g096220.3.1	tRNA-splicing endonuclease subunit (AHRD V3.3 *-* F4J8D6_ARATH)
Replicates 2_2	SL4.0ch06	8641850	8642050	SL4.0ch06:8641950	65.5	-644	Solyc06g150106.1.1	Unknown protein
Replicates 3_3	SL4.0ch03	52731709	52731909	SL4.0ch03:52731809	24	-648	Solyc03g096220.3.1	tRNA-splicing endonuclease subunit (AHRD V3.3 *-* F4J8D6_ARATH)
Replicates 2_3	SL4.0ch02	51405657	51405857	SL4.0ch02:51405757	33.5	-649	Solyc02g092220.1.1	Unknown protein
Replicates 3_2	SL4.0ch12	65072333	65072533	SL4.0ch12:65072433	20	-650	Solyc12g096780.2.1	Alcohol dehydrogenase superfamily (AHRD V3.3 *** A0A200R634_9MAGN)
Replicates 2_3	SL4.0ch00	9138714	9138914	SL4.0ch00:9138814	63.5	-653	Solyc00g500391.1.1	Unknown protein
Replicates 3_2	SL4.0ch07	64661438	64661638	SL4.0ch07:64661538	23	-658	Solyc07g061935.1.1	C2 domain-containing protein (AHRD V3.3 *-* A0A2G2Z4M9_CAPAN)
Replicates 3_3	SL4.0ch07	64661439	64661639	SL4.0ch07:64661539	23	-659	Solyc07g061935.1.1	C2 domain-containing protein (AHRD V3.3 *-* A0A2G2Z4M9_CAPAN)
Replicates 1_2	SL4.0ch03	62940289	62940489	SL4.0ch03:62940389	32	-660	Solyc03g119980.3.1	Alpha/beta-Hydrolases superfamily protein (AHRD V3.3 *** O04083_ARATH)
Replicates 2_1	SL4.0ch00	1594019	1594219	SL4.0ch00:1594119	39.8	-660	Solyc00g500089.1.1	Unknown protein
Replicates 1_3	SL4.0ch04	5028007	5028207	SL4.0ch04:5028107	21	-661	Solyc04g014740.3.1	Fumarylacetoacetase (AHRD V3.3 *** A0A1U8GL68_CAPAN)
Replicates 3_1	SL4.0ch03	58100635	58100835	SL4.0ch03:58100735	32	-661	Solyc03g113590.3.1	5-formyltetrahydrofolate cycloligase
Replicates 1_2	SL4.0ch01	1368462	1368662	SL4.0ch01:1368562	19.3	-663	Solyc01g006780.4.1	Unknown protein
Replicates 1_3	SL4.0ch01	1368464	1368664	SL4.0ch01:1368564	19	-665	Solyc01g006780.4.1	Unknown protein
Replicates 1_1	SL4.0ch01	1368469	1368669	SL4.0ch01:1368569	18.9	-670	Solyc01g006780.4.1	Unknown protein
Replicates 3_1	SL4.0ch00	5067147	5067347	SL4.0ch00:5067247	225	-675	Solyc00g020020.2.1	Unknown protein
Replicates 2_2	SL4.0ch00	5067150	5067350	SL4.0ch00:5067250	338.8	-678	Solyc00g020020.2.1	Unknown protein
Replicates 2_2	SL4.0ch00	3707925	3708125	SL4.0ch00:3708025	185	-680	Solyc00g500185.1.1	NADH dehydrogenase subunit 7 (AHRD V3.3 *** A0A0C5B9X5_9SOLA)
Replicates 2_2	SL4.0ch01	34863575	34863775	SL4.0ch01:34863675	104	-681	Solyc01g038232.1.1	Unknown protein
Replicates 2_1	SL4.0ch01	34863574	34863774	SL4.0ch01:34863674	104	-682	Solyc01g038232.1.1	Unknown protein
Replicates 2_3	SL4.0ch01	34863574	34863774	SL4.0ch01:34863674	104	-682	Solyc01g038232.1.1	Unknown protein
Replicates 2_2	SL4.0ch02	51325334	51325534	SL4.0ch02:51325434	30	-683	Solyc02g092080.2.1	60S ribosomal protein L23A (AHRD V3.3 *** A0A2G2XH92_CAPBA)
Replicates 2_1	SL4.0ch02	51325333	51325533	SL4.0ch02:51325433	30	-684	Solyc02g092080.2.1	60S ribosomal protein L23A (AHRD V3.3 *** A0A2G2XH92_CAPBA)
Replicates 2_3	SL4.0ch02	51325333	51325533	SL4.0ch02:51325433	30	-684	Solyc02g092080.2.1	60S ribosomal protein L23A (AHRD V3.3 *** A0A2G2XH92_CAPBA)
Replicates 3_2	SL4.0ch03	45985352	45985552	SL4.0ch03:45985452	25	-686	Solyc03g078780.3.1	UDP-glycosyltransferase 76C4-like (AHRD V3.3 *** A0A2I4EQP1_9ROSI)
Replicates 2_2	SL4.0ch02	41741509	41741709	SL4.0ch02:41741609	31	-687	Solyc02g079150.2.1	F-box family protein (AHRD V3.3 *** A0A2U1N101_ARTAN)
Replicates 1_1	SL4.0ch03	45985355	45985555	SL4.0ch03:45985455	33	-689	Solyc03g078780.3.1	UDP-glycosyltransferase 76C4-like (AHRD V3.3 *** A0A2I4EQP1_9ROSI)
Replicates 3_3	SL4.0ch03	45985356	45985556	SL4.0ch03:45985456	23.9	-690	Solyc03g078780.3.1	UDP-glycosyltransferase 76C4-like (AHRD V3.3 *** A0A2I4EQP1_9ROSI)
Replicates 1_1	SL4.0ch08	62997334	62997534	SL4.0ch08:62997434	23	-691	Solyc08g081960.3.1	Solanum Lycopersicum Cytokinin Response Factor 2
Replicates 3_2	SL4.0ch08	62997334	62997534	SL4.0ch08:62997434	24	-691	Solyc08g081960.3.1	Solanum Lycopersicum Cytokinin Response Factor 2
Replicates 1_2	SL4.0ch00	5067165	5067365	SL4.0ch00:5067265	133	-693	Solyc00g020020.2.1	Unknown protein
Replicates 1_3	SL4.0ch08	62997332	62997532	SL4.0ch08:62997432	22	-693	Solyc08g081960.3.1	Solanum Lycopersicum Cytokinin Response Factor 2
Replicates 2_1	SL4.0ch00	5067167	5067367	SL4.0ch00:5067267	314.6	-695	Solyc00g020020.2.1	Unknown protein
Replicates 3_2	SL4.0ch00	5067168	5067368	SL4.0ch00:5067268	227	-696	Solyc00g020020.2.1	Unknown protein
Replicates 3_3	SL4.0ch00	5067169	5067369	SL4.0ch00:5067269	176.4	-697	Solyc00g020020.2.1	Unknown protein
Replicates 3_1	SL4.0ch08	62997328	62997528	SL4.0ch08:62997428	25	-697	Solyc08g081960.3.1	Solanum Lycopersicum Cytokinin Response Factor 2
Replicates 1_2	SL4.0ch08	62997327	62997527	SL4.0ch08:62997427	22	-698	Solyc08g081960.3.1	Solanum Lycopersicum Cytokinin Response Factor 2
Replicates 2_3	SL4.0ch09	955043	955243	SL4.0ch09:955143	28.7	-698	Solyc09g007340.5.1	Tudor/PWWP/MBT superfamily protein (AHRD V3.11 *-* tr|Q9SF36|Q9SF36_ARATH)
Replicates 1_1	SL4.0ch00	5067171	5067371	SL4.0ch00:5067271	163.7	-699	Solyc00g020020.2.1	Unknown protein
Replicates 2_2	SL4.0ch09	955042	955242	SL4.0ch09:955142	28.7	-699	Solyc09g007340.5.1	Tudor/PWWP/MBT superfamily protein (AHRD V3.11 *-* tr|Q9SF36|Q9SF36_ARATH)
Replicates 2_3	SL4.0ch00	5067184	5067384	SL4.0ch00:5067284	312	-712	Solyc00g020020.2.1	Unknown protein
Replicates 1_3	SL4.0ch00	2894258	2894458	SL4.0ch00:2894358	18.6	-712	Solyc00g500162.1.1	Unknown protein
Replicates 3_2	SL4.0ch06	42801171	42801371	SL4.0ch06:42801271	25	-718	Solyc06g073250.1.1	Unknown protein
Replicates 3_3	SL4.0ch06	42801170	42801370	SL4.0ch06:42801270	25	-719	Solyc06g073250.1.1	Unknown protein
Replicates 3_1	SL4.0ch06	42801168	42801368	SL4.0ch06:42801268	25	-721	Solyc06g073250.1.1	Unknown protein
Replicates 3_1	SL4.0ch00	9253092	9253292	SL4.0ch00:9253192	90.7	-725	Solyc00g500402.1.1	Unknown protein
Replicates 3_1	SL4.0ch06	3554727	3554927	SL4.0ch06:3554827	24	-725	Solyc06g009580.1.1	NAD(P)H-quinone oxidoreductase subunit 2
Replicates 1_1	SL4.0ch00	9253089	9253289	SL4.0ch00:9253189	51.6	-728	Solyc00g500402.1.1	Unknown protein
Replicates 2_2	SL4.0ch00	9253089	9253289	SL4.0ch00:9253189	220.1	-728	Solyc00g500402.1.1	Unknown protein
Replicates 2_1	SL4.0ch00	9253088	9253288	SL4.0ch00:9253188	253.4	-729	Solyc00g500402.1.1	Unknown protein
Replicates 2_3	SL4.0ch00	9253088	9253288	SL4.0ch00:9253188	253.4	-729	Solyc00g500402.1.1	Unknown protein
Replicates 3_3	SL4.0ch00	9253087	9253287	SL4.0ch00:9253187	107.2	-730	Solyc00g500402.1.1	Unknown protein
Replicates 3_3	SL4.0ch06	3554722	3554922	SL4.0ch06:3554822	22	-730	Solyc06g009580.1.1	NAD(P)H-quinone oxidoreductase subunit 2
Replicates 3_2	SL4.0ch00	9253086	9253286	SL4.0ch00:9253186	103.3	-731	Solyc00g500402.1.1	Unknown protein
Replicates 1_1	SL4.0ch11	53619891	53620091	SL4.0ch11:53619991	31.6	-732	Solyc11g072350.1.1	CC-NBS-LRR type resistance-like protein (AHRD V3.3 *-* E3W9R6_CAPCH)
Replicates 2_3	SL4.0ch08	60068095	60068295	SL4.0ch08:60068195	27	-733	Solyc08g078120.2.1	Acyl-CoA N-acyltransferase with RING/FYVE/PHD-type zinc finger protein (AHRD V3.3 *-* A0A1P8B7I1_ARATH)
Replicates 1_3	SL4.0ch11	53619889	53620089	SL4.0ch11:53619989	26.4	-734	Solyc11g072350.1.1	CC-NBS-LRR type resistance-like protein (AHRD V3.3 *-* E3W9R6_CAPCH)
Replicates 1_2	SL4.0ch11	53619887	53620087	SL4.0ch11:53619987	27	-736	Solyc11g072350.1.1	CC-NBS-LRR type resistance-like protein (AHRD V3.3 *-* E3W9R6_CAPCH)
Replicates 3_3	SL4.0ch01	87160589	87160789	SL4.0ch01:87160689	21	-742	Solyc01g107210.4.1	transcriptional regulator of RNA polII%2C SAGA%2C subunit (AHRD V3.3 *-* AT4G33890.2)
Replicates 2_3	SL4.0ch12	64701956	64702156	SL4.0ch12:64702056	28	-750	Solyc12g096145.1.1	Unknown protein
Replicates 3_2	SL4.0ch06	3554702	3554902	SL4.0ch06:3554802	23	-750	Solyc06g009580.1.1	NAD(P)H-quinone oxidoreductase subunit 2
Replicates 2_1	SL4.0ch07	2562124	2562324	SL4.0ch07:2562224	28	-761	Solyc07g007930.3.1	Raffinose synthase family protein (AHRD V3.3 *** F4K470_ARATH)
Replicates 2_3	SL4.0ch07	2562124	2562324	SL4.0ch07:2562224	28	-761	Solyc07g007930.3.1	Raffinose synthase family protein (AHRD V3.3 *** F4K470_ARATH)
Replicates 3_2	SL4.0ch03	63293303	63293503	SL4.0ch03:63293403	19	-762	Solyc03g120460.5.1	tonoplast intrinsic protein 2.2
Replicates 2_2	SL4.0ch07	2562123	2562323	SL4.0ch07:2562223	28	-762	Solyc07g007930.3.1	Raffinose synthase family protein (AHRD V3.3 *** F4K470_ARATH)
Replicates 3_1	SL4.0ch02	40774004	40774204	SL4.0ch02:40774104	22	-763	Solyc02g077960.4.1	Dof zinc finger protein PBF (AHRD V3.11 *** tr|A0A2G3A8C7|A0A2G3A8C7_CAPAN)
Replicates 3_3	SL4.0ch02	40774006	40774206	SL4.0ch02:40774106	22	-765	Solyc02g077960.4.1	Dof zinc finger protein PBF (AHRD V3.11 *** tr|A0A2G3A8C7|A0A2G3A8C7_CAPAN)
Replicates 1_1	SL4.0ch02	40774007	40774207	SL4.0ch02:40774107	22	-766	Solyc02g077960.4.1	Dof zinc finger protein PBF (AHRD V3.11 *** tr|A0A2G3A8C7|A0A2G3A8C7_CAPAN)
Replicates 2_1	SL4.0ch02	40774008	40774208	SL4.0ch02:40774108	29	-767	Solyc02g077960.4.1	Dof zinc finger protein PBF (AHRD V3.11 *** tr|A0A2G3A8C7|A0A2G3A8C7_CAPAN)
Replicates 2_3	SL4.0ch02	40774008	40774208	SL4.0ch02:40774108	29	-767	Solyc02g077960.4.1	Dof zinc finger protein PBF (AHRD V3.11 *** tr|A0A2G3A8C7|A0A2G3A8C7_CAPAN)
Replicates 3_2	SL4.0ch01	87160564	87160764	SL4.0ch01:87160664	19	-767	Solyc01g107210.4.1	transcriptional regulator of RNA polII%2C SAGA%2C subunit (AHRD V3.3 *-* AT4G33890.2)
Replicates 1_3	SL4.0ch03	45985434	45985634	SL4.0ch03:45985534	34	-768	Solyc03g078780.3.1	UDP-glycosyltransferase 76C4-like (AHRD V3.3 *** A0A2I4EQP1_9ROSI)
Replicates 2_2	SL4.0ch02	40774016	40774216	SL4.0ch02:40774116	29	-775	Solyc02g077960.4.1	Dof zinc finger protein PBF (AHRD V3.11 *** tr|A0A2G3A8C7|A0A2G3A8C7_CAPAN)
Replicates 1_2	SL4.0ch03	45985444	45985644	SL4.0ch03:45985544	33	-778	Solyc03g078780.3.1	UDP-glycosyltransferase 76C4-like (AHRD V3.3 *** A0A2I4EQP1_9ROSI)
Replicates 1_3	SL4.0ch02	40774020	40774220	SL4.0ch02:40774120	19.5	-779	Solyc02g077960.4.1	Dof zinc finger protein PBF (AHRD V3.11 *** tr|A0A2G3A8C7|A0A2G3A8C7_CAPAN)
Replicates 2_2	SL4.0ch02	18740668	18740868	SL4.0ch02:18740768	36	-781	Solyc02g020920.1.1	Unknown protein
Replicates 2_1	SL4.0ch02	18740667	18740867	SL4.0ch02:18740767	36	-782	Solyc02g020920.1.1	Unknown protein
Replicates 2_3	SL4.0ch02	18740667	18740867	SL4.0ch02:18740767	36	-782	Solyc02g020920.1.1	Unknown protein
Replicates 1_2	SL4.0ch02	40774027	40774227	SL4.0ch02:40774127	25	-786	Solyc02g077960.4.1	Dof zinc finger protein PBF (AHRD V3.11 *** tr|A0A2G3A8C7|A0A2G3A8C7_CAPAN)
Replicates 2_2	SL4.0ch00	8475514	8475714	SL4.0ch00:8475614	27.3	-786	Solyc00g500368.1.1	Unknown protein
Replicates 2_1	SL4.0ch00	8475513	8475713	SL4.0ch00:8475613	27.3	-787	Solyc00g500368.1.1	Unknown protein
Replicates 1_2	SL4.0ch06	1199586	1199786	SL4.0ch06:1199686	31	-789	Solyc06g007130.5.1.1	omega-3 fatty acid desaturase -3
Replicates 3_1	SL4.0ch06	1199587	1199787	SL4.0ch06:1199687	25	-790	Solyc06g007130.5.1.1	omega-3 fatty acid desaturase -3
Replicates 1_3	SL4.0ch06	1199588	1199788	SL4.0ch06:1199688	31	-791	Solyc06g007130.5.1.1	omega-3 fatty acid desaturase -3
Replicates 3_1	SL4.0ch11	1114124	1114324	SL4.0ch11:1114224	31	-791	Solyc11g006360.1.1	E3 ubiquitin-protein ligase (AHRD V3.3 *-* AT3G19990.2)
Replicates 1_1	SL4.0ch06	1199590	1199790	SL4.0ch06:1199690	31	-793	Solyc06g007130.5.1.1	omega-3 fatty acid desaturase -3
Replicates 2_2	SL4.0ch06	1199590	1199790	SL4.0ch06:1199690	35	-793	Solyc06g007130.5.1.1	omega-3 fatty acid desaturase -3
Replicates 2_1	SL4.0ch06	1199591	1199791	SL4.0ch06:1199691	35	-794	Solyc06g007130.5.1.1	omega-3 fatty acid desaturase -3
Replicates 2_3	SL4.0ch06	1199591	1199791	SL4.0ch06:1199691	35	-794	Solyc06g007130.5.1.1	omega-3 fatty acid desaturase -3
Replicates 3_3	SL4.0ch06	1199592	1199792	SL4.0ch06:1199692	25	-795	Solyc06g007130.5.1.1	omega-3 fatty acid desaturase -3
Replicates 3_2	SL4.0ch06	1199593	1199793	SL4.0ch06:1199693	25	-796	Solyc06g007130.5.1.1	omega-3 fatty acid desaturase -3
Replicates 3_3	SL4.0ch11	1114135	1114335	SL4.0ch11:1114235	24.1	-802	Solyc11g006360.1.1	E3 ubiquitin-protein ligase (AHRD V3.3 *-* AT3G19990.2)
Replicates 3_2	SL4.0ch11	1114137	1114337	SL4.0ch11:1114237	26.8	-804	Solyc11g006360.1.1	E3 ubiquitin-protein ligase (AHRD V3.3 *-* AT3G19990.2)
Replicates 2_2	SL4.0ch00	9372909	9373109	SL4.0ch00:9373009	97	-811	Solyc00g500404.1.1	Unknown protein
Replicates 2_1	SL4.0ch00	9372910	9373110	SL4.0ch00:9373010	98	-812	Solyc00g500404.1.1	Unknown protein
Replicates 2_3	SL4.0ch00	9372910	9373110	SL4.0ch00:9373010	98	-812	Solyc00g500404.1.1	Unknown protein
Replicates 2_2	SL4.0ch11	1114151	1114351	SL4.0ch11:1114251	37	-818	Solyc11g006360.1.1	E3 ubiquitin-protein ligase (AHRD V3.3 *-* AT3G19990.2)
Replicates 2_1	SL4.0ch11	1114152	1114352	SL4.0ch11:1114252	37	-819	Solyc11g006360.1.1	E3 ubiquitin-protein ligase (AHRD V3.3 *-* AT3G19990.2)
Replicates 2_3	SL4.0ch11	1114152	1114352	SL4.0ch11:1114252	37	-819	Solyc11g006360.1.1	E3 ubiquitin-protein ligase (AHRD V3.3 *-* AT3G19990.2)
Replicates 2_2	SL4.0ch00	1593859	1594059	SL4.0ch00:1593959	29.5	-820	Solyc00g500089.1.1	Unknown protein
Replicates 3_1	SL4.0ch07	58809796	58809996	SL4.0ch07:58809896	26	-820	Solyc07g047690.1.1	DnaJ domain-containing protein (AHRD V3.3 *** A0A2U1M065_ARTAN)
Replicates 2_1	SL4.0ch00	1593858	1594058	SL4.0ch00:1593958	29.3	-821	Solyc00g500089.1.1	Unknown protein
Replicates 2_3	SL4.0ch00	1593858	1594058	SL4.0ch00:1593958	29.1	-821	Solyc00g500089.1.1	Unknown protein
Replicates 2_2	SL4.0ch07	58809793	58809993	SL4.0ch07:58809893	26	-823	Solyc07g047690.1.1	DnaJ domain-containing protein (AHRD V3.3 *** A0A2U1M065_ARTAN)
Replicates 3_3	SL4.0ch07	58809791	58809991	SL4.0ch07:58809891	26	-825	Solyc07g047690.1.1	DnaJ domain-containing protein (AHRD V3.3 *** A0A2U1M065_ARTAN)
Replicates 3_2	SL4.0ch07	58809779	58809979	SL4.0ch07:58809879	26	-837	Solyc07g047690.1.1	DnaJ domain-containing protein (AHRD V3.3 *** A0A2U1M065_ARTAN)
Replicates 2_1	SL4.0ch02	9491086	9491286	SL4.0ch02:9491186	31.7	-838	Solyc02g005570.1.1	Unknown protein
Replicates 1_3	SL4.0ch00	3712925	3713125	SL4.0ch00:3713025	79	-871	Solyc00g014810.1.1	Unknown protein
Replicates 1_1	SL4.0ch00	3712924	3713124	SL4.0ch00:3713024	80	-872	Solyc00g014810.1.1	Unknown protein
Replicates 1_1	SL4.0ch09	67459070	67459270	SL4.0ch09:67459170	34	-879	Solyc09g092220.3.1	magnesium transporter NIPA (DUF803) (AHRD V3.3 *** AT4G13800.8)
Replicates 1_3	SL4.0ch09	67459072	67459272	SL4.0ch09:67459172	34	-881	Solyc09g092220.3.1	magnesium transporter NIPA (DUF803) (AHRD V3.3 *** AT4G13800.8)
Replicates 1_2	SL4.0ch09	67459074	67459274	SL4.0ch09:67459174	34	-883	Solyc09g092220.3.1	magnesium transporter NIPA (DUF803) (AHRD V3.3 *** AT4G13800.8)
Replicates 2_2	SL4.0ch03	3023367	3023567	SL4.0ch03:3023467	30	-890	Solyc03g025640.2.1	Cytochrome P450 (AHRD V3.3 *** I6YHZ8_LINUS)
Replicates 2_1	SL4.0ch03	3023368	3023568	SL4.0ch03:3023468	30	-891	Solyc03g025640.2.1	Cytochrome P450 (AHRD V3.3 *** I6YHZ8_LINUS)
Replicates 1_2	SL4.0ch08	9500988	9501188	SL4.0ch08:9501088	114	-896	Solyc08g016794.1.1	Unknown protein
Replicates 3_1	SL4.0ch08	9500987	9501187	SL4.0ch08:9501087	124.1	-897	Solyc08g016794.1.1	Unknown protein
Replicates 3_2	SL4.0ch11	53619725	53619925	SL4.0ch11:53619825	31.1	-898	Solyc11g072350.1.1	CC-NBS-LRR type resistance-like protein (AHRD V3.3 *-* E3W9R6_CAPCH)
Replicates 3_3	SL4.0ch11	53619724	53619924	SL4.0ch11:53619824	31.6	-899	Solyc11g072350.1.1	CC-NBS-LRR type resistance-like protein (AHRD V3.3 *-* E3W9R6_CAPCH)
Replicates 1_1	SL4.0ch08	9500984	9501184	SL4.0ch08:9501084	115.7	-900	Solyc08g016794.1.1	Unknown protein
Replicates 3_1	SL4.0ch11	53619722	53619922	SL4.0ch11:53619822	31.6	-901	Solyc11g072350.1.1	CC-NBS-LRR type resistance-like protein (AHRD V3.3 *-* E3W9R6_CAPCH)
Replicates 3_2	SL4.0ch08	9500981	9501181	SL4.0ch08:9501081	139	-903	Solyc08g016794.1.1	Unknown protein
Replicates 3_1	SL4.0ch08	9506925	9507125	SL4.0ch08:9507025	127	-915	Solyc08g150110.1.1	Unknown protein
Replicates 2_2	SL4.0ch08	9506922	9507122	SL4.0ch08:9507022	459	-918	Solyc08g150110.1.1	Unknown protein
Replicates 1_3	SL4.0ch05	65041978	65042178	SL4.0ch05:65042078	22	-919	Solyc05g056320.3.1	Smr (Small MutS-related) domain protein (AHRD V3.3 *** A0A2K3NNB3_TRIPR)
Replicates 2_1	SL4.0ch08	9506921	9507121	SL4.0ch08:9507021	457	-919	Solyc08g150110.1.1	Unknown protein
Replicates 2_3	SL4.0ch08	9506921	9507121	SL4.0ch08:9507021	457	-919	Solyc08g150110.1.1	Unknown protein
Replicates 1_1	SL4.0ch06	10937964	10938164	SL4.0ch06:10938064	18.2	-922	Solyc06g016685.1.1	Unknown protein
Replicates 1_1	SL4.0ch05	65041983	65042183	SL4.0ch05:65042083	22	-924	Solyc05g056320.3.1	Smr (Small MutS-related) domain protein (AHRD V3.3 *** A0A2K3NNB3_TRIPR)
Replicates 3_2	SL4.0ch01	113463	113663	SL4.0ch01:113563	27	-941	Solyc01g005110.3.1	Dolichol-phosphate mannosyltransferase-related protein (AHRD V3.3 *** A0A2U1LCX2_ARTAN)
Replicates 2_2	SL4.0ch01	113460	113660	SL4.0ch01:113560	27.8	-944	Solyc01g005110.3.1	Dolichol-phosphate mannosyltransferase-related protein (AHRD V3.3 *** A0A2U1LCX2_ARTAN)
Replicates 2_3	SL4.0ch02	46394139	46394339	SL4.0ch02:46394239	31	-958	Solyc02g085520.4.1	Pentatricopeptide repeat-containing protein
Replicates 3_1	SL4.0ch03	3023437	3023637	SL4.0ch03:3023537	19	-960	Solyc03g025640.2.1	Cytochrome P450 (AHRD V3.3 *** I6YHZ8_LINUS)
Replicates 2_2	SL4.0ch08	9500889	9501089	SL4.0ch08:9500989	380.7	-995	Solyc08g016794.1.1	Unknown protein
Replicates 2_2	SL4.0ch01	78231274	78231474	SL4.0ch01:78231374	28	-996	Solyc01g094530.4.1	Small nuclear ribonucleoprotein-associated protein (AHRD V3.3 *-* A0A2G3BT11_CAPCH)
Replicates 2_1	SL4.0ch01	78231275	78231475	SL4.0ch01:78231375	28	-997	Solyc01g094530.4.1	Small nuclear ribonucleoprotein-associated protein (AHRD V3.3 *-* A0A2G3BT11_CAPCH)
Replicates 2_3	SL4.0ch01	78231275	78231475	SL4.0ch01:78231375	28	-997	Solyc01g094530.4.1	Small nuclear ribonucleoprotein-associated protein (AHRD V3.3 *-* A0A2G3BT11_CAPCH)
Replicates 2_1	SL4.0ch00	6119260	6119460	SL4.0ch00:6119360	91.9	-997	Solyc00g500264.1.1	Unknown protein
Replicates 2_2	SL4.0ch11	51995161	51995361	SL4.0ch11:51995261	28	-999	Solyc11g069320.1.1	F-box/kelch-repeat protein (AHRD V3.3 *** A0A1J3IN02_NOCCA)
Replicates 2_2	SL4.0ch04	12315512	12315712	SL4.0ch04:12315612	60.5	-1007	Solyc04g039775.1.1	Unknown protein
Replicates 2_1	SL4.0ch04	12315513	12315713	SL4.0ch04:12315613	60.1	-1008	Solyc04g039775.1.1	Unknown protein
Replicates 2_3	SL4.0ch04	12315513	12315713	SL4.0ch04:12315613	60.4	-1008	Solyc04g039775.1.1	Unknown protein
Replicates 3_2	SL4.0ch07	49544350	49544550	SL4.0ch07:49544450	21	-1013	Solyc07g040780.5.1	WD40 repeat (AHRD V3.11 *** tr|A0A200QDF0|A0A200QDF0_9MAGN)
Replicates 2_1	SL4.0ch11	51995146	51995346	SL4.0ch11:51995246	28	-1014	Solyc11g069320.1.1	F-box/kelch-repeat protein (AHRD V3.3 *** A0A1J3IN02_NOCCA)
Replicates 2_2	SL4.0ch07	6444461	6444661	SL4.0ch07:6444561	37	-1018	Solyc07g016150.4.1	ripening regulated protein DDTFR10
Replicates 2_1	SL4.0ch07	6444460	6444660	SL4.0ch07:6444560	37	-1019	Solyc07g016150.4.1	ripening regulated protein DDTFR10
Replicates 2_3	SL4.0ch07	6444460	6444660	SL4.0ch07:6444560	37	-1019	Solyc07g016150.4.1	ripening regulated protein DDTFR10
Replicates 2_1	SL4.0ch02	40973841	40974041	SL4.0ch02:40973941	31	-1021	Solyc02g078230.2.1	Callose synthase 12 (AHRD V3.3 *** A0A2G3D663_CAPCH)
Replicates 2_3	SL4.0ch02	40973841	40974041	SL4.0ch02:40973941	31	-1021	Solyc02g078230.2.1	Callose synthase 12 (AHRD V3.3 *** A0A2G3D663_CAPCH)
Replicates 2_3	SL4.0ch10	851214	851414	SL4.0ch10:851314	32	-1025	Solyc10g006320.3.1	Vacuolar protein sorting-associated protein (AHRD V3.3 *** A0A2G2VR43_CAPBA)
Replicates 3_2	SL4.0ch12	7445686	7445886	SL4.0ch12:7445786	19	-1025	Solyc12g017790.1.1	mitogen-activated protein kinase kinase kinase 2-like (AHRD V3.3 *-* A0A2I4FL67_9ROSI)
Replicates 2_2	SL4.0ch10	851215	851415	SL4.0ch10:851315	32	-1026	Solyc10g006320.3.1	Vacuolar protein sorting-associated protein (AHRD V3.3 *** A0A2G2VR43_CAPBA)
Replicates 3_3	SL4.0ch10	851216	851416	SL4.0ch10:851316	35	-1027	Solyc10g006320.3.1	Vacuolar protein sorting-associated protein (AHRD V3.3 *** A0A2G2VR43_CAPBA)
Replicates 1_3	SL4.0ch10	851217	851417	SL4.0ch10:851317	25	-1028	Solyc10g006320.3.1	Vacuolar protein sorting-associated protein (AHRD V3.3 *** A0A2G2VR43_CAPBA)
Replicates 1_1	SL4.0ch10	851218	851418	SL4.0ch10:851318	25	-1029	Solyc10g006320.3.1	Vacuolar protein sorting-associated protein (AHRD V3.3 *** A0A2G2VR43_CAPBA)
Replicates 3_2	SL4.0ch10	851218	851418	SL4.0ch10:851318	35	-1029	Solyc10g006320.3.1	Vacuolar protein sorting-associated protein (AHRD V3.3 *** A0A2G2VR43_CAPBA)
Replicates 1_2	SL4.0ch10	851219	851419	SL4.0ch10:851319	25	-1030	Solyc10g006320.3.1	Vacuolar protein sorting-associated protein (AHRD V3.3 *** A0A2G2VR43_CAPBA)
Replicates 2_2	SL4.0ch12	5676563	5676763	SL4.0ch12:5676663	32	-1031	Solyc12g015650.3.1	RING-type E3 ubiquitin transferase (AHRD V3.3 *-* K3XEM9_SETIT)
Replicates 3_3	SL4.0ch00	9075368	9075568	SL4.0ch00:9075468	35.1	-1031	Solyc00g500384.1.1	Unknown protein
Replicates 3_1	SL4.0ch10	851221	851421	SL4.0ch10:851321	35	-1032	Solyc10g006320.3.1	Vacuolar protein sorting-associated protein (AHRD V3.3 *** A0A2G2VR43_CAPBA)
Replicates 3_2	SL4.0ch00	9075369	9075569	SL4.0ch00:9075469	40	-1032	Solyc00g500384.1.1	Unknown protein
Replicates 2_2	SL4.0ch08	57842090	57842290	SL4.0ch08:57842190	26.3	-1036	Solyc08g075560.1.1	Unknown protein
Replicates 2_1	SL4.0ch08	9568566	9568766	SL4.0ch08:9568666	50.6	-1038	Solyc08g150111.1.1	Unknown protein
Replicates 2_1	SL4.0ch10	457435	457635	SL4.0ch10:457535	26	-1072	Solyc10g005710.2.1	hypothetical protein (AHRD V3.3 *** AT4G26450.2)
Replicates 2_1	SL4.0ch06	24033528	24033728	SL4.0ch06:24033628	26	-1078	Solyc06g160670.1.1	zinc finger BED domain-containing protein RICESLEEPER 2-like (AHRD V3.11 *-* tr|A0A2I4EGG2|A0A2I4EGG2_9ROSI)
Replicates 2_1	SL4.0ch06	40470848	40471048	SL4.0ch06:40470948	26	-1101	Solyc06g069030.3.1	microbial collagenase (AHRD V3.3 *** AT1G18060.1)
Replicates 2_1	SL4.0ch08	57842158	57842358	SL4.0ch08:57842258	29.5	-1104	Solyc08g075560.1.1	Unknown protein
Replicates 2_3	SL4.0ch08	57842158	57842358	SL4.0ch08:57842258	29.5	-1104	Solyc08g075560.1.1	Unknown protein
Replicates 1_2	SL4.0ch06	46128562	46128762	SL4.0ch06:46128662	25	-1119	Solyc06g082930.3.1	FRIGIDA-like protein (AHRD V3.3 *** A0A2G3CBV4_CAPCH)
Replicates 1_3	SL4.0ch06	46128560	46128760	SL4.0ch06:46128660	25	-1121	Solyc06g082930.3.1	FRIGIDA-like protein (AHRD V3.3 *** A0A2G3CBV4_CAPCH)
Replicates 1_1	SL4.0ch06	46128558	46128758	SL4.0ch06:46128658	25	-1123	Solyc06g082930.3.1	FRIGIDA-like protein (AHRD V3.3 *** A0A2G3CBV4_CAPCH)
Replicates 2_2	SL4.0ch06	46128558	46128758	SL4.0ch06:46128658	43	-1123	Solyc06g082930.3.1	FRIGIDA-like protein (AHRD V3.3 *** A0A2G3CBV4_CAPCH)
Replicates 2_1	SL4.0ch06	46128557	46128757	SL4.0ch06:46128657	43	-1124	Solyc06g082930.3.1	FRIGIDA-like protein (AHRD V3.3 *** A0A2G3CBV4_CAPCH)
Replicates 2_3	SL4.0ch06	46128557	46128757	SL4.0ch06:46128657	43	-1124	Solyc06g082930.3.1	FRIGIDA-like protein (AHRD V3.3 *** A0A2G3CBV4_CAPCH)
Replicates 2_2	SL4.0ch08	9413034	9413234	SL4.0ch08:9413134	166.1	-1141	Solyc08g016792.1.1	Unknown protein
Replicates 3_3	SL4.0ch02	22724769	22724969	SL4.0ch02:22724869	46	-1154	Solyc02g022860.1.1	FAD-binding Berberine family protein (AHRD V3.3 *** A0A2U1MQE5_ARTAN)
Replicates 1_1	SL4.0ch02	51693612	51693812	SL4.0ch02:51693712	18	-1155	Solyc02g092590.3.1	glycosyltransferase-like protein (AHRD V3.3 *-* AT5G67390.3)
Replicates 2_2	SL4.0ch01	8197864	8198064	SL4.0ch01:8197964	29	-1156	Solyc01g011230.3.1	Eukaryotic aspartyl protease family protein (AHRD V3.3 *-* Q0WQ50_ARATH)
Replicates 2_1	SL4.0ch02	46175538	46175738	SL4.0ch02:46175638	34	-1157	Solyc02g085180.5.1.1	alpha/beta fold family protein
Replicates 1_3	SL4.0ch02	22724765	22724965	SL4.0ch02:22724865	29	-1158	Solyc02g022860.1.1	FAD-binding Berberine family protein (AHRD V3.3 *** A0A2U1MQE5_ARTAN)
Replicates 1_3	SL4.0ch01	8197866	8198066	SL4.0ch01:8197966	19	-1158	Solyc01g011230.3.1	Eukaryotic aspartyl protease family protein (AHRD V3.3 *-* Q0WQ50_ARATH)
Replicates 2_1	SL4.0ch02	22724765	22724965	SL4.0ch02:22724865	50	-1158	Solyc02g022860.1.1	FAD-binding Berberine family protein (AHRD V3.3 *** A0A2U1MQE5_ARTAN)
Replicates 2_3	SL4.0ch02	22724765	22724965	SL4.0ch02:22724865	50	-1158	Solyc02g022860.1.1	FAD-binding Berberine family protein (AHRD V3.3 *** A0A2U1MQE5_ARTAN)
Replicates 1_1	SL4.0ch02	22724764	22724964	SL4.0ch02:22724864	29	-1159	Solyc02g022860.1.1	FAD-binding Berberine family protein (AHRD V3.3 *** A0A2U1MQE5_ARTAN)
Replicates 2_2	SL4.0ch02	22724764	22724964	SL4.0ch02:22724864	50	-1159	Solyc02g022860.1.1	FAD-binding Berberine family protein (AHRD V3.3 *** A0A2U1MQE5_ARTAN)
Replicates 3_2	SL4.0ch02	22724764	22724964	SL4.0ch02:22724864	45	-1159	Solyc02g022860.1.1	FAD-binding Berberine family protein (AHRD V3.3 *** A0A2U1MQE5_ARTAN)
Replicates 1_3	SL4.0ch07	97133	97333	SL4.0ch07:97233	21	-1161	Solyc07g005080.1.1	Glycosyl hydrolase family protein with chitinase insertion domain-containing protein (AHRD V3.3 *** A0A2U1N1A8_ARTAN)
Replicates 3_1	SL4.0ch02	22724761	22724961	SL4.0ch02:22724861	45	-1162	Solyc02g022860.1.1	FAD-binding Berberine family protein (AHRD V3.3 *** A0A2U1MQE5_ARTAN)
Replicates 1_2	SL4.0ch02	22724760	22724960	SL4.0ch02:22724860	29	-1163	Solyc02g022860.1.1	FAD-binding Berberine family protein (AHRD V3.3 *** A0A2U1MQE5_ARTAN)
Replicates 2_1	SL4.0ch08	9412980	9413180	SL4.0ch08:9413080	118.6	-1195	Solyc08g016792.1.1	Unknown protein
Replicates 2_3	SL4.0ch08	9412980	9413180	SL4.0ch08:9413080	117.7	-1195	Solyc08g016792.1.1	Unknown protein
Replicates 1_2	SL4.0ch02	50471058	50471258	SL4.0ch02:50471158	21	-1200	Solyc02g090980.1.1	MAP kinase kinase kinase 22
Replicates 1_3	SL4.0ch02	50471056	50471256	SL4.0ch02:50471156	21	-1202	Solyc02g090980.1.1	MAP kinase kinase kinase 22
Replicates 2_2	SL4.0ch00	8475094	8475294	SL4.0ch00:8475194	31.4	-1206	Solyc00g500368.1.1	Unknown protein
Replicates 3_3	SL4.0ch02	50471052	50471252	SL4.0ch02:50471152	31	-1206	Solyc02g090980.1.1	MAP kinase kinase kinase 22
Replicates 2_3	SL4.0ch00	8475093	8475293	SL4.0ch00:8475193	31.5	-1207	Solyc00g500368.1.1	Unknown protein
Replicates 3_2	SL4.0ch02	50471051	50471251	SL4.0ch02:50471151	31	-1207	Solyc02g090980.1.1	MAP kinase kinase kinase 22
Replicates 1_2	SL4.0ch08	9514427	9514627	SL4.0ch08:9514527	131.8	-1209	Solyc08g016796.1.1	Unknown protein
Replicates 1_1	SL4.0ch08	9514423	9514623	SL4.0ch08:9514523	172	-1213	Solyc08g016796.1.1	Unknown protein
Replicates 3_1	SL4.0ch08	9568364	9568564	SL4.0ch08:9568464	68.4	-1240	Solyc08g150111.1.1	Unknown protein
Replicates 1_3	SL4.0ch08	9568363	9568563	SL4.0ch08:9568463	60.6	-1241	Solyc08g150111.1.1	Unknown protein
Replicates 2_1	SL4.0ch07	12269862	12270062	SL4.0ch07:12269962	26	-1241	Solyc07g019570.1.1	Unknown protein
Replicates 2_2	SL4.0ch08	9568361	9568561	SL4.0ch08:9568461	246.2	-1243	Solyc08g150111.1.1	Unknown protein
Replicates 2_1	SL4.0ch08	9568360	9568560	SL4.0ch08:9568460	181.7	-1244	Solyc08g150111.1.1	Unknown protein
Replicates 2_3	SL4.0ch08	9568360	9568560	SL4.0ch08:9568460	243.6	-1244	Solyc08g150111.1.1	Unknown protein
Replicates 3_3	SL4.0ch08	9568359	9568559	SL4.0ch08:9568459	69.8	-1245	Solyc08g150111.1.1	Unknown protein
Replicates 1_3	SL4.0ch06	21160168	21160368	SL4.0ch06:21160268	18	-1246	Solyc06g033920.1.1	I-7-like protein (AHRD V3.3 *** A0A0K0VHQ1_SOLPN)
Replicates 3_3	SL4.0ch03	64710038	64710238	SL4.0ch03:64710138	21	-1260	Solyc03g123370.3.1	GTP pyrophosphokinase
Replicates 1_1	SL4.0ch03	6260926	6261126	SL4.0ch03:6261026	20	-1265	Solyc03g150107.2.1	Eukaryotic translation initiation factor 5 (AHRD V3.11 *** tr|A0A2G2VCU5|A0A2G2VCU5_CAPBA)
Replicates 2_3	SL4.0ch06	41927071	41927271	SL4.0ch06:41927171	26	-1275	Solyc06g071850.3.1	Tetratricopeptide repeat (TPR)-containing protein (AHRD V3.3 *** Q67YJ9_ARATH)
Replicates 3_1	SL4.0ch08	57842333	57842533	SL4.0ch08:57842433	25	-1279	Solyc08g075560.1.1	Unknown protein
Replicates 3_2	SL4.0ch02	50978046	50978246	SL4.0ch02:50978146	21	-1284	Solyc02g091700.3.1	Hydroxyproline-rich glycoprotein (AHRD V3.3 *** A0A2K3L507_TRIPR)
Replicates 3_3	SL4.0ch08	57842338	57842538	SL4.0ch08:57842438	25	-1284	Solyc08g075560.1.1	Unknown protein
Replicates 3_2	SL4.0ch08	57842339	57842539	SL4.0ch08:57842439	25	-1285	Solyc08g075560.1.1	Unknown protein
Replicates 3_1	SL4.0ch02	50978049	50978249	SL4.0ch02:50978149	19	-1287	Solyc02g091700.3.1	Hydroxyproline-rich glycoprotein (AHRD V3.3 *** A0A2K3L507_TRIPR)
Replicates 3_3	SL4.0ch02	50978050	50978250	SL4.0ch02:50978150	19.2	-1288	Solyc02g091700.3.1	Hydroxyproline-rich glycoprotein (AHRD V3.3 *** A0A2K3L507_TRIPR)
Replicates 2_1	SL4.0ch02	50978051	50978251	SL4.0ch02:50978151	40	-1289	Solyc02g091700.3.1	Hydroxyproline-rich glycoprotein (AHRD V3.3 *** A0A2K3L507_TRIPR)
Replicates 2_3	SL4.0ch02	50978051	50978251	SL4.0ch02:50978151	40	-1289	Solyc02g091700.3.1	Hydroxyproline-rich glycoprotein (AHRD V3.3 *** A0A2K3L507_TRIPR)
Replicates 2_2	SL4.0ch02	50978052	50978252	SL4.0ch02:50978152	40	-1290	Solyc02g091700.3.1	Hydroxyproline-rich glycoprotein (AHRD V3.3 *** A0A2K3L507_TRIPR)
Replicates 3_1	SL4.0ch05	7879220	7879420	SL4.0ch05:7879320	28	-1294	Solyc05g014120.1.1	S-adenosyl-L-methionine-dependent methyltransferases superfamily protein (AHRD V3.3 *** A0A2U1MVU3_ARTAN)
Replicates 3_3	SL4.0ch05	7879215	7879415	SL4.0ch05:7879315	28	-1299	Solyc05g014120.1.1	S-adenosyl-L-methionine-dependent methyltransferases superfamily protein (AHRD V3.3 *** A0A2U1MVU3_ARTAN)
Replicates 3_2	SL4.0ch05	7879214	7879414	SL4.0ch05:7879314	29	-1300	Solyc05g014120.1.1	S-adenosyl-L-methionine-dependent methyltransferases superfamily protein (AHRD V3.3 *** A0A2U1MVU3_ARTAN)
Replicates 2_2	SL4.0ch12	4892929	4893129	SL4.0ch12:4893029	35.6	-1308	Solyc12g014020.2.1	Nucleic acid-binding%2C OB-fold-like protein (AHRD V3.3 *** AT5G63690.2)
Replicates 1_1	SL4.0ch00	9139392	9139592	SL4.0ch00:9139492	29.7	-1331	Solyc00g500391.1.1	Unknown protein
Replicates 1_3	SL4.0ch03	1850412	1850612	SL4.0ch03:1850512	18	-1349	Solyc03g007260.3.1	Cyclic nucleotide-gated ion channel 1 (AHRD V3.3 *** A0A2G2X7E9_CAPBA)
Replicates 1_1	SL4.0ch03	1850414	1850614	SL4.0ch03:1850514	18	-1351	Solyc03g007260.3.1	Cyclic nucleotide-gated ion channel 1 (AHRD V3.3 *** A0A2G2X7E9_CAPBA)
Replicates 1_3	SL4.0ch02	43284861	43285061	SL4.0ch02:43284961	19	-1351	Solyc02g081270.4.1	NAC domain-containing protein 53 (AHRD V3.3 *** A0A2G2XFS7_CAPBA)
Replicates 2_3	SL4.0ch12	4892972	4893172	SL4.0ch12:4893072	28.8	-1351	Solyc12g014020.2.1	Nucleic acid-binding%2C OB-fold-like protein (AHRD V3.3 *** AT5G63690.2)
Replicates 2_3	SL4.0ch07	63861960	63862160	SL4.0ch07:63862060	28	-1352	Solyc07g056050.1.1	Transmembrane 9 superfamily member (AHRD V3.3 *** A0A2G2Z4P1_CAPAN)
Replicates 3_2	SL4.0ch07	63861959	63862159	SL4.0ch07:63862059	22	-1353	Solyc07g056050.1.1	Transmembrane 9 superfamily member (AHRD V3.3 *** A0A2G2Z4P1_CAPAN)
Replicates 1_2	SL4.0ch07	63861955	63862155	SL4.0ch07:63862055	20	-1357	Solyc07g056050.1.1	Transmembrane 9 superfamily member (AHRD V3.3 *** A0A2G2Z4P1_CAPAN)
Replicates 1_3	SL4.0ch07	63861954	63862154	SL4.0ch07:63862054	20	-1358	Solyc07g056050.1.1	Transmembrane 9 superfamily member (AHRD V3.3 *** A0A2G2Z4P1_CAPAN)
Replicates 1_1	SL4.0ch00	9235386	9235586	SL4.0ch00:9235486	37.4	-1359	Solyc00g500399.1.1	Unknown protein
Replicates 2_1	SL4.0ch00	6119630	6119830	SL4.0ch00:6119730	85.3	-1367	Solyc00g500264.1.1	Unknown protein
Replicates 2_3	SL4.0ch02	45563562	45563762	SL4.0ch02:45563662	57	-1374	Solyc02g084480.3.1	golgin candidate 6-like isoform X2 (AHRD V3.3 *-* XP_025885295.1)
Replicates 2_1	SL4.0ch08	9568201	9568401	SL4.0ch08:9568301	78.1	-1403	Solyc08g150111.1.1	Unknown protein
Replicates 3_2	SL4.0ch02	38385484	38385684	SL4.0ch02:38385584	20	-1408	Solyc02g070740.1.1	Unknown protein
Replicates 2_2	SL4.0ch00	496423	496623	SL4.0ch00:496523	371	-1418	Solyc00g500007.1.1	Unknown protein
Replicates 2_1	SL4.0ch00	496422	496622	SL4.0ch00:496522	371	-1419	Solyc00g500007.1.1	Unknown protein
Replicates 2_3	SL4.0ch00	496422	496622	SL4.0ch00:496522	371	-1419	Solyc00g500007.1.1	Unknown protein
Replicates 3_1	SL4.0ch02	52573232	52573432	SL4.0ch02:52573332	24	-1455	Solyc02g093750.3.1	C3H4 type zinc finger protein (DUF23) (AHRD V3.3 *** Q9FM26_ARATH)
Replicates 3_2	SL4.0ch02	52573221	52573421	SL4.0ch02:52573321	20.1	-1466	Solyc02g093750.3.1	C3H4 type zinc finger protein (DUF23) (AHRD V3.3 *** Q9FM26_ARATH)
Replicates 2_2	SL4.0ch00	8474832	8475032	SL4.0ch00:8474932	50.6	-1468	Solyc00g500368.1.1	Unknown protein
Replicates 2_1	SL4.0ch00	8474831	8475031	SL4.0ch00:8474931	51	-1469	Solyc00g500368.1.1	Unknown protein
Replicates 2_3	SL4.0ch00	8474831	8475031	SL4.0ch00:8474931	50.5	-1469	Solyc00g500368.1.1	Unknown protein
Replicates 1_2	SL4.0ch00	9139547	9139747	SL4.0ch00:9139647	94	-1486	Solyc00g500391.1.1	Unknown protein
Replicates 1_1	SL4.0ch00	9139551	9139751	SL4.0ch00:9139651	39.4	-1490	Solyc00g500391.1.1	Unknown protein
Replicates 2_2	SL4.0ch00	9139551	9139751	SL4.0ch00:9139651	304	-1490	Solyc00g500391.1.1	Unknown protein
Replicates 2_1	SL4.0ch00	9139552	9139752	SL4.0ch00:9139652	303	-1491	Solyc00g500391.1.1	Unknown protein
Replicates 2_3	SL4.0ch00	9139552	9139752	SL4.0ch00:9139652	303	-1491	Solyc00g500391.1.1	Unknown protein
Replicates 1_1	SL4.0ch09	66153728	66153928	SL4.0ch09:66153828	19	-1499	Solyc09g090570.2.1	Proton gradient regulation 5 (AHRD V3.3 *** A0A2U1Q6W9_ARTAN)
Replicates 1_3	SL4.0ch00	9237813	9238013	SL4.0ch00:9237913	33.9	-1515	Solyc00g500400.1.1	Unknown protein
Replicates 2_2	SL4.0ch06	2107070	2107270	SL4.0ch06:2107170	28	-1539	Solyc06g008210.5.1	Protein BREAST CANCER SUSCEPTIBILITY 1-like protein (AHRD V3.11 *** tr|A0A1J3HZN2|A0A1J3HZN2_NOCCA)
Replicates 3_1	SL4.0ch06	2107073	2107273	SL4.0ch06:2107173	20	-1542	Solyc06g008210.5.1	Protein BREAST CANCER SUSCEPTIBILITY 1-like protein (AHRD V3.11 *** tr|A0A1J3HZN2|A0A1J3HZN2_NOCCA)
Replicates 1_3	SL4.0ch09	503793	503993	SL4.0ch09:503893	18.7	-1543	Solyc09g005730.4.1	Plant protein 1589 of Uncharacterized protein function (AHRD V3.3 *** A0A061EZD3_THECC)
Replicates 2_2	SL4.0ch01	22061513	22061713	SL4.0ch01:22061613	26	-1547	Solyc01g016760.1.1	F-box/LRR-repeat protein (AHRD V3.3 *-* XP_004234380.1)
Replicates 2_3	SL4.0ch01	22061512	22061712	SL4.0ch01:22061612	26	-1548	Solyc01g016760.1.1	F-box/LRR-repeat protein (AHRD V3.3 *-* XP_004234380.1)
Replicates 1_3	SL4.0ch04	4635318	4635518	SL4.0ch04:4635418	18	-1559	Solyc04g014350.1.1	bHLH transcription factor 032
Replicates 2_1	SL4.0ch00	9237757	9237957	SL4.0ch00:9237857	122.6	-1571	Solyc00g500400.1.1	Unknown protein
Replicates 2_3	SL4.0ch00	9237757	9237957	SL4.0ch00:9237857	122.8	-1571	Solyc00g500400.1.1	Unknown protein
Replicates 2_2	SL4.0ch01	78536175	78536375	SL4.0ch01:78536275	34	-1578	Solyc01g094880.3.1	PLAC8 family protein (AHRD V3.3 *** A0A2U1MEC7_ARTAN)
Replicates 2_1	SL4.0ch01	78536174	78536374	SL4.0ch01:78536274	33	-1579	Solyc01g094880.3.1	PLAC8 family protein (AHRD V3.3 *** A0A2U1MEC7_ARTAN)
Replicates 2_3	SL4.0ch01	78536174	78536374	SL4.0ch01:78536274	33	-1579	Solyc01g094880.3.1	PLAC8 family protein (AHRD V3.3 *** A0A2U1MEC7_ARTAN)
Replicates 1_3	SL4.0ch12	66587001	66587201	SL4.0ch12:66587101	22	-1591	Solyc12g100290.3.1	Histone-lysine n-methyltransferase ashh3 (AHRD V3.3 *** A0A1J6IN09_NICAT)
Replicates 2_1	SL4.0ch00	3720383	3720583	SL4.0ch00:3720483	109.4	-1605	Solyc00g014790.2.1	Unknown protein
Replicates 2_2	SL4.0ch06	446154	446354	SL4.0ch06:446254	27	-1616	Solyc06g005430.1.1	Histone H4 (AHRD V3.3 *-* F2E7L1_HORVV)
Replicates 2_1	SL4.0ch08	51217383	51217583	SL4.0ch08:51217483	26	-1620	Solyc08g065230.1.1	serine/threonine-protein kinase EDR1-like (AHRD V3.3 *-* A0A2I4GPH3_9ROSI)
Replicates 2_3	SL4.0ch04	57711401	57711601	SL4.0ch04:57711501	26	-1645	Solyc04g072790.2.1	Cellulose synthase (AHRD V3.3 *** K4BTR6_SOLLC)
Replicates 3_1	SL4.0ch10	62210664	62210864	SL4.0ch10:62210764	35	-1645	Solyc10g083180.3.1	NAD(P)-binding Rossmann-fold superfamily protein (AHRD V3.11 *** tr|A0A2U1PL19|A0A2U1PL19_ARTAN)
Replicates 1_1	SL4.0ch00	9139707	9139907	SL4.0ch00:9139807	33	-1646	Solyc00g500391.1.1	Unknown protein
Replicates 3_3	SL4.0ch10	62210669	62210869	SL4.0ch10:62210769	36	-1650	Solyc10g083180.3.1	NAD(P)-binding Rossmann-fold superfamily protein (AHRD V3.11 *** tr|A0A2U1PL19|A0A2U1PL19_ARTAN)
Replicates 3_2	SL4.0ch10	62210670	62210870	SL4.0ch10:62210770	36	-1651	Solyc10g083180.3.1	NAD(P)-binding Rossmann-fold superfamily protein (AHRD V3.11 *** tr|A0A2U1PL19|A0A2U1PL19_ARTAN)
Replicates 2_1	SL4.0ch03	12649151	12649351	SL4.0ch03:12649251	78	-1661	Solyc03g046592.1.1	Unknown protein
Replicates 1_2	SL4.0ch08	9567940	9568140	SL4.0ch08:9568040	53.1	-1664	Solyc08g150111.1.1	Unknown protein
Replicates 1_3	SL4.0ch08	9567938	9568138	SL4.0ch08:9568038	79.4	-1666	Solyc08g150111.1.1	Unknown protein
Replicates 2_2	SL4.0ch08	9567936	9568136	SL4.0ch08:9568036	272.8	-1668	Solyc08g150111.1.1	Unknown protein
Replicates 2_1	SL4.0ch08	9567935	9568135	SL4.0ch08:9568035	241.6	-1669	Solyc08g150111.1.1	Unknown protein
Replicates 2_3	SL4.0ch08	9567935	9568135	SL4.0ch08:9568035	275.4	-1669	Solyc08g150111.1.1	Unknown protein
Replicates 3_3	SL4.0ch08	9567934	9568134	SL4.0ch08:9568034	45.6	-1670	Solyc08g150111.1.1	Unknown protein
Replicates 1_3	SL4.0ch05	21130135	21130335	SL4.0ch05:21130235	18	-1680	Solyc05g018440.1.1	Unknown protein
Replicates 1_2	SL4.0ch11	4768839	4769039	SL4.0ch11:4768939	23	-1696	Solyc11g011730.1.1	Auxin-responsive protein SAUR65 (AHRD V3.3 *** A0A2G3B0T7_CAPCH)
Replicates 1_1	SL4.0ch11	4768840	4769040	SL4.0ch11:4768940	23	-1697	Solyc11g011730.1.1	Auxin-responsive protein SAUR65 (AHRD V3.3 *** A0A2G3B0T7_CAPCH)
Replicates 2_3	SL4.0ch10	14783549	14783749	SL4.0ch10:14783649	43	-1697	Solyc10g032560.1.1	Unknown protein
Replicates 2_2	SL4.0ch06	37977233	37977433	SL4.0ch06:37977333	32	-1698	Solyc06g064720.1.1	NB-LRR tospovirus immune receptor (AHRD V3.3 *** A0A221IWV0_9SOLN)
Replicates 2_1	SL4.0ch11	1459002	1459202	SL4.0ch11:1459102	26	-1701	Solyc11g006880.3.1	jagunal-like protein (AHRD V3.3 *** AT5G51510.1)
Replicates 2_3	SL4.0ch11	1459002	1459202	SL4.0ch11:1459102	26	-1701	Solyc11g006880.3.1	jagunal-like protein (AHRD V3.3 *** AT5G51510.1)
Replicates 3_2	SL4.0ch00	3712076	3712276	SL4.0ch00:3712176	74	-1720	Solyc00g014810.1.1	Unknown protein
Replicates 2_3	SL4.0ch03	59385868	59386068	SL4.0ch03:59385968	28.1	-1726	Solyc03g115165.1.1	Unknown protein
Replicates 3_3	SL4.0ch02	37685738	37685938	SL4.0ch02:37685838	21	-1726	Solyc02g069850.3.1	40S ribosomal protein S25 (AHRD V3.3 *-* A0A2G3D4C4_CAPCH)
Replicates 3_2	SL4.0ch02	37685737	37685937	SL4.0ch02:37685837	21	-1727	Solyc02g069850.3.1	40S ribosomal protein S25 (AHRD V3.3 *-* A0A2G3D4C4_CAPCH)
Replicates 3_1	SL4.0ch08	9513896	9514096	SL4.0ch08:9513996	144	-1740	Solyc08g016796.1.1	Unknown protein
Replicates 3_1	SL4.0ch04	63928579	63928779	SL4.0ch04:63928679	24	-1747	Solyc04g082190.1.1	Neutral ceramidase (AHRD V3.3 *** A0A2G2ZSR2_CAPAN)
Replicates 2_2	SL4.0ch08	9442954	9443154	SL4.0ch08:9443054	224	-1749	Solyc08g150109.1.1	Unknown protein
Replicates 3_3	SL4.0ch08	573666	573866	SL4.0ch08:573766	20.5	-1752	Solyc08g005700.1.1	Unknown protein
Replicates 2_3	SL4.0ch09	50414040	50414240	SL4.0ch09:50414140	27	-1757	Solyc09g059340.2.1	Unknown protein
Replicates 2_3	SL4.0ch03	6545778	6545978	SL4.0ch03:6545878	26.6	-1757	Solyc03g043730.1.1	Unknown protein
Replicates 1_2	SL4.0ch04	4013866	4014066	SL4.0ch04:4013966	20.5	-1765	Solyc04g011550.2.1	pheromone-processing carboxypeptidase KEX1-like (AHRD V3.3 --* XP_022740211.1)
Replicates 3_1	SL4.0ch04	4013865	4014065	SL4.0ch04:4013965	26.2	-1766	Solyc04g011550.2.1	pheromone-processing carboxypeptidase KEX1-like (AHRD V3.3 --* XP_022740211.1)
Replicates 2_2	SL4.0ch12	29642214	29642414	SL4.0ch12:29642314	38.4	-1767	Solyc12g070155.1.1	Unknown protein
Replicates 1_1	SL4.0ch04	4013859	4014059	SL4.0ch04:4013959	22.3	-1772	Solyc04g011550.2.1	pheromone-processing carboxypeptidase KEX1-like (AHRD V3.3 --* XP_022740211.1)
Replicates 3_2	SL4.0ch04	4013859	4014059	SL4.0ch04:4013959	26.3	-1772	Solyc04g011550.2.1	pheromone-processing carboxypeptidase KEX1-like (AHRD V3.3 --* XP_022740211.1)
Replicates 2_3	SL4.0ch12	29642221	29642421	SL4.0ch12:29642321	37.6	-1774	Solyc12g070155.1.1	Unknown protein
Replicates 3_3	SL4.0ch04	4013857	4014057	SL4.0ch04:4013957	27	-1774	Solyc04g011550.2.1	pheromone-processing carboxypeptidase KEX1-like (AHRD V3.3 --* XP_022740211.1)
Replicates 1_3	SL4.0ch09	65372634	65372834	SL4.0ch09:65372734	19	-1775	Solyc09g089570.4.1	Agenet domain protein (AHRD V3.3 *-* G7JN46_MEDTR)
Replicates 3_1	SL4.0ch09	65372633	65372833	SL4.0ch09:65372733	24	-1776	Solyc09g089570.4.1	Agenet domain protein (AHRD V3.3 *-* G7JN46_MEDTR)
Replicates 3_3	SL4.0ch04	63928608	63928808	SL4.0ch04:63928708	25	-1776	Solyc04g082190.1.1	Neutral ceramidase (AHRD V3.3 *** A0A2G2ZSR2_CAPAN)
Replicates 1_3	SL4.0ch04	63928609	63928809	SL4.0ch04:63928709	18	-1777	Solyc04g082190.1.1	Neutral ceramidase (AHRD V3.3 *** A0A2G2ZSR2_CAPAN)
Replicates 2_1	SL4.0ch12	29642224	29642424	SL4.0ch12:29642324	37.5	-1777	Solyc12g070155.1.1	Unknown protein
Replicates 1_1	SL4.0ch04	3758751	3758951	SL4.0ch04:3758851	24.7	-1807	Solyc04g011330.1.1	Unknown protein
Replicates 2_1	SL4.0ch05	31599170	31599370	SL4.0ch05:31599270	29	-1812	Solyc05g024380.1.1	Unknown protein
Replicates 2_3	SL4.0ch05	31599170	31599370	SL4.0ch05:31599270	29	-1812	Solyc05g024380.1.1	Unknown protein
Replicates 2_2	SL4.0ch02	31272131	31272331	SL4.0ch02:31272231	32.7	-1827	Solyc02g061740.4.1	AMP-dependent synthetase/ligase (AHRD V3.11 *-* tr|A0A200QNJ1|A0A200QNJ1_9MAGN)
Replicates 1_1	SL4.0ch06	11941435	11941635	SL4.0ch06:11941535	19	-1840	Solyc06g016820.1.1	Unknown protein
Replicates 1_2	SL4.0ch06	11941439	11941639	SL4.0ch06:11941539	19	-1844	Solyc06g016820.1.1	Unknown protein
Replicates 3_1	SL4.0ch08	60034503	60034703	SL4.0ch08:60034603	22	-1850	Solyc08g078080.2.1	Pentatricopeptide repeat-containing protein
Replicates 1_3	SL4.0ch11	50236200	50236400	SL4.0ch11:50236300	20	-1853	Solyc11g066450.2.1	transmembrane protein (AHRD V3.3 *** AT5G22875.3)
Replicates 3_2	SL4.0ch08	60034513	60034713	SL4.0ch08:60034613	22	-1860	Solyc08g078080.2.1	Pentatricopeptide repeat-containing protein
Replicates 2_3	SL4.0ch02	37033643	37033843	SL4.0ch02:37033743	38.8	-1863	Solyc02g069055.1.1	Phloem protein 2-like (AHRD V3.3 *** A0A200QPN3_9MAGN)
Replicates 3_3	SL4.0ch08	60034517	60034717	SL4.0ch08:60034617	23	-1864	Solyc08g078080.2.1	Pentatricopeptide repeat-containing protein
Replicates 2_2	SL4.0ch03	63571596	63571796	SL4.0ch03:63571696	26	-1867	Solyc03g120900.3.1	WD40 repeat (AHRD V3.3 *** A0A200QDT5_9MAGN)
Replicates 1_1	SL4.0ch00	9076206	9076406	SL4.0ch00:9076306	25.2	-1869	Solyc00g500384.1.1	Unknown protein
Replicates 3_3	SL4.0ch01	55676583	55676783	SL4.0ch01:55676683	26	-1894	Solyc01g057585.1.1	Unknown protein
Replicates 2_3	SL4.0ch11	4851834	4852034	SL4.0ch11:4851934	29	-1901	Solyc11g011840.2.1	Oxidoreductase (AHRD V3.3 *-* A0A200R904_9MAGN)
Replicates 3_1	SL4.0ch04	4013698	4013898	SL4.0ch04:4013798	46.5	-1933	Solyc04g011550.2.1	pheromone-processing carboxypeptidase KEX1-like (AHRD V3.3 --* XP_022740211.1)
Replicates 1_3	SL4.0ch04	4013697	4013897	SL4.0ch04:4013797	33.5	-1934	Solyc04g011550.2.1	pheromone-processing carboxypeptidase KEX1-like (AHRD V3.3 --* XP_022740211.1)
Replicates 1_2	SL4.0ch04	4013696	4013896	SL4.0ch04:4013796	20.1	-1935	Solyc04g011550.2.1	pheromone-processing carboxypeptidase KEX1-like (AHRD V3.3 --* XP_022740211.1)
Replicates 1_3	SL4.0ch01	1811833	1812033	SL4.0ch01:1811933	22	-1935	Solyc01g007240.3.1	Late embryogenesis abundant (LEA) hydroxyproline-rich glycoprotein family (AHRD V3.3 *** O82294_ARATH)
Replicates 1_1	SL4.0ch04	4013692	4013892	SL4.0ch04:4013792	18.6	-1939	Solyc04g011550.2.1	pheromone-processing carboxypeptidase KEX1-like (AHRD V3.3 --* XP_022740211.1)
Replicates 3_3	SL4.0ch04	4013690	4013890	SL4.0ch04:4013790	46.1	-1941	Solyc04g011550.2.1	pheromone-processing carboxypeptidase KEX1-like (AHRD V3.3 --* XP_022740211.1)
Replicates 3_2	SL4.0ch04	4013689	4013889	SL4.0ch04:4013789	49.2	-1942	Solyc04g011550.2.1	pheromone-processing carboxypeptidase KEX1-like (AHRD V3.3 --* XP_022740211.1)
Replicates 2_2	SL4.0ch00	8474356	8474556	SL4.0ch00:8474456	116.7	-1944	Solyc00g500368.1.1	Unknown protein
Replicates 2_1	SL4.0ch00	8474355	8474555	SL4.0ch00:8474455	118.1	-1945	Solyc00g500368.1.1	Unknown protein
Replicates 2_3	SL4.0ch00	8474355	8474555	SL4.0ch00:8474455	118	-1945	Solyc00g500368.1.1	Unknown protein
Replicates 3_3	SL4.0ch02	9049629	9049829	SL4.0ch02:9049729	22	-1950	Solyc02g005500.1.1	Unknown protein
Replicates 2_1	SL4.0ch11	52415123	52415323	SL4.0ch11:52415223	26	-1951	Solyc11g069750.3.1	High-affinity nitrate transporter 2.2 (AHRD V3.3 *** NRT22_ORYSJ)
Replicates 2_3	SL4.0ch11	52415123	52415323	SL4.0ch11:52415223	26	-1951	Solyc11g069750.3.1	High-affinity nitrate transporter 2.2 (AHRD V3.3 *** NRT22_ORYSJ)
Replicates 3_3	SL4.0ch11	17723573	17723773	SL4.0ch11:17723673	28	-1952	Solyc11g051173.1.1	Unknown protein
Replicates 2_1	SL4.0ch08	9791388	9791588	SL4.0ch08:9791488	37	-1953	Solyc08g016806.1.1	Unknown protein
Replicates 2_3	SL4.0ch08	9791388	9791588	SL4.0ch08:9791488	37	-1953	Solyc08g016806.1.1	Unknown protein
Replicates 2_2	SL4.0ch08	9791389	9791589	SL4.0ch08:9791489	37	-1954	Solyc08g016806.1.1	Unknown protein
Replicates 3_1	SL4.0ch11	17723568	17723768	SL4.0ch11:17723668	28	-1957	Solyc11g051173.1.1	Unknown protein
Replicates 1_2	SL4.0ch01	1811809	1812009	SL4.0ch01:1811909	23	-1959	Solyc01g007240.3.1	Late embryogenesis abundant (LEA) hydroxyproline-rich glycoprotein family (AHRD V3.3 *** O82294_ARATH)
Replicates 2_2	SL4.0ch11	52415113	52415313	SL4.0ch11:52415213	26	-1961	Solyc11g069750.3.1	High-affinity nitrate transporter 2.2 (AHRD V3.3 *** NRT22_ORYSJ)
Replicates 1_1	SL4.0ch01	1811805	1812005	SL4.0ch01:1811905	23	-1963	Solyc01g007240.3.1	Late embryogenesis abundant (LEA) hydroxyproline-rich glycoprotein family (AHRD V3.3 *** O82294_ARATH)
Replicates 3_1	SL4.0ch01	1811805	1812005	SL4.0ch01:1811905	27	-1963	Solyc01g007240.3.1	Late embryogenesis abundant (LEA) hydroxyproline-rich glycoprotein family (AHRD V3.3 *** O82294_ARATH)
Replicates 3_2	SL4.0ch01	1811805	1812005	SL4.0ch01:1811905	26.6	-1963	Solyc01g007240.3.1	Late embryogenesis abundant (LEA) hydroxyproline-rich glycoprotein family (AHRD V3.3 *** O82294_ARATH)
Replicates 2_3	SL4.0ch08	3163229	3163429	SL4.0ch08:3163329	28	-1966	Solyc08g013780.1.1	F-box protein SKIP19-like (AHRD V3.11 *** tr|A0A2I4GUY1|A0A2I4GUY1_9ROSI)
Replicates 1_2	SL4.0ch04	1137306	1137506	SL4.0ch04:1137406	42	-1967	Solyc04g007430.2.1	bHLH transcription factor 031
Replicates 2_1	SL4.0ch01	1811801	1812001	SL4.0ch01:1811901	31.7	-1967	Solyc01g007240.3.1	Late embryogenesis abundant (LEA) hydroxyproline-rich glycoprotein family (AHRD V3.3 *** O82294_ARATH)
Replicates 3_3	SL4.0ch01	1811800	1812000	SL4.0ch01:1811900	26.6	-1968	Solyc01g007240.3.1	Late embryogenesis abundant (LEA) hydroxyproline-rich glycoprotein family (AHRD V3.3 *** O82294_ARATH)
Replicates 1_1	SL4.0ch04	1137302	1137502	SL4.0ch04:1137402	42	-1971	Solyc04g007430.2.1	bHLH transcription factor 031
Replicates 2_2	SL4.0ch04	1137302	1137502	SL4.0ch04:1137402	38	-1971	Solyc04g007430.2.1	bHLH transcription factor 031
Replicates 2_3	SL4.0ch04	1137301	1137501	SL4.0ch04:1137401	35	-1972	Solyc04g007430.2.1	bHLH transcription factor 031
Replicates 3_3	SL4.0ch04	1137300	1137500	SL4.0ch04:1137400	27	-1973	Solyc04g007430.2.1	bHLH transcription factor 031
Replicates 1_1	SL4.0ch07	56397217	56397417	SL4.0ch07:56397317	18	-1977	Solyc07g043020.1.1	Glycosyltransferase (AHRD V3.3 *-* A0A2I4FGA1_9ROSI)
Replicates 3_2	SL4.0ch04	1137295	1137495	SL4.0ch04:1137395	28	-1978	Solyc04g007430.2.1	bHLH transcription factor 031
Replicates 1_3	SL4.0ch04	1137293	1137493	SL4.0ch04:1137393	43	-1980	Solyc04g007430.2.1	bHLH transcription factor 031
Replicates 3_1	SL4.0ch04	1137292	1137492	SL4.0ch04:1137392	29	-1981	Solyc04g007430.2.1	bHLH transcription factor 031
Replicates 1_2	SL4.0ch05	2821540	2821740	SL4.0ch05:2821640	37.1	-1986	Solyc05g008420.4.1	Repressor of RNA polymerase III transcription (AHRD V3.3 *** A0A1U8F9V8_CAPAN)
Replicates 1_3	SL4.0ch05	2821540	2821740	SL4.0ch05:2821640	40.4	-1986	Solyc05g008420.4.1	Repressor of RNA polymerase III transcription (AHRD V3.3 *** A0A1U8F9V8_CAPAN)
Replicates 3_3	SL4.0ch02	33225196	33225396	SL4.0ch02:33225296	27	-1989	Solyc02g063133.1.1	Rad23 UV excision repair protein family (AHRD V3.3 *-* F4JD59_ARATH)
Replicates 3_2	SL4.0ch02	33225197	33225397	SL4.0ch02:33225297	27	-1990	Solyc02g063133.1.1	Rad23 UV excision repair protein family (AHRD V3.3 *-* F4JD59_ARATH)
Replicates 2_2	SL4.0ch00	4716377	4716577	SL4.0ch00:4716477	141	-1997	Solyc00g500233.1.1	Unknown protein
Replicates 2_2	SL4.0ch02	40213350	40213550	SL4.0ch02:40213450	27	-1997	Solyc02g077230.3.1	transmembrane protein (AHRD V3.3 *-* AT2G31090.1)
Replicates 2_1	SL4.0ch00	4716376	4716576	SL4.0ch00:4716476	141	-1998	Solyc00g500233.1.1	Unknown protein
Replicates 2_3	SL4.0ch00	4716376	4716576	SL4.0ch00:4716476	141	-1998	Solyc00g500233.1.1	Unknown protein
Replicates 1_1	SL4.0ch05	2821522	2821722	SL4.0ch05:2821622	41.8	-2004	Solyc05g008420.4.1	Repressor of RNA polymerase III transcription (AHRD V3.3 *** A0A1U8F9V8_CAPAN)
Replicates 3_2	SL4.0ch03	1902094	1902294	SL4.0ch03:1902194	30	-2009	Solyc03g007310.3.1	Abscisic acid receptor PYL8 (AHRD V3.3 *** A0A2G3CWW8_CAPCH)
Replicates 3_3	SL4.0ch03	1902093	1902293	SL4.0ch03:1902193	30	-2010	Solyc03g007310.3.1	Abscisic acid receptor PYL8 (AHRD V3.3 *** A0A2G3CWW8_CAPCH)
Replicates 3_1	SL4.0ch03	1902088	1902288	SL4.0ch03:1902188	30	-2015	Solyc03g007310.3.1	Abscisic acid receptor PYL8 (AHRD V3.3 *** A0A2G3CWW8_CAPCH)
Replicates 1_1	SL4.0ch00	9076363	9076563	SL4.0ch00:9076463	20.1	-2026	Solyc00g500384.1.1	Unknown protein
Replicates 1_2	SL4.0ch00	8474254	8474454	SL4.0ch00:8474354	26.7	-2046	Solyc00g500368.1.1	Unknown protein
Replicates 3_1	SL4.0ch00	8474253	8474453	SL4.0ch00:8474353	33.8	-2047	Solyc00g500368.1.1	Unknown protein
[truncated: 4,006 more rows]

## Sheet: Target genes on promoter
Gene ID	Description
[truncated: 1,647 more rows]

## Sheet: Total Peaks on Gene Body
# Replicates	Chr	Start	End	Position	Score	Gene ID	Description
[truncated: 6,946 more rows]

[truncated: 2 more sheets: Target genes on Gene body , Target gene list ]
