# Supplementary material for: Ethylene Response Factor SlERF.D6 promotes ripening initiation and ethylene response through downstream transcription factors SlDEAR2 and SlTCP12
Source: Research Square preprint supplement (doi:10.21203/rs.3.rs-4018812/v1), 2024-03-25
Supplement: Supplementary file 13 [file Dataset_S7.xlsx]

## Sheet: DEGs
From 29DPA to 42DPA
Solyc04g064770
Solyc04g055170
Solyc04g071070
Solyc09g091000
Solyc03g045140
Solyc10g079860
Solyc12g049030
Solyc03g006490
Solyc04g071083
Solyc01g006680
Solyc04g040130
Solyc07g022920
Solyc12g013610
Solyc05g009200
Solyc01g005470
Solyc04g160370
Solyc02g067440
Solyc07g026650
Solyc12g100270
Solyc12g038125
Solyc12g150114
Solyc01g100370
Solyc03g094020
Solyc07g006500
Solyc01g107780
Solyc03g111720
Solyc12g045035
Solyc03g113130
Solyc06g011403
Solyc10g005960
Solyc02g086970
Solyc12g013690
Solyc05g008390
Solyc07g040890
Solyc05g009310
Solyc06g033850
Solyc05g041540
Solyc02g014250
Solyc05g056620
Solyc12g010540
Solyc03g043850
Solyc12g045020
Solyc07g052740
Solyc07g049440
Solyc12g150125
Solyc06g060560
Solyc01g099620
Solyc01g105180
Solyc12g045037
Solyc12g100260
Solyc04g071890
Solyc12g094390
Solyc12g099130
Solyc12g013960
Solyc03g117680
Solyc05g056120
Solyc07g042490
Solyc01g096070
Solyc07g008930
Solyc02g070940
Solyc03g116700
Solyc01g066720
Solyc05g051800
Solyc11g071740
Solyc02g078000
Solyc02g078010
Solyc10g005030
Solyc04g048900
Solyc06g036110
Solyc01g111970
Solyc03g033460
Solyc06g072460
Solyc09g015000
Solyc12g044190
Solyc12g056674
Solyc06g005680
Solyc03g115665
Solyc12g100240
Solyc03g083560
Solyc05g047530
Solyc10g055200
Solyc01g096420
Solyc03g120420
Solyc08g080570
Solyc11g007900
Solyc12g096350
Solyc11g150107
Solyc12g006260
Solyc09g090900
Solyc02g070110
Solyc04g007470
Solyc04g077620
Solyc08g078950
Solyc02g093700
Solyc01g080680
Solyc12g006410
Solyc10g052500
Solyc11g072600
Solyc01g006400
Solyc07g042550
Solyc04g072035
Solyc11g068430
Solyc08g008110
Solyc03g121040
Solyc08g062960
Solyc01g008500
Solyc01g111230
Solyc04g083140
Solyc11g065520
Solyc04g076530
Solyc01g081250
Solyc10g050220
Solyc12g057020
Solyc07g007330
Solyc12g017240
Solyc06g006000
Solyc09g065560
Solyc11g017377
Solyc04g016000
Solyc03g115770
Solyc02g087850
Solyc07g053140
Solyc11g008630
Solyc04g072034
Solyc08g079550
Solyc10g006660
Solyc06g008590
Solyc05g007470
Solyc03g114100
Solyc02g079220
Solyc02g089620
Solyc03g098740
Solyc03g078640
Solyc09g013150
Solyc03g093110
Solyc04g074950
Solyc04g072032
Solyc06g007970
Solyc09g011080
Solyc03g093610
Solyc04g064880
Solyc01g094260
Solyc07g052230
Solyc01g006320
Solyc08g078090
Solyc07g045440
Solyc04g079050
Solyc03g093120
Solyc02g084210
Solyc04g080940
Solyc04g081890
Solyc04g078640
Solyc12g100250
Solyc02g071470
Solyc03g033790
Solyc07g043310
Solyc12g049400
Solyc06g007580
Solyc03g098730
Solyc01g081270
Solyc12g042600
Solyc03g098100
Solyc02g032860
Solyc11g011330
Solyc03g062830
Solyc10g008660
Solyc03g098790
Solyc09g097770
Solyc07g008520
Solyc01g080410
Solyc01g108910
Solyc10g055800
Solyc07g032380
Solyc04g074000
Solyc05g054090
Solyc02g061770
Solyc10g049970
Solyc10g078920
Solyc07g007590
Solyc01g065530
Solyc07g042170
Solyc06g009270
Solyc12g005090
Solyc08g080780
Solyc07g014670
Solyc02g082850
Solyc07g056250
Solyc11g008440
Solyc01g104720
Solyc04g071150
Solyc02g036350
Solyc05g051400
Solyc10g076510
Solyc06g007190
Solyc08g077370
Solyc04g074050
Solyc10g018780
Solyc05g052350
Solyc02g078380
Solyc10g084370
Solyc06g065100
Solyc10g079840
Solyc07g026705
Solyc12g011450
Solyc07g063860
Solyc11g072500
Solyc12g006420
Solyc02g078150
Solyc10g083290
Solyc05g010750
Solyc06g009960
Solyc12g160420
Solyc01g098950
Solyc12g098945
Solyc03g093080
Solyc02g078160
Solyc08g068870
Solyc02g004003
Solyc01g080020
Solyc03g093130
Solyc03g007650
Solyc04g055060
Solyc01g103590
Solyc05g046390
Solyc11g028100
Solyc01g087020
Solyc07g045260
Solyc06g076050
Solyc07g054860
Solyc03g120990
Solyc03g093140
Solyc01g081586
Solyc08g060920
Solyc03g059260
Solyc09g005470
Solyc06g007440
Solyc01g099920
Solyc10g080210
Solyc07g064190
Solyc01g009870
Solyc01g008620
Solyc02g071620
Solyc06g150123
Solyc04g076880
Solyc04g018055
Solyc11g038340
Solyc03g112030
Solyc04g081960
Solyc07g160130
Solyc04g150164
Solyc00g500088
Solyc03g111710
Solyc01g099780
Solyc12g089110
Solyc08g016808
Solyc12g089240
Solyc08g079840
Solyc03g117590
Solyc08g075570
Solyc05g008060
Solyc04g074020
Solyc06g043140
Solyc01g095460
Solyc03g115870
Solyc00g500043
Solyc06g053820
Solyc04g071805
Solyc01g009690
Solyc06g074670
Solyc01g091170
Solyc09g066100
Solyc10g008400
Solyc01g057770
Solyc06g051960
Solyc10g081570
Solyc07g008140
Solyc05g016380
Solyc01g098520
Solyc02g065170
Solyc03g120060
Solyc04g072890
Solyc10g049630
Solyc04g011450
Solyc09g075890
Solyc08g006770
Solyc07g043250
Solyc04g051360
Solyc07g052900
Solyc02g092460
Solyc06g063060
Solyc07g041070
Solyc02g085910
Solyc02g085300
Solyc02g083525
Solyc04g082220
Solyc08g068710
Solyc07g018210
Solyc10g086520
Solyc07g051820
Solyc08g007240
Solyc01g009700
Solyc00g500262
Solyc04g007900
Solyc08g067960
Solyc05g016715
Solyc12g008350
Solyc05g047460
Solyc12g040570
Solyc02g150132
Solyc01g044365
Solyc01g150159
Solyc00g019730
Solyc02g150128
Solyc08g061490
Solyc10g083330
Solyc08g077530
Solyc05g009780
Solyc06g063070
Solyc03g113190
Solyc01g013890
Solyc04g025040
Solyc10g075065
Solyc09g056380
Solyc11g022590
Solyc06g036540
Solyc04g072110
Solyc01g015000
Solyc02g070340
Solyc00g500303
Solyc09g008430
Solyc08g067370
Solyc10g087030
Solyc06g064550
Solyc09g018250
Solyc10g081370
Solyc10g006300
Solyc02g085340
Solyc00g500036
Solyc02g077920
Solyc12g088670
Solyc12g006980
Solyc05g009320
Solyc10g045480
Solyc11g020230
Solyc12g010730
Solyc00g160510
Solyc05g008100
Solyc01g087590
Solyc01g112010
Solyc08g062990
Solyc11g066890
Solyc12g006973
Solyc01g150170
Solyc06g008620
Solyc07g018010
Solyc09g011160
Solyc02g079510
Solyc12g038810
Solyc02g091197
Solyc04g082040
Solyc03g111860
Solyc02g084005
Solyc06g060510
Solyc04g082420
Solyc01g108030
Solyc07g045190
Solyc10g081970
Solyc10g079930
Solyc01g106510
Solyc12g049340
Solyc11g069097
Solyc03g119530
Solyc07g007990
Solyc10g018810
Solyc02g088520
Solyc00g160060
Solyc10g085420
Solyc03g020080
Solyc12g040640
Solyc09g150121
Solyc03g150159
Solyc10g005880
Solyc04g007880
Solyc09g098030
Solyc06g082170
Solyc06g011530
Solyc02g150146
Solyc00g500102
Solyc06g009140
Solyc06g073110
Solyc07g006280
Solyc07g063320
Solyc07g063240
Solyc08g082820
Solyc03g083445
Solyc00g125980
Solyc02g068280
Solyc05g052275
Solyc07g053600
Solyc03g112880
Solyc03g005570
Solyc03g095650
Solyc01g009705
Solyc01g112080
Solyc12g009480
Solyc01g091030
Solyc11g011380
Solyc07g052790
Solyc03g083910
Solyc02g038825
Solyc12g042170
Solyc02g021290
Solyc06g063210
Solyc11g005150
Solyc02g090360
Solyc07g056000
Solyc01g057000
Solyc10g008300
Solyc06g050630
Solyc02g031850
Solyc02g088940
Solyc10g011740
Solyc07g054780
Solyc01g086870
Solyc03g119520
Solyc08g062910
Solyc11g065910
Solyc02g089250
Solyc02g066800
Solyc05g007020
Solyc03g123400
Solyc04g079560
Solyc12g006007
Solyc10g007880
Solyc01g005760
Solyc02g063523
Solyc06g062840
Solyc01g044558
Solyc01g067680
Solyc03g005770
Solyc03g097570
Solyc06g049060
Solyc02g063527
Solyc07g064180
Solyc01g006550
Solyc10g086690
Solyc07g052785
Solyc00g500150
Solyc08g065610
Solyc10g079820
Solyc09g090730
Solyc06g072030
Solyc00g500035
Solyc00g500126
Solyc05g007140
Solyc08g075150
Solyc05g050360
Solyc04g007660
Solyc03g044350
Solyc04g050620
Solyc02g044030
Solyc02g071820
Solyc06g060090
Solyc09g056222
Solyc01g098530
Solyc07g053735
Solyc05g008980
Solyc08g065320
Solyc11g010390
Solyc11g010500
Solyc01g102700
Solyc10g080370
Solyc09g010390
Solyc09g098330
Solyc07g055670
Solyc03g031910
Solyc03g081270
Solyc02g091250
Solyc01g005870
Solyc01g010365
Solyc11g005615
Solyc07g063640
Solyc02g091030
Solyc10g076360
Solyc05g055880
Solyc01g108050
Solyc09g015490
Solyc01g102310
Solyc01g104320
Solyc03g111310
Solyc12g042180
Solyc01g104780
Solyc02g088700
Solyc09g009100
Solyc03g007950
Solyc12g019450
Solyc01g094540
Solyc01g110960
Solyc08g005560
Solyc10g081575
Solyc10g080240
Solyc05g013750
Solyc11g150146
Solyc06g076670
Solyc00g500278
Solyc11g020030
Solyc03g063450
Solyc05g009040
Solyc06g074290
Solyc08g079090
Solyc01g102570
Solyc02g069750
Solyc02g069110
Solyc04g072030
Solyc03g112050
Solyc07g018220
Solyc10g080670
Solyc02g076730
Solyc05g014550
Solyc09g005830
Solyc10g078370
Solyc01g102590
Solyc09g007760
Solyc06g083150
Solyc01g112370
Solyc11g066390
Solyc05g050400
Solyc10g052880
Solyc02g083350
Solyc00g500064
Solyc09g083200
Solyc01g079660
Solyc06g066470
Solyc11g068440
Solyc12g099200
Solyc06g082590
Solyc01g107010
Solyc03g117890
Solyc05g056130
Solyc03g118740
Solyc04g070970
Solyc07g026710
Solyc07g005720
Solyc06g072840
Solyc02g078040
Solyc04g005520
Solyc06g053180
Solyc02g077760
Solyc09g074940
Solyc10g074740
Solyc08g080180
Solyc01g067660
Solyc03g083470
Solyc10g055680
Solyc03g083280
Solyc09g011190
Solyc09g082950
Solyc08g005420
Solyc12g036650
Solyc07g041750
Solyc10g085070
Solyc04g014400
Solyc00g500324
Solyc08g016310
Solyc10g047150
Solyc02g036310
Solyc05g050920
Solyc12g013820
Solyc01g104280
Solyc02g083280
Solyc11g006740
Solyc04g077650
Solyc05g006050
Solyc12g010400
Solyc07g025210
Solyc05g014080
Solyc06g050230
Solyc09g011540
Solyc01g080890
Solyc02g078660
Solyc11g013310
Solyc02g044040
Solyc04g009050
Solyc00g500315
Solyc09g082580
Solyc04g081530
Solyc07g005970
Solyc08g005335
Solyc09g061280
Solyc11g072100
Solyc02g088560
Solyc03g112300
Solyc09g015130
Solyc11g006720
Solyc04g078520
Solyc01g087410
Solyc07g065500
Solyc08g076970
Solyc04g050390
Solyc02g062490
Solyc08g007460
Solyc07g008430
Solyc03g098410
Solyc03g032020
Solyc08g006780
Solyc02g063220
Solyc04g014960
Solyc02g086530
Solyc03g112150
Solyc04g079450
Solyc05g042010
Solyc08g066240
Solyc04g054256
Solyc01g020150
Solyc01g087390
Solyc00g244300
Solyc01g067090
Solyc02g064690
Solyc03g113710
Solyc04g047690
Solyc01g091260
Solyc01g095930
Solyc01g099650
Solyc05g008090
Solyc01g105660
Solyc06g084440
Solyc05g053770
Solyc02g080310
Solyc05g018410
Solyc06g048950
Solyc11g062400
Solyc10g085910
Solyc02g085950
Solyc04g054258
Solyc12g016070
Solyc02g022850
Solyc08g006360
Solyc03g117430
Solyc09g010380
Solyc07g043510
Solyc04g080280
Solyc04g006940
Solyc05g050820
Solyc02g083310
Solyc06g009335
Solyc00g500245
Solyc12g019710
Solyc02g092520
Solyc03g082690
Solyc08g078060
Solyc08g068660
Solyc05g018120
Solyc05g006890
Solyc03g119540
Solyc01g150152
Solyc04g064900
Solyc12g082730
Solyc01g098500
Solyc06g011630
Solyc01g099810
Solyc01g090730
Solyc01g106690
Solyc07g066230
Solyc06g053840
Solyc10g005280
Solyc01g096250
Solyc01g102490
Solyc02g090260
Solyc11g011440
Solyc06g075170
Solyc03g025400
Solyc08g059760
Solyc05g032680
Solyc06g075130
Solyc08g062360
Solyc11g005380
Solyc05g050130
Solyc04g014920
Solyc11g069800
Solyc06g036130
Solyc07g064870
Solyc10g018850
Solyc03g118470
Solyc09g074570
Solyc03g123560
Solyc09g010860
Solyc08g079300
Solyc03g093510
Solyc08g074307
Solyc10g083580
Solyc07g062720
Solyc03g044180
Solyc04g014480
Solyc04g150132
Solyc08g014030
Solyc01g087400
Solyc04g081030
Solyc07g065510
Solyc07g063410
Solyc10g044710
Solyc07g054270
Solyc02g081810
Solyc03g120560
Solyc02g086270
Solyc04g077640
Solyc05g007170
Solyc12g041980
Solyc04g017710
Solyc09g091750
Solyc03g062665
Solyc02g062640
Solyc09g007100
Solyc06g048740
Solyc10g005100
Solyc10g051020
Solyc04g079060
Solyc05g009480
Solyc08g068600
Solyc00g500191
Solyc06g066460
Solyc02g093050
Solyc04g076820
Solyc06g068430
Solyc07g054790
Solyc02g086910
Solyc02g065550
Solyc01g005140
Solyc01g080870
Solyc10g162780
Solyc03g096190
Solyc04g071330
Solyc01g058260
Solyc04g071085
Solyc03g080090
Solyc02g071970
Solyc02g081200
Solyc03g063600
Solyc03g093890
Solyc05g047590
Solyc00g500040
Solyc01g099340
Solyc06g031716
Solyc06g072350
Solyc09g055570
Solyc10g049580
Solyc06g072340
Solyc03g065250
Solyc01g103470
Solyc12g038420
Solyc01g088370
Solyc01g099360
Solyc09g074050
Solyc01g112120
Solyc05g162440
Solyc12g009520
Solyc03g120140
Solyc10g018120
Solyc07g056570
Solyc01g108300
Solyc10g078420
Solyc02g088240
Solyc01g095220
Solyc02g087720
Solyc03g078780
Solyc06g060110
Solyc08g068610
Solyc09g008830
Solyc04g007500
Solyc06g071140
Solyc12g014440
Solyc04g071030
Solyc01g079260
Solyc02g088090
Solyc02g091710
Solyc09g008020
Solyc01g010490
Solyc01g090460
Solyc01g090680
Solyc07g006480
Solyc12g010030
Solyc06g068490
Solyc02g064640
Solyc08g014120
Solyc03g025870
Solyc09g075420
Solyc03g078570
Solyc07g009437
Solyc12g057140
Solyc01g007070
Solyc00g500406
Solyc08g006410
Solyc09g075210
Solyc02g082830
Solyc06g065190
Solyc12g006370
Solyc11g071910
Solyc07g063610
Solyc01g008850
Solyc03g113060
Solyc07g056210
Solyc02g091800
Solyc06g050760
Solyc07g047840
Solyc03g031890
Solyc01g008020
Solyc02g093270
Solyc04g076950
Solyc12g099210
Solyc02g086780
Solyc05g150151
Solyc04g074030
Solyc11g066660
Solyc09g092110
Solyc12g011023
Solyc08g077960
Solyc06g071280
Solyc11g062240
Solyc10g051030
Solyc01g107510
Solyc05g007150
Solyc03g113870
Solyc09g162070
Solyc07g054460
Solyc11g010190
Solyc08g065210
Solyc05g012440
Solyc04g025530
Solyc06g036290
Solyc09g008970
Solyc03g081240
Solyc08g078700
Solyc03g115230
Solyc09g065660
Solyc03g007890
Solyc02g014860
Solyc02g077670
Solyc05g052520
Solyc04g012140
Solyc03g123540
Solyc12g013700
Solyc01g111350
Solyc04g011440
Solyc05g052950
Solyc12g088220
Solyc12g009240
Solyc09g005120
Solyc06g073830
Solyc05g007895
Solyc11g071830
Solyc12g042830
Solyc06g150138
Solyc06g082560
Solyc05g046310
Solyc02g070890
Solyc03g120090
Solyc06g050310
Solyc06g072430
Solyc02g087110
Solyc11g008720
Solyc11g008540
Solyc09g082250
Solyc05g051660
Solyc09g066150
Solyc01g100000
Solyc09g018280
Solyc11g066100
Solyc02g077880
Solyc06g053960
Solyc07g049300
Solyc01g104740
Solyc05g005280
Solyc04g150102
Solyc03g098320
Solyc06g082070
Solyc05g013630
Solyc10g005080
Solyc12g057060
Solyc06g006080
Solyc04g008100
Solyc08g080640
Solyc07g065920
Solyc12g015880
Solyc10g051120
Solyc09g015020
Solyc02g065540
Solyc01g088590
Solyc12g005760
Solyc08g078300
Solyc08g061270
Solyc02g021680
Solyc05g007070
Solyc07g054760
Solyc04g076340
Solyc04g014530
Solyc09g072560
Solyc09g075950
Solyc02g083930
Solyc05g055010
Solyc05g005290
Solyc09g074430
Solyc01g096040
Solyc04g015560
Solyc07g024000
Solyc12g009440
Solyc04g079760
Solyc03g097670
Solyc08g080540
Solyc07g064160
Solyc09g009530
Solyc02g087350
Solyc08g007800
Solyc04g076010
Solyc06g008920
Solyc03g044150
Solyc03g025710
Solyc03g116770
Solyc09g161950
Solyc04g071990
Solyc02g069260
Solyc01g111340
Solyc09g089720
Solyc05g007880
Solyc01g095530
Solyc11g073260
Solyc02g081550
Solyc01g094170
Solyc10g084170
Solyc08g074740
Solyc03g119610
Solyc03g123740
Solyc08g078650
Solyc09g011470
Solyc11g008530
Solyc01g108100
Solyc02g093330
Solyc02g090390
Solyc08g082190
Solyc01g005560
Solyc10g083400
Solyc09g091550
Solyc10g054910
Solyc10g009110
Solyc03g119150
Solyc12g089220
Solyc01g102610
Solyc03g031860
Solyc10g078510
Solyc02g094030
Solyc01g108930
Solyc01g088400
Solyc10g005840
Solyc01g097470
Solyc05g014280
Solyc08g014000
Solyc02g081600
Solyc04g078880
Solyc02g062130
Solyc11g071810
Solyc01g103920
Solyc02g082900
Solyc11g020040
Solyc01g107090
Solyc03g122100
Solyc01g010250
Solyc02g088610
Solyc10g078410
Solyc12g005860
Solyc03g119590
Solyc02g076690
Solyc02g070800
Solyc03g098795
Solyc09g090070
Solyc06g008820
Solyc12g089140
Solyc09g008170
Solyc10g079870
Solyc06g074420
Solyc03g097760
Solyc06g076020
Solyc11g020960
Solyc12g096870
Solyc09g025210
Solyc10g084320
Solyc03g118540
Solyc12g044900
Solyc03g116460
Solyc03g121600
Solyc08g081890
Solyc01g087950
Solyc08g062340
Solyc04g014883
Solyc08g080630
Solyc02g089550
Solyc01g111250
Solyc07g048090
Solyc11g045225
Solyc02g021260
Solyc12g098810
Solyc12g056675
Solyc11g005860
Solyc03g005020
Solyc03g112700
Solyc11g007540
Solyc11g008420
Solyc08g078510
Solyc11g006540
Solyc01g010230
Solyc01g091130
Solyc06g150130
Solyc05g051220
Solyc09g075470
Solyc02g150126
Solyc12g056678
Solyc08g080490
Solyc05g052100
Solyc01g020526
Solyc05g007180
Solyc05g015490
Solyc07g054140
Solyc01g100010
Solyc10g161270
Solyc05g013640
Solyc08g078180
Solyc10g051373
Solyc08g041770
Solyc02g078570
Solyc09g008780
Solyc01g066740
Solyc11g066830
Solyc02g067660
Solyc06g066370
Solyc02g072000
Solyc01g111210
Solyc02g080530
Solyc06g074730
Solyc06g061280
Solyc10g051377
Solyc07g066380
Solyc05g009240
Solyc08g005090
Solyc09g007850
Solyc09g005320
Solyc03g063730
Solyc10g005200
Solyc04g012160
Solyc01g108900
Solyc02g091700
Solyc11g017010
Solyc06g082640
Solyc01g099150
Solyc05g056390
Solyc10g081940
Solyc09g092430
Solyc12g005980
Solyc08g077870
Solyc12g087960
Solyc01g010480
Solyc03g005580
Solyc05g055870
Solyc10g081010
Solyc10g078590
Solyc11g068770
Solyc08g078460
Solyc06g062960
Solyc10g024490
Solyc03g044910
Solyc08g077230
Solyc11g066360
Solyc03g119930
Solyc11g044450
Solyc05g056560
Solyc09g065610
Solyc11g068730
Solyc06g065650
Solyc05g006490
Solyc08g077330
Solyc01g095030
Solyc05g005460
Solyc01g087790
Solyc07g063600
Solyc02g091920
Solyc09g008530
Solyc01g007990
Solyc01g095470
Solyc10g024495
Solyc02g069680
Solyc06g083190
Solyc09g064380
Solyc02g093420
Solyc03g095820
Solyc07g021120
Solyc09g061310
Solyc06g068940
Solyc04g058150
Solyc10g085920
Solyc07g064600
Solyc02g068590
Solyc12g098710
Solyc11g072470
Solyc06g060340
Solyc04g078420
Solyc04g011350
Solyc02g065000
Solyc02g090620
Solyc08g078190
Solyc04g072900
Solyc04g051350
Solyc05g053100
Solyc03g025380
Solyc06g073030
Solyc09g082810
Solyc12g006630
Solyc03g116480
Solyc04g055000
Solyc10g086150
Solyc01g020190
Solyc02g079930
Solyc07g062070
Solyc02g084570
Solyc07g047800
Solyc02g092110
Solyc03g025600
Solyc05g054210
Solyc08g065260
Solyc04g080010
Solyc03g120980
Solyc03g020050
Solyc05g050120
Solyc10g085870
Solyc02g087980
Solyc06g051350
Solyc03g118450
Solyc08g075370
Solyc05g016060
Solyc03g078630
Solyc09g150139
Solyc09g008190
Solyc04g072036
Solyc04g016200
Solyc12g088400
Solyc12g099430
Solyc01g091270
Solyc05g052410
Solyc01g081640
Solyc04g051690
Solyc10g086410
Solyc04g012060
Solyc01g108000
Solyc02g089160
Solyc04g080700
Solyc02g083410
Solyc02g082770
Solyc03g032090
Solyc02g092150
Solyc04g072070
Solyc05g012230
Solyc02g061790
Solyc02g005003
Solyc01g103030
Solyc03g007460
Solyc05g018510
Solyc06g082080
Solyc06g068990
Solyc07g045460
Solyc03g116890
Solyc07g040990
Solyc08g077110
Solyc06g060300
Solyc09g010980
Solyc01g068460
Solyc07g061740
Solyc02g063355
Solyc10g079410
Solyc06g073380
Solyc02g062390
Solyc06g150137
Solyc07g006130
Solyc07g006680
Solyc01g005210
Solyc08g069060
Solyc07g045320
Solyc10g050980
Solyc06g083980
Solyc03g093800
Solyc01g150156
Solyc04g077780
Solyc03g031800
Solyc04g056410
Solyc11g072480
Solyc01g097990
Solyc01g105030
Solyc08g066390
Solyc01g107390
Solyc10g081750
Solyc12g005380
Solyc06g082190
Solyc05g024010
Solyc04g071140
Solyc04g073970
Solyc11g008350
Solyc05g014590
Solyc07g063930
Solyc03g114910
Solyc11g006250
Solyc01g107590
Solyc09g075600
Solyc12g099160
Solyc10g083630
Solyc12g005230
Solyc01g005080
Solyc07g007130
Solyc03g044790
Solyc03g115900
Solyc04g082950
Solyc06g073760
Solyc11g008810
Solyc03g121060
Solyc05g007060
Solyc09g005560
Solyc10g083730
Solyc07g053740
Solyc03g116370
Solyc00g217960
Solyc12g013500
Solyc11g018680
Solyc07g052240
Solyc02g063000
Solyc12g009560
Solyc12g036470
Solyc01g095140
Solyc03g118290
Solyc02g067350
Solyc05g010340
Solyc10g017960
Solyc12g099830
Solyc06g069820
Solyc10g079370
Solyc01g066457
Solyc01g107850
Solyc06g036170
Solyc03g005760
Solyc06g035580
Solyc08g068290
Solyc06g051250
Solyc10g018670
Solyc07g062220
Solyc07g054770
Solyc10g005690
Solyc10g078930
Solyc02g071100
Solyc06g062600
Solyc06g069430
Solyc12g088390
Solyc01g014105
Solyc05g053470
Solyc01g100040
Solyc09g090090
Solyc05g006660
Solyc07g055870
Solyc02g085290
Solyc06g051660
Solyc11g069810
Solyc03g007860
Solyc10g085020
Solyc09g082460
Solyc09g014380
Solyc04g082720
Solyc08g041860
Solyc12g096430
Solyc02g065530
Solyc11g011160
Solyc01g097950
Solyc08g082940
Solyc01g110000
Solyc09g014480
Solyc11g006300
Solyc01g099160
Solyc02g069810
Solyc05g053620
Solyc08g080360
Solyc03g096830
Solyc10g006880
Solyc01g005980
Solyc04g057940
Solyc09g014990
Solyc03g071570
Solyc03g111260
Solyc10g074970
Solyc03g121090
Solyc04g080030
Solyc01g100600
Solyc06g074710
Solyc06g049020
Solyc03g150151
Solyc01g065500
Solyc01g104130
Solyc01g007100
Solyc05g008920
Solyc05g053550
Solyc07g051950
Solyc02g077610
Solyc09g057760
Solyc02g093180
Solyc05g005570
Solyc08g063040
Solyc02g068120
Solyc06g061200
Solyc02g091830
Solyc12g009610
Solyc10g079570
Solyc07g053240
Solyc12g099930
Solyc03g082920
Solyc02g081030
Solyc05g007450
Solyc08g065430
Solyc03g114930
Solyc08g060810
Solyc06g035610
Solyc01g109660
Solyc08g077980
Solyc03g113270
Solyc10g009060
Solyc02g084303
Solyc02g082670
Solyc02g089540
Solyc11g006910
Solyc02g066830
Solyc07g063110
Solyc09g008670
Solyc01g087470
Solyc10g083370
Solyc02g082660
Solyc12g094650
Solyc09g015380
Solyc02g067230
Solyc02g077510
Solyc01g150144
Solyc06g007220
Solyc12g056470
Solyc12g006240
Solyc10g008320
Solyc05g013810
Solyc06g073165
Solyc05g005980
Solyc12g095980
Solyc10g085850
Solyc09g090760
Solyc03g044100
Solyc03g116510
Solyc06g073730
Solyc10g084960
Solyc10g086480
Solyc10g084760
Solyc06g076490
Solyc02g084870
Solyc06g064900
Solyc04g053130
Solyc12g038800
Solyc01g067830
Solyc02g076680
Solyc03g096380
Solyc06g051400
Solyc05g005540
Solyc10g079620
Solyc11g066060
Solyc01g094810
Solyc07g007930
Solyc01g106820
Solyc12g005750
Solyc02g084290
Solyc01g110310
Solyc12g099390
Solyc05g055650
Solyc12g042950
Solyc12g008490
Solyc01g106060
Solyc08g079880
Solyc02g067750
Solyc02g089850
Solyc06g005450
Solyc12g094550
Solyc01g079470
Solyc02g090430
Solyc09g008175
Solyc10g083670
Solyc03g113920
Solyc02g091130
Solyc04g005670
Solyc06g016790
Solyc03g118510
Solyc01g097770
Solyc10g076370
Solyc02g067040
Solyc08g077480
Solyc12g008920
Solyc01g079610
Solyc08g079900
Solyc04g007070
Solyc07g054300
Solyc03g093250
Solyc01g096340
Solyc03g112760
Solyc04g058180
Solyc06g062950
Solyc12g009220
Solyc01g008660
Solyc02g093300
Solyc12g097020
Solyc02g063520
Solyc11g018690
Solyc03g098480
Solyc09g091180
Solyc10g085230
Solyc06g076540
Solyc08g082680
Solyc10g078715
Solyc07g005760
Solyc06g008610
Solyc08g075430
Solyc05g021245
Solyc02g077490
Solyc01g010410
Solyc01g150165
Solyc03g034410
Solyc08g079170
Solyc06g076160
Solyc02g080340
Solyc10g078700
Solyc01g111310
Solyc11g069700
Solyc11g013270
Solyc07g049150
Solyc04g081900
Solyc07g047670
Solyc01g059965
Solyc06g053620
Solyc04g080040
Solyc05g006030
Solyc09g072600
Solyc11g012040
Solyc05g013300
Solyc01g107360
Solyc03g114580
Solyc08g075490
Solyc10g075160
Solyc11g040040
Solyc09g083060
Solyc00g500322
Solyc03g007230
Solyc10g080550
Solyc05g007220
Solyc11g006060
Solyc09g063010
Solyc07g049500
Solyc03g083360
Solyc07g064620
Solyc04g056580
Solyc05g055080
Solyc09g008505
Solyc02g070880
Solyc01g060020
Solyc01g098110
Solyc02g079770
Solyc02g082740
Solyc03g078150
Solyc04g025600
Solyc04g051490
Solyc02g078760
Solyc02g077430
Solyc05g015865
Solyc07g065410
Solyc01g088440
Solyc12g088370
Solyc11g008820
Solyc12g014420
Solyc08g082620
Solyc07g007410
Solyc06g053780
Solyc08g016670
Solyc06g053810
Solyc03g006260
Solyc06g083750
Solyc02g077190
Solyc03g117480
Solyc02g083450
Solyc08g081160
Solyc01g090440
Solyc02g083760
Solyc04g064545
Solyc08g007130
Solyc03g114710
Solyc02g092140
Solyc10g078520
Solyc12g044330
Solyc09g011720
Solyc06g059740
Solyc10g076660
Solyc05g051900
Solyc09g010800
Solyc01g006890
Solyc11g066330
Solyc01g090740
Solyc01g102280
Solyc02g070040
Solyc02g079010
Solyc01g105140
Solyc08g074480
Solyc03g097170
Solyc08g042000
Solyc11g021360
Solyc01g088660
Solyc05g008940
Solyc01g088250
Solyc07g065270
Solyc09g065760
Solyc03g083090
Solyc06g050370
Solyc09g074210
Solyc11g008960
Solyc03g096250
Solyc01g109340
Solyc07g064400
Solyc02g092800
Solyc00g160770
Solyc06g008030
Solyc12g015850
Solyc11g072623
Solyc01g106790
Solyc03g095250
Solyc09g064530
Solyc05g025513
Solyc07g066320
Solyc12g099140
Solyc08g076150
Solyc02g088500
Solyc12g056600
Solyc01g067790
Solyc06g082300
Solyc10g085040
Solyc08g083330
Solyc06g076320
Solyc02g084430
Solyc02g093980
Solyc03g111690
Solyc04g054740
Solyc09g092330
Solyc09g082220
Solyc12g007300
Solyc01g066430
Solyc01g094190
Solyc04g082970
Solyc04g079710
Solyc10g086000
Solyc03g026120
Solyc02g087580
Solyc04g054830
Solyc01g010430
Solyc07g053950
Solyc06g068460
Solyc04g008570
Solyc08g083310
Solyc02g090870
Solyc04g077980
Solyc01g066570
Solyc07g017220
Solyc03g043950
Solyc05g025600
Solyc03g007770
Solyc02g020890
Solyc06g069580
Solyc12g056410
Solyc05g150111
Solyc02g090970
Solyc01g091360
Solyc05g008450
Solyc07g062580
Solyc03g026000
Solyc03g007180
Solyc06g074000
Solyc04g008290
Solyc07g063770
Solyc01g005000
Solyc06g071420
Solyc07g007755
Solyc08g062290
Solyc04g074230
Solyc05g012560
Solyc09g091060
Solyc11g069270
Solyc10g081930
Solyc09g082340
Solyc09g065080
Solyc06g071850
Solyc08g036600
Solyc01g089880
Solyc02g086300
Solyc08g077100
Solyc02g069270
Solyc07g008540
Solyc07g007400
Solyc09g082230
Solyc11g161700
Solyc02g083670
Solyc01g067570
Solyc06g071500
Solyc06g076700
Solyc09g090150
Solyc05g007850
Solyc06g082610
Solyc08g005480
Solyc06g019200
Solyc09g005090
Solyc03g096900
Solyc02g084720
Solyc02g089320
Solyc04g055253
Solyc02g062670
Solyc09g089690
Solyc05g054860
Solyc11g005190
Solyc12g089145
Solyc06g082460
Solyc06g074630
Solyc03g121300
Solyc04g078870
Solyc02g044000
Solyc03g007560
Solyc03g096390
Solyc07g062160
Solyc05g050460
Solyc09g059990
Solyc07g009473
Solyc10g086650
Solyc11g005720
Solyc08g079600
Solyc04g017620
Solyc04g076960
Solyc04g072450
Solyc06g062780
Solyc05g007160
Solyc11g010960
Solyc02g068340
Solyc12g056360
Solyc08g063090
Solyc05g056550
Solyc07g007420
Solyc06g074140
Solyc06g065330
Solyc03g007800
Solyc05g054880
Solyc12g098370
Solyc07g054060
Solyc02g088120
Solyc06g073190
Solyc01g005370
Solyc01g008440
Solyc04g072940
Solyc01g068380
Solyc08g005050
Solyc01g005440
Solyc07g065745
Solyc07g063170
Solyc10g044986
Solyc09g059170
Solyc02g093790
Solyc06g009380
Solyc10g080100
Solyc03g123860
Solyc02g088230
Solyc05g051510
Solyc11g073075
Solyc09g009830
Solyc07g061930
Solyc03g025290
Solyc08g068630
Solyc08g078450
Solyc11g010430
Solyc05g012325
Solyc05g011890
Solyc06g083660
Solyc08g080200
Solyc10g080020
Solyc10g005210
Solyc12g036267
Solyc05g053930
Solyc05g053290
Solyc10g012370
Solyc05g005150
Solyc02g089630
Solyc11g010120
Solyc09g061840
Solyc02g077210
Solyc07g065320
Solyc04g063380
Solyc02g084610
Solyc05g053210
Solyc10g008130
Solyc04g055090
Solyc08g080380
Solyc07g042300
Solyc12g005880
Solyc11g042455
Solyc06g061170
Solyc03g081330
Solyc02g083540
Solyc06g073040
Solyc03g044330
Solyc04g071790
Solyc01g044556
Solyc01g079110
Solyc01g105520
Solyc09g011650
Solyc11g018500
Solyc02g078750
Solyc02g094240
Solyc00g500095
Solyc12g027897
Solyc02g092410
Solyc09g065910
Solyc08g080650
Solyc10g045420
Solyc11g006900
Solyc03g119830
Solyc10g050110
Solyc03g117310
Solyc01g086730
Solyc03g120570
Solyc04g076300
Solyc12g056560
Solyc10g083990
Solyc06g006024
Solyc07g041640
Solyc06g072650
Solyc07g042160
Solyc11g071850
Solyc02g091180
Solyc10g086680
Solyc06g048470
Solyc02g083880
Solyc04g078910
Solyc12g043120
Solyc09g010970
Solyc02g092680
Solyc03g113680
Solyc08g006110
Solyc12g010940
Solyc05g005337
Solyc02g065260
Solyc07g014640
Solyc07g018000
Solyc03g118040
Solyc11g008980
Solyc03g025730
Solyc02g069580
Solyc07g052960
Solyc12g098960
Solyc12g010020
Solyc06g071100
Solyc11g073055
Solyc02g084280
Solyc02g091260
Solyc12g006060
Solyc01g113620
Solyc11g010850
Solyc09g063070
Solyc04g056560
Solyc09g090520
Solyc01g081440
Solyc03g115590
Solyc01g066440
Solyc11g008600
Solyc09g065850
Solyc07g006710
Solyc07g051870
Solyc09g075300
Solyc02g086470
Solyc09g031920
Solyc04g079360
Solyc11g013890
Solyc03g096050
Solyc11g005160
Solyc01g090693
Solyc02g071730
Solyc05g007490
Solyc06g071580
Solyc07g044980
Solyc04g009300
Solyc02g082440
Solyc02g084710
Solyc02g082510
Solyc12g049560
Solyc08g005770
Solyc02g088100
Solyc02g093210
Solyc02g090990
Solyc06g006100
Solyc06g053980
Solyc03g113340
Solyc05g056200
Solyc07g063530
Solyc08g005630
Solyc09g007010
Solyc04g009260
Solyc09g150126
Solyc10g081460
Solyc01g098720
Solyc07g007180
Solyc01g089890
Solyc02g067180
Solyc04g081420
Solyc10g050960
Solyc02g089270
Solyc05g006530
Solyc09g005530
Solyc03g083680
Solyc06g075610
Solyc07g049530
Solyc01g096730
Solyc09g091530
Solyc01g106210
Solyc09g015080
Solyc09g059950
Solyc09g018070
Solyc05g008370
Solyc07g063420
Solyc08g075840
Solyc07g053050
Solyc05g026215
Solyc12g009490
Solyc01g067800
Solyc03g034020
Solyc06g160920
Solyc06g050250
Solyc06g050270
Solyc00g500353
Solyc01g010150
Solyc09g009770
Solyc03g007960
Solyc02g077090
Solyc01g100230
Solyc02g089690
Solyc04g055255
Solyc02g078480
Solyc05g013480
Solyc02g081370
Solyc10g081830
Solyc01g095080
Solyc10g084660
Solyc09g083350
Solyc07g005210
Solyc00g500313
Solyc12g008980
Solyc07g061935
Solyc12g044420
Solyc03g114950
Solyc02g065420
Solyc09g014740
Solyc02g081360
Solyc01g098410
Solyc11g005700
Solyc01g067890
Solyc02g064590
Solyc10g081910
Solyc04g082160
Solyc07g009330
Solyc02g072210
Solyc03g121280
Solyc06g082910
Solyc05g055340
Solyc02g093720
Solyc02g068820
Solyc07g047680
Solyc05g008140
Solyc10g006150
Solyc11g010790
Solyc01g091530
Solyc04g017610
Solyc01g111400
Solyc05g008130
Solyc03g113880
Solyc01g014270
Solyc07g042230
Solyc02g094860
Solyc05g051560
Solyc01g107890
Solyc01g109680
Solyc04g079480
Solyc01g005220
Solyc06g006022
Solyc01g017795
Solyc03g119310
Solyc06g071210
Solyc01g079410
Solyc12g010740
Solyc06g075580
Solyc07g006180
Solyc02g094390
Solyc04g064920
Solyc08g077990
Solyc03g117870
Solyc02g077940
Solyc08g005610
Solyc10g079600
Solyc12g010010
Solyc01g006370
Solyc08g082590
Solyc09g007340
Solyc08g006600
Solyc01g090240
Solyc03g111680
Solyc08g006980
Solyc05g009950
Solyc08g076790
Solyc02g078630
Solyc11g009000
Solyc08g048390
Solyc12g006520
Solyc10g085620
Solyc06g036640
Solyc11g012320
Solyc02g070280
Solyc07g025457
Solyc02g088340
Solyc05g009610
Solyc10g076720
Solyc06g018100
Solyc09g005730
Solyc06g051260
Solyc04g071800
Solyc12g006320
Solyc04g081970
Solyc02g090960
Solyc06g036250
Solyc02g070875
Solyc05g012110
Solyc01g090697
Solyc03g083730
Solyc05g008530
Solyc05g009630
Solyc03g019650
Solyc10g086760
Solyc06g059870
Solyc04g072200
Solyc12g010430
Solyc08g081220
Solyc03g119960
Solyc08g066740
Solyc03g044060
Solyc05g006850
Solyc08g006765
Solyc07g049690
Solyc12g055710
Solyc04g080160
Solyc07g053615
Solyc02g082060
Solyc06g071720
Solyc06g160660
Solyc08g066610
Solyc00g500024
Solyc02g084410
Solyc03g111650
Solyc06g011350
Solyc11g018710
Solyc12g056780
Solyc12g062480
Solyc07g052770
Solyc07g032510
Solyc07g055160
Solyc12g038343
Solyc09g011170
Solyc12g062340
Solyc01g110380
Solyc02g062550
Solyc11g066930
Solyc09g092340
Solyc02g092660
Solyc06g054150
Solyc10g076760
Solyc12g014570
Solyc01g090590
Solyc07g043150
Solyc04g015850
Solyc09g098050
Solyc12g014490
Solyc06g074030
Solyc10g078880
Solyc02g032200
Solyc11g012260
Solyc02g091690
Solyc10g055760
Solyc08g081070
Solyc01g099470
Solyc08g068440
Solyc09g008380
Solyc11g006190
Solyc08g083130
Solyc07g055710
Solyc01g080500
[truncated: 11,493 more rows]

## Sheet: On promoter DEGs
Gene ID
Solyc12g100120	Proline-tRNA ligase (DUF1680) (AHRD V3.3 *** Q9LXU4_ARATH)
Solyc12g099560	Arginine methyltransferase (AHRD V3.3 *** A0A1Y1HZY4_KLENI)
Solyc12g098810	Chitinase-like protein (AHRD V3.3 *** Q6JX04_GOSHI)
Solyc12g096170	embryo defective 3006 (AHRD V3.3 *** AT4G19350.1)
Solyc12g096140	Pentatricopeptide repeat-containing protein (AHRD V3.3 *** A0A2G2VI49_CAPBA)
Solyc12g087790	Unknown protein
Solyc12g068070	Filament-like plant protein 3 (AHRD V3.3 *** A0A314LEB5_NICAT)
Solyc12g062860	Adenine nucleotide alpha hydrolases-like superfamily protein (AHRD V3.3 *** Q9LYJ2_ARATH)
Solyc12g062340	Unknown protein
Solyc12g062250	Phosphoglucan phosphatase LSF1, chloroplastic (AHRD V3.3 *** A0A1U8GMC0_CAPAN)
Solyc12g042830	Class I heat shock protein (AHRD V3.3 *-* A0A2U1P7Z6_ARTAN)
Solyc12g042010	transcription factor IBH1-like (AHRD V3.3 *** A0A2I4G0N0_9ROSI)
Solyc12g039120	40S ribosomal protein S19 (AHRD V3.3 *** A0A1U8G3N2_CAPAN)
Solyc12g038970	Agmatine deiminase (AHRD V3.3 *** A0A1U8EXZ9_CAPAN)
Solyc12g038080	Photosystem II CP43 reaction center protein (AHRD V3.3 *-* A0A220NAN4_9BRAS)
Solyc12g036650	hypothetical protein (AHRD V3.3 *** AT3G02555.2)
Solyc12g035670	SAC3/GANP/Nin1/mts3/eIF-3 p25 (AHRD V3.3 *** A0A200QLU7_9MAGN)
Solyc12g035490	Zn-dependent exopeptidases superfamily protein (AHRD V3.3 *-* F4HRW2_ARATH)
Solyc12g035430	Alpha-N-acetylglucosaminidase (AHRD V3.3 *-* Q9ZR45_TOBAC)
Solyc12g035190	Anthranilate phosphoribosyltransferase (AHRD V3.3 *** A0A2U1N166_ARTAN)
Solyc12g027580	Exportin-4 (AHRD V3.3 *** A0A1J3GJA6_NOCCA)
Solyc12g021180	Dual specificity phosphatase (AHRD V3.3 *** A0A200PUY3_9MAGN)
Solyc12g021160	Unknown protein
Solyc12g020110	SNF2_N domain-containing protein/Helicase_C domain-containing protein/HIRAN domain-containing protein/zf-C3HC4_2 domain-containing protein (AHRD V3.3 *** A0A1Q3CI53_CEPFO)
Solyc12g017450	Ubiquitin-specific protease family C19 protein (AHRD V3.3 *** A0A2K3NKS0_TRIPR)
Solyc12g014020	Nucleic acid-binding%2C OB-fold-like protein (AHRD V3.3 *** AT5G63690.2)
Solyc12g013970	Protein kinase domain (AHRD V3.3 *** A0A200QT30_9MAGN)
Solyc12g013510	Histone H2B (AHRD V3.3 *** A0A328DBY2_9ASTE)
Solyc12g009490	ethylene-responsive transcription factor WIN1-like (AHRD V3.11 *** tr|A0A2I4GTJ5|A0A2I4GTJ5_9ROSI)
Solyc12g006805	SOUL heme-binding family protein (AHRD V3.11 *** tr|Q8VZ90|Q8VZ90_ARATH)
Solyc12g006460	Cytochrome P450 (AHRD V3.3 *** A0A200PPF3_9MAGN)
Solyc12g005780	traB domain-containing protein-like (AHRD V3.3 *** A0A2I4HRB9_9ROSI)
Solyc11g072640	Zinc-binding dehydrogenase (AHRD V3.3 *** A0A162PTR1_9PEZI)
Solyc11g072470	LOB domain-containing protein (AHRD V3.3 *** A0A2K3PP50_TRIPR)
Solyc11g072220	Ubiquitin-like-specific protease 1D (AHRD V3.3 *-* A0A1J3EWQ3_NOCCA)
Solyc11g071920	Serine/threonine-protein phosphatase (AHRD V3.3 *** A0A2G2VPQ2_CAPBA)
Solyc11g071420	CC-NBS-LRR type resistance protein (AHRD V3.11 *** tr|E3W9R5|E3W9R5_CAPCH)
Solyc11g069340	Zinc finger transcription factor 69
Solyc11g069320	F-box/kelch-repeat protein (AHRD V3.3 *** A0A1J3IN02_NOCCA)
Solyc11g069160	SUMO E3 ligase SI.1
Solyc11g067140	DNA polymerase epsilon catalytic subunit (AHRD V3.3 *** A0A2G2VQQ6_CAPBA)
Solyc11g066280	ribosome production factor.1
Solyc11g066070	hypothetical protein (AHRD V3.3 *** AT1G47278.3)
Solyc11g045610	Cyclin-dependent kinase C.1
Solyc11g045110	Sucrose-phosphate synthase family protein (AHRD V3.3 *** A0A2U1M1C4_ARTAN)
Solyc11g044910	Beta-D-xylosidase 4 (AHRD V3.3 *** A0A2G2VN32_CAPBA)
Solyc11g042560	Ethylene-responsive transcription factor (AHRD V3.3 *** A0A1U8GKH8_CAPAN)
Solyc11g040085	Unknown protein
Solyc11g030600	cytosine-5 DNA methyltransferase
Solyc11g022590	trypsin inhibitor-like protein precursor
Solyc11g020710	cytochrome C oxidase biogenesis Cmc1-like protein (AHRD V3.3 *** AT1G31175.2)
Solyc11g012140	Isoleucine--tRNA ligase, cytoplasmic (AHRD V3.3 *** A0A2G2VDD1_CAPBA)
Solyc11g012020	EH domain-containing protein.1
Solyc11g011840	Oxidoreductase (AHRD V3.3 *** A0A200R904_9MAGN)
Solyc11g010370	ENTH/ANTH/VHS superfamily protein (AHRD V3.3 *** A0A2U1QGP5_ARTAN)
Solyc11g008360	Pseudouridine synthase family protein (AHRD V3.3 *** A0A1P8AXV3_ARATH)
Solyc11g006730	Germin (AHRD V3.3 *** A0A200QHW9_9MAGN)
Solyc11g006360	E3 ubiquitin-protein ligase (AHRD V3.3 *-* AT3G19990.2)
Solyc10g084970	TIP41-like protein (AHRD V3.3 *-* Q84JE0_ARATH)
Solyc10g074785	Unknown protein
Solyc10g074690	retinal-binding protein (AHRD V3.3 *** AT5G01010.5)
Solyc10g062180	RNA binding protein (AHRD V3.3 *-* A0A2K3MUE2_TRIPR)
Solyc10g062160	Dynamin (AHRD V3.3 *** E5GB64_CUCME)
Solyc10g062130	Unknown protein
Solyc10g061960	phosphatidylinositol 4-phosphate 5-kinase 4-like (AHRD V3.3 *-* A0A2I4G100_9ROSI)
Solyc10g055670	Vacuolar ATP synthase subunit B (AHRD V3.3 *** A0A2P6TTB9_CHLSO)
Solyc10g054930	magnesium transporter NIPA (DUF803) (AHRD V3.3 *** AT4G13800.8)
Solyc10g054030	RING/U-box superfamily protein (AHRD V3.3 *** Q8L7K7_ARATH)
Solyc10g054010	BZIP transcription factor (AHRD V3.3 *** Q8GTZ1_CAPCH)
Solyc10g050430	transmembrane protein 45B-like (AHRD V3.3 *** A0A2I4GRL3_9ROSI)
Solyc10g050060	C2 domain-containing protein (AHRD V3.3 *** B1Q483_CAPCH)
Solyc10g049970	Kynurenine formamidase (AHRD V3.3 *** A0A1J3JDK4_NOCCA)
Solyc10g049600	3-oxo-Delta(4,5)-steroid 5-beta-reductase (AHRD V3.3 *** A0A2G3BY50_CAPCH)
Solyc10g049270	Serine carboxypeptidase (AHRD V3.3 *** A0A2U1P833_ARTAN)
Solyc10g045490	Plant organelle RNA recognition domain-containing protein (AHRD V3.3 *-* A0A2U1N2X7_ARTAN)
Solyc10g045420	O-fucosyltransferase (AHRD V3.3 *** A0A2P5FQR3_TREOI)
Solyc10g045290	Kinase interacting (KIP1-like) family protein (AHRD V3.3 *** A0A2K3NUK8_TRIPR)
Solyc10g044840	YacP-like NYN domain protein (AHRD V3.3 *** F4IQD4_ARATH)
Solyc10g039360	DUF1639 domain-containing protein (AHRD V3.3 *-* A0A1Q3BZV8_CEPFO)
Solyc10g038190	Protein kinase G11A (AHRD V3.3 *** A0A2G2XSC6_CAPBA)
Solyc10g038110	Coatomer subunit delta (AHRD V3.3 *-* A0A2G2W8M4_CAPBA)
Solyc10g024495	Cyclin-A1.1
Solyc10g024490	Protein NRT1/ PTR FAMILY 7.3 (AHRD V3.3 *** A0A2G2YL05_CAPAN)
Solyc10g024470	Chromo domain protein LH.1
Solyc10g024430	Unknown protein
Solyc10g011660	Auxin-responsive GH3 family protein (AHRD V3.3 *** A0A2U1NZC8_ARTAN)
Solyc10g008460	lanC-like protein GCR2 (AHRD V3.3 *** A0A2I4H4K5_9ROSI)
Solyc10g008340	DUF14.1
Solyc10g005930	Histidine biosynthesis bifunctional protein hisIE (AHRD V3.3 *** B6TR63_MAIZE)
Solyc09g092520	xyloglucan endotransglycosylase
Solyc09g090570	Proton gradient regulation 5 (AHRD V3.3 *** A0A2U1Q6W9_ARTAN)
Solyc09g089870	bHLH transcription factor 061
Solyc09g083420	CWF19-like protein 2 (AHRD V3.3 *** A0A1J3GT59_NOCCA)
Solyc09g076040	XS domain (AHRD V3.3 *** A0A200Q4P1_9MAGN)
Solyc09g075280	Exocyst complex component (AHRD V3.3 *** A0A2G2W0K7_CAPBA)
Solyc09g072620	Glutathione gamma-glutamylcysteinyltransferase.1
Solyc09g066210	F-box/kelch-repeat protein OR23 (AHRD V3.3 *** A0A1U8G316_CAPAN)
Solyc09g063030	CLIP-associated protein (AHRD V3.3 *** A0A2G2WGM7_CAPBA)
Solyc09g061710	Alba DNA/RNA-binding protein (AHRD V3.3 *-* A0A1I9LSC0_ARATH)
Solyc09g057710	Basic helix-loop-helix (BHLH) DNA-binding superfamily protein (AHRD V3.11 *** tr|A0A2U1LGQ8|A0A2U1LGQ8_ARTAN)
Solyc09g056450	RING-type E3 ubiquitin transferase (AHRD V3.3 *** A0A2G3BL85_CAPCH)
Solyc09g055765	transcription factor IBH1-like (AHRD V3.11 *** tr|A0A2I4G0N0|A0A2I4G0N0_9ROSI)
Solyc09g055710	Unknown protein
Solyc09g055570	GPCR kinase (AHRD V3.3 *** A0A2P5AIX2_TREOI)
Solyc09g055340	MAU2 chromatid cohesion factor homolog (AHRD V3.3 *** A0A2I4EFQ8_9ROSI)
Solyc09g042780	Unknown protein
Solyc09g042750	Acyl-coenzyme A thioesterase 9, mitochondrial (AHRD V3.3 *** A0A1J3CD94_NOCCA)
Solyc09g042710	Weak chloroplast movement under blue light protein (DUF827) (AHRD V3.3 *** A0A1P8AX38_ARATH)
Solyc09g042670	Unknown protein
Solyc09g031920	Late embryogenesis abundant protein, LEA-14 (AHRD V3.3 *** A0A2U1NFB4_ARTAN)
Solyc09g031650	Mediator of RNA polymerase II transcription subunit 12-like protein (AHRD V3.3 *-* A0A2K3MW60_TRIPR)
Solyc09g031600	Sorting nexin 2A (AHRD V3.3 *** A0A2G3BLH8_CAPCH)
Solyc09g030370	GDSL esterase/lipase (AHRD V3.3 *** A0A1U8E6M9_CAPAN)
Solyc09g018830	MLO-like protein (AHRD V3.3 *** M1BT43_SOLTU)
Solyc09g018340	ARM repeat superfamily protein (AHRD V3.3 *-* A0A2U1MSZ7_ARTAN)
Solyc09g015650	Non-green plastid inner envelope membrane protein (AHRD V3.3 *** B6T177_MAIZE)
Solyc09g015520	Leucine-rich repeat receptor-like protein kinase PXC2 (AHRD V3.3 *** A0A1U8ED78_CAPAN)
Solyc09g013070	Steroid 5-alpha-reductase DET2 (AHRD V3.3 *-* A0A1U8EBY8_CAPAN)
Solyc09g011030	Hsp70 nucleotide exchange factor FE.1
Solyc09g010980	cyclin-dependent kinase inhibitor (AHRD V3.3 -** AT5G02220.1)
Solyc09g010880	Rhomboid-like protein (AHRD V3.3 *** A0A1U8EGH3_CAPAN)
Solyc09g009710	Transducin/WD40 repeat-like superfamily protein (AHRD V3.11 *** tr|A0A2U1LQW0|A0A2U1LQW0_ARTAN)
Solyc09g007340	Tudor/PWWP/MBT superfamily protein (AHRD V3.11 *-* tr|Q9SF36|Q9SF36_ARATH)
Solyc09g005730	Plant protein 1589 of Uncharacterized protein function (AHRD V3.3 *** A0A061EZD3_THECC)
Solyc08g080180	Molybdenum cofactor sulfurase-like protein (AHRD V3.3 *** A0A2K3L0M9_TRIPR)
Solyc08g078080	Pentatricopeptide repeat-containing protein, mitochondrial (AHRD V3.3 *** A0A2G3DC53_CAPCH)
Solyc08g075570	Urea-proton symporter DUR3 (AHRD V3.3 *** A0A2G3AG00_CAPAN)
Solyc08g074370	DDB1-and CUL4-associated factor-like protein.1
Solyc08g067960	CHY-type/CTCHY-type/RING-type Zinc finger protein (AHRD V3.3 *** A0A2U1Q2D4_ARTAN)
Solyc08g067020	Cytochrome b-c1 complex subunit 7 (AHRD V3.11 *** tr|A0A1U8E2B0|A0A1U8E2B0_CAPAN)
Solyc08g066870	Casein kinase I isoform delta (AHRD V3.3 *** A0A2G2W5P3_CAPBA)
Solyc08g066770	Ankyrin repeat (AHRD V3.3 *** A0A200QDM7_9MAGN)
Solyc08g066390	SAWADEE HOMEODOMAIN protein (AHRD V3.3 *** A0A178W211_ARATH)
Solyc08g065850	Unknown protein
Solyc08g065320	green ripe-like 1
Solyc08g061843	40S ribosomal protein S3, putative, expressed (AHRD V3.3 *** Q75G91_ORYSJ)
Solyc08g061590	Pentatricopeptide repeat-containing protein (AHRD V3.11 *** tr|A0A2G2VV98|A0A2G2VV98_CAPBA)
Solyc08g061140	protein OVEREXPRESSOR OF CATIONIC PEROXIDASE 3 (AHRD V3.3 *** A0A2I4E0E9_9ROSI)
Solyc08g060940	Nucleotide-sugar transporter family protein (AHRD V3.3 *** A0A2U1NGQ1_ARTAN)
Solyc08g059800	TPX2 (Targeting protein for Xklp2) family protein (AHRD V3.3 *** A0A2K3NRR7_TRIPR)
Solyc08g059710	EEIG1/EHB.1
Solyc08g048430	F-box protein (AHRD V3.3 *** A0A2G3BRT0_CAPCH)
Solyc08g048250	Peroxisomal (S)-2-hydroxy-acid oxidase GL.1
Solyc08g045850	Pentatricopeptide repeat (AHRD V3.3 *** A0A200RA18_9MAGN)
Solyc08g044345	Prefoldin chaperone subunit family protein (AHRD V3.3 *** AT1G49245.1)
Solyc08g043180	Photosystem II reaction center PsbP family protein (AHRD V3.3 *** A0A0F7GYT8_9ROSI)
Solyc08g042050	RNA helicase DEAD25
Solyc08g036660	Jasmonate ZIM domain protein f (AHRD V3.11 *** tr|I3WTA4|I3WTA4_NICAT)
Solyc08g028780	DUF868 domain-containing protein (AHRD V3.3 *** A0A1Q3AW51_CEPFO)
Solyc08g016808	Aladin (AHRD V3.11 *** tr|A0A1J3HAH8|A0A1J3HAH8_NOCCA)
Solyc08g016720	9-cis-epoxycarotenoid dioxygenase2
Solyc08g016220	Receptor like protein (AHRD V3.3 *** A0A1S8AD65_CITLI)
Solyc08g016150	Avr9/Cf-9 rapidly elicited protein 180 (AHRD V3.3 *** Q9FQZ1_TOBAC)
Solyc08g014150	C2 domain-containing protein/GRAM domain-containing protein (AHRD V3.11 *** tr|A0A1Q3BEV5|A0A1Q3BEV5_CEPFO)
Solyc08g005700	Unknown protein
Solyc07g150120	Unknown protein
Solyc07g150116	Unknown protein
Solyc07g064690	50S ribosomal protein L34 (AHRD V3.3 *** AT1G29040.1)
Solyc07g064650	Senescence regulator S40 (AHRD V3.3 *** A0A200PYV8_9MAGN)
Solyc07g061935	C2 domain-containing protein (AHRD V3.3 *-* A0A2G2Z4M9_CAPAN)
Solyc07g056050	Transmembrane 9 superfamily member (AHRD V3.3 *** A0A2G2Z4P1_CAPAN)
Solyc07g054800	Wound induced protein (AHRD V3.3 *** Q04129_SOLLC)
Solyc07g054745	Wound-responsive family protein Chr4:6374805-6375077 FORWARD LENGTH=90 201606 (AHRD V3.11 --* AT4G10270.1)
Solyc07g053870	Switch 2 (AHRD V3.11 *** tr|A0A1U8HBI7|A0A1U8HBI7_CAPAN)
Solyc07g053735	Unknown protein
Solyc07g052420	hexokinase.1
Solyc07g051850	aspartic proteinase-like (AHRD V3.3 *** A0A2I4H0Z7_9ROSI)
Solyc07g047690	DnaJ domain-containing protein (AHRD V3.3 *** A0A2U1M065_ARTAN)
Solyc07g042260	Auxin Response Factor 7
Solyc07g042230	Ethylene-responsive transcription factor (AHRD V3.3 *-* A0A2G2WJA8_CAPBA)
Solyc07g040950	Lactoylglutathione lyase / glyoxalase I family protein (AHRD V3.3 *** A0A1Y1IMJ5_KLENI)
Solyc07g039550	RNA helicase DEAH-box21
Solyc07g039380	bromodomain protein (DUF761) (AHRD V3.3 *-* AT2G26110.1)
Solyc07g039320	WD-40 repeat-containing protein MSI4 (AHRD V3.3 *-* A0A2G2Z1C5_CAPAN)
Solyc07g037950	ectonucleotide pyrophosphatase/phosphodiesterase family member 3 (AHRD V3.3 *** A0A2I4GPP6_9ROSI)
Solyc07g032740	Aspartate aminotransferase (AHRD V3.3 *** A0A0J8BGE0_BETVU)
Solyc07g032510	Forkhead-associated (FHA) domain (AHRD V3.3 *** A0A200QTD2_9MAGN)
Solyc07g032480	cyclinT1_2
Solyc07g032380	Pentatricopeptide repeat-containing protein (AHRD V3.3 *** A0A2G2Z1L2_CAPAN)
Solyc07g032250	nucleophosmin (AHRD V3.3 *** AT4G29520.1)
Solyc07g032230	Regulator of Vps4 activity in the MVB pathway protein (AHRD V3.3 *-* F4ITF9_ARATH)
Solyc07g032170	1-acylglycerol-3-phosphate O-acyltransferase (AHRD V3.3 *-* A0A2G2YMS0_CAPAN)
Solyc07g032100	Coatomer subunit alpha (AHRD V3.3 *** A0A2G2Z2H7_CAPAN)
Solyc07g025380	DNA ligase-like protein (AHRD V3.3 *** AT1G75150.3)
Solyc07g025370	Cytochrome P450 (AHRD V3.3 *** A0A200R7I2_9MAGN)
Solyc07g025170	Exocyst complex component SEC3A (AHRD V3.3 *** A0A2G3C6V7_CAPCH)
Solyc07g024000	NAD(P)-binding Rossmann-fold superfamily protein (AHRD V3.3 *** F4JSA6_ARATH)
Solyc07g022760	Pre-mRNA-processing protein 40A (AHRD V3.11 *** tr|A0A2G2XIJ4|A0A2G2XIJ4_CAPBA)
Solyc07g021630	SlBCAT2
Solyc07g021620	Pentatricopeptide repeat (AHRD V3.3 *** A0A200QLP1_9MAGN)
Solyc07g021550	Protein EFFECTOR OF TRANSCRIPTION 2 (AHRD V3.3 *** ET2_ARATH)
Solyc07g021540	GRAM domain-containing protein (AHRD V3.3 *** A0A1Q3BG17_CEPFO)
Solyc07g016150	ripening regulated protein DDTFR10
Solyc07g007930	Raffinose synthase family protein (AHRD V3.3 *** F4K470_ARATH)
Solyc07g007370	Ubiquitin-associated (UBA)/TS-N domain-containing protein (AHRD V3.3 *** A0A2U1MD44_ARTAN)
Solyc07g006820	Transcription initiation factor TFIID subunit.1
Solyc07g006100	Oxysterol-binding protein-related protein 1D (AHRD V3.3 *** A0A2G3BX83_CAPCH)
Solyc07g005440	Non-specific serine/threonine protein kinase (AHRD V3.3 *** A0A2G2WAR5_CAPBA)
Solyc06g083460	Transcriptional corepressor LEUNIG (AHRD V3.3 *** A0A1U8H8S8_CAPAN)
Solyc06g071850	Tetratricopeptide repeat (TPR)-containing protein (AHRD V3.3 *** Q67YJ9_ARATH)
Solyc06g071720	60S ribosomal protein L27a (AHRD V3.3 *** A0A1U8H4G8_CAPAN)
Solyc06g069440	Zinc finger transcription factor 45
Solyc06g069030	microbial collagenase (AHRD V3.3 *** AT1G18060.1)
Solyc06g068540	ATP-dependent DNA helicase (AHRD V3.3 *** Q9ZUI1_ARATH)
Solyc06g067970	DUF1644 domain-containing protein (AHRD V3.3 *-* A0A1Q3BXX3_CEPFO)
Solyc06g062780	Phospholipid-transporting ATPase (AHRD V3.3 *** A0A2G2WKW9_CAPBA)
Solyc06g060230	NAC domain-containing protein (AHRD V3.3 *** A0A2K3N804_TRIPR)
Solyc06g054220	Unknown protein
Solyc06g048510	WD-40 repeat containing protein (AHRD V3.11 *** tr|A0A0K0XR03|A0A0K0XR03_TOBAC)
Solyc06g036590	protein RDM16-like isoform .1
Solyc06g035720	BAG family molecular chaperone regulator.1
Solyc06g034390	Protein EXORDIUM-like 7 (AHRD V3.3 *** A0A2G2X692_CAPBA)
Solyc06g031716	Unknown protein
Solyc06g030570	Dual-specificity RNA methyltransferase RlmN (AHRD V3.3 *** A0A318RXP5_9GAMM)
Solyc06g030470	UPSTREAM OF FLC protein (DUF966) (AHRD V3.3 *** Q8GYT8_ARATH)
Solyc06g019200	Ethylene-dependent gravitropism-deficient and yellow-green-like 2 (AHRD V3.3 *** F4K0T6_ARATH)
Solyc06g019170	Delta-1-pyrroline-5-carboxylate synthase (AHRD V3.3 *** A0A0U1XEG4_LYCCN)
Solyc06g010030	MLO-like protein (AHRD V3.3 *** K4C430_SOLLC)
Solyc06g009810	ethylene-responsive transcription factor CRF1 (AHRD V3.11 --* XP_004245542.1)
Solyc06g008210	Protein BREAST CANCER SUSCEPTIBILITY 1-like protein (AHRD V3.11 *** tr|A0A1J3HZN2|A0A1J3HZN2_NOCCA)
Solyc06g007130	omega-3 fatty acid desaturase -3
Solyc06g005600	scarecrow-like transcription factor .1
Solyc06g005430	Histone H4 (AHRD V3.3 *-* F2E7L1_HORVV)
Solyc05g056320	Smr (Small MutS-related) domain protein (AHRD V3.3 *** A0A2K3NNB3_TRIPR)
Solyc05g054940	Nitrilase-like protein.1
Solyc05g052650	HXXXD-type acyl-transferase family protein (AHRD V3.11 *-* tr|V5PZN5|V5PZN5_9CARY)
Solyc05g051900	Major facilitator superfamily (AHRD V3.3 *** A0A200QUR2_9MAGN)
Solyc05g046140	Kirola (AHRD V3.3 *** A0A2G3B0M8_CAPCH)
Solyc05g044620	Unknown protein
Solyc05g032850	Evolutionarily conserved C-terminal region 2 (AHRD V3.3 *** F4JDC2_ARATH)
Solyc05g032750	protein PLASTID MOVEMENT IMPAIRED 1-RELATED.1
Solyc05g026550	NADH dehydrogenase-like complex L (AHRD V3.3 *** A0A0F7CYX9_9ROSI)
Solyc05g026310	Derlin (AHRD V3.3 *** A0A2G3CG93_CAPCH)
Solyc05g025500	Glucan endo-1,3-beta-glucosidase 5 (AHRD V3.3 *** A0A2G2ZI86_CAPAN)
Solyc05g024010	Zinc finger protein CONSTANS-LIKE 15 (AHRD V3.3 *** A0A2G2VMU9_CAPBA)
Solyc05g020020	Zinc finger protein CONSTANS-LIKE 9 (AHRD V3.3 *** A0A2G3BZP6_CAPCH)
Solyc05g018810	Nucleosome assembly protein family (AHRD V3.11 *** tr|A9TVZ4|A9TVZ4_PHYPA)
Solyc05g018340	Zinc finger Ran-binding domain-containing protein 2 (AHRD V3.3 *** A0A2G3CGD8_CAPCH)
Solyc05g018120	Transcription initiation factor TFIID subunit .1
Solyc05g016380	Rhomboid-like protein 14 (AHRD V3.3 *** A0A2K3N0Y0_TRIPR)
Solyc05g015710	transmembrane protein (AHRD V3.3 *** AT1G27290.2)
Solyc05g015520	F-box family protein (AHRD V3.3 *** B8Y9B5_PONTR)
Solyc05g014490	Pentatricopeptide repeat (AHRD V3.3 *** A0A200RCQ9_9MAGN)
Solyc05g014400	RecQ-mediated genome instability protein.1
Solyc05g014120	S-adenosyl-L-methionine-dependent methyltransferases superfamily protein (AHRD V3.3 *** A0A2U1MVU3_ARTAN)
Solyc05g009950	Cytochrome b5.1
Solyc05g008420	Tetratricopeptide repeat protein 5 (AHRD V3.3 *** A0A2U1PT40_ARTAN)
Solyc05g007740	Pentatricopeptide repeat-containing protein (AHRD V3.3 *** A0A2G3B7P9_CAPCH)
Solyc05g006330	Unknown protein
Solyc05g005860	WAT1-related protein (AHRD V3.3 *** K4BWB3_SOLLC)
Solyc04g150162	Vacuolar iron transporter-like protein 4 (AHRD V3.3 *** A0A2G3CN36_CAPCH)
Solyc04g081240	Auxin Response Factor 5
Solyc04g079860	Hexosyltransferase (AHRD V3.3 *** A0A2G2ZRY0_CAPAN)
Solyc04g078900	ABA 8'-hydroxylase
Solyc04g078640	Ethylene-responsive transcription factor RAP2.1
Solyc04g078460	Isoaspartyl peptidase/L-asparaginase (AHRD V3.3 *** A0A1U8GBV5_CAPAN)
Solyc04g076920	beta3-glucuronyltransferase
Solyc04g076660	Rhamnogalacturonate lyase family protein (AHRD V3.3 *** A0A2U1NT41_ARTAN)
Solyc04g076540	HYPERSENSITIVE TO PI STARVATION 4 (AHRD V3.3 *** F4I9T6_ARATH)
Solyc04g074580	Histone H3 (AHRD V3.3 *** A0A2K1J132_PHYPA)
Solyc04g072910	Endoplasmic reticulum-Golgi intermediate compartment protein 3 (AHRD V3.3 *** A0A2G3CNL7_CAPCH)
Solyc04g072900	dehydration-responsive element binding protein 3
Solyc04g072800	2,3-bisphosphoglycerate-dependent phosphoglycerate mutase (AHRD V3.3 *** A0A2G3CNK4_CAPCH)
Solyc04g071710	Protein LIKE COV 2 (AHRD V3.11 *** tr|A0A2G3CMU5|A0A2G3CMU5_CAPCH)
Solyc04g071040	Regulator of chromosome condensation (RCC1) family protein (AHRD V3.3 *** A0A1P8B4Z7_ARATH)
Solyc04g055060	serine/threonine-protein phosphatase 7 long form homolog (AHRD V3.3 *-* XP_019066952.1)
Solyc04g054930	Trehalose 6-phosphate phosphatase (AHRD V3.3 *** A0A2G3B2U1_CAPCH)
Solyc04g051690	WRKY transcription factor 51
Solyc04g051490	Crossover junction endonuclease EME1B (AHRD V3.3 *** A0A2G2VFP4_CAPBA)
Solyc04g051350	Ribonucleoside-diphosphate reductase (AHRD V3.3 *** A0A2G3BE96_CAPCH)
Solyc04g049840	RNA binding (RRM/RBD/RNP motifs) family protein (AHRD V3.3 *-* Q9M1E4_ARATH)
Solyc04g049680	Pseudo-response regulator (AHRD V3.3 *-* X5I0R0_IPONI)
Solyc04g049120	Nuclear receptor corepressor.1
Solyc04g049070	alpha glucosidase II
Solyc04g047770	VHS domain-containing protein (AHRD V3.3 *** A0A2G2ZIB2_CAPAN)
Solyc04g047750	Alpha-taxilin (AHRD V3.3 *** A0A1J3J675_NOCCA)
Solyc04g045660	DNA mismatch repair protein (AHRD V3.11 *** tr|A0A200RE05|A0A200RE05_9MAGN)
Solyc04g045650	Exostosin-like protein (AHRD V3.3 *** A0A2U1PVZ1_ARTAN)
Solyc04g039730	protein NSP-INTERACTING KINASE 3-like (AHRD V3.3 *** A0A1S3ZQ35_TOBAC)
Solyc04g026360	AP.1
Solyc04g025610	Unknown protein
Solyc04g025530	Glutamate decarboxylase (AHRD V3.3 *** A0A2G2YVX0_CAPAN)
Solyc04g024960	Unknown protein
Solyc04g024520	hypothetical protein (AHRD V3.3 *** AT5G13310.2)
Solyc04g024420	Proteasome subunit beta (AHRD V3.3 *** A0A2G2VMP0_CAPBA)
Solyc04g017700	N-acetylglucosaminyl transferase component family protein / Gpi1 family protein (AHRD V3.11 *** tr|F4J262|F4J262_ARATH)
Solyc04g016180	Glycosyltransferase (AHRD V3.3 *** A0A2K3N592_TRIPR)
Solyc04g015360	GATA transcription factor (AHRD V3.3 *** K4BQ39_SOLLC)
Solyc04g015160	C2 and GRAM domain-containing protein (AHRD V3.3 *** A0A2G2ZFB6_CAPAN)
Solyc04g014740	BAG family molecular chaperone regulator 5, mitochondrial (AHRD V3.3 *** A0A2G3CDN3_CAPCH)
Solyc04g014570	Transmembrane 9 superfamily member (AHRD V3.3 *** A0A2G3CDP8_CAPCH)
Solyc04g012120	SIG5 14-3-3 family protein
Solyc04g011550	pheromone-processing carboxypeptidase KEX1-like (AHRD V3.3 --* XP_022740211.1)
Solyc04g007660	NHL domain-containing protein (AHRD V3.3 *** Q9ZNQ5_ARATH)
Solyc03g123370	GTP pyrophosphokinase, (P)ppGpp synthetase II Guanosine-3',5'-bis(Diphosphate) 3'-pyrophosphohydrolase (AHRD V3.3 *-* A0A2D1JZR2_9GAMM)
Solyc03g122310	Aldehyde dehydrogenase (AHRD V3.3 *** Q69P84_ORYSJ)
Solyc03g121180	GDSL esterase/lipase (AHRD V3.3 *** A0A2G3D0P9_CAPCH)
Solyc03g120120	Regulator of Vps4 activity in the MVB pathway protein (AHRD V3.3 *-* Q8L402_ARATH)
Solyc03g119950	Pentatricopeptide repeat-containing protein, chloroplastic (AHRD V3.3 *** A0A2G2WPP9_CAPBA)
Solyc03g118040	calnexin
Solyc03g116880	DNA-3-methyladenine glycosylase I (AHRD V3.3 *** A0A2I0X0X0_9ASPA)
Solyc03g115180	RING/FYVE/PHD zinc finger superfamily protein (AHRD V3.3 *-* F4KE59_ARATH)
Solyc03g114710	Glycosyltransferase (AHRD V3.3 *** A0A328DB01_9ASTE)
Solyc03g113590	5-formyltetrahydrofolate cycloligase
Solyc03g110930	30S ribosomal protein S21, chloroplastic (AHRD V3.3 *-* A0A2G3CY41_CAPCH)
Solyc03g098280	Argonaute 1b
Solyc03g096220	tRNA-splicing endonuclease subunit (AHRD V3.3 *-* F4J8D6_ARATH)
Solyc03g095200	Pentatricopeptide repeat (AHRD V3.3 *** A0A200Q2K1_9MAGN)
Solyc03g093540	Ethylene-responsive transcription factor 5 (AHRD V3.3 *** ERF5_TOBAC)
Solyc03g083400	CCT motif protein (AHRD V3.3 *** A0A2K3PQC2_TRIPR)
Solyc03g083190	gamma-irradiation and mitomycin c induced.1
Solyc03g078780	UDP-glycosyltransferase 76C4-like (AHRD V3.3 *** A0A2I4EQP1_9ROSI)
Solyc03g071570	Pectate lyase (AHRD V3.3 *** A0A2G2X594_CAPBA)
Solyc03g065340	Alpha-1,4 glucan phosphorylase (AHRD V3.3 *** A0A2G3CMG9_CAPCH)
Solyc03g065250	Fatty acid hydroxylase superfamily (AHRD V3.3 *** A0A2U1L8N4_ARTAN)
Solyc03g064030	Alpha/beta hydrolase family protein (AHRD V3.3 *** Q8RWA3_ARATH)
Solyc03g063450	Proteasome subunit beta (AHRD V3.3 *-* A0A2G3CJ01_CAPCH)
Solyc03g059260	Carboxyl-terminal-processing protease (AHRD V3.3 *** B6T6L2_MAIZE)
Solyc03g059250	Serine/threonine-protein kinase Nek6 (AHRD V3.3 *** A0A2G2ZY51_CAPAN)
Solyc03g058390	Eukaryotic translation initiation factor 5B (AHRD V3.11 *** tr|A0A2G2WJG0|A0A2G2WJG0_CAPBA)
Solyc03g053080	Kinesin (AHRD V3.3 *** A0A200RDE4_9MAGN)
Solyc03g051920	DUF620 domain-containing protein (AHRD V3.11 *** tr|A0A1Q3D1F8|A0A1Q3D1F8_CEPFO)
Solyc03g044300	APETALA2a
Solyc03g026270	CRT binding factor 3 (AHRD V3.3 *** B3TPP7_SOLPI)
Solyc03g026100	tRNA-specific adenosine deaminase TAD3 (AHRD V3.3 *** TAD3_ARATH)
Solyc03g025350	Transporter arsB (AHRD V3.3 *** A0A2U1Q5Y3_ARTAN)
Solyc03g007310	Abscisic acid receptor PYL8 (AHRD V3.3 *** A0A2G3CWW8_CAPCH)
Solyc03g007260	Cyclic nucleotide-gated ion channel.1
Solyc02g093750	C3H4 type zinc finger protein (DUF23) (AHRD V3.3 *** Q9FM26_ARATH)
Solyc02g092930	R2R3MYB transcription factor 44
Solyc02g092220	Unknown protein
Solyc02g091700	Hydroxyproline-rich glycoprotein (AHRD V3.3 *** A0A2K3L507_TRIPR)
Solyc02g090990	MAP kinase kinase kinase 23
Solyc02g090980	MAP kinase kinase kinase 22
Solyc02g090760	hypothetical protein (AHRD V3.3 *-* AT3G50370.2)
Solyc02g089630	Proline dehydrogenase (AHRD V3.3 *** A0A2G2XIU2_CAPBA)
Solyc02g086970	Aldehyde dehydrogenase (AHRD V3.3 *** A0A2U1MUY7_ARTAN)
Solyc02g085520	Adenylosuccinate synthetase (AHRD V3.3 *** S8CIB7_9LAMI)
Solyc02g085180	alpha/beta fold family protein
Solyc02g085130	Tubby-like F-box protein (AHRD V3.3 *** A0A2G3D7T8_CAPCH)
Solyc02g084890	Disease resistance RPP13-like protein 4 (AHRD V3.3 *** A0A2G2XGN6_CAPBA)
Solyc02g084480	golgin candidate 6-like isoform X2 (AHRD V3.3 *-* XP_025885295.1)
Solyc02g084450	NBS-LRR resistance protein (AHRD V3.3 *** A0A2K3NU03_TRIPR)
Solyc02g083900	Transformation/transcription domain associated protein (AHRD V3.3 *** A0A2K3NKS8_TRIPR)
Solyc02g081370	AMP-dependent synthetase/ligase (AHRD V3.3 *** A0A200PYF6_9MAGN)
Solyc02g079530	G-type lectin S-receptor-like serine/threonine-protein kinase (AHRD V3.3 *** A0A2G2VAF6_CAPBA)
Solyc02g078760	hypothetical protein (AHRD V3.3 *** AT1G11125.1)
Solyc02g078230	Callose synthase 12 (AHRD V3.3 *** A0A2G3D663_CAPCH)
Solyc02g077940	Unknown protein
Solyc02g077230	transmembrane protein (AHRD V3.3 *-* AT2G31090.1)
Solyc02g069460	Photosystem I reaction center subunit III, chloroplastic (AHRD V3.3 *** A0A1U8FJA0_CAPAN)
Solyc02g069055	Phloem protein 2-like (AHRD V3.3 *** A0A200QPN3_9MAGN)
Solyc02g068750	tRNA N6-adenosine threonylcarbamoyltransferase (AHRD V3.3 *** A0A2H5UB77_RHIID)
Solyc02g066920	Chlororespiratory reduction 7 (AHRD V3.3 *** A0A2U1NIM3_ARTAN)
Solyc02g065230	Cytochrome P450 (AHRD V3.3 *** A0A1U9X5Y9_THAGA)
Solyc02g065060	Short-chain dehydrogenase/reductase SDR (AHRD V3.3 *** A0A200PU74_9MAGN)
Solyc02g064710	transcriptional regulator of RNA polII%2C SAGA%2C subunit (AHRD V3.3 *** AT4G33890.2)
Solyc02g063490	Malate dehydrogenase (AHRD V3.3 *** A0A2G2XBH7_CAPBA)
Solyc02g062700	ATPase family AAA domain-containing protein 3-like (AHRD V3.3 *** A0A2I4E883_9ROSI)
Solyc02g062540	Thioredoxin domain-containing protein (AHRD V3.3 *** A0A1Q3D5L0_CEPFO)
Solyc02g062490	2-oxoglutarate (2OG) and Fe(II)-dependent oxygenase superfamily protein (AHRD V3.3 *** A0A2U1LXD5_ARTAN)
Solyc02g062290	RNA binding protein (AHRD V3.3 *-* A0A2K3MUE2_TRIPR)
Solyc02g055440	E3 ubiquitin-protein ligase%2C putative (DUF177) (AHRD V3.3 *** AT3G19800.2)
Solyc02g050330	Unknown protein
Solyc02g049070	ribosomal RNA small subunit methyltransferase J Chr5:2763914-2765431 FORWARD LENGTH=346 201606 (AHRD V3.11 *** AT5G08540.1)
Solyc02g038819	Phosphoinositide phosphatase family protein (AHRD V3.3 *** A0A2U1LC37_ARTAN)
Solyc02g023980	ATPase (AHRD V3.11 *** tr|A0A200Q5U6|A0A200Q5U6_9MAGN)
Solyc02g022930	3-hydroxyisobutyrate dehydrogenase (AHRD V3.3 *** A0A1U8FBY0_CAPAN)
Solyc02g021685	Unknown protein
Solyc02g021440	Non-specific serine/threonine protein kinase (AHRD V3.3 *** A0A2G3A4W0_CAPAN)
Solyc02g014250	Disease resistance protein RGA2 (AHRD V3.3 *-* A0A2G2XMC9_CAPBA)
Solyc02g005606	serine/threonine-protein phosphatase 7 long form homolog (AHRD V3.3 *-* XP_019069006.1)
Solyc02g005520	pterin-4-alpha-carbinolamine dehydratase 2, mitochondrial isoform X5 (AHRD V3.3 *-* XP_025884931.1)
Solyc02g005280	Pentatricopeptide repeat (AHRD V3.3 *** A0A200Q5Q8_9MAGN)
Solyc02g005210	Cofactor assembly of complex C (AHRD V3.3 *** A0A2U1QJQ4_ARTAN)
Solyc01g112350	Brefeldin A-inhibited guanine nucleotide-exchange protein 4 (AHRD V3.3 *** A0A2G2XW39_CAPAN)
Solyc01g110450	NAD(P)-linked oxidoreductase superfamily protein (AHRD V3.3 *** A0A2U1PJ17_ARTAN)
Solyc01g108300	Two-component response regulator ARR18 (AHRD V3.3 *** A0A2G2W9W9_CAPBA)
Solyc01g105220	alternative oxidase 2
Solyc01g101240	Aspartic proteinase (AHRD V3.11 *** tr|A0A1U8DV20|A0A1U8DV20_CAPAN)
Solyc01g101010	RNA polymerase II subunit .1
Solyc01g100370	Adenine nucleotide alpha hydrolases-like superfamily protein (AHRD V3.3 *** A0A2U1PDN0_ARTAN)
Solyc01g099840	Dormancy/auxin associated protein (AHRD V3.3 *** A0A2K3MXX9_TRIPR)
Solyc01g098990	DUF1995 domain protein%2C putative (DUF1995) Chr5:9731758-9733644 FORWARD LENGTH=341 201606 (AHRD V3.11 *** AT5G27560.4)
Solyc01g098750	RING/U-box superfamily protein (AHRD V3.11 *** tr|A0A2U1KJJ9|A0A2U1KJJ9_ARTAN)
Solyc01g098410	Lyk13 (AHRD V3.3 *** G3KGB4_SOLLC)
Solyc01g094830	G-type lectin S-receptor-like serine/threonine-protein kinase SD2-2 (AHRD V3.3 *** A0A2G3BSY6_CAPCH)
Solyc01g091520	Enoyl-CoA delta isomerase 1, peroxisomal (AHRD V3.3 *** A0A2G3DDW4_CAPCH)
Solyc01g090380	hypothetical protein (AHRD V3.3 *** AT2G44850.3)
Solyc01g088820	trihelix transcription factor ASIL2-like (AHRD V3.3 *** A0A2I4HF85_9ROSI)
Solyc01g088730	DnaJ domain-containing protein (AHRD V3.3 *** A0A2U1Q731_ARTAN)
Solyc01g087890	Plasma-membrane choline transporter family protein (AHRD V3.3 *** F4K425_ARATH)
Solyc01g081070	Protein transport protein SEC23 (AHRD V3.3 *** A0A2G3ALY9_CAPAN)
Solyc01g079790	Glucose-1-phosphate adenylyltransferase (AHRD V3.11 *** tr|K4AXM4|K4AXM4_SOLLC)
Solyc01g068030	Polyketide cyclase / dehydrase and lipid transport protein (AHRD V3.3 *** Q1G3L2_ARATH)
Solyc01g067510	receptor-like protein kinase FERONIA (AHRD V3.3 *** A0A2I4F2T3_9ROSI)
Solyc01g065550	Dehydration-induced 19-like protein (AHRD V3.3 *** E3T7S4_GOSHI)
Solyc01g065500	C2 calcium/lipid-binding plant phosphoribosyltransferase family protein (AHRD V3.3 *** A0A061EZM2_THECC)
Solyc01g060220	Unknown protein
Solyc01g058270	O-acetyltransferase family protein (AHRD V3.3 *** A0A2U1M4H7_ARTAN)
Solyc01g057910	R2R3MYB transcription factor 2
Solyc01g057760	RNA helicase DEAD2
Solyc01g056810	Syntaxin (AHRD V3.3 *** A0F0A7_NICBE)
Solyc01g056580	L-aspartate oxidase (AHRD V3.3 *-* A0A2G3CUJ1_CAPCH)
Solyc01g028870	Antitermination NusB domain-containing protein (AHRD V3.3 *** Q93XY7_ARATH)
Solyc01g028860	Evolutionarily conserved C-terminal region 2 (AHRD V3.3 *** F4JDC2_ARATH)
Solyc01g028830	Protein kinase domain (AHRD V3.3 *** A0A200R109_9MAGN)
Solyc01g028810	Beta chaperonin 60 (AHRD V3.3 *** Q0W9E2_SOLCO)
Solyc01g028803	Cytochrome P450 (AHRD V3.3 *** A0A200R9G0_9MAGN)
Solyc01g016470	60S acidic ribosomal protein .1
Solyc01g010820	Cullin (AHRD V3.3 *** A0A2U1PKA1_ARTAN)
Solyc01g009990	Peptidyl-prolyl cis-trans isomerase (AHRD V3.3 *** A0A2G3DGA1_CAPCH)
Solyc01g009443	Mitochondrial inner membrane protease ATP23 (AHRD V3.11 *** tr|A0A2G3DGC1|A0A2G3DGC1_CAPCH)
Solyc01g008320	Shoot gravitropism 2 (SGR2) protein (AHRD V3.3 *** A0A072UJS6_MEDTR)
Solyc01g008290	Dihydroorotate dehydrogenase (quinone), mitochondrial (AHRD V3.3 *** A0A1U8E220_CAPAN)
Solyc01g006710	Helicase (AHRD V3.3 *** A0A200PRN8_9MAGN)
Solyc01g005820	Serine/arginine-rich-splicing factor SCL30A (AHRD V3.3 *** A0A0M9UMR8_NICAT)
Solyc01g005110	Dolichol-phosphate mannosyltransferase-related protein (AHRD V3.3 *** A0A2U1LCX2_ARTAN)
Solyc00g500406	Disease resistance protein (TIR-NBS-LRR class) (AHRD V3.3 *-* A0A2K3PDT8_TRIPR)
Solyc00g500290	DNA-directed RNA polymerase subunit beta'' (AHRD V3.11 *** tr|A0A1U8QCC7|A0A1U8QCC7_CAPAN)
Solyc00g500245	Ribosomal protein S3 (AHRD V3.3 *** A0A290WKX3_SOLLC)
Solyc00g500183	NADH dehydrogenase subunit 7 (AHRD V3.3 *-* A0A220T1K3_9ROSI)
Solyc00g500180	Unknown protein
Solyc00g500088	Protein TIC 214 (AHRD V3.11 *** sp|Q2VEC3|TI214_SOLTU)
Solyc00g160780	Gag/pol polyprotein (AHRD V3.11 *-* tr|Q6WAY7|Q6WAY7_PEA)
Solyc00g160770	Gag/pol polyprotein (AHRD V3.11 *-* tr|Q6WAY7|Q6WAY7_PEA)
Solyc00g160130	ATP synthase subunit a (AHRD V3.11 *-* tr|A0A2H4NB24|A0A2H4NB24_SOLLC)
Solyc00g014790	Unknown protein

## Sheet: On gene body DEGs
Gene ID	Description
Solyc05g005860	WAT1-related protein (AHRD V3.3 *** K4BWB3_SOLLC)
Solyc03g119950	Pentatricopeptide repeat-containing protein
Solyc09g083420	CWF19-like protein 2 (AHRD V3.3 *** A0A1J3GT59_NOCCA)
Solyc12g099560	Arginine methyltransferase (AHRD V3.3 *** A0A1Y1HZY4_KLENI)
Solyc12g095980	Late embryogenesis abundant (LEA) hydroxyproline-rich glycoprotein family (AHRD V3.3 *** A0A2U1MMJ0_ARTAN)
Solyc05g056250	Aspartate--tRNA ligase
Solyc02g093060	tRNA-dihydrouridine synthase (AHRD V3.3 *** A0A2G3D8C2_CAPCH)
Solyc05g006650	bHLH transcription factor 036
Solyc08g005930	F-box/kelch-repeat protein SKIP25 (AHRD V3.3 *** A0A2G2XM52_CAPBA)
Solyc02g063450	Glycine-rich domain-containing protein 2 (AHRD V3.3 *** A0A2G3A574_CAPAN)
Solyc08g008170	Calcium-dependent protein kinase (AHRD V3.3 *** B2KTA5_WHEAT)
Solyc04g079310	RNA-binding protein 47C (AHRD V3.3 *** A0A2U1PUZ3_ARTAN)
Solyc02g083110	DUF641 domain-containing protein (AHRD V3.3 *** A0A1Q3C2N9_CEPFO)
Solyc01g010640	NAD(P)-linked oxidoreductase superfamily protein (AHRD V3.3 *** Q949S6_ARATH)
Solyc05g008130	Unknown protein
Solyc02g077840	ERF.F12
Solyc01g007070	BEL1-like homeodomain protein 3 (AHRD V3.3 *** A0A2G3AY56_CAPCH)
Solyc09g075280	Exocyst complex component (AHRD V3.3 *** A0A2G2W0K7_CAPBA)
Solyc10g006450	COBRA-like protein 10 (AHRD V3.3 *** A0A2G3ATH9_CAPCH)
Solyc04g017710	Zinc finger transcription factor 32
Solyc01g111300	Cold-shock protein (AHRD V3.3 *-* A0A200RAC1_9MAGN)
Solyc12g088450	C5orf35 (AHRD V3.3 *** AT5G23200.1)
Solyc05g051560	Mitochondrial substrate carrier family protein (AHRD V3.11 *** tr|A0A1P8BDA7|A0A1P8BDA7_ARATH)
Solyc01g087040	Photosystem II PsbP (AHRD V3.3 *** A0A200Q959_9MAGN)
Solyc09g090760	Major facilitator superfamily protein (AHRD V3.3 *** A0A2U1PVI2_ARTAN)
Solyc07g063620	Membrane lipoprotein lipid attachment site-like protein
Solyc12g008970	O-acyltransferase (AHRD V3.3 *** A0A2G2X3X8_CAPBA)
Solyc08g078170	Ethylene-responsive transcription factor 2 (AHRD V3.3 *** A0A2G3DC56_CAPCH)
Solyc07g052680	lysine-rich arabinogalactan protein 19 (AHRD V3.3 *-* XP_010324089.1)
Solyc07g055280	WRKY transcription factor 78
Solyc07g053280	Ketol-acid reductoisomerase (AHRD V3.3 *** K4CFM5_SOLLC)
Solyc07g006030	Tetratricopeptide repeat (TPR)-like superfamily protein (AHRD V3.3 *** A0A2U1MFU8_ARTAN)
Solyc09g008140	Membrane magnesium transporter (AHRD V3.3 *** A0A1U8EHI1_CAPAN)
Solyc05g044620	Unknown protein
Solyc01g086690	Sister chromatid cohesion 1 protein 4 (AHRD V3.3 *** A0A2G3DGK5_CAPCH)
Solyc09g009440	Iron-sulfur assembly protein IscA-like 1
Solyc06g065190	TCP transcription factor 13
Solyc05g005620	RNA-binding protein 25-like (AHRD V3.3 *** A0A2K3LLK7_TRIPR)
Solyc06g084320	EID1-like F-box protein 3 (AHRD V3.3 *** A0A2G2ZF18_CAPAN)
Solyc10g051373	RNA-binding protein (AHRD V3.3 *-* O24106_NICGU)
Solyc01g109660	meloidogyne-induced giant cell protein DB275
Solyc04g008710	Arginine/serine-rich-like splicing factor (AHRD V3.3 *-* Q9SII4_ARATH)
Solyc10g051377	RNA-binding protein (AHRD V3.3 *** O24106_NICGU)
Solyc06g065100	R2R3MYB transcription factor 3
Solyc10g078530	Patatin (AHRD V3.3 *** A0A2G3BI67_CAPCH)
Solyc08g076090	DUF760 domain-containing protein (AHRD V3.3 *** A0A1Q3CP94_CEPFO)
Solyc12g098920	Guanosine-3'5'-bis(Diphosphate) 3'-pyrophosphohydrolase (AHRD V3.3 *** E5GC47_CUCME)
Solyc04g076390	Cysteine--tRNA ligase (AHRD V3.3 *** A0A1J3GNV7_NOCCA)
Solyc12g099970	SNF1 kinase complex anchoring protein
Solyc01g107170	Zinc finger protein (AHRD V3.3 *** A0T3Q5_SOLTU)
Solyc05g007730	Mitochondrial carrier protein (AHRD V3.3 *** A0A200QP40_9MAGN)
Solyc02g063510	hypothetical protein (AHRD V3.3 *-* AT5G67020.1)
Solyc01g106030	GATA transcription factor 28 (AHRD V3.3 *** A0A2G3AWS2_CAPCH)
Solyc04g082130	Pseudouridine synthase family protein (AHRD V3.11 *** tr|A0A2U1N9V5|A0A2U1N9V5_ARTAN)
Solyc08g076080	Xyloglucan endotransglucosylase/hydrolase (AHRD V3.3 *** A0A2G3DCR6_CAPCH)
Solyc04g008580	Ankyrin repeat (AHRD V3.3 *** A0A200R764_9MAGN)
Solyc08g083110	Methionine gamma-lyase (AHRD V3.3 *** A0A1U8G8Y5_CAPAN)
Solyc09g090340	Transducin/WD40 repeat-like superfamily protein (AHRD V3.3 *** AT4G14310.1)
Solyc09g091420	Inosine triphosphate pyrophosphatase (AHRD V3.3 *** A0A2G2W1Y2_CAPBA)
Solyc01g091590	BON1-associated protein 2-like (AHRD V3.11 *** tr|A0A2I4E3A5|A0A2I4E3A5_9ROSI)
Solyc03g121260	23S rRNA (Uracil-5-)-methyltransferase rumA (AHRD V3.3 *** A0A2K3PEV5_TRIPR)
Solyc10g005260	RNA-binding protein (AHRD V3.3 *** A0A2K3PBB6_TRIPR)
Solyc07g007890	CCR4-NOT transcription complex subunit 10-like (AHRD V3.3 *** A0A2I4EMI0_9ROSI)
Solyc11g065490	protein RETICULATA-RELATED 4
Solyc01g087590	Polyamine oxidase (AHRD V3.3 *** Q4H439_TOBAC)
Solyc10g150145	Late embryogenesis abundant (LEA) hydroxyproline-rich glycoprotein family (AHRD V3.11 *** tr|Q9SVC8|Q9SVC8_ARATH)
Solyc11g005750	Pectinesterase (AHRD V3.3 *** A0A2I4GT13_9ROSI)
Solyc10g078930	Activator of 90 kDa heat shock protein ATPase-like protein 1 (AHRD V3.3 *** A0A1J3GDI7_NOCCA)
Solyc00g217960	RING/U-box superfamily protein (AHRD V3.11 *-* tr|A0A2U1KCN8|A0A2U1KCN8_ARTAN)
Solyc11g071910	GTPase LSG1-2 (AHRD V3.3 *** A0A2G3BAP2_CAPCH)
Solyc01g008230	TCP transcription factor 15 (AHRD V3.11 *** tr|G3BGV5|G3BGV5_SOLLC)
Solyc04g079410	Protein OSB1
Solyc12g009160	Inter-alpha-trypsin inhibitor heavy chain-like protein (AHRD V3.3 *** Q8L798_ARATH)
Solyc02g084900	P-loop containing nucleoside triphosphate hydrolases superfamily protein (AHRD V3.3 *** A0A2U1NGS8_ARTAN)
Solyc09g011780	R2R3MYB transcription factor 1
Solyc03g119930	Molybdate transporter like (AHRD V3.3 *** A0A2R6PTH4_ACTCH)
Solyc04g079960	geranylgeranyl pyrophosphate synthase 2
Solyc05g025750	SH3 domain protein (AHRD V3.3 *** A0A2K3ME66_TRIPR)
Solyc10g079840	Peptide chain release factor 2-like protein (AHRD V3.3 *** A0A2K3N7D8_TRIPR)
Solyc04g078250	metal transporter Nramp2
Solyc01g098210	transmembrane protein adipocyte-associated 1-like (AHRD V3.3 *** A0A2I4GNC8_9ROSI)
Solyc04g064860	MADS-box transcription factor 23 (AHRD V3.3 *** A0A2G2Y5S9_CAPAN)
Solyc02g092420	Phototropic-responsive NPH3 family protein (AHRD V3.3 *-* A0A2U1NGE5_ARTAN)
Solyc03g026270	CRT binding factor 3 (AHRD V3.3 *** B3TPP7_SOLPI)
Solyc12g087950	AT-hook motif nuclear-localized protein (AHRD V3.3 *** A0A1U8GD78_CAPAN)
Solyc09g009650	Unknown protein
Solyc07g005530	Ubiquitin carboxyl-terminal hydrolase 23 (AHRD V3.3 *** A0A1U8HH33_CAPAN)
Solyc01g112290	Glutamate--tRNA ligase
Solyc12g009240	Ethylene-responsive transcription factor (AHRD V3.3 *-* A0A2G3BP26_CAPCH)
Solyc08g007990	RNA-binding protein NOB1 (AHRD V3.3 *** A0A2K3NS65_TRIPR)
Solyc03g118630	transmembrane protein (AHRD V3.3 *** AT3G17950.1)
Solyc05g010015	Nudix hydrolase 1 (AHRD V3.3 *** A0A2G3B6G9_CAPCH)
Solyc08g077790	Peptidyl-prolyl cis-trans isomerase (AHRD V3.3 *** A0A2U1QI01_ARTAN)
Solyc11g008760	Pentatricopeptide repeat-containing protein (AHRD V3.3 *** A0A2G2VE96_CAPBA)
Solyc02g069120	zinc finger protein ZPR1-like (AHRD V3.3 *** A0A2I4F7X7_9ROSI)
Solyc06g068960	Calcium-binding allergen Ole e 8 (AHRD V3.3 *** A0A2G2WLM3_CAPBA)
Solyc01g091690	S-adenosyl-L-methionine-dependent methyltransferases superfamily protein (AHRD V3.3 *** A0A2U1NM08_ARTAN)
Solyc04g080390	plasma membrane fusion protein Chr5
Solyc03g121620	Late embryogenesis abundant (LEA) hydroxyproline-rich glycoprotein family (AHRD V3.3 *** A0A2U1MMJ0_ARTAN)
Solyc07g062700	Calcium-binding EF-hand family protein (AHRD V3.3 *** A0A2U1MZJ3_ARTAN)
Solyc01g098040	S-adenosyl-L-methionine-dependent methyltransferases superfamily protein (AHRD V3.3 *** Q9MAA9_ARATH)
Solyc11g008360	Pseudouridine synthase family protein (AHRD V3.3 *** A0A1P8AXV3_ARATH)
Solyc05g009420	transmembrane protein (AHRD V3.3 *-* AT1G25400.2)
Solyc01g106430	Inorganic pyrophosphatase (AHRD V3.3 *** A0A2G2W8Z5_CAPBA)
Solyc10g018900	Unknown protein
Solyc11g069000	T-complex protein 1 subunit beta (AHRD V3.3 *** A0A2G2YHG6_CAPAN)
Solyc11g069780	P-loop NTPase domain-containing protein LPA1-like protein 1 (AHRD V3.3 *** A0A2G3BBZ6_CAPCH)
Solyc12g007070	Heat shock transcription factor (AHRD V3.3 *-* A0A1Y1I763_KLENI)
Solyc10g081700	hypothetical protein (AHRD V3.3 *-* AT2G27180.1)
Solyc05g052050	DNA-binding protein Pti4
Solyc01g065510	leucine-rich repeat extensin-like protein 6 (AHRD V3.3 *-* XP_010321602.1)
Solyc02g082540	Calcium-binding EF hand family protein (AHRD V3.3 *** A0A1P8AQ08_ARATH)
Solyc11g020670	TCP transcription factor 12
Solyc05g054740	Sulfate transporter (AHRD V3.3 *** Q93YK5_BRANA)
Solyc04g080680	P-loop containing nucleoside triphosphate hydrolases superfamily protein (AHRD V3.11 *** tr|A0A2U1NGY3|A0A2U1NGY3_ARTAN)
Solyc08g076480	Plastid lipid-associated protein chloroplastic-like (AHRD V3.3 *** A0A2K3PR63_TRIPR)
Solyc11g068900	Late embryogenesis abundant hydroxyproline-rich glycoprotein (AHRD V3.3 *-* A0A2K3L117_TRIPR)
Solyc03g093610	ethylene response factor A.2
Solyc03g007230	Protein phosphatase 2C (AHRD V3.3 *** A0A2U1KYU0_ARTAN)
Solyc03g033500	Cold-shock protein (AHRD V3.3 *-* A0A200RAC1_9MAGN)
Solyc06g073550	La-related protein 1 (AHRD V3.3 *** A0A2G3CAE9_CAPCH)
Solyc08g082750	Plant regulator RWP-RK family protein (AHRD V3.3 *** G7IAL8_MEDTR)
Solyc03g120140	DUF632 domain-containing protein/DUF630 domain-containing protein (AHRD V3.3 *-* A0A1Q3CDM4_CEPFO)
Solyc03g115980	Geranylgeranyl diphosphate reductase
Solyc08g061610	Copper-transporting ATPase PAA2
Solyc02g089060	Methyl esterase 11 (AHRD V3.3 *** A0A2U1LRP6_ARTAN)
Solyc11g013190	Oxysterol-binding protein (AHRD V3.3 *** A0A200QNE7_9MAGN)
Solyc01g088440	RING/U-box superfamily protein (AHRD V3.3 *-* A0A2U1LDD8_ARTAN)
Solyc04g082750	3-beta hydroxysteroid dehydrogenase/isomerase (AHRD V3.3 *** A0A200PR22_9MAGN)
Solyc04g079860	Hexosyltransferase (AHRD V3.3 *** A0A2G2ZRY0_CAPAN)
Solyc08g062960	Heat shock transcription factor (AHRD V3.11 *-* tr|A0A1Y1I763|A0A1Y1I763_KLENI)
Solyc08g067420	DNAse I-like superfamily protein (AHRD V3.3 *-* A0A178UDZ2_ARATH)
Solyc06g063110	RING/U-box superfamily protein (AHRD V3.3 *** A0A2U1LDD8_ARTAN)
Solyc03g118240	Magnesium-protoporphyrin IX methyltransferase (AHRD V3.11 *** tr|A0A1P8B4G1|A0A1P8B4G1_ARATH)
Solyc04g072520	Mitochondrial transcription termination factor family protein (AHRD V3.3 *** Q9SD94_ARATH)
Solyc07g051880	MAP kinase kinase kinase 52
Solyc08g005570	Root UVB sensitive family (AHRD V3.11 *** tr|A0A2U1QLM3|A0A2U1QLM3_ARTAN)
Solyc05g008830	Octicosapeptide/Phox/Bem1p family protein (AHRD V3.3 *-* A0A2K3L5A6_TRIPR)
Solyc02g067690	Glycosyltransferase (AHRD V3.3 *** A0A2U1M9M1_ARTAN)
Solyc03g031720	RNA-binding protein (AHRD V3.3 *** A0A2K3PBB6_TRIPR)
Solyc01g098560	Sugar facilitator protein 8
Solyc06g071530	60S ribosomal protein L44 (AHRD V3.11 *** tr|A0A2G3CYG5|A0A2G3CYG5_CAPCH)
Solyc11g006470	Core-2 i-branching beta-n-acetylglucosaminyltransferase family protein (AHRD V3.3 *** A0A2K3MQ33_TRIPR)
Solyc10g079890	Calcium-binding EF-hand family protein (AHRD V3.3 *** A0A2U1NS17_ARTAN)
Solyc10g008660	HXXXD-type acyl-transferase family protein (AHRD V3.11 *** tr|A0A2U1NMZ6|A0A2U1NMZ6_ARTAN)
Solyc05g053290	Protein phosphatase-2C (AHRD V3.3 *** O82469_MESCR)
Solyc07g007150	hypothetical protein (AHRD V3.3 -** AT5G35090.1)
Solyc08g065990	Cytosolic Fe-S cluster assembly factor narfl (AHRD V3.3 *** A0A2S1CF11_PRUYE)
Solyc02g067320	Zinc-finger homeodomain protein 10 (AHRD V3.3 *** A0A2G3D3J7_CAPCH)
Solyc02g089620	proline dehydrogenase
Solyc08g079750	1-aminocyclopropane-1-carboxylate synthase (AHRD V3.3 *** Q6U5H3_ROSHC)
Solyc05g052590	Pkinase domain-containing protein (AHRD V3.3 *** A0A1Q3DF19_CEPFO)
Solyc01g109200	RING/U-box superfamily protein (AHRD V3.3 *-* A0A2U1Q188_ARTAN)
Solyc06g051750	Cytochrome P450 (AHRD V3.3 *** A0A200PWT8_9MAGN)
Solyc08g078990	Phosphatidic acid phosphatase type 2/haloperoxidase (AHRD V3.3 *** A0A200PS40_9MAGN)
Solyc06g050250	Adenine/guanine permease AZG1 (AHRD V3.3 *** A0A2G2WI90_CAPBA)
Solyc01g107900	O-acyltransferase WSD1-like protein (AHRD V3.3 *** A0A2K3ND41_TRIPR)
Solyc06g076360	Protein TOC75
Solyc11g042620	Nuclear transport factor 2 (NTF2)-like protein (AHRD V3.3 *-* Q67TV5_ORYSJ)
Solyc04g076820	Phox/Bem1p (AHRD V3.3 *** A0A200QI01_9MAGN)
Solyc03g097290	DB199
Solyc02g090180	Oligopeptidase B (AHRD V3.3 *** A0A2I0V9Y9_9ASPA)
Solyc03g119600	NIMIN2b protein (AHRD V3.3 *** Q0MR95_TOBAC)
Solyc09g009820	Thioredoxin family protein (AHRD V3.11 *** tr|Q940I2|Q940I2_ARATH)
Solyc12g096070	Growth-regulating factor 4 (AHRD V3.3 *** A0A2G3BQA5_CAPCH)
Solyc09g014280	HXXXD-type acyl-transferase family protein (AHRD V3.3 *** V5PZN5_9CARY)
Solyc11g007540	Cytochrome P450 (AHRD V3.3 *** A0A346CEB0_TANCI)
Solyc01g058670	Transcription factor (AHRD V3.3 *** A0A2G3DG53_CAPCH)
Solyc08g078220	PPPDE putative thiol peptidase family protein (AHRD V3.3 *** A0A2U1KMT1_ARTAN)
Solyc12g088360	RING-type E3 ubiquitin transferase (AHRD V3.3 *-* A0A2I4H694_9ROSI)
Solyc03g124110	Dehydration-responsive element-binding transcription factor (AHRD V3.3 *** A0A1S6M2D0_9CARY)
Solyc02g069270	Argonaute 2b
Solyc01g079640	pollen-specific LRR extensin-like protein Chr2
Solyc04g016160	F-box/LRR-repeat protein At5g63520-like (AHRD V3.3 *** A0A2I4FAV8_9ROSI)
Solyc08g078460	Oxidoreductase family protein (AHRD V3.3 *** A0A2U1N6F1_ARTAN)
Solyc07g006810	Adenosylmethionine-8-amino-7-oxononanoate aminotransferase (AHRD V3.3 *** S8C9K2_9LAMI)
Solyc12g044850	WAS/WASL-interacting family protein (AHRD V3.3 *** AT1G55160.1)
Solyc01g097970	Deoxyuridine 5'-triphosphate nucleotidohydrolase (AHRD V3.11 *** tr|A0A2G2W7R1|A0A2G2W7R1_CAPBA)
Solyc01g107800	glucuronoxylan 4-O-methyltransferase 1-like (AHRD V3.3 *** A0A2I4H011_9ROSI)
Solyc09g065860	Phosphoribulokinase/uridine kinase (AHRD V3.3 *** A0A200Q4F8_9MAGN)
Solyc11g008990	Phage shock protein A
Solyc10g039360	DUF1639 domain-containing protein (AHRD V3.3 *-* A0A1Q3BZV8_CEPFO)
Solyc12g056800	Oxidoreductase (AHRD V3.3 *** A0A200QCB4_9MAGN)
Solyc10g005960	Fasciclin-like arabinogalactan protein (AHRD V3.3 *** A0A2R6P548_ACTCH)
Solyc02g083610	Ras domain-containing protein/DUF632 domain-containing protein/DUF630 domain-containing protein (AHRD V3.11 *** tr|A0A1Q3BAN2|A0A1Q3BAN2_CEPFO)
Solyc03g007590	Pentatricopeptide repeat (PPR) superfamily protein (AHRD V3.3 *** A0A2U1LU47_ARTAN)
Solyc04g074830	ENTH/ANTH/VHS superfamily protein (AHRD V3.3 *** A0A2U1QGP5_ARTAN)
Solyc10g012060	Mechanosensitive ion channel protein 1
Solyc11g065750	Armadillo repeat-containing protein 8-like (AHRD V3.3 *** A0A2K3NUY2_TRIPR)
Solyc11g069940	Glutaredoxin (AHRD V3.3 *** A0A118JSL8_CYNCS)
Solyc01g111670	transmembrane protein%2C putative (DUF1279) (AHRD V3.3 *** AT2G20940.2)
Solyc05g050970	Transketolase (AHRD V3.11 *** tr|A0A200R9X0|A0A200R9X0_9MAGN)
Solyc04g075000	Serine/threonine-protein kinase-like protein (AHRD V3.3 *** A0A2G3CNY7_CAPCH)
Solyc05g006510	Hexosyltransferase (AHRD V3.11 *** tr|A0A2G3B8F1|A0A2G3B8F1_CAPCH)
Solyc09g011250	Mitochondrial glycoprotein (AHRD V3.3 *** A0A200QYU1_9MAGN)
Solyc01g095180	RING/U-box superfamily protein (AHRD V3.3 *-* A0A178VRD3_ARATH)
Solyc01g009780	GSH-induced LITAF domain protein (AHRD V3.3 *** GILP_ARATH)
Solyc07g065970	Chaperone protein DnaJ (AHRD V3.3 *** A0A2G3C2H4_CAPCH)
Solyc03g115900	Chlorophyll a-b binding protein
Solyc06g009490	Pentatricopeptide repeat (AHRD V3.3 *-* A0A200QRY0_9MAGN)
Solyc07g008860	WD40 repeat (AHRD V3.3 *** A0A200PQC1_9MAGN)
Solyc08g067040	Transducin/WD40 repeat-like superfamily protein (AHRD V3.3 *** A0A1P8BCJ2_ARATH)
Solyc03g026280	C-repeat binding factor 1
Solyc04g056390	Isopentenyl-diphosphate Delta-isomerase (AHRD V3.3 *** A0A2L0V4K4_9APIA)
Solyc01g095360	Calcium-dependent lipid-binding (CaLB domain) family protein (AHRD V3.3 *-* Q9M148_ARATH)
Solyc05g015420	F-box protein (AHRD V3.11 *** tr|A0A2G2YF26|A0A2G2YF26_CAPAN)
Solyc10g081260	Protein DETOXIFICATION (AHRD V3.3 *** A0A2G3BHA5_CAPCH)
Solyc11g072620	Unknown protein
Solyc03g112580	Receptor protein kinase
Solyc01g006970	RNA helicase family protein (AHRD V3.3 *** A0A2U1PBZ9_ARTAN)
Solyc04g074520	VQ motif-containing protein 9 (AHRD V3.3 *** A0A2I4DH74_9ROSI)
Solyc06g071230	Transcription factor MYB1R1 (AHRD V3.3 *** MY1R1_SOLTU)
Solyc11g016990	Protein-tyrosine-phosphatase PTP1 (AHRD V3.3 *** A0A2G3CM37_CAPCH)
Solyc11g064890	hypoxia-induced protein L31
Solyc02g088760	50S ribosomal protein L7/L12 (AHRD V3.3 *** A0A1U8GY39_CAPAN)
Solyc08g080370	Acetylornithine aminotransferase
Solyc01g105340	Chaperone protein DnaJ (AHRD V3.3 *** A0A2G2VAL8_CAPBA)
Solyc04g082090	Alpha-amylase (AHRD V3.3 *** K4BVT6_SOLLC)
Solyc11g033270	MAP kinase kinase kinase 82
Solyc12g007090	thermosome subunit gamma (AHRD V3.3 *** AT5G19540.2)
Solyc07g055200	SlSK
Solyc09g075320	RING-H2 finger protein ATL5-like (AHRD V3.3 *** A0A2I4EZH4_9ROSI)
Solyc01g058720	Calcium-binding EF-hand (AHRD V3.3 *** A0A2U1NQC6_ARTAN)
Solyc01g087020	Unknown protein
Solyc07g065190	Heavy metal-associated isoprenylated plant protein (AHRD V3.3 *-* A0A2R6RV38_ACTCH)
Solyc06g051520	CTD small phosphatase-like protein (AHRD V3.3 *** A0A1J3JJA1_NOCCA)
Solyc06g008030	bHLH transcription factor 041
Solyc04g008860	Protein arginine N-methyltransferase (AHRD V3.11 *** tr|A0A2U1N672|A0A2U1N672_ARTAN)
Solyc03g005580	Seed storage protein (AHRD V3.3 *** Q2TPW5_9ROSI)
Solyc04g076270	DnaJ domain-containing protein (AHRD V3.3 *** A0A1Q3BFQ6_CEPFO)
Solyc10g084640	N-acetyltransferase (AHRD V3.3 *** B6T916_MAIZE)
Solyc01g097810	zeta-carotene desaturase
Solyc04g078850	defective chloroplasts and leaves
Solyc05g009850	GC-rich sequence DNA-binding factor (AHRD V3.3 *** A0A200R9S4_9MAGN)
Solyc05g054490	3-oxo-5-alpha-steroid 4-dehydrogenase (AHRD V3.3 *** A0A200R6L0_9MAGN)
Solyc11g010240	protein SCAI (AHRD V3.3 *** A0A2I4GV29_9ROSI)
Solyc03g122030	Trihelix transcription factor ASIL2 (AHRD V3.3 *-* ASIL2_ARATH)
Solyc08g080540	Heat stress transcription factor B-2b (AHRD V3.3 *** A0A2G3DB98_CAPCH)
Solyc07g063270	Nucleolar GTP-binding protein 2 (AHRD V3.3 *** A0A0H5RA30_9EUKA)
Solyc04g071160	Basic-leucine zipper (BZIP) transcription factor family protein (AHRD V3.3 *-* Q8H1F0_ARATH)
Solyc05g052190	Transcription elongation factor TFIIS (AHRD V3.3 *** A0A2G2ZJJ8_CAPAN)
Solyc08g075300	Protein decapping 5 (AHRD V3.3 *-* A0A2G3B6L4_CAPCH)
Solyc11g066740	protein RETICULATA
Solyc05g018600	Actin-related protein 6 (AHRD V3.3 *** A0A1U8GPF8_CAPAN)
Solyc12g007120	Signal peptidase I (AHRD V3.3 *** B2J5A2_NOSP7)
Solyc06g074400	Proteinaceous RNase P 2 (AHRD V3.3 *** A0A1U8H3H4_CAPAN)
Solyc03g117930	FRIGIDA-like protein (AHRD V3.11 *** tr|A0A2G3A2S4|A0A2G3A2S4_CAPAN)
Solyc04g076320	Argininosuccinate lyase (AHRD V3.11 *** tr|A0A2G3CP16|A0A2G3CP16_CAPCH)
Solyc05g054180	OBERON-like protein (AHRD V3.3 *** PVIP_NICBE)
Solyc10g085970	Protein MODIFIER OF SNC1 11 (AHRD V3.3 *** A0A2G2YLK2_CAPAN)
Solyc02g078280	DNA ligase-like protein (AHRD V3.3 *** AT2G33793.2)
Solyc01g095570	Mitochondrial carrier protein (AHRD V3.3 *** A0A200PUN8_9MAGN)
Solyc06g060830	Homeobox-leucine zipper protein HAT2 (AHRD V3.3 *** A0A2G2WJU4_CAPBA)
Solyc04g016490	Purple acid phosphatase 16 (AHRD V3.3 *** A0A2U1NPL5_ARTAN)
Solyc11g066100	Heat shock protein 70 (AHRD V3.3 *** S8C6K2_9LAMI)
Solyc11g071920	Serine/threonine-protein phosphatase (AHRD V3.3 *** A0A2G2VPQ2_CAPBA)
Solyc02g087190	Peroxidase (AHRD V3.3 *** K4BBM6_SOLLC)
Solyc03g120080	periodic tryptophan protein 2 homolog (AHRD V3.3 *** A0A2I4EVX9_9ROSI)
Solyc04g072900	dehydration-responsive element binding protein 3
Solyc12g098520	Heat stress transcription factor A-5 (AHRD V3.3 *** A0A2G3AV96_CAPCH)
Solyc02g069170	Transcription initiation factor TFIID subunit 8 (AHRD V3.3 *** A0A1J3F703_NOCCA)
Solyc01g104880	Phosphatidylserine decarboxylase proenzyme 2 (AHRD V3.3 *** A0A2G3AWK6_CAPCH)
Solyc03g119010	Pre-mRNA-splicing factor SPF27-like protein (AHRD V3.11 *** tr|A0A2G3CZW4|A0A2G3CZW4_CAPCH)
Solyc03g121890	Hydroxyproline-rich glycoprotein family protein (AHRD V3.3 *-* Q9CAJ1_ARATH)
Solyc04g056320	Zinc finger
Solyc08g080530	C2 calcium-dependent membrane targeting (AHRD V3.3 *** A0A2U1N7N9_ARTAN)
Solyc02g089320	Alpha/beta-Hydrolases superfamily protein (AHRD V3.3 *** F4J5H1_ARATH)
Solyc05g056350	cleft lip and palate transmembrane protein 1 homolog (AHRD V3.3 *** A0A2I4DPR5_9ROSI)
Solyc01g087580	hypothetical protein Chr3
Solyc04g008450	Potassium transporter (AHRD V3.3 *** A0A2G3CF51_CAPCH)
Solyc09g066100	Histone H1 (AHRD V3.3 *-* A0A2G2WIH1_CAPBA)
Solyc09g061840	3-ketoacyl-CoA thiolase peroxisomal-like (AHRD V3.11 *** tr|A0A2K3P5R8|A0A2K3P5R8_TRIPR)
Solyc11g008250	P-loop containing nucleoside triphosphate hydrolases superfamily protein (AHRD V3.3 *** A0A2U1LNZ5_ARTAN)
Solyc03g113460	Short-chain dehydrogenase reductase 4 (AHRD V3.3 *** A0A2G2WRF5_CAPBA)
Solyc02g082130	Surfeit locus protein 6 (AHRD V3.3 *** A0A2U1QM59_ARTAN)
Solyc08g083140	Alpha/beta-Hydrolases superfamily protein (AHRD V3.11 *** tr|A0A1Y1I3I6|A0A1Y1I3I6_KLENI)
Solyc01g112150	SEC1 family transport protein SLY1 (AHRD V3.3 *** A0A2G2W9B3_CAPBA)
Solyc03g121380	Mitochondrial outer membrane import complex protein METAXIN (AHRD V3.3 *-* A0A2G2V8U8_CAPBA)
Solyc06g005680	Two-component response regulator (AHRD V3.3 *-* C0HE02_MAIZE)
Solyc06g036260	beta-carotene hydroxylase-1
Solyc07g055100	Trihelix transcription factor ASIL1 (AHRD V3.3 *** A0A2G2WEG4_CAPBA)
Solyc02g079390	Protein PLANT CADMIUM RESISTANCE like (AHRD V3.3 *** A0A2R6QA13_ACTCH)
Solyc06g066540	Ethylene-responsive transcription factor (AHRD V3.3 *-* A0A2G2XMU8_CAPBA)
Solyc08g068200	GTP-binding protein (AHRD V3.11 *** tr|A0A2G2YY28|A0A2G2YY28_CAPAN)
Solyc02g089880	Hexosyltransferase (AHRD V3.3 *** A0A1U8G2N1_CAPAN)
Solyc01g010440	Glycine-rich protein (AHRD V3.11 *** tr|Q9LFX8|Q9LFX8_ARATH)
Solyc11g072640	Zinc-binding dehydrogenase (AHRD V3.3 *** A0A162PTR1_9PEZI)
Solyc10g081750	Mal d 1-associated protein (AHRD V3.3 *** AT2G35900.1)
Solyc02g160280	U-box domain-containing protein 4-like (AHRD V3.11 *** tr|A0A2I4HV32|A0A2I4HV32_9ROSI)
Solyc12g010900	F-box protein MAX2 (AHRD V3.3 *** A0A2G2X2R2_CAPBA)
Solyc01g073900	E3 ubiquitin-protein ligase (AHRD V3.3 *-* A0A2G3D341_CAPCH)
Solyc01g108910	maternal effect embryo arrest 14 Chr2
Solyc02g020940	Glyceraldehyde-3-phosphate dehydrogenase (AHRD V3.3 *** A0A2G3D2C2_CAPCH)
Solyc05g052170	Acyl-CoA N-acyltransferases (NAT) superfamily protein Chr4
Solyc06g066440	hexokinase 2
Solyc08g076190	protein dimerization (AHRD V3.3 *-* AT5G45610.1)
Solyc08g007230	Ethylene-responsive transcription factor 2 (AHRD V3.3 *** A0A2G3DC56_CAPCH)
Solyc09g090730	AMT1
Solyc06g071820	BTB/POZ and TAZ domain-containing protein 1 (AHRD V3.3 *** A0A2G3BFP5_CAPCH)
Solyc04g077950	nucleic acid binding protein (AHRD V3.3 *-* AT1G27750.1)
Solyc05g056140	Zinc finger (C3HC4-type RING finger) family protein (AHRD V3.3 *** A0A2U1N0U6_ARTAN)
Solyc01g102410	Glutamine--tRNA ligase (AHRD V3.3 *** A0A2I0WQV3_9ASPA)
Solyc12g005960	Ethylene-responsive transcription factor 3 (AHRD V3.3 *-* A0A2U1KRH6_ARTAN)
Solyc10g083630	DNA demethylase 2
Solyc08g078190	Ethylene-responsive transcription factor 5 (AHRD V3.11 *** tr|A0A2G2XL45|A0A2G2XL45_CAPBA)
Solyc05g008105	hydroxyproline-rich glycoprotein family protein (AHRD V3.3 --* AT1G23040.3)
Solyc08g078310	Chromogranin (DUF1639) (AHRD V3.3 *-* O23587_ARATH)
Solyc01g080500	Plant/F10N7-170 protein
Solyc04g009950	cell division cycle 5
Solyc10g085220	Heparanase-like protein 3 (AHRD V3.3 *** A0A1U8EH62_CAPAN)
Solyc01g080340	BSD domain-containing protein (AHRD V3.11 *** tr|A0A1Q3B6E5|A0A1Q3B6E5_CEPFO)
Solyc01g079090	Protoporphyrinogen oxidase (AHRD V3.3 *** O64384_SOLTU)
Solyc06g084120	Jasmonate ZIM domain protein k.1 (AHRD V3.3 *** I3WTA8_NICAT)
Solyc09g075830	Protein TIME FOR COFFEE (AHRD V3.3 *-* A0A2K3NUY4_TRIPR)
Solyc11g066620	aspartic proteinase-like protein 2 (AHRD V3.3 *** A0A1U7W5P3_NICSY)
Solyc03g113330	Nodulin-like / Major Facilitator Superfamily protein (AHRD V3.3 *** A0A2U1M3G7_ARTAN)
Solyc07g063170	Unknown protein
Solyc02g092430	60S ribosomal protein L26 (AHRD V3.3 *** A0A1U8FHZ3_CAPAN)
Solyc03g025380	Peroxidase (AHRD V3.3 *** K4BF11_SOLLC)
Solyc06g068490	Magnesium transporter MRS2-B (AHRD V3.3 *** A0A2G2WL88_CAPBA)
Solyc07g055870	MAP kinase kinase kinase 58
Solyc09g018370	ARM repeat superfamily protein (AHRD V3.3 *** AT5G27970.1)
Solyc11g009080	DAHP synthase 1 precursor
Solyc02g083835	Chaperone protein DnaJ (AHRD V3.3 *** A0A2G2XG76_CAPBA)
Solyc09g005580	SelT-like protein (AHRD V3.11 *-* tr|A0A2G3BKB5|A0A2G3BKB5_CAPCH)
Solyc09g090960	RNA-binding (RRM/RBD/RNP motifs) family protein (AHRD V3.3 *** A0A2U1N2D5_ARTAN)
Solyc05g005800	Threonine--tRNA ligase
Solyc04g012060	Ribonucleoside-diphosphate reductase (AHRD V3.3 *** A0A1U8FDK5_CAPAN)
Solyc06g068230	Tetratricopeptide repeat (TPR)-like superfamily protein (AHRD V3.3 *** A0A2U1MYN5_ARTAN)
Solyc03g032060	RING/U-box superfamily protein (AHRD V3.3 *** A0A2U1LI04_ARTAN)
Solyc07g006070	GDP-L-fucose synthase (AHRD V3.3 *** A0A1Y1HPT7_KLENI)
Solyc04g007580	DUF4228 domain-containing protein (AHRD V3.3 *** A0A1Q3CT45_CEPFO)
Solyc08g074410	Tryptophan--tRNA ligase
Solyc11g068770	Polynucleotidyl transferase
Solyc12g008350	dehydration responsive element binding protein 2
Solyc04g014730	Fumarylacetoacetase (AHRD V3.3 *** A0A1U8GL68_CAPAN)
Solyc05g007580	Zinc-finger homeodomain protein 11 (AHRD V3.3 *** A0A2G2VLP7_CAPBA)
Solyc11g006190	AT-hook motif nuclear-localized protein 1 (AHRD V3.3 *** A0A2G2Y739_CAPAN)
Solyc03g095850	Peptide-N4-(N-acetyl-beta-glucosaminyl)asparagine amidase A (AHRD V3.3 *** A0A200PX65_9MAGN)
Solyc03g116660	transmembrane protein (AHRD V3.3 --* AT3G15780.1)
Solyc11g062440	L-ascorbate oxidase (AHRD V3.3 *** ASO_TOBAC)
Solyc02g078610	Splicing factor 3B subunit 2 (AHRD V3.3 *** A0A2G2XEY6_CAPBA)
Solyc06g071070	NAD(P)-binding Rossmann-fold superfamily protein (AHRD V3.3 *** A0A2U1L921_ARTAN)
Solyc06g076700	UPF0503 protein
Solyc01g007750	Mitochondrial transcription termination factor family protein (AHRD V3.3 *** O64685_ARATH)
Solyc02g080610	Ankyrin repeat (AHRD V3.11 *** tr|A0A200PYZ7|A0A200PYZ7_9MAGN)
Solyc02g082330	Unknown protein
Solyc11g066320	Exostosin family protein (AHRD V3.3 *** A0A2U1P7C1_ARTAN)
Solyc09g008470	Splicing factor 3A subunit 2 (AHRD V3.11 *** tr|A0A2G2VXV2|A0A2G2VXV2_CAPBA)
Solyc04g054310	Alanine-glyoxylate aminotransferase 2 (AHRD V3.3 *** A0A2U1PRH4_ARTAN)
Solyc02g086360	Octicosapeptide/Phox/Bem1p family protein (AHRD V3.3 *-* A0A2K3L5A6_TRIPR)
Solyc08g076870	DUF740 domain-containing protein (AHRD V3.3 *** A0A1Q3BKH7_CEPFO)
Solyc04g015450	extensin X55684
Solyc07g062440	hypothetical protein (AHRD V3.3 *** AT3G14900.1)
Solyc10g085820	dnaJ homolog subfamily C member 28 (AHRD V3.3 *** A0A2I4E0W0_9ROSI)
Solyc06g008210	Protein BREAST CANCER SUSCEPTIBILITY 1-like protein (AHRD V3.11 *** tr|A0A1J3HZN2|A0A1J3HZN2_NOCCA)
Solyc02g083900	Transformation/transcription domain associated protein (AHRD V3.3 *** A0A2K3NKS8_TRIPR)
Solyc03g093380	Protein kinase family protein (AHRD V3.3 *** A0A1P8AW67_ARATH)
Solyc03g112300	Octicosapeptide/phox/Bem1p domain kinase superfamily protein (AHRD V3.3 *-* A0A2K3MP92_TRIPR)
Solyc07g049560	Protein-tyrosine phosphatase (AHRD V3.11 *** tr|A0A200RBI0|A0A200RBI0_9MAGN)
Solyc04g081440	beta-fructofuranosidase
Solyc01g096230	P-loop containing nucleoside triphosphate hydrolases superfamily protein (AHRD V3.3 *** A0A2U1NSJ9_ARTAN)
Solyc04g078590	Leucine-rich repeat protein kinase family protein (AHRD V3.3 *** Q9FMI2_ARATH)
Solyc07g042160	Pectin lyase-like superfamily protein (AHRD V3.3 *** A0A2U1LH94_ARTAN)
Solyc12g096500	Zinc finger protein CONSTANS-LIKE 4 (AHRD V3.3 *** A0A2G2VJD2_CAPBA)
Solyc10g083650	Peroxiredoxin-2E
Solyc11g068460	Calcium-binding EF-hand family protein (AHRD V3.3 *** A0A2U1NS17_ARTAN)
Solyc08g078370	Ribokinase
Solyc01g007100	Digalactosyldiacylglycerol synthase 1
Solyc04g076450	LRR receptor-like serine/threonine-protein kinase GSO1 (AHRD V3.3 *** A0A1U8F0D9_CAPAN)
Solyc09g009990	GATA zinc finger protein Chr3
Solyc02g083930	BnaCnng52580D protein (AHRD V3.3 *-* A0A078JGY5_BRANA)
Solyc08g077450	electron carrier/iron ion-binding protein (AHRD V3.3 *** AT1G32730.1)
Solyc05g014400	RecQ-mediated genome instability protein 1 (AHRD V3.3 *** A0A2G3BMT0_CAPCH)
Solyc07g045170	hypothetical protein (AHRD V3.3 *-* AT2G04235.2)
Solyc08g082200	DNA primase (AHRD V3.3 *** A0A2G3ADK9_CAPAN)
Solyc01g087500	DNA topoisomerase 2 (AHRD V3.3 *** A0A2G2XSS9_CAPBA)
Solyc03g123910	Kelch repeat-containing protein (AHRD V3.3 *** A0A2G3D189_CAPCH)
Solyc11g066130	osmotin
Solyc01g109460	Polyol monosaccharide transporter 4
Solyc03g110910	Elongator complex protein 3 (AHRD V3.11 *** tr|K4BJV4|K4BJV4_SOLLC)
Solyc01g096760	pre-rRNA-processing protein TSR2-like (AHRD V3.3 *** A0A2I4GN69_9ROSI)
Solyc02g085340	Transcription factor GRAS (AHRD V3.3 *** A0A200Q206_9MAGN)
Solyc07g053735	Unknown protein
Solyc10g006140	Acid phosphatase/vanadium-dependent haloperoxidase-related protein (AHRD V3.3 *** Q8L7M6_ARATH)
Solyc11g012720	Trihelix transcription factor (AHRD V3.3 *-* B0EW03_SOYBN)
Solyc04g008020	RING/U-box superfamily protein (AHRD V3.3 *** Q93YQ5_ARATH)
Solyc01g103970	E3 ubiquitin-protein ligase RNF170-like protein (DUF 1232) (AHRD V3.3 *** Q0WWX8_ARATH)
Solyc03g114130	NHL domain protein (AHRD V3.3 *** AT5G14895.1)
Solyc07g053550	Glutaredoxin-C9 (AHRD V3.3 *** A0A2G2WE57_CAPBA)
Solyc08g082470	Late embryogenesis abundant (LEA) hydroxyproline-rich glycoprotein family (AHRD V3.3 *** Q9T0A8_ARATH)
Solyc12g017460	GDSL esterase/lipase At5g03980-like (AHRD V3.3 *** A0A1S3YRJ5_TOBAC)
Solyc06g066300	2-(3-amino-3-carboxypropyl)histidine synthase subunit 1 (AHRD V3.3 *** A0A2G3C7T2_CAPCH)
Solyc09g061710	Alba DNA/RNA-binding protein (AHRD V3.3 *-* A0A1I9LSC0_ARATH)
Solyc01g079450	Peptidase S9 (AHRD V3.3 *** A0A200R223_9MAGN)
Solyc04g072910	Endoplasmic reticulum-Golgi intermediate compartment protein 3 (AHRD V3.3 *** A0A2G3CNL7_CAPCH)
Solyc08g079550	hypothetical protein (AHRD V3.3 *** AT1G12380.1)
Solyc03g118390	Coiled-coil domain-containing protein SCD2 (AHRD V3.3 *** A0A2G3CZS6_CAPCH)
Solyc04g082030	ornithine decarboxylase
Solyc08g079630	AT-hook motif nuclear-localized protein 1 (AHRD V3.3 *** A0A2G3AEB8_CAPAN)
Solyc11g016930	Leucine-rich repeat protein kinase family protein (AHRD V3.3 *-* A0A061EED9_THECC)
Solyc04g007250	transmembrane protein (AHRD V3.3 *** AT1G25400.2)
Solyc01g094940	Protein kinase superfamily protein (AHRD V3.3 *** A0A2U1NZX1_ARTAN)
Solyc03g123750	Alpha/beta-Hydrolases superfamily protein (AHRD V3.3 *** F4JFU8_ARATH)
Solyc04g071030	RING-type E3 ubiquitin transferase (AHRD V3.3 *** A0A2G2WYL4_CAPBA)
Solyc07g052350	Aconitate hydratase (AHRD V3.3 *** A0A200Q7Z0_9MAGN)
Solyc10g079420	Calcium-dependent protein kinase (AHRD V3.3 *-* CDPK_DAUCA)
Solyc04g080640	tRNA-methyltransferase non-catalytic subunit trm6MTase subunit (AHRD V3.3 *** AT5G66440.1)
Solyc11g072080	F-box/kelch-repeat protein (AHRD V3.3 *-* A0A2G3BAF6_CAPCH)
Solyc05g013160	ribulose-1
Solyc12g056830	ATP synthase subunit delta
Solyc03g007890	class 2 small heat shock protein Le-HSP17.6
Solyc06g075610	Exocyst subunit Exo70 family protein (AHRD V3.3 *** A0A2G2WNK6_CAPBA)
Solyc08g076590	Heat shock factor protein HSF8 (AHRD V3.3 *** A0A2G2V6B5_CAPBA)
Solyc04g079830	Homeobox protein BEL1-like protein (AHRD V3.11 *** tr|A0A2G2X0S6|A0A2G2X0S6_CAPBA)
Solyc04g077220	Homeobox-leucine zipper protein HAT22 (AHRD V3.3 *** A0A2G3CPE7_CAPCH)
Solyc01g009610	Protein phosphatase inhibitor 2-like (AHRD V3.3 *** A0A2K3NNM1_TRIPR)
Solyc04g077310	G-type lectin S-receptor-like serine/threonine-protein kinase (AHRD V3.11 *-* tr|A0A2G3BAY7|A0A2G3BAY7_CAPCH)
Solyc10g160390	Cell differentiation protein RCD1-like protein (AHRD V3.11 *** tr|A0A2G3CUT5|A0A2G3CUT5_CAPCH)
Solyc02g092260	Amino-acid acetyltransferase-like protein (AHRD V3.3 *** A0A2K3MR62_TRIPR)
Solyc09g007700	RING/U-box superfamily protein (AHRD V3.3 *** A0A2U1PM96_ARTAN)
Solyc11g069460	Double-stranded RNA-binding protein 2 (AHRD V3.3 *** A0A2G2VQC6_CAPBA)
Solyc08g079700	Zinc finger A20 and AN1 domain stress-associated protein (AHRD V3.3 *** A0A2K3LX56_TRIPR)
Solyc09g083060	RING-type E3 ubiquitin transferase (AHRD V3.3 *-* A0A2G2W155_CAPBA)
Solyc02g080890	WRKY transcription factor 6
Solyc06g074260	senescence regulator (Protein of unknown function%2C DUF584) (AHRD V3.3 *** AT3G15040.1)
Solyc09g007200	Pentatricopeptide repeat-containing protein
Solyc12g094490	Polyadenylation and cleavage factor-like protein 4 (AHRD V3.3 *** A0A2G2VIC5_CAPBA)
Solyc05g009670	Plasma-membrane choline transporter family protein (AHRD V3.3 *** A0A2U1PYZ6_ARTAN)
Solyc01g006680	2-oxoglutarate (2OG) and Fe(II)-dependent oxygenase superfamily protein (AHRD V3.3 *** A0A2U1NBL4_ARTAN)
Solyc04g076620	E3 ubiquitin-protein ligase UPL2 (AHRD V3.3 *** A0A2G2X032_CAPBA)
Solyc07g008340	ABC transporter E family member 2 (AHRD V3.3 *** A0A1J3F317_NOCCA)
Solyc08g007910	Serine/threonine-protein kinase EDR1 (AHRD V3.11 *** tr|A0A2G3BPY6|A0A2G3BPY6_CAPCH)
Solyc09g075480	Kinesin-4 (AHRD V3.3 *** A0A2G2W0J2_CAPBA)
Solyc12g014290	Multiprotein bridging factor 1 (AHRD V3.3 *** S4T643_CAPAN)
Solyc02g093400	Integral membrane protein MviN (AHRD V3.3 *-* A0A1Y1IAL8_KLENI)
Solyc01g099440	ATP-dependent DNA helicase (AHRD V3.11 *-* tr|A0A2G2XW06|A0A2G2XW06_CAPAN)
Solyc06g076770	Transcription factor DIVARICATA (AHRD V3.3 *** A0A2G2ZE22_CAPAN)
Solyc07g066030	Proteasome activator subunit 4 (AHRD V3.3 *** A0A2G2WFP4_CAPBA)
Solyc05g026540	transmembrane protein (Protein of unknown function DUF2359%2C transmembrane) (AHRD V3.3 *** AT1G23170.2)
Solyc07g055660	glycine-rich protein (AHRD V3.3 *-* AT3G06780.1)
Solyc03g025330	Transmembrane protein
Solyc01g101130	Myosin heavy chain
Solyc05g052030	ethylene response factor 4
Solyc02g078410	1
Solyc03g110980	hypothetical protein (AHRD V3.3 *** AT3G48490.1)
Solyc06g008130	SET-domain containing protein lysine methyltransferase family protein (AHRD V3.3 *-* F4K7E3_ARATH)
Solyc09g007560	50S ribosomal protein L5 (AHRD V3.3 *-* B6SST7_MAIZE)
Solyc11g073010	Exocyst subunit Exo70 family protein (AHRD V3.3 *** A0A2G2VNA4_CAPBA)
Solyc07g061900	50S ribosomal protein L4 (AHRD V3.3 *** B6TG27_MAIZE)
Solyc06g050930	Cytosolic endo-beta-N-acetylglucosaminidase-like protein (AHRD V3.3 *** A0A2K3NXL7_TRIPR)
Solyc01g088450	RING/U-box superfamily protein (AHRD V3.3 *-* A0A2U1LDD8_ARTAN)
Solyc07g053740	Ethylene Response Factor F.4
Solyc10g079470	gldhL-galactono-1
Solyc12g006800	myb family transcription factor EFM-like (AHRD V3.3 *** A0A2I4HNH6_9ROSI)
Solyc07g065540	Fasciclin-like arabinogalactan protein (AHRD V3.3 *** A0A2R6P548_ACTCH)
Solyc03g120890	GATA transcription factor (AHRD V3.3 *** K4BMN8_SOLLC)
Solyc03g006680	Adenine nucleotide alpha hydrolases-like superfamily protein (AHRD V3.3 *** A0A2U1N8C2_ARTAN)
Solyc10g081000	Unknown protein
Solyc02g087610	Pentatricopeptide repeat (AHRD V3.3 *** A0A200QFA4_9MAGN)
Solyc04g015940	ARM repeat superfamily protein (AHRD V3.3 *** F4JNL5_ARATH)
Solyc11g070030	NADH-quinone oxidoreductase subunit B (AHRD V3.3 *** A0A1V9H215_9XANT)
Solyc04g064490	Hexosyltransferase (AHRD V3.3 *** A0A2G2WYI5_CAPBA)
Solyc02g065470	Pathogenesis-related protein 1 (AHRD V3.3 *** A0A2K3L121_TRIPR)
Solyc07g066190	PRA1 family protein (AHRD V3.3 *** A0A2G2Z637_CAPAN)
Solyc04g078750	Late embryogenesis abundant protein (AHRD V3.3 *** A0A200QZD5_9MAGN)
Solyc11g067080	Serine/threonine-protein kinase D6PKL2 (AHRD V3.3 *** A0A2G2YHG1_CAPAN)
Solyc02g062910	Pentatricopeptide repeat-containing protein
Solyc03g098020	Alpha/beta-Hydrolases superfamily protein (AHRD V3.3 *** Q94AM5_ARATH)
Solyc03g122020	Transcription initiation factor TFIID subunit 12 (AHRD V3.3 *** A0A1U8G3D7_CAPAN)
Solyc08g077750	Decapping nuclease DXO-like protein
Solyc03g083390	Nuclear migration protein nudC (AHRD V3.11 *** tr|A0A1U8FZY1|A0A1U8FZY1_CAPAN)
Solyc09g065240	Patatin (AHRD V3.3 *** A0A2G3CVC2_CAPCH)
Solyc06g074530	Arogenate dehydratase (AHRD V3.3 *** A0A2G2VAY6_CAPBA)
Solyc05g009680	Eukaryotic aspartyl protease family protein (AHRD V3.3 *** Q9C6M0_ARATH)
Solyc01g109510	SWI/SNF complex subunit SWI3D (AHRD V3.3 *** A0A2I4FZ45_9ROSI)
Solyc11g010370	ENTH/ANTH/VHS superfamily protein (AHRD V3.3 *** A0A2U1QGP5_ARTAN)
Solyc06g074940	ATP-binding ABC transporter (AHRD V3.11 *** tr|X8JTB2|X8JTB2_9HOMO)
Solyc01g067640	Protein kinase domain (AHRD V3.3 *** A0A200Q1N4_9MAGN)
Solyc11g069090	ATP-binding ABC transporter (AHRD V3.3 *** X8JTB2_9HOMO)
Solyc12g099890	Protein SDA1 (AHRD V3.3 *** A0A2G3B5M7_CAPCH)
Solyc06g071290	Aldehyde dehydrogenase (AHRD V3.3 *** A0A0K9R405_SPIOL)
Solyc01g110520	Amidophosphoribosyltransferase (AHRD V3.3 *** A0A2G3BW41_CAPCH)
Solyc01g088710	metacaspase-1 (AHRD V3.3 *** A0A1U8ED67_CAPAN)
Solyc02g032800	Senescence regulator S40 (AHRD V3.3 *** A0A200QJC6_9MAGN)
Solyc12g007190	Protein tesmin/TSO1-like CXC 5 (AHRD V3.3 *-* A0A2G3BNP4_CAPCH)
Solyc01g091910	phospholipase PLDb2
Solyc09g092070	Rab-GTPase-TBC domain-containing protein (AHRD V3.11 *** tr|A0A2U1M9R1|A0A2U1M9R1_ARTAN)
Solyc07g063465	S-adenosyl-L-methionine-dependent methyltransferases superfamily protein (AHRD V3.11 *** tr|A0A2U1LBB5|A0A2U1LBB5_ARTAN)
Solyc03g118290	auxin response factor 2A
Solyc10g076720	glycine-rich protein DOT1-like (AHRD V3.3 *-* XP_019071531.1)
Solyc04g007560	BRO1 domain (AHRD V3.3 *** A0A200QUU8_9MAGN)
Solyc01g105290	BTB/POZ domain protein (AHRD V3.3 *** AT3G19920.2)
Solyc01g068580	Hepatocellular carcinoma-associated antigen 59 (AHRD V3.11 *-* tr|A0A200R1K4|A0A200R1K4_9MAGN)
Solyc11g010440	GLABRA2 expression modulator (AHRD V3.3 *** A0A2G3CDH1_CAPCH)
Solyc09g010860	Expansin (AHRD V3.11 *** tr|Q9ZP32|Q9ZP32_SOLLC)
Solyc02g092680	Subtilisin-like protease (AHRD V3.3 *** A9XG40_TOBAC)
Solyc02g087560	Pentatricopeptide repeat (AHRD V3.3 *** A0A200QC49_9MAGN)
Solyc08g078180	Ethylene Response Factor A.1
Solyc01g091520	Enoyl-CoA delta isomerase 1
Solyc02g086270	Protein kinase family protein (AHRD V3.3 *** A0A2U1MH78_ARTAN)
Solyc09g031650	Mediator of RNA polymerase II transcription subunit 12-like protein (AHRD V3.3 *-* A0A2K3MW60_TRIPR)
Solyc06g066270	Cytochrome P450 (AHRD V3.3 *-* A0A200PMQ1_9MAGN)
Solyc02g093140	CBS domain-containing protein CBSX1
Solyc06g048410	iron superoxide dismutase
Solyc06g082880	Pentatricopeptide repeat-containing protein (AHRD V3.3 *** A0A2G2ZEA4_CAPAN)
Solyc11g018550	Stromal ascorbate peroxidase (AHRD V3.11 *** tr|Q9TNL9|Q9TNL9_TOBAC)
Solyc05g053610	Pleiotropic drug resistance protein (AHRD V3.3 *** C8CA13_CUCSA)
Solyc01g066430	RING-H2 finger protein ATL2-like (AHRD V3.3 *** A0A2I4E8K9_9ROSI)
Solyc04g077230	Unknown protein
Solyc12g005780	traB domain-containing protein-like (AHRD V3.3 *** A0A2I4HRB9_9ROSI)
Solyc09g008770	Late embryogenesis abundant protein (AHRD V3.3 *** A0A200R5C6_9MAGN)
Solyc02g090510	CDPK-related protein kinase (AHRD V3.3 *** A0A2G3D8R0_CAPCH)
Solyc03g113970	Calmodulin binding protein-like (AHRD V3.3 *** A0A200QLB3_9MAGN)
Solyc04g010120	macrophage erythroblast attacher (AHRD V3.3 *** A0A2I4H326_9ROSI)
Solyc08g006670	mediator of RNA polymerase II transcription subunit 30-like (AHRD V3.3 *** A0A2I4EZZ4_9ROSI)
Solyc12g042900	Cytochrome c oxidase subunit 5b-1
Solyc02g080340	Patatin (AHRD V3.3 *** A0A2I4H6Z2_9ROSI)
Solyc03g113610	Polynucleotide 5'-hydroxyl-kinase NOL9 (AHRD V3.11 *** tr|A0A2G2WRJ2|A0A2G2WRJ2_CAPBA)
Solyc06g150130	Dof zinc finger protein PBF (AHRD V3.3 *** A0A2G2WLZ1_CAPBA)
Solyc03g026110	SUN-like protein 8
Solyc01g080900	Cytochrome P450 (AHRD V3.11 *** tr|A0A200PPF3|A0A200PPF3_9MAGN)
Solyc02g078540	Clathrin light chain (AHRD V3.3 *-* A0A2G3D6A8_CAPCH)
Solyc09g013070	Steroid 5-alpha-reductase DET2 (AHRD V3.3 *-* A0A1U8EBY8_CAPAN)
Solyc04g078460	Isoaspartyl peptidase/L-asparaginase (AHRD V3.3 *** A0A1U8GBV5_CAPAN)
Solyc06g069770	protein DCL
Solyc12g056510	Trihelix transcription factor GTL1 (AHRD V3.3 *** A0A2G3B3E4_CAPCH)
Solyc02g069800	Alpha/beta-Hydrolases superfamily protein (AHRD V3.3 *** A0A2U1PVQ0_ARTAN)
Solyc12g035490	Zn-dependent exopeptidases superfamily protein (AHRD V3.3 *-* F4HRW2_ARATH)
Solyc07g063870	Uncharacterized conserved protein (UCP012943) (AHRD V3.3 *-* AT5G54540.1)
Solyc11g012060	hypothetical protein (AHRD V3.3 *-* AT1G12020.1)
Solyc03g095780	abscisic acid receptor PYL4-like (AHRD V3.3 *** A0A2I4EQL0_9ROSI)
Solyc02g087970	Mini zinc finger protein (AHRD V3.3 *** A0ZXL1_SOLLC)
Solyc05g056220	N6-adenosine-methyltransferase subunit METTL14 (AHRD V3.3 *** A0A2G2ZKU5_CAPAN)
Solyc07g005400	bHLH transcription factor 050
Solyc10g050860	DNA-binding protein AY506544
Solyc01g102340	R2R3MYB transcription factor 61
Solyc03g115220	Flavonoid 3'-monooxygenase (AHRD V3.11 *** tr|A0A2G2WR53|A0A2G2WR53_CAPBA)
Solyc01g080620	BTB/POZ domain-containing protein (AHRD V3.3 *** A0A2U1P225_ARTAN)
Solyc08g080150	TCP transcription factor 20
Solyc11g069290	Pyridoxal 5'-phosphate synthase subunit PdxT (AHRD V3.3 *** A0A1V4EC63_9ACTN)
Solyc03g111850	Indole-3-glycerol phosphate synthase (AHRD V3.3 *** A0A2G3CCR7_CAPCH)
Solyc09g010430	Unknown protein
Solyc08g082810	Beta-amylase (AHRD V3.3 *** A0A2G2XJX5_CAPBA)
Solyc01g009090	Serrate RNA effector molecule (AHRD V3.3 *** A0A2G3AI64_CAPAN)
Solyc06g067940	Cytochrome c oxidase subunit 5b-1
Solyc04g078120	protein arginine N-methyltransferase 2 (AHRD V3.3 *** A0A2I4DLH8_9ROSI)
Solyc03g117210	hypothetical protein Chr1
Solyc02g086220	Alpha/beta-Hydrolases superfamily protein (AHRD V3.3 *** Q9FF34_ARATH)
Solyc06g051010	Peptide-N4-(N-acetyl-beta-glucosaminyl)asparagine amidase A (AHRD V3.3 *** A0A200PX65_9MAGN)
Solyc11g073110	Protein UPSTREAM OF FLC (AHRD V3.3 *** A0A2G2VN71_CAPBA)
Solyc10g007350	Multiprotein bridging factor 1 (AHRD V3.3 *** S4T643_CAPAN)
Solyc07g054290	Photosystem II Psb27 protein (AHRD V3.3 *-* A0A1Y1IAK8_KLENI)
Solyc09g010130	Sorting nexin 1-like protein (AHRD V3.3 *** A0A0K0XR75_TOBAC)
Solyc04g079710	Wall-associated receptor kinase-like 14 (AHRD V3.11 *** tr|A0A1U8GBI3|A0A1U8GBI3_CAPAN)
Solyc09g082970	Pyruvate kinase (AHRD V3.3 *** A0A2G2W137_CAPBA)
Solyc04g072400	hypothetical protein (AHRD V3.3 *** AT1G36320.1)
Solyc12g043100	Pentatricopeptide repeat-containing protein (AHRD V3.3 *** A0A2G2XLI8_CAPBA)
Solyc03g116740	Phosphatidylcholine
Solyc11g005020	Protein translocase subunit SecA (AHRD V3.3 *** A0A1J7H8J9_LUPAN)
Solyc05g056170	Phenylalanine ammonia-lyase (AHRD V3.3 *** A0A2G2WVC6_CAPBA)
Solyc07g065670	Cellulose synthase-like protein E1 (AHRD V3.3 *-* A0A2G3C2E8_CAPCH)
Solyc08g076730	Tetratricopeptide repeat (TPR)-like superfamily protein (AHRD V3.11 *-* tr|Q0WUZ1|Q0WUZ1_ARATH)
Solyc10g011940	SNF2_N domain-containing protein/Chromo domain-containing protein (AHRD V3.3 *-* A0A1Q3BJ60_CEPFO)
Solyc12g055780	KH domain-containing protein (AHRD V3.3 *** A0A1J3JPM9_NOCCA)
Solyc04g014320	protein PELPK2-like (AHRD V3.3 *** XP_010319535.1)
Solyc05g051970	Alpha-ketoglutarate-dependent dioxygenase alkB-like protein 2 (AHRD V3.11 *** tr|A0A2G2X511|A0A2G2X511_CAPBA)
Solyc05g051460	Homeobox-leucine zipper protein HOX4 (AHRD V3.3 *** A0A2G2Y5D1_CAPAN)
Solyc02g088700	Mitochondrial processing peptidase (AHRD V3.3 *** Q41444_SOLTU)
Solyc02g092860	Cytochrome P450 (AHRD V3.3 *** Q9XFX1_CICAR)
Solyc07g009330	60S acidic ribosomal protein P3 (AHRD V3.11 *** tr|A0A2G2Z2E6|A0A2G2Z2E6_CAPAN)
Solyc01g096000	Late embryogenesis abundant (LEA) hydroxyproline-rich glycoprotein family (AHRD V3.3 *** Q9T0A8_ARATH)
Solyc05g054570	CRAL-TRIO lipid binding domain-containing protein (AHRD V3.3 *** A0A2U1PXE9_ARTAN)
Solyc02g091930	Homeobox-leucine zipper protein HOX27 (AHRD V3.3 *** A0A2G3D8F8_CAPCH)
Solyc03g118510	Ovary receptor kinase 27 (AHRD V3.3 *** S4WIQ7_SOLCH)
Solyc04g071040	Regulator of chromosome condensation (RCC1) family protein (AHRD V3.3 *** A0A1P8B4Z7_ARATH)
Solyc07g063880	Beta-glucosidase 34 (AHRD V3.3 *** A0A2G2Z5D2_CAPAN)
Solyc03g044860	HTH-type transcriptional regulator (AHRD V3.3 *-* A0A2P5FXV7_TREOI)
Solyc03g114380	Kinesin-like protein (AHRD V3.3 *** A0A2G3CYT4_CAPCH)
Solyc09g063010	Basic helix-loop-helix (BHLH) DNA-binding superfamily protein (AHRD V3.11 *-* tr|A0A2H1ZEQ1|A0A2H1ZEQ1_ARATH)
Solyc03g123920	Ubiquitin-specific protease family C19 protein (AHRD V3.3 *** A0A2K3NKS0_TRIPR)
Solyc05g006520	Pyruvate dehydrogenase E1 component subunit alpha (AHRD V3.11 *** tr|A0A1U8EUA7|A0A1U8EUA7_CAPAN)
Solyc04g055050	VQ motif-containing protein (AHRD V3.3 *-* Q9C8B9_ARATH)
Solyc12g008600	DUF1005 family protein (DUF1005) (AHRD V3.3 *** Q9M0F0_ARATH)
Solyc02g091130	ATP synthase subunit beta (AHRD V3.3 *** Q9ZR78_NICSY)
Solyc01g091360	DUF1499 family protein Chr3
Solyc09g075450	Fumarate hydratase class II (AHRD V3.3 *** A0A248JQX4_9PROT)
Solyc10g051140	Protein ENHANCED DOWNY MILDEW 2 (AHRD V3.11 *** tr|A0A2G2YIJ3|A0A2G2YIJ3_CAPAN)
Solyc11g008260	Cysteine proteinase 15A (AHRD V3.3 *** A0A1U8EZ26_CAPAN)
Solyc01g009970	Hydrolase (AHRD V3.3 *** A0A2U1P3E1_ARTAN)
Solyc05g006640	Phospholipid-transporting ATPase (AHRD V3.3 *** A0A1U8EVI0_CAPAN)
Solyc02g088560	Cyclic nucleotide-gated ion channel protein
Solyc02g083410	Phytoene dehydrogenase chloroplastic chromoplastic-like (AHRD V3.3 *** A0A2K3LEN1_TRIPR)
Solyc02g091100	2-hydroxyacyl-CoA lyase (AHRD V3.3 *** A0A2G3D874_CAPCH)
Solyc03g114290	CASP-like protein (AHRD V3.3 *** A0A2G3CYS8_CAPCH)
Solyc04g077470	Cellulose synthase-like C4
Solyc02g090870	hypothetical protein (AHRD V3.3 *** AT5G67020.1)
Solyc03g123630	pectin methylesterase pmeu1
Solyc04g071510	Protein ABSCISIC ACID-INSENSITIVE 5 (AHRD V3.3 *** A0A2G3CMZ5_CAPCH)
Solyc06g062790	Casein kinase I isoform epsilon (AHRD V3.3 *** A0A1U8HDP9_CAPAN)
Solyc06g074960	Dolichol kinase (AHRD V3.3 *** A0A1J3I6T5_NOCCA)
Solyc02g084210	GDP-mannose 4
Solyc03g119050	SANT/Myb domain (AHRD V3.3 *-* A0A200PR03_9MAGN)
Solyc02g089990	HTH-type transcriptional regulator (AHRD V3.3 *** A0A2P5FXV7_TREOI)
Solyc04g011580	Pumilio-like protein 3 (AHRD V3.3 *** A0A2G2XA68_CAPBA)
Solyc08g078320	E3 ubiquitin-protein ligase HOS1 (AHRD V3.3 *** A0A2G2XL48_CAPBA)
Solyc06g008520	Bet1-like SNARE 1-1 (AHRD V3.3 *** A0A2G3CVD5_CAPCH)
Solyc09g092160	beta-galactosidase 2
Solyc02g087400	Ankyrin repeat-containing protein (AHRD V3.3 *** A0A2U1KW09_ARTAN)
Solyc05g054720	Protein TIC 20-I
Solyc05g005650	methyl-CpG-binding domain-containing protein 9 isoform X1 (AHRD V3.3 *-* XP_004239350.1)
Solyc05g015520	F-box family protein (AHRD V3.3 *** B8Y9B5_PONTR)
Solyc05g051510	Prohibitin (AHRD V3.11 *** tr|O04361|O04361_TOBAC)
Solyc03g118200	Calcium-dependent phospholipid-binding Copine family protein (AHRD V3.3 *** A0A2U1NDK1_ARTAN)
Solyc10g079850	AP-5 complex subunit beta-like protein (AHRD V3.3 *** Q9LT22_ARATH)
Solyc07g062860	26S proteasome non-ATPase regulatory subunit 5 (AHRD V3.3 *** A0A200QM10_9MAGN)
Solyc03g112350	RNA helicase DEAD12
Solyc09g083150	NADH dehydrogenase-like complex N (AHRD V3.11 *** tr|A0A0F7GZG2|A0A0F7GZG2_9ROSI)
Solyc05g042050	Drug/metabolite transporter (AHRD V3.3 *-* A0A200RBC1_9MAGN)
Solyc01g107290	RING/U-box superfamily protein (AHRD V3.3 *-* A0A2U1QJN2_ARTAN)
Solyc03g119590	NIMIN2c protein (AHRD V3.3 *** A0FJY4_TOBAC)
Solyc05g012770	WRKY transcription factor 4
Solyc05g051240	aspartic proteinase PCS1 (AHRD V3.3 *** A0A1U8GYE6_CAPAN)
Solyc07g045220	ARM repeat superfamily protein (AHRD V3.3 *** Q9SU15_ARATH)
Solyc08g082000	hypothetical protein Chr5
Solyc03g111400	Adenine/guanine permease AZG1 (AHRD V3.3 *** A0A2G2X883_CAPBA)
Solyc04g080930	Peroxisome biogenesis factor 10 (AHRD V3.3 *** A0A2G2YWQ5_CAPAN)
Solyc01g097290	auxin-regulated IAA16
Solyc06g071120	Ubiquitin carboxyl-terminal hydrolase-related protein (AHRD V3.3 *** F4JCR3_ARATH)
Solyc01g094580	Beta-amylase (AHRD V3.3 *** A0A2G2W5P7_CAPBA)
Solyc07g020710	Protein tesmin/TSO1-like CXC 5 (AHRD V3.3 *** A0A2G3BNP4_CAPCH)
Solyc02g021760	Zinc finger transcription factor 16
Solyc03g063560	Glutamate synthase (AHRD V3.3 *** W7TEE5_9STRA)
Solyc03g114020	D-ribose-binding periplasmic protein (AHRD V3.3 *** A0A2P5CJ45_PARAD)
Solyc04g009180	TCP transcription factor 14
Solyc06g053600	Aldo/keto reductase (AHRD V3.3 *** A0A200QWT0_9MAGN)
Solyc01g096470	Sequence-specific DNA binding transcription factor (AHRD V3.3 *** A0A1I9LTW1_ARATH)
Solyc02g082140	galactan beta-1
Solyc10g007180	Multiple organellar RNA editing factor 8
Solyc12g005760	Peroxisome biogenesis protein 22 (AHRD V3.3 *** A0A1U8EC78_CAPAN)
Solyc01g087890	Plasma-membrane choline transporter family protein (AHRD V3.3 *** F4K425_ARATH)
Solyc06g060230	NAC domain-containing protein (AHRD V3.3 *** A0A2K3N804_TRIPR)
Solyc02g087720	Transmembrane protein (AHRD V3.3 *** Q9LHA3_ARATH)
Solyc01g068270	Protein kinase family protein (AHRD V3.3 *** S8DW53_9LAMI)
Solyc02g068380	Allantoate deiminase/N-carbamoyl-L-amino-acid hydrolase (AHRD V3.3 *** A0A316ELX8_9BURK)
Solyc04g072240	Oxidoreductase (AHRD V3.3 *** A0A2U1NRZ1_ARTAN)
Solyc05g009820	Hexosyltransferase (AHRD V3.11 *** tr|A0A2G2YCM5|A0A2G2YCM5_CAPAN)
Solyc05g006550	Microtubule-associated protein TORTIFOLIA1 (AHRD V3.3 *-* A0A1J3JY05_NOCCA)
Solyc01g103680	DUF1682 domain-containing protein (AHRD V3.3 *** A0A1Q3D239_CEPFO)
Solyc02g064950	CBS domain-containing protein (AHRD V3.3 *** A0A1Q3DGW2_CEPFO)
Solyc04g076530	GATA transcription factor 28 (AHRD V3.3 *** A0A2G3CP85_CAPCH)
Solyc12g006120	Nuclear transcription factor Y subunit B (AHRD V3.3 *-* A0A2G2X323_CAPBA)
Solyc03g063220	RNA helicase DEAH-box8
Solyc03g078020	Peptide chain release factor 1 (AHRD V3.3 *** A0A1J3H9D8_NOCCA)
Solyc02g086740	50S ribosomal protein L12
Solyc03g094090	Polyadenylate-binding protein (AHRD V3.3 *-* G5DWR4_SILLA)
Solyc03g112070	D-3-phosphoglycerate dehydrogenase (AHRD V3.3 *** A0A1U8FY27_CAPAN)
Solyc04g079690	Protein kinase domain-containing protein (AHRD V3.3 *** A0A2U1M8U4_ARTAN)
Solyc11g010190	Prohibitin (AHRD V3.3 *** O04361_TOBAC)
Solyc10g077130	calmodulin-binding protein 25-like (AHRD V3.3 *** A0A2I4GIE5_9ROSI)
Solyc03g116360	Regulator of chromosome condensation (RCC1) family protein (AHRD V3.3 *** A0A1I9LLL7_ARATH)
Solyc08g062820	Cytokinin riboside 5'-monophosphate phosphoribohydrolase (AHRD V3.3 *** A0A2G3BRK1_CAPCH)
Solyc09g092250	Zinc finger transcription factor 55
Solyc01g068020	Polyketide cyclase / dehydrase and lipid transport protein (AHRD V3.3 *** Q1G3L2_ARATH)
Solyc01g068620	Polyketide cyclase / dehydrase and lipid transport protein (AHRD V3.3 *** Q9M120_ARATH)
Solyc01g095040	C-terminal binding protein AN (AHRD V3.3 *** A0A2G3BT74_CAPCH)
Solyc06g049020	hypothetical protein (AHRD V3.3 *** AT3G56360.1)
Solyc07g042460	Respiratory burst oxidase-like protein A (AHRD V3.3 *** A0A2G2WBJ4_CAPBA)
Solyc12g013750	Mannan endo-1
Solyc11g017000	DUF668 domain-containing protein/DUF3475 domain-containing protein (AHRD V3.3 *** A0A1Q3CI27_CEPFO)
Solyc06g005850	RING/FYVE/PHD zinc finger superfamily protein (AHRD V3.3 *** B6SN54_MAIZE)
Solyc01g005330	Microtubule-associated protein 70 (AHRD V3.3 *** A0A200QNX4_9MAGN)
Solyc04g076380	NADPH--cytochrome P450 reductase (AHRD V3.3 *** A0A2G3CP38_CAPCH)
Solyc06g069150	hypothetical protein (AHRD V3.3 *** AT1G13360.1)
Solyc11g005050	Mitochondrial ATP synthase subunit (AHRD V3.3 *** A0A2K3PHV4_TRIPR)
Solyc05g050830	Ethylene-responsive transcription factor (AHRD V3.3 *** A0A2G2WT45_CAPBA)
Solyc03g034270	Alpha/beta-Hydrolases superfamily protein (AHRD V3.3 *** Q9FF34_ARATH)
Solyc08g079170	Hsp70-Hsp90 organizing protein 1 (AHRD V3.3 *** A0A1U8GC69_CAPAN)
Solyc01g111140	Protein XAP5 CIRCADIAN TIMEKEEPER (AHRD V3.3 *** A0A2G2Y2K1_CAPAN)
Solyc01g104540	C-jun-amino-terminal kinase-interacting protein (AHRD V3.3 *-* AT1G36990.1)
Solyc03g117190	extensin-1-like (AHRD V3.3 *-* XP_019068238.1)
Solyc08g079600	hypothetical protein (AHRD V3.3 *-* AT2G27830.1)
Solyc04g015580	Arm repeat superfamily protein (AHRD V3.3 *** A0A2K3NTC9_TRIPR)
Solyc03g079900	Ras GTPase (AHRD V3.3 *** K2QMU3_MACPH)
Solyc06g076220	expansin18
Solyc07g055910	hypothetical protein (AHRD V3.3 *-* AT3G58770.1)
Solyc03g120740	hypothetical protein (AHRD V3.3 *** AT1G15230.1)
Solyc03g113640	Putative serine esterase family protein (AHRD V3.3 *** AT1G58350.4)
Solyc06g036300	Homeodomain-like superfamily protein (AHRD V3.3 *** A0A2U1MBK2_ARTAN)
Solyc12g097040	small acidic protein 1 (AHRD V3.3 --* AT4G13520.2)
Solyc08g074550	Threonine--tRNA ligase
Solyc10g086280	heavy metal-associated isoprenylated plant protein 3-like (AHRD V3.3 *** A0A1S4A3L2_TOBAC)
Solyc09g008850	Uridylate kinase (AHRD V3.3 *** A0A2G2YPJ3_CAPAN)
Solyc01g088820	trihelix transcription factor ASIL2-like (AHRD V3.3 *** A0A2I4HF85_9ROSI)
Solyc05g006100	Thiol-disulfide oxidoreductase DCC family protein (AHRD V3.3 *-* A0A2N9Z422_PAEPO)
Solyc06g084480	protease Do-like 2
Solyc07g055840	Citrate synthase (AHRD V3.3 *** A0A2G2WEG9_CAPBA)
Solyc12g019460	mitogen-activated protein kinase 1
Solyc06g016790	proline-rich receptor-like protein kinase PERK13 (AHRD V3.3 *** XP_004240680.1)
Solyc01g104740	Multiprotein-bridging factor 1c (AHRD V3.3 *** A0A1U8F6N4_CAPAN)
Solyc07g049590	BTB/POZ domain-containing protein (AHRD V3.3 *** A0A2G2WD17_CAPBA)
Solyc09g009140	Gamma-tubulin complex component (AHRD V3.3 *** A0A2G3BIR4_CAPCH)
Solyc03g083996	Bifunctional inhibitor/lipid-transfer protein/seed storage 2S albumin superfamily protein (AHRD V3.3 *-* A0A2U1PU47_ARTAN)
Solyc10g006240	Pyridoxal phosphate homeostasis protein (AHRD V3.3 *** A0A2G2VR44_CAPBA)
Solyc06g072270	RING/U-box superfamily protein (AHRD V3.3 *-* A0A1I9LQQ9_ARATH)
Solyc02g068360	Tafazzin family protein (AHRD V3.3 *** A0A1U8FTW9_CAPAN)
Solyc04g074840	Protein DETOXIFICATION (AHRD V3.3 *** A0A218X5P1_PUNGR)
Solyc06g076040	RING-type E3 ubiquitin transferase (AHRD V3.3 *** A0A2G2WNK7_CAPBA)
Solyc07g006280	Tetraspanin (AHRD V3.3 *** A0A200Q8V3_9MAGN)
Solyc11g065670	60S ribosomal protein L12 (AHRD V3.3 *** Q6RJY1_CAPAN)
Solyc05g008060	SlPIN4
Solyc05g024235	Enoyl CoA hydratase-like protein (AHRD V3.3 *** Q8RUL6_ORYSJ)
Solyc06g035710	Protein DETOXIFICATION (AHRD V3.3 *** A0A1Q3CGT0_CEPFO)
Solyc02g088350	glutamate NMDA receptor subunit epsilon-1%2C putative (DUF3598) Chr3
Solyc05g008350	ABC transporter G family member 7 (AHRD V3.3 *** A0A2G2XVV0_CAPAN)
Solyc06g069700	Pentatricopeptide repeat (PPR) superfamily protein (AHRD V3.3 *** A0A2U1KU72_ARTAN)
Solyc08g006700	Enhancer of rudimentary-like protein (AHRD V3.3 *** A0A2G2Y1B7_CAPAN)
Solyc11g012440	RING-type E3 ubiquitin transferase (AHRD V3.3 *** A0A2I0XD88_9ASPA)
Solyc07g008040	TOPLESS 5
Solyc10g083920	Serine/threonine protein phosphatase 2A regulatory subunit (AHRD V3.3 *** A0A2G2VUQ8_CAPBA)
Solyc06g075170	Senescence regulator S40 (AHRD V3.3 *** A0A200QID2_9MAGN)
Solyc09g074710	Homeobox protein LUMINIDEPENDENS (AHRD V3.3 *-* A0A2G2ZWA4_CAPAN)
Solyc05g014275	DUF659 domain-containing protein/Dimer_Tnp_hAT domain-containing protein (AHRD V3.3 *** A0A1Q3C897_CEPFO)
Solyc05g050630	Tetratricopeptide repeat (TPR)-like superfamily protein (AHRD V3.11 *** tr|A0A2U1QFM4|A0A2U1QFM4_ARTAN)
Solyc06g082010	Zinc finger transcription factor 48
Solyc08g067090	cyclophilin-like protein
Solyc07g042260	Auxin Response Factor 7
Solyc02g065360	Protein root UVB sensitive 4 (AHRD V3.3 *** A0A1U8FR98_CAPAN)
Solyc04g057990	Zinc finger transcription factor 33
Solyc04g082910	Calvin cycle protein CP12-3
Solyc07g065760	Coiled-coil protein (AHRD V3.3 *** F4I1X8_ARATH)
Solyc09g074950	P-loop containing nucleoside triphosphate hydrolases superfamily protein (AHRD V3.3 *** A0A2U1N2C4_ARTAN)
Solyc05g050110	DUF2358 domain-containing protein (AHRD V3.3 *** A0A1Q3BPE1_CEPFO)
Solyc01g086860	Expressed protein (AHRD V3.3 *** AT4G25315.2)
Solyc01g088530	hypothetical protein (AHRD V3.3 *** AT2G44600.1)
Solyc02g063520	Homeobox-leucine zipper protein HAT22 (AHRD V3.11 *** tr|A0A2G2XBJ3|A0A2G2XBJ3_CAPBA)
Solyc02g065790	Haloacid dehalogenase-like hydrolase (HAD) superfamily protein (AHRD V3.3 *-* A0A1I9LMI0_ARATH)
Solyc03g031840	Expansin (AHRD V3.11 *** tr|Q9ZP33|Q9ZP33_SOLLC)
Solyc03g096890	Serine/threonine-protein kinase TIO (AHRD V3.3 *** A0A1U8FYB3_CAPAN)
Solyc09g011340	protein RETICULATA
Solyc06g074790	Histone H2B (AHRD V3.11 *-* tr|A0A2G3CAQ8|A0A2G3CAQ8_CAPCH)
Solyc10g039190	WD40 repeat (AHRD V3.3 *** A0A200R5H2_9MAGN)
Solyc12g057110	14-3-3 protein (AHRD V3.3 *** P93786_SOLTU)
Solyc03g007100	Cleavage and polyadenylation specificity factor subunit 1 (AHRD V3.3 *** A0A1J3DYG9_NOCCA)
Solyc06g071910	3-oxoacyl-[acyl-carrier-protein] reductase
Solyc06g074740	LEU86662 VPS41
Solyc10g076510	Pyruvate decarboxylase (AHRD V3.3 *** Q8H9C6_SOLTU)
Solyc04g079270	Sorting and assembly machinery component 50-like protein (AHRD V3.3 *** A0A1J3DIC1_NOCCA)
Solyc03g116030	RING/FYVE/PHD zinc finger superfamily protein (AHRD V3.11 *** tr|A0A2U1NXA0|A0A2U1NXA0_ARTAN)
Solyc03g083550	UDP-glucuronate 4-epimerase 4 (AHRD V3.3 *** A0A1J3F7T2_NOCCA)
Solyc05g026310	Derlin (AHRD V3.3 *** A0A2G3CG93_CAPCH)
Solyc08g006530	Zinc finger protein CONSTANS-LIKE 4 (AHRD V3.11 *** tr|A0A2G2W4F6|A0A2G2W4F6_CAPBA)
Solyc12g099000	S-adenosylmethionine synthase (AHRD V3.3 *** A0A2G2VJM2_CAPBA)
Solyc01g099160	Lipoxygenase (AHRD V3.11 *** tr|Q9FT17|Q9FT17_SOLLC)
Solyc03g007790	G-type lectin S-receptor-like serine/threonine-protein kinase (AHRD V3.3 *** A0A2G3CWU6_CAPCH)
Solyc03g095720	Transcription elongation factor TFIIS (AHRD V3.3 *** A0A2G2X4U9_CAPBA)
Solyc04g009380	S-acyltransferase (AHRD V3.3 *** A0A2G3CEE4_CAPCH)
Solyc04g072830	P-loop containing nucleoside triphosphate hydrolases superfamily protein (AHRD V3.3 *** A0A2U1QEJ7_ARTAN)
Solyc06g063060	Dormancy/auxin associated protein (AHRD V3.3 *-* A0A2K3JP12_TRIPR)
Solyc07g005030	Dicer-like 4
Solyc06g034290	Glycerol-3-phosphate transporter 1-like protein (AHRD V3.3 *** A0A2K3PR18_TRIPR)
Solyc12g014230	Multiple organellar RNA editing factor 8
Solyc04g010210	ABC transporter G family member (AHRD V3.3 *** A0A2K3PJ14_TRIPR)
Solyc12g042990	CASC3/Barentsz eIF4AIII binding protein (AHRD V3.3 *** AT1G80000.3)
Solyc02g067980	Serine/threonine protein phosphatase 2A regulatory subunit (AHRD V3.3 *** A0A1U8FK60_CAPAN)
Solyc07g055120	F-box protein MAX2 (AHRD V3.3 *** A0A1U8HC06_CAPAN)
Solyc00g014790	Unknown protein
Solyc11g040173	Unknown protein
Solyc10g005930	Histidine biosynthesis bifunctional protein hisIE (AHRD V3.3 *** B6TR63_MAIZE)
Solyc02g079410	Adenine nucleotide alpha hydrolases-like superfamily protein (AHRD V3.3 *** A0A1P8BH73_ARATH)
Solyc02g086760	transmembrane protein (AHRD V3.3 *** AT3G01516.2)
Solyc10g081590	Protein-lysine N-methyltransferase (AHRD V3.3 *** B6T9S3_MAIZE)
Solyc04g056540	Riboflavin biosynthesis protein RibD (AHRD V3.3 *** A0A1Y1HVZ2_KLENI)
Solyc10g083490	Cell division protein FtsZ (AHRD V3.3 *** A0A2G2VUU5_CAPBA)
Solyc04g079400	MAP kinase kinase kinase 35
Solyc03g119690	Eukaryotic aspartyl protease family protein (AHRD V3.3 *** Q9C6M0_ARATH)
Solyc02g062370	Zinc finger CCCH domain-containing protein 19 (AHRD V3.3 *** A0A2G2XGC4_CAPBA)
Solyc09g008790	SRSF protein kinase 1 (AHRD V3.3 *** A0A1U8EHQ6_CAPAN)
Solyc04g074710	Queuine tRNA-ribosyltransferase (AHRD V3.3 *** S8D4U6_9LAMI)
Solyc03g025910	transmembrane protein (AHRD V3.3 *** AT4G00585.1)
Solyc06g074820	tonoplast intrinsic protein 1.1
Solyc01g099600	heavy metal-associated isoprenylated plant protein 3-like (AHRD V3.3 *** A0A1S3XS77_TOBAC)
Solyc10g081830	Replication protein A 32 kDa subunit B (AHRD V3.3 *** A0A2G3AVL9_CAPCH)
Solyc02g021700	Alpha N-terminal protein methyltransferase 1 (AHRD V3.11 *** tr|A0A1U8FFG8|A0A1U8FFG8_CAPAN)
Solyc07g045050	4-hydroxyphenylpyruvate dioxygenase (AHRD V3.3 *** A0A1U8GPG9_CAPAN)
Solyc09g091020	Transducin family protein / WD-40 repeat family protein (AHRD V3.3 *** Q94C94_ARATH)
Solyc10g085040	Heme-binding-like protein (AHRD V3.3 *** A0A2I0X8X3_9ASPA)
Solyc12g007280	Casein kinase I isoform epsilon (AHRD V3.11 *** tr|A0A2G2X3F7|A0A2G2X3F7_CAPBA)
Solyc04g007270	PHD finger protein (AHRD V3.3 *** A0A2G2WSU8_CAPBA)
Solyc06g065570	N-alpha-acetyltransferase 50 (AHRD V3.3 *** A0A1U8GUI6_CAPAN)
Solyc03g120150	Late embryogenesis abundant (LEA) hydroxyproline-rich glycoprotein family (AHRD V3.3 *-* A0A2U1N5H2_ARTAN)
Solyc01g107190	LOB domain-containing protein 38 (AHRD V3.3 *** A0A2G2V731_CAPBA)
Solyc02g081150	serine/arginine repetitive matrix-like protein (AHRD V3.3 *** AT4G22190.1)
Solyc01g098750	RING/U-box superfamily protein (AHRD V3.11 *** tr|A0A2U1KJJ9|A0A2U1KJJ9_ARTAN)
Solyc10g008950	Guanylate-binding family protein (AHRD V3.3 *** A0A2U1PP48_ARTAN)
Solyc11g068740	Methyl-CpG-binding domain protein 2 (AHRD V3.3 *** A0A2G2V439_CAPBA)
Solyc02g070240	Zinc finger transcription factor 17
Solyc07g045100	Eukaryotic aspartyl protease family protein (AHRD V3.3 *** G7KD30_MEDTR)
Solyc11g045250	Peptidase M28 (AHRD V3.3 *** A0A2U1PM28_ARTAN)
Solyc11g065870	GTPase Der (AHRD V3.3 *** A0A2G2VNZ8_CAPBA)
Solyc06g062960	DUF1677 domain-containing protein (AHRD V3.3 *** A0A1Q3B0U5_CEPFO)
Solyc11g007930	Histone H2B (AHRD V3.3 *** A0A328DBY2_9ASTE)
Solyc04g081740	prostaglandin E synthase 2-like (AHRD V3.3 *** A0A2I4DI11_9ROSI)
Solyc11g006970	ACT domain-containing protein (AHRD V3.3 *** A0A1Q3CPR0_CEPFO)
Solyc11g065350	ABC transporter G family member 12 (AHRD V3.3 *** A0A2G3B9R8_CAPCH)
Solyc02g069290	RING-type E3 ubiquitin transferase (AHRD V3.3 *-* A0A218W8P0_PUNGR)
Solyc02g083750	DNA-binding storekeeper transcriptional regulator (AHRD V3.3 *-* A0A2K3LQD1_TRIPR)
Solyc09g031780	Protein
Solyc09g065520	Homocysteine S-methyltransferase (AHRD V3.11 *** tr|A0A200QYH8|A0A200QYH8_9MAGN)
Solyc07g007780	Calmodulin-binding receptor-like cytoplasmic kinase 3 (AHRD V3.3 *** A0A1U8HFI8_CAPAN)
Solyc07g021750	Cytidine deaminase 1 (AHRD V3.3 *** A0A2G3CQ34_CAPCH)
Solyc06g051020	Peptide-N4-(N-acetyl-beta-glucosaminyl)asparagine amidase A (AHRD V3.3 *** A0A200PX65_9MAGN)
Solyc11g005720	VQ motif family protein (AHRD V3.3 *** B6SZE5_MAIZE)
Solyc05g052850	R2R3MYB transcription factor 109
Solyc11g008800	type I inositol polyphosphate 5-phosphatase 12-like (AHRD V3.3 *** A0A2I4G632_9ROSI)
Solyc02g086310	lipid-transfer protein 7k-LTP precursor (AHRD V3.3 --* NP_001306883.1)
Solyc04g081090	V-type proton ATPase proteolipid subunit (AHRD V3.3 *** A0A2G3AAA7_CAPAN)
Solyc06g005970	Glycosyl hydrolase family protein (AHRD V3.3 *** A0A2U1PL05_ARTAN)
Solyc06g060740	Zinc finger protein (AHRD V3.3 *** A0A200PXY0_9MAGN)
Solyc02g080520	Actin cytoskeleton-regulatory complex pan-like protein (AHRD V3.3 *** Q9LPT5_ARATH)
Solyc07g064950	Trigger factor (AHRD V3.3 *** A0A200RBE3_9MAGN)
Solyc09g010050	Cullin (AHRD V3.3 *** A0A2U1Q0J3_ARTAN)
Solyc09g074400	Transducin/WD40 repeat-like superfamily protein (AHRD V3.3 *** A0A1P8B6P4_ARATH)
Solyc09g092240	small subunit processome component 20 homolog isoform X1 (AHRD V3.3 *** A0A2I4HWH3_9ROSI)
Solyc11g073190	UDP-galactose/UDP-glucose transporter 5B (AHRD V3.3 *** A0A2G3BA03_CAPCH)
Solyc01g100650	NHL repeat-containing protein 2-like (AHRD V3.3 *** A0A2K3NND0_TRIPR)
Solyc04g078390	F-box protein GID2 (AHRD V3.3 *** A0A2G2ZRI1_CAPAN)
Solyc01g005385	Histone-lysine N-methyltransferase setd3 (AHRD V3.11 *-* tr|A0A1J3IHK0|A0A1J3IHK0_NOCCA)
Solyc05g054840	cilia- and flagella-associated protein 298-B-like isoform X1 (AHRD V3.3 *** XP_010321365.1)
Solyc10g080320	Adenylosuccinate synthetase (AHRD V3.3 *** S8CIB7_9LAMI)
Solyc02g062100	Senescence/dehydration-associated protein-like protein (AHRD V3.11 *** tr|A0A1P8AYB1|A0A1P8AYB1_ARATH)
Solyc03g007490	Cytochrome c oxidase assembly protein COX16 (AHRD V3.3 *-* A0A2U1MEP7_ARTAN)
Solyc01g068480	P-loop containing nucleoside triphosphate hydrolases superfamily protein (AHRD V3.3 *** A0A2U1P5L6_ARTAN)
Solyc05g013690	GDSL esterase/lipase (AHRD V3.11 *** tr|A0A2R6REU1|A0A2R6REU1_ACTCH)
Solyc08g077420	Regulator of nonsense transcripts 1-like protein (AHRD V3.3 *** A0A2G3AF80_CAPAN)
Solyc09g063090	methyl-coenzyme M reductase II subunit gamma%2C putative (DUF3741) (AHRD V3.3 *-* AT5G43880.4)
Solyc07g056400	Serine/threonine-protein kinase WAG2 (AHRD V3.3 *** A0A2G2Z4Q4_CAPAN)
Solyc03g117970	Poly [ADP-ribose] polymerase (AHRD V3.3 *** A0A1U8F7L8_CAPAN)
Solyc04g014810	RING-type E3 ubiquitin transferase (AHRD V3.3 *-* A0A2I0XD88_9ASPA)
Solyc12g088880	NAD(P)-binding Rossmann-fold superfamily protein (AHRD V3.3 *** Q9SZB3_ARATH)
Solyc01g109600	BTB/POZ domain-containing protein (AHRD V3.3 *-* A0A2I0VL56_9ASPA)
Solyc01g007170	C2 calcium/lipid-binding plant phosphoribosyltransferase family protein (AHRD V3.3 *** A0A061F065_THECC)
Solyc02g070330	40S ribosomal protein S4 (AHRD V3.3 *** A0A2G2WHB8_CAPBA)
Solyc11g011880	cysteine-rich receptor-like protein kinase 2 (AHRD V3.3 *** A0A2I4FR69_9ROSI)
Solyc02g077850	Leucine-rich repeat receptor-like serine/threonine-protein kinase (AHRD V3.3 *** A0A0A7LUM7_ALBBR)
Solyc05g005150	F-box/Kelch repeat-containing F-box family protein (AHRD V3.3 *** C4PVT9_ARATH)
Solyc06g063370	Chlorophyll a-b binding protein
Solyc11g044910	Beta-D-xylosidase 4 (AHRD V3.3 *** A0A2G2VN32_CAPBA)
Solyc01g009990	Peptidyl-prolyl cis-trans isomerase (AHRD V3.3 *** A0A2G3DGA1_CAPCH)
Solyc02g021050	BTB/POZ domain protein%2C putative (DUF177) (AHRD V3.3 *** AT3G19810.2)
Solyc02g082470	Serine/threonine-protein kinase/endoribonuclease IRE1b (AHRD V3.3 *** A0A2G3D760_CAPCH)
Solyc03g093300	P-loop containing nucleoside triphosphate hydrolases superfamily protein (AHRD V3.3 *** Q9FII8_ARATH)
Solyc06g008340	Adaptin ear-binding coat-associated protein (AHRD V3.11 *** tr|A0A2K3NQR5|A0A2K3NQR5_TRIPR)
Solyc07g054850	transmembrane protein (AHRD V3.3 *** AT4G28100.1)
Solyc01g094720	Phosphate transporter (AHRD V3.3 *** A0A2H4H6T0_MALDO)
Solyc02g024010	transmembrane protein (AHRD V3.3 *** AT4G21740.1)
Solyc03g006100	LRR receptor-like serine/threonine-protein kinase EFR (AHRD V3.3 *** A0A1U8GGG3_CAPAN)
Solyc03g006860	fructokinase
Solyc02g070690	Calcium-dependent lipid-binding (CaLB domain) family protein (AHRD V3.3 *-* O22783_ARATH)
Solyc03g007070	1-aminocyclopropane-1-carboxylate synthase (AHRD V3.3 *** Q6U5H3_ROSHC)
Solyc01g007180	Spc97/Spc98 family of spindle pole body (SBP) component (AHRD V3.3 *** A0A2K3MUW2_TRIPR)
Solyc07g150103	early nodulin-like protein 1 (AHRD V3.3 *** A0A2I4F529_9ROSI)
Solyc11g010310	ATP-dependent RNA helicase DEAH11
Solyc06g035970	Tubulin beta chain (AHRD V3.3 *** A0A2G3C5Z8_CAPCH)
Solyc02g085350	Succinate dehydrogenase [ubiquinone] flavoprotein subunit
Solyc01g090480	RNA-binding KH domain-containing protein PEPPER-like (AHRD V3.11 *** tr|A0A2I4EJW1|A0A2I4EJW1_9ROSI)
Solyc02g032650	Disease resistance protein (TIR-NBS-LRR class) (AHRD V3.3 *** A0A2K3NUH8_TRIPR)
Solyc03g113620	Transcription factor MYB1R1 (AHRD V3.3 *** A0A2G2WRC4_CAPBA)
Solyc10g007590	Polyadenylate-binding protein-interacting protein 9 (AHRD V3.3 *** A0A2G3BCI2_CAPCH)
Solyc12g017410	Zinc finger transcription factor 76
Solyc03g116880	DNA-3-methyladenine glycosylase I (AHRD V3.3 *** A0A2I0X0X0_9ASPA)
Solyc06g060080	Mitochondrial ATP synthase subunit (AHRD V3.11 *** tr|A0A2K3NL61|A0A2K3NL61_TRIPR)
Solyc06g063300	F-box/kelch-repeat protein (AHRD V3.3 *-* A0A2G2WKX9_CAPBA)
Solyc07g005930	DNA-directed RNA polymerase (AHRD V3.3 *** A0A2G3BXA8_CAPCH)
Solyc03g007970	UDP-N-acetylmuramate--L-alanine ligase (AHRD V3.3 *** A8KZ98_FRASN)
Solyc04g072630	sporulation-specific protein (AHRD V3.3 *** AT1G22060.2)
Solyc06g053700	hypothetical protein (AHRD V3.3 *** AT1G04330.1)
Solyc10g085000	Protein kinase domain (AHRD V3.3 *** A0A200R4T5_9MAGN)
Solyc02g091890	myb-like protein X (AHRD V3.3 *-* A0A2I4FW88_9ROSI)
Solyc03g005430	MATH domain-containing protein (AHRD V3.11 *-* tr|A0A1Q3BTU7|A0A1Q3BTU7_CEPFO)
Solyc08g066730	N6-adenosine-methyltransferase MT-A70-like (AHRD V3.3 *** A0A2G3BS80_CAPCH)
Solyc01g022750	NADH dehydrogenase [ubiquinone] 1 alpha subcomplex subunit 6 (AHRD V3.3 *** A0A1U8GJI0_CAPAN)
Solyc02g091090	Valyl-tRNA synthetase (AHRD V3.11 *-* tr|A0A2I0WPG5|A0A2I0WPG5_9ASPA)
Solyc05g008780	Calponin-like domain protein (AHRD V3.3 *-* F4HWC3_ARATH)
Solyc02g092990	F-box protein (AHRD V3.3 *** A0A2G2XGV7_CAPBA)
Solyc03g059170	Calcium sensing receptor
Solyc04g025210	DUF668 domain-containing protein/DUF3475 domain-containing protein (AHRD V3.11 *** tr|A0A1Q3CI27|A0A1Q3CI27_CEPFO)
Solyc11g005150	entensin X55687
Solyc03g031980	Lectin-receptor kinase (AHRD V3.3 *** A0A2U1KV35_ARTAN)
Solyc10g006290	constitutive plastid-lipid associated protein
Solyc01g108330	transmembrane protein (AHRD V3.3 *-* AT2G26520.1)
Solyc06g048860	Laccase (AHRD V3.3 *** K4C5D2_SOLLC)
Solyc06g082980	Emopamil-binding (AHRD V3.3 *** A0A2U1L1I9_ARTAN)
Solyc09g011760	Mitochondrial import inner membrane translocase subunit TIM10 (AHRD V3.3 *** A0A2G2VX96_CAPBA)
Solyc02g030110	Vacuolar protein sorting-associated protein 54
Solyc04g005420	Carbohydrate-binding X8 domain superfamily protein (AHRD V3.3 *-* A0A1P8AZV6_ARATH)
Solyc11g069500	Auxin Response Factor 10A
Solyc12g042060	ATP-dependent Clp protease ATP-binding subunit ClpC (AHRD V3.3 *** A0A327YAA3_9BACI)
Solyc09g074380	DCD (Development and Cell Death) domain protein (AHRD V3.3 *-* F4IUS3_ARATH)
Solyc09g010870	Ribonuclease II/R (AHRD V3.3 *** A0A200R1B9_9MAGN)
Solyc12g055840	Glucan endo-1
Solyc01g096670	Cytochrome P450 (AHRD V3.11 *** tr|A0A2U1MC34|A0A2U1MC34_ARTAN)
Solyc01g005210	Trehalose-6-phosphate synthase (AHRD V3.3 *** E5GC29_CUCME)
Solyc05g018150	protein phosphatase 1 regulatory subunit pprA (AHRD V3.3 *** A0A2I4E5Y1_9ROSI)
Solyc10g054330	Zinc finger
Solyc10g004000	Dicer-like 1 protein (AHRD V3.3 *** H9N4C6_NICAT)
Solyc05g025510	WD repeat-containing protein 26-like (AHRD V3.3 *** A0A2I4E332_9ROSI)
Solyc10g084350	60S ribosomal protein L4 (AHRD V3.3 *** A0A2G2VZK1_CAPBA)
Solyc06g082220	Transcription initiation factor TFIID subunit 15b (AHRD V3.3 *-* A0A2G3CBW1_CAPCH)
Solyc10g012170	Calmodulin-binding receptor-like cytoplasmic kinase 2 (AHRD V3.3 *** A0A2G3BDH9_CAPCH)
Solyc07g047680	F-box protein SNE (AHRD V3.3 *** A0A2G3BZC0_CAPCH)
Solyc03g112990	Plant invertase/pectin methylesterase inhibitor superfamily protein
Solyc07g056140	ADP-glucose pyrophosphorylase small subunit
Solyc01g008190	INO80 complex subunit D-like (AHRD V3.11 *-* tr|A0A2K3PJC0|A0A2K3PJC0_TRIPR)
Solyc03g118090	Mitochondrial substrate carrier family protein (AHRD V3.3 *** F4KBU1_ARATH)
Solyc11g066630	Unknown protein
Solyc04g007420	RNAse P
Solyc06g050500	abscisic acid receptor PYL4-like (AHRD V3.3 *** A0A2I4EQL0_9ROSI)
Solyc02g090910	RNA-binding (RRM/RBD/RNP motifs) family protein (AHRD V3.3 *** A0A2U1NV59_ARTAN)
Solyc07g009160	ER membrane protein complex subunit 8/9-like protein (AHRD V3.3 *** A0A1U8HGZ8_CAPAN)
Solyc08g080290	Ethylene-responsive transcription factor (AHRD V3.11 *** tr|A0A2G2XKF3|A0A2G2XKF3_CAPBA)
Solyc06g060300	zinc-ribbon domain protein (AHRD V3.3 *** AT1G44414.1)
Solyc03g071570	Pectate lyase (AHRD V3.3 *** A0A2G2X594_CAPBA)
Solyc09g005320	RING/U-box superfamily protein (AHRD V3.3 *** Q0WS06_ARATH)
Solyc10g086650	Glyoxal oxidase (AHRD V3.3 *** A0A200R4V9_9MAGN)
Solyc09g011450	Proteasome inhibitor-related protein (AHRD V3.3 *** A0A2U1KX98_ARTAN)
Solyc09g055350	ABC transporter ATP-binding protein (AHRD V3.3 *** A0A1Y1IJM1_KLENI)
Solyc11g067090	Peptidyl-prolyl cis-trans isomerase (AHRD V3.3 *** A0A2I0V8M0_9ASPA)
Solyc02g082830	Phosphoserine aminotransferase (AHRD V3.3 *** A0A328DLJ5_9ASTE)
Solyc03g025720	Oxalate--CoA ligase (AHRD V3.3 *** A0A2G2X724_CAPBA)
Solyc08g067880	hypothetical protein (AHRD V3.3 *-* AT2G25670.2)
Solyc03g113340	Nodulin-like / Major Facilitator Superfamily protein (AHRD V3.3 *** A0A2U1M3G7_ARTAN)
Solyc04g076880	phosphoenolpyruvate carboxykinase
Solyc08g006970	Plant intracellular Ras-group-related LRR protein (AHRD V3.11 *** tr|A0A2R6PDI6|A0A2R6PDI6_ACTCH)
Solyc08g079250	Bifunctional inhibitor/lipid-transfer protein/seed storage 2S albumin superfamily protein (AHRD V3.3 *** A0A2U1L4X0_ARTAN)
Solyc12g015640	Mitochondrial transcription termination factor family protein (AHRD V3.3 *** A0A1P8B9X1_ARATH)
Solyc05g005020	Alpha-Glucan Water Dikinase
Solyc07g064400	Aminotransferase-like
Solyc09g074930	REF/SRPP-like protein (AHRD V3.3 *** A0A2G3CTD5_CAPCH)
Solyc07g053170	MAP kinase kinase kinase 56
Solyc06g083660	Methyl-coenzyme M reductase II subunit gamma
Solyc01g104560	protein-protein interaction regulator family protein (AHRD V3.3 *** AT1G15200.1)
Solyc03g120620	Homeobox-leucine zipper protein GLABRA 2 (AHRD V3.3 *** A0A2G3A3K0_CAPAN)
Solyc01g006010	Branchpoint-bridging protein (AHRD V3.3 *-* A0A1J3JYE2_NOCCA)
Solyc10g081660	sucrose phosphatase AF493563
Solyc02g078520	Mediator of rna polymerase ii transcription subunit 16 (AHRD V3.3 *** A0A1J6K1R5_NICAT)
Solyc04g071600	Abscisic acid stress ripening 5
Solyc12g094500	Alcohol dehydrogenase-like 7 (AHRD V3.3 *** A0A2G3B4K6_CAPCH)
Solyc06g068920	Protein kinase domain (AHRD V3.3 *** A0A200QLB1_9MAGN)
Solyc05g009710	Mediator of RNA polymerase II transcription subunit 25 (AHRD V3.3 *-* A0A2G3CLS9_CAPCH)
Solyc09g009190	1
Solyc06g051540	Protein kinase domain (AHRD V3.3 *** A0A200PWY1_9MAGN)
Solyc01g073710	Calcium-binding EF-hand family protein (AHRD V3.3 *** O64866_ARATH)
Solyc03g078610	Alpha-ketoglutarate-dependent dioxygenase alkB-like protein 2 (AHRD V3.3 *** A0A2G2X511_CAPBA)
Solyc08g077890	ATP-dependent Clp protease proteolytic subunit (AHRD V3.3 *** A0A2G2XM13_CAPBA)
Solyc10g081510	ethylene-responsive methionine synthase
Solyc10g083150	DWNN domain
Solyc03g096770	Protein RESPONSE TO LOW SULFUR 2 (AHRD V3.3 *-* LSU2_ARATH)
Solyc08g081490	Mitogen-activated protein kinase (AHRD V3.11 *** tr|A0A2G2XJK1|A0A2G2XJK1_CAPBA)
Solyc05g056030	Patatin (AHRD V3.3 *** A0A2G3CIZ2_CAPCH)
Solyc01g110110	Cysteine protease (AHRD V3.3 *** Q9AUC5_IPOBA)
Solyc11g012020	EH domain-containing protein 1 (AHRD V3.3 *** A0A1U8EYQ8_CAPAN)
Solyc07g053950	microtubule-associated protein (AHRD V3.3 *** AT4G28310.1)
Solyc02g080420	RNA-binding protein (AHRD V3.3 *** A0A2K3PBB6_TRIPR)
Solyc12g014320	Anaphase-promoting complex subunit 6 (AHRD V3.3 *** A0A2G2X2K1_CAPBA)
Solyc07g006160	AFG1-like ATPase family protein (AHRD V3.3 *** A0A2U1Q7V4_ARTAN)
Solyc08g077370	Purine permease (AHRD V3.3 *** A0A2P5BSS2_TREOI)
Solyc02g087340	Seed maturation-like protein (AHRD V3.3 *** Q8LGA2_ARATH)
Solyc03g119610	hypothetical protein (AHRD V3.3 *** AT1G13360.1)
Solyc04g005830	P-loop containing nucleoside triphosphate hydrolases superfamily protein (AHRD V3.3 *** A0A2U1KZ59_ARTAN)
Solyc02g089260	Auxin transport protein BIG (AHRD V3.3 *** A0A2G3D8Z1_CAPCH)
Solyc01g028860	Evolutionarily conserved C-terminal region 2 (AHRD V3.3 *** F4JDC2_ARATH)
Solyc03g007960	beta-carotene hydroxylase-2
Solyc05g005540	Polygalacturonase-1 non-catalytic subunit beta (AHRD V3.11 *** sp|Q40161|GP1_SOLLC)
Solyc06g072700	Heavy metal-associated isoprenylated plant protein (AHRD V3.3 *-* A0A2R6PUZ2_ACTCH)
Solyc07g049135	Fruit-specific protein (AHRD V3.3 *** FSPM_SOLLC)
Solyc07g064130	Polyubiquitin (AHRD V3.3 *** F1SY21_MESCR)
Solyc04g071610	Abscisic stress-ripening protein 3 (AHRD V3.11 *-* tr|A0A1U8GDP7|A0A1U8GDP7_CAPAN)
Solyc09g089580	2-oxoglutarate (2OG) and Fe(II)-dependent oxygenase superfamily protein (AHRD V3.3 *** A0A2U1QA13_ARTAN)
Solyc09g092380	S-adenosyl-l-homocysteine hydrolase
Solyc01g099190	lipoxygenase B
Solyc10g078540	H/ACA ribonucleoprotein complex subunit (AHRD V3.3 *-* A0A2G3BI53_CAPCH)
Solyc09g009260	fructose-1
Solyc04g064500	Protein phosphatase 2C (AHRD V3.11 *** tr|Q8S8Z0|Q8S8Z0_MESCR)
Solyc06g059740	Alcohol dehydrogenase (AHRD V3.3 *** A0A2U1MN94_ARTAN)
Solyc11g042930	SKP1-like protein (AHRD V3.3 *** O82463_NICCL)
Solyc03g111690	Pectate lyase (AHRD V3.3 *** A0A2G2ZW27_CAPAN)
Solyc02g092670	Subtilisin-like protease (AHRD V3.3 *** A9XG40_TOBAC)
Solyc05g009490	Unknown protein
Solyc04g076920	beta3-glucuronyltransferase
Solyc06g051800	expansin 1
Solyc12g010430	hypothetical protein (AHRD V3.3 --* AT5G35090.1)
Solyc04g007660	NHL domain-containing protein (AHRD V3.3 *** Q9ZNQ5_ARATH)
Solyc08g005170	Heat shock factor protein HSF8 (AHRD V3.3 *** HSF8_SOLPE)
Solyc03g114460	Acetyl-coenzyme A synthetase (AHRD V3.3 *** A0A2S4Q6W4_CITFR)
Solyc05g009200	hypothetical protein (DUF1639) (AHRD V3.3 *** AT1G68340.1)
Solyc09g082710	Histone H2A (AHRD V3.3 *** A0A1U8G3K0_CAPAN)
Solyc11g071660	NF-kappa-B-activating protein (AHRD V3.3 *-* A0A2G3BAH0_CAPCH)
Solyc05g005490	carbonic anhydrase
Solyc10g006130	EAR motif SlERF36
Solyc01g006000	GPI mannosyltransferase 2 (AHRD V3.3 *** A0A2G3DEG8_CAPCH)
Solyc01g103350	Cyclin-dependent kinase C-2 (AHRD V3.3 *** A0A2G2Y1M4_CAPAN)
Solyc11g010500	Mitochondrial uncoupling protein 6 (AHRD V3.3 *** A0A2G3B0B9_CAPCH)
Solyc07g007330	Serine-rich protein (AHRD V3.3 *** E5GCC5_CUCME)
Solyc08g076520	ribosome maturation factor (AHRD V3.3 *** AT2G35470.1)
Solyc03g095900	2-oxoglutarate (2OG) and Fe(II)-dependent oxygenase superfamily protein (AHRD V3.11 *** tr|A0A2U1L2L8|A0A2U1L2L8_ARTAN)
Solyc01g066440	hypothetical protein (AHRD V3.3 *** AT3G06840.1)
Solyc05g054070	60S ribosomal protein L6 (AHRD V3.11 *** tr|A0A2G3CJ48|A0A2G3CJ48_CAPCH)
Solyc06g034390	Protein EXORDIUM-like 7 (AHRD V3.3 *** A0A2G2X692_CAPBA)
Solyc03g116570	Thiol-disulfide oxidoreductase DCC family protein (AHRD V3.3 *** A0A2U1Z9Z9_PSEAV)
Solyc06g068390	Zinc finger protein 4 (AHRD V3.3 *** A0A2G3C958_CAPCH)
Solyc02g078030	VQ motif-containing protein 4 (AHRD V3.3 *** A0A2G2XER5_CAPBA)
Solyc11g013810	Nitrate reductase (AHRD V3.3 *** Q8LT13_SOLTU)
Solyc08g069050	Ubiquitin carboxyl-terminal hydrolase 19 (AHRD V3.3 *** A0A2G2XMP0_CAPBA)
Solyc06g061170	Mitochondrial carnitine/acylcarnitine carrier-like protein (AHRD V3.3 *** A0A2G2ZAG7_CAPAN)
Solyc05g011980	Unknown protein
Solyc01g098730	Unknown protein
Solyc07g007120	class II knotted-like homeodomain protein
Solyc10g079510	RAD3-like DNA-binding helicase protein (AHRD V3.3 *** A0A1P8AV25_ARATH)
Solyc01g058673	UBN2_3 domain-containing protein (AHRD V3.11 *-* tr|A0A1Q3C662|A0A1Q3C662_CEPFO)
Solyc03g097760	Sterile alpha motif domain (AHRD V3.3 *** A0A200R3W2_9MAGN)
Solyc03g114240	BURP domain (AHRD V3.11 *** tr|A0A200QH65|A0A200QH65_9MAGN)
Solyc05g010420	S-adenosylmethionine decarboxylase
Solyc01g111620	High-affinity nickel-transport family protein (AHRD V3.3 *** F4JM82_ARATH)
Solyc06g074170	NAC domain-containing protein 40 (AHRD V3.3 *** A0A2G2ZDN9_CAPAN)
Solyc03g005220	Histone H2A (AHRD V3.3 *** A0A1U8G3K0_CAPAN)
Solyc03g117480	Pyrophosphate-energized vacuolar membrane proton pump (AHRD V3.3 *** A0A1U8FVU1_CAPAN)
Solyc03g005730	3-isopropylmalate dehydratase large subunit (AHRD V3.3 *** A0A2G2WWL6_CAPBA)
Solyc07g064160	Thiamine thiazole synthase
Solyc02g085910	LOB domain-containing protein (AHRD V3.11 *** tr|A0A2U1NKN8|A0A2U1NKN8_ARTAN)
Solyc03g044000	60S ribosomal protein L26 (AHRD V3.3 *** A0A1U8FHZ3_CAPAN)
Solyc10g080710	asparaginyl-tRNA synthetase
Solyc06g070980	Ubiquitin-conjugating enzyme (AHRD V3.3 *** A0A200QF19_9MAGN)
Solyc07g056370	peroxisomal and mitochondrial division factor 2-like (AHRD V3.3 *-* A0A2I4EX70_9ROSI)
Solyc11g070140	Protein kinase p34cdc2 (AHRD V3.3 *** Q40789_PETCR)
Solyc04g077990	LOB domain-containing protein 37 (AHRD V3.3 *** A0A2G3CPS9_CAPCH)
Solyc04g078540	Cysteine proteinase RD21a (AHRD V3.11 *** tr|A0A2G3CPV2|A0A2G3CPV2_CAPCH)
Solyc09g008030	TCP transcription factor 19
Solyc04g010200	ABC transporter G family member (AHRD V3.3 *** A0A2K3PJ14_TRIPR)
Solyc03g113590	5-formyltetrahydrofolate cycloligase
Solyc06g075310	Adenylate kinase isoenzyme 6 homolog (AHRD V3.3 *** A0A2G3CAY7_CAPCH)
Solyc11g044800	PHP domain-containing protein (AHRD V3.3 *** A0A1Q3BVD1_CEPFO)
Solyc01g091030	Small auxin up-regulated RNA1
Solyc05g007560	60S ribosomal protein L34 (AHRD V3.3 *** A0A1U8HB42_CAPAN)
Solyc08g008370	DCD (Development and Cell Death) domain protein (AHRD V3.3 *-* A0A2U1P2J5_ARTAN)
Solyc12g099340	Calmodulin-binding transcription activator (AHRD V3.3 *** A0A1I9LRY7_ARATH)
Solyc02g084590	GATA transcription factor (AHRD V3.3 *** K4BAX4_SOLLC)
Solyc02g089780	dihydroflavonol 4-reductase/flavanone protein (AHRD V3.3 *-* AT3G02420.2)
Solyc07g053200	Adenine nucleotide alpha hydrolases-like superfamily protein (AHRD V3.11 *** tr|A0A2U1N8C2|A0A2U1N8C2_ARTAN)
Solyc02g083250	Cellular retinaldehyde-binding/triple function
Solyc11g067160	Aldo/keto reductase family oxidoreductase (AHRD V3.3 *** A0A2K3NWG7_TRIPR)
Solyc11g008090	shugoshin-1-like (AHRD V3.3 *** A0A2I4G173_9ROSI)
Solyc01g096040	Eukaryotic aspartyl protease family protein (AHRD V3.11 *** tr|A0A072U5I5|A0A072U5I5_MEDTR)
Solyc06g082030	2-oxoglutarate (2OG) and Fe(II)-dependent oxygenase superfamily protein (AHRD V3.3 *** Q9LUZ1_ARATH)
Solyc03g098340	Nucleoporin protein Ndc1-Nup (AHRD V3.3 *** A0A2U1Q2P5_ARTAN)
Solyc12g088810	S-adenosyl-L-methionine-dependent methyltransferase superfamily protein (AHRD V3.3 *-* F4I6D1_ARATH)
Solyc02g069910	Unknown protein
Solyc03g123570	1-phosphatidylinositol-3-phosphate 5-kinase FAB1B (AHRD V3.3 *** A0A2G2WPE3_CAPBA)
Solyc08g082250	endo-beta-1
Solyc07g053580	S-adenosyl-L-methionine-dependent methyltransferase superfamily protein (AHRD V3.3 *** B6UDN2_MAIZE)
Solyc09g082510	Kinase interacting (KIP1-like) family protein (AHRD V3.3 *** A0A2K3NUK8_TRIPR)
Solyc11g069430	plasma membrane intrinsic protein 2.6
Solyc05g008440	histidine-rich glycoprotein (AHRD V3.3 *** XP_004238870.1)
Solyc03g083910	Acid beta-fructofuranosidase (AHRD V3.11 *** sp|P29000|INVA_SOLLC)
Solyc04g008300	Protein kinase superfamily protein (AHRD V3.3 *** F4ID59_ARATH)
Solyc11g069380	GcpE
Solyc01g008110	Cytochrome P450 (AHRD V3.11 *** tr|A0A200R3Q9|A0A200R3Q9_9MAGN)
Solyc04g056330	AIG2-like (Avirulence induced gene) family protein (AHRD V3.3 *** Q9FIQ3_ARATH)
Solyc02g090980	MAP kinase kinase kinase 22
Solyc04g008550	Zinc finger transcription factor 31
Solyc02g085600	Scarecrow-like protein 15 (AHRD V3.3 *** A0A2G3AAH7_CAPAN)
Solyc09g075570	hypothetical protein (AHRD V3.3 *** AT3G62650.2)
Solyc11g072470	LOB domain-containing protein (AHRD V3.3 *** A0A2K3PP50_TRIPR)
Solyc03g051790	Nucleolar GAR2-like protein (AHRD V3.3 *** A0A2K3P267_TRIPR)
Solyc05g017890	THO complex subunit 2 (AHRD V3.3 *** A0A2G3ACB5_CAPAN)
Solyc05g051570	Rab family GTPase (AHRD V3.3 *** A0A1Y1IFP9_KLENI)
Solyc06g071270	RING/U-box superfamily protein (AHRD V3.3 *** A0A2U1LVQ0_ARTAN)
Solyc08g082080	Amino acid transporter (AHRD V3.3 *** A0A200PUP0_9MAGN)
Solyc10g009430	O-acyltransferase WSD1-like (AHRD V3.3 *** A0A2I4EG31_9ROSI)
Solyc11g045120	Translation initiation factor SUI1 (AHRD V3.3 *** A0A200QAE5_9MAGN)
Solyc12g010400	hypothetical protein (AHRD V3.3 *-* AT2G46490.1)
Solyc05g008450	Phenol hydroxylase reductase (AHRD V3.3 *** A0A200QUX1_9MAGN)
Solyc01g107980	RING-type E3 ubiquitin transferase (AHRD V3.3 *** A0A2G2W990_CAPBA)
Solyc01g099930	hypothetical protein (AHRD V3.3 *-* AT5G27860.2)
Solyc06g073850	hypothetical protein (AHRD V3.3 *** AT2G27180.1)
Solyc11g071970	Serine/threonine-protein kinase Nek5 (AHRD V3.3 *** A0A2G2YGZ2_CAPAN)
Solyc10g083360	Calmodulin-binding family protein
Solyc01g100260	Ppx/GppA phosphatase (AHRD V3.3 *** A0A200R285_9MAGN)
Solyc06g009800	Pentatricopeptide repeat-containing protein (AHRD V3.3 *** A0A2G3CFE3_CAPCH)
Solyc12g062160	tRNA (Pseudouridine(54)-N(1))-methyltransferase (AHRD V3.3 --* A0A2R6QR64_ACTCH)
Solyc04g082070	tRNA pseudouridine synthase family protein (AHRD V3.3 *-* E5GCD2_CUCME)
Solyc03g112880	fasciclin-like arabinogalactan protein 4 (AHRD V3.3 *** A0A1U7WCV8_NICSY)
Solyc02g063350	Calcium-dependent protein kinase (AHRD V3.3 *-* CDPK_DAUCA)
Solyc03g116230	Chitin-binding lectin 1 (AHRD V3.3 *-* LECT_SOLTU)
Solyc01g095320	Bag family molecular chaperone regulator 6-like protein (AHRD V3.3 *** A0A2K3PRI9_TRIPR)
Solyc03g031860	Phytoene synthase 1
Solyc03g111720	Peptide methionine sulfoxide reductase (AHRD V3.3 *** MSRA_SOLLC)
Solyc09g097780	Glycine-rich protein (AHRD V3.3 *-* A0A2G2ZTB9_CAPAN)
Solyc01g109350	Transducin family protein / WD-40 repeat family protein (AHRD V3.3 *** A0A2U1LM82_ARTAN)
Solyc01g111530	E3 ubiquitin-protein ligase UPL3 (AHRD V3.3 *** A0A1U8E9F6_CAPAN)
Solyc05g007150	UDP-galactose/UDP-glucose transporter 3 (AHRD V3.3 *** A0A2G2YDQ6_CAPAN)
Solyc02g031860	MAP kinase kinase kinase 12
Solyc08g081190	plasma membrane intrinsic protein 1.5
Solyc05g013700	Plant specific eukaryotic initiation factor 4B (AHRD V3.3 *** A0A1R3GQ54_COCAP)
Solyc06g076570	Class I heat shock protein (AHRD V3.3 *** A0A2K3M3P7_TRIPR)
Solyc03g118660	Down syndrome critical region protein 3-like protein (AHRD V3.3 *** A0A1J3H0S9_NOCCA)
Solyc11g008580	RBR-type E3 ubiquitin transferase (AHRD V3.3 *** A0A2G2VEE2_CAPBA)
Solyc07g042190	DUF581 domain-containing protein (AHRD V3.3 *** A0A1Q3C7K1_CEPFO)
Solyc04g054370	RING/U-box superfamily protein (AHRD V3.3 *-* Q3EAE6_ARATH)
Solyc01g103540	Evolutionarily conserved C-terminal region 2 (AHRD V3.3 *-* F4JDC2_ARATH)
Solyc12g070100	Mediator of RNA polymerase II transcription subunit 25 (AHRD V3.3 *** A0A2G3CLS9_CAPCH)
Solyc06g005290	UDP-galactose/UDP-glucose transporter 5B (AHRD V3.3 *** A0A1U8GXB7_CAPAN)
Solyc07g053980	Callose synthase 12 (AHRD V3.3 *** A0A1U8HBE5_CAPAN)
Solyc02g082810	Poly(A) polymerase I (AHRD V3.3 *** A0A1J3HIS1_NOCCA)
Solyc01g102580	endo-1
Solyc01g098920	Mitochondrial Rho GTPase (AHRD V3.3 *** A0A2G2XZV8_CAPAN)
Solyc01g095980	Acid phosphatase/vanadium-dependent haloperoxidase-related protein (AHRD V3.3 *** Q8RXV2_ARATH)
Solyc01g094950	Protein BPS1
Solyc09g065160	FZO-like protein (AHRD V3.3 *** AT1G03160.1)
Solyc09g064940	Phenazine biosynthesis PhzF protein (AHRD V3.3 *** A0A200Q4V2_9MAGN)
Solyc02g062500	2-oxoglutarate (2OG) and Fe(II)-dependent oxygenase superfamily protein (AHRD V3.3 *** A0A2U1LXD5_ARTAN)
Solyc06g074550	Unknown protein
Solyc06g050300	Non-specific serine/threonine protein kinase (AHRD V3.3 *** A0A2G2ZJA2_CAPAN)
Solyc04g076220	AT-hook motif nuclear-localized protein (AHRD V3.3 *** A0A1U8GD78_CAPAN)
Solyc01g099680	Rubber elongation factor (AHRD V3.3 *** A0A2U1LDB4_ARTAN)
Solyc06g076560	Class I heat shock protein (AHRD V3.3 *** A0A2K3M3P7_TRIPR)
Solyc03g119530	LOB domain-containing protein 41 (AHRD V3.3 *** A0A2G2WPK9_CAPBA)
Solyc04g006940	Phospholipid-transporting ATPase (AHRD V3.11 *** tr|A0A2G2ZHI8|A0A2G2ZHI8_CAPAN)
Solyc06g076050	Ankyrin repeat family protein
Solyc09g082140	Protein OBERON 1 (AHRD V3.3 *** A0A2I0V764_9ASPA)
Solyc09g074780	Protein indeterminate-domain 2 (AHRD V3.3 *** A0A1U8G2Y2_CAPAN)
Solyc09g082860	ATP sulfurylase (AHRD V3.3 *** Q8SAG1_SOYBN)
Solyc11g072250	hypothetical protein (AHRD V3.3 *-* AT1G21560.6)
Solyc07g007590	arogenate dehydrogenase 2
Solyc08g080780	Myosin heavy chain-related protein (AHRD V3.3 *** Q9C8T4_ARATH)
Solyc08g005630	Long-chain-alcohol oxidase (AHRD V3.3 *** R9R6I9_SOLLC)
Solyc02g077670	DnaJ-like protein (AHRD V3.3 *** Q9SP09_TOBAC)
Solyc02g020980	4-alpha-glucanotransferase (AHRD V3.3 *** Q6R608_SOLTU)
Solyc03g098240	glutamate decarboxylase
Solyc01g101010	RNA polymerase II subunit B1 CTD phosphatase RPAP2-like protein (AHRD V3.3 *-* AT5G26760.2)
Solyc02g063070	tft4
Solyc01g109970	SNF2 domain-containing protein / helicase domain-containing protein (AHRD V3.3 *** A0A178VR01_ARATH)
Solyc08g006480	flocculation protein Chr4
Solyc01g102690	Pentatricopeptide repeat-containing protein (AHRD V3.3 *** A0A2G2V0P1_CAPBA)
Solyc01g103530	Leucine-rich receptor-like protein kinase family protein
Solyc04g079320	Uroporphyrinogen-III synthase
Solyc05g054560	CASP-like protein (AHRD V3.3 *** A0A2G3CIG5_CAPCH)
Solyc12g010450	Protein phosphatase 2C (AHRD V3.3 *** B4FDN2_MAIZE)
Solyc09g082110	Late embryogenesis abundant protein D-34 (AHRD V3.11 *** tr|A0A2G2ZVC9|A0A2G2ZVC9_CAPAN)
Solyc07g045255	Unknown protein
Solyc12g062290	Protease Do-like 9 (AHRD V3.3 *** A0A2G2UZN1_CAPBA)
Solyc03g083560	Protein EXORDIUM-like 7 (AHRD V3.3 *** A0A2G2X692_CAPBA)
Solyc02g084770	Mitochondrial carrier protein
Solyc11g039650	Dynamin (AHRD V3.3 *** A0A2U1N3P9_ARTAN)
Solyc12g008580	Glucan endo-1
Solyc03g033560	Zinc finger (Ran-binding) family protein (AHRD V3.3 *** A0A2U1KRR8_ARTAN)
Solyc02g082670	WUSCHEL-related homeobox 13 (AHRD V3.3 *** A0A1U8FNS5_CAPAN)
Solyc08g082920	ORMDL-like protein (AHRD V3.3 *** A0A2U1LZK9_ARTAN)
Solyc12g005330	Ribosomal protein L2 (AHRD V3.3 *** A0A200QMJ3_9MAGN)
Solyc12g013690	Monooxygenase (AHRD V3.3 *** Q8H9C4_SOLTU)
Solyc02g031840	Potassium transporter (AHRD V3.3 *** A0A1U8FIL6_CAPAN)
Solyc05g055160	DnaJ protein (AHRD V3.3 *** Q43177_SOLTU)
Solyc05g015390	REF/SRPP-like protein (AHRD V3.3 *** A0A2G2VMR3_CAPBA)
Solyc01g112100	Flavin-containing monooxygenase (AHRD V3.3 *** A0A2G3BW83_CAPCH)
Solyc10g007310	Protein LIGHT-DEPENDENT SHORT HYPOCOTYLS 10 (AHRD V3.3 *** A0A2G3BCH5_CAPCH)
Solyc06g076520	Class I heat shock protein (AHRD V3.3 *** A0A2K3M3P7_TRIPR)
Solyc01g086960	Zinc finger A20 and AN1 domain stress-associated protein (AHRD V3.3 *** A0A2K3LXD0_TRIPR)
Solyc01g034150	DNA polymerase eta (AHRD V3.11 *** tr|A0A2G3AIQ2|A0A2G3AIQ2_CAPAN)
Solyc03g123770	Unknown protein
Solyc09g009390	Monodehydroascorbate reductase (AHRD V3.3 *** A0A2G2VWV8_CAPBA)
Solyc03g116590	Embryo-specific protein (AHRD V3.3 *** A0A2K3LFD9_TRIPR)
Solyc08g062340	17.9 kDa class II heat shock protein (AHRD V3.3 *** A0A2G3A1B9_CAPAN)
Solyc03g098590	RING/U-box superfamily protein (AHRD V3.3 *** A0A1I9LQQ9_ARATH)
Solyc12g007110	Proline-rich receptor-like protein kinase PERK1 (AHRD V3.3 *** A0A2G3AUM1_CAPCH)
Solyc01g009430	hypothetical protein (AHRD V3.3 *** AT2G27830.1)
Solyc03g062650	thyroid adenoma-associated protein homolog (AHRD V3.3 *** A0A2I4H3K5_9ROSI)
Solyc08g062920	elongation factor 2
Solyc11g006460	DnaJ protein (AHRD V3.3 *** Q43177_SOLTU)
Solyc01g090720	P53/DNA damage-regulated protein (AHRD V3.3 *** AT3G15351.5)
Solyc09g008200	heavy metal-associated isoprenylated plant protein 3-like (AHRD V3.3 *-* A0A1S4B4L4_TOBAC)
Solyc11g011210	Gibberellin-regulated protein 12 (AHRD V3.3 *** A0A1U8GMV5_CAPAN)
Solyc12g056590	Ethylene Response Factor D.2
Solyc04g011440	ethylene-responsive heat shock protein cognate 70
Solyc01g010750	Ricin B lectin domain (AHRD V3.3 *-* A0A200Q0G6_9MAGN)
Solyc02g067560	Inactive receptor kinase (AHRD V3.3 *** A0A2R6P9E5_ACTCH)
Solyc03g120230	MAR-binding filament-like protein 1 (AHRD V3.3 *** MFP1_SOLLC)
Solyc08g007490	Class I peptide chain release factor (AHRD V3.3 *** AT1G62850.3)
Solyc08g077350	Haloacid dehalogenase-like hydrolase (HAD) superfamily protein (AHRD V3.3 *** A0A2U1KV95_ARTAN)
Solyc02g091780	Kinesin-like protein (AHRD V3.3 *** A0A2G3AAZ8_CAPAN)
Solyc05g008580	CDP-diacylglycerol--serine O-phosphatidyltransferase 1 (AHRD V3.3 *** A0A1U8EJL5_CAPAN)
Solyc06g005590	Telomere repeat-binding protein 4 (AHRD V3.3 *-* A0A2G3C540_CAPCH)
Solyc06g007320	Ubiquitin activating enzyme E1 (AHRD V3.3 *** G1FER0_CAMSI)
Solyc10g083990	D-tagatose-1%2C6-bisphosphate aldolase subunit (AHRD V3.3 *** AT2G36895.1)
Solyc03g082580	6-phosphogluconolactonase (AHRD V3.3 *** B6UAK0_MAIZE)
Solyc07g064690	50S ribosomal protein L34 (AHRD V3.3 *** AT1G29040.1)
Solyc03g026020	Heat shock transcription factor (AHRD V3.3 *** E1U3C8_CICAR)
Solyc06g073320	GDP-L-galactose phosphorylase 1 (AHRD V3.3 *** A0A1U8HAC0_CAPAN)
