# Supplementary material for: Ethylene Response Factor SlERF.D6 promotes ripening initiation and ethylene response through downstream transcription factors SlDEAR2 and SlTCP12
Source: Research Square preprint supplement (doi:10.21203/rs.3.rs-4018812/v1), 2024-03-25
Supplement: Supplementary file 16 [file Dataset_S8.xlsx]

## Sheet: Sheet1
CIRSPR Constructs
CR-ARR11	SlARR11-gR	TCAAGCGAACCAGTAGGCTTGGTTGGAAAGATTTCCCAAAGTTTTAGAGCTAGAAATAGC
CR-BLH1	SlBLH1-gR1	TCAAGCGAACCAGTAGGCTTGACCAATGAGCTAAGTACCGGTTTTAGAGCTAGAAATAGC
	SlBLH1-gR2	TCAAGCGAACCAGTAGGCTTGTTGGACCAGCAGAGAAAGAGTTTTAGAGCTAGAAATAGC
CR-bZIP8	SlbZIP8-gR1	TCAAGCGAACCAGTAGGCTTGCTGGCAGACGGAGCCCCCGGTTTTAGAGCTAGAAATAGC
	SlbZIP8-gR2	TCAAGCGAACCAGTAGGCTTGGAAGGTGTATGGACTGCGGGTTTTAGAGCTAGAAATAGC
CR-ERF.D6	SlERF.D6-gR1	TCAAGCGAACCAGTAGGCTTGGATATGTCGGCAATGGTGAGTTTTAGAGCTAGAAATAGC
	SlERF.D6-gR2	TCAAGCGAACCAGTAGGCTTGGTCGGAGAGAGGCAGAGTGGTTTTAGAGCTAGAAATAGC
CR-HZL2	SlHZL2-gR1	TCAAGCGAACCAGTAGGCTTGATAGTTTAGGAGAAGTGGAGTTTTAGAGCTAGAAATAGC
	SlHZL2-gR2	TCAAGCGAACCAGTAGGCTTGCATGATTTCTGGTAGTAGAGTTTTAGAGCTAGAAATAGC
CR-JA2	SlJA2-gR1	TCAAGCGAACCAGTAGGCTTGTGCAATTAAGTTTACCACCGTTTTAGAGCTAGAAATAGC
	SlJA2-gR2	TCAAGCGAACCAGTAGGCTTGTTTCACCAATAATTTGTAGGTTTTAGAGCTAGAAATAGC
CR-MYC6	SlMYC6-gR1	TCAAGCGAACCAGTAGGCTTGTACTTGTCTCGATCCCCTGGTTTTAGAGCTAGAAATAGC
	SlMYC6-gR2	TCAAGCGAACCAGTAGGCTTGCTGCTGGATATCCTAACCAGTTTTAGAGCTAGAAATAGC
CR-NAC39	SlNAC-gR1	TCAAGCGAACCAGTAGGCTTGTTCGGGGATAATTGAGACAGTTTTAGAGCTAGAAATAGC
	SlNAC-gR2	TCAAGCGAACCAGTAGGCTTGAGAATTTGGAGACAATGAGGTTTTAGAGCTAGAAATAGC
CR-VAH1	SlVAH1-gR1	TCAAGCGAACCAGTAGGCTTGTTCATCTACTGCACCGAAAGTTTTAGAGCTAGAAATAGC
	SlVAH1-gR2	TCAAGCGAACCAGTAGGCTTGCGAAGCTATGATGGCTCCAGTTTTAGAGCTAGAAATAGC
CR-WOX14	SlWOX14-gR1	TCAAGCGAACCAGTAGGCTTGATGTTTGTGAAAGTGATGAGTTTTAGAGCTAGAAATAGC
	SlWOX14-gR2	TCAAGCGAACCAGTAGGCTTGAGACGGCGGAGGAATTGAAGTTTTAGAGCTAGAAATAGC
CR-HsFA6b	SlyHSF-gR1	TCAAGCGAACCAGTAGGCTTGTCTCATGAAGACACTCCTTGTTTTAGAGCTAGAAATAGC
	SlyHSF-gR2	TCAAGCGAACCAGTAGGCTTGTGGATATATGAGAAAAGATGTTTTAGAGCTAGAAATAGC
CR-ZHD23	SlZHD23-gR	TCAAGCGAACCAGTAGGCTTGTAAAGTACCAGGATTTCCAGTTTTAGAGCTAGAAATAGC
CR-DEAR2	SlDEAR2-gR1	TCAAGCGAACCAGTAGGCTTGCCTCGCAAGTAAAATACAGGTTTTAGAGCTAGAAATAGC
	SlDEAR2-gR2	TCAAGCGAACCAGTAGGCTTGAGGAGAGAAGAGAAAACAGGTTTTAGAGCTAGAAATAGC
CR-TCP12	SlTCP12-gR1	TCAAGCGAACCAGTAGGCTTGCTGGGTCCAACCATCCCCAGTTTTAGAGCTAGAAATAGC
	SlTCP12-gR2	TCAAGCGAACCAGTAGGCTTGGTGAGTTGAAAAACCCTGGGTTTTAGAGCTAGAAATAGC
Genotyping Primers
CR-ARR11	Forward	AGCATAAATCGGAAACAACCTC
	Reverse	GTATCTCTGCAGCACACCA
CR-BLH1	Forward	CAGAGCATTTGTAGTGTTCCTTTG
	Reverse	ACCATTTTGGAGAATCTGACATGA
CR-bZIP8	Forward	CGAAGTCGGCAACTATGG
	Reverse	GGGGTTCCATACCATACCC
CR-ERF.D6	Forward	GGTGGCGAATCAAGGAGA
	Reverse	CCATAACCCCTTTGAGCTTG
CR-HZL2	Forward	TGCCTGGGTTGCAATCC
	Reverse	TGTCCCCCTCCCTTCC
CR-JA2	Forward	ATGGGTGTTCAAGAAAAAGATCC
	Reverse	CCTCCCTCATTCAAAATTCCAATAC
CR-MYC6	Forward	GGAGCTAGTTGATCAATAGTTTGC
	Reverse	CTTCGCTCAAAATTCACAGCA
CR-NAC39	Forward	AGCTCTGATCTTCCTCCTGG
	Reverse	CTTACCCTCATAGATCCACTTTGC
CR-VAH1	Forward	CGCCACAAGCTATAGATCTTTACT
	Reverse	CAACTATCTCAGGCCAATCAAC
CR-WOX14	Forward	ACTGTTGATGAGTAGTAGTAGTCAGT
	Reverse	GGCCCAATTAGATATCAAGACCA
CR-HsFA6b	Forward	AGTTCTCATTACTCTCTTGCTAATATACC
	Reverse	GCTGCCTGACAAAGCTTG
CR-ZHD23	Forward	ATGGTTTCGAATCACAATCATCAC
	Reverse	TTTTACACCTAGCGGCGC
CR-DEAR2	Forward	CACCACCCACCCTGGG
	Reverse	TGCAGAGCATCAACTCGAG
CR-TCP12	Forward	ATGGAATTCATGGAACCACATAGA
	Reverse	CGGAGCTGAAATTGTTGTACC
Overexpression Construct
SlERF.D6-OE	Forward	GATGACGATGACAAGGAATTC ATGTGCATATTAAAGGTGGCG
	Reverse	GTCCTTGTAATCCATGAATTC TTAGCTAGAAGAAGGTGGATAGTG
NPT II	Forward	ATGGCAATTACCTTATCCGCA
	Reverse	AGATCATCCTGATCGACAAGAC
qPCR_ERF.D6	Forward	TATAATCAACCTCCGCGTCAA
	Reverse	ACTCGCAATTACTTCAAAATCCAATAG
qPCR_Actin	Forward	TGTCCCTATTTACGAGGGTTATGC
	Reverse	CAGTTAAATCACGACCAGCAAGAT
DAP-Seq Construct
HALO-SlERF.D6	Forward	GGGGACAAGTTTGTACAAAAAAGCAGGCTTCATGTGCATATTAAAGGTGGCG
	Reverse	GGGGACCACTTTGTACAAGAAAGCTGGGTTTTAGCTAGAAGAAGGTGGATAGTG
