# Supplementary material for: Ethylene Response Factor SlERF.D6 promotes ripening initiation and ethylene response through downstream transcription factors SlDEAR2 and SlTCP12
Source: Research Square preprint supplement (doi:10.21203/rs.3.rs-4018812/v1), 2024-03-25
Supplement: Supplementary file 19 [file Dataset_S9.xlsx]

## Sheet: Sheet1
Solyc ID	Name
Solyc05g012020	RIN
Solyc10g006880	NOR
Solyc02g077920	CNR
Solyc10g083630	DML2
Solyc06g069430	FUL1
Solyc03g114830	FUL2
Solyc02g071730	TAG1
Solyc07g055920	TAGL1
Solyc06g064840	MBP3
Solyc03g118290	ARF2a
Solyc07g052960	GRAS38
Solyc11g072470	LOB1
Solyc01g067890	DXS
Solyc03g114340	DXR
Solyc04g079960	GGPPS2
Solyc02g085700	GGPPS3
Solyc03g031860	PSY1
Solyc02g081330	PSY2
Solyc03g123760	PDS1
Solyc12g098710	ZISO
Solyc01g097810	ZDS
Solyc10g081650	CRTISO
Solyc04g040190	LCYB1
Solyc10g079480	LCYB2
Solyc06g074240	CYCB
Solyc12g008980	LCYE
Solyc06g036260	CrtR-B1
Solyc03g007960	CrtR-B2
Solyc02g090890	ZEP
Solyc04g050930	VDE
Solyc10g080210	PG2a
Solyc03g111690	PL
Solyc06g051800	Exp1
Solyc02g088100	Exp5
Solyc09g010210	Cel2
Solyc12g008840	TBG4
Solyc01g101060	SAM1
Solyc12g099000	SAM2
Solyc09g008280	SAM3
Solyc01g095080	SlACS2
Solyc05g050010	SlACS4
Solyc07g049530	SlACO1
Solyc12g005940	SlACO2
Solyc07g049550	SlACO3
Solyc02g081190	SlACO4
Solyc07g026650	SlACO5
Solyc09g075440	SlETR3
Solyc06g053710	SlETR4
Solyc10g083610	SlCTR1
Solyc01g097980	SlCTR2
Solyc09g009090	SlCTR3
Solyc09g007870	SlEIN2
Solyc06g073720	SlEIL1
Solyc01g009170	SlEIL2
Solyc01g096810	SlEIL3
Solyc06g073730	SlEIL4
Solyc08g060810	EBF1
Solyc12g009560	EBF2
Solyc07g008250	EBF3
Solyc07g006180	SlTPR1
Solyc01g104340	GR
Solyc08g065320	GRL1
Solyc02g062420	GRL2
Solyc03g111720	E4
Solyc09g089580	E8
Solyc03g095900	E8-HOMOLOG
Solyc03g093610	ERF.A2
Solyc05g052050	ERF.A3 / SlPit4
Solyc05g052030	ERF.B3
Solyc11g011750	ERF.C8
Solyc12g056590	ERF.D2
Solyc09g075420	ERF.E1
Solyc06g063070	ERF.E2
Solyc03g123500	ERF.E3
Solyc06g082590	ERF.G2
Solyc02g093150	AP2c
Solyc11g010710	AP2-like
Solyc05g009790	AP2-RAV
Solyc11g020670	SlTCP12
Solyc04g078640	SlDEAR2
Solyc09g090070	PT1
Solyc06g065820	LeERF1
Solyc01g065980	SlERF6
Solyc02g077840	SlERF.F12
Solyc03g118190	SlERF.D7
Solyc03g005760	CAB1
Solyc06g063370	CAB2
Solyc06g054260	PsaD
Solyc07g066310	PsbR
Solyc04g017690	ERD15
Solyc09g082460	HSMT
Solyc01g088090	PPH
Solyc02g070490	AHL
Solyc03g115220	F3’H
Solyc04g015750	ChlH
Solyc04g072039	HPRT
Solyc06g074710	HCT
Solyc07g054210	POR2
Solyc08g005760	AAT2
Solyc08g005770	AAT1
Solyc08g074682	PPO
Solyc08g080090	GF
Solyc09g082460	HSM
Solyc09g091510	CHS1
Solyc10g081650	CRTISO
Solyc11g013110	FLS1
