# Supplementary material for: Ethylene Response Factor SlERF.D6 promotes ripening initiation and ethylene response through downstream transcription factors SlDEAR2 and SlTCP12
Source: Research Square preprint supplement (doi:10.21203/rs.3.rs-4018812/v1), 2024-03-25
Supplement: Supplementary file 22 [file a1626dc98ca33ad32bf567c7.docx]

**Supporting Information for**

**Ethylene Response Factor SlERF.D6 promotes ripening initiation and ethylene response by regulating downstream transcription factors *SlDEAR2* and *SlTCP12***

Yao Chena,b, Xin Wanga, Vincent Colantonioc,d, Tara Fishd, Jie Yee, Theodore Thannhauserd, Zhibiao Yee, Mingchun Liub, Yongsheng Liub, Zhangjun Feia,d, James J. Giovannonia,c,d *

a Boyce Thompson Institute for Plant Research, Cornell University, Ithaca, NY 14853; b Key Laboratory of Bio-Resource and Eco-Environment of Ministry of Education, College of Life Sciences, Sichuan University, Chengdu, 610065, Sichuan, P.R. China. c Plant Biology Section, School of Integrative Plant Science, Cornell University, Ithaca, NY 14853; d US Department of Agriculture–Agricultural Research Service Robert W. Holley Center for Agriculture and Health, Ithaca, NY 14853; e The Key Laboratory of Horticultural Plant Biology, Ministry of Education, Huazhong Agricultural University, Wuhan, China.

**Corresponding author:** James J. Giovannoni

**Email:**  jjg33@cornell.edu

**This PDF file includes:**

Supporting text

Figures S1 to S20

Legends for Datasets S1 to S9

SI References

**Other supporting materials for this manuscript include the following:**

Datasets S1 to S9

**Generation of gene-edited and over-expression tomato plants**

20-nt gRNAs specific for *SlBLH1, SlMYC6, SlbZIP8, SlWOX14, SlHZL2, SlVAH1,*

*SlERF.D6, SlNAC39, SlHsfA6b, SlARR11, SlZHD23, SlJA2, SlDEAR2,* and *SlTCP12* were designed using the online website CRISPR-P (version 2.0, <http://crispr.hzau.edu.cn/CRISPR2>) (1). gRNA cassettes were cloned into binary vector p201N:Cas9 by Gibson assembly as described (2). Clones containing gRNA sequences were confirmed by PCR and Sanger sequencing at the Cornell University Genomics Core Facility. Resulting constructs were transformed into *S. lycopersicum* cv Ailsa Craig by *Agrobacterium tumafaciens* (strain LBA-4404). Tomato transformation was performed at the plant transformation facility of Boyce Thompson Institute using described methods (3). Tomato genome mutations were verified by sequencing genomic regions flanking the target sites. For the overexpression construct, a full length of *SlERF.D6* CDS was amplified and cloned into a pHELLSGATE8 vector followed by *Agrobacterium*-mediated transformation. All primers used for generating these constructs and genotyping are included in the Dataset 8.

**Ethylene, firmness, and carotenoid measurements**

Fruit ethylene production was measured from accumulated headspace gas from WT and mutant fruits held in closed containers and using a gas chromatograph (Agilent 6850 GC System) as previously described (4). Firmness was assessed using an Instron Material Test Model: 3342 with 1 mm penetration (5). Comprehension was measured using the same instrument fitted with a 50 mm wide P50 DIA compression plate and a single measurement on each fruit using the maximum compressive load calculation. For carotenoid analysis, approximately 100 mg frozen ground tissue was lyophilized overnight (LABFREEZ®, FD-10-MTP). Prior to extraction, 100 μL of 0.3g/mL MgCO3 was added to each sample to neutralize acids. Carotenoids were extracted under low light using 500 μL of ethyl acetate. Extracts (250 μL) were dried at reduced pressure and re-dissolved in ethyl acetate containing 50 μg/ml of diindolylmethane as an internal standard. Carotenoids were separated and quantified using an ultra-performance convergence chromatography (UPC2) system and a 2.1 × 150 mm HSS C18 SB column packed with 1.8 μm diameter particles (Waters, Milford, MA). The column effluent was monitored between 250 and 700 nM. The automatic back pressure regulator (ABPR) was set to 3,750 PSI and the flow rate was 1 mL/min. The column was equilibrated at 99% eluent A (supercritical CO2) and 1% eluent B (Methanol). The chromatogram was developed using a concave, non-linear gradient (Waters gradient curve 10) to 20% B over 7.5 min. The eluent concentration was held at 20% B for 4.5 min followed by an instantaneous step back to 1% B and a 3-minute re-equilibration. Individual carotenoids were identified by comparison with authentic standards (Sigma). β-carotene was used to construct a five-point calibration curve (5–100 ng μL-1) and the relative concentrations of each carotenoid are reported in β-carotene equivalents, and the chlorophyll compounds were quantified against a calibration of the respective chlorophyll standard (a or b), using the TargetLynx software in MassLynx 4.1 (Waters). For ethylene and firmness measurements, for each stage, at least six fruits were used. For carotenoids measurements, at least three biological replicates were performed.

**Ethylene treatment and triple response assay**

Fruits were harvested and left on bench untouched for 4 hours to allow for dissipation of wound ethylene. Treatments were performed for 16 hours in 250 ml sealed jars fitted with an injection port allowing introduction of ethylene to a final concentration of 20 ppm. For triple response assessment, seeds of WT and mutants were sterilized with 50% bleach (15 mins) and rinsed with sterile water (5 times) and placed on water agar (3%) in Magenta boxes supplemented with or without 10 µM ACC, and then transferred to 25°C for germination in the dark for 7 days. The seedling triple response was scored by assessing hypocotyl and root length. For each line, at least 15 seedlings were measured.

**RNA-seq library construction and RT-qPCR**

RNA was extracted from frozen ground pericarp and locular material as previously described (7). Strand-specific RNA-seq libraries were made as previously described (8), and libraries were pooled and sequenced (paired end) using either a NextSeq500 instrument (Illumina) at the Cornell Biotechnology Core Facility or HiSeq X (Illumina) at Psomagen, Inc. (MD 20850, USA). For RT-PCR, cDNA was synthesized from 2 μg of total RNA using a SuperScrip IV RT reagent Kit with gDNA Eraser (ThermoFisher). cDNA products were diluted to 2.5 ng μl–1 and used as templates for RT–qPCR which was performed using an ABI Prism 7900HT Sequence Detection System according to manufacturer’s instructions (PowerTrack™ SYBR Green Master Mix for qPCR).

**RNA-seq data processing and analysis**

Raw RNA-seq reads were processed as previously described to remove adapter, low-quality and rRNA sequences (4). Cleaned reads were aligned to the Heinz genome reference SL4.0 (9) with ITAG4.0 gene models (https://solgenomics.net/organism/Solanum_lycopersicum/genome) using HiSAT2 (10). For each gene model, raw counts were normalized to generate RPKM (reads per kilobase transcripts per million mapped reads) values and used to identify differentially expressed genes (adjusted P < 0.05, ratio ≥ 2 or ≤ 0.5) using the DESeq2 package (11). PCA plots were generated also using the DESeq2 package. Significant overlap between groups of differentially expressed genes was assessed using the online website tool (<http://bioinformatics.psb.ugent.be/webtools/Venn/>). GO term enrichment analysis for DEGs was performed using the Fisher’s exact test in the Blast2GO (12) suite with a cutoff of adjusted P-value < 0.05.

**DNA affinity purification sequencing (DAP-Seq) analysis**

For DAP-Seq, the *SlERF.D6* CDS was isolated from fruit RNA by RT-PCR and joined to Gateway cloning sites by PCR with primers (Dataset D8). The resulting product was cloned into pDONR207 and transferred into pIX-HALO by Gateway recombination according to the manufacturer's protocol (Invitrogen). Expression of Halo-ERF.D6 fusion and enrichment of DNA targets were performed as described previously (13, 14). DNA library preparations were performed following the manufacturer's protocol (Illumina) and sequenced on a NextSeq500 as 2 × 75 nt paired-end reads.

**
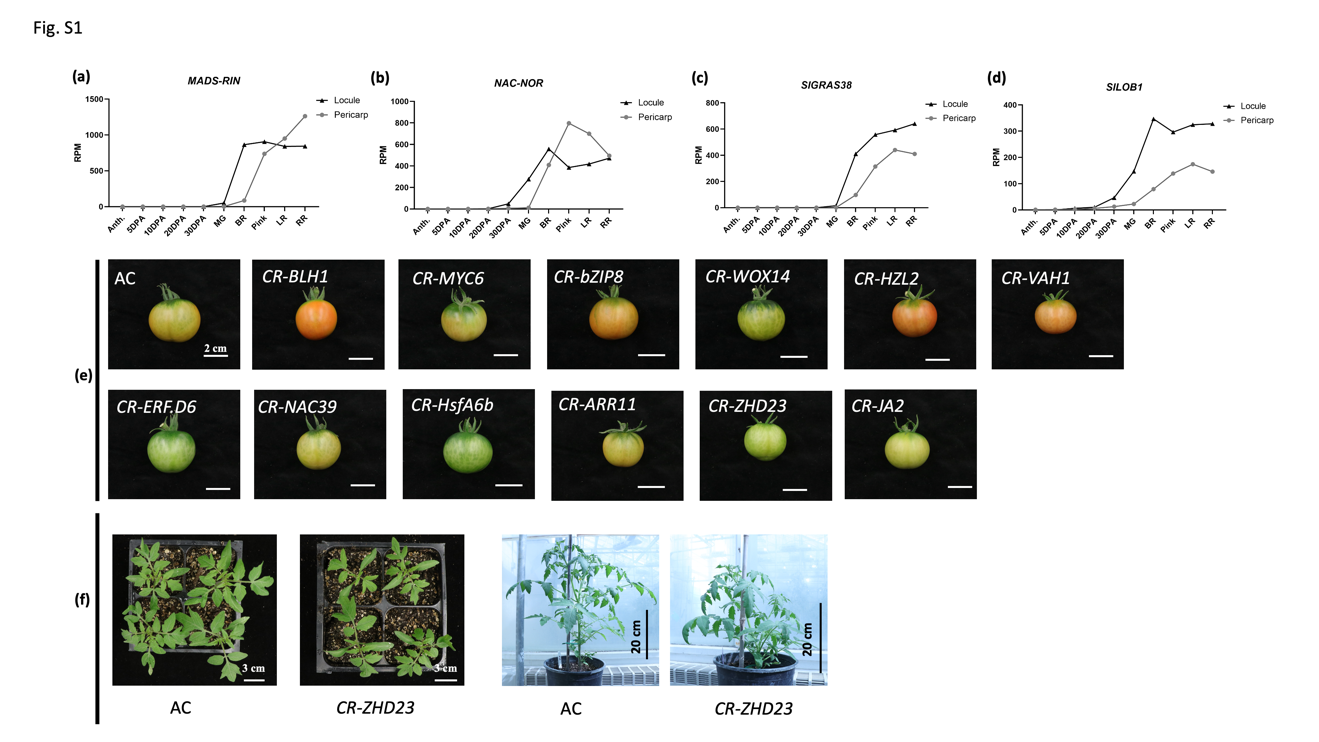
**

**Fig. S1 Gene expression patterns and phenotypes of gene-edited mutants**

Expression levels of ripening traits related TFs: **(a)** *MADS-RIN,* (**b)** *NAC-NOR,* **(c)** *SlGRAS38, and* **(d)** *SlLOB1* at the indicated developmental stages. **(e)** Fruit phenotypes of *Ailsa Craig* (AC), and lines edited for the 12 indicated TFs at 35DPA. *CR-BLH1*, Solyc01g007070; *CR-MYC6*, Solyc01g102300; *CR-bZIP8*, Solyc01g102300; *CR-WOX14*, Solyc02g082670; *CR-HZL2*, Solyc02g087840; *CR-VAH1*, Solyc03g113270; *CR-ERF.D6*, Solyc04g071770; *CR-NAC39*, Solyc05g007770; *CR-HsfA6b*, Solyc06g053960; *CR-ARR11*, Solyc08g077230; *CR-ZHD23*, Solyc09g065670; *CR-JA2*, Solyc12g013620. **(f)** Plant phenotypes of wild-type and CR-ZHD23 mutants. Seeds were sown and germinated on the same day.


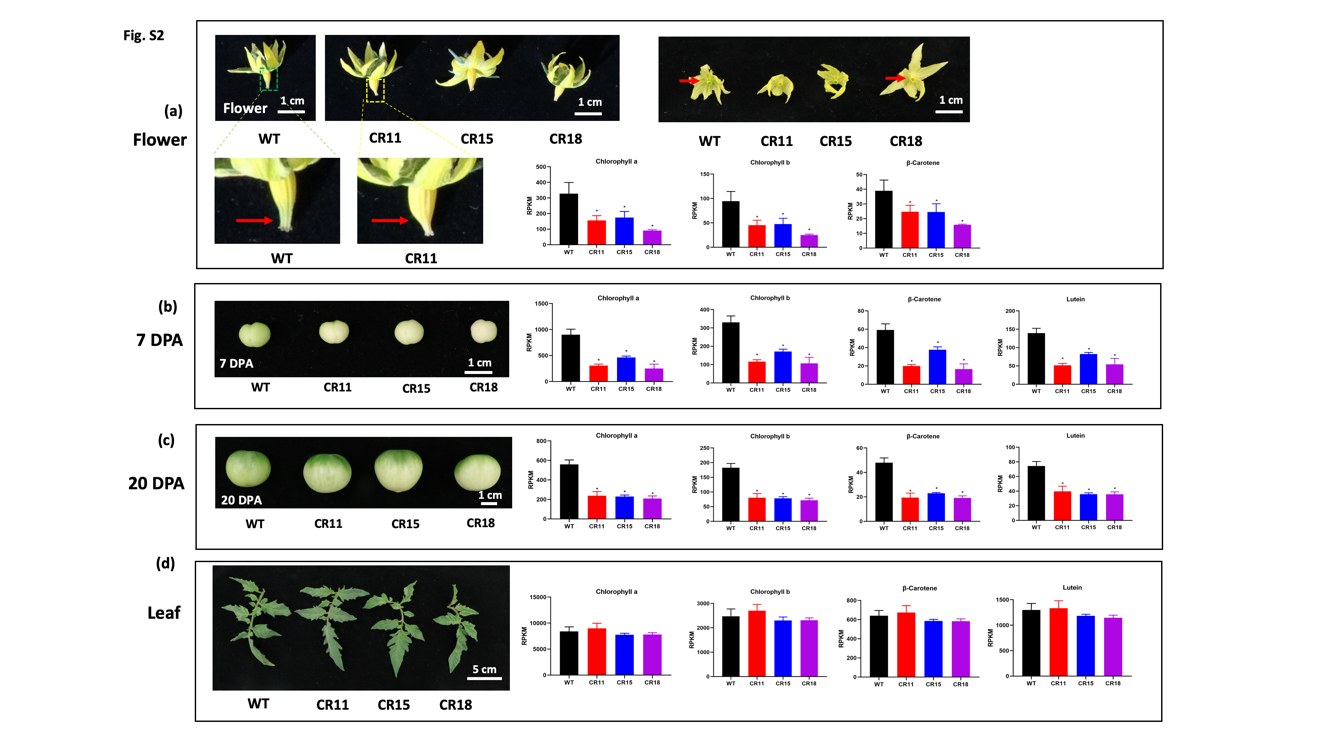


**Fig. S2 Phenotypes of *SlARR11* gene-edited mutants.** **(a)** Flowers of WT and *SlARR11* mutant lines *CR11*, *CR15* and *CR18*. Arrows point to the locations where mutants showing less green color compared to WT. Carotenoid levels are shown graphically. Lutein is not shown for flowers as no detectable lutein was measured in any of the four genotypes. All carotenoid measurements were from flowers where the sepals were removed **(b)** 7 DPA fruit, **(c)** 20 DPA fruit and **(d)** leaves are also shown along with carotenoid levels. Error bars indicate ± SE (n ≥ 3).


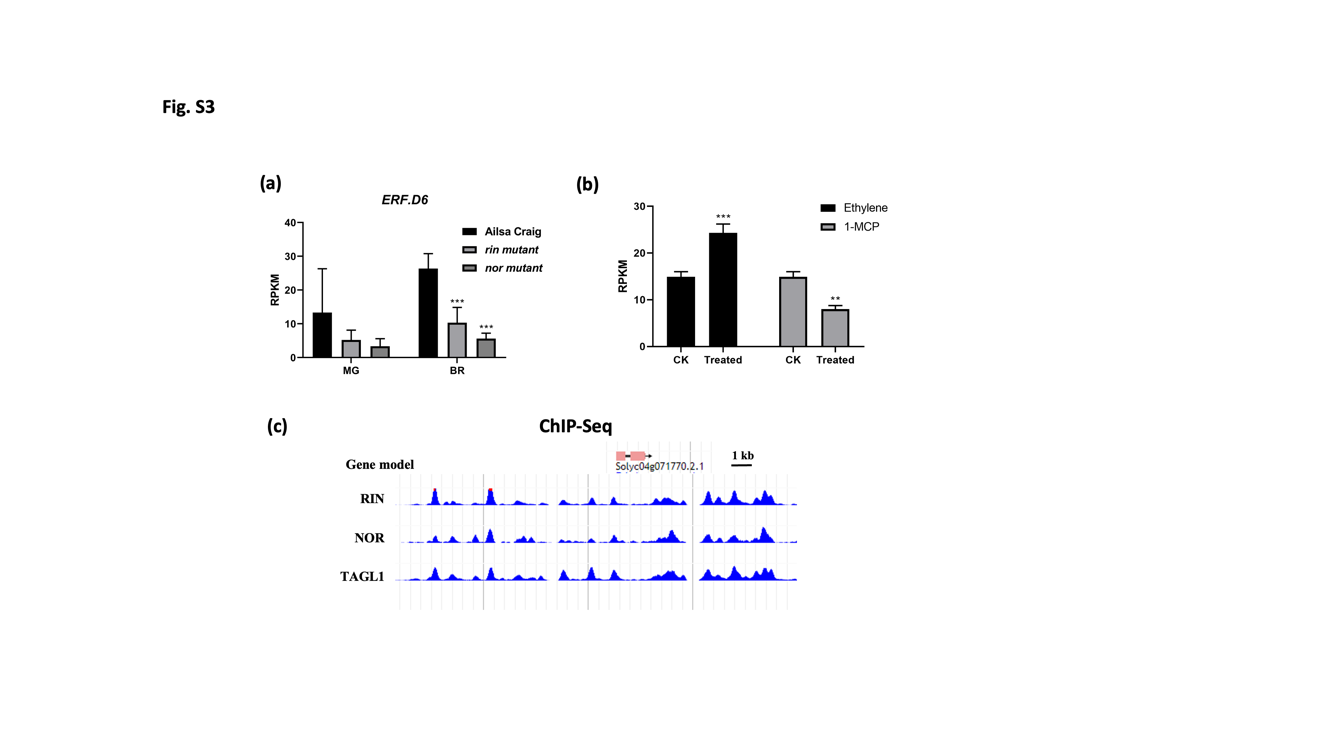


**Fig. S3 *SlERF.D6* gene expression and promoter binding to ripening TFs.**

**(a)** *SlERF.D6* expression in both the ripening deficient *rin* and *nor* mutants at the mature green (MG) and breaker (BR) stage where BR mutant fruits are the same age as the WT (Ailsa Craig) control.**(b)** *SlERF.D6* expression following treatment with exogenous ethylene (20 ppm) or treatment with the ethylene action inhibitor 1-MCP. **(c)** ChIP-Seq profiles of the promoter region of *SlERF.D6.* Peaks indicate binding sites of RIN-MADS, NOR-NAC and TAGL1.

Values are means ± SE. Statistical significance determined by Student’s t-test: *, 0.01 < P < 0.05; ***, P < 0.001. DPA, days post anthesis.


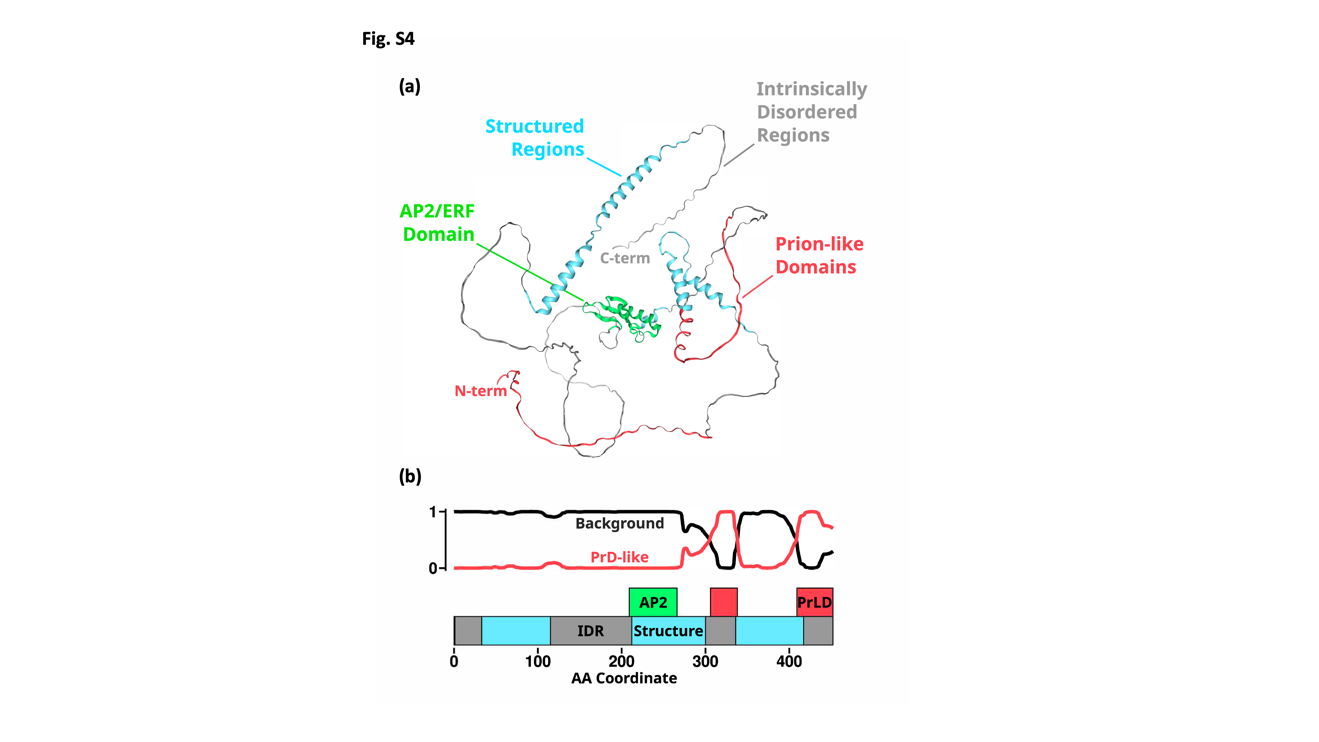


**Fig. S4 *SlERF.D6* predicted protein structure.**

**(a)** Alphafold2 protein structure and **(b)** the domain results from MobiDB and PLAAC.

IDR, intrinsically disordered region; PrLD, prion-like domain.


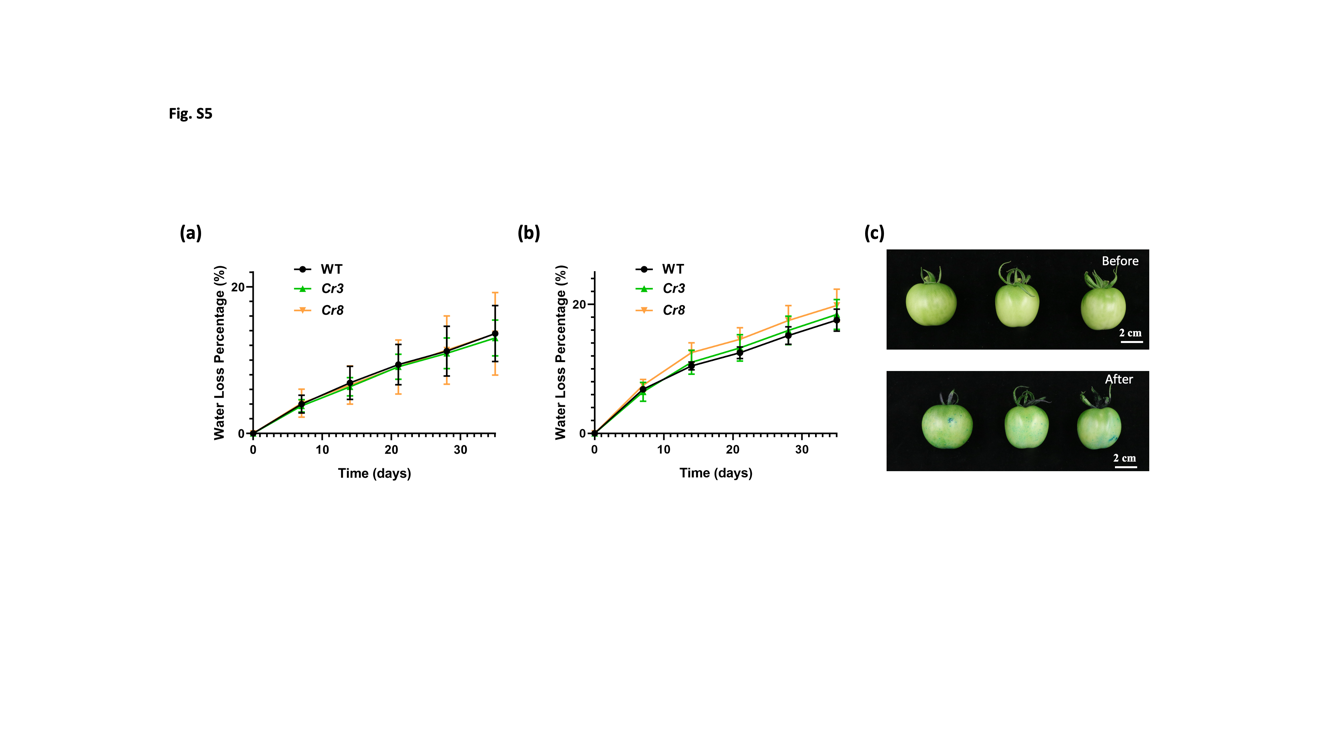


**Fig. S5 Water loss and cuticle staining in WT and *SlERF.D6* gene-edited mutants.**

Water loss as percentage of fruit weight. Fruits were harvested at **(a)** breaker post seven (BR+7) stage or **(b)** 30DPA and kept at room temperature for five weeks. Weight loss of each individual fruit was calculated every seven days. Error bars indicate ± SE (n ≥ 5). **(c)** Toluidine Blue solution staining. Fruits were harvested at MG stage and stained with 1% TB solution for 22 hrs.


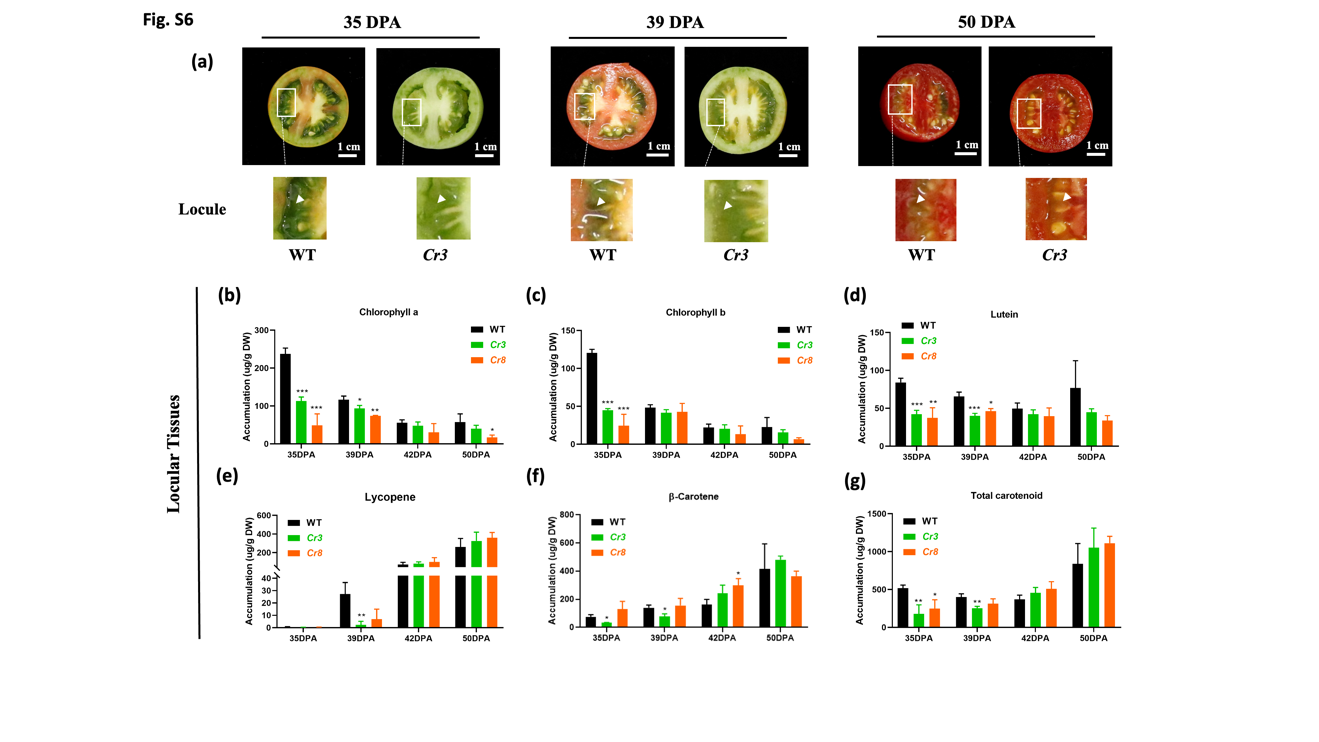


**Fig. S6 Carotenoid accumulation in locule tissues of *SlERF.D6* gene-edited mutants.**

**(a)** Images of WT and *Cr3* mutant fruit sectionsat the indicated ripening stages. White triangles highlight locular tissues. DPA, days post anthesis. **(b)** Chlorophyll a, **(c)** Chlorophyll b, **(d)** lutein, **(e)** lycopene, **(f)** β-carotene, **(g)** total carotenoid accumulation in WT and gene-edited mutants at the indicated ripening stages. Values represent means of at least three biological replicates. Vertical bars represent standard error. Statistical significance determined by Student’s t-test: *, 0.01 < P < 0.05; **, 0.001 < P < 0.01; ***, P < 0.001.


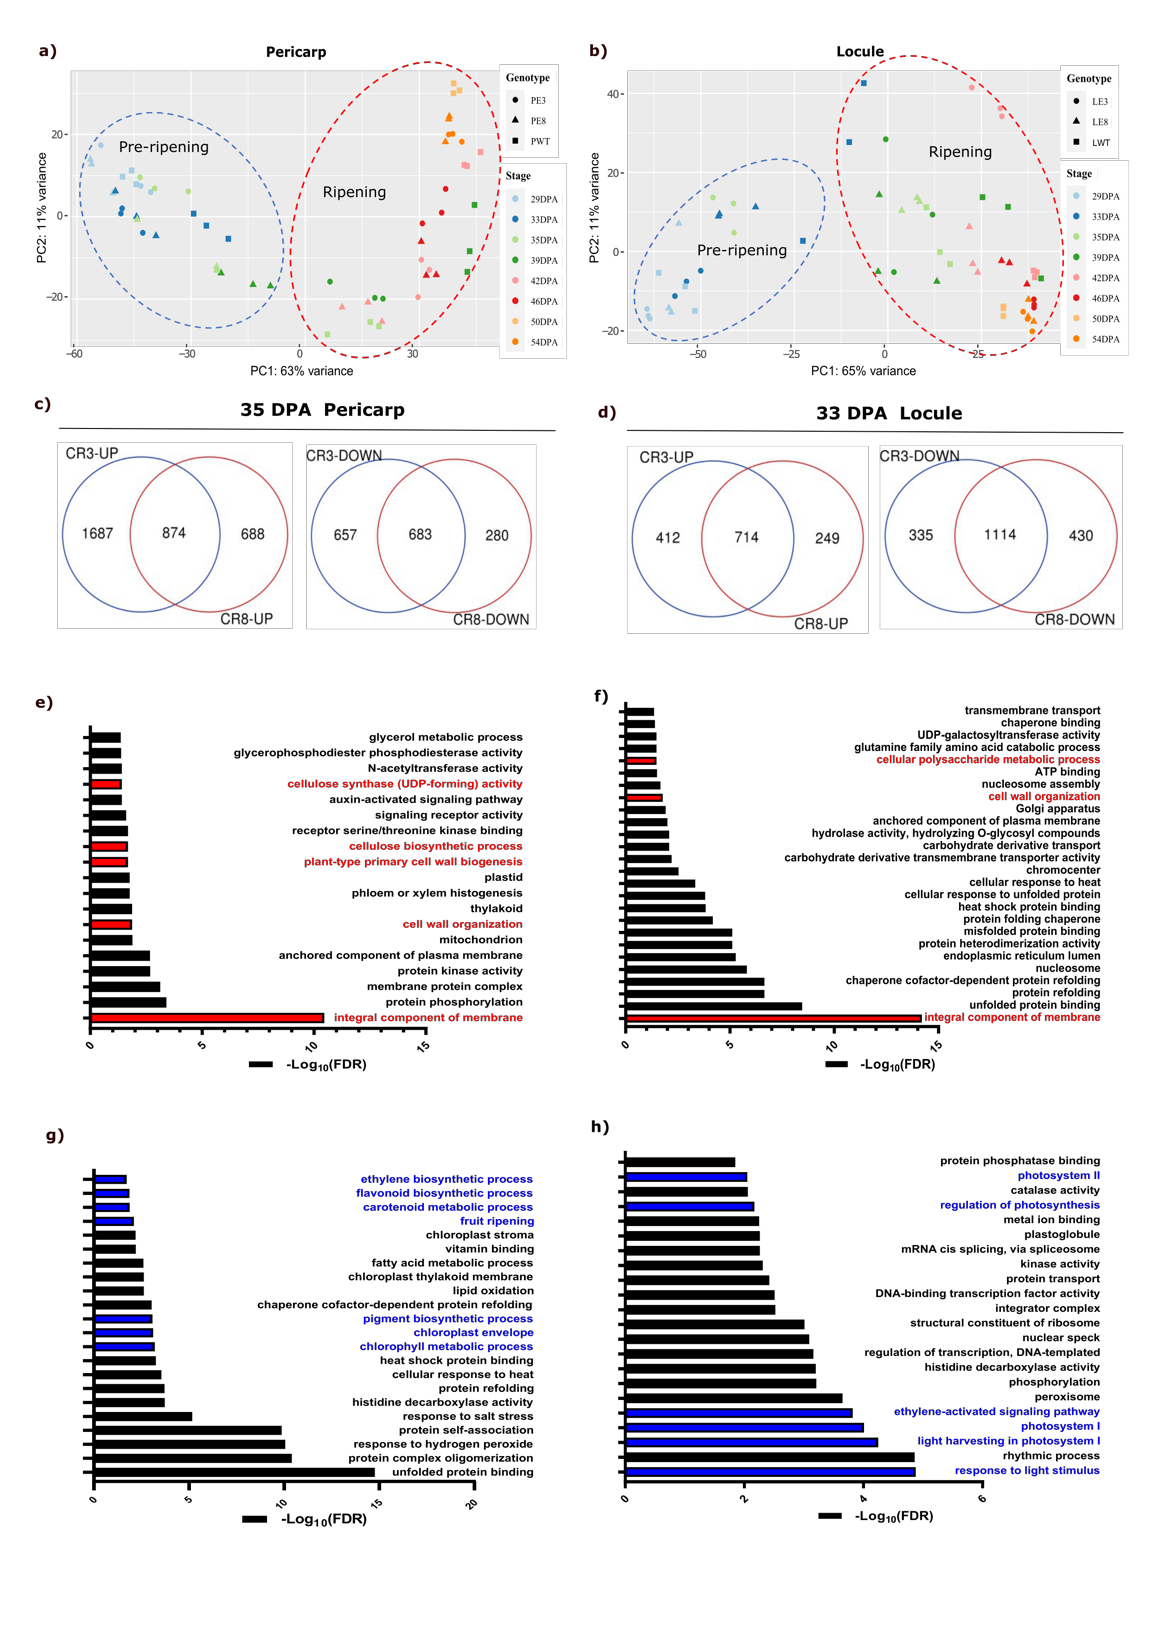


**Fig. S7 Transcriptome analysis of WT and *SlERF.D6* gene-edited fruit pericarp and locule tissues.**

Principal component analysis (PCA) plot representing transcriptional profiles of **(a)** pericarp and **(b)** locular tissues from WT and gene-edited fruits. A cluster containing pre-ripening stages is indicated with a blue dashed circle and another encompassing ripening stages is indicated in a red dashed circle. PE3, Pericarp of *ERF.D6* gene edited line 3 (*Cr3*); PE8, Pericarp of *ERF.D6* gene-edited line 8 (Cr8). LE3, Locule of Cr3; LE8, Locule of Cr8. **(c)** Venn diagrams depicting the overlap in significantly up and downregulated genes in gene-edited mutants relative to WT for pericarp tissues at 35 DPA. **(d)** Venn diagrams depicting the overlap in significantly up and downregulated genes in mutants relative to WT for locular tissues at 33 DPA. DPA, days post anthesis. Upregulated GO terms in **(e)** pericarp and **(f)** locule. Downregulated GO terms in **(g)** pericarp and **(h)** locule.


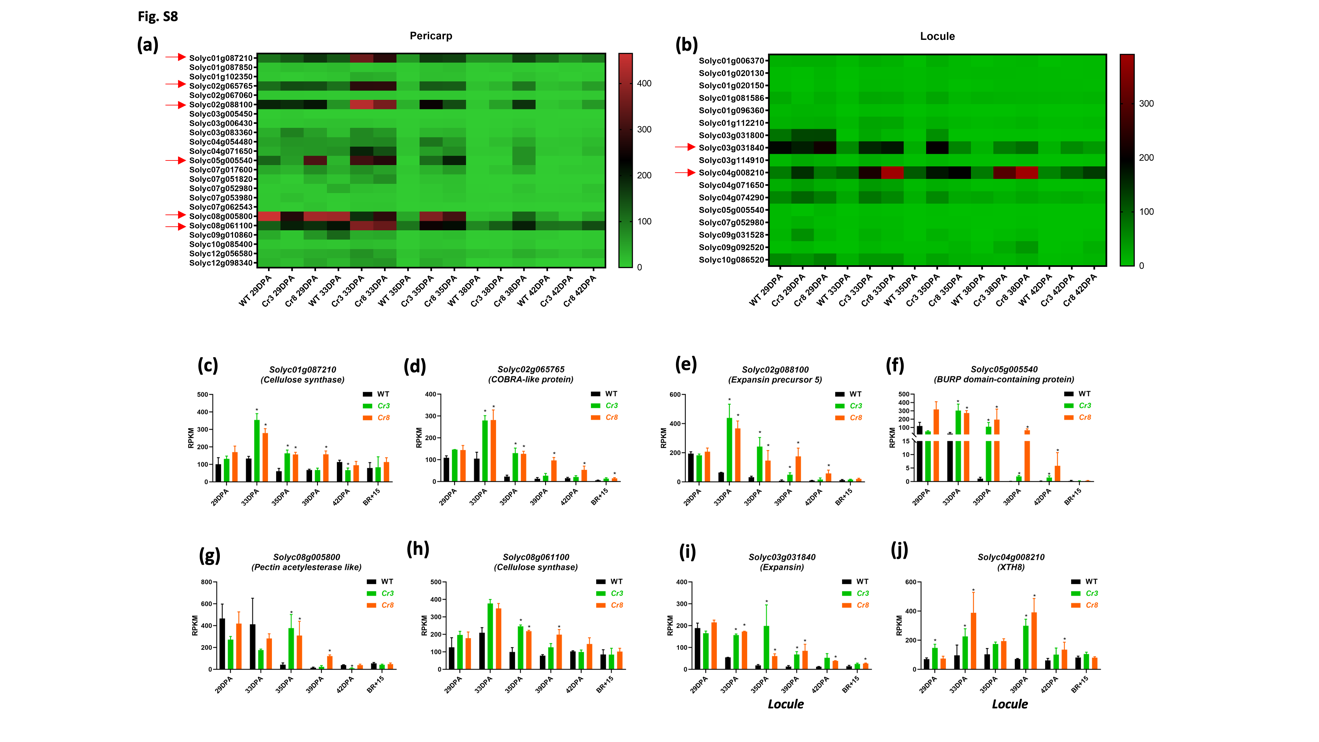


**Fig.S8 Expression levels of cell wall associated genes.**

Heatmap depicting the expression levels (RPKM) of cell wall associated genes identified in upregulated GO terms of **(a)** 35DPA pericarp and **(b)** 33DPA locule. Red arrows highlight eight strong DEGs: **(c), (h)** Cellulose synthase, **(d)** COBRA-like protein, **(e), (i)** Expansin-associated protein **(f)**, BURP domain-containing protein, **(g)** pectin acetylesterase like protein, and **(j)** endotransglucosylase/XTH8. RPKM, Reads Per Kilobase of transcript per Million mapped reads.  *, adjust P < 0.05.


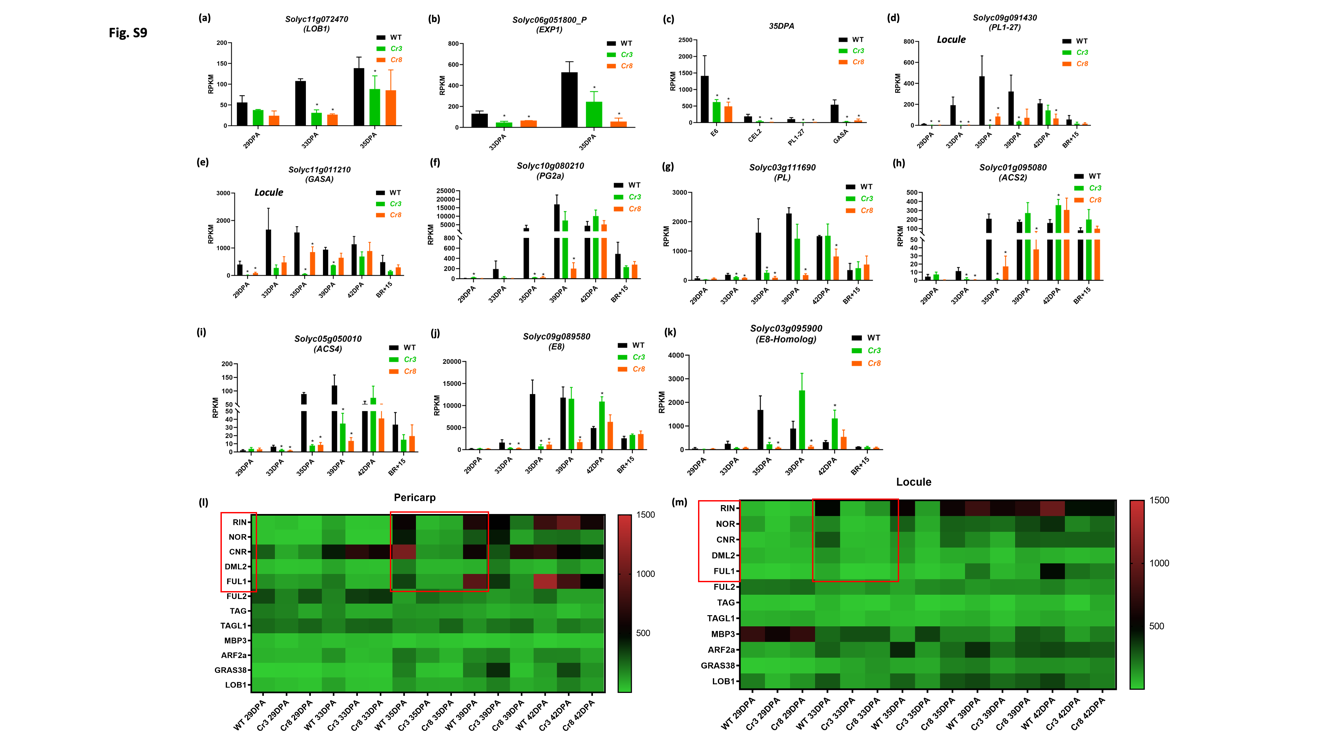


**Fig.S9 Expression levels of additional cell wall regulators, ripening- and ethylene-associated genes.**

Expression levels of cell wall regulators: **(a)** *LOB1*; **(b)** *EXP1*; **(c)** *E6, CEL2, PL1-27*, and *GASA* in pericarp tissues; **(d)** *PL1-27* and **(e)** *GASA* in locular tissue. Expression levels of ripening- and ethylene- associated genes: **(f)** *PG2a*; **(g)** *PL*; **(h)** *ACS2*; **(i)** *ACS4*; **(j)** *E8*; **(k)** *E8-Homolog* in pericarp tissues. Heatmap depicting the expression levels of ripening regulators in **(l)** pericarp and **(m)** locular tissues. Red boxes highlight strong DEGs at the indicated stages. RPKM, Reads Per Kilobase of transcript per Million mapped reads. *, adjust P < 0.05.


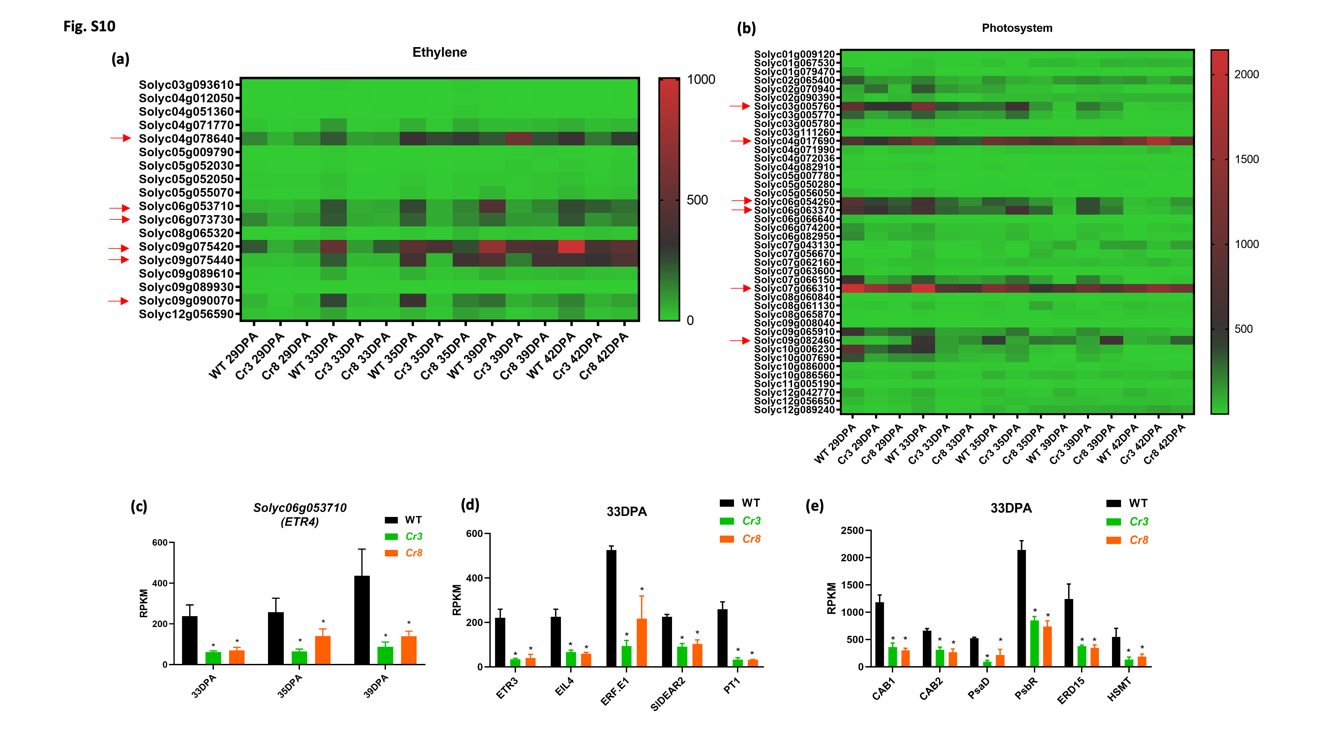


**Fig. S10 Expression levels of ethylene activated signaling and photosystem associated pathways**

Heatmap depicting the expression levels of **(a)** ethylene and **(b)** photosystem associated genes.

Red arrows highlight twelve strong DEGs. Expression levels of **(c)** ethylene receptor *ETR4* in locular tissues at indicated stages; **(d)** five ethylene-activated signaling pathway DEGs (*ETR3, EIL4, ERF.E1, SlDEAR2, PT1*) **(e)** six photosystem associated pathway DEGs (CAB1/2, PsaD, PsbR, ERD15, HSMT). Gene identifiers are listed in Dataset S9.

RPKM, Reads Per Kilobase of transcript per Million mapped reads. *, adjust P < 0.05.


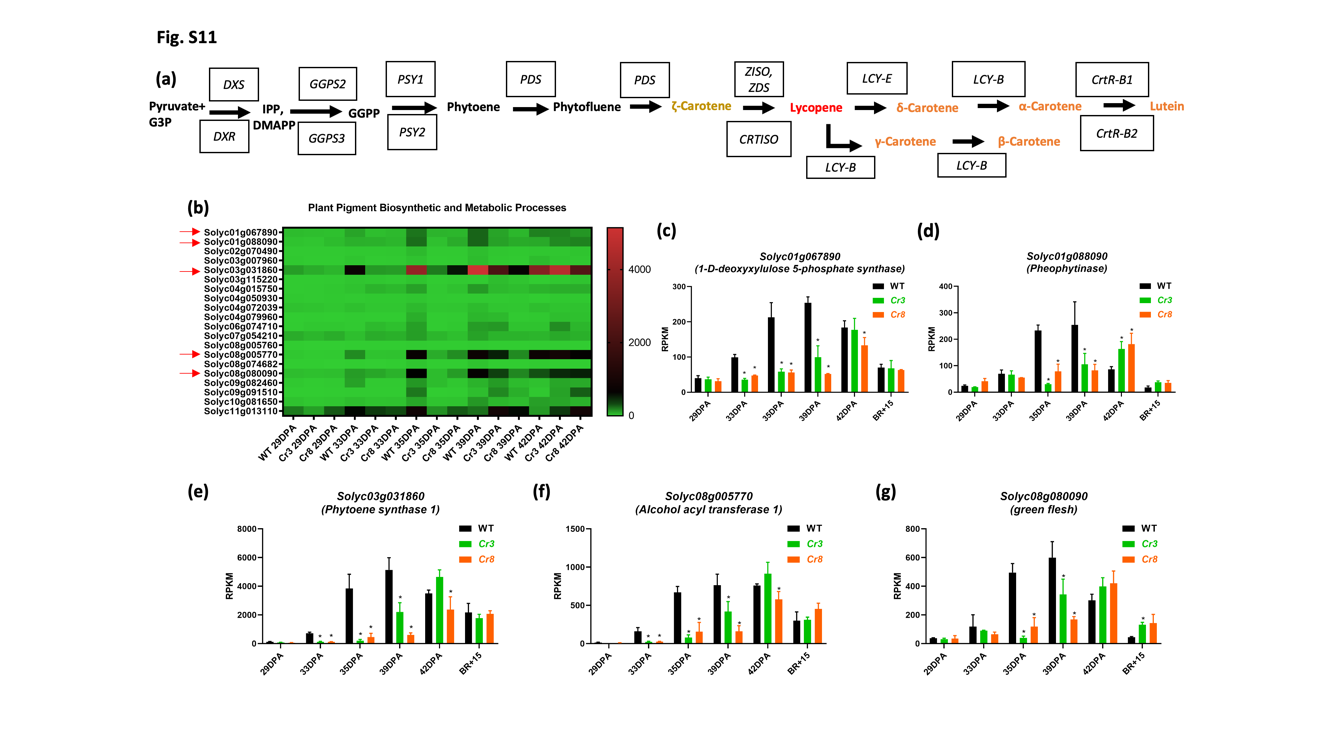


**Fig. S11 Plant pigment biosynthetic and metabolic processes in pericarp tissues**

**(a)** The carotenoid biosynthesis pathway in plants. **(b)** Heatmap depicting the expression levels of pigment associated genes identified in 35DPA pericarp. Red arrows indicate five strong DEGs.

Expression levels of five strong DEGs: **(c)** *DXS*, **(d)** *PPH*, **(e)** *PSY1*, **(f)** *AAT1*, **(g)** *GF*.

RPKM, Reads Per Kilobase of transcript per Million mapped reads.  *, adjust P < 0.05. Gene identifiers are listed in Dataset S9.


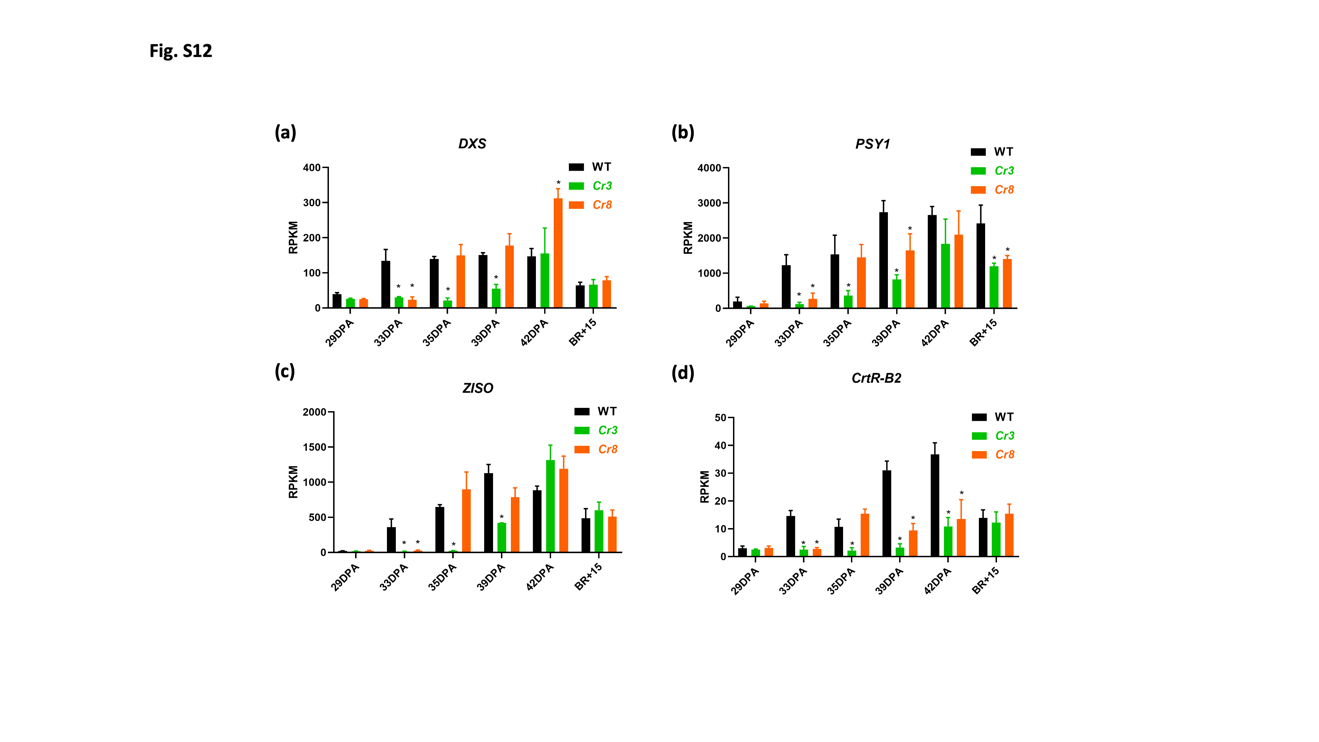


**Fig. S12 Analysis of carotenoid biosynthesis gene expression in locular tissue.**

Expression levels of **(a)** *DXS*,**(b)** *PSY1,* **(c)** *ZISO,* **(d)** *CrtR-B2* in locule tissue at the indicated stages. Error bars are ±SE. * adjusted *P* < 0.05. *DXS, 1-deoxy-d-xylulose 5-phosphate synthase; PSY1, phytoene synthase 1; ZISO, ζ-carotene isomerase; CrtR-B2,*β*-carotene hydroxylase 2.*


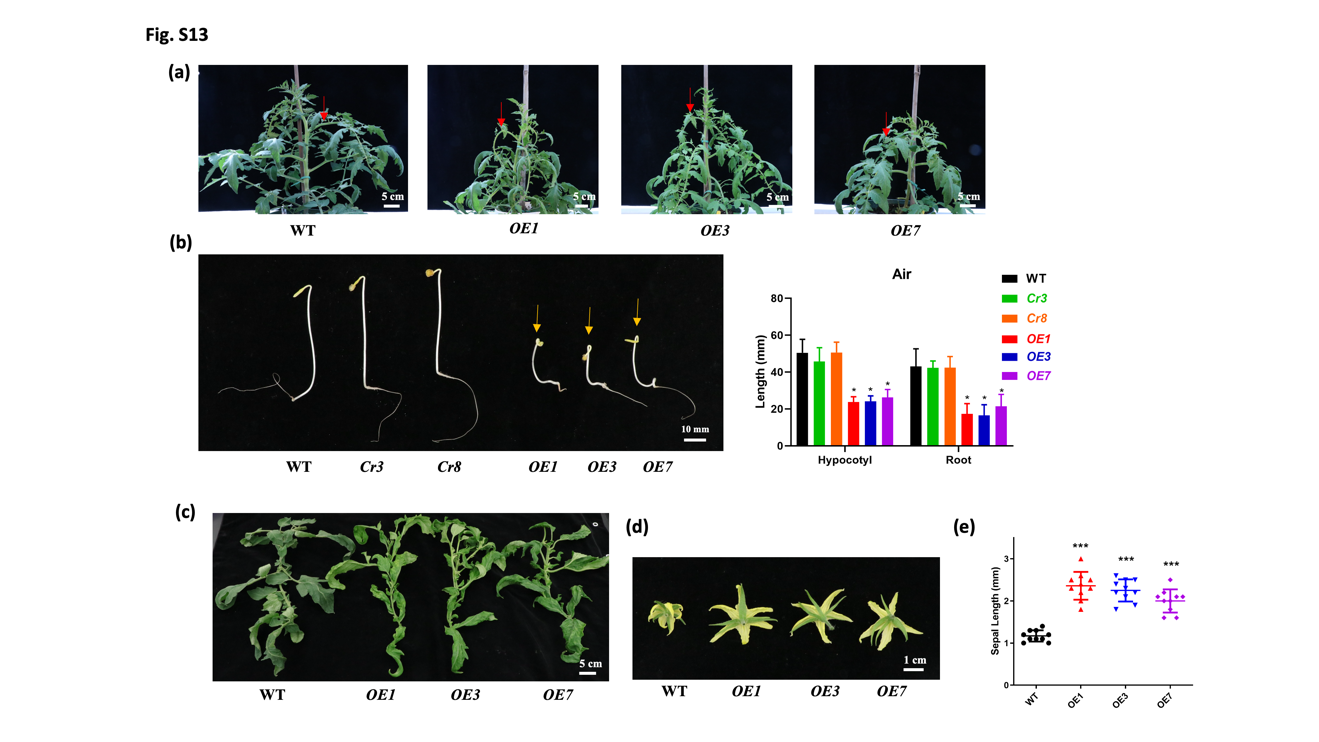


**Fig. S13 Plant developmental phenotypes in *SlERF.D6-OE* lines**

**(a)** Epinasty phenotype of *SlERF.D6-OE* lines. Red arrows highlight curled leaves. **(b)** Triple response of seedlings. Orange arrows highlight seedling apical hooks. **(c)** Leaves. **(d)** Flower size and **(e)** sepal length. Statistical significance determined by Student’s t-test: *, 0.01 < P < 0.05; ***, P < 0.001. Error bars indicate SE. *OE1, OE3,* and *OE7* are three independent *SlERF.D6* overexpressing lines.


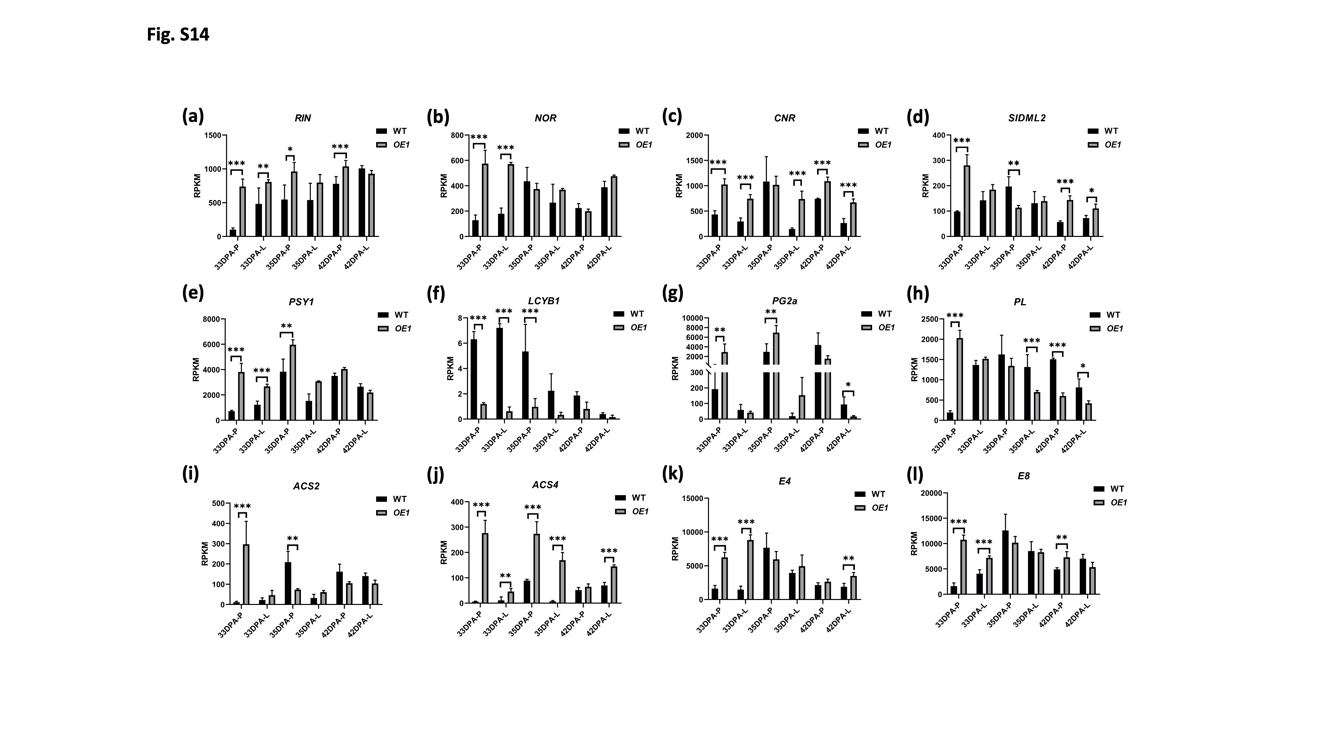


**Fig. S14 Analysis of expressions of ripening TFs, carotenoid synthesis, cell wall, and ethylene biosynthesis and responsive genes in *SlERF.D6* over-expression line *OE1*.**

Expression levels of well-known transcription regulators **(a)** *RIN,* **(b)** *NOR,* **(c)** *CNR*,and **(d)** *DML2*; carotenoids genes **(e)** *PSY1* and **(f)** *LCYB1*; cell wall genes **(g)** *PG2a* and **(h)** *PL*; ethylene biosynthesis and responsive genes **(i)** *ACS2,* **(j)** *ACS4,* **(k)** *E4* and **(l)** *E8* at the indicated stages. DPA, days post anthesis. P, pericarp; L, Locule. Error bars are ±SE. * adjusted *P* < 0.05; ** adjusted *P* < 0.01; *** adjusted *P* < 0.001.


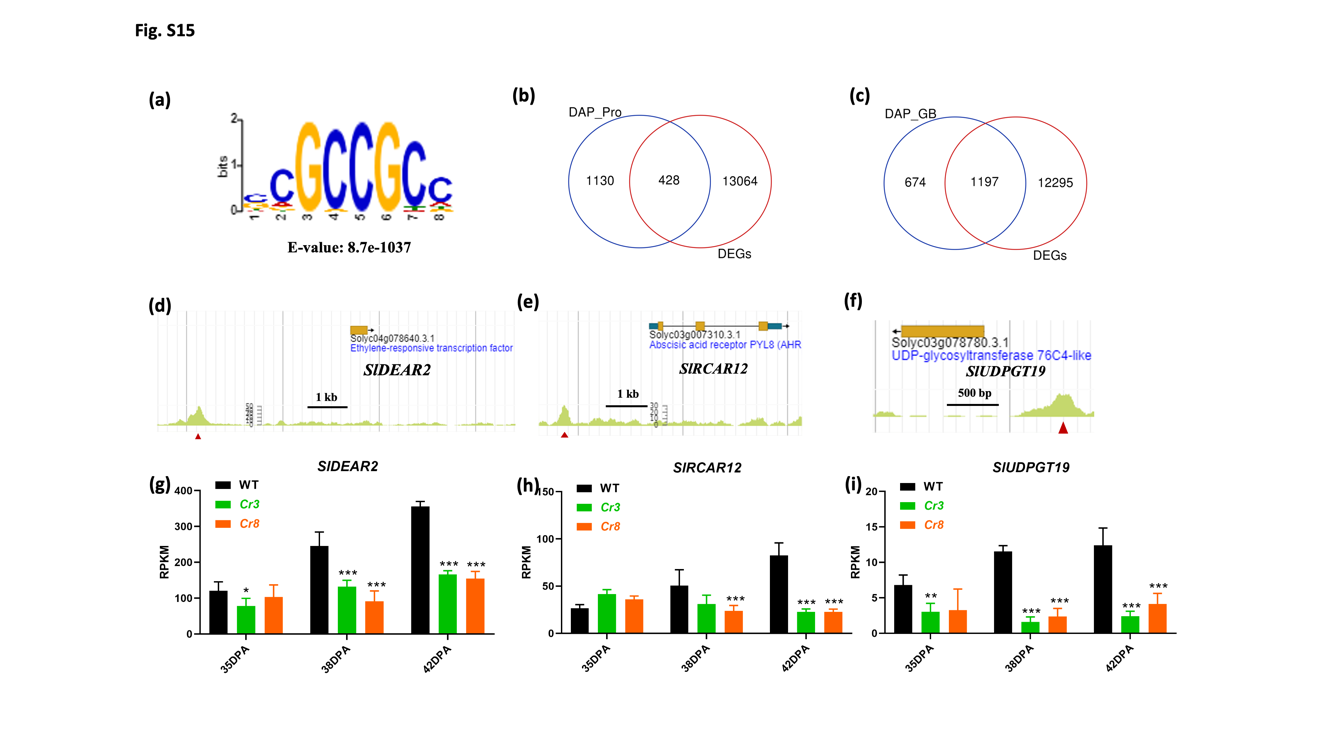


**Fig. S15 DAP-seq analysis of SlERF.D6 and three novel target genes.**

**(a)** Consensus DNA-binding motif of SlERF.D6. Venn diagram of differentially expression genes (DEGs) and targets with **(b)** upstream/promoter binding, and **(c)** gene-body binding sites. Genome browser view of SlERF.D6 binding at the promoter of **(d)** *SlDEAR2,* **(e)** ABA receptor *SlRCAR12*, and **(f)** UDP-glycosyltransferase *SlUDPGT19*. Expression levels of **(g)** *SlDEAR2*, **(h)** *SlRCAR12*, **(i)** *SlUDPGT19* in pericarp tissues at indicated stages of WT and gene-edited fruit. DPA, days post anthesis. Error bars are ±SE. * adjusted *P* < 0.05; ** adjusted *P* < 0.01; *** adjusted *P* < 0.001.


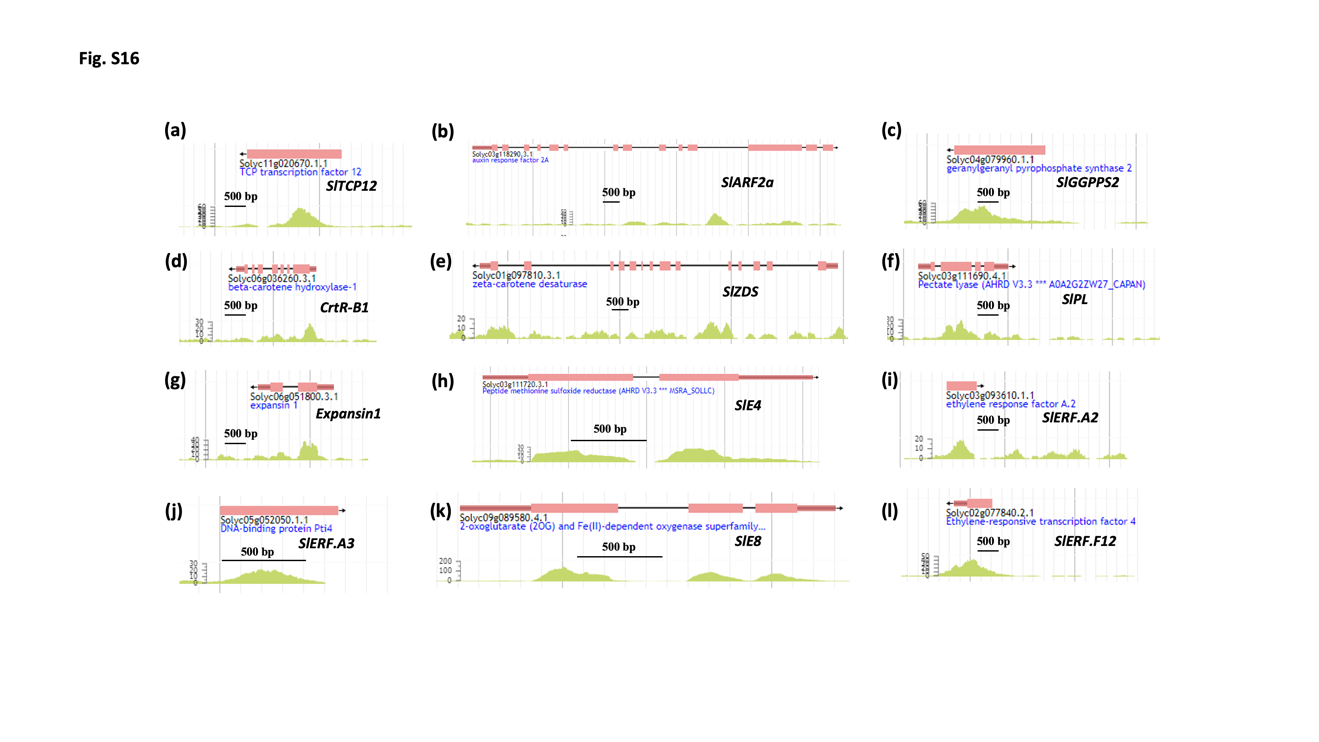


**Fig. S16 Twelve fruit ripening associated genes showing SlERF.D6 binding sites in the gene body regions.**

Genome browser view of the binding site in **(a)** *SlTCP12,* **(b)** *SlARF2a,* **(c)** *SlGGPPS2,* **(d)** *SlZDS,* **(e)** *CrtR-B1,* **(f)** *SlPL,* **(g)** *Expansin1,* **(h)** *SlE4,* **(i)** *SlE8,* **(j)** *SlERF.A2,* **(k)** *SlERF.A3,* and **(l)** *ERF.F12.* Gene identifiers are listed in Dataset S9.


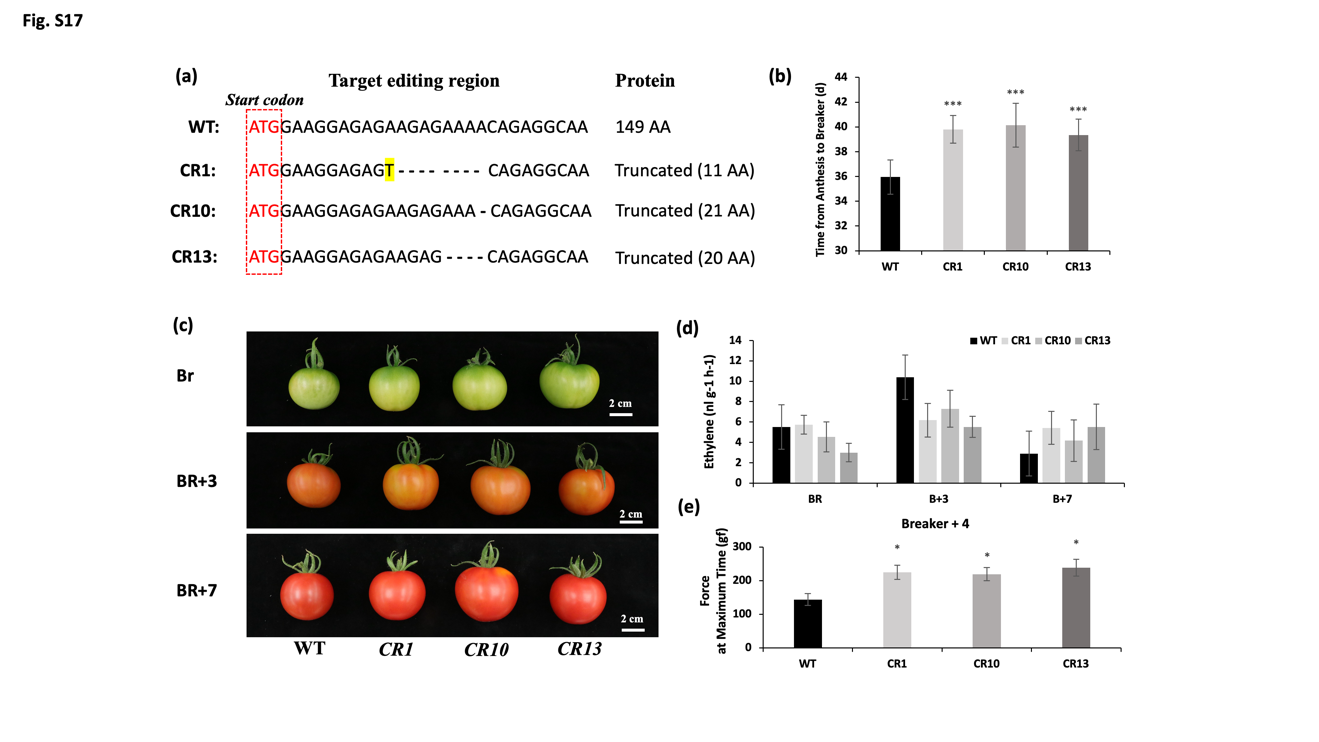


**Fig. S17 Ripening initiation, ethylene synthesis, and softening in *SlDEAR2* gene edited mutants.** **(a)** Sequence modifications resulting from gene edits in the indicated lines. Wild-type (WT), results in a predicted149 amino acids peptide.  Gene edited line *CR1*, 1 bp nucleotide substitution and an adjacent 8 bp were deleted resulting in a predicted truncated 11 amino acid protein. Gene edited line *CR10,* 1 bp was deleted leading to a predicted truncated protein of 21 amino acids. Gene edited line *CR13,* 4 bp deletion causing a frameshift and resulting in a truncated protein of 20 amino acids. **(b)** Time from anthesis to the breaker stage (Br) in WT and gene edited lines. **(c)** WT and gene edited fruit images through development. **(d)** Ethylene synthesis at the BR+3 stage. **(e)** Fruit firmness at the BR+4 stage. Asterisks indicate statistical significance using Student’s t-test: *, 0.01 < P < 0.05; ***, P < 0.001. Error bars indicate SE.


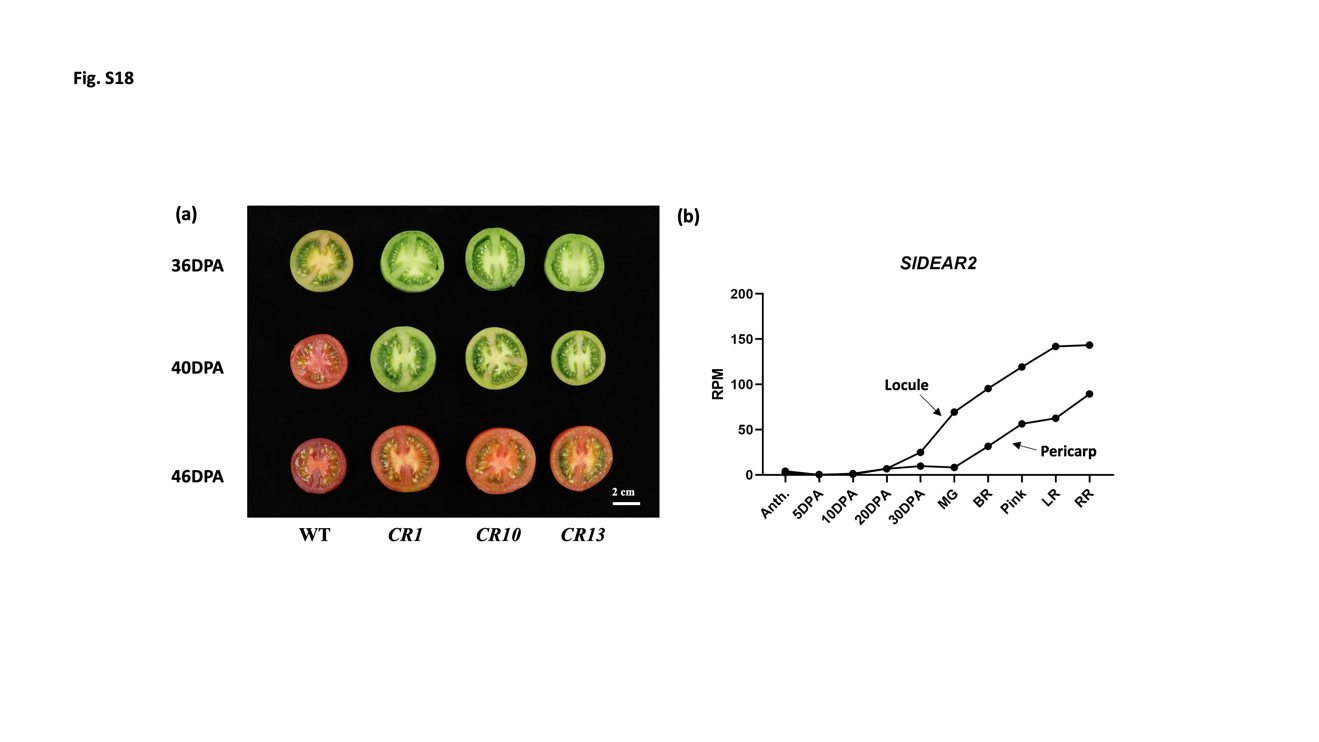


**Fig. S18 Locular phenotypes of edited *SlDEAR2* mutantsand *SlDEAR2* expression. (a)** Fruit cut at the indicated DPA to examine locule color. **(b)** Expression pattern of *SlDEAR2* in fruit locule and pericarp from the Tomato Expression Atlas (https://tea.solgenomics.net/).


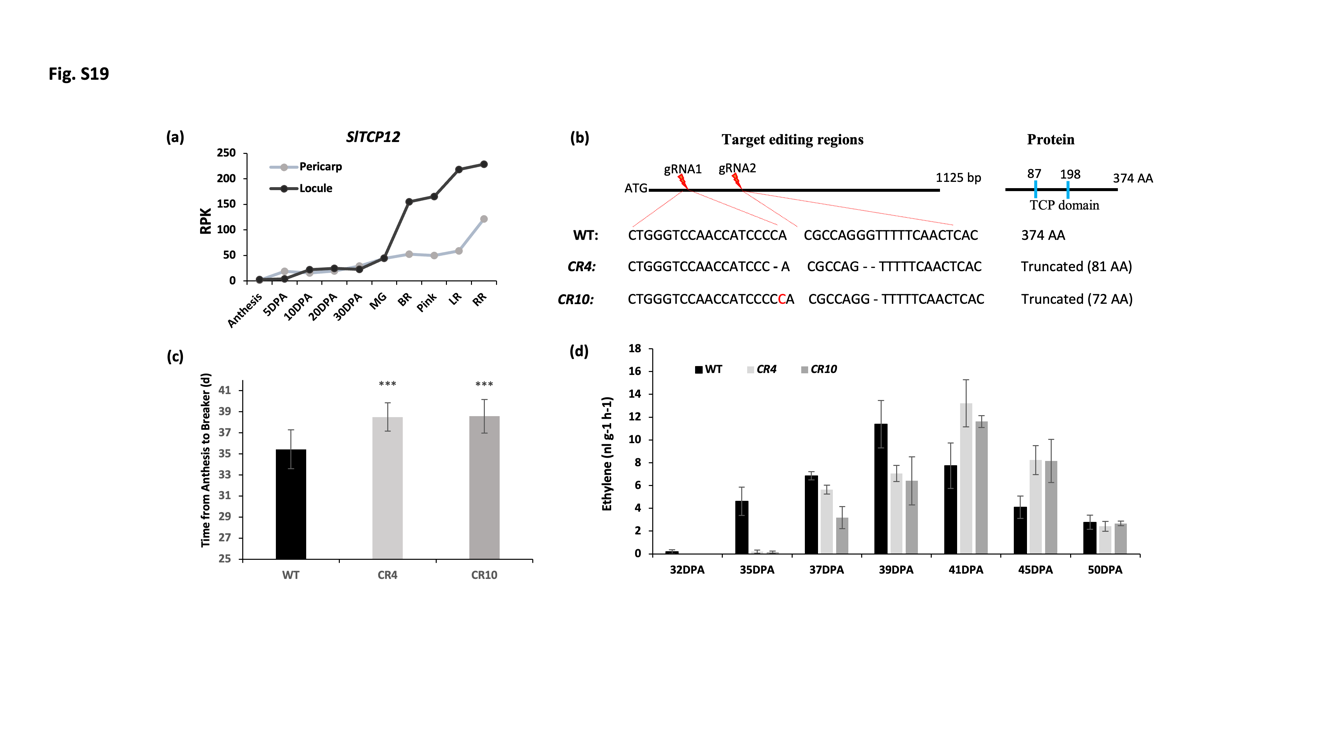


**Fig. S19 *SlTCP12* gene expression, gene editing mutations, time to ripening, and ethylene synthesis.**

**(a)** Expression of *SlTCP12* in pericarp and locule tissue from the Tomato Expression Atlas. **(b)** Sequence modifications resulting from gene edits in the indicated lines. WT *SlTCP12* genome sequence predicts a 374 amino acids peptide. Gene edited line *CR4*, 3 bp deleted resulting in a predicted truncated protein of 81 amino acids. Gene edited line *CR10,* 1 bp insertion and deletion occurred leading to a predicted truncated protein of 72 amino acids. **(c)** Time period from anthesis to the breaker stage (Br) in WT and gene edited lines. Asterisks indicate statistical significance using Student’s t-test: ***, P < 0.001. For each line, n = 20. **(d)** Ethylene production in WT and gene edited fruits at indicated stages. Values represent means of at least six individual fruits.


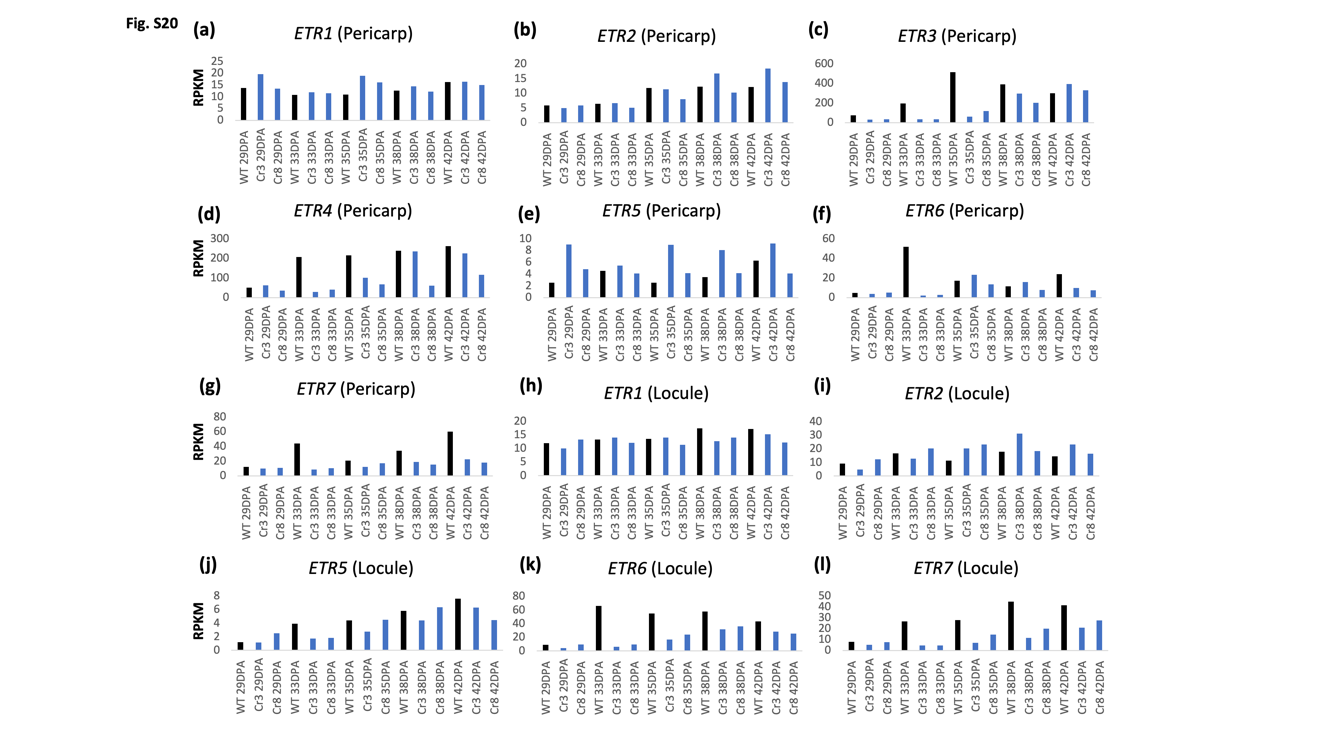


**Fig. S20 Analysis of expressions of ethylene receptor ETRs.**

**(a - g)** Average expression levels of tomato ETR genes in pericarp tissue.  **(h - l)** Average expression of tomato ETR genes in locular tissue.

Dataset S1. Ripening transcription factors.

Dataset S2. CRISPR/Cas9 edited mutations of 12 TFs in tomato cultivar *Ailsa Craig.*

Dataset S3. Gene expression in *SlERF.D6* gene edited mutants.

Dataset S4. Gene Ontology (GO) analysis of DEGs.

Dataset S5. Gene expression in *SlERF.D6-OE1*.

Dataset S6. SlERF.D6 targets identified by DAP-Seq.

Dataset S7. Target genes with altered gene expression.

Dataset S8. Primer information.

Dataset S9. Gene accession number.

**SI References**

1. H. Liu, *et al.*, CRISPR-P 2.0: An Improved CRISPR-Cas9 Tool for Genome Editing in Plants. *Molecular Plant* **10**, 530–532 (2017).

2. T. B. Jacobs, G. B. Martin, High-throughput CRISPR Vector Construction and Characterization of DNA Modifications by Generation of Tomato Hairy Roots. *JoVE*, 53843 (2016).

3. J. Van Eck, P. Keen, M. Tjahjadi, “Agrobacterium tumefaciens-Mediated Transformation of Tomato” in *Transgenic Plants*, Methods in Molecular Biology., S. Kumar, P. Barone, M. Smith, Eds. (Springer New York, 2019), pp. 225–234.

4. Y. Shinozaki, *et al.*, High-resolution spatiotemporal transcriptome mapping of tomato fruit development and ripening. *Nat Commun* **9**, 364 (2018).

5. T. Wu, J. A. Abbott, Firmness and force relaxation characteristics of tomatoes stored intact or as slices. *Postharvest Biology and Technology* **24**, 59–68 (2002).

6. I. Gonda, *et al.*, Sequencing‐Based Bin Map Construction of a Tomato Mapping Population, Facilitating High‐Resolution Quantitative Trait Loci Detection. *The Plant Genome* **12**, 180010 (2019).

7. S. Chang, J. Puryear, J. Cairney, A simple and efficient method for isolating RNA from pine trees. *Plant Mol Biol Rep* **11**, 113–116 (1993).

8. S. Zhong, *et al.*, High-Throughput Illumina Strand-Specific RNA Sequencing Library Preparation. *Cold Spring Harbor Protocols* **2011**, pdb.prot5652-pdb.prot5652 (2011).

9. The Tomato Genome Consortium, The tomato genome sequence provides insights into fleshy fruit evolution. *Nature* **485**, 635–641 (2012).

10. D. Kim, J. M. Paggi, C. Park, C. Bennett, S. L. Salzberg, Graph-based genome alignment and genotyping with HISAT2 and HISAT-genotype. *Nat Biotechnol* **37**, 907–915 (2019).

11. M. I. Love, W. Huber, S. Anders, Moderated estimation of fold change and dispersion for RNA-seq data with DESeq2. *Genome Biol* **15**, 550 (2014).

12. S. Gotz, *et al.*, High-throughput functional annotation and data mining with the Blast2GO suite. *Nucleic Acids Research* **36**, 3420–3435 (2008).

13. R. C. O’Malley, *et al.*, Cistrome and Epicistrome Features Shape the Regulatory DNA Landscape. *Cell* **165**, 1280–1292 (2016).

14. A. Bartlett, *et al.*, Mapping genome-wide transcription-factor binding sites using DAP-seq. *Nat Protoc* **12**, 1659–1672 (2017).
